# Supplementary material for: Relatively oxidized conditions for diamond formation at Udachnaya (Siberia)
Source: Copernicus journal article supplement (doi:10.5194/ejm-34-549-2022), 2022-11-15
Supplement: Supplementary file 1 [file ejm-34-549-2022-supplement.zip]

Archive with 4 entries (4 files):
- Supplementary File_Oli_CHR_1_DC_mchr.cif
- Supplementary File_Tables S1-S2.xlsx
- ejm-34-549-2022-supplement-title-page.pdf
- Supplementary File_Oli_CHR_1_DC_olivine.cif
