# Supplementary material for: Relatively oxidized conditions for diamond formation at Udachnaya (Siberia)
Source: Copernicus journal article supplement (doi:10.5194/ejm-34-549-2022), 2022-11-15
Supplement: Supplementary file 1 [file ejm-34-549-2022-supplement.zip › ejm-34-549-2022-supplement-title-page.pdf]

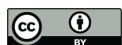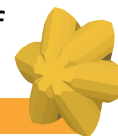

*Supplement of*

**Relatively oxidized conditions for diamond formation at Udachnaya (Siberia)**

**Luca Faccincani et al.**

*Correspondence to:* Luca Faccincani ([luca.faccincani@unife.it](mailto:luca.faccincani@unife.it))

- [ejm-34-549-2022-supplement-title-page.pdf](#)
- [Supplementary File\\_Oli\\_CHR\\_1\\_DC\\_mchr.cif](#)
- [Supplementary File\\_Oli\\_CHR\\_1\\_DC\\_olivine.cif](#)
- [Supplementary File\\_Tables S1-S2.xlsx](#)

The copyright of individual parts of the supplement might differ from the article licence.
