# Supplementary material for: Relatively oxidized conditions for diamond formation at Udachnaya (Siberia)
Source: Copernicus journal article supplement (doi:10.5194/ejm-34-549-2022), 2022-11-15
Supplement: Supplementary file 1 [file ejm-34-549-2022-supplement.zip › Supplementary File_Oli_CHR_1_DC_mchr.cif]

Relatively oxidized conditions for diamond formation at Udachnaya (Siberia)

Luca Faccincani 1, Valerio Cerantola 2,3, Fabrizio Nestola 4, Paolo Nimis 4, Luca Ziberna 5,6, Leonardo Pasqualetto 4, Aleksandr I. Chumakov 3, Jeffrey W. Harris 7, Massimo Coltorti 1

1 Department of Physics and Earth Sciences, University of Ferrara, Via Saragat 1, 44121 Ferrara, Italy
2 Department of Earth and Environmental Sciences, Università degli Studi di Milano-Bicocca, Piazza della Scienza 4, 20126 Milan, Italy
3 ESRF – The European Synchrotron, CS40220, 38043 Grenoble Cedex 9, France
4 Department of Geosciences, University of Padua, Via Gradenigo 6, 35131 Padua, Italy
5 Department of Mathematics and Geoscience, University of Trieste, Via Weiss 2, 34128 Trieste, Italy
6 Bayerisches Geoinstitut, University of Bayreuth, Universitätsstraße 30, 95440 Bayreuth, Germany
7 School of Geographical and Earth Sciences, University of Glasgow, G12 8QQ Glasgow, UK

Correspondence to: Luca Faccincani (luca.faccincani@unife.it)

#Magnesiochromite CIF file
 
data_Oli_CHR_1_DC_chromite
 
_audit_creation_method            'SHELXL-2017/1'
_shelx_SHELXL_version_number      '2017/1'
_chemical_name_mineral            Magnesiochromite
_chemical_formula_sum
 'Al0.16(3) Cr1.84(3) Fe0.42(1) Mg0.58(1) O4' 
_chemical_formula_weight          201.54

loop_
 _atom_type_symbol
 _atom_type_description
 _atom_type_scat_dispersion_real
 _atom_type_scat_dispersion_imag
 _atom_type_scat_source
 'Al'  'Al3+'   0.0560   0.0520
 'International Tables Vol C Tables 4.2.6.8 and 6.1.1.4'
 'Cr'  'Cr+3'   0.2840   0.6240
 'International Tables Vol C Tables 4.2.6.8 and 6.1.1.4'
 'Mg'  'Mg+2'   0.0420   0.0360
 'International Tables Vol C Tables 4.2.6.8 and 6.1.1.4'
 'Fe'  'Fe+2'   0.3010   0.8450
 'International Tables Vol C Tables 4.2.6.8 and 6.1.1.4'
 'O'  'O-2'   0.0080   0.0060
 'International Tables Vol C Tables 4.2.6.8 and 6.1.1.4'
 
_space_group_crystal_system       cubic
_space_group_IT_number            227
_space_group_name_H-M_alt         'F d -3 m'
_space_group_name_Hall            '-F 4vw 2vw 3'
 
_shelx_space_group_comment
;
The symmetry employed for this shelxl refinement is uniquely defined
by the following loop, which should always be used as a source of
symmetry information in preference to the above space-group names.
They are only intended as comments.
;
 
loop_
 _space_group_symop_operation_xyz
 'x, y, z'
 '-x+3/4, -y+1/4, z+1/2'
 '-x+1/4, y+1/2, -z+3/4'
 'x+1/2, -y+3/4, -z+1/4'
 'z, x, y'
 'z+1/2, -x+3/4, -y+1/4'
 '-z+3/4, -x+1/4, y+1/2'
 '-z+1/4, x+1/2, -y+3/4'
 'y, z, x'
 '-y+1/4, z+1/2, -x+3/4'
 'y+1/2, -z+3/4, -x+1/4'
 '-y+3/4, -z+1/4, x+1/2'
 'y+3/4, x+1/4, -z+1/2'
 '-y, -x, -z'
 'y+1/4, -x+1/2, z+3/4'
 '-y+1/2, x+3/4, z+1/4'
 'x+3/4, z+1/4, -y+1/2'
 '-x+1/2, z+3/4, y+1/4'
 '-x, -z, -y'
 'x+1/4, -z+1/2, y+3/4'
 'z+3/4, y+1/4, -x+1/2'
 'z+1/4, -y+1/2, x+3/4'
 '-z+1/2, y+3/4, x+1/4'
 '-z, -y, -x'
 'x, y+1/2, z+1/2'
 '-x+3/4, -y+3/4, z+1'
 '-x+1/4, y+1, -z+5/4'
 'x+1/2, -y+5/4, -z+3/4'
 'z, x+1/2, y+1/2'
 'z+1/2, -x+5/4, -y+3/4'
 '-z+3/4, -x+3/4, y+1'
 '-z+1/4, x+1, -y+5/4'
 'y, z+1/2, x+1/2'
 '-y+1/4, z+1, -x+5/4'
 'y+1/2, -z+5/4, -x+3/4'
 '-y+3/4, -z+3/4, x+1'
 'y+3/4, x+3/4, -z+1'
 '-y, -x+1/2, -z+1/2'
 'y+1/4, -x+1, z+5/4'
 '-y+1/2, x+5/4, z+3/4'
 'x+3/4, z+3/4, -y+1'
 '-x+1/2, z+5/4, y+3/4'
 '-x, -z+1/2, -y+1/2'
 'x+1/4, -z+1, y+5/4'
 'z+3/4, y+3/4, -x+1'
 'z+1/4, -y+1, x+5/4'
 '-z+1/2, y+5/4, x+3/4'
 '-z, -y+1/2, -x+1/2'
 'x+1/2, y, z+1/2'
 '-x+5/4, -y+1/4, z+1'
 '-x+3/4, y+1/2, -z+5/4'
 'x+1, -y+3/4, -z+3/4'
 'z+1/2, x, y+1/2'
 'z+1, -x+3/4, -y+3/4'
 '-z+5/4, -x+1/4, y+1'
 '-z+3/4, x+1/2, -y+5/4'
 'y+1/2, z, x+1/2'
 '-y+3/4, z+1/2, -x+5/4'
 'y+1, -z+3/4, -x+3/4'
 '-y+5/4, -z+1/4, x+1'
 'y+5/4, x+1/4, -z+1'
 '-y+1/2, -x, -z+1/2'
 'y+3/4, -x+1/2, z+5/4'
 '-y+1, x+3/4, z+3/4'
 'x+5/4, z+1/4, -y+1'
 '-x+1, z+3/4, y+3/4'
 '-x+1/2, -z, -y+1/2'
 'x+3/4, -z+1/2, y+5/4'
 'z+5/4, y+1/4, -x+1'
 'z+3/4, -y+1/2, x+5/4'
 '-z+1, y+3/4, x+3/4'
 '-z+1/2, -y, -x+1/2'
 'x+1/2, y+1/2, z'
 '-x+5/4, -y+3/4, z+1/2'
 '-x+3/4, y+1, -z+3/4'
 'x+1, -y+5/4, -z+1/4'
 'z+1/2, x+1/2, y'
 'z+1, -x+5/4, -y+1/4'
 '-z+5/4, -x+3/4, y+1/2'
 '-z+3/4, x+1, -y+3/4'
 'y+1/2, z+1/2, x'
 '-y+3/4, z+1, -x+3/4'
 'y+1, -z+5/4, -x+1/4'
 '-y+5/4, -z+3/4, x+1/2'
 'y+5/4, x+3/4, -z+1/2'
 '-y+1/2, -x+1/2, -z'
 'y+3/4, -x+1, z+3/4'
 '-y+1, x+5/4, z+1/4'
 'x+5/4, z+3/4, -y+1/2'
 '-x+1, z+5/4, y+1/4'
 '-x+1/2, -z+1/2, -y'
 'x+3/4, -z+1, y+3/4'
 'z+5/4, y+3/4, -x+1/2'
 'z+3/4, -y+1, x+3/4'
 '-z+1, y+5/4, x+1/4'
 '-z+1/2, -y+1/2, -x'
 '-x, -y, -z'
 'x-3/4, y-1/4, -z-1/2'
 'x-1/4, -y-1/2, z-3/4'
 '-x-1/2, y-3/4, z-1/4'
 '-z, -x, -y'
 '-z-1/2, x-3/4, y-1/4'
 'z-3/4, x-1/4, -y-1/2'
 'z-1/4, -x-1/2, y-3/4'
 '-y, -z, -x'
 'y-1/4, -z-1/2, x-3/4'
 '-y-1/2, z-3/4, x-1/4'
 'y-3/4, z-1/4, -x-1/2'
 '-y-3/4, -x-1/4, z-1/2'
 'y, x, z'
 '-y-1/4, x-1/2, -z-3/4'
 'y-1/2, -x-3/4, -z-1/4'
 '-x-3/4, -z-1/4, y-1/2'
 'x-1/2, -z-3/4, -y-1/4'
 'x, z, y'
 '-x-1/4, z-1/2, -y-3/4'
 '-z-3/4, -y-1/4, x-1/2'
 '-z-1/4, y-1/2, -x-3/4'
 'z-1/2, -y-3/4, -x-1/4'
 'z, y, x'
 '-x, -y+1/2, -z+1/2'
 'x-3/4, y+1/4, -z'
 'x-1/4, -y, z-1/4'
 '-x-1/2, y-1/4, z+1/4'
 '-z, -x+1/2, -y+1/2'
 '-z-1/2, x-1/4, y+1/4'
 'z-3/4, x+1/4, -y'
 'z-1/4, -x, y-1/4'
 '-y, -z+1/2, -x+1/2'
 'y-1/4, -z, x-1/4'
 '-y-1/2, z-1/4, x+1/4'
 'y-3/4, z+1/4, -x'
 '-y-3/4, -x+1/4, z'
 'y, x+1/2, z+1/2'
 '-y-1/4, x, -z-1/4'
 'y-1/2, -x-1/4, -z+1/4'
 '-x-3/4, -z+1/4, y'
 'x-1/2, -z-1/4, -y+1/4'
 'x, z+1/2, y+1/2'
 '-x-1/4, z, -y-1/4'
 '-z-3/4, -y+1/4, x'
 '-z-1/4, y, -x-1/4'
 'z-1/2, -y-1/4, -x+1/4'
 'z, y+1/2, x+1/2'
 '-x+1/2, -y, -z+1/2'
 'x-1/4, y-1/4, -z'
 'x+1/4, -y-1/2, z-1/4'
 '-x, y-3/4, z+1/4'
 '-z+1/2, -x, -y+1/2'
 '-z, x-3/4, y+1/4'
 'z-1/4, x-1/4, -y'
 'z+1/4, -x-1/2, y-1/4'
 '-y+1/2, -z, -x+1/2'
 'y+1/4, -z-1/2, x-1/4'
 '-y, z-3/4, x+1/4'
 'y-1/4, z-1/4, -x'
 '-y-1/4, -x-1/4, z'
 'y+1/2, x, z+1/2'
 '-y+1/4, x-1/2, -z-1/4'
 'y, -x-3/4, -z+1/4'
 '-x-1/4, -z-1/4, y'
 'x, -z-3/4, -y+1/4'
 'x+1/2, z, y+1/2'
 '-x+1/4, z-1/2, -y-1/4'
 '-z-1/4, -y-1/4, x'
 '-z+1/4, y-1/2, -x-1/4'
 'z, -y-3/4, -x+1/4'
 'z+1/2, y, x+1/2'
 '-x+1/2, -y+1/2, -z'
 'x-1/4, y+1/4, -z-1/2'
 'x+1/4, -y, z-3/4'
 '-x, y-1/4, z-1/4'
 '-z+1/2, -x+1/2, -y'
 '-z, x-1/4, y-1/4'
 'z-1/4, x+1/4, -y-1/2'
 'z+1/4, -x, y-3/4'
 '-y+1/2, -z+1/2, -x'
 'y+1/4, -z, x-3/4'
 '-y, z-1/4, x-1/4'
 'y-1/4, z+1/4, -x-1/2'
 '-y-1/4, -x+1/4, z-1/2'
 'y+1/2, x+1/2, z'
 '-y+1/4, x, -z-3/4'
 'y, -x-1/4, -z-1/4'
 '-x-1/4, -z+1/4, y-1/2'
 'x, -z-1/4, -y-1/4'
 'x+1/2, z+1/2, y'
 '-x+1/4, z, -y-3/4'
 '-z-1/4, -y+1/4, x-1/2'
 '-z+1/4, y, -x-3/4'
 'z, -y-1/4, -x-1/4'
 'z+1/2, y+1/2, x'
 
_cell_length_a                    8.33274(6)
_cell_length_b                    8.33274(6)
_cell_length_c                    8.33274(6)
_cell_angle_alpha                 90
_cell_angle_beta                  90
_cell_angle_gamma                 90
_cell_volume                      578.580(12)
_cell_formula_units_Z             8
_cell_measurement_temperature     293(2)

_diffrn_ambient_temperature       293(2)
_diffrn_radiation_probe		  x-ray
_diffrn_radiation_type            MoK\a
_diffrn_source                    'micro-focuse sealed X-ray tube'
_diffrn_radiation_wavelength      0.71073
_diffrn_measurement_device_type   'Rigaku Oxford Diffraction SuperNova'

_exptl_absorpt_coefficient_mu     1.176
_exptl_absorpt_correction_type    interframe scaling
_exptl_absorpt_process_details    interframe scaling

_diffrn_reflns_number             22994
_diffrn_reflns_av_unetI/netI      0.0121
_diffrn_reflns_av_R_equivalents   0.0977
_diffrn_reflns_limit_h_min        -18
_diffrn_reflns_limit_h_max        18
_diffrn_reflns_limit_k_min        -18
_diffrn_reflns_limit_k_max        18
_diffrn_reflns_limit_l_min        -18
_diffrn_reflns_limit_l_max        18
_diffrn_reflns_theta_min          4.236
_diffrn_reflns_theta_max          50.567
_diffrn_reflns_theta_full         25.242
_diffrn_measured_fraction_theta_max   0.989
_diffrn_measured_fraction_theta_full  0.974
_diffrn_reflns_Laue_measured_fraction_max    0.989
_diffrn_reflns_Laue_measured_fraction_full   0.974
_diffrn_reflns_point_group_measured_fraction_max   0.989
_diffrn_reflns_point_group_measured_fraction_full  0.974
_reflns_number_total              180
_reflns_number_gt                 180
_reflns_threshold_expression      'I > 2\s(I)'
_reflns_Friedel_coverage          0.000
_reflns_Friedel_fraction_max      .
_reflns_Friedel_fraction_full     .
 
_reflns_special_details
;
 Reflections were merged by SHELXL according to the crystal
 class for the calculation of statistics and refinement.
 
 _reflns_Friedel_fraction is defined as the number of unique
 Friedel pairs measured divided by the number that would be
 possible theoretically, ignoring centric projections and
 systematic absences.
;

_computing_data_collection        
;
        CrysAlisPro, Agilent Technologies,
        Version 40.64.67a
;
_computing_cell_refinement        
;
        CrysAlisPro, Agilent Technologies,
        Version 40.64.67a
;
_computing_data_reduction         
;
        CrysAlisPro, Agilent Technologies,
        Version 40.64.67a
;
_computing_structure_refinement 'SHELXL-2017/1 (Sheldrick, 2017)'
_refine_ls_structure_factor_coef  Fsqd
_refine_ls_matrix_type            full
_refine_ls_weighting_scheme       calc
_refine_ls_weighting_details
'w=1/[\s^2^(Fo^2^)+(0.0254P)^2^+3.7811P] where P=(Fo^2^+2Fc^2^)/3'
_refine_ls_extinction_method      'SHELXL-2017/1 (Sheldrick 2017)'
_refine_ls_extinction_coef        0.0076(9)
_refine_ls_extinction_expression
 'Fc^*^=kFc[1+0.001xFc^2^\l^3^/sin(2\q)]^-1/4^'
_refine_ls_number_reflns          180
_refine_ls_number_parameters      12
_refine_ls_number_restraints      2
_refine_ls_R_factor_all           0.0205
_refine_ls_R_factor_gt            0.0205
_refine_ls_wR_factor_ref          0.0563
_refine_ls_wR_factor_gt           0.0563
_refine_ls_goodness_of_fit_ref    1.220
_refine_ls_restrained_S_all       1.213
_refine_ls_shift/su_max           0.000
_refine_ls_shift/su_mean          0.000
 
loop_
 _atom_site_label
 _atom_site_type_symbol
 _atom_site_fract_x
 _atom_site_fract_y
 _atom_site_fract_z
 _atom_site_U_iso_or_equiv
 _atom_site_adp_type
 _atom_site_occupancy
 _atom_site_site_symmetry_order  
 _atom_site_calc_flag
 _atom_site_refinement_flags_posn
 _atom_site_refinement_flags_adp
 _atom_site_refinement_flags_occupancy
 _atom_site_disorder_assembly
 _atom_site_disorder_group
O O-2 0.26204(10) 0.26204(10) 0.26204(10) 0.0048(2) Uani 1 6 d S T P . .
AlM Al3+ 0.500000 0.500000 0.500000 0.00310(11) Uani 0.079(14) 12 d S T P . .
CrM Cr+3 0.500000 0.500000 0.500000 0.00310(11) Uani 0.921(14) 12 d S T P . .
MgT Mg+2 0.125000 0.125000 0.125000 0.0056(2) Uani 0.583(12) 24 d S T P . .
FeT Fe+2 0.125000 0.125000 0.125000 0.0056(2) Uani 0.418(12) 24 d S T P . .
 
loop_
 _atom_site_aniso_label
 _atom_site_aniso_U_11
 _atom_site_aniso_U_22
 _atom_site_aniso_U_33
 _atom_site_aniso_U_23
 _atom_site_aniso_U_13
 _atom_site_aniso_U_12
O 0.0048(2) 0.0048(2) 0.0048(2) -0.00031(17) -0.00031(17) -0.00031(17)
AlM 0.00310(11) 0.00310(11) 0.00310(11) -0.00033(4) -0.00033(4) -0.00033(4)
CrM 0.00310(11) 0.00310(11) 0.00310(11) -0.00033(4) -0.00033(4) -0.00033(4)
MgT 0.0056(2) 0.0056(2) 0.0056(2) 0.000 0.000 0.000
FeT 0.0056(2) 0.0056(2) 0.0056(2) 0.000 0.000 0.000
 
_geom_special_details
;
 All esds (except the esd in the dihedral angle between two l.s. planes)
 are estimated using the full covariance matrix.  The cell esds are taken
 into account individually in the estimation of esds in distances, angles
 and torsion angles; correlations between esds in cell parameters are only
 used when they are defined by crystal symmetry.  An approximate (isotropic)
 treatment of cell esds is used for estimating esds involving l.s. planes.
;
 
loop_
 _geom_bond_atom_site_label_1
 _geom_bond_atom_site_label_2
 _geom_bond_distance
 _geom_bond_site_symmetry_2
 _geom_bond_publ_flag
O MgT 1.9779(14) . ?
O AlM 1.9879(7) 75_545 ?
O AlM 1.9879(7) 52_455 ?
O AlM 1.9879(7) 26_554 ?
AlM AlM 2.946069(19) 76_456 ?
AlM AlM 2.94607(2) 26_554 ?
AlM AlM 2.946069(19) 50_564 ?
AlM AlM 2.946069(19) 27_645 ?
AlM AlM 2.94607(2) 75_545 ?
AlM AlM 2.94607(2) 52_455 ?
MgT MgT 3.60818(3) 97 ?
MgT MgT 3.60818(3) 169 ?
MgT MgT 3.60818(2) 121 ?
MgT MgT 3.60818(3) 145 ?
 
loop_
 _geom_angle_atom_site_label_1
 _geom_angle_atom_site_label_2
 _geom_angle_atom_site_label_3
 _geom_angle
 _geom_angle_site_symmetry_1
 _geom_angle_site_symmetry_3
 _geom_angle_publ_flag
MgT O AlM 121.17(3) . 75_545 ?
MgT O AlM 121.17(3) . 52_455 ?
AlM O AlM 95.63(5) 75_545 52_455 ?
MgT O AlM 121.17(3) . 26_554 ?
AlM O AlM 95.63(5) 75_545 26_554 ?
AlM O AlM 95.63(5) 52_455 26_554 ?
O AlM O 180.0 122_656 26_554 ?
O AlM O 84.07(5) 122_656 148_665 ?
O AlM O 95.93(5) 26_554 148_665 ?
O AlM O 95.93(5) 122_656 52_455 ?
O AlM O 84.07(5) 26_554 52_455 ?
O AlM O 180.0 148_665 52_455 ?
O AlM O 95.93(5) 122_656 75_545 ?
O AlM O 84.07(5) 26_554 75_545 ?
O AlM O 95.93(5) 148_665 75_545 ?
O AlM O 84.07(5) 52_455 75_545 ?
O AlM O 84.07(5) 122_656 171_566 ?
O AlM O 95.93(5) 26_554 171_566 ?
O AlM O 84.07(5) 148_665 171_566 ?
O AlM O 95.93(5) 52_455 171_566 ?
O AlM O 180.0 75_545 171_566 ?
O AlM AlM 42.18(2) 122_656 76_456 ?
O AlM AlM 137.82(2) 26_554 76_456 ?
O AlM AlM 85.91(3) 148_665 76_456 ?
O AlM AlM 94.09(3) 52_455 76_456 ?
O AlM AlM 137.82(2) 75_545 76_456 ?
O AlM AlM 42.18(2) 171_566 76_456 ?
O AlM AlM 94.09(3) 122_656 26_554 ?
O AlM AlM 85.91(3) 26_554 26_554 ?
O AlM AlM 137.82(2) 148_665 26_554 ?
O AlM AlM 42.18(2) 52_455 26_554 ?
O AlM AlM 42.18(2) 75_545 26_554 ?
O AlM AlM 137.82(2) 171_566 26_554 ?
AlM AlM AlM 120.0 76_456 26_554 ?
O AlM AlM 85.91(3) 122_656 50_564 ?
O AlM AlM 94.09(3) 26_554 50_564 ?
O AlM AlM 42.18(2) 148_665 50_564 ?
O AlM AlM 137.82(2) 52_455 50_564 ?
O AlM AlM 137.82(2) 75_545 50_564 ?
O AlM AlM 42.18(2) 171_566 50_564 ?
AlM AlM AlM 60.0 76_456 50_564 ?
AlM AlM AlM 180.0 26_554 50_564 ?
O AlM AlM 42.18(2) 122_656 27_645 ?
O AlM AlM 137.82(2) 26_554 27_645 ?
O AlM AlM 42.18(2) 148_665 27_645 ?
O AlM AlM 137.82(2) 52_455 27_645 ?
O AlM AlM 94.09(3) 75_545 27_645 ?
O AlM AlM 85.91(3) 171_566 27_645 ?
AlM AlM AlM 60.0 76_456 27_645 ?
AlM AlM AlM 120.0 26_554 27_645 ?
AlM AlM AlM 60.0 50_564 27_645 ?
O AlM AlM 137.82(2) 122_656 75_545 ?
O AlM AlM 42.18(2) 26_554 75_545 ?
O AlM AlM 137.82(2) 148_665 75_545 ?
O AlM AlM 42.18(2) 52_455 75_545 ?
O AlM AlM 85.91(3) 75_545 75_545 ?
O AlM AlM 94.09(3) 171_566 75_545 ?
AlM AlM AlM 120.0 76_456 75_545 ?
AlM AlM AlM 60.0 26_554 75_545 ?
AlM AlM AlM 120.0 50_564 75_545 ?
AlM AlM AlM 180.0 27_645 75_545 ?
O AlM AlM 137.82(2) 122_656 52_455 ?
O AlM AlM 42.18(2) 26_554 52_455 ?
O AlM AlM 94.09(3) 148_665 52_455 ?
O AlM AlM 85.91(3) 52_455 52_455 ?
O AlM AlM 42.18(2) 75_545 52_455 ?
O AlM AlM 137.82(2) 171_566 52_455 ?
AlM AlM AlM 180.0 76_456 52_455 ?
AlM AlM AlM 60.0 26_554 52_455 ?
AlM AlM AlM 120.0 50_564 52_455 ?
AlM AlM AlM 120.0 27_645 52_455 ?
AlM AlM AlM 60.0 75_545 52_455 ?
O MgT O 109.5 76_445 27_544 ?
O MgT O 109.5 76_445 50_454 ?
O MgT O 109.5 27_544 50_454 ?
O MgT O 109.471(1) 76_445 . ?
O MgT O 109.5 27_544 . ?
O MgT O 109.5 50_454 . ?
O MgT MgT 70.529(1) 76_445 97 ?
O MgT MgT 70.529(1) 27_544 97 ?
O MgT MgT 70.529(1) 50_454 97 ?
O MgT MgT 180.000(19) . 97 ?
O MgT MgT 70.5 76_445 169 ?
O MgT MgT 70.5 27_544 169 ?
O MgT MgT 180.000(19) 50_454 169 ?
O MgT MgT 70.529(1) . 169 ?
MgT MgT MgT 109.471(1) 97 169 ?
O MgT MgT 180.00(6) 76_445 121 ?
O MgT MgT 70.5 27_544 121 ?
O MgT MgT 70.5 50_454 121 ?
O MgT MgT 70.5 . 121 ?
MgT MgT MgT 109.471(1) 97 121 ?
MgT MgT MgT 109.5 169 121 ?
O MgT MgT 70.5 76_445 145 ?
O MgT MgT 180.000(19) 27_544 145 ?
O MgT MgT 70.5 50_454 145 ?
O MgT MgT 70.5 . 145 ?
MgT MgT MgT 109.5 97 145 ?
MgT MgT MgT 109.5 169 145 ?
MgT MgT MgT 109.5 121 145 ?
 
_refine_diff_density_max    1.112
_refine_diff_density_min   -1.278
_refine_diff_density_rms    0.167

_shelx_res_file
;
TITL   Oli_Chr_1_cromite
    Oli_CHR_1_DC_cromite.res
    created by SHELXL-2017/1 at 18:24:29 on 30-Nov-2021
CELL    .71073  8.33274  8.33274  8.33274  90.00   90.00   90.00
ZERR   8         .00006   .00006   .00006   0       0       0
LATT   4
SYMM   .75-X,   .25-Y,   .5+Z
SYMM   .25-X,   .5+Y,   .75-Z
SYMM   .5+X,   .75-Y,   .25-Z
SYMM   Z,X,Y
SYMM   .5+Z,  .75-X,  .25-Y
SYMM    .75-Z,  .25-X,  .5+Y
SYMM    .25-Z,  .5+X,  .75-Y
SYMM    Y,  Z,  X
SYMM    .25-Y,  .5+Z,  .75-X
SYMM    .5+Y,   .75-Z,  .25-X
SYMM    .75-Y,  .25-Z,  .5+X
SYMM    .75+Y,  .25+X,   .5-Z
SYMM    -Y,  -X,  -Z
SYMM    .25+Y,  .5-X,  .75+Z
SYMM    .5-Y,  .75+X,  .25+Z
SYMM    .75+X,  .25+Z,  .5-Y
SYMM    .5-X,  .75+Z,  .25+Y
SYMM    -X,  -Z,  -Y
SYMM    .25+X,  .5-Z,  .75+Y
SYMM    .75+Z,  .25+Y,  .5-X
SYMM    .25+Z,  .5-Y,  .75+X
SYMM    .5-Z,  .75+Y,  .25+X
SYMM    -Z,  -Y,  -X
SFAC AL3+ 6.4202  3.0387  1.9002  .7426  1.5936  31.5472  1.9646  =
   85.0887  1.1151   .056  .052  227  1.25  26.9815
SFAC Cr+3 10.6406  6.1038  7.3537  .392   3.324   20.2626  1.4922  98.7399 =
   1.1832  .284  .624  2890  1.24  51.996
SFAC MG+2  3.4988 2.1676 3.8378 4.7542 1.3284 .185 .8497 =
   10.1411  .4853   .0420  .0360  165.  1.60  24.305
SFAC FE+2  11.0424  4.6538  7.374  .3053  4.1346 12.0546  .4399 =
   31.2809  1.0097  .3010 .8450  3490.  1.24   55.847
SFAC O-2    2.5371  5.7271  4.3991  17.17999  1.9535  .2189  1.2957  =
   44.606  -.205  .0080  .0060  32.5  .66  15.9994
UNIT 1 1 1 1 1
LIST 6 
OMIT 3   3   7
OMIT     7   7   7
BOND 0.5
L.S. 8
ACTA
EXYZ ALM CRM
EXYZ MGT FET
EADP ALM CRM
EADP MGT FET
SHEL 999 0.4
SUMP 1.000 0.001 1 2 1 3
SUMP 1.000 0.001 1 4 1 5
WGHT    0.025400    3.781100
EXTI    0.007571
FVAR       1.11746   0.07930   0.92072   0.58206   0.41793
O     5    0.262044    0.262044    0.262044    10.16666    0.00482    0.00482 =
         0.00482   -0.00031   -0.00031   -0.00031
ALM   1    0.500000    0.500000    0.500000    20.08333    0.00310    0.00310 =
         0.00310   -0.00033   -0.00033   -0.00033
CRM   2    0.500000    0.500000    0.500000    30.08333    0.00310    0.00310 =
         0.00310   -0.00033   -0.00033   -0.00033
MGT   3    0.125000    0.125000    0.125000    40.04170    0.00557    0.00557 =
         0.00557    0.00000    0.00000    0.00000
FET   4    0.125000    0.125000    0.125000    50.04170    0.00557    0.00557 =
         0.00557    0.00000    0.00000    0.00000

HKLF  4


REM    Oli_Chr_1_cromite
REM R1 =  0.0205 for     180 Fo > 4sig(Fo)  and  0.0205 for all     180 data
REM     12 parameters refined using      2 restraints

END

WGHT      0.0260      3.5388

REM Highest difference peak  1.112,  deepest hole -1.278,  1-sigma level  0.167
Q1    1   0.3750  0.3750  0.3750  10.04167  0.05    1.11
Q2    1   0.5000  0.4495  0.5505  10.50000  0.05    0.79
Q3    1   0.2348  0.2348  0.2348  10.16667  0.05    0.67
Q4    1   0.2443  0.2343 -0.0214  10.20000  0.05    0.61
Q5    1   0.5684  0.5684  0.5023  10.50000  0.05    0.60
Q6    1   0.4577  0.5312  0.5312  10.50000  0.05    0.49
Q7    1   0.0588  0.0588  0.1222  10.50000  0.05    0.47
Q8    1   0.3570  0.1091  0.3570  10.50000  0.05    0.37
Q9    1   0.5389  0.5389  0.5389  10.16667  0.05    0.35
Q10   1   0.3750  0.2716  0.3750  10.25000  0.05    0.28
Q11   1   0.2058  0.2058  0.0442  10.16667  0.05    0.23
Q12   1   0.3392  0.2444  0.1897  11.00000  0.05    0.18
Q13   1   0.3063  0.1132  0.2174  11.00000  0.05    0.17
Q14   1   0.2765  0.1747  0.1747  10.50000  0.05    0.16
Q15   1   0.3244  0.1451  0.3244  10.50000  0.05    0.15
Q16   1   0.2908  0.1313  0.2908  10.50000  0.05    0.14
Q17   1   0.1888  0.3593  0.2195  11.00000  0.05    0.14
Q18   1   0.2298  0.2297  0.1780  10.50000  0.05    0.14
Q19   1   0.1864  0.1230  0.0077  11.00000  0.05    0.14
Q20   1   0.3783  0.3125  0.1937  11.00000  0.05    0.13
;
_shelx_res_checksum   72900

_shelx_hkl_file
;
  -1  -1   1 11070.0 87.7994   4
   1  -1   1 12929.0 94.9595   8
   1   1   1 12092.0 106.526  43
   1   1   1 13420.4 94.9326   8
   1   1   1 15504.6 109.502   6
   1  -1  -1 13905.5 93.5898   1
  -1  -1  -1 12629.0 94.7035   3
  -1   1  -1 15162.4 89.9004   7
  -1  -1   1 13409.9 104.915   3
   1   1  -1 12802.3 93.7904   2
  -1   1  -1 14107.5 99.5307  44
  -1   1   1 13783.5 103.115   7
   1   1  -1 12390.1 96.5516   1
  -1   1   1 14062.0 95.3397   5
   1  -1   1 13777.4 98.7821   4
   1   1  -1 11161.6 93.6301   9
   1  -1  -1 12542.0 102.157   9
  -1   1  -1 12020.6 82.4725   9
  -1   1  -1 13863.0 99.3862   2
   1  -1  -1 13256.4 99.2359   4
  -1  -1  -1 13991.7 86.2585   4
   0   2   0 4.74192 3.23576   2
   0   2   0 213.230 9.77025  44
  -2   2   0 15796.5 134.284  44
   2   2   0 16530.1 144.278  43
   2   0  -2 16711.4 137.250   1
   0   2  -2 15329.6 127.942   2
  -2   0   2 16382.8 110.574  44
  -2   0  -2 18118.9 115.931   3
  -2  -2   0 15603.9 126.212   7
  -2   0  -2 14836.6 120.944   7
   2  -2   0 18269.8 119.553   3
   2   0  -2 16669.5 109.187   2
  -2   0   2 16315.7 111.484   6
   2   2   0 14645.3 132.698   1
  -2   2   0 17159.3 123.276   2
  -2   0  -2 15586.7 131.444  10
   2   2   0 14277.2 112.854   5
  -2  -2   0 15678.6 128.822   3
  -2   0  -2 18390.0 131.828  44
  -2  -2   0 16635.8 104.515   4
   2   0  -2 15600.6 131.155   9
   2   0   2 16164.2 125.645   8
  -2   0   2 17337.8 102.008   5
   2  -2   0 13301.1 124.644   4
   0  -2  -2 17783.8 135.491   4
  -2   2   0 16234.2 131.117   7
  -2   0   2 17986.4 103.529   8
   0  -2  -2 16571.4 104.228   1
   0  -2   2 17261.1 137.772   4
   0   2  -2 16610.1 124.098   9
   0   2  -2 17131.6 119.648  44
   0   2   2 16750.1 134.263   5
  -2   0   2 15773.3 144.019   3
   0   2   2 20885.3 160.340   6
   2   2   0 16431.5 143.056   2
   0   2   2 15311.8 116.356  44
   2  -2  -2 10803.0 121.246   9
  -2  -2  -2 12252.3 95.4181   4
  -2  -2  -2 11083.7 106.964   3
  -2   2   2 11389.9 99.8987  44
   2  -2  -2 11301.4 104.534   1
  -2   2   2 12288.0 73.4238   2
   2   2   2 9294.11 123.066  43
  -2  -2  -2 11022.7 104.368   7
   2   2  -2 10750.3 112.178   1
   2  -2   2 11421.0 85.7452   3
   2   2   2 11444.9 108.947   8
   2  -2  -2 10101.3 108.954   4
  -2  -2   2 10945.0 120.307   3
   2  -2   2 9990.04 128.622   6
  -2   2  -2 11660.4 113.174  44
  -2   2  -2 12338.0 116.034   2
   2   2  -2 11398.2 113.917   9
  -2   2   2 11667.3 108.557   5
  -2   2   2 10713.6 99.8163  43
   2  -2   2 10560.8 106.052   8
  -2   2   2 11061.0 118.602   7
   2   2  -2 10819.2 105.772   2
  -2  -2   2 10531.5 99.2464   7
   1   3   1 46843.2 297.874   5
   1  -3   1 45670.4 299.469   4
   3   1  -1 45217.8 278.705  43
   3  -1   1 51656.6 309.350   6
  -1  -1   3 53512.2 291.966   8
  -3   1   1 43962.3 304.932   7
   3   1   1 47332.1 282.444   8
  -1  -1   3 49733.3 272.144   7
  -1   1   3 46187.1 270.259   8
   1   3  -1 42453.6 276.970   1
  -3   1  -1 47429.7 300.046   7
  -3   1   1 46564.6 266.635   2
   3   1  -1 43859.3 293.327   2
  -1   1   3 50374.7 286.582   5
  -1   3   1 43989.8 297.593   7
  -1   3   1 47905.7 314.025  43
   3  -1   1 40665.1 262.626   9
   3   1   1 41280.7 317.723   1
  -1   1  -3 49079.9 279.364  44
   1   1  -3 52616.2 279.613  10
  -1  -3  -1 43706.2 285.413   4
  -1   1  -3 46772.2 252.699   7
  -1  -1   3 41135.6 312.483   3
  -3  -1  -1 40687.1 269.027   3
  -3  -1  -1 41462.8 275.586  10
   1  -1   3 44998.7 325.860   6
   1   3  -1 46793.3 302.215   2
  -1   3  -1 45023.6 275.509   1
  -3   1   1 40273.7 282.269   3
   1  -3  -1 45823.3 305.796   4
   1   3   1 44642.6 264.247   1
   3  -1  -1 43634.7 286.084   4
   1   3   1 46111.4 328.908  43
   1  -1  -3 44787.7 279.623   1
  -1  -1   3 44643.4 305.856   6
  -1   1   3 46230.3 297.121   6
  -1   3  -1 47113.8 297.710  44
   1  -1   3 45903.6 294.449   8
   3  -1   1 46063.8 272.676   8
   1   1   3 46462.7 289.143   8
  -1  -1  -3 46635.8 269.329   9
  -1   3   1 50065.4 283.007   2
  -3  -1   1 47376.4 304.204   3
   3   1   1 43760.1 262.183   9
   1   3  -1 46883.6 287.705  44
   1  -1  -3 45027.1 293.935   9
  -1   1  -3 47064.8 301.822  10
  -1   1  -3 51741.9 302.630   2
  -1   3  -1 42800.8 289.530   2
  -3  -1  -1 43446.1 293.604   7
   1  -3   1 44072.2 274.796   3
   1  -1  -3 43769.5 248.638   2
   1  -1  -3 47451.6 292.859   4
  -1  -3   1 49809.2 272.724   7
   1   1  -3 46031.2 294.774   1
   1   1  -3 46060.9 274.479   2
   1   1  -3 46024.1 292.174   9
  -1   1  -3 42949.0 261.963   9
   1  -1   3 40713.0 284.305   3
  -1  -3   1 46478.0 296.831   3
  -3  -1   1 40058.9 294.969   7
  -3   1  -1 49192.5 304.534  44
   3  -1  -1 41325.2 304.631   1
   1   3  -1 46130.0 289.359   9
   3   1  -1 46705.1 320.876   1
  -1   3  -1 46056.9 275.910   7
  -1   1  -3 42762.8 297.542   1
  -1  -3  -1 43282.2 291.456   3
  -1   1   3 47784.5 247.850  44
  -1  -3   1 45956.8 285.395   4
   3  -1   1 49015.1 282.721   4
   3   1   1 57192.5 301.284   6
   1   1   3 50456.2 327.070   6
   1   3  -3 957.420 31.9066   9
  -3   1   3 1170.23 27.8681   6
  -3  -1  -3 1229.54 30.1489   3
  -1  -3   3 1030.21 20.2649   7
  -3  -1  -3 1158.07 32.6290  44
   3   3   1 767.002 26.4903   5
   1  -3   3 995.208 34.8938   4
  -1   3   3 1251.70 42.6227   6
   3  -3   1 1020.15 19.8411   3
   3   1  -3 965.279 15.6230  10
  -1  -3  -3 1248.63 39.7783   3
  -1   3  -3 805.986 24.4445   9
  -3  -1   3 1031.92 40.3401   3
  -3   1   3 963.463 15.6733   8
   1  -3  -3 1054.99 35.3426   4
   3   1  -3 959.844 35.1952   1
  -3   1   3 1114.36 25.8231   5
  -3  -3   1 1041.34 36.1128   3
   3   3   1 996.758 27.8268   9
   3   1   3 1023.51 31.9381   8
  -3   1  -3 1193.20 34.7970  44
   1   3   3 863.158 31.8207   5
  -1   3   3 975.381 26.2042  44
  -3  -3   1 906.434 22.1003   4
   3   1  -3 965.264 27.2306   2
   1  -3   3 889.696 29.0950   3
   3  -1  -3 1022.32 35.7884   1
  -3   1  -3 1214.06 38.7473  10
   1   3   3 975.192 31.0281   8
  -3  -1  -3 865.893 29.6731  10
  -3  -1   3 851.580 30.1443   7
   3   3  -1 797.609 20.7166   5
  -1  -3   3 771.300 29.4395   4
  -1  -3  -3 1118.67 33.0759   4
   3   3  -1 909.995 35.2607   2
   3  -1   3 982.862 32.0129   4
  -1   3  -3 1144.18 32.1265  44
   3   3  -1 966.101 37.5959  43
   3  -3  -1 914.663 33.0634   1
  -1   3  -3 1047.43 34.1244   2
   3   3   1 886.259 39.0101  43
   3  -3   1 951.315 33.8249   4
  -3  -3  -1 1034.58 32.0939   7
  -3   3   1 1003.86 36.0938   7
   1   3  -3 956.586 33.4364   2
   3  -1  -3 1056.74 31.8565   4
   3   3   1 985.896 36.3879   1
   3  -1   3 1068.23 32.5068   8
  -3   3   1 932.813 24.0868   2
   3   3  -1 995.916 36.8242   1
   3  -1  -3 1027.48 35.6302   9
   1   3   3 1187.00 43.7651   6
   1   3   3 1075.22 43.8242  43
   1   3  -3 1021.88 26.3252  44
   3   1   3 1749.02 49.6600   6
  -3   1  -3 1125.48 36.1036   2
  -1   3   3 973.146 27.4009   8
  -3   1   3 939.370 24.3258  44
  -3   1  -3 1192.55 31.7705   7
  -3  -1   3 1049.42 24.1714  44
  -3  -3   1 887.914 29.5086   7
  -3   3  -1 1166.03 37.4374  44
  -1   3   3 931.238 36.4099  43
  -3   3  -1 1209.56 34.5761   2
  -3  -1   3 1220.20 24.9949   8
  -3  -3  -1 944.263 32.6219   3
  -3  -1  -3 949.722 29.4035   7
  -1   3  -3 1101.79 33.9670   1
   3   1  -3 1050.44 34.9239   9
  -3   3  -1 1081.90 31.6962   7
  -3   3   3 20754.8 169.361  44
   3  -3  -3 20787.9 210.742   9
  -3   3   3 18371.6 117.848   2
  -3  -3   3 19948.8 203.460   3
  -3  -3   3 20774.7 169.165   7
   3   3   3 15359.6 206.208  43
  -3   3   3 20059.5 202.699   7
   3   3   3 24847.7 230.236   6
   3   3  -3 22851.3 203.228   9
   3  -3   3 19529.9 181.960   8
  -3   3  -3 24011.4 203.191  44
  -3  -3  -3 20016.7 179.202   3
  -3   3   3 18276.2 166.493  43
  -3  -3  -3 20322.0 179.752   7
  -3   3  -3 23578.2 203.177   2
   3   3   3 21097.7 190.152   8
   3  -3   3 20956.2 139.537   3
   3   3  -3 20914.7 192.044   2
  -3   3   3 22729.2 187.976   5
   3  -3   3 21119.2 195.951   4
   0   0  -4 107358. 534.852   2
  -4   0   0 94057.1 549.528  44
   0   0  -4 97469.9 527.857   9
   0   0  -4 102437. 547.923   1
   4   0   0 88489.3 523.089   9
   0   0   4 88605.8 571.409   6
  -4   0   0 90055.1 561.301   7
  -4   0   0 89521.5 519.732   3
   0   4   0 96903.8 546.450  44
   0   0  -4 104959. 545.616  10
   0  -4   0 86294.3 545.774   4
   0   4   0 78741.2 487.493   1
   4   0   0 101768. 505.663   8
   4   0   0 84102.6 492.898   4
   4   0   0 79643.8 577.993   1
  -2   0  -4 158.843 12.0180  44
  -4   2   0 13.5085 7.46122  44
   0  -4   2 14.4007 9.38591   4
  -4  -2   0 1.74814 9.01438   7
  -2   4   0 9.20102 6.12283   2
   2  -4   0 7.57375 12.6938   4
  -2  -4   0 29.1117 7.24706   7
   2  -4   0 539.065 21.1047   3
  -2   0  -4 73.2208 10.9257  10
   4  -2   0 87.9087 17.3862   1
   0   4   2 0.31717 6.57676   5
  -4   2   0 3.90228 5.28211   2
   0   2  -4 218.143 15.2883   2
   2   0   4 28.2487 10.7094   6
  -4   0   2 683.075 24.1182  44
   0   2   4 9.18021 8.24646   6
  -2   4   0 42.1876 9.23512   7
  -2  -4   0 62.0379 13.0098   3
   0   4  -2 96.9867 10.9984  44
  -4   0  -2 38.4802 10.7309   7
  -2   4   0 4.63354 6.49009  44
   0   4  -2 106.728 9.89061   1
   0  -4  -2 9.45747 12.3401   4
   4   0   2 130.640 11.4695   8
   0  -2  -4 24.1393 5.36910   1
   2   4   0 24.0047 10.8634   2
   2   4   0 64.4110 17.9982  43
  -2   0   4 42.6668 12.8295   3
   4   0  -2 7.69876 5.68395   4
  -4  -2   0 12.1843 11.0641   3
   0   4   2 46.4134 10.1593   2
   0  -4   2 375.745 22.3673   3
  -4   0   2 138.361 15.6019   3
   4   0   2 36.8965 10.4579   6
   2   0   4 959.966 31.1589   8
  -2  -4   0 144.877 13.3605   4
   4  -2   0 17.3034 7.84648   9
  -4   2   0 140.297 14.7828   7
   4   0   2 14.5420 3.20563   9
   0   4   2 77.2518 9.99973  44
  -4  -2   0 3.56001 4.03016  10
  -2   0  -4 5.74549 4.69132   7
  -2   0  -4 144.265 13.8994   2
   4  -2   0 18.3594 12.3561   4
   0  -2   4 15.1951 9.07593   3
   0  -4  -2 9.43095 10.2964   3
   0  -2  -4 64.4931 9.71366   4
   0   4  -2 8.34606 7.67834   9
   0  -2   4 0.83768 9.41872   6
   2   0  -4 14.2768 7.87956   9
  -2   0   4 120.221 13.2024   6
   2   4   0 8.61736 7.11067   5
   0   2  -4 159.430 13.4782   9
   0  -2  -4 105.765 12.4786   9
   4   2   0 18.5766 8.12420   9
  -4   0  -2 138.702 13.7535  10
   2   4   0 157.647 15.0095   1
   4   2   0 11.3140 8.79470  43
   0   2  -4 29.7639 7.87461   1
  -2   0   4 149.424 13.0206   7
   2   0  -4 13.9292 7.80490   1
   4   0  -2 1.13586 12.4629   1
   0   2   4-1.89413 4.81846   8
   0   4  -2 152.409 14.8696   2
  -2   0   4 18.5074 5.44344   8
  -4   0  -2 9.01475 6.40200  44
   0   2  -4 111.632 8.20127  44
  -2   2   4 9113.73 112.728   6
  -2  -4  -2 9732.52 106.385   4
  -2   4   2 9066.52 119.704   7
   2  -4  -2 11234.1 126.098   3
   2  -2  -4 9192.67 100.364   1
   2   2  -4 8837.59 113.855   1
  -2   4   2 9867.42 93.9416   2
   4  -2   2 9444.85 129.460   6
   2  -2  -4 9034.58 112.002   4
  -2  -2   4 8816.09 116.095   6
  -4  -2  -2 7057.01 91.2831  10
  -4   2   2 8610.94 105.275  44
  -2  -4   2 8128.56 97.1275   4
  -2   4   2 9110.04 117.214  43
  -4  -2   2 8970.55 119.528   3
   2  -2   4 8477.73 135.800   6
  -2   4   2 9209.74 107.974  44
  -2  -4   2 9383.61 120.987   3
   2  -4   2 8805.28 93.3322   3
  -4   2   2 7902.33 114.069   7
   4   2  -2 8780.69 127.773   1
   4   2   2 10284.9 125.370   6
  -2   4  -2 11288.2 115.196   1
   2   4   2 8322.56 137.623  43
  -2  -2  -4 10297.9 103.266   4
   2  -2   4 8612.07 110.408   8
  -2   4  -2 7888.62 106.822   2
   4  -2  -2 8158.66 113.919   1
  -2  -4  -2 8820.18 110.548   3
   4  -2   2 7887.21 86.1394   9
  -2   2  -4 10812.2 129.382   1
  -2   2   4 9227.42 79.1882  44
  -2   2   4 8486.17 112.852   7
  -2   4  -2 9956.74 118.845  44
   2   2   4 9221.20 129.764   6
  -2  -4   2 8213.37 88.7710   7
   4  -2   2 8659.34 99.0523   8
  -2   2  -4 10867.7 125.417   2
  -4  -2  -2 8760.67 97.1298   3
   2   4   2 7471.92 105.231   5
  -2  -2   4 10175.8 106.841   8
   2   2   4 8932.79 106.963   8
  -2   2  -4 11087.0 113.082  44
   4   2  -2 7971.98 107.064   2
   4  -2  -2 9350.50 114.139   4
  -2  -2   4 8735.23 131.302   3
   2  -4   2 9627.96 120.715   4
  -2  -2   4 8759.68 87.2128   7
   2   2  -4 8826.75 112.385   9
   4  -2   2 10025.4 110.730   4
  -4   2  -2 10197.7 122.187  44
   2   2  -4 9208.04 101.359   2
   4   2   2 10175.7 112.972   8
   2   4  -2 8693.62 115.981   2
   2   4   2 7870.92 117.792   2
  -2   2   4 9807.04 106.246   5
  -2   2   4 8163.84 83.3144   8
   2  -4  -2 9888.21 126.437   4
  -2  -2  -4 11309.7 123.835   3
   2   4  -2 9243.45 111.798   9
  -4   2  -2 11181.0 118.049   7
   2   4  -2 8894.44 107.819   1
  -4  -2   2 9369.40 114.257   7
  -4  -2  -2 8314.86 106.757   7
   2  -2  -4 9733.63 123.059   9
   2  -2   4 7700.96 92.4419   3
  -4   2   2 9175.19 76.6665   2
   4   2   2 8699.43 78.8390   9
  -4   0  -4 134448. 791.864   7
   4   0   4 135348. 864.234   6
   0  -4  -4 142587. 847.606   3
  -4   0  -4 165631. 826.910  44
   4   0   4 132214. 805.582   8
   4   4   0 136797. 849.665   1
  -4   0  -4 146408. 834.340   2
   0   4  -4 155452. 804.709   9
   0  -4   4 146262. 830.869   3
  -4   0   4 130497. 755.425  44
   4   4   0 153308. 889.553  43
  -4   0  -4 152377. 835.698  10
  -4   4   0 150419. 844.297   7
   4   4   0 149392. 811.450   9
   4  -4   0 122976. 813.004   4
   0   4   4 138937. 832.842   5
   0   4  -4 140191. 811.790   1
  -4  -4   0 136646. 809.250   7
  -4   0   4 151709. 729.828   8
   0   4   4 171388. 903.409   6
   0   4   4 121054. 858.195  43
   0   4   4 130627. 794.821   8
  -4   4   0 144572. 837.881  44
   0   4  -4 145128. 789.588  44
   4   0  -4 141531. 796.989   4
   4   0  -4 156324. 867.457   1
   4   4   0 128856. 851.278   2
  -4  -4   0 128243. 806.392   3
   4   0  -4 150619. 842.027   9
   0  -4  -4 146048. 825.268   4
  -4   4   0 125109. 783.962   2
   0  -4   4 145242. 835.548   4
   0   4  -4 139791. 833.386   2
   4  -4   0 139709. 760.681   3
  -4   4   2 116.146 18.1727   7
   2   4  -4 108.870 16.9863   2
   4   2   4 143.994 21.0981   6
  -4   2   4 132.244 13.7331   5
   4  -2   4 131.945 22.6017   6
  -2   4   4 110.360 18.0203   5
  -2   4   4 148.522 14.9922  44
  -4   4   2 110.557 10.4092   2
  -4   4   2 133.857 16.1339  43
   2  -4   4 207.943 28.1875   6
  -4   4  -2 127.581 15.8362   2
   2  -4  -4 424.031 35.9452   9
  -2   4  -4 156.467 17.4923   1
   4   2  -4 115.821 18.3512   9
  -2  -4  -4 148.856 17.1125   4
   2  -4  -4 132.571 21.4978   4
   4   4   2 115.636 22.8274  43
   2  -4   4 130.993 19.2791   4
  -4   2  -4 149.098 17.3713   2
  -2  -4  -4 167.123 20.1945   3
  -4  -4   2 105.742 19.5208   3
  -4  -4   2 148.276 17.4757   7
  -2   4   4 83.8384 21.1341  43
  -2   4  -4 150.476 16.5520  44
  -4  -2  -4 215.943 18.1076  44
   4  -2  -4 133.089 18.7269   9
   4   4  -2 140.310 23.4241   1
  -4  -4  -2 230.902 22.3933   3
   4   2  -4 157.821 21.8653   1
   4   2   4 129.586 15.0025   8
   4  -2   4 154.836 16.8786   8
   4  -4   2 118.699 14.3161   8
  -2   4  -4 153.842 18.1419   2
   4   4  -2 125.449 19.5118   2
   4   4  -2 117.155 24.1870  43
  -4   4   2 105.087 14.9289  44
  -4  -4  -2 170.342 17.6972   7
   4  -2   4 105.397 16.7700   4
  -4  -2   4 122.826 20.6411   3
   2  -4   4 140.467 16.7860   3
   4   4   2 135.239 20.8478   1
   2   4   4 147.354 21.9690   6
  -2  -4   4 240.793 13.6867   7
   4  -4  -2 111.505 21.4187   4
   4   4   2 139.444 15.2096   9
   4  -4   2 142.656 20.8572   4
   2  -4   4 380.400 25.3261   8
  -4   2   4 117.246 12.1798  44
   2   4  -4 104.323 17.6897   9
  -4   2  -4 138.164 16.6270  44
  -4  -2   4 138.991 16.4434   7
   4  -2  -4 141.449 20.5222   1
   4  -2  -4 154.493 18.5406   4
  -4   4  -2 279.828 23.6791  44
   2   4   4 119.752 15.1240   8
   2   4   4 134.554 25.3256  43
  -4  -2  -4 137.408 16.0522   7
  -4  -2  -4 116.471 15.1477  10
   2   4  -4 108.882 16.6500   1
   4  -4   2 124.972 8.34787   3
   4   4  -4 41468.7 364.089   1
  -4   4  -4 42217.8 347.383   2
   4   4   4 42203.3 343.058   8
  -4  -4  -4 38811.2 314.464   3
  -4  -4   4 39583.6 354.227   3
  -4   4  -4 46091.1 353.085  44
   4  -4   4 40905.1 346.531   4
  -4   4   4 40307.2 303.687  44
  -4   4   4 44722.5 334.448   5
   4  -4  -4 40708.9 351.344   4
   4  -4   4 37897.9 383.643   6
  -4   4   4 35712.8 346.195   7
  -4  -4   4 43574.4 306.179   7
   4  -4  -4 43258.5 373.224   9
  -4  -4  -4 39722.1 321.093   7
   4   4  -4 40085.9 339.707   2
   4   4   4 48047.9 403.232   6
   4   4  -4 48578.5 368.699   9
   4  -4   4 35933.2 319.064   8
   5  -1   1 41820.7 375.174   1
  -1   1  -5 49868.6 335.816  10
   1   5  -1 41353.7 314.162  44
  -5  -1   1 44899.4 320.289   3
  -1   1  -5 49154.8 336.992   1
  -5   1   1 44201.7 325.607  44
   1   1  -5 50351.3 336.131   1
   1  -1   5 45772.7 327.379   8
   1   5  -1 45123.3 293.495   1
  -1   5   1 46225.7 364.966  43
   1   1  -5 44798.3 296.543   2
  -1  -5  -1 48549.4 343.182   3
   5   1  -1 46494.1 261.161   4
  -1   5   1 39570.1 314.325  44
  -1   1  -5 55749.8 342.600   2
  -1  -1  -5 46826.3 318.274   1
   1  -5  -1 44540.4 321.238   3
   1   5   1 45168.0 335.335   5
  -5  -1   1 51158.5 351.436   7
   5   1   1 40652.9 367.120   1
  -5  -1  -1 46428.2 338.394   7
   1   5   1 45542.7 348.323   2
   5   1   1 44658.7 288.438   9
  -1   5   1 50447.4 328.322   2
   5  -1  -1 40225.7 358.974   1
   1  -1  -5 46456.4 314.425   1
  -1   5   1 47552.9 347.268   5
   1   1  -5 47294.8 311.425  10
  -1   5  -1 42164.6 275.275   1
  -1  -1   5 38062.8 335.178   6
  -1  -1  -5 52614.4 325.242   2
   1  -5   1 36637.5 296.787   3
   5   1   1 52997.9 310.575   8
   5  -1  -1 41941.2 312.284   9
  -1   1   5 40182.1 338.991   6
   1  -1  -5 44789.4 317.421   9
   5  -1   1 45475.0 293.415   4
  -5   1  -1 43787.1 313.923   2
  -1  -5  -1 40905.7 315.306   4
   1   5  -1 48351.0 328.894   9
   1   1  -5 45732.2 318.509   9
   1  -5   1 43332.4 331.585   4
   5  -1   1 39613.7 278.855   9
   5   1  -1 42338.5 370.210   1
   1  -5  -1 42261.8 331.772   4
  -5  -1   1 45697.4 319.400  44
   1   5   1 47114.3 383.738  43
   1   5   1 41715.1 259.266   1
   1   1   5 42608.6 360.016   6
   5  -1  -1 52782.1 267.817   6
   1   5  -1 42847.4 336.255   2
  -5   1   1 44453.3 347.877   7
   5   1  -1 44282.9 322.060   9
   5  -1  -1 44125.7 295.307   4
  -1  -5   1 43815.5 317.352   4
  -5  -1  -1 46872.9 304.332  10
  -1   1   5 45407.3 301.400   8
  -5   1  -1 47689.5 340.853   7
  -1   5  -1 40614.0 320.448  44
   5  -1   1 47407.6 315.143   6
  -1  -1   5 47153.9 315.327   8
  -1  -1   5 45514.9 281.001   7
  -5  -1  -1 46860.6 327.115  44
  -5   1  -1 47505.6 337.366  44
   1  -1   5 39270.3 358.057   6
   5  -1   3 3815.14 86.0450   6
   5   1   3 4544.81 91.3348   6
   5   1  -3 3699.37 58.3791   4
  -1   5  -3 3823.24 70.1448   9
   1   3   5 4730.77 99.8317   6
  -1   3   5 3543.91 74.6648   5
   1   5  -3 4247.35 73.5059  44
   3   1   5 3799.02 94.3761   6
  -5  -1  -3 3488.11 72.9771   7
   1  -5   3 4064.50 75.3962   3
   3   5   1 4058.91 107.934   1
  -3  -1  -5 3396.80 74.4382  10
  -3   1   5 3910.29 79.8958   7
  -3   5   1 4218.83 71.5034   2
   1  -3  -5 4035.86 78.9974   4
  -1   5  -3 4070.51 70.6415   1
  -5  -1   3 4238.62 92.4980   3
   3  -5  -1 3858.32 83.5823   4
  -3   1   5 4327.94 41.5959  44
  -5   1  -3 4272.23 83.3863  44
   5  -1   3 3669.82 67.2391   4
  -1  -5   3 3806.77 75.8857   4
   5  -3   1 4171.46 88.3779   6
  -1   3   5 3767.80 85.8061   6
  -5   1   3 4499.59 56.4277   5
  -3  -1  -5 4764.03 73.5826  44
  -1   3   5 3842.39 65.0221   8
   1  -5  -3 4272.83 88.1074   4
  -5   3  -1 4279.12 85.2603  44
  -3   5   1 3970.45 82.6576   7
   5  -3   1 3573.31 68.9119   9
   5   1  -3 3719.64 89.7939   1
   1   5  -3 3825.02 71.5170   1
   5  -3  -1 3618.54 73.6811   4
  -3  -1  -5 4475.03 83.8035   2
  -3   5  -1 3395.03 70.7607   2
  -3  -5  -1 7962.03 117.015   3
   3   1  -5 3945.84 55.4131  10
   1  -3   5 3438.90 94.4862   6
  -3  -1   5 4542.75 64.3450   8
   3   5  -1 3954.56 96.2302  43
  -5  -3  -1 3782.14 70.6030   3
   1   5   3 3099.15 74.7740   5
  -3  -5  -1 4913.29 84.6261   7
   1  -3   5 3844.39 78.5798   8
   1   5   3 3432.66 77.7194   2
   3   5   1 6439.01 99.0094   9
  -5   3  -1 4690.75 85.4858   7
   3  -1   5 4983.81 108.684   6
   3  -5   1 3897.00 59.9580   3
  -5   1   3 2997.59 73.9746   3
   3   5   1 4451.68 81.5651   5
  -3  -5   1 3923.51 80.3205   3
  -5  -1  -3 4110.12 79.6164  44
  -5  -3   1 4266.34 82.8374   3
  -3   1  -5 4072.89 84.0992  10
   5  -3  -1 3936.80 82.3625   9
   1   3  -5 4266.52 79.3000   2
  -1   5   3 4483.25 74.1451   2
  -1   3  -5 4189.32 81.8001   2
   3   1  -5 4060.96 82.0399   9
   5  -1  -3 3822.88 87.2830   1
  -1   5   3 4143.13 97.1476  43
  -5  -1  -3 3358.98 70.0247  10
  -3   1  -5 4449.43 86.8637   2
   1   3  -5 4515.80 85.2283   1
   1  -3  -5 4216.24 84.7443   9
   1  -5   3 3703.09 79.1846   4
  -5   3  -1 4237.81 75.1243   2
  -1  -5   3 4084.96 83.6676   3
  -1  -3   5 4063.57 36.0904   7
  -3  -1   5 3358.63 38.0503  44
  -3   1  -5 4608.11 75.7836  44
   5   3   1 3803.82 92.9277   1
  -3  -5   1 3844.61 68.5588   7
  -1  -5  -3 4354.54 84.3037   4
   3  -5  -1 4470.71 75.7084   3
   5   3  -1 4616.15 84.2594   9
   5  -1   3 4005.68 71.0172   8
   5   1   3 4341.33 78.1347   8
  -3   5  -1 4110.76 75.7818   7
   3  -1  -5 4052.50 77.3728   1
   3  -1  -5 3876.81 80.4339   9
  -5  -3   1 3887.51 78.4376   7
  -5  -1   3 3920.03 65.8936  44
  -5   1   3 3641.55 67.3741  44
  -1  -3   5 4233.83 78.5241   8
  -1   5   3 4041.46 85.1291   5
   5  -3  -1 3774.43 88.2149   1
  -3  -1   5 3031.10 83.1276   3
  -3   1   5 4107.82 53.3918   8
  -5   3   1 4014.54 81.2945  44
  -5   1  -3 4473.48 79.9005   7
   3  -1  -5 3687.89 73.7103   4
  -5   1  -3 4137.18 80.3294   2
  -3  -1   5 4037.43 72.9486   7
   3   5   1 4472.60 126.061  43
  -1  -3   5 3855.30 90.9913   6
   3   5  -1 3723.81 87.6602   2
   5   3  -1 3473.66 88.4743   1
   5  -1  -3 3936.69 70.2290   4
  -5  -1   3 4469.38 87.5103   7
   3   5   1 4080.96 102.846   2
   1   5  -3 3712.21 81.6531   2
  -5   3   1 3477.09 80.5225   7
   5   3   1 3074.51 80.1515  43
  -1  -3   5 3628.77 87.5292   3
   5   3   1 3682.37 63.7805   9
  -1  -5  -3 4379.79 87.0334   3
   3   1  -5 4183.35 83.4543   1
   3  -5   1 3784.00 82.4335   4
   1   3  -5 4055.83 75.6454   9
   5  -3   1 3730.92 73.6862   4
  -5  -3  -1 3734.09 76.8966   7
  -1  -5   3 3961.48 50.5972   7
  -1  -3  -5 4279.07 76.9162   4
   1  -3   5 3479.14 75.3322   3
  -1   5  -3 5583.19 98.8745   2
  -5   3   1 4076.06 62.1970   2
   3  -1   5 3738.27 74.8083   8
   1   5  -3 4037.30 76.6414   9
  -3   5  -1 4411.13 85.3608  44
  -3  -1  -5 3659.94 64.4713   7
  -1   5   3 3739.60 70.0796  44
   3   1   5 4068.66 78.6809   8
   3   5  -1 3981.16 78.9784   1
  -1   5  -3 3999.60 76.4482  44
  -5  -3   3 23668.5 244.960   3
   5  -3   3 22975.5 261.632   6
  -3  -3   5 28297.1 219.596   8
   3   3   5 23524.9 226.928   8
  -3   3  -5 28610.8 237.001  44
  -3  -5  -3 22578.2 223.856   3
  -3   3   5 22832.7 176.303   8
  -3   3  -5 27160.8 252.050   2
  -3   5   3 26322.8 240.638  43
   5   3  -3 20483.3 220.665   2
  -5   3   3 25959.2 213.981   5
  -3   5  -3 27830.3 248.314  44
   3  -3   5 20681.4 230.588   4
  -3  -3  -5 27558.4 237.516   3
  -5  -3  -3 22249.1 219.626   7
  -3  -5   3 23284.5 194.810   7
   3  -3   5 21731.9 271.118   6
   3  -3   5 22134.0 225.276   8
  -3   5   3 25368.3 243.121   5
   3   5   3 19894.0 269.441  43
   5   3   3 26941.4 240.539   8
  -3   5   3 22723.1 244.544   7
  -3   3   5 24680.3 218.429   5
   3  -5  -3 25166.0 251.619   4
   3  -5   3 23966.9 188.768   3
  -3  -3   5 24888.0 192.330   7
   3   3  -5 27518.6 249.508   9
   5  -3   3 22117.7 209.070   8
   5  -3   3 26213.3 235.419   4
   5  -3  -3 25089.3 239.742   4
  -3   3   5 26026.3 183.593  44
  -3   5   3 30148.9 197.280   2
  -5  -3  -3 17640.6 192.916  10
  -3  -5   3 24626.9 248.121   3
  -5  -3   3 25387.7 227.720   7
   5   3   3 30061.8 277.736   6
  -3  -3   5 25204.5 274.312   3
   3   5  -3 23636.2 249.696   2
  -3   3   5 22668.4 239.871   7
   3   3  -5 25555.7 247.500   1
   3  -3  -5 26179.7 259.517   9
  -3  -5  -3 26096.6 226.999   7
   3   5  -3 26108.3 241.517   9
   3   5  -3 25278.8 243.716   1
  -3  -3  -5 23513.2 213.138   7
  -3   5  -3 31966.0 251.727   1
   3  -5  -3 27644.2 245.968   3
   3   5   3 18585.7 213.265   5
  -5   3   3 20361.1 241.472   7
  -5   3   3 20789.3 206.938  44
  -5  -3  -3 22812.9 207.381   3
  -5   3  -3 25771.4 246.476  44
  -3   5   3 25094.7 221.684  44
  -5   5   1 6075.98 111.845  44
   5   1  -5 6261.86 125.334   1
  -5   5   1 5927.15 115.930   7
   5  -1  -5 6230.27 119.907   9
   5   5  -1 5623.98 125.773  43
   1   5  -5 5815.41 111.642   2
   1  -5   5 7044.65 148.053   6
  -1  -5   5 6347.94 117.052   3
  -1   5  -5 5231.97 88.7631   9
  -5  -1   5 4589.37 114.073   3
  -5  -1  -5 5452.90 94.1185   7
  -1   5  -5 6207.67 110.299   1
   5   1   5 6099.81 107.760   8
  -5   1  -5 6870.85 118.226   2
   5  -1   5 5423.17 126.177   6
  -5   1  -5 7013.23 113.020  44
   1  -5   5 5570.87 110.991   4
  -5  -5   1 5872.63 101.828   7
  -5   5  -1 6733.85 120.095  44
  -1  -5   5 7121.14 138.593   6
  -1   5   5 5303.93 120.141  43
  -1   5   5 5687.00 111.271   5
   5   5   1 6111.26 120.451   1
   1   5   5 4856.49 126.915  43
  -5  -5  -1 5975.29 106.757   3
   5   1  -5 5270.21 88.8711   4
   1  -5  -5 5923.41 118.668   9
  -5  -1   5 5615.21 74.4965  44
  -5   1   5 4705.91 70.5176  44
  -5  -5   1 6260.47 116.417   3
   1  -5  -5 7195.05 127.360   3
  -1  -5   5 4971.20 98.7504   4
  -1  -5  -5 7650.67 129.397   3
  -5   5  -1 5951.75 100.514   2
   1   5   5 4895.68 105.896   5
   5   5  -1 4779.74 112.036   2
   1  -5   5 7455.22 121.635   3
  -5  -1   5 4587.62 93.4457   7
   5   5  -1 6425.73 110.922   9
   5   5   1 5173.27 127.001  43
  -1  -5  -5 6571.15 107.523   4
  -1   5  -5 5665.77 109.439   2
  -5  -1  -5 7133.45 109.642  44
  -5  -1  -5 5104.45 101.894  10
   5  -5  -1 5801.45 117.603   9
  -5   5   1 5021.46 80.5438   2
   5  -5   1 5629.94 110.366   4
   1   5   5 5067.63 95.5941   8
   5  -5  -1 5626.01 113.180   4
   1   5  -5 5881.05 109.082   1
   1  -5   5 6345.96 114.903   8
  -5   1   5 4746.65 106.331   7
   5   1  -5 6051.61 117.283   9
   1  -5  -5 6903.06 122.595   4
   5  -1  -5 5823.39 100.435   4
  -5  -1  -5 6906.65 117.793   2
   5  -1  -5 6289.36 118.439   1
   5  -1   5 5890.40 103.077   8
   5   5   1 6299.34 101.688   9
   1   5   5 7261.05 143.399   6
   5   5  -1 5305.80 116.072   1
   5  -5  -1 7091.54 94.4564   3
   1   5  -5 4742.44 92.9073   9
   5   1   5 5929.42 129.099   6
  -5   5   3 25070.9 246.131   5
   5   5   3 17753.8 268.822  43
   5  -3   5 21667.1 244.003   4
  -3   5  -5 29534.7 278.076   1
  -3   5   5 24678.4 250.920   5
  -5   5   3 21524.2 229.050  44
  -5  -5   3 24201.0 225.332   7
  -5  -3  -5 18848.5 219.976  10
  -5  -5  -3 23943.6 238.874   7
   5  -5   3 21077.4 221.515   8
  -5  -5   3 22942.2 257.728   3
   5  -3   5 21392.1 232.508   8
   5   3  -5 25342.2 282.484   1
   3   5  -5 27807.9 269.085   9
   3  -5  -5 24151.5 276.966   9
   3   5  -5 23327.0 247.575   2
  -3   5   5 26239.6 217.504  44
  -5  -3   5 26122.4 295.999   3
   5  -5   3 22473.5 285.934   6
  -5   3   5 21861.9 198.963  44
  -5   5  -3 25201.1 267.483  44
   5  -5  -3 24364.5 260.754   4
   5  -3  -5 22271.9 240.669   4
   5   5  -3 22244.8 267.012   1
  -5   3   5 26262.5 220.136   5
  -3  -5  -5 25427.7 238.167   7
   5  -3   5 20921.4 278.760   6
  -5  -3   5 27106.6 237.739   7
   5  -5   3 23668.4 253.755   4
   3  -5   5 23590.3 307.469   6
   5   3   5 24858.8 287.020   6
  -5   5  -3 26062.6 255.471   2
  -5  -3  -5 21547.1 224.210   7
   5  -3  -5 26608.7 287.675   9
  -5  -3  -5 28499.6 247.771  44
   3  -5  -5 23963.7 263.288   4
  -5   5   3 21766.0 260.504   7
   3   5   5 24419.5 248.830   8
  -3   5  -5 25297.2 262.543   2
   5   5  -3 21418.0 254.335   2
   3   5  -5 25587.9 265.253   1
  -5  -3   5 29587.4 211.665   8
   5   3  -5 28381.0 277.985   9
  -3   5  -5 26433.3 255.270  44
  -5   3  -5 28007.9 261.297  44
  -5  -5  -3 23727.2 240.748   3
  -5   3  -5 26309.7 262.839   2
  -3  -5  -5 26151.6 252.329   3
   5   3   5 24109.2 248.830   8
   3  -5   5 22725.4 244.922   8
  -5  -3   5 22836.0 193.163  44
  -5   5   5 26585.3 260.458  28
  -5  -5   5 27984.7 315.494  11
  -5  -5  -5 24355.0 255.896   7
  -5   5   5 26906.7 261.285  39
   5  -5  -5 28979.4 316.454  14
  -5   5   5 25142.8 236.281  44
   5  -5   5 25382.4 285.946   4
  -5   5   5 26890.6 264.536  23
  -5   5   5 20312.3 277.226   7
  -5  -5   5 28156.6 246.796  20
   5   5   5 19790.9 323.751  12
  -5   5   5 27127.0 264.456   5
   5  -5   5 29042.9 312.345  15
   5   5  -5 29050.7 302.175  25
  -5  -5   5 28148.0 324.347   3
  -5   5   5 27560.7 255.708  26
   5  -5   5 27410.8 308.079  13
  -5   5   5 26816.6 271.533  32
   5  -5  -5 27892.0 273.416  34
   5  -5   5 24654.0 271.251  36
  -5   5  -5 29057.2 306.542  12
  -5  -5   5 28966.1 272.916  37
   5   5  -5 26916.4 279.985  40
   5   5  -5 26623.3 309.116   1
   5  -5   5 24053.0 267.421  22
   5   5  -5 26319.9 281.650  29
  -5   5   5 25174.3 261.264  35
   5   5   5 26202.7 283.258   8
   5  -5  -5 24165.7 281.233   4
   5   5   5 30053.7 347.015   6
   5  -5  -5 31580.8 285.157  33
   5  -5  -5 29127.6 317.536  16
   5  -5  -5 26192.1 308.422   9
  -5   5  -5 24656.1 267.365  39
   5   5   5 24063.1 281.320  25
   5  -5   5 22825.8 319.246   6
  -5  -5   5 26824.0 250.775  42
   5  -5   5 30081.2 326.626  14
   5  -5  -5 25652.8 286.006  41
   5   5   5 26902.9 257.690  22
   5   5   5 23655.6 247.255  23
   5   5  -5 30577.0 341.925  19
   5  -5   5 24528.1 265.012  27
   5  -5   5 30522.1 331.158  16
  -5   5   5 27817.7 257.905  21
  -5  -5   5 27767.0 314.403  18
   5  -5   5 26719.5 253.592  32
   5  -5   5 21112.5 249.258   8
  -5   5  -5 25191.8 280.850   2
   5   5  -5 30656.9 309.700   9
  -5   5  -5 26928.1 284.222  44
  -5   5   5 29851.3 330.959  13
   5   5   5 20584.5 257.394  34
   0   0  -6 2.44196 7.95523   9
   0   6   0 8.93998 13.8006   2
   0   0   6-5.87553 14.6040   6
   6   0   0 9.87736 7.64907   4
   0   0  -6 7.56675 9.73900  10
   6   0   0 12.1150 9.58934   9
  -6   0   0-0.88713 12.6441   7
   0   6   0 27.2929 7.09610   1
   6   0   0 13.5455 6.84836   6
   0   6   0 13.7635 9.90904  44
   0  -6   0 128.819 20.3306   3
   0   0  -6 124.095 14.9328   1
   0  -6   0 8.30903 16.4218   4
   6   0   0 31.9021 20.1786   1
   0   6   0 83.9585 17.2517   5
   2   6   0 5556.13 126.083  43
   6   0   2 5656.57 95.1568   6
   2  -6   0 5254.47 102.698   4
   6   0   2 5075.68 61.3965   9
  -6  -2   0 5725.51 91.9303   3
  -6   0  -2 6078.78 104.531   7
  -2   0   6 6225.48 83.2117   8
  -6   2   0 5784.59 86.7741   2
  -2   6   0 5973.27 100.155   2
  -6   2   0 6435.77 114.056   7
   0  -2   6 5826.84 97.3703   8
   0  -2  -6 6087.92 93.7231   9
   2   0  -6 5581.68 84.4090  10
   6  -2   0 5492.28 89.1281   9
   6   0  -2 5250.39 95.6793   9
   6  -2   0 6949.97 90.7598   6
   0   2   6 5863.35 91.7798   8
   6   0  -2 5455.87 121.515   1
   2   6   0 5729.74 81.1071   1
   0   2  -6 5882.43 102.400   1
   0  -6  -2 5560.21 102.383   4
  -2   0  -6 6821.90 105.612   2
   6   2   0 5853.81 92.6917   9
   0  -6   2 5162.50 96.8437   4
  -6  -2   0 5823.02 104.859   7
   6  -2   0 5057.45 81.5330   4
  -2  -6   0 5365.73 87.8092   4
   0   6  -2 5352.94 94.7887  44
  -2   0   6 5850.33 86.5052   7
   0   2  -6 6039.92 95.4684   2
   0   6   2 4719.29 88.3776  44
   0   6  -2 5639.15 97.4384   9
   0   6   2 6247.67 131.813  43
   2  -6   0 6072.27 94.7638   3
   0   6   2 5823.78 104.177   2
   0   6   2 5721.32 107.167   5
  -2  -6   0 6369.53 93.2008   7
   2   0  -6 6189.82 100.141   1
  -6   0  -2 6048.09 102.657  44
   0  -2  -6 5814.44 86.0049   1
  -6   0   2 6167.14 113.317   7
   2   0  -6 5709.47 98.2178   9
   0   6  -2 5278.66 103.208   2
   6   0  -2 5978.88 78.5390   4
  -2  -6   0 5965.86 104.369   3
   0  -6   2 5258.65 92.8486   3
   6  -2   0 5434.78 120.278   1
   0  -2   6 4685.93 109.836   6
   0   2  -6 6195.29 100.599  10
   0  -2   6 4282.99 96.3628   3
   2   6   0 5170.95 92.5284   5
  -2   6   0 5575.63 100.014  44
  -2   0   6 4507.23 92.7746   6
   2   0   6 5662.41 95.9679   8
   0   2  -6 5217.63 83.0924   9
  -2   6   0 5604.71 58.9176   1
  -6   0   2 5544.44 92.4842  44
   2   0   6 4707.72 112.720   6
   0   6  -2 4963.42 75.7342   1
   0   2   6 4546.49 101.781   6
  -2   0  -6 6360.70 104.207   1
   0  -2  -6 5730.85 97.5258   4
  -6   0   2 5278.88 96.0689   3
  -2  -6   2 12172.4 144.355   4
   6   2   2 16939.9 179.354   6
   2  -6  -2 13356.1 173.861   4
   6   2   2 12189.5 196.857   1
  -2  -2   6 10623.6 157.351   6
  -6  -2   2 13167.9 147.942  44
  -2   6  -2 14126.3 137.440   1
  -6  -2   2 13407.8 165.250   3
  -2  -2  -6 15523.5 158.347   4
  -6  -2   2 14740.8 174.531   7
  -6   2  -2 14062.4 159.302   2
  -2   2  -6 15221.8 177.680  10
   2   6  -2 14437.8 158.490   1
  -2   2  -6 16542.6 181.177   2
  -6   2  -2 16561.0 182.368   7
   2   2  -6 13971.6 170.727   1
   2  -2  -6 13670.7 148.532   1
  -2   2   6 10940.5 153.003   6
   6  -2  -2 13893.8 169.681   9
  -2  -2   6 14797.3 124.587   7
   6  -2  -2 13960.2 153.353   4
  -6   2   2 12096.4 170.435   7
  -2   6  -2 12812.4 168.865   2
   6  -2   2 14138.4 149.135   4
   2  -6   2 11442.2 134.849   3
  -6  -2  -2 12871.8 162.535   7
   6   2  -2 11386.0 181.060   1
   2   6  -2 13726.8 167.230   9
  -2   6   2 12883.3 157.165  44
  -6   2  -2 14439.2 173.392  44
   2  -2  -6 14301.2 173.646   9
   2  -6   2 12724.5 168.662   4
  -2  -2   6 14555.8 152.918   8
  -2  -6  -2 14792.8 179.258   3
  -2  -2  -6 16419.4 168.750   2
   2   2  -6 13156.1 160.297   9
  -2   2  -6 15379.5 181.504   1
   2   6   2 11539.0 156.861   5
   2   6  -2 12298.1 169.401   2
  -6   2   2 13268.4 160.717  44
   2  -2  -6 11552.3 153.549   4
   2   2   6 11845.7 181.249   6
  -2   6   2 14394.2 151.963   2
  -2  -6   2 13515.6 132.437   7
   2  -6  -2 14418.2 165.749   3
   6  -2   2 11890.6 116.585   9
  -6   2   2 14146.3 124.221   2
   2  -2   6 10875.9 185.307   6
   2  -2   6 12747.5 162.338   8
  -2   2   6 13433.5 129.712   8
   2   2  -6 14958.9 144.465  10
   2   6   2 11408.2 197.826  43
  -2   6  -2 12618.4 162.147  44
   6   2   2 16256.3 164.440   8
   2   2   6 13654.6 161.759   8
  -2   6   2 13083.5 181.247  43
   2   6   2 11718.1 172.403   2
   6   2  -2 14286.9 170.026   9
  -2  -2  -6 13950.8 151.883   1
   6   2   2 11435.6 111.711   9
   6  -2  -2 12701.6 186.489   1
  -2   6   2 12749.6 172.574   5
   6  -2   2 13825.9 170.022   6
  -6  -2  -2 13116.8 158.177  44
   0  -4   6 30.0807 19.1423   3
   6  -4   0 12.7468 16.1616   9
   6   0  -4 48.1668 23.3535   1
  -6   0  -4-3.22972 15.6109  10
   0  -6  -4 27.8891 22.0578   4
   4  -6   0 5.12501 15.8144   3
   0  -6   4 2.43951 15.0649   4
  -4   0  -6 10.9508 12.9354   2
   6   4   0 28.6056 29.7427   1
  -6   0   4 31.4836 12.0721  44
  -4  -6   0 18.7460 13.6642   7
   0   6   4 19.5635 23.8407  43
   0   4  -6 20.5733 14.4930   1
   6  -4   0 33.5553 24.0504   4
   0  -6  -4 4.80047 18.4409   3
  -6  -4   0 18.4738 20.7452   3
   0  -4   6 34.0654 22.0782   6
  -4   6   0 40.2928 15.0397   2
   0   4  -6 37.0024 14.6553   2
   0   4   6 38.5758 20.1879   6
   0   6  -4 120.935 18.5038   1
  -6   0   4 179.445 24.3115   7
   4   6   0 8.27918 17.8060   9
  -6   0  -4 4.84909 11.3985   2
  -6   0  -4 2.30231 12.8604  44
   4   0  -6 3.53009 15.6006   1
   0   6  -4 12.4216 11.9432  44
   4   0  -6 183.424 24.7890   9
  -4   6   0 133.388 20.8017   7
  -4   0   6 62.6317 9.16760   8
  -4   6   0 18.5667 14.2028  44
   0  -4   6 67.4407 16.8395   8
  -6   4   0 5.18771 9.85876   2
  -4   0   6 10.6687 13.9576   7
   4   6   0 4.88761 24.1486   1
   4   0   6-1.85163 9.43394   8
  -6   4   0 13.4005 14.4892   7
   0   6   4 24.5743 15.6347   5
   4   6   0 12.0741 20.7897   2
   6   0   4 5.91409 17.8054   6
   0   4   6 7.95848 9.36276   8
   0  -4  -6 4.56736 14.7041   4
  -4  -6   0-2.46688 20.1523   3
   0  -4  -6 21.5412 15.7739   9
   0   4  -6 12.5483 14.3076   9
  -6   0  -4 0.84928 16.0379   7
   4   0  -6 5.41187 12.8053   4
   0   6  -4 156.021 23.9667   2
   6   0  -4 23.9163 12.7442   4
   4   6   0-0.80172 25.0337  43
   6   0   4 5.80731 10.5172   8
   0   6  -4 6.20363 15.1992   9
  -4   0  -6-0.50223 13.8309  10
  -6   0   4 2.31105 18.6971   3
   6   4   0 2.77246 15.1843   9
  -2  -4   6 6367.91 106.251   8
  -2   4  -6 6195.44 117.401   2
   2  -4   6 5328.44 95.6094   3
  -6  -2  -4 5979.93 106.313  44
   6  -2  -4 5673.86 104.988   4
   6  -4  -2 5464.22 106.656   4
   6  -4   2 5188.65 88.3416   9
  -4  -2   6 3952.01 109.848   3
  -4  -6  -2 5187.47 108.471   3
   6  -2   4 4944.08 94.5066   4
   6  -2   4 5002.71 92.3652   8
  -6   4  -2 6090.21 106.533   2
  -4   6   2 6108.17 89.2920   2
   6  -2  -4 5036.78 113.165   1
   4  -6  -2 6404.53 103.775   3
   4   6  -2 5008.90 116.911   2
   4   2  -6 5456.40 110.950   9
  -4  -6   2 5292.75 91.2124   7
  -2  -4   6 6001.48 129.132   3
  -4  -6   2 5722.71 117.102   3
   2   6  -4 5084.51 110.864   2
  -6  -4   2 5716.46 105.119   7
   2   4   6 5758.18 130.505   6
   6   4   2 5496.67 127.031   1
   6   4   2 5808.54 85.8549   9
  -6   4   2 4977.22 116.022   7
   6  -4  -2 5659.09 116.554   9
   6   4  -2 4158.52 102.023   2
   4  -2  -6 5071.25 101.520   4
  -4   6  -2 5034.91 100.730   2
  -4   6   2 5286.83 113.573   7
   2   6   4 4412.54 128.879  43
   6  -2   4 5270.38 121.018   6
   6   4  -2 6647.88 120.086   9
   2  -4   6 4830.63 127.885   6
  -6  -2   4 5392.45 85.1015  44
  -2   4  -6 6261.27 118.970   1
   2  -4   6 5390.24 107.265   8
  -2   4   6 5308.11 103.624   5
  -2   6   4 5865.09 116.976   5
   2  -6   4 5974.68 96.7108   3
   2  -6  -4 5925.68 119.040   4
   4  -2   6 4909.99 99.5977   8
  -4   6   2 5326.70 111.618   5
  -6  -2  -4 4167.98 89.3201  10
  -2  -4  -6 6698.38 119.611   3
   4   2   6 5297.79 102.728   8
   6   4  -2 4608.15 118.726   1
   6   4   2 3970.40 110.570  43
   4   6  -2 5149.48 124.906  43
  -2   6   4 5276.26 94.5390  44
   6  -4   2 5312.76 118.180   6
  -2   4   6 5728.71 86.3413   8
  -2   6  -4 5754.50 101.758   1
  -4   2  -6 7030.43 124.326   2
   4  -2  -6 6096.11 120.624   9
  -2   4   6 5292.78 112.797   6
   6   2  -4 5161.42 121.858   1
  -2  -6   4 4827.66 94.4506   4
   2  -6  -4 6471.21 120.107   3
   6   2  -4 4958.34 76.2644   4
  -6   2  -4 5384.94 105.921   2
   6  -4   2 5335.16 105.268   4
  -4  -2  -6 4786.48 98.4854  10
   6   2   4 6372.25 109.699   8
  -4  -2  -6 5052.82 89.7713   7
  -4   2   6 5353.95 110.209   7
   4   6  -2 5080.88 109.005   1
  -6  -2  -4 5108.14 99.2565   7
  -6   4   2 5170.28 103.208  44
   2   6  -4 5347.24 104.368   1
  -4   6   2 5316.18 104.265  44
  -6   2  -4 6358.39 114.543  44
  -2  -6   4 5727.39 115.004   3
  -4   6   2 5638.16 104.009  43
  -6   2   4 4808.10 86.2133  44
  -2  -6  -4 6286.73 117.333   3
  -4   6  -2 6306.67 119.579  44
  -6  -2   4 5810.61 109.738   7
  -6  -4  -2 5356.18 104.169   7
  -2   6  -4 5684.70 106.599  44
  -6  -4  -2 5052.77 94.4977   3
   2   6   4 4300.67 101.247   5
   4   6   2 4240.84 130.839  43
   2   6  -4 5603.47 107.223   9
  -2  -4  -6 6289.09 103.054   4
   2   4  -6 5641.62 104.858   2
  -4  -2   6 4914.28 85.6375   7
   2   4  -6 6192.90 110.855   9
   2  -4  -6 6358.56 123.426   9
  -2   6   4 5287.62 116.876  43
  -2   6  -4 4886.51 105.900   2
  -6   4  -2 6380.72 119.605  44
   2  -4  -6 5480.95 108.591   4
  -6  -2   4 5942.38 127.462   3
  -4  -2   6 6379.00 86.3678   8
   6   2   4 6323.74 124.556   6
  -4  -2  -6 6424.18 114.268   2
   4   2  -6 5948.86 118.397   1
  -6  -4   2 5409.81 110.438   3
   4   6   2 3958.57 88.4355   5
   2  -6   4 5474.84 113.301   4
   4  -6   4 52.0691 33.5280   6
  -6  -4   4 56.9460 19.0681  42
  -4  -6   4 409.115 31.0454  36
  -4  -4   6 43.1341 26.4533   3
   6  -4  -4 65.3119 23.7607  33
   4   6  -4 69.9696 32.6842  29
   4   4   6 68.4663 19.4871  30
   4  -6   4 53.1648 19.2205  36
   4  -4   6 46.8466 25.6988  13
   4  -6   4 52.7590 24.1114   4
  -4   6   4 135.891 23.2458  23
  -6   4  -4 81.9920 31.3383  21
   4   4  -6 73.8170 29.3389  29
   4   6  -4 72.1560 27.9622   1
  -4   6   4 69.4061 17.2451  44
  -6   4   4 129.737 23.4034  32
  -4   6   4 58.8662 21.0589  32
  -4   4   6 322.257 28.8987  28
  -6   4  -4 52.7577 18.4566   2
  -6  -4   4 73.4843 33.4280  18
  -6  -4   4 74.9952 24.4291   3
  -4  -4   6 106.584 41.9756  18
  -4   4   6 60.4651 17.6298   5
   4  -6  -4 63.2380 25.0950  41
   6   4   4 90.8495 27.9925   6
   4  -4   6 86.8005 22.2027  36
   4  -6   4 70.0232 34.7062  14
   4   6   4 58.3056 29.0344  34
  -4  -6   4 80.7517 34.1524  18
   4   6  -4 63.0420 31.8282  25
  -6   4   4 54.5720 21.7820  26
   6  -4   4 27.7562 25.3545   6
  -4  -6   4 51.4561 23.8609   3
   4   4  -6 93.1356 23.7906   9
   6  -4   4 49.8546 19.7532  22
   6   4   4 58.4983 16.9127   8
  -4  -4  -6 60.4572 22.8864   3
  -4  -4   6 303.664 24.3179   8
  -4  -4  -6 68.6641 18.0060   7
   6  -4   4 64.1380 21.6588  36
  -6  -4   4 87.4216 33.7598  11
  -6   4   4 89.9627 17.8511  44
   4   6   4 34.0829 29.7583  43
  -6   4  -4 74.6044 31.2966  26
  -6   4  -4 71.0883 20.1415  44
  -4   6   4 80.6144 21.9070   5
   4  -4   6 42.5632 16.7454   8
   4  -4  -6 59.5331 22.8155  34
  -4   6  -4 135.059 22.9349  44
   6   4  -4 82.0843 32.2758   1
  -4   4   6 62.3533 20.8050  23
  -4  -6   4 248.070 22.8364  42
  -6   4   4 243.749 28.5579  35
  -4   6   4 395.929 37.7704  40
   6  -4   4 49.4636 26.0059  24
  -6   4   4 63.1988 19.2286  39
  -4  -6  -4 71.2904 26.1403   3
   4  -4   6 85.6960 24.0215  24
  -6  -4  -4 89.0281 19.3628   7
   6  -4   4 97.6325 38.2974  15
   4  -6  -4 39.0124 23.7411   9
   4   6   4 71.3391 29.7998  25
  -6   4   4 73.0312 22.7736  21
  -4   4   6 123.697 30.7841  13
  -4  -4   6 64.8877 16.9174  42
  -4   6  -4 76.0015 17.5478   1
   4  -6  -4 50.4983 22.0375   3
   4  -6   4 47.8391 18.6654  38
  -6   4   4 30.0259 17.2284   5
   4   6  -4 63.5889 23.5596   9
  -4   6  -4 82.0501 32.9713  39
   6  -4  -4 73.4291 27.3543  41
   6  -4   4 37.8377 21.9969   4
   4  -4  -6 49.7714 21.9153   9
  -4   6   4 70.8004 22.2565  28
  -4   4   6 48.0686 17.7690  39
  -4  -6  -4 53.4077 18.1501   7
  -4   4   6 202.266 27.5550   7
  -4   4  -6 83.0211 20.5581   1
   6  -4   4 59.3247 18.3620  38
   4   4  -6 66.6516 33.0732  25
   4   6  -4 62.7211 25.4741   2
   4  -6  -4 84.8875 21.1457  33
   6   4   4 53.7760 16.7027  22
  -6   4  -4 50.1824 28.5838  39
   4  -6   4 74.1936 18.6839   8
   4   4  -6 64.4129 23.8434  40
  -4  -4   6 73.3888 39.6008  11
   6  -4  -4 67.1983 26.9000   4
   4  -4   6 41.2835 19.9291   4
  -4   4  -6 93.5858 20.4703   2
  -4   4  -6 98.9311 25.2168  12
   4  -6   4 115.821 32.5176  13
   6   4  -4 107.057 41.7738  19
  -4  -4   6 55.3624 16.4690  20
  -6  -4   4 61.4783 21.7821  37
   4  -4  -6 51.1984 27.3059  41
  -4  -6   4 43.9623 19.0685  37
  -6  -4   4 100.875 21.8448   7
   4   6   4 46.4557 22.9767  17
  -6   4   4 179.344 27.9522   7
  -4   4  -6 88.4925 27.2695  39
   6  -4  -4 80.4532 25.3650  34
   4   4   6 50.9305 27.5292   6
   4  -4   6 39.7835 20.8401  37
  -4   4   6 106.236 20.7464  32
   4  -6   4 60.9129 34.3898  16
   4   4   6 54.6295 15.5508   8
  -4  -6   4 62.6475 34.0261  11
  -6   4   4 58.2950 28.4146  13
  -6  -6   0 5588.14 120.911  11
   0   6   6 4909.27 115.196  17
  -6   0   6 5784.51 106.488  20
   6  -6   0 4622.44 108.680   9
   6   6   0 5469.94 121.081  25
   0   6  -6 5643.36 131.478  12
   0  -6   6 4087.74 105.682   4
   6   0  -6 5504.90 124.433  34
  -6   0   6 5801.18 98.3069  35
   6   6   0 5910.15 115.676   9
   0  -6   6 4855.45 97.0621  35
   6   0  -6 4899.20 97.1577   4
  -6   6   0 5340.06 108.751  26
   0   6  -6 5630.40 114.364  40
   0   6  -6 4959.82 111.918   1
   6   0   6 4870.29 130.888   6
   0   6   6 4903.23 102.773  28
   0   6  -6 4658.82 115.626   2
   0  -6   6 5242.59 100.948  42
  -6   6   0 4224.57 87.6727   2
   6   6   0 6458.73 109.218  22
   6   6   0 5242.95 107.013  41
   0   6   6 5079.79 102.908  24
  -6  -6   0 6263.26 121.303  37
  -6  -6   0 5537.82 120.802  18
  -6   0   6 4129.18 128.322  18
  -6   6   0 5633.95 113.170  39
  -6   0   6 5515.83 99.3366  26
   6   0  -6 5345.75 112.746  41
   6   6   0 4543.17 133.293  12
  -6  -6   0 5601.42 109.723  36
  -6   0  -6 4957.03 111.047  10
   6   0   6 5361.42 111.262   8
  -6   0  -6 5812.61 119.879   2
   6   0  -6 6302.97 142.656  19
   6  -6   0 4491.47 110.994   4
  -6   0   6 5483.88 99.8700  21
   0   6  -6 4923.37 98.6160   9
   0  -6  -6 6140.47 128.516   3
   0   6   6 4960.46 103.276  23
   6   0  -6 5281.67 120.342  25
   6   0  -6 5677.09 128.014   9
   6   0  -6 5194.49 124.753   1
   6  -6   0 5613.14 112.168  27
   0   6  -6 5711.88 119.162  29
   0  -6   6 5242.28 101.742  37
   0  -6   6 5485.16 128.551  16
   6  -6   0 5851.26 107.482  31
   0  -6   6 5701.31 123.270  13
   6   0   6 5177.77 107.409  22
  -6   6   0 5245.25 108.517  21
  -6   0   6 4099.23 128.846  11
   0   6   6 5050.82 118.874  29
   6   0   6 5120.54 108.633  38
   0  -6   6 5442.43 126.907  14
  -6  -6   0 5399.38 108.635   7
  -6  -6   0 5036.85 114.098   3
   6   6   0 5274.27 130.283   1
   0  -6   6 7050.19 136.578   3
   0  -6  -6 5713.20 119.781   4
   6   6   0 5678.44 113.146  23
  -6   0   6 4015.02 102.307   7
   0  -6   6 5959.90 147.430   6
   6   0   6 4071.91 90.7556  31
   0  -6  -6 4981.02 112.217   9
   6   6   0 5432.10 119.644  34
   6   0   6 5627.91 122.299  24
  -6   6   0 5581.61 130.466  17
   0   6   6 5368.22 104.020  30
  -6  -6   2 11718.6 145.873  42
  -6  -2   6 10200.2 206.794  11
  -6  -2  -6 12415.7 180.509   2
   2   6  -6 12782.9 181.285  28
   6   2   6 11839.8 166.622  22
  -6   2   6 12405.8 155.215  20
   2  -6   6 11769.9 220.509   6
   6  -6   2 11026.3 189.173  16
   6   6   2 11537.4 169.501  23
   2   6   6 10623.2 151.932  24
  -2  -6   6 11976.9 160.421  37
  -6   2   6 11235.9 154.290  26
   2  -6   6 10235.8 156.015  42
   6  -2   6 9553.50 192.317   6
   2  -6   6 11400.4 157.012  27
  -6   6  -2 11758.8 182.192  44
   2  -6   6 9450.33 142.852  35
  -2  -6   6 10257.9 140.866  35
  -6   6   2 12706.1 170.574  26
   6   2   6 12772.4 182.193  24
   2  -6   6 10125.8 166.047   8
   6  -2   6 11089.2 235.143  19
  -6  -6  -2 11020.6 161.405  36
  -6   6  -2 10947.6 159.654   2
   6  -6   2 11009.5 165.145  22
   6   6   2 11598.6 185.885  34
  -2   6   6 11036.7 163.553  28
  -2   6  -6 12243.8 193.731  12
   6   2  -6 10951.7 192.309   1
  -6   6  -2 11800.3 177.362  26
   6  -6  -2 11940.6 195.264  16
   2  -6   6 10804.0 159.678  37
   2   6   6 11255.1 179.019  29
  -6  -6   2 10852.5 176.234   3
  -6  -2   6 11676.4 143.973  26
   2  -6  -6 13501.7 206.183  16
  -6  -2   6 11783.2 145.858  21
  -6  -6   2 12887.0 199.746  18
  -6  -2   6 8136.56 173.235   3
   6  -6   2 11114.3 169.262  27
   6  -6   2 12167.7 214.168  15
  -6   2   6 10742.0 180.783  13
  -6  -6  -2 12288.7 180.167  11
  -6  -2   6 11537.3 159.697  20
  -2  -6   6 13953.3 214.412   3
   6  -6   2 9524.43 166.112   4
  -2   6   6 9924.85 145.151  39
  -6   6   2 10046.7 162.414  44
  -2   6   6 10645.8 149.124  35
   2   6   6 10110.5 152.113  23
   6  -2  -6 11061.3 187.596   9
  -6  -6  -2 12638.1 182.261  18
   2  -6   6 9571.07 167.259   4
  -6  -2   6 12133.0 143.710  35
   6   2   6 10625.1 212.594  19
  -6  -2   6 10224.3 205.501  18
  -6  -2  -6 8582.29 148.268  10
  -6  -2   6 9135.23 144.767   7
  -6   2   6 11261.0 155.788  35
   6  -2   6 13927.6 217.855  15
  -6  -6   2 11446.1 157.812   7
  -6   2  -6 9835.30 144.325  39
   6  -2   6 11398.6 180.463  36
  -6   2   6 9217.82 212.682  11
   6   2  -6 10511.1 140.651   4
   6  -2   6 8854.10 151.012  22
   2  -6  -6 10504.9 178.979   9
   6  -6   2 10863.7 186.993  14
   6  -2  -6 11765.9 177.026  41
   2   6  -6 12442.4 180.374  40
   6   2   6 12725.6 206.100  15
  -2  -6   6 12756.2 165.545  36
   6   2  -6 13592.5 220.897  19
   6  -2   6 9936.05 156.137  27
   6  -6  -2 10586.0 180.801   9
   6   6  -2 12993.9 168.377  23
   2   6  -6 12013.2 193.195  12
   2  -6   6 12087.1 201.610  16
   6   6  -2 10798.3 178.491  25
   6   6  -2 12402.6 167.967  41
   6   6  -2 12834.5 184.402   9
  -6   2   6 9176.96 211.618  18
  -2   6   6 10461.5 172.202   5
  -2  -6   6 13339.0 202.814  18
  -6  -6   2 11883.7 153.278  27
  -2   6  -6 11813.2 173.504  39
  -6   6   2 12773.2 171.332  21
   6  -2  -6 11035.9 173.895  25
   6   6   2 11060.1 178.231  25
  -2   6   6 11053.2 190.573  13
   6  -2   6 11110.7 155.080  32
   6   6   2 9967.51 223.831  12
   6   6  -2 9125.85 175.317   2
  -6   6   2 13047.1 180.930  39
  -2   6   6 11467.1 175.845  17
   2  -6   6 11795.7 197.623  14
  -6  -6   2 12843.6 199.587  11
   2  -6   6 11447.3 165.184  36
   2   6  -6 12370.4 183.838  29
   6  -2   6 7492.51 131.298  31
   6   6   2 11951.9 189.311   1
   2   6  -6 11479.0 167.396   9
  -2  -6   6 10159.4 170.575  16
  -6  -2   6 11510.5 151.307  42
  -6   6  -2 10406.2 159.224  39
   6   2   6 11454.9 155.804  32
  -2  -6  -6 11996.5 179.547   3
   2   6   6 11455.7 164.222  30
   6   6   2 10727.7 155.883  33
   6  -2   6 10550.6 157.222  30
   6  -6  -2 13307.7 172.346  33
   6   6   2 8171.09 187.780  43
   2   6  -6 10126.6 170.288   2
   6  -2   6 9235.61 155.624  38
   6   2   6 10305.7 162.484   8
   6  -6   2 11092.1 157.513  38
  -2   6  -6 11680.3 175.677   1
  -6   2   6 11553.0 157.210  21
   6  -2  -6 9711.92 154.665   4
   2  -6  -6 10293.6 149.401  33
   2   6  -6 11129.8 177.828   1
  -2   6   6 10791.9 156.313  23
   2  -6  -6 11301.7 180.002   4
   6  -6  -2 12344.5 159.858  31
   6   2  -6 11244.9 182.036   9
  -6   2   6 11054.5 148.187  39
   2  -6  -6 13539.9 206.519  14
   6  -6   2 11614.9 159.570  31
  -6  -2   6 12692.0 160.806  37
   6   2   6 9365.10 134.945  33
  -6   2   6 11091.2 154.468  32
   6   6  -2 10974.2 173.625  34
  -6   2  -6 12012.7 181.245   2
   6  -2  -6 11974.8 182.293  34
  -2   6   6 11776.8 174.281  40
   6   6  -2 10907.9 200.210  12
  -6   6  -2 11494.9 173.485  21
  -2  -6   6 13497.1 204.341  11
  -2  -6   6 9967.58 167.905  14
   6  -6  -2 10570.4 175.430   4
  -2   6  -6 10510.7 156.462  40
  -6  -6   2 12263.9 166.355  37
  -2  -6   6 11028.9 148.797  42
   2  -6   6 12476.6 192.326  13
   6  -6   2 11488.3 179.000  24
   2   6   6 12731.2 220.117   6
  -6   6  -2 13001.0 199.722  17
  -6   6   2 12246.3 179.978  40
  -6  -6   2 12150.4 165.764  36
  -2   6   6 6561.07 124.360  32
  -6   6   2 10486.6 178.097   7
   6  -6  -2 11974.6 194.849  14
   2   6   6 9710.79 171.605  17
   2   6  -6 12291.2 186.562  19
  -6  -6  -2 11129.1 166.173   3
   6   6   2 10557.7 157.330  41
  -2   6  -6 11309.9 171.627  28
   2   6   6 9421.67 130.239  22
  -2   6  -6 10049.6 170.080   2
   6  -6  -2 12042.2 174.136  41
   2   6   6 11777.6 169.376   8
   2  -6   6 11152.1 152.584  38
   6  -2   6 9899.42 154.238   8
  -6   2   6 8533.68 162.281   7
   6   2   6 10193.6 188.437   6
   6   2  -6 11537.8 178.921  34
   6   6   2 12540.6 166.849  22
   6   6  -2 8654.00 173.387   1
   6  -2   6 12752.1 192.388  24
   4  -6   6 1558.07 60.8441  35
  -6  -6  -4 1818.09 67.3537   7
  -4   6  -6 2230.93 87.2842  12
   6  -4   6 2072.35 69.3366  32
  -4  -6   6 2140.37 60.7276  27
  -6   6  -4 1931.62 75.4553  44
   4   6   6 2060.15 66.1981  22
   6  -6   4 2019.92 90.3246  15
   6  -6  -4 2162.57 93.5756  16
   6  -6   4 2223.67 94.1983  16
   4  -6  -6 2159.63 93.0253  16
   6   6  -4 1644.30 89.8815  19
   6  -6   4 1866.27 66.7820  31
   4  -6   6 1807.24 76.0942   4
   4  -6  -6 1754.32 76.6203   4
   6  -4   6 1672.03 63.1228   8
  -6  -6   4 1841.48 77.1361   3
  -6   6   4 2154.37 71.5539  39
  -6   4   6 2270.76 70.4262  26
  -6   6   4 1943.23 67.9249  28
   6  -6   4 1863.86 68.8450  38
  -6   6  -4 1895.55 79.4922  26
   4  -6   6 2524.24 79.3927  24
  -4   6  -6 1854.24 72.2252  28
   6   6   4 2221.67 71.9344  22
   4  -6   6 1924.62 69.7864  27
  -4  -6   6 2146.51 71.1388  37
  -4   6  -6 2319.67 81.8185   1
   4   6   6 2488.33 105.802   6
  -6   4   6 1918.92 68.9220  35
  -4  -6   6 2237.36 68.6154  36
   4  -6  -6 1725.54 74.2398  41
  -6  -6   4 2141.82 90.3532  18
  -6  -6   4 2226.69 74.3790  37
   6  -4   6 2308.34 94.6118  15
   4  -6  -6 1958.80 83.7564   9
   6   4   6 2005.53 89.6665   6
   6   6  -4 2138.77 70.8020  41
   6   4   6 1774.53 90.3303  19
   6   6   4 1937.32 70.7995  23
  -6   6   4 1665.41 77.1798   7
   4  -6  -6 2214.53 72.8193  33
  -6   6   4 2100.84 79.7527  40
   6  -4  -6 2207.03 87.1350  41
   6  -6   4 2218.96 93.2944  14
   4  -6   6 1867.13 67.8518  38
   4   6   6 2180.31 78.8450   8
   4  -6   6 2244.58 93.3612  14
   4   6   6 2183.78 113.788  12
  -4   6   6 2177.85 92.7567  13
   6   4  -6 2212.93 78.2810  40
   6  -4  -6 1801.43 75.5656   4
  -6   6   4 1954.10 68.2790  23
  -6   4   6 1992.55 68.3705  39
  -6  -4   6 2030.75 66.2491  42
  -6   6  -4 1946.48 79.0137  21
  -4   6   6 1786.40 69.9933   5
  -6   6  -4 2205.76 81.9146  12
   4   6  -6 2084.48 86.6068  19
   4   6  -6 1796.89 70.6801  28
  -6  -4   6 2244.96 105.709  18
  -4   6  -6 2063.16 77.8695  39
   6  -4  -6 2119.32 90.3929  16
   6  -6   4 1589.65 86.4505   6
   4   6   6 2067.33 78.6543  29
  -4   6   6 2040.66 71.2808  35
   6  -6   4 1903.53 72.3159  22
  -6   4   6 2032.38 87.2745  13
  -4   6  -6 1944.76 76.8215   2
   4   6  -6 2213.98 81.6601   9
  -6   4   6 2203.28 76.4523  17
  -6  -4   6 1951.77 88.8804   3
   6  -4   6 3351.22 101.303  24
   6   6  -4 2065.76 84.1924  25
   6  -6  -4 2146.27 71.6207  34
   6   6  -4 1529.82 79.1537   1
   6  -4   6 2091.42 86.5703  14
  -6  -4  -6 1538.21 60.3456   7
   6  -4   6 2057.64 79.5509  36
  -6   6  -4 2027.66 79.8625  39
   6   4   6 1900.82 76.7125  25
   6  -4  -6 2164.13 90.4253  14
   6   6   4 1941.90 66.9852  30
  -6   6   4 1576.98 61.0288  44
   6   4  -6 2189.54 85.7884  25
   6  -4  -6 2781.73 84.1908  33
   6  -6   4 2159.91 89.6178  13
  -6   6   4 1883.96 70.4721  35
   6   6   4 1831.28 80.1293  25
   6   4   6 2085.24 65.1190  32
   6  -6  -4 2156.14 65.9822  31
   4   6  -6 2156.17 83.2915  25
  -6  -4   6 2139.46 68.3308  20
   4   6   6 1981.57 59.5879  32
   6   4   6 1963.62 73.8202   8
   6   4  -6 1856.57 78.3433  29
  -4  -6  -6 2289.19 76.6537   3
  -6  -6   4 2051.83 63.5533   7
   6   6  -4 2202.24 77.6261  40
  -4   6   6 2052.31 62.3233  21
   4  -6  -6 2227.20 94.4703  14
  -6   6  -4 1903.32 71.8350   2
  -6  -6   4 2092.95 63.9124  27
   4  -6   6 2121.09 87.9543  13
   6   6   4 1479.16 102.589  12
  -6   4   6 1410.21 71.2482   7
   6  -6   4 1781.36 74.8133   4
  -6  -4   6 2134.31 72.0353  37
   6  -6  -4 1848.66 77.4425   4
   6  -6  -4 1880.09 68.3453   3
   6  -6  -4 2133.55 93.3769  14
  -6  -4  -6 1405.86 58.5768  10
   4   6   6 2277.80 76.7337  30
   6  -6   4 2033.86 73.4028  36
  -6   4   6 2041.21 71.5682  32
   4  -6   6 1787.64 68.8352  22
   6  -4   6 2135.26 88.1721  16
  -4   6   6 2308.17 83.3121  17
   4   6  -6 1894.91 81.3357  29
   6   4   6 1924.51 81.9478  15
   6  -4   6 1869.74 73.0920  22
  -4   6   6 1990.07 69.7109  32
  -6   4  -6 2073.11 77.5027   2
  -6   4  -6 1751.40 68.9501  39
   4  -6   6 1770.11 69.7027   8
   4  -6   6 2297.89 95.2862  16
   4  -6   6 1857.87 71.4853  36
   6  -6  -4 2386.49 78.8373  33
  -4  -6  -6 2012.36 70.2633   7
   6  -4  -6 2092.99 88.7315   9
  -6  -4   6 2399.18 109.660  11
   6  -4   6 1722.59 69.6922  27
   6  -4   6 1723.89 69.3127  38
   4   6  -6 2013.90 80.0560  40
  -4  -6   6 2070.01 64.9493  42
   6   4   6 1647.47 71.6030  34
   6  -4   6 2200.95 86.2867  13
  -6  -6   4 1947.63 62.7183  42
   6   4  -6 2220.73 84.3169   9
   4  -6   6 2007.96 74.3881  37
  -6   6   4 2122.52 69.0451  21
   6   6  -4 1868.61 77.4545  29
   4   6   6 2306.79 90.5947  25
  -6   6   4 1760.79 79.2885  17
   6   4   6 2030.10 68.7843  22
  -4  -6   6 1807.54 57.7108  35
   6  -6   4 1973.53 74.1825  27
  -6   6   4 1849.97 68.6851   5
  -6  -6   4 2031.41 67.3706  36
  -4   6   6 1949.60 60.4615  26
   6  -6  -4 1930.23 77.5656  41
  -4   6   6 1950.97 71.7950  28
   6  -4   6 1547.89 84.2427   6
  -6   4   6 2257.09 70.7209  21
   4   6   6 1992.86 68.9049  23
   4   6  -6 1925.16 80.0178   1
   6   6  -4 1668.27 75.1777   2
   6  -4   6 1789.78 61.7157  31
  -6  -6   4 2201.22 91.2488  11
  -6   4  -6 2392.13 87.0767  12
   6   4   6 1815.03 66.8332  30
  -6   6   4 2115.73 68.3032  26
   6   4   6 1777.41 62.0815  23
   6  -6   6 9562.82 175.641  22
   6  -6   6 8938.79 177.502   4
   6  -6   6 10830.9 215.548  16
  -6   6   6 10595.3 171.906  39
   6   6  -6 9653.01 183.444  29
  -6   6  -6 11622.2 200.143   1
   6   6   6 6831.51 215.589  12
   6   6  -6 9206.71 197.407   1
  -6   6  -6 8916.64 171.940  21
   6  -6   6 8131.41 153.963   8
   6  -6   6 11083.2 210.865  13
   6  -6   6 9676.60 179.607  36
  -6   6  -6 9067.10 174.946  26
  -6   6   6 10626.3 161.726  26
  -6  -6  -6 8785.33 156.903   7
   6   6  -6 10895.4 198.186   9
   6   6   6 8855.48 159.515  23
   6   6  -6 10602.3 225.779  19
   6  -6   6 10820.7 213.158  14
   6   6   6 10104.1 184.117   8
  -6   6   6 10654.2 191.446  17
  -6   6   6 10108.3 165.525  28
   6  -6  -6 8602.19 174.475   4
  -6   6  -6 9141.77 171.756  39
  -6  -6   6 10485.5 148.210  27
   6  -6  -6 11849.3 189.698  33
  -6  -6   6 10607.1 174.971  37
  -6   6   6 10155.8 174.548  32
   6  -6   6 9372.39 172.616  27
   6  -6  -6 10067.5 204.506  14
  -6   6   6 10055.5 211.931  13
  -6  -6   6 10308.6 209.453   3
   6   6  -6 10646.8 198.680  25
   6   6   6 11598.4 233.051   6
   6  -6  -6 9840.83 202.580   9
   6  -6  -6 9718.10 188.947  41
  -6  -6   6 10520.8 158.473  36
   6  -6   6 12288.1 201.696  24
   6   6   6 8864.84 182.892  25
  -6  -6   6 10501.2 206.971  11
  -6   6   6 11010.5 165.398  21
   6   6  -6 10434.9 184.741  40
   6   6   6 9162.83 163.869  30
  -6  -6   6 9842.74 158.968  42
  -6   6   6 9978.79 172.249  35
   6   6   6 10189.0 169.602  22
   6  -6  -6 10329.8 206.855  16
  -6   6   6 7139.95 170.052   7
   6  -6   6 9870.95 154.755  31
  -6  -6   6 10453.1 206.539  18
   6  -6   6 8332.20 204.150   6
   6  -6  -6 10760.3 180.728  34
  -7  -1  -1 759.989 38.2361  44
  -1   1  -7 1346.89 51.5063   1
  -1  -7   1 819.600 43.9483   3
  -7   1   1 797.949 31.7959   2
   1   7   1 752.747 42.3337   5
   1  -1  -7 867.794 38.7122   1
  -7   1   1 932.378 48.2384   7
   1  -1   7 742.741 37.3090   8
  -1  -7   1 784.379 40.9801   4
   1   7   1 910.397 58.2464  43
  -1  -1   7 805.416 35.8121   8
   7  -1  -1 740.412 31.6402   4
  -1  -7  -1 1052.39 47.8188   4
   7  -1   1 751.531 30.0803   9
  -1   7   1 803.699 45.0077   5
   7   1  -1 678.029 54.1030   1
  -1  -1   7 660.887 43.6260   6
   1  -7  -1 769.824 46.7223   4
   7  -1  -1 723.359 36.8056   9
  -7  -1   1 826.599 38.4065  44
  -1   7   1 756.927 53.3719  43
   1   1  -7 667.201 33.5303  10
   1   1   7 643.355 46.1031   6
   7  -1   1 706.290 54.9380   1
   1   7  -1 731.395 40.4861   5
  -7   1  -1 910.639 46.6750   7
  -7   1   1 813.671 40.5604  44
   1   7  -1 822.655 40.5397  44
  -7   1  -1 773.495 40.4683  44
  -7  -1  -1 889.127 44.7242   7
   1   7   1 805.374 46.0967   2
  -1   7  -1 943.933 43.3290  44
  -1   1  -7 717.481 38.4721  10
  -7   1  -1 788.019 36.2527   2
  -1  -1  -7 815.570 40.0436  10
   1  -1   7 619.337 46.0480   6
   1   1  -7 734.656 36.2667   9
   7   1   1 698.608 53.0661   1
  -1   1   7 632.695 42.1159   6
   7   1  -1 739.236 37.8891   9
   1  -1  -7 792.870 37.0669   9
   1  -1  -7 769.417 38.7777   4
  -1   7   1 674.581 37.2234  44
   7  -1   1 785.615 33.7129   6
  -1  -1  -7 857.036 37.9238   1
   1   1  -7 1009.10 45.7687   1
  -1   7   1 841.522 42.2531   2
   7   1   1 834.075 32.2475   9
  -1   1   7 850.652 35.2838   8
   7  -1  -1 725.709 54.4611   1
   1   1   7 1034.62 42.6106   8
  -7  -1   1 1279.37 53.1487   7
   1  -7   1 739.345 45.3022   4
   1  -7   1 783.282 42.0643   3
   1  -7  -1 876.197 44.4145   3
  -1  -7   3 12482.7 163.405   4
   7   1  -3 12099.2 174.919   9
  -7  -1  -3 12803.7 166.962  44
  -3  -1   7 13598.1 146.601   7
   7  -3   1 11877.5 149.353   4
  -3  -7  -1 11262.9 168.889   3
  -7   1  -3 14302.1 180.457  44
  -3  -1  -7 13692.5 173.458   1
   7   1  -3 10455.1 187.093   1
   7   1   3 13547.0 173.233   6
   1  -3   7 9796.61 184.914   6
   1  -7  -3 13305.2 174.942   3
   3   1  -7 12181.2 133.268  10
   3   7   1 10214.0 178.407   2
  -3   1  -7 14477.7 188.970   1
  -1   7   3 13360.7 188.850   5
   7  -1  -3 12788.5 146.600   4
   7   3   1 10993.9 201.662   1
  -1  -7   3 12821.2 174.519   3
   7  -1   3 13974.6 182.168   6
  -1  -7  -3 12757.8 174.649   3
  -3  -7   1 11667.6 170.647   3
  -1   7  -3 11571.5 163.429  44
  -1   7  -3 10743.8 173.304   2
   7   3   1 12557.5 139.176   9
  -1   7   3 13268.7 207.109  43
   1   7  -3 12904.5 165.590  44
  -7  -3   1 13381.9 176.719   7
  -1   3   7 12494.0 145.141   8
  -7   3   1 11891.6 169.438  44
  -3   7  -1 12361.1 173.079  44
  -7   3  -1 13042.9 178.974  44
  -7   3  -1 12526.5 152.679   2
   7   3  -1 15385.7 179.250   9
   1   7  -3 12384.8 150.658   1
  -7  -3   1 12351.1 164.136   3
  -3   7   1 14085.0 165.232   2
   3  -7  -1 12793.1 151.455   3
   7   3  -1 10503.6 197.672   1
  -7   1   3 10258.9 168.813   7
   3   7  -1 12665.2 157.285   1
   1   3   7 13130.2 160.073   8
   3   7  -1 11709.1 206.384  43
  -7  -1  -3 12717.3 170.501   7
   1  -3  -7 14233.1 175.515   9
  -3  -1   7 7419.83 161.608   3
  -3   1   7 13468.6 132.361   8
   3  -1  -7 13079.2 176.920   9
   1  -3   7 10009.6 157.848   3
  -7  -3   1 11843.6 154.203  44
   3   7   1 12667.2 223.515  43
   3   1  -7 12101.0 174.184   1
   1   3  -7 13232.1 181.434   1
  -1   7   3 15296.7 175.956   2
  -7   3   1 11059.4 172.076   7
   1   7  -3 11460.1 177.081   2
  -3  -1   7 13725.8 140.470   8
   7  -3  -1 11036.1 148.250   4
  -3  -7  -1 13964.8 165.060   7
  -1   7   3 10760.7 153.566  44
  -3   7  -1 11419.5 165.052   2
  -3  -1  -7 15807.2 184.819   2
   3   7   1 10244.0 150.909   5
   3  -7  -1 11799.0 179.536   4
  -7  -3  -1 12239.3 171.156   7
  -1   7  -3 11457.7 138.633   1
  -7   1  -3 14840.2 180.879   7
  -1  -3   7 10190.0 175.018   6
   7  -3   1 12114.0 140.760   9
   3  -7   1 12115.0 141.800   3
  -1  -3  -7 13724.8 167.114   4
   1   3  -7 13379.6 159.420   9
  -3   1   7 13061.5 162.074   7
   3  -1   7 9484.33 186.456   6
  -1   3  -7 12775.1 178.829   1
   7  -3  -1 12772.6 168.121   9
  -3  -7   1 13771.2 152.305   7
   1   7   3 12618.5 179.080   2
   1   7  -3 13605.9 174.884   9
  -7   3  -1 14226.7 184.172   7
  -1   3   7 9885.79 167.200   6
   7  -3  -1 10797.7 190.674   1
  -7   3   1 13130.0 138.679   2
   7  -3   1 13846.0 167.901   6
  -7   1   3 11201.1 150.058  44
   3  -7   1 10104.2 166.469   4
  -3  -1  -7 11201.3 164.279  10
   1  -7   3 12601.5 160.890   3
  -7  -1   3 12276.6 149.850  44
  -1   3  -7 12347.0 166.948   2
  -1  -3   7 8627.22 162.856   3
   7  -1  -3 11393.2 194.509   1
  -7  -1   3 11746.7 173.443   3
  -3   7   1 11878.6 181.890  43
   1  -7   3 11914.1 171.752   4
   3   1   7 11094.3 197.936   6
   7  -1  -3 12374.2 174.087   9
   1  -7  -3 12958.8 179.923   4
   1   7   3 10932.3 168.794   5
  -1  -7  -3 12734.6 168.902   4
   3  -1  -7 10429.4 155.346   4
  -7   1  -3 13921.0 173.540   2
   3   7  -1 11418.4 187.490   2
   1  -3  -7 12610.4 168.588   4
  -7  -1   3 15496.4 196.791   7
   3   1  -7 12589.5 173.752   9
  -7  -3  -1 11708.6 157.766  44
  -3   1  -7 14224.8 181.194   2
   1   3   7 11122.4 186.745   6
   3   1   7 12462.9 169.899   8
   3  -1   7 12326.0 165.809   8
  -1  -3   7 13286.0 165.137   8
   3  -1  -7 13483.3 169.405   1
   7  -3   3 48.6053 21.3019   4
   3   7  -3 70.0953 25.0941   9
   7   3   3 94.4941 18.8216  22
  -7   3  -3 69.4949 17.3134   2
   3  -7  -3 1399.40 49.7516  31
  -7   3   3 69.8015 23.5342  26
   3   3  -7 39.0568 25.2544  29
   7   3   3 27.7328 47.3216  12
  -3   7  -3 42.9480 18.3429  44
  -7   3  -3 61.4440 24.3424  17
  -7  -3  -3 176.702 22.4148  44
  -3  -7  -3 55.2584 38.6261  11
  -3   7  -3 67.3688 33.9697  39
   7  -3   3 156.549 23.6287  38
   3  -7  -3 1595.90 54.5509  33
   3   3  -7 612.701 43.4385  19
  -3  -7   3 71.7859 16.8870   7
   3   7   3 170.761 28.7700  17
   7   3   3 53.9866 17.0452  31
   3  -7   3 65.6049 35.5985  14
  -7   3  -3 53.9162 18.1610  44
  -3  -7  -3 77.9719 39.7687  18
   3   7   3 52.6595 28.9127  34
  -3   3   7 43.9124 15.5402  32
  -3  -3   7 47.6123 41.6526  11
  -7  -3   3 55.5245 14.5846  44
   3  -7  -3 3005.87 103.554  16
   3  -7  -3 3028.37 81.9400   3
  -7   3   3 31.0677 18.4675   7
   7  -3   3 47.2120 27.8606  24
   7  -3   3 42.8025 20.4680  27
   7  -3   3 31.8216 22.0417   6
  -3  -3  -7 55.3612 15.2695   7
  -3   7  -3 115.687 24.7299   2
   3  -7   3 46.2931 16.9781  27
   3  -3   7 60.2632 21.2390  36
  -7   3  -3 113.980 33.1465  21
  -3   7   3 2566.02 87.1575  40
   7   3  -3 70.7976 23.4146  41
   3  -3   7 61.7113 29.1688   6
   3  -3  -7 54.1040 22.5197  34
  -3  -3   7 191.013 20.8728  35
   3   3  -7 99.5246 23.6713   9
  -7  -3  -3 118.075 24.7282   7
   3   3   7 48.0794 14.8925  32
  -3   7  -3 63.8470 14.7388   1
   3   7   3 253.749 42.4741  43
   7  -3  -3 75.4402 27.6342  41
   7  -3   3 154.733 41.0642  15
   7  -3  -3 59.3644 21.6364   9
   3   7  -3 63.1046 25.7912   2
  -7  -3   3 102.772 28.2884   3
  -3  -7  -3 57.7171 30.0218   3
   7  -3  -3 52.9444 25.8309  33
   3  -3   7 33.5985 16.0947   8
  -7  -3   3 62.0578 20.0651  42
  -3  -3   7 204.799 22.4732  20
  -3   7   3 1603.47 66.4062   5
   7  -3   3 71.9210 20.8975  22
   7   3   3 68.3561 21.6385  33
  -3  -3   7 59.9833 15.4507   8
   3   7   3 55.5964 18.7889  23
  -3   3  -7 63.7311 18.1688   1
   3  -7  -3 2270.91 82.1547   4
  -3   7   3 1389.82 52.7520  23
  -7   3  -3 116.493 33.5904  26
  -7   3   3 135.900 20.1575   5
  -7  -3   3 66.3937 22.2834   7
  -7   3   3 60.2640 17.9390  44
   7   3   3 55.5874 24.4164   6
   3   3   7 83.5602 26.5606   6
  -3   7  -3 38.3393 27.9726  28
  -7  -3   3 67.1019 24.7257  37
   3  -7   3 77.7667 37.0239  16
  -3   7   3 1204.05 50.9054  44
  -3   3   7 50.4630 15.9945  39
   3  -7   3 78.7029 25.7921   4
   3  -3   7 55.3849 21.9497  37
   3  -3  -7 67.1008 21.4003   4
  -3   3   7 61.2691 17.3153  35
  -3   3   7 143.971 28.8752  13
   7  -3  -3 58.7155 25.9059   4
  -3   3   7 141.395 14.6041   8
   3   3  -7 572.111 40.8745   1
   3   3   7 52.4894 15.0534   8
   3   7   3 113.226 20.1090  22
  -3  -7  -3 49.3313 18.2820  38
   3  -7  -3 3061.50 104.422  14
  -3   3   7 41.6116 47.8351  11
   3   7   3 66.0678 28.6212  25
  -3  -7   3 79.0937 19.4236  36
  -7  -3   3 76.4022 23.7510  20
   7   3  -3 49.8214 21.6480   9
  -3  -3   7 28.8471 40.9732  18
  -7   3   3 66.6092 23.1834  21
   3   3   7 49.4187 16.7394  24
  -3   3   7 43.7577 48.3977  18
  -3  -3  -7 43.1426 17.1849  10
   3   7   3 33.2190 18.4383   5
   3  -3  -7 90.2701 23.5327   9
  -3  -3   7 62.7813 17.7424  37
   3   7  -3 78.8019 30.4130  12
   3   3   7 79.4213 19.8994  30
  -3   7   3 1597.65 69.9575  17
  -3  -7   3 73.0079 16.8635  27
   7   3  -3 570.662 47.4774  34
  -3   7   3 1671.02 66.2723  28
   3  -7   3 75.7627 17.5869  38
   3   7  -3 67.5156 25.9554   1
  -3  -3  -7 61.9048 21.7306   3
  -3   3  -7 63.8558 20.1289   2
   1   7  -5 11705.6 194.619   2
  -7   5  -1 16814.1 234.490  17
  -1   7  -5 14340.1 192.700  40
  -5  -1  -7 16148.8 207.514   2
   5  -1   7 11889.8 169.909  22
   5   7  -1 11523.0 204.763   2
  -1  -7   5 15087.6 210.777  14
   5   1   7 12738.9 225.477   6
   1  -5   7 13390.0 210.756  14
   7   1   5 15002.3 192.860  22
   7  -5   1 14527.7 189.760  22
  -7   1   5 15945.0 184.438  21
   5  -7   1 15509.0 182.749  38
   7  -5   1 15009.5 207.028   6
   1  -7   5 16511.6 219.744  13
   7   5  -1 14588.3 192.636   9
  -5   1   7 13746.1 169.962  26
  -5  -7   1 15369.8 214.729  18
   7  -1   5 14109.4 190.998  38
   5  -1   7 12362.7 184.146   8
   5   7   1 11952.2 224.271  12
  -1   5   7 16499.3 224.635  13
   5   1   7 13961.8 193.960   8
   5  -7   1 14218.4 218.421  14
  -5  -7   1 15873.2 183.042  37
   5  -1   7 17405.2 239.461  15
   5  -7  -1 14796.4 225.600  16
   7   5  -1 15062.8 209.669  34
  -5   1   7 11032.1 242.892  18
  -7   1  -5 14729.4 197.333   2
  -7   5  -1 14373.1 176.535   2
   5   7   1 14493.7 189.086  23
   7  -5   1 14295.1 184.159  31
  -7  -5   1 16688.6 217.636  11
   7  -5   1 13935.5 177.697  38
  -7  -5   1 14302.9 193.776   3
   7  -1   5 14930.7 181.831  32
   7  -5   1 15217.6 200.562  27
   1  -7   5 15537.7 191.603  36
  -1  -7   5 13393.7 165.643  42
  -7  -1  -5 15370.6 194.882  44
  -5   7  -1 11036.6 163.286   2
   7  -5  -1 11807.7 179.962   4
   7   1  -5 14752.9 238.889  19
   7  -5   1 13256.5 172.841   9
  -7  -1   5 12463.5 219.549  18
   1   5   7 14904.4 183.856  30
  -1   7  -5 13100.9 204.940   2
   7   5   1 15239.3 189.123  33
  -1   7   5 14413.5 181.539  30
  -5   1   7 11191.2 244.841  11
   1  -7   5 15408.6 176.036  38
  -5  -1   7 13306.7 175.536   7
  -1  -5   7 13764.9 167.448  20
   1   7  -5 15697.8 208.034  29
  -1  -5  -7 14856.1 188.111   4
   5   7  -1 13767.2 193.510  29
  -5   7  -1 13481.7 186.517  40
  -1   5  -7 14277.6 202.849   1
  -5   7   1 13100.1 191.560  44
  -7   5  -1 14714.4 204.713  26
   5   7   1 11957.4 227.907  43
   1  -5  -7 13814.4 192.544   4
   1  -5   7 13629.3 179.146  42
  -1  -7   5 15232.8 212.290  16
  -1  -7   5 12322.4 180.080   4
  -7  -1   5 11961.3 181.355   7
   5  -7   1 15102.2 190.723  27
  -7   5   1 13469.9 202.905   7
   7   5   1 13635.8 193.028  25
  -7  -1  -5 13746.4 192.865   2
   7  -1  -5 15307.6 195.254  33
  -1  -5   7 14390.6 216.196  16
   5   7  -1 13980.3 204.851   1
   5  -7   1 11686.6 190.317   4
   1   7  -5 13915.5 186.531   9
   5  -1  -7 14423.1 204.084   1
  -7  -5   1 14348.2 169.345  42
  -7  -1   5 14787.1 168.684  26
   7  -1   5 10632.6 165.659  31
  -7   5  -1 13793.3 180.832  39
  -5   7  -1 13861.3 190.316  39
  -5  -7  -1 14919.8 211.172  18
   7   1   5 13892.5 261.626  19
   5   7  -1 13044.3 177.058  41
  -1  -5   7 13487.3 166.234  35
  -5  -7  -1 14452.6 182.428  36
  -1   5  -7 14025.2 180.907  40
   5  -1  -7 15592.4 209.251  34
  -7   1  -5 15806.2 200.640  44
   7  -5   1 14890.3 251.788  15
   1  -5   7 13242.6 188.139   3
   7  -1  -5 14171.1 204.712  34
   1  -5   7 14293.8 189.220  37
   7   1   5 13742.9 216.485   6
   5  -1  -7 12487.4 178.332   4
  -5   1   7 13386.8 204.182  13
  -7  -5  -1 12550.5 177.120  36
  -7   1  -5 13413.7 186.700  26
   7   5  -1 16366.5 203.215  23
  -5  -1   7 8546.26 185.967   3
   7   1   5 12310.8 174.329  31
  -5  -7   1 13751.8 165.191  38
   5  -7  -1 12612.1 196.768   4
  -1   5   7 15256.5 172.418   8
   7   1  -5 14780.1 209.700  34
  -5  -7  -1 14775.9 209.641  11
   1  -7   5 15287.0 181.840  27
   1  -7  -5 13209.1 156.685  31
   1  -7   5 11727.9 163.910  35
   7   5  -1 13597.3 195.618  25
   5   7  -1 14453.3 205.749  25
   1   5   7 13218.7 172.278  23
   1   7   5 12578.2 179.208  30
  -1  -5   7 13934.0 197.950  13
   1  -7   5 13525.0 169.304  37
   5   1   7 17727.1 199.679  30
  -1   7   5 13147.9 177.625  23
   5  -7  -1 14630.1 223.412  14
   1  -5   7 14093.2 236.393   6
  -1  -5   7 14813.3 217.289   3
   1  -7   5 16347.8 189.282  42
  -1  -7   5 14503.0 174.154  37
   7   5  -1 15877.3 199.176  41
   5  -1   7 13987.0 179.345  30
  -5   7  -1 13999.9 201.361  44
  -5   1   7 13064.0 164.295  32
  -5   7   1 13896.9 186.977  43
   1   5   7 13079.0 171.847  28
  -5  -1   7 12756.8 190.022  13
  -7   5   1 14822.3 190.150  26
   5  -1  -7 15137.3 217.481   9
   7  -1  -5 13665.8 170.209   4
   1   5   7 15583.3 188.808   8
  -1  -7   5 14412.0 198.603   3
   7   1  -5 13479.5 193.242  41
   1  -7   5 16958.0 232.823  14
   1  -7   5 13526.2 197.973   4
   5   7  -1 16487.3 210.249   9
   5   7   1 13100.0 178.686  41
   7   5  -1 10968.5 205.487  12
  -1  -5   7 15215.8 193.471   8
   7  -5  -1 14094.3 196.527   9
  -7  -1   5 10770.5 190.803   3
   7   1  -5 15044.0 207.535  25
   1   5  -7 13412.6 194.501   2
   1  -7  -5 15174.7 205.923   4
  -5   1   7 14789.6 169.178  39
  -5  -1  -7 12452.3 184.008  10
   1  -5  -7 14686.5 200.737   9
   7   1   5 18242.0 252.597  15
  -7   1   5 14092.6 172.910  32
   1   5  -7 15000.2 197.790  40
   1   7   5 11761.0 149.135  22
   1   7  -5 14254.1 219.463  12
  -7  -5   1 14684.2 185.818  36
   1  -5   7 14014.3 205.177  13
   7  -1   5 17725.8 252.652  15
   7  -1  -5 12107.1 203.014   1
   7  -1  -5 13284.3 191.999  25
   5   1   7 13877.1 177.407  22
   7  -1  -5 14496.6 226.965  19
   1  -5   7 13117.6 191.499   8
   1   5   7 13559.2 224.809   6
   5   1   7 16539.1 213.099  24
  -5  -1   7 14802.9 170.749  21
  -5   1  -7 14148.7 201.625  10
  -5   7   1 14671.3 200.257  40
   7   5   1 12340.8 175.242  41
   7  -1   5 14547.5 209.652  24
   5  -7  -1 17756.0 191.826  33
   7  -5  -1 14685.4 182.085  31
  -5  -7  -1 12817.6 191.125   3
   1   5  -7 14028.6 176.431   9
   1  -7  -5 18049.5 238.641  16
   5   7   1 15456.9 197.296   9
  -1   5   7 13376.2 212.655   6
  -7  -5  -1 14792.8 202.898  37
   7   1   5 11139.8 156.872  33
  -7  -1   5 16507.3 199.211  20
   7  -1   5 13221.6 210.120   6
   5   1  -7 14535.7 210.280  25
  -1   5  -7 13695.6 196.324   2
   7  -1  -5 13551.1 198.356  41
   7   1   5 14401.9 179.661  30
  -1  -5  -7 16339.2 214.286   3
  -5  -7  -1 14515.8 171.963  27
   7   5  -1 15714.9 185.989  33
   5   1  -7 13055.7 172.609   4
  -1   7   5 14707.9 196.899  40
  -1   5  -7 15619.3 202.046  28
   1   5   7 12948.9 165.048  32
   5  -7   1 14344.1 220.365  16
  -5   7   1 13632.8 181.746  28
  -5  -7   1 14290.2 176.208   7
  -1  -7   5 11887.9 161.095  35
  -7   1  -5 18087.8 213.930  17
   7  -1   5 14256.9 182.689  30
   7   5   1 14456.3 193.525  23
  -5  -1   7 15371.2 171.790  35
  -5  -1   7 14586.9 168.354  26
  -5   1   7 13736.0 171.971  21
  -1   7  -5 15262.7 193.454  29
   5  -1   7 14405.1 202.786  36
   5  -7  -1 16444.9 183.243  31
  -7   1   5 16675.8 197.162  20
  -7   1   5 15651.8 181.881  26
  -1  -7   5 16138.2 189.955  36
   5   1  -7 12995.2 190.352  29
   5   7  -1 11989.5 227.175  43
  -7  -1  -5 12807.7 180.457  10
   7  -5  -1 15113.9 191.981  33
  -7   1   5 15520.0 175.095  35
  -1   5   7 10761.6 157.852  32
   1   7  -5 15093.7 201.872  40
  -7  -1   5 14890.0 170.850  21
  -5  -7   1 14805.3 185.535  36
   7   5   1 14728.6 174.307   9
   5   7   1 15498.4 181.977  22
   5   7  -1 13986.8 234.629  12
  -7   5  -1 14390.6 200.325  21
  -1   7  -5 13225.2 180.501   1
   1   7  -5 13119.9 183.384   1
  -5   1  -7 16902.7 215.412   2
  -1   7   5 13597.4 201.247  17
   7   1   5 14255.3 173.481  32
   1   5  -7 16703.9 214.330  29
  -1   7   5 14317.3 206.447  29
   7  -5   1 12456.1 181.542   4
  -7   5   1 13864.4 196.534  44
   5  -1   7 12179.7 175.043  38
  -7  -5   1 14847.7 191.420   7
  -5  -1   7 10077.6 213.926  18
  -5   7   1 13939.1 199.880   7
  -1  -5   7 14301.2 214.155  14
  -5   7   1 14124.3 214.133  17
   5   7  -1 14181.4 171.186  22
   5   7   1 14886.4 207.584  34
   1  -7   5 17257.9 236.750  16
   5  -1   7 11050.9 213.740   6
  -5  -7   1 14045.4 205.669   3
   7   5  -1 11846.5 217.316   1
  -5  -1   7 10385.8 217.935  11
  -5  -7   1 14827.3 173.945  27
  -5   1   7 14820.0 175.811  20
  -5   7   1 14132.1 191.118  39
   1   5  -7 15952.6 218.299  19
  -5   7  -1 15506.3 217.849  17
  -5   1   7 14632.9 173.645  35
   1   7  -5 14810.1 200.990  28
  -7  -5   1 16632.1 210.220  37
   5  -7  -1 13670.0 180.609  41
  -7   5   1 14772.5 190.302  21
   1  -5   7 13882.2 185.802  36
  -1   7  -5 16089.6 201.571  39
   7   5   1 10404.6 228.093  12
  -7  -1   5 14609.8 175.892  42
   1   7   5 13236.7 236.098  43
   7  -5   1 12577.9 174.785  33
  -1  -5   7 14126.8 181.732  37
  -1   5   7 11936.0 159.782  39
  -7   1  -5 12903.4 181.495  21
  -1  -5   7 13852.2 171.621  42
   5   7  -1 15218.9 205.103  34
  -5  -7  -1 14721.7 185.688   7
  -1  -7  -5 16150.5 200.963   4
  -1   5   7 13811.9 176.341  23
  -7   5  -1 14600.2 205.781  44
   7   1   5 13915.6 183.868   8
  -1  -7   5 15826.3 178.488  27
  -5  -7   1 15389.2 215.048  11
  -1   5  -7 15526.5 198.080  29
   5   1  -7 13559.2 204.868   9
   5   1  -7 16317.0 221.171  19
   7   5   1 13736.1 227.442   1
   1  -5   7 13630.6 214.170  16
   1  -7   5 15551.4 190.436   3
   5   7  -1 14751.0 183.259  23
  -1   5  -7 16458.0 220.218  12
   1   5  -7 14555.9 206.535   1
   7   1  -5 12478.5 211.953   1
  -7   1   5 8558.77 164.316   7
   1   7   5 15387.6 188.613  28
  -1  -7  -5 13367.3 193.279   3
  -5   1   7 13069.0 188.459   7
   1   5   7 14128.5 180.632  24
   1   7   5 11147.3 187.840   5
   5  -1   7 14783.6 182.561  32
  -7   5   1 13464.5 212.792  17
   7  -1   5 12732.7 183.833  22
   7   5   1 17413.1 191.154  22
   7  -5  -1 15303.0 195.995  41
  -7  -5   1 16437.3 216.133  18
   5  -1   7 15845.2 211.003  24
   5   1  -7 15117.3 202.887  34
   1  -5   7 12779.0 166.221  20
  -1  -5   7 14434.8 181.931  36
   5   1  -7 15568.8 219.693   1
  -1   7   5 13566.8 223.065  43
  -5   7   1 12742.2 163.424   2
  -1   7  -5 15596.8 230.229  12
  -5   7  -1 13277.8 180.484  28
   7  -1   5 14153.4 271.106  19
   1  -7  -5 17571.7 235.735  14
   1   5  -7 15775.8 204.750  28
   7   5   1 14166.2 200.702  34
  -1   5   7 13310.6 175.280  24
  -7  -1   5 12583.5 222.466  11
  -7   5   1 14542.8 188.869  39
  -1   7  -5 15596.3 206.300  28
  -1  -5   7 13832.9 219.451   6
  -5  -3   7 867.276 43.3084  42
  -5   3   7 815.724 53.0932   7
   3   7  -5 974.586 57.7723  40
   3   7   5 830.669 48.1194  30
   3  -7   5 840.381 69.6018   6
  -7   3   5 1028.20 47.5552  39
  -7  -3   5 828.411 45.3918  20
  -5   7   3 1214.88 56.4078  28
  -5   3   7 895.977 59.8633  13
   5   7   3 727.819 75.5420  12
   5  -3  -7 1210.10 73.0161  34
   3  -5   7 878.904 45.7397  27
  -7   3   5 938.692 47.6200  21
  -5   3   7 908.267 46.4938  35
  -7  -3   5 1004.63 72.3116  18
   3  -5   7 918.601 57.6655  13
  -3  -7   5 920.658 64.4905  18
  -3  -5   7 902.903 44.4674  36
  -3   5  -7 1083.59 61.9995  12
   7  -5   3 847.615 58.9524   6
   5   7  -3 884.569 59.5080  25
   7   3  -5 703.953 57.5895   1
  -3   7   5 904.091 53.4114   5
  -3   7   5 861.726 47.4439  35
   5   3   7 823.920 42.7015  22
  -5  -3   7 585.491 52.0179   3
   7   5   3 881.339 58.7530  34
   3   7   5 874.747 56.1015  29
  -3   7   5 804.585 43.7190  32
  -5  -7   3 921.276 43.5828  27
   7  -5   3 861.192 47.5343  38
   3   5  -7 902.019 51.3213   9
   5   3   7 768.553 58.3849   6
   3  -5   7 769.948 41.4140  35
  -5   3   7 808.029 43.2845  21
   7   3  -5 899.549 60.2439  25
  -5  -7  -3 1016.26 65.1907  18
   3  -5   7 818.972 48.2720  36
  -5   7   3 747.397 44.3978  44
   3   5   7 813.101 40.0116  32
   3   7  -5 720.230 50.3279   2
  -3   5   7 1066.29 51.9119  23
  -3   5  -7 870.215 52.7192   2
   7   5   3 876.543 47.3483  41
  -3   5   7 668.380 36.1082  21
   7   3   5 774.318 72.4504  19
   3   7  -5 854.336 51.5466   9
   7  -3  -5 941.258 51.9473  25
   7  -3   5 823.345 82.5695  19
  -7  -5   3 885.433 47.0428  36
   7  -5  -3 905.813 67.1760  16
  -3  -7   5 997.438 47.8961  36
   3  -7   5 911.836 48.4342  36
   5   3   7 912.712 48.0383  30
  -5  -3  -7 1007.58 52.0376   2
  -7   5   3 679.057 52.2405  17
  -3  -7   5 893.762 41.9909  27
  -5   7  -3 849.955 57.7464  26
   7  -3   5 1101.69 61.4616  13
  -3   7   5 893.650 49.9488  28
   5  -3   7 1020.91 62.2570  15
   7   5   3 781.032 45.5482  33
   5   3   7 719.673 55.0213  15
  -5   7   3 1061.67 50.5116  21
   3   7   5 521.618 59.6910  43
   5  -7  -3 857.829 46.3971   3
  -3   7  -5 937.835 50.4601  40
   5   7   3 825.506 53.7639  29
  -5   7  -3 735.319 45.9169   2
  -7   5   3 814.904 47.6812  35
   5   7  -3 891.355 46.8619  41
   7   5  -3 980.142 51.8361  41
   7  -3   5 924.390 49.0713  32
   5  -7  -3 927.495 70.3482  14
   5  -3   7 740.788 44.6653   8
   3  -7   5 993.708 60.9444  13
   3  -7  -5 908.430 42.1009  31
  -3  -5   7 915.490 47.4174  37
  -3  -5  -7 888.649 43.9419   7
   7   3   5 869.686 45.0321  30
   3  -5  -7 943.889 57.5318   9
  -5  -7   3 897.982 41.7406  38
  -5   7  -3 1070.27 49.1682   1
  -7  -5   3 869.236 43.0605  27
  -7   3   5 973.081 48.1572  20
   3   7   5 740.614 53.4422  17
   7  -5   3 861.081 47.8424  31
  -7  -3  -5 1047.44 51.1277   7
   7  -5  -3 849.059 54.6807   4
  -3   7  -5 925.913 57.2364  12
  -3   5  -7 839.566 52.7298  39
  -7   5  -3 788.964 49.6374  39
   5  -3   7 731.237 44.9865  22
  -3   7  -5 917.183 57.9548  39
  -5  -7   3 891.971 41.1288  42
   3  -7  -5 1080.10 71.9658  14
   3   5  -7 991.370 56.3043  40
   5  -7   3 911.848 49.5534  27
   3  -7  -5 838.796 56.6701   4
   5  -3   7 885.497 55.9323  13
   3   5   7 1219.64 55.4629  30
   3  -5  -7 839.472 53.5228  41
  -5   3   7 747.820 43.5241  32
   7   3   5 994.879 62.1169  15
  -7   5  -3 905.042 53.3627  44
   5   3  -7 1021.82 60.7522  25
  -7   3   5 883.280 46.1075  35
   5  -3  -7 746.374 48.3471   4
  -3  -5  -7 1112.09 55.3982   3
  -5   3   7 810.362 43.0342  39
   5  -3   7 697.542 60.4985   6
   3   5  -7 943.078 55.1133  28
  -7   5  -3 1921.81 67.2851   2
   7   3   5 909.224 46.8842  22
   5   7  -3 728.180 55.4125   1
   7  -3   5 757.168 45.8155   4
   3   5   7 848.314 62.8311   6
   3  -7   5 841.123 53.3786   4
   7   5   3 670.661 79.0077  12
   3  -5   7 1125.44 53.4275  24
   5  -3  -7 887.166 55.9567   9
  -3   7  -5 971.447 48.8394   1
  -7   3   5 844.012 46.8539  32
  -7   3  -5 991.689 52.8694  44
   7  -3  -5 908.576 55.0583  41
   3  -7   5 1406.06 57.1294  24
  -3  -5   7 861.349 41.0743  35
  -3   7   5 1014.23 60.0491  17
  -3  -5   7 908.734 44.7689   8
  -5   7   3 771.368 52.1337   7
   5  -7   3 914.131 66.0688  14
  -7   3  -5 796.409 48.6292  39
  -5   3   7 761.716 41.9088  26
   7   3   5 883.341 42.2304  32
   5  -7  -3 1133.76 52.9157  33
   7  -5  -3 862.675 55.0279  41
   3  -5   7 806.446 49.2364  37
  -5  -7   3 935.821 64.7799  11
  -7  -5   3 914.961 61.1381  18
   5   7  -3 982.403 69.3987  12
  -5   7   3 847.995 44.7202  23
   7  -3  -5 803.957 50.6516   4
  -5  -7  -3 816.238 40.4690  27
   5  -3   7 925.200 54.7818  36
   7   3  -5 1040.14 53.1116  41
   5  -7   3 1007.11 48.7182  38
  -5  -3   7 908.657 45.3280  20
   7   3   5 757.646 42.1868  23
   3  -7   5 991.726 65.8490  14
   5   7  -3 875.467 52.3558  40
   3   7   5 880.683 74.3706  12
  -5  -7   3 800.173 41.1342   7
   7  -5  -3 919.635 57.0453   9
  -7   3  -5 939.382 58.5966  26
  -3   7   5 803.873 45.0645  23
   3   5   7 769.817 39.0207  22
  -3  -7   5 906.050 45.4516  37
  -5   7   3 762.771 49.1562   5
  -3   7   5 875.198 54.6945  43
   3  -5   7 841.702 43.5622  38
   7   3   5 863.502 52.2584  34
   3   7  -5 882.523 56.0131  19
   5  -7  -3 743.368 55.6943   4
   3   5  -7 966.009 60.5541  29
   5   7   3 857.250 58.9062  25
  -7  -3   5 889.726 48.3753  37
  -3  -5   7 858.155 41.5626  20
   7  -5  -3 986.955 68.1469  14
   5  -3   7 852.907 46.0870  27
   3   5   7 861.884 45.8902  24
  -5   3   7 808.827 85.1023  18
   5  -3  -7 1047.62 61.2295  41
  -5  -3  -7 583.242 41.6937  10
  -7  -3  -5 902.883 47.0280  44
   5  -3   7 820.218 58.7846  14
   3   7   5 834.552 41.7011  22
   5  -7  -3 1116.25 47.4354  31
  -5   7  -3 813.172 54.3712  39
   3   5   7 798.734 44.0464  23
  -5  -3   7 739.180 67.7524  18
  -3   7   5 960.732 45.3289  44
  -5   3  -7 953.754 53.5899   2
  -5   7  -3 796.096 48.8827  28
  -3   5   7 857.150 47.1237  28
  -3   5   7 844.370 44.6434  35
   7  -3   5 833.908 49.9358  22
   7   5  -3 940.453 49.5087  23
   3   7  -5 958.431 57.3065  25
   5  -7   3 919.187 56.4663  24
   5   3   7 878.828 48.3866   8
   5   7  -3 822.139 58.1701   2
   7  -3  -5 925.221 53.0861  33
  -5   7  -3 851.040 53.1578  12
   3  -7   5 1020.98 67.0715  16
  -3   5  -7 725.549 48.6621  28
   3  -7   5 827.947 48.0185   8
  -7   5   3 1043.82 53.1849  26
   3  -7  -5 775.663 55.1347   9
  -3   5  -7 987.523 54.9934   1
  -7  -5   3 931.734 61.0960  11
   3  -5   7 802.171 47.7385   8
   7   3  -5 826.808 57.9301  34
  -3   5   7 643.042 35.0479  26
   5  -7   3 772.834 53.8429   4
   3   5  -7 931.723 56.6673   1
   7   3   5 981.771 60.3638   6
  -3  -7   5 832.634 54.4705   3
  -7  -5  -3 749.541 52.9044  37
   5  -3   7 896.872 61.8193  16
   3   7  -5 860.387 59.8617  12
  -7   5  -3 1184.08 66.3146  17
   7   3  -5 840.123 71.1627  19
  -7   5   3 689.237 51.2197   7
   7  -3   5 823.336 48.0147  38
   5   7   3 596.584 60.5836  43
  -5  -7  -3 937.432 63.4295  11
  -7   3   5 988.190 61.3853  13
   7  -5   3 841.967 51.3975   4
   7  -5  -3 876.279 49.3894  34
  -3  -5   7 1042.56 74.1573  11
  -7   5   3 703.353 43.2517  44
   5  -7   3 899.001 45.4277  31
  -7   5   3 892.405 51.6257  40
  -5   7   3 1036.96 49.6134  26
  -5  -3   7 893.640 40.3685  35
  -3  -5   7 846.244 43.3165  42
   7   5   3 864.032 41.2522  30
   7  -3   5 760.488 44.3264  31
   7   5   3 812.893 49.0916  23
   3  -7  -5 898.043 52.0901   3
   5  -3   7 814.522 42.8596  32
  -3  -7   5 839.999 41.3581  42
  -5   7  -3 891.482 52.3356  44
   7   5   3 861.225 55.2025  25
   5   3  -7 943.702 54.8790   9
  -5   7   3 779.207 53.6716  40
   7  -3   5 712.444 57.0212   6
  -7  -5  -3 820.533 47.2063   7
  -7   5   3 989.033 52.4534  21
   5  -7  -3 891.458 69.5203  16
   5   7   3 893.895 44.9807  22
   3  -5  -7 804.974 50.8572   4
  -7  -3   5 899.112 60.1329   3
   3  -7  -5 1007.06 70.9543  16
  -7  -3   5 959.580 49.3572   7
  -3  -7   5 902.552 64.1511  11
   7  -3   5 830.968 49.9244  27
   5   3   7 889.659 46.8218  24
  -5   7  -3 912.031 57.5212  21
   3  -5   7 997.161 48.8047  22
  -7  -5   3 772.945 50.5168   3
  -3   7  -5 872.216 54.9760  28
  -5   3  -7 803.226 48.8550  39
   3  -7   5 952.008 48.2802  38
  -3   5   7 893.407 60.7158  13
   3   7  -5 958.112 60.2861  29
   3   7  -5 999.782 57.5478  28
   5   7   3 644.677 52.1595  34
  -5  -3   7 735.751 67.7487  11
   5   3   7 842.685 43.5900  32
  -7   5   3 768.221 43.5032   5
  -5  -3   7 891.951 45.3133  37
  -5   3  -7 1062.58 58.5931   1
   5   3  -7 986.386 63.7845  19
  -5   7   3 873.350 49.3609  32
   3  -7   5 917.954 48.3571  27
   5   7   3 825.754 47.5589  23
  -3   7   5 903.246 46.9604  39
   5   3  -7 897.376 56.9155  29
   3  -5  -7 915.741 47.0522  33
   7  -5   3 862.429 50.7017  22
   7  -5  -3 983.724 53.4083  33
   7   5  -3 902.668 61.5418  25
  -3   7   5 840.869 54.5772  29
   7  -3   5 1028.82 69.5706  15
  -3  -7  -5 892.683 46.1300   7
  -7  -5   3 811.310 45.5274   7
   3  -7  -5 832.753 45.0110  33
  -3  -7  -5 846.702 51.4523   3
  -5   3   7 938.670 41.9296  20
   7  -5   3 1103.41 62.0909  24
  -3   5   7 830.912 47.5997   5
  -5  -7  -3 844.241 54.3777   3
   7   5   3 1251.83 53.5943  22
   7  -5   3 934.176 70.3031  15
  -5   3   7 704.849 82.8885  11
   7  -3   5 926.532 56.0585  36
  -7  -5   3 897.039 50.7052  37
  -5  -7   3 936.046 65.1104  18
   3  -5   7 779.762 63.0122   6
   5  -3   7 717.050 44.4426  38
  -7   5  -3 2135.20 75.7860  12
   7   3   5 852.372 48.1202   8
  -3  -5   7 845.475 58.7036   3
   5  -3   7 997.442 55.7849  24
   7   5  -3 786.902 71.1680  19
   3   7  -5 811.092 51.2304   1
  -7  -3   5 1055.99 74.1354  11
  -7   3   5 959.419 47.7459  26
   7   5  -3 613.044 57.4010   1
  -7  -5   3 889.483 44.6471  42
  -3  -5   7 1018.49 73.8178  18
  -7   5   3 1742.92 62.6199  39
   7  -5  -3 910.545 45.5303  31
  -7   3  -5 866.127 55.7780  21
  -5  -7   3 864.121 46.2520  37
  -5  -7   3 835.108 54.3955   3
  -3   7  -5 757.013 49.1762   2
   5   3  -7 960.014 60.2443   1
   3   5  -7 1090.83 62.6728  19
  -5  -7  -3 777.807 43.8671  36
   5   7   3 951.433 47.5607  30
   3   5  -7 893.295 56.8396  25
   7  -5   3 879.800 52.5888  27
   5   7  -3 828.003 55.7304  29
   7   5  -3 973.933 61.0863  34
   5  -7  -3 860.333 43.0479  34
   7   5  -3 1105.62 59.9704   9
   7   3   5 753.224 42.9408  33
   7  -3   5 986.133 55.6684  24
   5  -7   3 912.250 66.9067  16
  -5  -7  -5 1664.02 66.9045   7
   5   7  -5 1970.86 81.6994  40
  -5   7  -5 1660.85 75.1269  21
   5  -5   7 1578.05 68.4887  22
   5  -7  -5 1505.31 77.9969   9
   5  -7  -5 1622.31 68.4875   3
   7   5  -5 1780.89 73.7377  40
   5   5   7 2212.18 72.3715  22
  -5   7   5 1907.96 63.9733  26
  -5  -5  -7 1327.72 60.2251  10
   7   5   5 1911.92 70.7405  22
  -5  -7   5 1915.00 63.4155  27
   5  -5  -7 1847.77 82.3565  41
  -5   7   5 1598.37 62.2920  44
   5  -5   7 1712.55 85.2625  14
  -5  -7   5 1900.97 89.9164  11
  -7   5  -5 1775.47 74.2132  44
  -5  -5   7 1831.37 65.6627  42
  -5  -7  -5 1886.87 87.1654  18
   5   7   5 1327.49 102.496  12
  -7   5   5 1851.63 71.7846  35
  -5   7  -5 1504.89 67.2981  28
   7  -5   5 2120.03 85.5460  24
   5  -5  -7 1922.75 78.7840  34
   5  -5   7 1526.30 64.9076  38
  -5  -7   5 1999.74 69.1945  36
   5  -5  -7 1569.82 75.5638   4
   5  -5   7 1593.72 73.7940  36
   5   5  -7 1920.95 73.7211  28
  -5   5   7 1839.47 63.9702  26
  -7   5   5 1472.58 72.0314  17
  -5   5  -7 1940.26 85.6335  12
  -7  -5   5 1856.65 72.0502  37
   5  -7   5 1763.78 87.5251  13
  -5   7   5 2664.05 84.6415  28
  -7  -5   5 1666.06 62.9528  42
   5  -5   7 1633.99 67.7632  27
  -5   7   5 1927.70 64.8903  21
   5   7   5 1518.83 66.8573  23
   7  -5   5 1449.79 82.5646   6
   5  -5   7 1527.05 58.5849  35
   5   5  -7 1867.50 88.7014   1
   7  -5  -5 1870.73 90.4815  16
  -5   5   7 1792.80 70.2486  32
  -5  -5  -7 1565.19 62.4975   7
   5   5   7 1695.41 72.1257   8
   7   5   5 2326.82 100.602   6
   5  -5  -7 1862.94 91.3389  14
   7   5   5 941.026 63.8150  34
  -5  -7   5 1997.63 72.6165  37
   5   7  -5 1920.40 80.7657   9
  -7   5  -5 1768.38 72.0290   2
  -5   5   7 1767.53 67.0648  39
   5  -7   5 1976.71 94.9212  16
  -5  -7   5 1848.24 88.9849  18
  -7  -5   5 1926.10 88.3431  11
   5  -5   7 1495.78 66.9067   8
  -7   5   5 1951.52 69.3811  26
   5   5   7 1689.96 61.3098  32
  -7  -5   5 2000.47 68.0919  20
  -5   7  -5 1939.81 77.4494  44
   5  -7   5 1735.07 70.8542  36
  -7   5  -5 1500.45 70.7445  39
  -5   7   5 1714.85 71.7774   5
  -7  -5   5 2525.16 72.0480  36
   5   7  -5 1654.08 78.8500   2
  -5  -5   7 1663.36 58.0297  35
  -5  -5   7 1883.01 64.9936  20
   5   5  -7 1873.16 84.5070  29
  -7  -5   5 1784.61 59.6361  27
   5   5  -7 1889.27 84.9407  25
   5  -7   5 1550.73 75.0635   4
  -5   7   5 1765.70 70.9678  32
  -5   7  -5 1829.11 72.3673   1
   5   5  -7 1933.83 91.0809  19
   5  -7   5 2106.14 80.8072  24
  -7   5   5 2015.93 70.5359  21
   5   7  -5 1941.75 96.3127  19
   7  -5  -5 1842.37 89.8797  14
   5  -7   5 1481.55 67.6337  22
  -5   7  -5 1515.96 69.9745   2
   5  -7  -5 2105.78 75.3587  33
   5   7  -5 1950.55 94.3964  12
  -5  -5   7 2048.29 104.638  18
   5  -5  -7 1823.66 85.2378   9
   7  -5  -5 1649.90 81.8692   9
   7  -5   5 2010.23 90.9651  16
   7   5   5 1643.46 64.4012  30
   5  -7   5 1399.71 62.6065   8
  -5   5   7 1812.83 69.3650  28
  -7  -5   5 1913.77 88.3333  18
   5  -5   7 2298.37 85.8788  24
   5   7  -5 1811.42 83.7929  25
   5  -5  -7 2035.55 76.0534  33
  -5   7  -5 1640.87 76.0308  26
   7  -5   5 1783.49 84.8662  13
  -5  -7   5 1752.06 62.3303  42
  -5   5   7 1713.01 87.1722  13
  -5   5   7 1401.62 71.5516   7
   7  -5  -5 1978.73 76.7134  33
   7   5   5 1176.39 103.858  12
   5   7   5 1590.65 68.1772  30
   7  -5   5 1737.18 67.6774  31
   7  -5  -5 1602.67 73.6237   4
   7   5   5 1957.86 78.4995   8
   7   5   5 1693.02 78.9470  25
   7   5  -5 1782.19 83.7899  25
   7  -5  -5 1946.41 84.6943  41
  -5   5   7 1450.12 112.115  18
   7   5  -5 1860.41 104.392  19
   5   5   7 1491.90 60.3175  23
   5   5  -7 1923.38 80.5739  40
  -7   5   5 1922.24 90.2080  13
   5   5  -7 1862.02 79.3800   9
  -5   7  -5 1591.92 78.6170  39
  -7  -5   5 1886.44 88.3221   3
   7  -5   5 1568.10 67.5092  38
  -5   7  -5 1711.88 79.8315  12
   7  -5   5 1689.07 72.6310  22
   5   7  -5 1747.88 83.7787   1
   7  -5  -5 1731.92 73.8815  34
  -7   5  -5 1992.02 82.5731  12
  -5   5   7 1833.99 64.5573  21
  -7  -5  -5 1767.05 67.3071  44
   7  -5   5 1725.65 74.5585  36
   5  -5   7 1740.06 86.8146  16
  -5   5   7 2017.55 74.7888  23
  -5  -5   7 1923.20 63.0097  36
  -5  -7  -5 1880.73 86.7204  11
  -7   5   5 1852.07 69.1904  39
   5   5   7 1628.02 67.7527  30
   5  -7  -5 1539.47 73.3435  41
   5  -7  -5 1666.92 67.6314  34
   7  -5  -5 1801.80 69.0219  25
   5  -5   7 1888.99 84.6872  13
   7   5  -5 2949.46 100.351  34
  -5   7   5 1700.10 77.3563  40
  -5   5   7 2072.84 78.3713  17
   5   7   5 1668.48 75.0864  29
   5   5   7 1788.02 91.0439   6
   7  -5   5 1943.60 95.5361  15
  -7  -5  -5 1468.14 64.0005   7
  -5   5   7 1404.46 111.059  11
   5  -7   5 1574.40 92.1896   6
   7   5  -5 1640.95 88.8002   1
  -5   7   5 1840.24 84.1635  17
  -5  -7  -5 1755.54 76.2712   3
   5  -7   5 1944.37 93.5604  14
   5  -5  -7 1833.83 91.2995  16
   5   7  -5 1857.15 83.9617  29
  -5   5  -7 1444.27 70.3953  39
  -5  -5   7 2025.39 105.141  11
   7  -5   5 1631.05 72.5411   4
   7   5  -5 1748.63 75.3227  29
  -5  -5   7 1565.32 84.9105   3
   5   7   5 1484.39 80.8057  25
  -5   7   5 1814.99 70.2201  23
   5  -5   7 1355.35 86.6546   6
   5  -7  -5 1791.75 61.6860  31
   7   5   5 1591.82 66.6191  23
  -5   5  -7 2018.63 83.8409   1
   7   5  -5 2007.23 73.0743  41
  -7   5   5 1963.13 74.6508  32
   7  -5   5 2019.91 90.1291  14
   5  -7   5 1660.20 61.4276  31
  -5   5  -7 1688.97 73.9703   2
  -7   5   5 1191.77 71.0198   7
  -5  -7   5 1679.04 77.5845   3
  -1  -7   7 154.031 26.8624  35
   7  -7   1 156.328 60.6191  15
   7   7  -1 194.584 45.3784  25
  -1   7  -7 261.396 44.7220  28
   1   7   7 133.358 32.5039  17
   1   7   7 150.849 26.5783  28
   1  -7   7 208.987 37.0934  13
  -1  -7   7 226.693 39.9306  14
   7   7  -1 282.541 40.7274   9
   1  -7   7 151.478 25.6611  27
  -1   7  -7 130.216 37.9064  12
   7   1  -7 153.901 37.4553  29
  -1   7   7 117.728 22.2917  32
   7  -7  -1 117.874 39.1826   4
  -7   7  -1 190.007 40.3840  17
   7   7  -1 85.3404 46.1206   1
   7  -1  -7 168.999 47.3791  19
   1  -7   7 133.081 24.7702  38
   1  -7   7 126.927 27.0863  37
   1   7  -7 164.804 35.0927   2
   7  -7   1 172.424 29.7285  22
  -7  -7   1 124.226 33.9611   3
   7   7  -1 163.186 31.4701  23
   7   7   1 186.749 42.6961  25
   1  -7  -7 148.496 32.3718   3
  -7   1   7 120.875 63.2232  18
  -1  -7   7 166.227 25.2766  27
   7  -1   7 219.643 64.1981  19
   7  -1   7 118.966 37.4775   6
  -1   7   7 127.974 30.1738  28
   7  -7  -1 127.269 55.3018  14
   7   1  -7 139.555 42.8939  25
   1  -7   7 148.567 40.1482  16
  -1   7  -7 177.843 39.9368  39
  -7  -1   7 152.065 30.9026  20
   1  -7   7 139.369 28.6245   8
  -1   7   7 227.328 43.5270  13
   7  -1  -7 126.843 35.9478  41
  -7  -1   7 81.8170 52.0003  11
   7   7   1 161.046 25.8248  22
  -7  -7  -1 130.645 44.9003  11
   1   7  -7 133.520 40.3246  28
  -7  -1   7 138.150 24.2082  21
   1   7   7 370.018 31.0609  32
  -7   1   7 352.319 33.8330  26
   7   7  -1 146.950 48.3625  12
  -7  -1   7 132.297 22.3694  35
  -1   7   7 139.045 33.1267  17
  -1  -7   7 325.213 56.3095  11
  -1   7   7 124.215 24.1515  35
   7   1  -7 119.624 34.2159   9
   7   7  -1 175.475 34.2493  41
  -1  -7   7 283.319 40.8166   3
  -7  -7   1 158.588 30.8206   7
   1  -7   7 130.480 26.6507  35
  -7   1   7 151.492 24.0393  35
  -7   7   1 149.453 38.4425  17
  -7  -1   7 163.695 24.6626  26
  -7  -7   1 140.183 46.8543  18
  -7   7   1 185.980 35.8721  21
   7  -1  -7 122.390 38.7629   1
   7  -7   1 158.957 52.9925  16
   1   7   7 162.022 39.7137  29
  -7  -7  -1 344.297 33.4106  27
   7  -1  -7 156.882 34.6294   9
   7   1   7 311.913 28.8472  33
   1  -7  -7 123.472 35.3154   4
  -1  -7   7 337.694 55.5839  18
  -1   7  -7 115.544 33.1509   2
   7  -7   1 144.831 37.8166   4
  -1   7  -7 148.926 37.3868  29
   7  -1   7 121.811 26.3758  22
   7   1   7 117.932 23.3343  31
   7   1   7 167.277 58.8931  19
   1  -7   7 130.227 27.3800  42
  -7   7  -1 194.882 27.4878   2
  -1   7  -7 140.764 33.3080  40
  -7   7  -1 135.198 27.7134  44
  -7   1   7 197.147 25.9918  42
  -7  -1  -7 93.0625 28.5612  10
   7  -1   7 201.273 43.9595  15
   7  -1   7 86.7018 22.8827  31
  -1  -7   7 163.986 41.7879   6
   7   7  -1 132.669 61.0278  19
   7   7  -1 105.243 38.8900  34
   7   1  -7 136.669 43.6372   1
   7  -1  -7 135.885 39.7614  25
   1   7   7 141.599 27.7664  30
  -1  -7   7 227.870 40.4540  16
  -7   7  -1 151.407 39.0182  39
   1   7  -7 166.920 43.1040  29
  -7   1   7 92.4396 30.0819   7
  -7  -7  -1 152.234 33.4400  37
  -7  -7  -1 183.471 33.9805   7
   7   1  -7 151.434 52.3771  19
  -7   1   7 170.062 28.3433  20
   7   1   7 154.044 27.4872  32
   1   7  -7 186.475 43.4792  12
   1   7   7 146.507 22.1872  22
  -7   7   1 153.216 34.5661  26
   7  -7   1 139.783 28.9181   9
   7  -7  -1 168.596 33.9317  33
   7   7   1 149.154 60.0864  12
   7  -7   1 163.321 33.4386  33
   1   7  -7 127.565 34.9614  19
   7   7   1 135.731 34.3252  41
   7  -7  -1 145.873 27.5929  31
   7  -1   7 144.187 28.3666  38
   7  -7   1 124.680 25.0209  38
  -7   7  -1 161.085 38.7862  21
  -7   7   1 143.724 36.6218  39
  -7  -7  -1 148.156 36.6809   3
  -1  -7   7 176.967 28.5592  36
  -7  -1   7 54.7276 36.0404   3
  -7  -1   7 164.329 26.3256  37
  -7   1   7 164.972 35.9249  13
   7  -7  -1 123.098 31.7781  41
   7   1   7 158.168 42.3688   6
   7  -1   7 133.273 24.2144   8
  -7  -7   1 207.914 28.3119  27
  -7   1  -7 137.158 27.4030   2
   7  -1   7 129.291 30.3766  24
  -7  -1  -7 166.964 29.4649   2
   1   7  -7 177.396 36.9242  40
  -7  -7  -1 164.018 47.1445  18
   7  -1  -7 153.096 40.6449  34
   7  -1  -7 266.561 33.2708   4
   7  -1   7 169.343 29.2925  32
   1   7  -7 136.562 31.7276   1
  -1   7   7 159.269 30.2079  23
   1  -7   7 147.727 43.0867   6
  -1  -7   7 548.779 40.8598  37
   7  -7  -1 132.107 56.4909  16
   1   7  -7 145.838 36.7687  39
   7   1   7 112.143 25.7395  22
   7   7   1 246.298 36.5431  23
   1  -7  -7 149.248 32.8711   9
  -1  -7   7 136.828 31.4829  13
  -1  -7   7 211.982 29.4255   8
  -7  -7  -1 142.147 31.2915  36
  -7   7  -1 163.961 38.6111  26
   7   1   7 168.681 40.8194  15
   7   7   1 149.368 27.8405  33
   7  -7   1 164.520 51.7353  14
  -1   7   7 145.184 31.4464   5
   1  -7  -7 184.399 48.3391  14
   7   1  -7 127.254 44.3388  34
  -7   1   7 103.922 62.3674  11
   1   7   7 142.526 30.3392  23
  -1   7  -7 149.867 30.8705   1
   1  -7   7 193.389 40.3598  14
  -7  -7   1 153.248 48.4614  11
  -1  -7  -7 232.003 38.3694   3
  -7   7   1 175.647 30.9984  44
   1   7   7 139.374 27.3847  24
  -7  -1   7 120.469 29.3667   7
  -7  -7   1 139.661 26.9256  38
   7   7   1 176.896 33.7419   9
  -7   1   7 319.075 32.3584  21
  -7  -1   7 85.1702 51.5779  18
   7  -7  -1 119.173 31.7377   9
  -1   7   7 359.749 31.7755  39
   7  -7   1 174.610 30.9006  27
  -7  -1   7 180.003 28.2220  42
   7   7  -1 125.704 38.1419  29
  -1  -7   7 147.060 26.4935  42
   7   1   7 166.571 31.8422  24
   7   1   7 148.902 25.9819   8
   1  -7  -7 153.300 47.6263  16
  -7  -7   1 144.839 29.9167  37
   7   7   1 224.422 48.4522  34
   7  -7   1 163.277 28.6051  31
   3   7   7 5161.81 124.073  30
   3   7  -7 5189.08 125.477   9
   3  -7  -7 4237.93 120.719  41
   7   7  -3 4741.07 123.462  29
   7   7  -3 5760.20 141.831  34
   7   7   3 5066.13 140.384  25
  -7   3   7 5143.60 118.080  35
   3   7   7 4070.55 127.920  17
   7   7   3 3668.74 165.482  12
  -3   7   7 4942.52 126.674   5
   7  -3   7 5009.57 134.245  36
   7   3   7 4856.76 123.807   8
   7  -7  -3 5390.77 115.292  31
  -7   3  -7 4239.99 108.342  39
   7  -7   3 5070.14 147.404  14
  -7   7   3 3859.08 106.992  44
  -7   7  -3 4467.83 111.960   2
   7  -7   3 4962.46 124.126  22
  -7   7  -3 5176.48 132.996  21
   3  -7   7 4961.56 113.804  38
   7  -3  -7 5332.61 136.601  41
   3   7   7 4667.81 100.045  32
   7  -3   7 4636.50 117.698  27
  -7   3   7 5464.60 119.979  32
  -7  -7   3 4716.84 128.425   3
  -7   7  -3 4955.90 128.924  44
  -7  -3   7 5093.77 111.614  42
  -7  -7   3 5033.87 105.433  42
   7   7  -3 5651.52 137.873   9
   7   3  -7 5293.83 138.614   9
   7   3  -7 5605.11 139.201  34
  -7   7   3 4943.88 117.424  39
  -7   3   7 3353.37 112.801   7
  -7  -7   3 5304.47 122.178  37
   7  -7  -3 4876.77 142.929  16
   7  -7  -3 4534.53 127.015   4
  -3   7   7 5381.25 116.768  35
  -7   7   3 3902.91 127.506  17
  -3  -7   7 5642.74 148.948  11
  -3   7  -7 4970.34 140.895  12
   3  -7   7 7037.38 135.758  24
   7  -7  -3 5290.25 122.593  33
  -3  -7   7 5587.35 118.808   8
   7  -3   7 6019.47 145.446  13
   7   7   3 5201.57 129.140  23
  -7   3  -7 5271.22 129.169   2
   3   7   7 4675.04 101.838  22
   3   7   7 4284.10 100.100  28
   3  -7  -7 4913.23 114.280  33
   7  -3  -7 4584.50 120.595   4
  -7   7  -3 4684.53 122.696  39
   3   7   7 4425.29 111.779  23
  -7  -7   3 5377.91 148.343  11
   7   7   3 5914.31 127.553  22
   7   3  -7 5526.34 144.475  25
  -7   3   7 5145.01 116.019  21
  -7   3   7 5125.01 115.120  26
   3   7  -7 5136.62 137.252  29
  -7   7   3 4425.61 113.331   5
  -3   7   7 5248.52 116.333  39
   3  -7  -7 5085.81 129.336   3
   7  -3   7 4520.12 106.961  31
   7  -7   3 5046.34 151.745  15
   7   3   7 5308.90 122.132  22
  -7  -3  -7 5576.40 130.386   2
  -3  -7   7 5659.66 122.715  36
   3  -7  -7 5536.68 153.988  14
   7   3   7 4756.42 158.637  19
   7  -3  -7 5494.88 139.456  34
   7  -7   3 4336.44 122.806   4
   7   7  -3 3861.19 126.379   2
  -7  -3   7 5781.91 122.613  37
   7  -7   3 5699.46 143.895  24
   3  -7   7 4540.76 120.381   8
   7   7  -3 4088.25 146.579  19
   7  -7   3 5125.42 118.975  31
  -3  -7  -7 5327.02 125.666   3
  -7   3   7 6219.51 122.753  39
   7  -3   7 6484.00 168.014  15
   7   7  -3 3822.43 130.752   1
   7   7   3 3213.54 131.552  43
   3  -7   7 3990.23 104.402  35
   3  -7   7 4732.52 119.327  37
   3  -7   7 5207.41 162.980   6
   7   7  -3 5620.08 126.528  41
  -3   7  -7 5395.29 130.601   1
  -7   7   3 5932.93 128.993  21
  -7   7   3 5594.52 131.723  40
  -3  -7   7 4962.71 110.904  42
   3  -7   7 4971.09 123.225  36
  -7  -7   3 5129.15 111.555   7
   3  -7   7 5603.89 147.116  13
  -3   7   7 5434.74 125.790  28
  -3  -7  -7 5168.37 115.675   7
  -3   7  -7 4042.45 120.004   2
   7  -3   7 4461.48 117.783  22
   7  -3   7 4710.82 122.475  38
  -3  -7   7 5260.53 119.180  37
   3  -7   7 5627.28 156.779  16
   7   3   7 5262.21 118.023  32
   7   7   3 5074.87 142.931  34
   3   7   7 4954.40 131.161  29
   3   7  -7 5641.92 133.792  28
   3  -7   7 5463.19 152.846  14
  -7   7   3 5988.66 128.588  26
  -3   7  -7 5194.94 132.077  39
  -7   7  -3 4941.85 128.101  12
  -3  -7   7 5667.05 107.624  27
  -7  -3   7 4278.65 151.087  18
  -7  -7  -3 4530.00 114.333  36
   7  -7   3 5339.44 129.115  27
   7   7   3 5075.62 111.555  30
  -7   7   3 4202.57 126.416   7
   7  -3  -7 4702.06 128.568  25
  -3  -7   7 5667.62 149.177  18
   7  -7  -3 4712.07 106.856  34
  -3  -7   7 4669.35 102.142  35
   7   7  -3 4721.22 150.108  12
  -7   7  -3 5576.91 145.752  17
  -3   7   7 4482.32 110.556  32
   3  -7  -7 4775.62 130.122   4
  -7   3   7 4507.89 133.879  13
  -3   7   7 6075.71 143.360  17
   7  -7   3 4735.81 116.070  38
   7  -3  -7 5554.41 150.555   9
   7  -7  -3 5175.01 129.745  41
  -7  -7   3 5270.72 116.113  36
   3  -7  -7 4704.89 131.429   9
   7  -3   7 6422.15 154.565  24
  -3   7  -7 4710.67 126.462  28
   7   3  -7 4906.16 128.295  29
  -7  -3   7 4476.83 154.964  11
   7  -7  -3 4676.20 130.772   9
   7  -7  -3 4931.65 143.873  14
   7   3  -7 4866.56 143.570   1
   7  -3   7 4242.78 141.341   6
   7   3   7 4372.77 138.339   6
   7  -3   7 5843.57 124.100  32
  -7  -3   7 3575.15 124.449   3
   3  -7   7 4817.92 115.200  22
  -7   7  -3 5301.42 135.758  26
   3   7  -7 5316.31 142.313  19
  -3   7   7 5863.48 155.793  13
   3  -7   7 4812.65 114.981  27
   7  -3  -7 5596.84 130.840  33
   7  -7   3 5128.09 149.163  16
  -3  -7   7 5904.41 153.159   3
  -7  -7  -3 4637.61 115.647   7
   3   7  -7 5196.46 135.079  40
   3  -7   7 4394.74 126.288   4
  -7  -3   7 5528.85 119.495  20
   7   3   7 5076.87 121.327  30
   7   3  -7 5844.31 169.885  19
  -7  -7   3 5226.99 110.754  27
   7   7  -3 5092.00 142.749  25
   7  -3   7 4260.55 109.055   8
   7  -7   3 4818.63 145.559   6
  -3   7   7 5370.64 124.064  23
  -7   3   7 5664.90 111.767  20
   7   3   7 6448.79 165.322  15
  -7  -3  -7 3749.05 103.846  10
   3   7  -7 5169.67 134.547   1
   3  -7  -7 5523.57 154.416  16
  -7  -7   3 5379.84 148.517  18
  -7   7  -5 10156.8 182.445   1
   7   5  -7 7113.05 162.492  29
   7  -5   7 7931.63 185.210  14
   7   7  -5 7259.07 166.646   9
  -7  -7   5 7708.63 141.373  42
   7  -5   7 7087.69 157.165  38
  -7   5  -7 7180.98 159.240   2
   7  -5  -7 7565.40 160.276  33
  -7   7   5 5143.65 150.546   7
   5  -7   7 6876.98 150.369  27
   7   7  -5 6427.75 172.538   1
   5   7   7 7301.65 157.153  30
   7   5   7 6366.52 136.110  23
  -7   5   7 4681.84 143.184   7
   7   7   5 6797.71 154.730  23
   7   5   7 7592.18 141.800  32
   7  -7  -5 7543.68 152.007  34
  -7  -5   7 6821.04 174.556   3
  -5   7  -7 8127.23 168.365   1
   7  -7   5 7262.36 160.101  27
  -5   7   7 9132.39 185.019  17
   7  -7   5 8152.30 195.182  14
  -7  -7   5 7605.16 138.358  27
   5  -7   7 6822.71 157.317  36
   5  -7   7 10557.2 191.408  24
   5   7  -7 7330.69 183.184  19
   7   7  -5 6924.94 172.269  25
  -7   5   7 7595.71 155.578  35
   7   5  -7 7701.10 166.617  40
  -5   7   7 7815.91 156.073  28
  -5   7  -7 6587.81 144.760  28
   5  -7   7 7805.14 196.180  16
  -7   7  -5 6758.97 158.871  39
   7   5  -7 8651.80 180.655   9
  -7  -7   5 6465.84 156.553   3
  -5  -7   7 7952.57 145.673  36
   5  -7  -7 7077.53 157.061   3
  -7  -7   5 7667.29 183.275  11
   7  -7   5 7221.98 186.983  13
   7   5   7 7725.02 154.727  22
  -7  -5   7 7804.52 146.396  20
  -5   7  -7 5978.39 149.378   2
  -7  -5   7 8511.96 215.714  11
  -7  -7  -5 5422.63 128.787  36
   7   7   5 7721.59 155.907  22
   5   7  -7 7437.14 180.991   1
   7  -5  -7 7412.45 181.060  16
   5  -7  -7 8834.95 167.119  33
   7   5   7 7299.78 161.378   8
  -7   5   7 7411.25 184.820  13
  -5   7   7 7811.43 154.950  35
  -7   7   5 7923.53 154.764  39
  -5   7  -7 6978.00 175.089  12
   7   7   5 6828.37 171.660  25
   7   5   7 7055.41 150.959  30
   7   5  -7 7715.63 209.022  19
   7   5  -7 7826.30 179.536  25
   7  -5  -7 7428.60 180.743  14
  -7  -7   5 7572.96 182.063  18
  -7  -7  -5 6154.81 138.268   7
  -7  -5   7 8062.63 158.255  37
   7  -5   7 8671.19 159.609  32
   7  -5   7 7170.17 137.209  31
  -7   5  -7 6126.30 152.318  26
   7  -7  -5 6359.35 153.330   4
   7  -7  -5 7205.20 181.713  14
  -7   5  -7 6322.35 146.193  39
  -7   7   5 8067.06 147.070  26
  -5   7   7 7950.45 136.869  26
   7  -7   5 6994.13 150.772  38
   5   7   7 5865.70 199.842  12
  -7   7  -5 6925.85 157.017  44
   5  -7   7 6446.71 189.854   6
   7  -5  -7 6331.54 152.163   4
  -7   5   7 7814.26 150.291  39
   5  -7   7 6235.66 143.158   8
   7   5   7 6056.42 161.978  15
   5   7  -7 8014.76 174.559  40
   7  -7  -5 7185.96 168.514  41
  -7   5  -7 9047.34 185.855   1
  -7   5   7 7818.14 156.751  32
  -5   7   7 8102.15 139.190  21
  -5  -7   7 8211.53 157.415  37
  -5  -7   7 7568.91 142.521  42
   5  -7   7 6741.10 150.245  22
  -7   7  -5 6580.02 148.237   2
  -7   7   5 6081.38 164.065  17
   5   7  -7 7788.02 176.767  29
   7  -7   5 6240.26 176.184   6
   5   7  -7 7453.43 163.394   9
   5  -7   7 6932.45 148.111  38
   7   7  -5 8746.67 170.341  40
   5  -7  -7 8131.84 163.411  34
   7  -5  -7 7738.29 182.266   9
   7  -5   7 6946.13 164.410  36
   7   7  -5 7098.56 163.602  29
  -7   7  -5 6834.67 160.408  21
  -7   5   7 8077.30 151.101  21
   7  -7   5 6655.32 155.182  22
   5   7  -7 8040.70 176.585  25
   5  -7  -7 7053.18 172.680   9
  -5   7   7 7362.38 150.282   5
   7  -7   5 7282.93 157.807  36
   7   7  -5 6979.59 196.703  19
   7  -5   7 7980.08 187.553  16
   7  -5   7 7216.21 159.914  22
  -7  -5  -7 6047.74 131.682   7
  -7   7  -5 7068.42 164.981  26
   7  -7  -5 8126.52 162.064  33
  -5   7  -7 6754.02 158.626  39
   5   7   7 7456.86 146.750  22
   7   7   5 5802.72 160.326  34
  -7   5  -7 8354.09 184.919  12
  -5   7   7 7982.39 157.078  32
  -7  -7   5 8118.92 147.240  36
   7   5  -7 7050.84 183.151   1
   7  -7   5 7577.01 146.902  31
  -7   7   5 7888.07 156.846  35
   7   7   5 4841.27 197.147  12
   7  -7   5 8034.30 194.651  16
   7  -7  -5 7037.54 180.315  16
  -7   7   5 8045.08 147.961  21
   7  -5   7 9855.05 200.467  24
   5  -7  -7 6700.41 167.963  41
   7  -5  -7 6866.25 156.243  25
   7   5   7 7755.85 197.363   6
  -5   7   7 7234.48 186.917  13
  -7   5  -7 5871.57 148.534  21
   5  -7   7 7825.59 194.087  14
   7   7   5 6951.30 146.648  30
  -5  -7  -7 6907.81 141.685   7
  -5  -7   7 7862.64 132.687  27
   7  -5   7 7416.48 179.701  13
  -7   5   7 7804.36 147.857  26
   7  -5  -7 8368.43 188.522  41
   5   7   7 6471.21 144.936  23
   7  -7   5 6733.09 158.758   4
  -7  -7   5 8076.10 158.809  37
   5  -7   7 6644.90 160.701   4
   7  -5   7 7129.86 155.485  27
  -7  -5   7 7797.07 146.791  42
  -7   7  -5 7405.01 170.018  12
  -7  -5   7 8362.66 213.255  18
   7  -7  -5 7091.59 174.180   9
   7  -5   7 6263.47 179.189   6
   7  -5   7 8381.66 197.967  15
   7   7   7 35.5550 37.2870  30
   7  -7   7-5.45204 32.5932  27
   7   7   7-23.6543 110.680  12
  -7   7   7 5.50695 32.9362  28
  -7   7   7-13.5835 37.6047  35
   7  -7   7 80.2040 64.0686   6
  -7   7   7 1643.56 127.051  32
  -7   7   7 34.6335 33.6983  21
  -7   7   7 26.4595 33.0658  26
  -7   7   7 0.80509 33.6704  39
   7  -7   7 15.8138 30.9331  38
  -7   7   7 455.616 113.625  17
   7  -7   7 17.8751 35.0910  22
   7   7   7 75.5926 32.4019  22
   7  -7  -7-58.0602 61.3431   4
  -7  -7  -7 9.49775 34.3427   7
   7  -7   7 30.7737 51.9458  13
  -7   7  -7-0.96541 31.5230   1
   7  -7   7 50.6524 57.7522  14
   7  -7  -7 23.3097 43.2761   3
   7  -7   7 8.79186 59.4361  16
   7  -7   7 7.85846 41.2041   4
   7  -7  -7 67.9664 42.8201  34
  -7   7  -7 3000.89 138.301  39
   7   7   7 24.6449 39.2008  23
   7  -7  -7 203.663 62.9477  33
  -7   7  -7 1437.14 107.217  26
   7  -7   7-8.77515 41.3575  36
   7  -7   7 158.174 46.6760  24
  -7   7  -7 1479.45 105.816  21
   7  -7  -7 16.7839 49.0976  41
   0   0  -8 84791.9 566.997  10
   0  -8   0 80632.1 569.455   3
   8   0   0 65442.1 636.310   1
   0   8   0 81291.4 577.675  29
   8   0   0 74729.1 567.455  33
   0   8   0 77611.7 588.941   5
   0   0  -8 85250.1 568.600   1
  -8   0   0 80053.8 569.476  44
   0  -8   0 76817.3 571.468   4
  -8   0   0 80309.2 576.041  42
   0   0   8 62825.9 586.784   6
  -8   0   0 93283.3 625.427   7
   8   0   0 73664.4 526.594   9
   0   8   0 71021.8 562.487  44
   0   8   0 78612.1 561.583  30
  -8   0   0 87453.3 602.465  20
   0   0   8 86320.3 558.016   8
   0  -8   0 93286.4 552.206  38
   0   8   0 94696.0 639.758   2
  -2   0   8 6.84483 11.3343   8
   2  -8   0 35.2477 15.7102  38
  -8   0   2 151.960 29.8727  20
   0  -8  -2 5.74136 14.1042  31
   8  -2   0-4.66402 33.3513   1
  -2   8   0 9.03109 24.8566  40
   0   8   2 134.003 25.7502  30
  -8   0   2 17.1894 20.5290   7
  -2  -8   0 22.4107 17.8119   7
   2   0  -8 0.43160 13.4519  10
   2   8   0 202.356 33.3718   2
  -8  -2   0 84.1733 24.5780  42
   0   8  -2 0.56499 26.6472  29
   0   8  -2 2.95501 29.0431  12
  -2   0  -8 11.5614 14.3067   1
  -2   0   8 4.81526 14.0190  20
   0   8   2-6.01229 23.4100  28
   0   2   8 8.89244 11.8995   8
  -2   0  -8 4.57842 17.8041  10
  -2   8   0 1.16638 19.8558   2
  -8   2   0-5.70182 26.1910  21
   0  -2  -8 12.1082 16.4706   4
  -8   2   0 117.359 17.6975   2
  -8   2   0 17.4611 21.7769   7
   8   0   2 10.9496 15.4257  22
   0   2   8 3.67936 21.7537   6
  -2  -8   0 211.656 22.9795  27
   0   8  -2 6.53080 26.3869  40
   0  -8   2 29.4971 15.6312  36
   0   2  -8 3.58818 15.8697   1
  -8   0  -2 4.45530 13.7938   2
   2   0   8 1.78612 26.9938   6
   8   0  -2-1.05448 48.9604  19
   2   8   0 18.9251 21.6642  30
  -8  -2   0 6.69769 13.6017  44
   0  -2   8 1.40060 15.0825  20
   0  -8  -2 17.3443 28.4132   4
  -8   2   0 7.21238 26.4324  26
  -2   0   8-9.21686 53.3588  18
   8   0  -2-7.08712 18.1814   9
   8   2   0 64.0198 25.2415  33
   2   8   0-6.76710 19.3785   5
   0  -2   8 5.64169 23.0753   6
   0   8   2 13.3618 30.4027  43
   0  -8   2 42.0781 26.6328   3
   8  -2   0 54.2279 16.3815   9
  -2   0   8 50.1850 16.1272  35
   8   0  -2 4.59904 23.8844  33
  -2   0   8 46.1406 14.8448  26
   0  -2   8 9.37319 12.2404  35
   0  -2   8 3.02028 24.0527  14
   8   0   2-5.01776 24.4828  33
   0   2  -8 131.722 24.1227  10
   8   2   0 18.1185 21.0441  23
  -2   8   0 21.6186 26.3708  28
   2  -8   0 9.66865 29.3973   4
   2   8   0 256.917 46.0823  25
   0  -8  -2 6.23718 24.6920   3
  -8   2   0 15.7402 24.3721  42
   0   2   8 23.5642 13.3964  32
   0   8   2 26.9871 21.7057   2
   2  -8   0-18.7498 43.3787  14
   0  -2   8 24.4953 15.0206   8
   8   0  -2 17.9835 30.9039  34
   0  -8   2 6.79605 12.8896  27
   0  -2   8 20.6233 19.1728  13
   8  -2   0-22.3101 49.6505  15
   8   2   0 11.2497 16.7098   9
   2   8   0-0.61402 30.1798  29
   2   8   0 190.647 42.5149  12
  -8   0  -2 9.87166 35.5488  20
   0   8   2 20.6918 19.4737  23
   2   8   0 20.4875 34.4350  43
  -2  -8   0 15.6747 17.2665  38
   0  -2   8-0.76563 25.0316  16
  -8   2   0 89.5620 20.6017  44
  -8  -2   0-2.39576 18.5281   7
   8   2   0 14.2454 31.4812  34
  -2   0   8-0.67867 19.2159  13
   2   0   8 10.7637 21.5439  15
  -2   0   8 74.2695 16.6141  21
  -8   0  -2-1.14210 16.3499  44
   2   0  -8 77.6355 20.5965   1
   2  -8   0 4.36846 23.5703   3
   2  -8   0 4.36900 41.3733  16
  -8   2   0-6.60949 31.1446  20
   2   0  -8 3.51700 23.2321  25
   0   8   2 2.71525 18.7377   5
   0   8  -2 12.0095 17.0451  44
   0   8   2-3.91350 21.4325  17
   0  -8   2 39.1242 23.6561   4
  -8   0   2 2.53755 14.7845  44
   2   8   0 3.96358 15.7462  22
   8   0   2 5.83620 48.8484  19
   0   8  -2 23.1014 29.5759  28
   2  -8   0 109.356 19.6957  31
   2   0   8 3.44640 12.8924  32
  -8  -2   0 3.72327 31.9696  20
   0   8   2 10.4874 23.8241  29
   8  -2   0 18.2214 18.0742  31
   8   0   2 14.7381 17.0630  31
   2   0  -8 0.51720 16.3579   9
   8   0  -2-13.8878 36.0998   1
   0   2  -8-5.39431 22.5285  29
  -8   0  -2 25.0424 23.1930  17
   0  -2   8 45.2290 20.4085  37
   0  -8  -2 57.5774 17.5675  38
   8   2   0 39.1298 23.5657  41
  -2   8   0 4.76805 16.2953  44
  -2   0   8-8.12047 53.7274  11
  -8   0  -2 12.8473 20.7015   7
   8   2  -2 3359.91 123.951  19
  -2  -2   8 2246.79 91.1232   3
   2   8  -2 4582.23 107.704  40
  -2   8  -2 3369.54 97.7594   2
   8   2   2 3346.84 88.8740  23
  -2   8   2 3968.30 102.978  40
  -8  -2   2 3748.67 86.3658  44
   8   2  -2 4367.75 101.509   9
  -2   8  -2 2915.47 88.4542  44
   8   2  -2 3189.89 115.694   1
   8  -2  -2 3299.23 113.734   1
   2  -2  -8 4212.53 98.2493   9
   2   8   2 3812.98 109.312   2
   2   2  -8 3427.05 95.4278  29
  -2   8   2 3695.70 94.4039  44
  -2   8   2 5094.45 107.490   2
   2   8   2 3630.43 81.8700  22
   2   2   8 2949.53 102.126   6
  -2   2   8 3913.29 84.2110  39
  -2  -8   2 4603.16 91.3383  38
   8  -2  -2 3712.14 98.1938  33
  -8   2   2 3635.71 95.3343  17
  -2  -8   2 4152.55 85.3318  27
  -8  -2   2 4467.32 105.558  37
  -2   2   8 3739.98 81.2019  35
  -2  -8   2 4135.59 107.910  11
   8  -2  -2 3867.18 95.4577   9
   2   8   2 3785.56 87.8344  23
   8   2  -2 4005.58 107.763  34
  -2  -2   8 4178.55 88.1827   8
  -2  -2   8 2693.58 108.044  11
   2  -8   2 4293.00 118.035  16
   2   2   8 3416.88 80.0829  32
  -2  -2   8 4230.87 85.9800  35
  -2   2  -8 4160.01 101.484  10
  -2  -2  -8 4410.60 96.0119   4
   2  -2  -8 4331.65 100.605  34
   2  -8  -2 3972.36 78.7823  38
   2   8  -2 4075.10 104.721  29
   8  -2  -2 3720.58 129.430  19
   2  -8  -2 4192.84 85.1497  31
  -8   2  -2 5034.14 111.118   7
   2   8   2 3072.63 90.4140   5
  -8   2   2 3948.37 94.2513  20
  -2   2   8 3393.96 77.2919  21
   2   8  -2 4018.89 98.7972  25
   2  -8   2 3896.07 86.8275  27
   2   2  -8 4820.56 113.350  19
   2  -2   8 2740.71 106.039   6
  -2  -8  -2 4037.68 107.353   3
   2   2   8 4212.53 92.6514  24
  -2   8   2 4156.06 110.502   5
   2   2  -8 3410.45 93.0125  25
  -2   8  -2 3996.84 111.072  12
   2   8   2 4256.65 108.156  25
  -2   8  -2 4057.67 102.361  40
   2   2  -8 4221.06 106.245   1
  -2   2   8 4111.51 77.6314   8
  -8  -2  -2 3911.11 106.370  20
  -2  -8   2 3825.26 102.547   3
   2   2  -8 4271.48 85.4874  10
   2  -8  -2 3831.80 80.3571  33
  -2  -2   8 3701.98 86.6571  37
   2   8   2 4090.90 107.110  17
   2  -8  -2 3840.69 92.1282   3
  -8  -2   2 4423.61 98.5428  42
   8  -2   2 4171.44 96.3652  38
  -8   2  -2 3809.64 88.3241   2
   2  -8   2 4270.44 89.3716  38
   2  -2   8 3727.61 97.0760  37
  -2  -8   2 4205.29 88.9285  36
  -2  -8  -2 4550.15 119.506  18
  -2   8   2 3801.38 105.951  17
   8   2   2 3458.22 91.1264  33
   2   2   8 3993.82 88.1180  30
  -2   2   8 3306.49 139.270  18
  -8  -2  -2 4031.54 99.9892   7
   2  -2   8 3132.77 105.552  16
   2  -2   8 3135.65 104.664  14
   2  -8   2 3604.01 84.1419   3
  -8   2   2 4532.66 100.746  26
   2  -2   8 3333.40 97.8519  13
  -8  -2  -2 3654.16 90.8135  44
  -8   2   2 4557.10 101.407  21
  -2   8   2 3836.07 93.6905  30
  -2   2  -8 4758.98 106.652   2
   8   2   2 3657.80 137.130  19
   2   8  -2 4214.25 104.572   9
   8   2   2 4022.61 93.8620  31
  -8   2   2 3402.58 99.6356   7
  -2  -8  -2 3904.34 83.4077  38
   2  -2  -8 3511.57 93.2242   4
  -8   2  -2 3955.19 99.5632  44
   2  -2   8 3853.03 100.942  15
   8  -2   2 3597.24 93.4170  33
  -8  -2  -2 3329.18 100.187  37
   2   2   8 4122.68 96.6899   8
   2  -8  -2 4445.09 119.483  14
  -2   8   2 3259.44 80.5151  23
   2  -8   2 4270.98 117.252  14
   8  -2   2 3808.82 142.706  19
  -8   2   2 3974.40 94.9667  42
  -8  -2  -2 3727.68 92.3019  42
  -2   8   2 3777.86 111.305  43
   2  -8  -2 3747.01 106.326   4
  -2  -2   8 3771.51 85.8187  20
  -2  -2   8 3768.77 80.4315  21
  -8  -2   2 4430.12 101.725  20
  -2  -2   8 3408.46 102.185  16
  -8   2   2 3453.34 89.6724  44
   2   8   2 3932.87 131.684  43
  -2  -8  -2 4560.35 119.670  11
   8  -2  -2 3446.75 95.1670  34
  -8   2  -2 4997.91 113.967  17
  -2  -8   2 4207.11 78.4423   7
   2   8  -2 3742.65 111.635   2
  -2  -2   8 3280.05 99.6315  14
   8  -2   2 3820.99 91.9900  22
  -2  -2   8 3819.22 102.451  13
   2  -8  -2 4449.24 120.274  16
   8   2   2 4613.65 97.9263  22
  -2   8   2 4034.27 100.487  29
  -2   8  -2 4126.47 101.425  28
   8  -2  -2 3664.93 96.8301  41
   2  -2   8 3809.25 81.4652  32
  -8   2  -2 3941.05 100.600  21
  -2  -2   8 2568.62 104.941  18
  -2   2   8 3516.23 82.9762  32
   2   8  -2 4110.12 116.270  12
   8   2  -2 4163.02 99.9942  41
   2   2  -8 3832.53 91.2057   9
  -2  -8   2 3982.56 106.488  18
  -2  -2   8 3703.49 79.3000  26
  -2   2   8 3353.62 76.3517  26
  -8   2  -2 4008.22 102.977  26
   8   2   2 3003.24 120.765  12
  -8  -2   2 4758.64 111.406   7
  -2   2   8 3699.90 80.1795  24
  -2   8   2 4001.60 98.5483  28
  -2   2   8 3372.16 140.361  11
   8   2  -2 4148.62 99.3947  33
   8  -2   2 3546.70 89.5101  31
   2  -8   2 3427.01 98.9791   4
   2  -2   8 4656.27 98.8045  24
  -2   2  -8 4331.71 105.702   1
  -8   4   0 25375.6 307.386  17
   8   4   0 21464.0 265.331  34
   8   0  -4 18101.6 274.408   1
   8   0   4 22688.4 233.910  30
   0   8  -4 22695.7 295.655  12
   0   4   8 18956.8 272.785   6
  -4   0   8 22714.7 232.243  20
  -4   8   0 24115.4 289.527  17
   4   0  -8 28268.3 289.904  19
   0  -4   8 22993.6 254.160  37
  -8  -4   0 26304.4 252.732  42
   4   8   0 18418.0 275.384   2
  -4   0   8 16705.6 315.378  18
   8   0   4 23668.9 261.869  38
   8   4   0 20439.3 242.075  25
   8   0   4 19198.7 226.758  33
   0   4   8 19868.0 216.217  39
   0   8  -4 25613.8 272.668  29
   0  -4   8 21632.1 268.813  13
   8  -4   0 25122.4 275.158  27
   0   8  -4 23475.1 267.129  28
   0   8  -4 20963.0 246.145  44
   0  -8   4 20851.7 222.184  42
   0   4  -8 21692.1 241.422  40
   4   0   8 23452.8 248.703  30
   0  -8  -4 24758.4 270.071   4
   0  -4   8 23327.5 257.508   8
   0  -8   4 23222.8 256.870   3
   0   8   4 25649.6 268.298  28
   8  -4   0 19188.9 308.292  15
  -8  -4   0 24629.0 276.650  37
  -8   0   4 24127.9 245.510  42
   8  -4   0 18517.1 221.591   4
   0  -4   8 17894.4 273.278   6
   4   0  -8 25402.2 276.588   1
  -4  -8   0 24256.6 244.638   7
   0  -4   8 17994.9 249.710   3
   0   4   8 22993.9 235.947   8
  -4   0   8 22677.4 230.837  21
  -4   0   8 23461.7 233.220  35
   8   0   4 30944.0 349.847  15
  -8   4   0 22844.8 269.855  44
   0  -8  -4 29634.6 309.708  16
   4  -8   0 23653.9 242.959  27
   0  -4  -8 23779.2 259.698   4
  -4   8   0 22648.6 263.789  40
   8   0   4 19059.2 238.772  31
   8   0  -4 23313.3 253.869  25
  -4   0  -8 28670.0 286.283   2
   8   0  -4 21002.2 304.552  19
  -4   0   8 16644.9 316.022  11
   8   4   0 17268.7 286.124   1
   4   0   8 27096.0 285.964  24
  -4  -8   0 23740.9 233.492  27
   0  -8   4 15703.0 205.973  35
   8   0  -4 23714.4 277.263  34
   4  -8   0 24203.6 233.697  38
   8   0  -4 23174.2 275.362   9
  -8   4   0 22858.8 252.874  21
   8   0   4 24485.1 263.755  22
  -4  -8   0 30531.6 314.884  11
   0   8   4 21848.1 270.110  25
   4   0   8 19281.5 264.414  16
  -4   0   8 21335.2 270.237  13
  -4  -8   0 30435.2 314.455  18
  -8   0   4 20677.0 222.606  44
   4   0   8 19239.5 262.349  14
  -8  -4   0 19999.7 235.767  36
   0   8  -4 22900.9 254.293   9
   4   8   0 22344.1 314.953  12
   0  -8   4 23964.8 234.104  38
   4   0  -8 25788.1 271.129  34
  -4   0  -8 25052.1 272.207   1
   4   0   8 21039.4 254.647   8
   4   8   0 23801.0 273.984  29
   4   8   0 24291.7 281.391  25
   0  -8   4 24925.7 293.512  16
  -8   0  -4 20384.0 244.978  21
   0  -8   4 26786.3 256.764  36
   0   4  -8 23576.0 264.016  29
   8  -4   0 22974.3 240.899   9
   4   0  -8 22996.3 275.484  25
   8  -4   0 20913.2 236.524  41
  -4   8   0 21777.5 262.240  44
   0   8   4 24638.0 270.982  40
   0   4  -8 22163.8 271.604   1
   4   0  -8 23181.5 271.878   9
  -8   0   4 20001.4 256.544   7
  -4   0   8 22220.2 228.027  26
   0  -4   8 21592.2 233.310  20
   0   8  -4 25177.9 275.709  40
   8   4   0 24933.3 274.754  23
   0  -8   4 19918.6 249.878   4
  -4  -8   0 24820.6 250.355  36
   4   8   0 22265.1 330.515  43
   0  -4   8 21163.3 283.024  16
  -4   8   0 21059.8 241.738   2
   4   8   0 24391.5 268.555  34
   8  -4   0 21750.1 253.072  33
   8   4   0 25060.6 263.291  33
  -8  -4   0 21120.7 236.620  44
   0   8   4 20839.2 272.010  17
   0   8  -4 21743.4 227.815   1
   8   4   0 17891.4 310.278  19
   8   4   0 18281.2 298.998  12
  -8   0  -4 24085.8 263.137  44
  -4   8   0 21370.1 246.352  28
   0   4   8 25341.9 289.479  13
   4   0  -8 20509.0 243.135   4
  -8   0  -4 25798.1 276.458  17
  -4   0   8 23740.0 239.830   7
  -4   8   0 23079.1 258.250  39
   0  -4   8 21191.1 237.885  36
   0  -8   4 24563.7 289.501  14
   4   8   0 25894.2 280.914   9
  -4   0  -8 20931.3 255.349  10
  -8   4   0 22838.2 252.111  26
   8   0  -4 23411.4 273.009  41
  -8   0  -4 21136.6 249.777  26
  -8   4   0 22882.6 254.626  20
   0   8   4 23795.0 281.337  29
   8   4   0 23361.9 237.673   9
  -8   0   4 25693.7 244.847  21
   8   0   4 23280.0 273.323   6
   0   8   4 21112.1 273.055   5
   0   4  -8 24193.8 266.957  28
   8   0  -4 22430.1 254.784  33
  -8   4   0 22446.1 242.346  39
   0   8   4 26297.3 270.470   2
   0   8   4 24859.2 327.825  43
   4   8   0 22925.2 237.199  22
   4   0   8 21074.5 232.851  32
   8   0   4 24348.5 245.804  32
  -8   0  -4 18873.5 259.365  20
  -4  -8   0 23307.3 233.176  38
  -8   0  -4 24128.4 256.025   7
   4   8   0 24331.9 243.102  30
   4  -8   0 23025.7 295.897  16
   8   0   4 22671.3 359.675  19
  -4   0   8 23845.6 230.058  39
   4   0   8 22624.6 286.309  15
   0   8   4 17955.6 205.382  22
  -8   0   4 25513.5 242.901  26
   0  -8  -4 20110.7 213.187  31
   0   8   4 23271.6 256.904  30
   0   4   8 22933.8 242.948  24
   0  -8  -4 29097.6 307.248  14
   0  -4   8 21027.9 281.054  14
   4   0   8 17985.9 288.051   6
  -8   4   0 23868.6 226.790   2
   4   8   0 22503.3 240.096  23
   4  -8   0 19162.9 258.796   4
   0   8   4 20381.1 235.937  23
   4  -8   0 22909.3 293.398  14
   0  -4   8 22410.0 239.785  42
  -4  -8   0 26434.2 286.342   3
  -8   4   0 21856.2 261.839   7
   8  -4   0 22698.7 247.433  31
   0   8  -4 19454.0 265.990   2
   8  -2   4 187.742 46.3674  15
  -2   4   8 116.954 21.9511  32
   4   8   2 412.328 42.8418  17
   4   8  -2 175.527 45.8957  43
  -8   2  -4 198.836 31.7387  17
   2  -8  -4 178.873 31.9681   3
  -4  -2   8 319.842 27.3578  42
  -8  -4  -2 146.814 28.0849   7
   4  -2   8 124.746 28.2806  36
  -2   4   8 208.613 24.7019  35
  -4  -2   8 154.665 23.4090  37
   8   4  -2 124.738 53.2614  19
   4   8   2 149.275 27.1870  30
  -4  -2   8 475.328 34.4284  20
   8  -4   2 149.168 25.3149  38
  -2   8   4 133.810 37.9208  43
   4   8   2 135.260 41.4592  43
   8   2  -4 170.891 39.5938  25
   8   2   4 131.752 24.9845  30
   8  -4   2 152.778 28.3310  27
  -4   8   2 176.492 34.9092  43
   4   8   2 174.056 24.7848  22
  -8   2   4 104.738 30.3657  17
  -8   4   2 99.4814 33.5063  17
   4  -2   8 195.415 26.5956   8
  -2  -8   4 199.898 45.3825  18
   8  -2   4 156.532 62.1367  19
  -2   8   4 165.840 26.6243  39
   8   2   4 121.348 26.0902  33
  -2  -4   8 128.619 31.6020   3
  -8   4   2 104.959 31.0488   7
   2   8   4 134.244 35.7800  29
  -4   8   2 260.462 30.5425  32
  -4   8   2 180.697 32.1260  28
   2   8   4 144.263 43.9250  12
  -4   2   8 133.936 21.7749  39
   8  -4   2 135.069 28.4079   4
  -4  -8  -2 135.748 26.0548  36
   4   8  -2 134.922 33.5414   2
   2   4  -8 162.006 36.8068  29
   4   2  -8 145.301 36.4995  29
   2   4   8 169.903 24.3171   8
  -8  -4   2 169.797 27.5317  42
   8  -2  -4 108.107 41.0212   1
   2   8   4 132.430 27.0406  28
   8  -4   2 162.094 54.7399  15
  -2  -8  -4 139.574 24.6364  38
   2   8  -4 162.770 31.9124   9
   4   8   2 102.552 37.2299  34
   2  -4   8 134.980 26.9738  36
   8  -4   2 182.620 39.1438  24
   4   8  -2 253.496 41.3036  25
  -2   8  -4 149.576 40.0952  28
  -8   4  -2 276.578 27.1929   2
  -4   8  -2 125.281 31.7557  12
  -4   8  -2 135.768 33.3574  28
  -4   2   8 779.766 46.2221   7
  -8   4  -2 149.608 40.6851  26
  -2   8   4 176.760 35.4939  17
   4  -2   8 191.603 28.3305  30
  -4  -8  -2 155.839 22.3050  27
  -4  -2   8 166.109 21.7367  35
   8   4   2 156.560 23.6314  22
   8   2  -4 184.135 43.8676  34
   4  -8   2 146.132 24.9049  27
   4   2  -8 194.163 36.3838  19
   2  -4   8 177.092 25.4502  24
   2   8  -4 170.044 27.8595   1
   2   4  -8 171.813 27.8526   9
   8   2   4 195.193 40.1883  15
  -8   4   2 113.760 24.4370  44
  -4   2   8 138.189 61.8100  18
   4  -2  -8 158.709 26.9851   4
   2  -8   4 182.888 44.0689  16
   8   2  -4 150.905 54.8509  19
  -2   4   8 168.748 35.0565  13
   4   8   2 290.908 49.6796  12
   4  -2  -8 127.599 33.0007  25
  -4  -8  -2 162.355 38.3701   3
   4  -2   8 107.585 37.1835   6
   8  -2   4 131.330 29.9198   6
   2   4   8 146.293 33.5131   6
  -8   2   4 159.187 26.4756  26
  -4  -2   8 217.650 51.3943  11
  -8  -2   4 161.521 30.3738  20
   8  -4  -2 121.044 34.3328  33
   2   4  -8 165.146 30.6620  40
   4  -8  -2 134.679 23.2251  31
   2   4   8 160.109 22.9474  32
   4  -8   2 129.928 48.7517  16
  -4  -2  -8 116.313 24.5231  10
   4  -2   8 92.3303 28.0461  13
   2  -4   8 126.883 29.7407  13
   2   4  -8 186.835 32.4202   1
   4  -8  -2 176.984 52.5737  16
   8   4   2 110.953 28.2452  41
   8   4  -2 193.860 39.4729  25
  -4   8  -2 115.711 27.3037   2
  -8   2  -4 221.499 27.0565   2
   2  -4   8 131.275 21.6746  35
  -2   8   4 147.968 24.7201  44
  -2   4   8 147.414 19.0163   8
  -8   2   4 150.909 26.3735  21
  -2  -4   8 160.579 45.6596  11
  -2   8   4 214.324 31.9914  28
  -2  -8  -4 126.000 32.8329   3
  -8  -4   2 141.692 20.8850  44
   2   8   4 126.640 35.6325  25
  -2  -8   4 226.530 46.2668  11
  -8   4   2 160.598 31.8914  26
  -4   2   8 150.354 22.9108  35
  -4   2   8 127.781 59.3616  11
   2   8   4 132.464 30.1271  17
   4   8   2 168.008 35.7700  29
   2  -8   4 149.829 36.7425  13
   8   4   2 114.043 54.8967  12
  -4  -8   2 364.408 51.6394  18
   4   2   8 170.504 25.3020  24
  -4   2  -8 168.580 27.9552   2
   4  -8  -2 180.440 26.7666  33
   8   2   4 274.924 37.0840  34
   4  -2   8 109.946 21.9702  38
  -2  -4   8 152.901 33.0882  16
   4  -8  -2 137.165 39.1029   4
  -8  -4   2 185.284 29.7568  20
   8   2   4 180.422 26.5792  22
   8  -4  -2 145.790 28.0275   9
   8  -2   4 111.376 26.8290  33
  -8  -4  -2 137.696 22.8549  44
   4   2  -8 179.257 30.8502   1
  -8  -2  -4 105.647 42.0488  20
  -4  -2   8 161.063 21.4118  21
   2  -8   4 150.238 24.0757  36
  -4  -2   8 239.573 52.0052  18
   8   2  -4 158.207 30.2447   9
   4  -2   8 153.175 24.6454  32
  -2   8  -4 154.744 41.0007  39
   4   8  -2 261.683 42.3163  29
  -2  -8   4 234.713 25.4282  37
  -8   4   2 177.909 33.6337  21
   8  -2  -4 91.7870 34.7496  34
  -8   2  -4 116.042 37.7066  26
  -8   4   2 177.440 26.4540  39
   2  -8  -4 127.952 34.7549   4
  -2   4  -8 275.543 36.4001  28
   2  -4  -8 159.532 28.3590   9
   8   2   4 283.010 35.9025   6
   2   4   8 147.370 25.2873  30
  -4   2   8 121.875 31.3622  13
   8  -4  -2 163.058 34.3646   4
   8   2   4 120.129 24.5925  23
  -2   8   4 147.845 22.0780  32
   2   4  -8 191.334 35.7946  19
   2   8  -4 194.172 38.9719  40
   8   4   2 151.322 43.7829   1
  -4  -2   8 158.803 29.0320  13
  -4   8   2 130.037 28.1980  30
   4   8   2 135.186 26.7714  23
  -8   2   4 223.419 31.9888  20
  -8   2  -4 160.670 26.8847  44
  -8  -4   2 370.165 41.8503  37
  -4   8   2 196.741 30.9790  39
  -4   8   2 157.103 35.8054  17
  -2   4  -8 178.720 33.2565  12
   8   2   4 104.666 56.7481  19
  -8  -4   2 186.770 29.2901  36
  -4  -8   2 190.333 25.9836  38
   2  -4   8 295.871 43.4908   6
  -2  -8   4 176.214 23.3580  38
  -2  -4   8 150.565 22.7302   8
  -8   4  -2 162.604 32.4497  17
   4  -8  -2 164.734 51.2127  14
   4  -8  -2 142.894 27.7788   3
   2  -8  -4 142.599 23.0987  31
  -8   2   4 155.084 27.0983  42
  -2  -4   8 176.235 24.3995  42
  -2  -4   8 171.147 22.9789  35
   4   8  -2 157.817 43.9715  12
  -2   8  -4 136.563 32.0478  40
   8  -4   2 130.398 27.9889  31
  -8   4   2 130.875 27.1975  35
   4  -8   2 137.303 23.2317  38
   2   8  -4 166.047 37.8256  28
   8   4  -2 281.498 35.4500   9
   2  -4   8 131.151 24.7494   8
   4   2   8 148.852 22.9367   8
  -2  -4   8 226.264 25.9955  20
  -4   2   8 126.053 21.1379  20
  -2   4  -8 139.882 26.2350   2
  -2   4   8 235.868 30.9402  23
  -2   8   4 288.845 38.8012  40
  -8   4  -2 144.989 39.8986  21
   2  -8   4 155.655 43.5874  14
  -4  -8   2 161.329 24.5343   7
  -2  -8   4 236.420 25.1055  27
   4  -2   8 116.027 34.2875  16
  -2  -8   4 184.026 35.5052   3
   8  -2   4 141.857 25.8542  38
   4   2   8 132.863 33.5019   6
   8  -4   2 118.810 58.7263  19
   4  -2   8 97.8369 21.3565  22
   8   4  -2 130.774 49.1374   1
  -8   2  -4 139.019 37.3448  21
   2  -8   4 143.243 31.8132   4
   2   8  -4 230.614 42.8154  12
  -8  -2  -4 159.776 26.1656  44
  -8  -4   2 202.061 30.8275   7
   8   2   4 124.719 24.8644  32
  -2   4   8 116.082 20.0231  21
  -8  -2   4 432.045 37.5080  37
   8  -2   4 219.679 29.1948  22
   4  -2  -8 150.489 28.0870   9
  -2   8   4 147.985 27.6044  23
  -2   8   4 145.068 27.8482  30
   8   2  -4 134.871 39.0697   1
   2   8  -4 180.750 34.8866   2
   8   4   2 139.774 54.7261  19
  -2  -8   4 193.766 26.0123  36
   2  -4  -8 140.996 28.0826   4
  -4  -2   8 170.524 36.0379   3
   8   2  -4 144.209 30.9198  41
  -4   2  -8 149.402 25.3801   1
   4   2  -8 297.330 34.5403   9
   4  -2  -8 179.429 33.2593  34
  -4   8   2 135.133 31.5510   5
  -8   4  -2 111.306 39.0766  20
  -8  -4  -2 128.074 36.7445  37
  -8  -2  -4 133.298 28.0730   7
  -8   4   2 228.147 31.2293  42
   2   8   4 175.091 24.0681  22
   4   8   2 208.234 40.4629  25
   2   8  -4 226.603 42.1162  29
  -4  -8  -2 193.902 49.8280  18
  -8   4  -2 159.065 26.3941  44
   2   4   8 151.438 24.4451  24
  -2  -4   8 185.217 29.3987  13
   8   4   2 129.102 35.3722  34
   4  -2   8 87.0773 32.7781  14
   4  -8   2 138.970 48.0890  14
   8   4  -2 158.937 32.1976  41
  -4  -8   2 296.919 43.7147   3
   8   4  -2 154.302 40.2927  34
   8  -4  -2 101.549 32.7634  34
  -2   4   8 124.714 62.5286  18
  -2  -4   8 155.413 33.7224  14
  -4   2   8 124.932 22.1593  32
   8   4   2 134.501 26.9737  33
   4   2   8 155.502 21.5325  22
  -8  -2   4 151.946 21.7161  44
  -4  -8  -2 120.572 23.8772  38
  -4  -8   2 191.626 27.3356  36
   8  -4   2 141.470 27.2247  22
   4   8  -2 522.662 46.1666  40
   8  -2  -4 151.513 34.4828  33
   8  -2  -4 150.121 34.2339  41
   8   2   4 130.515 23.2969  31
  -8  -2   4 226.998 32.2900   7
   8  -4   2 146.890 33.2736  33
  -2  -8   4 158.091 21.1460  42
  -4   8   2 162.961 35.6313  40
  -4   8   2 120.215 25.7165  44
  -4  -8  -2 164.361 47.9262  11
  -2   4   8 113.381 19.5688  26
   4  -2   8 198.396 34.5358  15
   8  -2  -4 142.451 30.4576   9
  -2  -4   8 139.068 23.1328  36
   4   2  -8 132.118 36.2592  25
  -4   8   2 165.938 25.7537  23
  -8   2   4 119.798 22.8662  44
  -2  -4  -8 203.698 27.7303   4
   2  -8  -4 174.901 50.5266  14
  -4   8  -2 254.007 40.8600  39
   2   8   4 126.453 27.1372  30
  -4  -8   2 187.002 24.4857  27
   8  -4  -2 114.195 29.9625  41
   4  -8   2 112.269 33.1827   4
   2  -4   8 145.430 29.1477  37
   8  -2   4 127.800 31.5019  24
  -4  -8  -2 167.555 26.5794   7
   4   2   8 156.695 25.7857  30
   8   4  -2 145.326 30.3140  23
   2  -8   4 142.562 23.7131  38
   2  -8  -4 141.370 47.7436  16
  -8   4  -2 121.800 31.3681  39
   8  -4  -2 135.183 26.3853  31
  -4  -2   8 174.216 21.7850  26
  -4   8  -2 184.268 32.9636  40
  -2   8  -4 171.110 28.4196  44
  -2  -4  -8 178.833 29.5163   3
  -8   4   2 140.855 31.8449  20
   2   8   4 128.179 25.6214  23
  -4  -8   2 344.963 51.3931  11
  -4   8  -2 121.128 26.5222  44
  -2   4   8 127.100 65.3981  11
   4  -8   2 158.355 25.0575  31
  -2   8   4 187.264 36.5382  29
   2   8   4 116.539 26.8267   5
  -2  -4   8 143.266 45.7672  18
  -4  -8   4 64117.9 458.027  27
  -8  -4   4 64350.4 529.836  18
  -8  -4   4 61692.8 440.287  36
   8   4   4 56896.8 437.855  30
   4   8   4 50333.7 450.097  30
  -4   4   8 45899.1 602.381  18
   8   4   4 40684.6 554.358  12
   8  -4   4 54469.9 490.192  27
   8  -4   4 55371.3 484.415  22
  -8  -4   4 63963.8 529.473  11
  -8   4  -4 49909.8 440.937  39
  -8  -4   4 67285.0 496.280   7
   4   4  -8 60401.8 524.281   1
   4   8  -4 58450.1 513.255  29
  -4  -4   8 59782.4 430.399   8
  -8   4  -4 69707.6 522.448  17
   4   4  -8 66598.0 510.469   9
  -4  -8  -4 49471.6 421.358  38
  -4  -4   8 57479.8 450.331  20
   8   4  -4 65896.8 536.572  34
  -4  -8  -4 67074.7 543.216  11
  -4   8   4 60970.0 488.796  28
  -4  -8   4 63223.5 459.815  37
  -4  -4   8 59833.2 465.032  37
   8   4  -4 64285.3 494.426  23
   4   4   8 57962.1 470.868  30
  -4   4   8 52049.4 515.164  13
   4   8   4 53366.9 498.232  29
   4  -4  -8 62352.4 523.065   9
   4  -8   4 61144.9 539.464  13
   4   8   4 53794.0 518.875  17
  -4   4   8 49406.8 422.872  21
   8  -4   4 51510.6 494.249   6
   4  -8   4 57236.6 471.837  27
  -4  -8   4 58235.4 429.332  42
   4  -8  -4 49825.7 461.511  41
  -4   8  -4 57955.9 480.042  28
   8  -4  -4 59219.0 488.298  33
  -8  -4  -4 55146.3 459.544  44
  -4   4  -8 51938.4 442.792  28
   8  -4   4 58046.5 472.096  31
   4  -4   8 55377.0 542.688  16
   4  -8  -4 60405.4 539.438  14
  -4  -4   8 58471.2 448.109  42
  -4   8   4 60506.5 510.055   5
   4   8   4 54320.1 464.914  23
   8   4   4 45437.4 414.425  41
   4   8  -4 64342.4 523.204  25
  -8  -4   4 64083.2 539.442   3
   8   4  -4 56993.4 504.212  25
   8  -4   4 58154.8 499.729  36
  -4   8   4 59255.2 499.357  40
   4  -4   8 54544.6 493.263  37
   4  -4   8 45753.3 531.243   6
  -4   4   8 46442.8 607.022  11
   8   4  -4 71410.0 537.919   9
   8  -4   4 63687.5 588.358  15
   8  -4  -4 59385.0 494.842  16
   8  -4   4 68944.4 549.404  24
  -4   8   4 55805.1 461.513  44
   8  -4  -4 59865.5 494.444  14
   8  -4  -4 51368.5 451.061   4
  -4   8   4 63945.5 478.132  39
   4   8  -4 66514.4 518.750  40
   4   4   8 61970.1 476.896  24
  -8   4  -4 59282.3 500.418  44
   4  -4   8 54621.8 430.183  32
   8   4  -4 52127.5 556.972  19
  -4   4   8 68706.1 488.643  23
   4  -8  -4 45362.7 480.905   9
   8  -4  -4 54634.1 472.653  34
  -4   8  -4 51307.7 493.725  12
   4  -4   8 50938.9 440.671  22
  -8   4   4 58892.1 463.317  35
   8  -4  -4 58300.1 496.651  41
  -8  -4  -4 52614.5 460.633   7
   4   4   8 52836.0 436.093  32
  -4   4   8 48795.2 420.332  26
   8  -4   4 55972.4 479.817  38
  -8   4  -4 52296.3 477.487  21
  -4   8  -4 48549.5 480.188   2
   4   8   4 50273.2 575.088  12
  -4   8  -4 61681.9 475.367  21
  -4   4   8 51436.7 442.362  39
  -4   4  -8 63042.8 515.441   2
   4  -8   4 61196.3 480.509  24
   8   4   4 63585.7 481.235  22
   4   4   8 56511.5 478.363   8
   8  -4   4 68981.3 680.624  19
  -8   4  -4 59594.3 479.823   2
   4  -4   8 64501.0 532.251  15
  -4   4  -8 73467.8 569.446  12
  -8  -4  -4 46672.3 470.122  37
   4   8  -4 63862.2 519.921   9
   8   4   4 51273.0 455.072  23
  -4   8  -4 62990.3 482.322  26
  -4   4   8 52328.6 445.721  35
   4   4  -8 62316.5 509.283  25
   4   8  -4 53501.1 519.297   2
   4  -4   8 51115.4 443.536  38
   4  -4   8 52185.5 472.012   8
  -4  -8  -4 58378.2 500.625   3
  -4  -4  -8 47607.4 452.235  10
   8   4  -4 45673.0 508.744   1
   4  -4   8 50056.4 415.736  35
  -8   4   4 63512.0 462.623  39
  -4  -4   8 60893.6 442.111  35
  -8   4  -4 53792.7 484.195  26
   4  -8  -4 60401.6 539.996  16
  -8   4   4 68227.1 502.755  26
   4   8   4 43550.1 544.079  43
   8   4   4 51508.5 476.140  34
   4  -8   4 50713.8 452.439   8
  -8   4   4 64039.0 457.015  20
  -4   8  -4 54860.4 468.537  40
  -4  -4   8 58281.6 487.188  13
   4  -8   4 56886.9 463.653  38
  -4  -8   4 63513.2 427.819  38
   4  -4  -8 64693.5 510.687  34
   4  -4   8 54997.3 537.957  14
   8  -4   4 64030.2 531.148  13
   4  -4   8 54461.5 511.978  13
  -4   8  -4 57023.4 491.161  44
   8  -4  -4 56513.3 505.998   9
   4   4   8 52041.9 422.167  22
  -8  -4   4 55459.9 423.302  44
   4  -4   8 72735.1 520.955  24
   4   4  -8 64045.1 549.241  19
  -4  -8  -4 67118.0 544.802  18
   8   4  -4 66587.2 497.758  41
   4  -8  -4 52433.5 484.296   4
   4   4  -8 59205.1 506.737  40
   4  -8  -4 55932.2 457.881   3
  -8  -4   4 63670.2 479.784  20
  -4   4   8 47270.3 438.168  32
  -4   8   4 61836.1 470.139  32
  -8   4   4 68090.8 503.541  21
  -4   8  -4 61813.3 504.643  39
   4  -8   4 55845.3 455.519  36
  -4   8   4 55961.5 448.544  23
   4  -4   8 52500.3 438.589  27
  -8  -4   4 59281.7 457.737  42
   4   8  -4 63942.9 588.387  12
   4  -8   4 61250.7 439.535  31
   8   4   4 54060.1 583.174  19
   4   8  -4 53730.3 488.323   1
   4  -8  -4 57452.2 431.175  31
   8   0   6 4.06020 24.8342  24
  -8   6   0 59.3696 33.9943  17
   8   0   6 324.945 36.5678  30
   6   0   8 2.55373 19.4115  22
   8   0  -6-11.4589 25.7868   9
   6   0  -8 4.75441 41.5206  19
   6   0   8 12.7125 15.7897  31
  -8   0  -6 19.6424 27.8994  17
   0  -8   6 11.0217 35.8716  18
   0   6  -8 15.6842 34.3558  12
  -8   0   6-0.71823 23.6399   7
  -6   0   8 20.1174 19.3111  42
   0  -8   6 0.88551 34.0312  16
  -6   0   8-9.05221 27.3555  13
  -8   0   6 18.4989 20.9482  42
   8  -6   0 289.536 37.6725  41
   8   6   0 20.3440 53.0072  12
   0  -8   6 11.3250 34.1679  14
   0   8  -6 30.0505 35.6730  29
  -6   8   0 32.4907 28.2728  28
   0  -8   6 15.9151 21.6912  35
  -8   6   0 222.230 39.6074  39
   6   0   8 27.2641 34.4047   6
   6   8   0 0.76128 34.7196  29
   0   8  -6 46.3056 39.0629  12
   0  -6   8 3.42229 19.4234   8
   6  -8   0 4.33299 24.7876  33
   8   0  -6 66.4279 33.7705  41
   0   6  -8 15.8093 29.0902  40
  -6   8   0-7.20624 28.1977  40
   8  -6   0 38.4459 24.3851  27
   0   8   6-10.7599 28.3076  17
   0   6  -8 15.2566 34.3483  29
  -8   0  -6 0.72558 20.6364   2
   0  -8  -6 17.5345 47.0689  16
   6   0  -8 16.7843 21.9099   4
   6   0   8-3.63166 19.6171   8
   8  -6   0 5.70584 22.7314  31
  -8   6   0 3.07967 22.5238  44
  -6  -8   0 1.09308 20.0047  27
   6   0   8 0.82017 22.0415  24
   0   6   8 21.6554 27.2193  17
  -6   0   8 129.369 56.7831  18
   8  -6   0 6.34610 33.6589   4
   0  -6  -8 47.1404 29.3765   4
   8   0   6 7.62457 31.4738   6
  -6   0   8 62.6230 20.5404  26
   6   0   8 32.4231 31.9875  15
   6   0   8 7.07612 23.4185  30
  -6   0  -8-8.19095 20.7966   2
   0  -8   6 1.47381 35.5916  11
  -8   0   6 31.5668 21.1453  26
   8  -6   0 15.9799 24.0185   9
  -6   8   0-1.20340 32.8219  26
   0  -6  -8 34.9249 28.2153   3
   6  -8   0 9.32743 19.5896  38
   0   6  -8 17.2383 28.9318   2
  -6  -8   0 72.5649 43.8674  11
   8  -6   0 41.5153 50.1486  16
   0   8  -6-3.30050 37.7776  39
  -6   8   0 0.91576 30.4909  17
   0  -6   8 10.1187 41.6973  11
  -6  -8   0 33.2676 25.0544   7
   6   8   0 5.40852 39.8424  25
   8   6   0 3.80910 27.2978   9
  -6   0   8 119.906 56.4847  11
   8   0  -6 16.4162 35.7139  25
  -8   6   0-6.01566 32.4080  26
   0   8   6 55.9846 42.0838  43
   0   8   6-3.43678 24.4910   5
   8   6   0 2.17773 43.5507   1
   6  -8   0 11.0415 22.1691  31
   6   8   0 30.0314 24.9148  23
  -6   8   0-2.42118 34.3534  21
   0   8   6 8.11240 30.1554  40
   0   6  -8 4.94798 25.1226   1
   0   6  -8 77.3690 36.6198  28
   0   6   8 28.1013 22.8655  24
   0  -8   6 38.0566 27.9441  13
   8   0  -6 13.4138 38.4999  34
   6   0  -8 93.2444 31.2014   9
   0   6   8-5.05051 25.3358  23
   8   0  -6 44.5656 50.0043  19
   6  -8   0-4.91971 35.0843   4
   0   6   8 156.967 37.0125  13
   8   6   0 9.23185 27.3249  41
   0  -8   6-1.98857 25.9678   3
   0   8  -6 40.8314 32.9677   2
   0   8  -6 12.4516 41.6711  28
   0  -6   8-7.03780 34.3369   6
   0  -6   8 0.65896 22.1540  36
  -6   0  -8 7.45966 27.5605  10
   0  -6   8 7.74193 27.2072   3
   0   6   8 76.0458 20.5690   8
   0  -8   6 5.25960 19.8330  36
   8  -6   0 21.9825 64.1462  15
   0  -6   8 6.50780 19.1697  35
   6   8   0 20.4816 31.3179   9
   0   8   6 63.9585 18.8148  39
   0  -6   8 14.9395 24.8377  13
   8   6   0 5.08122 59.2770  19
   0   8  -6 32.6686 23.9529   1
   0   8   6 26.8610 26.0851  28
   0  -8  -6 30.7895 44.9774  14
   0   8   6 28.9226 17.5078  22
  -8   0   6 25.4178 21.2875  21
   6   8   0 15.2146 19.9853  22
   6  -8   0 22.9303 50.2824  14
   8   6   0 55.2985 26.0623  23
   0  -6   8 27.3327 30.3950  14
   0  -8   6 1.13354 19.2967  27
   0  -6   8 0.63527 22.0954  42
   0   8  -6 21.1295 27.8506  19
   0  -6   8 161.698 27.2208  20
  -6   0   8 77.3985 21.4019  21
  -6  -8   0 50.6904 34.9106   3
   8   6   0 31.4578 23.2141  33
  -6   8   0 0.71214 33.7506  39
   6  -8   0 6.75363 50.3436  16
   0  -8   6 11.6023 22.8099   4
   0  -8  -6 13.3984 28.5014   3
   6   0   8 3.14788 21.9301  32
  -8  -6   0 84.6218 28.7650   7
   0  -8   6-5.57587 17.8399  38
   6   0  -8 11.7410 30.8613   1
  -6  -8   0 12.6871 24.7340  36
   0  -8   6 11.8631 22.1455  42
   6   8   0-10.6365 39.6056  43
  -6  -8   0 62.6850 43.2346  18
   0   6   8 283.549 29.8493  32
  -6   0   8 30.1008 21.2163  20
   0   6   8 0.64227 20.2766  28
   0  -6   8 9.25917 21.3287  37
   6   8   0 39.1093 42.6844  34
  -6   0   8-1.30708 22.0420   7
  -8   6   0-1.34490 32.3779  21
   6   0  -8 26.2798 37.5930  25
   8   0   6 15.9984 19.7467  31
  -8   0  -6 20.7288 20.9951  44
   0  -6   8 33.4483 32.9901  16
  -8  -6   0 15.4378 30.6060  37
  -6   0   8 6.50309 15.6859  35
   0  -8   6 1.13229 18.9424  37
   0  -6   8 16.2973 41.6142  18
   8   0   6 13.1199 22.8627  32
   8   6   0 8.56543 38.5867  34
  -8   0   6 3.20868 27.1045  20
   0   8   6 20.1992 33.8896  29
   8   0  -6 42.9367 41.5980   1
  -6  -8   0 0.52598 20.4109  38
   0   8  -6 9.09922 31.6678  40
   0  -8  -6 16.4946 32.5366   4
   0  -8  -6 4.35691 17.8147  31
   6   8   0 124.337 49.4653  12
   8  -6   0-5.86049 31.5963  33
   0  -8   6 152.114 44.1286   6
   6  -8   0 8.18133 19.7961  27
   8   6   0-3.22382 37.2327  25
   0   6  -8 19.9854 31.3298  19
   0   6   8 19.7846 16.0736  39
   8  -6   0 4.03052 48.3680  14
   0   8   6 20.2876 16.1231  32
   8   0   6 13.6807 20.1515  33
   0   8   6 27.5236 24.1796  30
   6   8   0-1.42335 20.6583  30
   6  -8   0 7.93345 26.1788  41
   6   0  -8 7.20062 35.6881  34
   8   0   6 4.26631 32.8694  15
   6   8   0 26.8416 28.7435  41
  -2   6  -8 2015.11 83.2640   1
  -2   6   8 2318.23 79.9381  23
  -2  -6   8 2347.01 93.8818  14
   6  -8  -2 1997.42 78.4006  41
  -2  -8   6 2554.19 103.063  18
   2  -6   8 2019.56 104.620   6
   8   6  -2 1722.49 94.8921  12
   8   2   6 2176.08 77.0474  30
  -2  -6   8 2663.51 116.757  11
   8   6  -2 2099.16 93.3555  34
  -6   8  -2 2406.99 91.1401  26
   8  -6   2 2066.61 95.3247  16
   8   6  -2 1670.87 105.515  19
   8   6   2 1466.63 109.108  12
   2   8   6 2002.39 77.2036  30
  -8  -6   2 1988.34 63.5782  38
  -2   8  -6 2118.19 87.7750  28
  -8  -6   2 2262.14 84.0761  37
   6  -2   8 1792.92 73.8485   8
  -6   2   8 2181.09 70.9806  20
  -2   6   8 2297.08 99.3718  13
   8   6  -2 2610.46 91.5215   9
   8  -6  -2 1908.43 81.5722   4
  -6   8  -2 2116.45 84.7563  39
   6   8  -2 1918.00 86.2521  29
  -2   8  -6 1969.80 91.9139  12
   6   2  -8 2244.63 95.6709   1
   2   6   8 1785.92 82.1768  17
   8   2  -6 2409.20 99.0300  34
   8   2  -6 1903.26 84.3943   9
   6   2  -8 2188.14 89.8397  29
  -6  -8   2 1975.52 86.6189   3
   2   8   6 1936.73 70.8881  28
  -2   8  -6 2299.48 91.3263  39
   2   6  -8 2228.69 87.6613  28
  -8   2   6 2452.04 79.6402  26
  -6   8   2 2079.72 77.6469  28
   2   8  -6 1998.70 80.9037   1
   8   2  -6 1887.75 96.1509   1
  -6   2  -8 2656.55 95.6420   1
  -6   8  -2 2290.71 93.4020  17
  -6   2   8 2074.72 71.9928  32
   6   8   2 2296.27 77.7825  22
   6   8  -2 2238.31 80.5198  41
  -6   8  -2 2223.19 87.5223  21
   6  -2   8 2420.81 101.599  15
   6   8  -2 1631.95 87.0877   2
   6  -8   2 2277.37 77.3652  38
   2   8  -6 2532.31 94.3922  28
  -6   2   8 1494.08 118.560  18
  -2   8   6 2199.74 91.1757  17
   8  -6  -2 2130.68 99.1477  14
  -6  -2   8 2606.80 75.3106  21
  -8  -2   6 2291.98 79.0483  20
   6  -2   8 2322.59 91.6629  24
   2  -8   6 2246.18 101.571  16
  -6  -8   2 2378.03 103.973  18
   6  -8   2 2165.03 79.9827  27
   2  -6   8 1901.29 69.4667  35
   6   2   8 1750.96 90.7209   6
   2  -8   6 2123.81 76.2192  27
  -2  -6   8 2199.46 93.9402   3
  -6   2   8 2051.99 69.0971  39
  -2  -8   6 2309.62 72.6922  27
   8   2   6 2110.80 120.384  19
  -2   8   6 1961.40 90.6428  43
   2   8   6 1897.10 64.5465  22
  -6  -8  -2 2015.39 68.7591  27
   2  -8  -6 2400.08 105.958  16
  -6  -8  -2 1988.89 83.4538   3
  -8  -6   2 2264.79 74.1290  27
  -8   6   2 2059.40 75.3067  39
  -2   8   6 2015.74 74.7346  23
  -8   6  -2 1914.16 78.6639  39
   6   2   8 1934.31 94.6943  15
  -8  -2   6 1862.71 100.654  11
  -6  -8   2 2351.23 103.536  11
   2   6   8 2442.03 81.9914   8
   2  -6  -8 2308.34 89.6733   3
   6  -2   8 1645.58 71.7643  38
  -6  -2   8 2211.78 70.7732  42
  -6  -2   8 1493.47 99.8261  11
  -6  -8   2 2183.81 76.6543  36
   6  -2   8 1642.95 83.9086  16
  -6  -2   8 2558.02 73.7440  26
  -6   2   8 2253.13 74.0397  26
   8  -6  -2 2072.27 98.7334  16
   6  -8   2 1969.18 99.6594  16
  -8  -2   6 1587.85 81.3086   3
   2  -8   6 2190.47 79.2423  36
   8   6   2 2114.92 84.6275  23
   6   8   2 2187.48 73.0612  30
   6  -8   2 2012.23 99.3741  14
  -8   6   2 2261.27 82.5905  26
   6   2  -8 2040.90 87.3285   9
   8  -6   2 1697.89 75.9343   4
  -6   2   8 1573.20 121.242  11
  -8   6  -2 2347.27 95.0828  26
   2  -6   8 2108.89 97.0317  16
  -6   8   2 1570.16 75.8303   5
   8  -2   6 2032.76 125.067  19
  -2   6   8 2134.92 78.8513  28
  -2  -6   8 2336.67 94.6554  16
   8   2   6 1813.56 72.3725  31
  -6  -8  -2 2139.22 77.5173   7
   2   6  -8 2079.71 88.8771   1
  -2   6  -8 2053.88 83.6346  39
  -2   8   6 2204.57 74.2613  35
  -2   8   6 2176.33 72.9673  39
   2  -6   8 2000.57 80.3975  37
   8   6   2 2237.54 91.7073  25
   6  -8  -2 2109.01 104.622  16
  -6   8   2 1951.02 82.2232   7
   6   8  -2 2133.89 95.4367  25
   6  -8   2 1673.20 81.6112   4
   8   6  -2 2122.93 92.8558  25
   6   2   8 1863.20 76.3562   8
  -2  -8   6 2045.49 69.5905  42
  -6   8   2 2148.01 79.3762  39
   8   2  -6 2204.06 93.6726  25
  -2  -6   8 2473.77 88.9172  13
   2   8  -6 2173.57 88.5766  40
   6   2  -8 2311.81 97.4503  25
  -2   8   6 2276.43 89.9426   5
  -8   2  -6 1829.93 80.4152  26
  -2  -8   6 2282.00 88.3597   3
   6  -2  -8 2254.59 94.9624  25
  -6  -2   8 2333.15 77.2061  20
   2  -8   6 2007.78 79.6639   8
   8   6  -2 2454.61 86.4460  23
   8  -6   2 2079.68 115.548  15
   6  -2   8 1694.01 69.1720  22
   8  -6   2 2086.11 80.5959  22
  -8  -6   2 2218.95 72.2666  42
   8  -6   2 2044.16 75.6121  38
  -6  -8   2 2090.75 72.2957   7
  -2  -6   8 2222.64 79.4527  37
  -8   2  -6 2211.36 80.7147  44
   8  -2   6 2620.95 112.475  15
  -8   6   2 1820.21 75.0593  44
  -6   8  -2 2128.18 85.8968  44
   2  -8   6 2392.47 97.7191  13
  -8  -2   6 1765.21 98.6786  18
  -8  -2  -6 2198.60 77.6270  44
   6  -2   8 2325.36 81.5333  30
   8  -2  -6 2718.42 106.423  34
   2  -6   8 2082.26 71.3200  27
   6  -8  -2 1850.37 82.1640   9
  -8  -6   2 2740.07 103.082  11
  -6   8   2 2430.60 80.9531  21
  -8  -2   6 2047.26 72.1818  42
   8   6   2 2463.90 80.7371  22
   8  -2  -6 2289.54 87.0711  33
   2   8  -6 2267.56 101.366  12
  -2   6  -8 2396.92 90.7170   2
  -6   8   2 2020.02 70.4006  23
   2  -8  -6 2280.42 103.966  14
  -6   8   2 1787.65 75.6698  44
  -8   6  -2 2170.10 90.8604  21
  -6   2   8 2129.81 72.9524  21
  -2  -8   6 2361.30 67.9886  38
  -6   8   2 2551.00 82.2898  26
   6  -2   8 2104.26 72.9982  32
  -6  -8   2 2412.28 78.9589  37
   6   2  -8 2575.68 112.527  19
  -2   6   8 1443.49 54.1076  21
  -6  -8  -2 1763.26 66.3031  38
  -2   6   8 1519.00 64.8336  32
   2  -6   8 1964.53 68.3676  38
  -6  -2  -8 2434.12 86.3144   2
   8  -6   2 2184.01 84.3380  27
  -8  -6   2 2517.82 83.4499   7
  -2   8  -6 1852.80 86.8748   2
  -8   6   2 2211.31 81.9448  21
   8  -6  -2 2349.97 89.2152  41
   6  -2  -8 2356.36 95.7516   9
   8  -2   6 2015.25 80.7134  38
   6  -2  -8 1803.53 74.4131   4
   8  -2  -6 2238.04 94.4412   9
   2   8  -6 2158.43 87.2220  19
   8   2  -6 1878.32 77.3159  41
  -2   8   6 1740.63 64.3914  32
   8   6   2 2177.88 80.3179  33
   8   6  -2 2382.85 85.5171  41
   2   6   8 2108.18 99.9431   6
  -6  -2   8 2309.01 73.2815  37
  -6  -8  -2 2080.55 75.9714  36
   2  -6   8 1909.34 79.3809   8
   2   8  -6 2215.63 83.4476   9
  -8  -6   2 2302.83 80.3733  36
  -6   2   8 1874.63 87.7429  13
   2  -8   6 2318.21 101.872  14
   8  -6   2 2053.89 94.5213  14
   2  -8   6 1910.17 71.3110  35
   6  -8  -2 2340.54 75.1236  31
  -6   2   8 1778.08 77.4999   7
  -2   8   6 1850.57 85.2384  29
   2  -8  -6 1944.87 70.7851  33
  -2  -6   8 2027.02 69.2448  20
   8   2   6 2073.45 91.5766   6
   2  -6  -8 2080.39 86.4819   4
   2  -6   8 2046.68 95.2332  14
  -6   2  -8 1756.60 69.3113  39
   2   6   8 1992.40 69.3263  32
  -8   2   6 2534.19 81.6882  21
  -8  -2   6 2405.04 77.0661  37
   8  -6  -2 2006.51 83.7841   9
   6   2   8 2066.22 73.0200  22
   6   8  -2 1921.86 103.753  12
  -2   8  -6 2199.49 83.3740  40
  -2   6   8 2025.56 69.2089  35
   6   8   2 2401.92 99.5398  34
   6   8   2 2051.58 94.8700  25
   2   6  -8 2394.49 95.8273  29
  -8   2   6 2048.64 88.3412  13
  -6   2   8 2197.36 73.5884  35
  -2  -8  -6 2271.39 86.0943   3
  -2  -6  -8 2377.91 85.1857   3
  -2  -8   6 2671.50 104.060  11
  -8   2   6 2385.22 78.4328  32
   2  -8  -6 1704.57 78.9236   9
   6  -2   8 1631.47 78.2855  13
  -2  -6   8 2029.50 68.6179  35
   2  -6   8 2008.87 88.9741  13
   2   6  -8 2113.22 86.2388  40
  -2  -8   6 2351.83 75.9650  37
  -6   8  -2 1950.25 77.2630  28
  -2  -8   6 1884.37 68.3942  35
   8  -2   6 1922.59 91.6459   6
  -8   6   2 1803.71 83.7367   7
   2   6  -8 2274.11 96.1782  19
  -8  -6  -2 2156.11 86.4979  37
  -6  -2   8 2254.36 69.3428  35
   6  -8  -2 2183.06 105.509  14
   8   2   6 1628.09 64.6179  33
  -6   8  -2 1628.84 68.6248   2
  -8   6  -2 2039.44 72.0716   2
  -2  -6   8 2276.81 78.0816   8
   8  -2   6 2981.07 104.989  24
  -8   2   6 2201.83 73.7009  35
   2  -8  -6 1901.33 85.1293   4
  -6   8   2 2063.86 86.0021  40
   8  -6  -2 2275.22 84.2020  33
   2   6   8 2245.37 80.3663  30
   8  -6   2 2073.99 91.3039  24
  -8  -6  -2 1911.42 76.8457  36
  -6   2  -8 2403.51 87.8172   2
   2  -8   6 2271.07 109.096   6
  -8   2   6 2169.76 67.8689  42
   6  -8  -2 1900.68 87.9446   4
  -2  -6   8 2247.58 77.1748  36
  -8   6  -2 2381.22 99.7694  17
   6  -8  -2 2505.76 80.1251  33
   2  -6   8 1852.22 76.0275  36
   2  -6  -8 2100.42 84.8389   9
   8   6   2 2157.08 116.034  19
   6   8   2 2145.82 82.4227  23
   8  -6  -2 2165.49 75.7917  31
   6  -8   2 2263.45 93.4789  24
  -2   8  -6 1926.01 74.0775   1
  -8  -2  -6 2168.01 81.2648   2
  -8   6  -2 1824.18 78.9735  20
   8   6  -2 1633.23 96.4229   1
  -2  -6   8 2048.17 71.9686  42
   8  -2   6 1769.33 71.9411  31
  -6  -2  -8 1672.71 73.9283  10
   6   8  -2 2376.06 94.4513  34
   6  -2   8 1633.72 93.9211   6
  -8  -6   2 2755.15 103.631  18
  -8   2  -6 1819.76 79.1127  21
   2  -8   6 2083.19 73.4320  38
   8  -2   6 2380.67 81.5363  32
   6   8   2 2090.64 86.1033  29
   2  -6   8 2816.71 82.4678  24
   2  -8   6 1887.36 83.2213   4
   2   8  -6 2253.71 93.8505  29
  -6  -8  -2 2234.64 96.6429  18
   6   8   2 1498.14 95.7714  43
  -2   6   8 1973.03 79.6771  17
   2   8   6 2088.86 89.4328  29
   6   2   8 2150.00 79.8912  30
   6   2  -8 2140.48 72.9585   4
  -6  -2   8 1213.24 77.5712   3
  -2   8   6 2344.54 87.9873  40
   8  -6   2 2023.49 76.9061  33
   6  -2  -8 2281.30 92.5458  34
   8   2  -6 2289.07 113.065  19
   2   8  -6 1863.65 85.6863   2
  -8  -2   6 1751.34 71.0696   7
  -2   6  -8 2910.50 107.101  12
   6   2   8 2126.27 75.1864  32
  -6  -2   8 1440.46 96.1783  18
   2  -8  -6 2289.51 85.6022   3
   8   2   6 2270.61 74.5265  32
  -6  -8   2 2162.57 68.1923  38
   2  -6  -8 2206.80 75.4284  33
   6   8  -2 2488.06 93.6800   9
   2   6   8 2034.66 74.2288  23
   8  -2  -6 2156.46 90.4678  41
  -8   6  -2 2405.95 83.3607  12
  -2   8   6 2251.55 82.1427  28
  -6   8  -2 1897.16 78.7364  12
  -2  -6   8 2499.50 112.697  18
  -8  -6   2 2270.35 85.9981   3
  -2   6   8 1705.81 66.4569  39
   8   6   2 2037.51 94.3956  34
  -8   2  -6 2364.79 84.4022   2
  -8   6  -2 2118.70 85.0611  44
  -8   2   6 2450.76 80.6660  20
   6   2   8 2729.64 88.9908  24
   6  -2   8 1629.46 82.0111  14
  -8   2   6 1633.22 84.8604   7
  -2   6  -8 2119.88 84.3693  28
   8  -2  -6 2010.12 86.5878  25
  -6   8   2 1857.26 91.6845  17
   2   6   8 2027.86 75.5388  24
   6  -8   2 2273.74 75.9432  31
  -6  -8  -2 2243.64 96.6641  11
   8   2   6 2694.89 109.279  15
  -2   6   8 1419.92 53.1802  26
   2  -8  -6 1871.72 63.7031  31
   8   6   2 1966.62 78.5416  41
   8   4   6 116.276 26.6361  22
   8  -4   6 113.655 27.9226  31
   8  -4   6 118.017 47.5746  15
   8  -6   4 97.5354 30.3650  31
  -4  -6   8 114.201 53.9740  11
   4  -8  -6 97.7735 42.1158   4
   8   6   4 122.301 27.1526  22
   6   4   8 79.2694 38.1943   6
  -4   8  -6 105.575 34.7193   2
  -4  -6   8 123.684 52.8226  18
   8   4   6 505.316 43.2745  30
  -6   4  -8 83.3685 38.2609  39
   4   8   6 92.7722 29.6221  30
  -8  -6  -4 92.8339 30.3875   7
   4   8  -6 72.4766 36.5386   2
   8  -6  -4 70.8657 56.8712  14
   8   4   6 76.9671 26.8482  23
  -8  -4  -6 96.1944 24.3627  44
   6   8   4 92.3515 28.6429  30
  -6   4  -8 136.327 38.5669  12
   4  -6  -8 69.4844 28.3603  33
  -8  -6   4 68.6754 27.4313   7
  -8   4   6 74.9534 34.4606  17
  -4  -8   6 137.647 47.8785  18
   8  -6  -4 98.0945 57.1841  16
   8   6   4 78.5113 46.9217  34
   8  -6   4 68.8409 33.6265   4
  -8  -4   6 65.9270 28.0590  42
   6   4  -8 104.381 51.9738  19
   8  -6   4 96.4646 50.2041  16
   8  -4   6 278.414 38.3108  27
   6   8  -4 83.3533 46.2656  12
  -8  -6   4 90.8021 27.9499  36
   6   8   4 130.142 71.9346  12
   8   4  -6 80.1910 40.9098  29
  -6  -8  -4 77.8875 49.2112  18
  -4   6   8 111.247 32.0188  23
   6   4  -8 107.679 45.6833  29
  -4   8   6 154.548 38.8654  40
   4   6  -8 107.993 44.5991  19
   4  -8  -6 93.5282 56.4479  16
  -6   4   8 238.218 48.5043  13
  -8   6   4 121.070 33.8738  26
   8  -6  -4 111.186 36.7437  33
   8   4   6 99.9924 28.4451   8
  -4   6   8 98.4139 44.4242  13
   6  -4   8 61.3049 39.5675  14
  -8  -4   6 43.7871 49.4673  11
   8  -4   6 228.262 45.6876   6
   6  -4   8 85.9393 35.8448  13
  -6   8  -4 100.655 37.5187  28
  -4   8  -6 101.320 40.7921  28
   4   6  -8 139.091 39.8176  28
  -4   6  -8 114.071 40.8973  39
  -8   6  -4 134.399 40.6797  17
   6   4   8 73.4087 29.7216  30
  -8   6   4 66.4610 38.9173  17
  -6   8   4 80.6301 39.5841  17
  -6   8   4 88.7532 31.7001   5
  -6  -4   8 50.9244 40.4753   3
  -4   8   6 117.002 38.7917  17
  -6   8  -4 105.302 48.2763  21
  -8   6   4 58.5548 24.2385  44
   4   6  -8 84.8593 35.5511   9
   8   4   6 73.7374 41.8663  34
   6   8   4 230.425 45.1863  29
   6  -4   8 109.052 29.6189  27
   8  -6   4 122.054 33.3534  27
  -6  -8   4 76.8366 23.1468  27
  -4   6   8 100.485 23.6620  21
  -4  -8  -6 115.707 41.5514   3
  -4   6   8 62.0317 27.9370   5
   8   4   6 144.549 40.3540   6
   4  -8   6 133.306 29.0012  38
   4  -6   8 111.411 48.0591   6
   6   8  -4 111.211 47.9153  25
   4  -8  -6 65.3343 36.6145   9
   6  -8   4 90.5879 30.0895  22
  -6  -4   8 52.8202 26.5652  37
   6   8  -4 93.4367 40.0238   2
   8  -4  -6 99.5835 38.6111  33
   8  -6   4 137.129 31.5287  22
   6  -4   8 83.6262 42.8843  16
  -8  -4   6 111.879 30.5374  37
   4  -6   8 128.839 29.7916  22
   8  -4   6 99.6186 32.9856  36
   8  -4  -6 104.832 34.3120   9
   6  -4   8 88.9381 42.3178   6
   8  -4   6 121.192 29.5336  38
   8  -6  -4 83.3208 41.8016   4
   6  -4  -8 170.098 42.5807   4
  -6   4   8 256.082 32.7560  21
  -4   6   8 107.647 23.3334  26
  -4  -8   6 89.8321 26.3477  36
  -6   8   4 77.1326 26.8587  26
  -6   4  -8 83.5150 29.5559   2
  -8   6  -4 82.4144 48.2866  26
  -6   8  -4 98.4802 48.7037  26
   4   6  -8 95.0982 37.3875   1
  -4   6  -8 99.3680 31.8221   2
   4  -8  -6 95.2998 33.6879   3
  -6  -8  -4 93.6054 51.3969  11
  -6   8  -4 69.5807 28.7187   2
   4  -6  -8 102.009 54.1814  16
   8  -4  -6 76.8656 50.2136  16
  -4   8  -6 147.327 41.0567  12
   6  -8  -4 102.174 60.0975  16
  -4   6   8 189.096 31.6048  35
  -4  -6   8 291.475 32.7235  20
  -6  -8  -4 115.622 41.1711   3
  -4  -8   6 173.992 49.3346  11
   4   8   6 111.322 67.1978  12
  -8  -6   4 113.772 46.6027  11
  -4  -6   8 79.8819 25.2160  37
   6  -8   4 77.6149 51.7852  16
  -6  -4  -8 54.8233 26.0292  10
  -6   4   8 240.428 31.5208  26
   6   8   4 147.028 47.0603  25
   4   6   8 123.605 30.7739  23
   4   8  -6 140.852 45.8750  25
   4   6  -8 84.4636 42.9906  25
   6   4  -8 67.5042 43.7927  25
  -4  -8   6 96.2376 36.4786   3
  -8  -6   4 66.8335 33.4740   3
   6  -4  -8 102.130 37.9050  25
  -6   8  -4 139.623 32.6027  44
   6   8  -4 86.7589 46.3507   1
  -6   4   8 93.5834 72.4465  11
  -6   8   4 77.7020 26.0042  44
  -4   8  -6 87.6372 42.8570  21
  -4  -6   8 87.7086 37.1310   3
   6  -8   4 104.830 26.8696  38
  -4   8   6 109.040 34.4310   5
  -4  -6  -8 89.5466 25.6257   7
   4  -8  -6 102.158 35.3000  41
   4   8  -6 73.0155 38.8859  40
  -8   4  -6 54.0132 43.3344  26
   6  -8   4 113.744 46.9896  13
  -6   8   4 84.4684 31.9729  28
  -6  -4   8 67.8476 25.4675  20
   4   6   8 83.9994 22.6558  32
   6   4   8 86.3870 24.7744  22
  -6   8   4 153.610 33.2635  32
   8  -6   4 86.1275 51.3028  15
   6  -8   4 106.125 37.5169   4
   4  -6  -8 125.286 37.4913   9
  -8  -6   4 86.6972 25.8181  42
  -8  -4   6 67.8298 27.8088  20
   8  -4   6 209.662 44.2063  24
  -4  -6   8 133.290 28.1395  36
   4   8   6 93.4124 24.8116  22
   8   4  -6 62.3678 31.0264  40
   8  -6   4 94.7154 26.9153  38
   6   4  -8 68.4141 41.2847   1
  -6   8   4 200.304 33.7764  23
   6  -4   8 85.4754 27.4791  22
  -6   8   4 99.1215 37.1660  40
  -8   6  -4 75.6208 27.4472  44
  -8  -4   6 91.0375 53.4344  18
   4  -8  -6 102.539 56.2602  14
  -4   6  -8 68.8723 37.6565  28
   4   8  -6 60.0802 43.9897  19
  -8   4  -6 34.8167 37.3808  39
   8  -6   4 87.2864 48.8150  14
  -6   4   8 68.6682 26.9851  32
   6   4  -8 36.6184 32.8910  40
   8  -4  -6 80.3136 37.9605  41
  -8   6   4 82.3455 29.5401  39
   6   4  -8 80.2299 34.2475   9
   4  -6   8 262.835 34.0791  38
  -4   8   6 615.862 48.3118  35
   6   8  -4 63.0798 44.3644  29
  -6   8  -4 86.1536 35.1651  12
  -4  -6   8 68.6224 22.3704  35
   6  -8  -4 96.7405 60.0526  14
  -4   8   6 94.6978 29.9928  28
  -8   6  -4 77.4725 41.6862  39
   4   8  -6 108.853 35.0816   9
  -8   4  -6 106.638 30.6408  44
   6  -8  -4 95.5600 37.1743   9
  -4   8   6 100.651 29.4299  23
   4   8   6 110.837 32.1908  23
   6  -4   8 72.0799 27.5128  38
   4  -6  -8 93.3079 53.2746  14
   6   8  -4 91.1847 40.0387  40
   4  -8   6 80.9813 30.9719  22
  -8   6  -4 142.755 27.6513   2
   4   6   8 83.1677 23.1131  22
   4  -6   8 136.082 42.6170  14
   8   6   4 91.4143 32.6147  23
   4  -8   6 110.346 39.9256  13
   8  -6   4 117.678 41.1317   6
  -8   6  -4 55.9989 46.8499  21
   8  -4   6 113.458 39.7285  13
  -4   6  -8 118.834 31.2224   1
  -6  -8   4 69.3354 47.9755  18
  -4   6  -8 101.010 37.9102  12
  -8   4   6 86.3300 26.4058  20
   8   4  -6 66.9011 33.9314   9
  -4  -8   6 71.3643 21.7992  27
   6  -8  -4 98.7077 25.7895  31
  -4   8  -6 92.3175 25.6250   1
  -6   4   8 47.2666 28.1232   7
   4  -6   8 110.572 28.4748   8
   4   8  -6 61.7183 40.3299   1
   8  -4  -6 49.9397 48.8152  14
   4  -8   6 102.542 29.0143   8
  -6  -8   4 125.706 49.0956  11
   8  -6  -4 131.457 37.2776   9
  -6   4   8 114.568 25.8601  39
   6  -4  -8 106.729 32.9438   9
  -8   6  -4 149.462 34.0350  12
   8  -6  -4 104.018 35.2833  34
  -8  -6   4 73.7341 25.2821  27
  -4  -8  -6 207.564 31.5436   7
   6  -8   4 90.9469 28.7833  31
   4  -6   8 149.693 33.9663  37
   6   8   4 149.412 58.7473  43
  -4  -8  -6 86.8470 26.7989  38
  -6  -8   4 78.1243 27.0934  37
  -8  -6   4 96.9252 32.5407  37
  -8   6   4 87.4790 34.8870   7
   4  -8   6 102.892 28.8679  36
  -4  -6   8 74.9660 21.6110   8
  -4   6   8 166.753 36.0899  17
   8   6   4 442.405 86.0531  12
   6  -4   8 94.3218 27.4360  32
   8  -6   4 135.817 47.5755  13
   4  -6  -8 43.1954 40.4510   4
   4   8   6 75.2853 44.0039  25
   8   6  -4 84.5041 44.2755  34
  -6  -4   8 30.0305 52.7524  18
   4  -6   8 97.3592 30.6831  36
  -8   6   4 87.2016 31.9457  21
   8   6  -4 95.0813 38.5837   9
   6   4   8 49.3723 37.8323  15
  -6   8  -4 88.8001 42.7914  39
   6  -4   8 66.1920 23.8467   8
   6  -8  -4 166.413 31.6596  34
   4  -8   6 433.573 42.7109  24
  -6   8   4 81.1510 28.2820  21
   6  -8  -4 75.1653 45.4215   4
   8   4   6 99.4266 27.0447  32
  -8  -6   4 75.6819 45.0176  18
  -6  -4   8 21.2158 52.0706  11
  -6   4   8 79.8227 25.7908  35
  -6   8   4 62.5260 30.9154  35
  -4  -8   6 67.4472 22.4599  42
   6   4   8 79.0431 26.3947  32
  -6  -8   4 84.4278 23.7559  42
   4  -6   8 223.421 33.9643  27
   6   4   8 78.1622 26.8129   8
   8   6  -4 118.465 65.6861  19
   4   8  -6 45.6352 41.8944  28
   6   8   4 85.5092 45.8583  34
   8   4   6 148.245 43.4081  15
  -6  -4   8 68.9121 21.6105  35
   8   4  -6 77.8660 47.2255  34
  -8   4   6 131.290 29.6099  35
   4   6   8 361.934 40.6241  30
   6   8   4 99.3950 25.5829  22
   6  -4  -8 74.0596 37.3542  34
  -4   8   6 104.576 29.3528  39
   4  -6  -8 81.6655 33.4412  34
   4   8   6 145.003 42.5467  29
  -6   8   4 74.3623 29.8731  39
  -4  -8   6 62.5116 23.9829  37
   4  -6   8 133.974 42.6235  16
   4   8  -6 65.9512 41.4456  12
   6  -4  -8 102.389 39.8418  41
   4  -8   6 97.8699 27.9014  27
   8  -4  -6 84.8275 38.6966   4
   4  -8  -6 76.0422 29.4036  33
   8  -4  -6 166.714 42.2450  34
   4  -6   8 259.517 32.8554  35
   6  -4   8 61.4512 30.9338  36
  -6  -8  -4 86.9128 27.6091   7
  -4   8  -6 86.9674 43.3965  26
   6  -8   4 77.3382 27.9940  27
   8   6  -4 49.6374 51.8087   1
  -8   6   4 101.474 32.8260  35
   8   6   4 160.082 28.7090  30
   8  -6   4 108.146 40.7467  24
  -8   4   6 141.292 42.6199  13
   4   6   8 85.9152 26.9131   8
  -6  -8   4 56.8202 35.3202   3
   6  -8   4 103.609 52.5964  14
   8   4  -6 104.220 32.1525  41
  -6  -8   4 84.3016 27.0508  36
  -6  -4   8 181.977 30.5457  42
   4  -6   8 157.414 32.2389  24
   6   8  -4 43.1201 58.8313  19
  -4   8   6 83.2791 26.9010  32
   6   8   4 119.111 33.4705  23
  -8   4   6 91.8163 30.7140  32
  -8   6   4 73.3455 31.0409  32
  -6   4   8 153.779 75.6536  18
  -8   4  -6 68.7731 42.5563  21
   4  -6  -8 81.8520 37.1146  41
  -8  -4  -6 167.230 31.7651   7
   8   4   6 82.7826 57.9734  19
   6  -4   8 135.081 41.0435  15
  -4  -6   8 76.9199 23.2140  42
  -6  -8  -4 78.7195 28.8906  36
  -8  -4   6 31.2923 32.6163   3
  -4   6   8 213.532 32.8540  28
   8   6  -4 90.5011 32.4116  41
  -8  -6  -4 84.3265 23.7936  44
  -8   4   6 100.341 26.4967  39
   8   6   4 82.0542 42.3921  25
   6  -8   4 505.630 53.8296  24
   6  -8   4 112.758 47.1529   6
  -4   8  -6 171.795 49.7662  39
   8  -4  -6 86.5205 36.0055  25
   6   8  -6 2203.03 105.853  40
  -8  -6   6 2953.08 135.203  18
   8  -6  -6 1951.83 90.8464   4
   6   6   8 2718.92 99.1841  30
  -6  -6   8 2128.07 127.970  18
   6  -6   8 2334.52 93.6738  22
   6  -6   8 2726.24 115.284  13
  -8   6   6 2650.97 89.6636  26
   8  -6  -6 2622.30 100.605  33
   8   6   6 2078.05 88.1734  23
   8  -6  -6 2658.30 112.554  41
  -6   8   6 2481.66 109.550  17
   8  -6   6 1995.68 104.724   6
  -6   6  -8 2533.16 105.027   1
  -6   8   6 2635.47 83.7865  21
   6  -6   8 2008.49 84.1857   8
   6  -8  -6 2547.27 94.6982  33
   6  -8  -6 2202.92 98.8229  41
   6   8  -6 2206.78 108.997  29
   6   8   6 2545.22 90.5934  22
   6   6   8 2245.92 80.5265  32
   6   6  -8 2432.79 106.238  29
   8  -6  -6 2394.29 113.963  14
   8   6   6 1941.70 100.630  34
  -6   8  -6 2061.69 90.2961   2
  -6  -8   6 2469.24 113.513   3
   6   8   6 2039.34 106.029  25
  -6   8   6 2269.57 88.8270  28
   6   8   6 2402.38 93.6072  30
   6   8   6 2121.80 90.9558  23
  -8   6   6 2021.42 95.7136  17
  -6   8  -6 1954.74 87.1395  28
  -6  -8  -6 2252.18 86.0549   7
   8  -6   6 2190.63 93.1976  27
   6  -6   8 2250.96 89.7080  27
  -6  -8   6 2454.49 89.8992  37
   6  -8  -6 2021.34 96.0732   4
  -6  -8   6 2096.55 116.105  11
   6  -6  -8 2250.28 115.500  16
  -6  -8   6 2552.99 82.1028  27
   6   6  -8 2365.16 101.903  40
  -6   8   6 2705.18 84.0184  26
  -8  -6   6 2410.85 77.0279  27
   6  -6   8 2284.86 97.5258  36
   8  -6  -6 2356.32 114.304  16
  -6  -6   8 1950.66 127.179  11
   6   6   8 2580.52 123.215   6
  -6  -6   8 2014.53 102.275   3
  -8   6   6 2639.77 89.8212  21
   8  -6   6 2223.65 93.2871   4
   8   6  -6 2961.66 112.504   9
  -6   6   8 2603.36 85.0702  26
  -6   8  -6 2261.79 104.349  12
  -6  -6  -8 1489.14 71.3373  10
   6  -8   6 2690.84 124.407  16
   8  -6   6 2631.47 114.457  14
   8  -6   6 2745.77 117.468  16
  -6   6   8 2537.67 91.4401  28
  -6   8  -6 2269.06 101.717  26
   6  -6   8 2335.76 112.491  16
  -6  -8   6 2001.13 113.234  18
  -8   6   6 2491.96 91.4788  39
   6  -6   8 2354.95 112.447  14
  -8   6   6 2621.63 95.4669  35
   6   8  -6 2321.53 112.137  25
   8   6  -6 2432.68 110.498  25
  -6   8   6 2282.37 88.6193   5
   8  -6  -6 2601.99 112.524   9
  -6   8   6 2596.35 94.8709  23
   6  -6  -8 2606.94 111.374   9
   6   6   8 2392.36 87.8887  22
  -6  -8   6 2374.11 82.2275  42
   6  -8   6 3159.55 109.735  24
  -8  -6   6 2475.04 85.9915  42
   8   6   6 1514.05 136.161  12
   6   6   8 1965.61 80.4953  23
   8   6  -6 2218.71 97.1283  29
   6   8  -6 2659.64 105.082   9
   6   6   8 2384.12 94.8453   8
   6  -8  -6 2468.16 118.701  14
   6  -8  -6 2094.84 84.8379   3
   8  -6   6 2391.19 98.9494  36
  -6   8  -6 2283.78 103.340  39
   6   6  -8 2776.34 107.475   9
  -8   6  -6 2557.37 94.4979   2
   6  -6   8 1939.85 111.011   6
   8   6   6 2540.25 95.8888  22
   6  -8   6 2236.16 92.0113  22
  -8   6  -6 2919.70 110.959  12
   6  -8   6 2181.14 97.5809   4
   8   6  -6 2502.39 97.7866  40
  -6   6   8 2722.52 87.7408  21
  -6   6  -8 2154.03 94.0135  39
  -8   6  -6 2020.99 93.7615  39
   8  -6   6 2628.88 122.250  15
  -8  -6   6 2965.72 136.627  11
   8   6  -6 1977.50 127.337  19
   6  -8   6 2614.96 121.902  14
  -8  -6   6 2607.43 84.8337  20
   6   8  -6 2086.07 106.049   1
   8  -6   6 2565.06 90.3630  31
   6   6  -8 2612.71 131.720  19
   6   6  -8 2352.62 111.809  25
   6  -8   6 2320.43 92.6041  27
  -8  -6   6 2640.79 95.4931  37
  -6  -8   6 2589.07 88.7125  36
  -8  -6   6 2421.41 78.4637  36
   8   6   6 2195.30 86.0725  30
  -6   6  -8 2642.52 111.686  12
  -6   8   6 2799.05 97.8889  32
   6  -8   6 2196.51 117.258   6
   6   8   6 1872.77 138.409  12
  -8   6   6 2487.27 94.2037  32
   6  -6  -8 2560.71 110.110  41
   6  -8   6 2293.94 92.8163  36
  -8  -6   6 2598.95 110.100   3
   8  -6  -6 2300.16 97.6490  34
   8  -6   6 3181.56 116.845  24
   6  -8  -6 1832.34 92.2846   9
  -6   6   8 2516.40 89.1262  39
   6   6  -8 2267.72 112.377   1
  -6  -6   8 2391.60 85.6275  42
   6  -6  -8 2756.46 101.175  33
  -6  -6   8 2487.33 83.9421  20
   6  -8  -6 2579.60 94.6474  34
  -8   6   6 1413.51 87.4441   7
   6  -6  -8 2050.85 94.8815   4
   6  -6   8 3452.06 118.025  24
  -8  -6  -6 2452.32 87.0443  44
  -6   6  -8 2201.65 93.3510   2
  -6   6   8 2674.43 95.4171  32
  -6   6   8 2518.17 116.174  13
   8   6  -6 1902.51 110.455   1
   6  -6  -8 2444.96 100.577  34
   6   8  -6 2343.05 124.350  19
   6  -6   8 2324.45 92.3261  38
  -8  -6  -6 2051.77 82.3969   7
   6  -6  -8 2400.62 118.044  14
   8  -6   6 2439.45 95.7963  38
   6  -8  -6 2422.52 118.831  16
  -6   8  -6 2286.67 100.818  21
   8  -6   6 2472.88 113.136  13
  -6  -6  -8 1978.07 78.0401   7
   6  -8   6 2535.82 83.5106  31
   0   8  -8 41086.3 445.292  19
  -8   0   8 28271.4 355.416   7
   8   0   8 35813.2 389.911   8
   8   0   8 40221.0 441.954  24
   8   0  -8 37731.5 398.651  29
  -8  -8   0 36639.1 352.465  38
   0  -8  -8 40708.3 411.572   3
   8   8   0 45247.0 428.494   9
   0   8   8 32313.7 406.584  17
   8   8   0 48819.6 452.374  23
   8   0  -8 40228.9 453.471   9
  -8  -8   0 38636.5 411.393   3
  -8   0   8 43252.5 380.303  26
  -8   8   0 39064.1 402.450  39
   8   0  -8 36461.6 426.620   1
   0  -8   8 42641.3 380.645  27
   0   8   8 29847.7 320.111  39
   0   8  -8 39334.6 473.304  12
   8   0   8 35796.6 457.763   6
  -8   0   8 43413.6 361.489  42
   0  -8   8 34970.6 376.718  42
   0  -8  -8 46669.1 466.425  16
  -8  -8   0 39414.0 372.855  27
   0   8   8 39811.4 395.568  28
  -8   0   8 27845.0 471.413  11
  -8  -8   0 38618.9 389.691  36
  -8   0   8 43651.7 378.426  35
  -8  -8   0 41160.1 391.659  37
   8  -8   0 32337.2 465.699  15
  -8  -8   0 45132.8 464.487  18
   8   0  -8 41849.4 453.970  25
  -8  -8   0 40632.0 393.478   7
   8  -8   0 40248.0 386.460  33
   8   8   0 38107.2 454.701  25
  -8   8   0 39528.8 393.067  26
   0  -8   8 40254.0 451.301  14
  -8   0   8 27588.3 468.388  18
   0   8   8 38699.8 394.708  23
   0   8  -8 34763.7 396.913  40
   0  -8  -8 39154.5 401.056   4
   8  -8   0 40830.2 397.717  22
   0  -8   8 37971.8 427.731  13
   0  -8   8 41411.5 408.264   8
  -8   0  -8 43150.0 423.716   2
  -8   8   0 35257.6 400.810  44
   0   8   8 40417.2 393.531  30
   0   8  -8 45087.8 419.316  39
   0  -8   8 40615.1 456.312  16
   8   0   8 33975.0 388.106  22
   0  -8   8 38376.4 394.585  37
   8  -8   0 36597.9 381.865   9
  -8   8   0 34839.6 439.550  17
   8   8   0 42900.2 427.047  41
  -8   8   0 39909.8 393.937  21
   0  -8   8 37936.6 373.566  35
   8   0  -8 41674.3 479.724  19
  -8   0   8 45967.7 401.307  20
   8   0   8 27646.1 336.656  31
   8  -8   0 32725.7 423.466  16
   8   0  -8 42721.9 452.828  34
   0   8   8 31040.4 341.266  32
   0  -8   8 42302.0 479.040   6
   8  -8   0 43928.1 393.399  41
   0   8  -8 43879.1 428.024  29
   8   8   0 42992.0 474.261  34
  -8  -8   0 45914.2 467.201  11
   8  -8   0 32514.9 421.956  14
  -8   0   8 43412.9 383.930  21
   8   8   0 35089.1 518.270  12
   0  -8   8 39677.5 403.175  36
   0   8  -8 33547.2 413.250   2
   0   8  -8 38778.1 418.916   1
   8  -8   0 29721.6 375.920   4
   0  -8  -8 46006.9 463.298  14
   8  -8   0 42106.3 393.798  31
  -2   8   8 316.153 57.1191  13
   2   8   8 424.970 44.7356  24
  -2   8   8 266.933 42.7462   5
  -2  -8   8 374.709 65.4289  18
   8   2   8 268.466 42.3212  30
   8  -2   8 357.371 57.3572  15
  -8  -2   8 136.040 46.5896   3
  -8  -2   8 178.446 61.6049  18
   2   8  -8 278.022 57.5763  12
   2   8  -8 265.081 53.8457  29
   2  -8   8 310.054 56.2560   6
   8  -2   8 280.656 34.6592  31
   2   8   8 204.592 32.8630  28
  -8  -2  -8 245.057 40.3658  10
   8  -8   2 291.666 74.6198  15
  -8  -2   8 389.169 37.6409  37
  -8   8   2 254.029 49.5092  17
   8  -8   2 506.587 62.2442  24
   2  -8   8 321.518 36.3697  38
  -2   8  -8 332.716 54.3439  28
   8   2  -8 252.569 46.3194   9
   8  -8   2 309.382 41.8765  27
  -8  -8   2 291.044 58.5263  11
   8  -8  -2 262.370 44.7706   9
   8   2   8 255.168 50.4161   6
  -2  -8   8 289.236 33.6956  27
   8  -8   2 309.640 40.0002  22
  -8   8  -2 295.717 42.2387  44
  -8  -8   2 276.094 35.5888  27
  -2  -8   8 383.138 67.7632  11
  -8  -8  -2 296.550 36.4247  27
  -2  -8   8 294.621 38.4835  37
   8  -8  -2 242.629 68.9931  14
  -2   8   8 380.304 44.2128  28
   8  -2   8 209.232 51.5837   6
  -8   8   2 327.763 43.9325  26
  -8   8  -2 278.169 49.5037  26
  -8   2  -8 321.314 40.1727   2
  -8   8   2 233.359 38.0920  44
   2  -8   8 309.633 53.4494  16
  -8   8   2 211.442 40.6256   5
   2  -8  -8 280.081 64.9610  16
   8  -2   8 379.171 48.8741  24
   8   8   2 314.930 59.4666  25
   8  -8  -2 274.790 70.3250  16
   8  -8   2 292.248 67.9596  16
   2  -8   8 262.665 39.3366  37
   8  -2  -8 277.658 50.2399  41
   8   2  -8 491.912 63.6066  34
   8   8  -2 320.719 41.6833  23
  -8   8  -2 269.993 42.4991  12
   2   8  -8 330.938 53.4053  19
  -2  -8   8 296.320 38.7543  42
  -8  -2   8 281.995 35.0666  42
  -8   8   2 273.902 39.8248  39
   8   8   2 321.817 45.5179  23
   2  -8  -8 862.997 74.3855  41
  -8   2   8 532.462 43.8513  21
  -8   2   8 533.569 42.6622  26
   8  -8   2 234.639 64.4199  14
  -8   2  -8 237.151 50.3566  26
  -8   8  -2 350.014 52.0397  21
  -8  -2   8 195.482 63.5508  11
  -8   8   2 298.833 43.4079  21
   8   2   8 285.809 37.4784  22
   8  -2   8 243.901 37.5021  38
  -2   8   8 459.469 42.3839  35
  -2   8   8 396.261 41.2280  32
   8  -2  -8 318.172 49.5484   9
   8   8  -2 341.028 51.2390   9
  -8   2   8 405.240 54.4369  13
   8   8   2 345.453 63.2526  34
  -8   8  -2 333.300 51.2735  39
  -8  -8   2 335.480 43.1772  36
  -8  -8   2 280.425 45.9195   3
   2   8   8 271.258 32.5780  32
  -2   8  -8 626.283 63.8539  39
   8   8   2 207.229 79.9762  12
   8   8  -2 349.204 47.3399  41
   2   8   8 301.763 41.5721  30
   8   2   8 285.758 37.2180   8
  -8  -8   2 289.233 41.2480  37
  -8   2   8 179.133 40.0295   7
   2  -8  -8 280.251 65.3864  14
  -2   8  -8 289.297 47.7326   2
   2  -8   8 324.418 38.1378  27
   2  -8   8 320.735 53.4435  14
  -8  -8  -2 346.846 43.2564  36
   8   2  -8 218.203 64.6695  19
  -2   8  -8 298.480 45.7298  40
  -8  -2   8 333.478 35.3574  21
   2  -8   8 292.119 37.9140  35
   8  -8   2 289.562 36.7044  38
  -8  -2  -8 323.713 39.8702   2
  -2   8   8 663.201 62.0767  17
   8  -2   8 376.244 42.0506  32
  -8   2   8 285.014 35.8707  32
  -8  -8  -2 412.074 45.9695   7
  -8  -2   8 333.083 34.6776  26
   8  -8  -2 313.795 38.4964  31
   2  -8   8 298.328 39.7670  36
  -8  -2   8 323.173 38.5203  20
  -8   2   8 370.085 38.4658  20
  -2  -8   8 339.781 40.7388  36
  -8  -8   2 231.385 33.2530  38
  -2  -8   8 290.988 36.9921   8
  -2  -8   8 315.419 37.0019  35
   2   8  -8 331.935 54.9702  28
  -2   8   8 464.472 53.8322  23
   8  -2   8 239.852 36.5259  22
   8   2   8 237.612 51.3944  15
  -8   8  -2 294.663 50.2971  17
   2  -8   8 300.487 40.4484   8
   8  -8  -2 225.585 50.6257   4
   8  -8  -2 460.272 50.6573  41
   8   8  -2 393.088 60.3545  34
  -2   8  -8 283.339 42.8128   1
   8  -2  -8 308.437 55.6285  34
   8   8   2 355.315 39.3241  22
   2   8  -8 280.483 47.7420   1
  -2   8   8 264.147 35.6021  39
  -8  -8   2 341.493 60.1945  18
   8   2  -8 193.795 54.4619   1
   8   8  -2 283.444 63.9886  12
   8  -8  -2 343.237 45.9201  33
   2  -8  -8 734.791 60.7004  33
  -2  -8   8 293.587 50.3734   3
   2   8  -8 287.085 48.9268  40
   2   8   8 253.794 39.9052  23
   8   2   8 398.933 40.5779  32
  -8  -8   2 323.202 42.4439   7
   2   8   8 531.605 58.5516  17
   8  -2  -8 310.810 54.2269  25
  -2   8  -8 396.900 61.3055  12
  -2  -8  -8 382.536 47.5406   3
   2   8   8 252.812 30.5101  22
  -8   2   8 350.212 37.0425  35
   8  -8   2 264.899 49.1205   4
   2  -8   8 341.028 49.6718  13
   8  -8   2 308.320 40.4028  31
   2  -8  -8 246.460 49.7796   4
  -8   2  -8 211.888 47.6800  21
   8   2  -8 339.234 52.7683  29
   4  -8  -8 13132.2 262.640  14
  -8  -8   4 13720.6 260.319  18
   8   8  -4 13964.8 268.570  25
  -8   8  -4 12877.1 230.343  12
  -4   8  -8 12913.1 232.981  39
  -8  -8   4 13312.2 200.856  27
  -8  -4   8 10256.7 257.837  18
  -8   4   8 7536.55 191.389   7
   8  -8  -4 13792.5 240.536  41
   4   8   8 13019.3 227.946  30
  -8  -4   8 14236.5 214.065  37
  -8   4   8 14439.6 223.302  32
  -4   8  -8 11623.3 214.968  28
   4  -8  -8 11579.1 223.176  41
   4  -8   8 13195.2 234.692  36
   8  -8   4 11624.4 241.816   6
   8  -4   8 16304.4 301.983  15
   8   8  -4 12552.4 226.390  29
  -8   4  -8 10665.7 206.722  21
   4  -8   8 12916.7 211.746  22
   4  -8   8 11939.9 268.451   6
  -8   8   4 10124.1 217.892   7
   8  -8  -4 10803.4 211.281   4
  -4   8   8 13714.3 225.124  28
  -8  -4  -8 14055.1 225.469   2
   8   8  -4 10313.8 241.976   1
  -8   8   4 9321.58 223.075  17
   8  -8  -4 12918.5 204.094  31
  -4   8  -8 12538.3 253.734  12
   8  -4   8 11448.0 253.495   6
   8  -8   4 14028.0 234.513  27
   8  -4  -8 13075.5 229.429  33
  -8  -4   8 13889.3 210.690  42
  -8  -8  -4 12201.4 208.384   7
   4  -8  -8 11400.7 218.494   4
   8  -8  -4 12248.6 232.251   9
  -4  -8   8 17113.1 319.568  11
   4  -8  -8 13175.4 262.966  16
   8   4   8 11949.1 256.476   6
  -8   4  -8 15368.8 263.997  12
  -4   8  -8 12198.2 239.093   2
   8  -8  -4 12623.0 199.283  34
   8  -8  -4 12010.5 244.429  16
  -8  -4   8 10343.0 260.784  11
   8   4  -8 14605.0 254.047   9
  -4  -8   8 14327.2 259.147   3
   8  -8   4 12433.3 223.371  22
  -8   8   4 14044.6 207.888  26
   8   4  -8 12411.7 235.574  40
   4   8  -8 13135.4 260.370   1
   8  -8   4 12330.9 258.514  16
   8  -4   8 12748.4 224.124  22
  -8   8  -4 13084.7 239.150  26
  -8   4  -8 11103.5 213.681  26
  -8  -8   4 13402.9 220.713  37
   4  -8   8 13879.7 262.843  13
   8  -8   4 11355.8 254.978  13
  -4  -8   8 13962.3 202.103   8
  -8  -4   8 14291.7 215.517  20
   8   4  -8 13729.8 258.658  25
  -8   8  -4 12671.8 225.889  44
   8  -4  -8 11495.5 224.488  25
  -8   8  -4 11521.5 201.474   2
   8  -8   4 13755.3 216.741  31
  -4   8   8 13648.1 224.897   5
   8  -8  -4 12005.0 242.965  14
   8   8  -4 14411.1 228.522  41
   4  -8   8 19326.6 256.593  24
   8  -4  -8 12646.4 242.458  14
   8  -4  -8 13118.0 243.495  34
  -8  -8  -4 10703.2 196.023  36
   8   8  -4 13492.3 240.282   9
   8  -4  -8 11043.5 206.017   4
   8  -8   4 15644.1 264.337  24
  -8   8   4 13075.5 226.303  40
   8  -4  -8 12568.0 242.772  16
   4  -8   8 11987.1 214.937  37
   8  -8   4 12244.5 255.292  14
   8  -4  -8 14881.1 271.618   9
  -4  -8   8 14036.3 218.569  36
   8   4  -8 13752.9 237.114  29
   8  -4   8 12841.7 228.975  38
  -4  -8  -8 13957.3 211.988   7
   4  -8   8 12435.4 207.395  38
  -4   8   8 14252.0 216.505  35
  -4  -8   8 16701.4 313.200  18
   4   8   8 13872.2 205.359  22
  -4  -8   8 12778.2 205.856  42
  -8   4  -8 10299.9 192.632  39
  -8   8   4 14076.8 210.038  21
  -4  -8   8 13978.5 220.710  37
   8  -8   4 12960.2 219.142  38
   8   4   8 13227.6 228.908   8
  -4   8   8 14729.0 276.545  13
  -4   8   8 17114.1 270.802  17
   8   4  -8 12580.7 258.078   1
  -8  -8   4 13178.0 195.228  42
   4   8   8 11616.8 209.150  23
  -8   8  -4 11490.4 215.017  39
  -8   8   4 13515.8 215.861  39
  -4   8  -8 13381.3 229.517   1
   8  -8   4 10399.5 210.117   4
  -4   8   8 13834.0 224.205  32
  -8   8   4 13305.0 225.787  32
   8   8   4 9865.37 232.055  34
  -8   4   8 13010.7 212.097  35
  -8   4  -8 13461.2 229.047   2
  -8   8  -4 13020.9 235.545  21
  -8   4   8 13896.7 211.244  39
   4  -8  -8 13902.4 220.584  33
  -8   8   4 12629.9 215.828  35
   8   4   8 13131.7 225.574  30
   8  -4  -8 13284.8 249.657  41
  -8  -8   4 13922.2 262.220  11
   8   4  -8 13673.6 296.310  19
  -8  -4   8 9035.17 213.270   3
  -8  -8   4 12669.1 226.168   3
  -8   4  -8 15089.9 256.109   1
   4   8  -8 12815.9 259.312  19
  -4   8   8 14387.7 217.590  39
   4   8  -8 13604.0 249.017  29
  -8   4   8 11999.0 244.495  13
   8   8   4 12280.2 254.711  25
   8  -4   8 14292.6 257.827  13
  -8  -8   4 13895.9 212.120  36
  -4  -8  -8 12049.0 203.137   3
   8  -4   8 16350.0 235.403  32
   8   8   4 13690.5 211.689  30
  -8  -8  -4 11441.2 187.220  27
  -4  -8   8 12107.2 190.479  35
   8  -4   8 18545.2 291.353  24
   4  -8  -8 12231.9 216.512   3
  -4   8   8 14353.7 229.771  23
   8   8  -4 10292.2 254.847  19
   4  -8  -8 12134.4 231.462   9
   8   4   8 13060.9 200.343  32
   4   8  -8 13949.3 232.051  28
   4  -8   8 12668.0 214.010  27
   8  -4   8 12917.2 202.170  31
   4  -8   8 11432.1 208.704   8
   8   4   8 13691.5 225.524  22
   4   8  -8 13154.9 224.826   9
   8   4   8 10308.7 239.576  15
   8   8   4 14457.5 227.573  22
  -8  -8   6 221.883 57.4813  18
   6   8   8 166.940 42.7863  23
   8   8   6 244.184 41.5492  30
   8  -8  -6 261.442 45.3123  33
   8  -6  -8 315.490 73.7650  14
  -6   8  -8 214.035 59.5502  21
  -8   8  -6 222.882 47.6970  12
   8  -8  -6 240.026 76.4159  16
   8   8   6 475.301 74.4501  25
   8  -6  -8 250.384 52.9094  41
   8   8  -6 258.612 62.7410  29
   8   6  -8 195.707 58.8140  29
   8   8  -6 205.616 53.3691  40
   8  -8   6 293.388 66.6128  16
  -6   8   8 222.113 39.1064  28
   6   8   8 178.026 41.2531  30
  -8  -8   6 185.947 57.8081  11
  -8   8   6 284.048 39.5640  26
  -6   8   8 247.460 40.8310  32
   8   8  -6 190.298 64.6099  25
   8  -6   8 194.337 40.2499  27
   6  -8   8 258.067 46.2393  27
   6  -8  -8 250.777 72.1502  16
  -6   8   8 286.117 54.7045  17
   8  -6  -8 301.925 74.0314  16
  -8  -8   6 267.531 35.6502  27
  -8   6   8 253.553 36.7787  26
   8  -6   8 290.925 61.7433  16
  -6   8  -8 230.362 61.0023  26
   6   8  -8 261.683 60.3859  29
   8   8   6 182.479 100.679  12
   8  -6  -8 220.000 51.3292  34
   6  -8   8 232.965 59.8238  16
   6   8  -8 245.800 59.3523  25
   8   6  -8 150.784 62.3257  25
   8  -6  -8 156.075 48.3124  25
   8  -6   8 191.421 54.5765  15
   8   6   8 230.115 38.9295  22
   8  -8  -6 198.232 48.0540  41
  -6   8   8 234.765 40.3272  35
   6  -8   8 199.072 42.7859  22
   8  -8   6 236.534 39.8982  38
  -6  -8   8 364.792 43.6186  37
   8  -8   6 213.534 42.4626  36
   8  -8  -6 191.140 47.5179  34
   6  -8  -8 209.616 50.0054  41
   8   8   6 217.292 46.1763  23
   8   6  -8 194.844 52.7187  40
  -8   8  -6 183.226 51.4647  39
   8   6  -8 222.533 79.3433  19
  -8   6   8 307.765 39.9475  39
   8   6   8 280.744 44.1950  30
  -8   8  -6 283.399 63.1097  26
   8  -8   6 292.155 52.9723  24
  -6   8   8 287.741 36.3259  26
  -8   6   8 238.327 39.0073  35
   8  -8   6 281.525 41.6673  31
  -8   6  -8 206.620 53.4728  39
  -6   8  -8 224.253 56.7069  39
  -8  -8   6 243.539 38.1086  36
  -8   8   6 233.704 40.2409  39
  -8   8   6 193.188 53.1180  17
   6  -8   8 194.492 37.5167  38
   8  -6   8 182.200 42.2407  36
   8  -6   8 200.978 42.6576  22
   8  -8   6 214.656 59.8104  13
  -8   8   6 276.160 39.7943  21
  -8  -6   8 250.993 38.9728  37
   6   8   8 213.607 38.1002  22
  -8  -8   6 280.805 40.5208  37
  -8   6   8 253.416 38.2092  21
  -8  -8   6 252.959 36.0573  42
   8  -6   8 222.275 41.6185  38
   8  -6   8 257.841 53.9845  13
  -8  -6   8 296.372 76.2006  11
   6  -8   8 260.255 54.4807  36
  -8  -8  -6 187.929 39.3298  36
  -8   8   6 242.187 41.2984  35
   6  -8  -8 195.000 69.9551  14
  -8   8  -6 247.255 62.6868  21
   6  -8   8 570.746 58.9568  24
  -8  -6   8 263.391 37.1797  20
   8  -6   8 266.867 51.6400  24
   8  -8  -6 205.067 74.2717  14
   8  -6   8 318.242 61.6288  14
   6  -8   8 248.497 59.8353  14
   6   8  -8 245.496 55.9822  40
  -6   8   8 262.095 35.6375  21
   8   6   8 164.358 39.3997  23
   8  -6  -8 268.167 51.0614  33
   6  -8  -8 245.929 44.7066  33
  -8   6   8 236.451 56.9642  13
  -8   6  -8 269.519 48.7922  12
  -6   8  -8 208.973 61.6503  12
   6  -8  -8 271.445 47.5126  34
  -6  -8   8 256.947 37.1183  36
  -8   6   8 240.581 38.7490  32
   8   8   6 265.093 40.8547  22
   6   8  -8 182.635 77.6260  19
   8   8  -6 276.288 81.5446  19
  -8  -6   8 252.747 36.3235  42
  -8  -6   8 293.408 73.9156  18
   8  -8   6 305.873 64.3421  14
  -6  -8   8 257.678 37.7738  42
   8  -8   8 26773.9 368.338  38
   8   8  -8 23453.4 442.430  19
   8  -8  -8 22536.3 373.808  14
   8   8  -8 25002.8 369.091  29
  -8   8   8 28006.3 362.195  32
  -8  -8   8 27936.7 459.710  18
   8  -8   8 41456.9 476.334  24
  -8   8   8 28589.0 385.597  17
   8  -8   8 24899.2 355.017  27
   8   8   8 27890.2 361.190  22
   8  -8  -8 22600.4 374.635  16
  -8   8   8 28607.3 326.672  26
   8  -8   8 29480.1 435.198  16
   8  -8  -8 27191.3 398.987  41
   8   8  -8 26224.2 397.997  25
  -8  -8   8 25879.1 330.718  42
   8  -8  -8 22555.0 324.629  25
  -8   8  -8 22143.3 346.606  21
   8   8   8 25073.3 351.905  30
  -8   8   8 28334.7 351.628  39
   8   8  -8 27685.0 379.994  40
   8  -8   8 26599.7 373.679  36
  -8   8   8 27549.5 355.082  35
  -8  -8   8 28080.4 463.315  11
   8  -8   8 27269.6 424.965  13
  -8  -8   8 27711.4 352.627  37
  -8   8   8 29880.4 334.178  21
  -8   8  -8 23331.7 356.732  26
  -8  -8   8 26545.1 309.773  36
   8  -8   8 27175.6 371.823  22
   8  -8  -8 23545.0 344.429  34
   8  -8  -8 26233.3 359.410  33
   8  -8   8 29472.5 431.823  14
  -8   8  -8 23052.4 347.579  39
   8   8   8 22715.3 340.250  23
  -1  -9  -1 3852.71 82.1819  31
   1   9  -1 3853.48 100.506  30
  -1   1   9 3819.39 83.4436  35
  -1  -1   9 3487.98 92.1045  37
   1  -9   1 3570.32 94.1811   3
  -1   9   1 3565.83 98.1405  30
   9  -1   1 3983.78 96.1995  22
  -1  -9  -1 3732.06 104.276   3
   1   9  -1 3942.01 117.531   2
  -1   9   1 4360.57 115.272   2
  -1   9  -1 3142.58 95.3615  44
  -9   1  -1 3370.66 99.1372  42
   1   1   9 3393.78 84.2209  32
   9   1  -1 3239.12 140.225  19
   1   9   1 3871.01 108.185  29
   1   9  -1 3934.27 109.123  29
   1   1   9 3530.68 75.4307  35
  -1  -1   9 3300.91 104.087  13
  -1  -1  -9 3354.82 93.4473  10
  -9   1   1 4021.32 101.093  21
   9   1  -1 3679.03 107.006  34
  -9   1   1 4474.95 110.787  17
   1   9   1 3465.00 86.3032  23
   1  -1  -9 3527.92 91.1474  10
   9  -1  -1 3558.90 89.3170   9
   1   9   1 4218.60 120.021   2
   1   1   9 3296.79 138.208  18
  -1   9   1 3591.01 99.9945  28
  -1  -9  -1 4132.01 116.670  11
   9   1   1 3742.08 94.6197  31
   1  -9  -1 3714.75 82.2384  27
  -1   9   1 3612.27 106.306  17
  -1  -9   1 3882.92 111.427  11
   9   1  -1 3693.06 103.058  33
   1  -1   9 2531.12 104.357   6
  -1   9  -1 3760.40 102.219  29
  -1  -1   9 3244.13 80.9057  21
  -9   1  -1 3800.47 98.2438  26
   1  -9  -1 4155.55 113.226  11
   1   1   9 4032.07 112.414  13
   1   1   9 2763.41 108.329   6
  -1   1   9 2723.75 94.3161   6
   1  -9  -1 3276.64 101.324   4
   9   1  -1 3621.61 99.3327  41
   1  -9   1 3822.70 87.2971  27
  -1  -9  -1 3752.70 81.8502  27
   1   1  -9 4298.94 109.582  19
   1  -1   9 3572.03 78.5665  35
   1  -9  -1 3827.86 119.240  14
  -1   1   9 3074.66 78.1098  26
   1  -9  -1 4003.47 121.207  16
   1   9   1 4119.08 107.910  40
   1  -9   1 4115.53 122.613  16
   9  -1  -1 3281.51 97.6530  34
  -1   1   9 3337.05 83.8699  20
   1  -9   1 4033.73 121.273  14
  -1  -1   9 3151.47 135.563  11
  -9   1   1 3956.30 99.8400  26
   1  -9   1 4132.05 89.5940  38
   1   9  -1 3191.79 96.0351   5
  -1   9  -1 3000.96 101.640   5
  -1   1   9 3118.64 143.343  18
   1   1   9 3355.22 140.406  11
   1   9   1 4802.37 138.455  12
   1   9  -1 4066.77 123.360  12
  -1  -1   9 2997.41 132.241  18
  -9   1   1 3520.88 99.5814  42
  -1   9   1 3473.15 107.313   5
   1   9   1 3653.03 103.598  25
  -1  -1   9 2827.77 104.369  16
   1   9   1 3346.75 101.720   5
  -1   1   9 4068.13 90.4961   8
   9   1   1 3421.45 99.5320  23
   1   1  -9 3449.30 95.6022  25
   1   9  -1 4209.59 111.750  40
  -9  -1   1 3822.11 100.949  42
   9  -1  -1 3838.11 135.862  15
   9  -1   1 4427.21 144.813  15
   9   1   1 4749.09 134.289  15
   9  -1  -1 3190.67 137.903  19
  -1   1   9 3983.63 87.2047  24
   1   1   9 3855.39 92.2957  24
  -1   1  -9 3631.70 96.7606  10
  -1   1   9 3479.33 107.665  13
   9   1  -1 2835.03 118.546   1
  -1  -1  -9 3618.71 91.6103   1
  -9  -1  -1 3969.26 113.319  20
   1  -9  -1 3754.09 101.432   3
  -9  -1   1 3862.05 103.154  20
   9  -1  -1 3266.78 97.6873  41
  -9  -1  -1 3677.83 99.4098  42
   1   1  -9 4001.25 104.362   1
  -9   1   1 3697.61 78.0634   2
  -1   9  -1 4033.63 110.765  40
  -9   1   1 3594.11 95.6247  44
  -1   1   9 3162.30 144.313  11
  -9  -1  -1 4336.04 107.988  17
  -1   9   1 3480.10 100.555  29
  -1  -1   9 3204.61 84.8966  20
  -9   1   1 3523.41 94.5360  37
  -1  -1   9 2944.30 104.592  14
   1  -1   9 3583.30 97.9165  37
  -1  -9  -1 4084.61 89.8157  38
  -1  -9   1 3486.46 98.8087   3
  -1  -9  -1 4207.42 117.582  18
   1  -1  -9 3275.88 94.3938   4
   1  -9  -1 4015.47 86.6904  31
  -1  -9   1 4540.83 88.6402   7
  -9   1  -1 3614.88 85.4987   2
   1  -9   1 3341.97 102.769   4
  -9  -1  -1 3608.87 107.466  37
   9  -1  -1 3434.60 88.7047  31
   9  -1   1 3358.70 94.2193  41
  -1  -1   9 3869.46 86.7529  35
  -9   1  -1 3759.08 98.3272  21
   1  -1   9 3742.87 95.0991   8
   1   1   9 3926.75 96.6501   8
   1  -1   9 3055.62 85.6094  20
  -1   9   1 2813.33 91.1857  44
   9   1   1 3417.98 97.2628  34
  -1   1  -9 3619.38 98.1660   1
  -1  -1   9 3811.26 89.3171   8
   9   1   1 3976.30 95.7126  22
  -9  -1   1 3528.69 92.4392  44
   1  -1   9 3385.32 104.428  13
   1   1   9 3302.38 86.2336  20
   9   1   1 3183.70 125.686   1
   1  -9   1 4376.37 89.2685  31
  -1  -9   1 4211.80 89.4717  36
  -1  -1   9 3988.14 81.7015  24
  -9  -1   1 4680.94 108.587  17
   9  -1  -1 3088.32 122.325   1
   1   9   1 3160.92 82.9008  22
   1   9   1 3629.17 99.6452  28
   1  -1   9 3615.57 83.4717  32
   9   1   1 3493.62 93.2255  41
   1  -1   9 4091.57 88.6928  24
   9   1   1 3583.61 101.566  33
   9  -1  -1 3613.65 102.738  33
  -1  -9   1 4070.14 88.1096  38
   1  -9  -1 3385.37 75.6153  33
   9   1  -1 3845.05 93.2476   9
  -9   1  -1 3777.19 110.265  20
   1  -9  -1 3922.40 84.9060  38
   1  -1  -9 3976.22 97.4606   1
   9   1   1 3565.73 147.251  19
   9  -1   1 3428.41 142.962  19
  -1   1   9 3651.74 87.2232  32
  -9  -1  -1 4218.44 108.016   7
  -1  -9   1 4063.15 88.1803  27
  -9  -1   1 4742.54 118.249   7
  -9   1  -1 4380.53 113.344   7
  -1  -1   9 3200.56 79.5469  26
   1   9   1 3887.11 108.880  17
  -9   1   1 4220.31 114.283   7
   1   9  -1 3689.09 102.570  28
  -1   9  -1 4173.66 121.967  12
   1   1  -9 3824.37 92.7757  10
  -9  -1   1 3748.09 103.064  37
   9  -1   1 3432.19 92.0691  31
   1   9  -1 3260.04 127.863  43
  -1   1   9 3159.60 79.7364  21
  -1   9   1 3438.17 121.532  43
  -1   9  -1 3656.33 107.417   2
  -1   9   1 4539.00 119.560  12
   1   1   9 3415.25 93.0376  37
   1  -9  -1 4261.94 114.307  18
  -1  -1   9 3606.52 83.3916  32
  -1  -9   1 3893.46 111.898  18
  -1  -9   1 4051.95 81.6928  31
   3   9   1 15826.0 270.720  12
   9   1  -3 16350.7 222.343  33
  -3   9   1 16276.7 211.805   2
  -3  -9   1 15834.5 171.129  31
   1   3  -9 15143.4 208.696  40
   1   9  -3 13725.2 228.159   2
   9   3  -1 16575.5 233.366  23
  -3   1   9 15553.2 178.881  24
  -1  -3   9 11198.7 227.858  18
   1  -9   3 17383.3 204.443  36
  -1   3   9 12843.3 171.730  21
   9  -1   3 16404.4 219.968  38
  -9  -1   3 14546.9 191.517  44
   1   9   3 15537.1 212.929  30
   3   9   1 15347.9 206.858  30
  -1   9   3 16258.8 217.507  30
   3   9  -1 17286.7 209.374  30
   1  -3   9 14355.8 200.975  36
  -3  -1   9 15130.3 190.211  21
   9   3   1 10924.2 243.059  12
   9  -1   3 13074.8 294.411  19
  -3   9   1 13257.2 201.454  30
   3   1  -9 18061.4 236.805   1
   9  -3  -1 14624.4 209.770  41
  -1   9  -3 17133.5 238.071  40
   1  -3   9 14517.6 179.337  35
   1   9   3 15574.3 235.321  29
   3  -9  -1 13500.5 220.194   4
   3   9   1 15210.6 230.456  29
  -1   9  -3 15937.5 218.422  29
  -1   3  -9 14907.3 206.024  29
  -1   9   3 15135.3 227.577  29
  -3  -1   9 14794.8 187.626  26
   3  -1   9 11858.0 222.489  14
  -9  -1  -3 17189.3 228.719  17
   1  -9   3 15030.4 205.501   3
  -9  -3   1 14999.8 197.208  44
   1   3  -9 14761.1 215.809  29
   1   3   9 14650.8 193.850  32
  -1  -9  -3 16030.6 188.303  38
  -9  -3   1 14853.3 195.102  36
   9   1  -3 12196.6 242.767   1
  -9   3  -1 17022.7 237.119  17
  -9   1   3 15109.4 203.178  17
   1   3   9 16073.7 204.030   8
  -9   3   1 17232.4 253.269  17
  -3  -9   1 16334.8 195.056  27
   3   1   9 11459.2 213.873  15
  -3   1  -9 14973.2 219.689  10
   1   3  -9 15586.0 229.859   1
   3   1   9 15317.3 195.127  32
   3  -9  -1 16398.5 187.245  33
  -3  -9  -1 14866.2 223.332   3
  -1   9   3 16457.5 224.215  28
  -9   1   3 17240.0 219.250  42
  -3   9   1 15101.0 215.622  28
  -1  -9   3 17918.8 200.760  38
   3   9  -1 14845.8 204.069  28
  -3   9  -1 15550.8 220.488  28
   1  -3   9 10492.5 219.328   6
   3   9  -1 16035.8 231.268  25
  -9   1  -3 13608.2 221.961  20
   3  -9   1 18036.9 198.217  31
   1   9  -3 16183.0 226.190  28
   9   3  -1 18376.9 219.502   9
   9   1  -3 14853.3 213.308   9
  -1   9   3 15277.5 234.626  17
   1  -3   9 12440.4 228.217  14
   9   1   3 12763.9 191.541  23
   9   1  -3 14402.4 284.341  19
   9  -3   1 14267.8 197.122  41
   3  -1   9 10228.1 225.273   6
   9  -3  -1 13457.3 246.754   1
   3   9   1 16426.4 218.958  40
  -3   9   1 12904.3 224.849  43
   3   9   1 17848.2 246.695  17
   9  -1  -3 15834.7 220.872   9
   3  -1   9 14076.9 225.656  15
   3  -9   1 16080.4 252.262  14
   9  -1  -3 14850.7 221.353  41
   3  -9   1 16104.0 200.457  27
   1  -9   3 16705.0 201.843  27
   1   3   9 12004.1 224.651   6
  -1  -9   3 16752.2 198.606  27
  -3   9   1 14931.7 224.832  40
  -3   9  -1 16463.2 217.787  39
  -1   3   9 11522.4 208.912   6
  -3  -9  -1 16197.4 187.570  27
   1   9   3 17426.6 242.490   2
   3   9  -1 12450.0 231.018   2
  -1  -9  -3 14320.0 177.318  31
   1   9   3 13100.2 214.992   5
   1   9   3 16500.9 219.311  28
  -1   9   3 16010.5 265.880  43
   1  -3   9 19833.0 215.922  24
  -1   3   9 15070.2 179.402  35
   3  -9  -1 15957.2 253.537  16
  -3   1   9 14902.1 188.866  26
   3  -9   1 16164.5 254.088  16
  -1  -3   9 11305.4 230.439  11
  -1   9   3 15594.5 224.933  40
  -9  -1   3 18040.3 227.183  20
  -9   3   1 15629.4 213.821  26
  -9   3  -1 14453.4 205.400  26
   1  -9   3 14169.6 215.868   4
  -3   1   9 11062.9 273.265  11
  -3   9   1 13308.2 223.483   5
   3  -9  -1 16181.6 187.748  38
   1  -3   9 12592.6 229.470  16
  -1   9   3 13660.9 209.005  25
  -9   3   1 14750.4 211.565  44
   3   9  -1 13897.4 209.868  40
   1  -9  -3 16442.6 245.277  14
   3  -1   9 11905.8 224.845  16
   3   1   9 15783.7 202.640  30
   3   9   1 16537.6 240.653  25
  -3  -9  -1 16184.0 190.385  36
   3   9   1 13888.6 238.316   2
  -1   9   3 15893.6 238.465   5
   9   1   3 17509.0 222.919  22
  -1   9   3 13126.8 186.932  23
   9   3  -1 12795.6 188.522  25
  -1  -9   3 15242.1 217.725   3
  -9  -3  -1 16566.1 210.817  42
   1   9   3 13033.9 178.289  22
   3  -1  -9 16373.6 237.256  25
   9  -3  -1 12236.9 253.776  15
  -9   1  -3 18763.2 241.907  17
   9   1   3 12566.5 174.276  41
   9   1  -3 16199.6 231.533  41
   9  -1   3 17846.6 281.059  15
   9  -1   3 14202.6 205.865  33
   9   1   3 21374.3 292.350  15
  -3   9  -1 14022.4 213.382   2
   3   9  -1 14076.5 266.693  43
   1   9   3 16040.4 220.185  40
   3   9   1 15024.8 284.939  43
   9   3  -1 16864.3 223.834  33
  -9   1   3 14321.0 194.681  44
   9  -1   3 16128.8 215.607  22
  -3  -9  -1 16084.3 193.894  38
  -1   3   9 13414.7 172.710  20
  -3   1   9 15495.3 190.764  35
   9   3   1 12815.3 257.896   1
   1  -3   9 14102.2 195.985  20
  -3  -9  -1 16924.5 247.905  18
  -3  -1   9 15096.7 174.667  42
  -1  -3  -9 16591.6 215.850   4
   9   3   1 13066.5 208.141  34
  -3   1   9 15059.5 190.683  21
   9  -3   1 15468.0 296.296  19
  -9   1  -3 15053.0 200.095   2
  -1   9  -3 13290.7 205.732  44
  -9   1   3 16877.7 198.856  37
   1  -9  -3 15282.3 176.454  38
  -9   3  -1 14538.1 206.118  21
   9   3   1 15772.3 210.945  41
  -3  -9   1 16858.7 192.389   7
  -1  -3   9 15065.5 191.399  42
   9   1   3 13067.6 197.871  33
   1  -3   9 13323.7 220.758  13
   3   9   1 15103.8 198.165  23
   9  -1  -3 12887.1 244.040   1
   1   9   3 19452.8 269.722  12
  -1  -9   3 17175.9 243.841  18
   1  -9  -3 14425.8 221.174   4
   3   1   9 16472.8 208.635  24
   1   3   9 15607.2 231.063  13
   9   1  -3 14754.8 199.931  25
  -3  -9   1 17168.7 201.800  36
  -9   1  -3 15520.5 215.800  44
   9  -3  -1 13820.2 196.908  34
  -3   9  -1 15741.1 233.206  17
  -1  -3   9 14542.3 206.646  37
   3   9   1 14642.5 193.445  22
   3   9  -1 16414.3 202.434  22
   1  -9  -3 16221.6 244.482  16
   9   3   1 13483.1 290.863  19
   3  -1   9 13335.3 197.924  36
  -9   1  -3 18284.2 231.835   7
   1  -3   9 14184.5 201.427   8
   3   1  -9 20096.8 252.536  19
   1  -9  -3 15016.4 206.761   3
   9  -3   1 14996.2 206.364  31
  -9  -1  -3 14782.5 200.752   2
   9  -1   3 13441.8 185.838  23
  -3   9  -1 15435.5 235.880  12
  -9   3   1 14867.5 212.656  42
  -3  -1   9 13152.5 220.398  13
   9  -3   1 16254.1 216.338  22
  -3   1   9 15284.5 193.270  32
   3  -9   1 17013.2 198.980  38
   3  -1   9 13889.9 160.954  35
   3  -9  -1 16046.0 252.496  14
  -9   3  -1 16690.5 227.240   7
  -3   9   1 15166.8 210.399  39
  -9  -1   3 17350.9 217.688  37
  -9  -1  -3 13643.5 223.815  20
  -9   3  -1 14079.5 214.795  20
  -3   1   9 14450.0 233.564  13
  -1  -3   9 13373.1 179.615  36
  -9   1   3 18663.0 226.115  21
   3   1   9 14042.4 217.170  13
  -1   9   3 17542.7 195.861  39
  -9  -1   3 17841.1 238.969   7
  -3   9   1 16311.9 242.394  17
  -1   3   9 12770.9 170.054  26
  -9  -3  -1 15216.6 227.337  37
  -1   9  -3 14368.7 243.236  12
  -9   1   3 18894.2 225.941  26
  -9   3   1 13050.3 214.826   7
  -3  -1   9 16173.6 193.711  35
   1   9   3 15011.8 235.708  17
  -1   3   9 14556.0 188.881  39
   1  -9   3 17336.6 253.030  14
  -3  -1  -9 16227.5 209.499   1
  -9  -3   1 17331.3 222.122  20
   9  -1  -3 15264.4 219.442  33
  -3   1   9 11022.2 272.503  18
  -1  -3   9 15387.5 201.956   8
   1  -3   9 14609.9 195.829  42
   3   1  -9 14224.7 204.663   9
  -1  -3   9 15009.1 196.600  20
  -1   3   9 13439.3 189.155  32
  -9  -3   1 18525.4 217.343  17
  -3   9  -1 13782.9 212.461  44
  -9  -1  -3 13376.5 202.716  42
  -1  -9   3 17154.5 243.867  11
  -1   3   9 16709.2 190.576   8
   1  -9   3 17995.4 183.816  31
   1   3   9 17030.0 210.373  24
   3   1   9 11782.4 240.616   6
   3   9   1 14153.9 209.323  34
   3  -1   9 13055.9 215.285  13
   9   3   1 18058.0 210.082  22
   9   1   3 14757.6 193.031  34
   9  -3  -1 15580.2 198.710   9
  -9   1   3 15898.4 214.329  20
  -1   3  -9 14832.4 222.670   1
   3  -1  -9 16111.9 220.212   9
   1  -3   9 14797.5 214.306  37
  -9   3   1 16198.5 223.582  20
  -9  -3  -1 17606.9 238.492  20
  -1  -3  -9 14830.6 213.241  10
   9  -1  -3 15758.8 226.589  34
   9   1   3 15262.5 181.288  30
   9   3  -1 11501.7 244.702   1
  -9  -1  -3 14909.8 208.762  44
  -1  -3   9 14735.2 226.495  13
  -3  -9  -1 18587.5 213.726   7
   3  -1   9 15269.6 197.482  30
  -1   9  -3 15916.7 206.319  39
  -1  -3   9 13132.6 226.636  14
  -9   3   1 15644.0 214.955  21
   9   3   1 15883.1 220.088  33
  -9  -1   3 18300.7 211.218  17
  -9   1  -3 14856.5 212.131  21
   1   3  -9 18000.2 247.367  19
   3   1  -9 15282.8 225.869  25
   9  -3   1 14953.3 215.604  33
   1   9   3 16081.2 283.832  43
   3  -1   9 13878.8 205.261   8
  -3  -9   1 17536.3 201.945  38
  -1   3   9 15107.0 237.388  13
  -3  -9  -1 16940.6 248.026  11
   3   9   1 15258.9 199.790  28
  -9   3  -1 15886.9 190.345   2
  -9   1  -3 15503.3 217.414  26
   3  -1   9 14834.8 192.307  32
   1  -9   3 17223.9 253.749  16
   9   3  -1 13024.8 282.213  19
   1   9  -3 16681.5 236.792  29
  -9  -3  -1 16919.8 224.447   7
  -9  -1  -3 16919.3 220.724   7
  -1   3   9 15093.9 194.487  24
  -1   9  -3 12314.8 215.417   2
  -1  -9   3 13737.4 202.502   4
   9  -1   3 13479.9 202.934  31
   1   9   3 14749.9 225.092  25
   1  -3  -9 15570.3 215.619   4
   9   3   1 17253.9 209.497  31
   9   1   3 14428.4 205.378  31
  -1  -9   3 17125.5 205.640  36
   3  -9   1 13337.4 218.693   4
   1   9  -3 16363.2 259.907  12
  -1  -3   9 13052.2 227.768  16
   9  -3  -1 14920.7 200.882  31
  -9   1   3 13636.4 217.524   7
  -3   1   9 14568.6 188.738  20
  -3   1  -9 16796.3 228.094   1
  -3  -1   9 14416.5 187.678  37
   3   9  -1 14825.4 264.581  12
   3  -9  -1 15853.8 203.202   3
   9  -1  -3 14814.5 279.065  19
  -3   9  -1 15227.0 223.222  40
  -9  -3   1 17392.5 219.641  42
   1  -9  -3 15630.5 186.841  31
   1   9   3 13386.9 193.337  23
  -9   3   3 1359.78 71.0560   7
   9   3   3 1845.36 118.649  19
  -3  -9   3 1854.88 82.1671   3
   3  -9   3 2014.93 68.4633  36
  -3  -9   3 2183.34 97.9922  18
   3  -9  -3 2007.55 96.9315  14
   3  -3   9 2326.04 80.3360  24
   9   3   3 1333.65 106.831  12
  -3  -3   9 1940.45 64.8005  21
  -3   9   3 1870.80 79.2241  29
   3  -9   3 1942.18 71.3986  27
   3   9   3 1986.04 86.5449  29
   3   9  -3 1903.56 88.8780  29
   9  -3   3 1973.00 75.5035  33
   3   3  -9 1858.69 82.4569  29
   3  -9  -3 1718.30 82.4922   4
  -9   3  -3 2309.99 89.2558  17
  -9   3   3 1652.70 67.7029  44
  -9  -3   3 2389.14 85.9176   7
   3   9  -3 2161.35 88.1550   9
  -9   3   3 1595.10 78.0295  17
  -9   3  -3 1746.87 83.2484  20
  -3  -9  -3 2342.91 99.9556  11
   3  -3  -9 1676.94 73.8869   4
   3  -3   9 1325.22 84.9300   6
   3   9  -3 1949.09 79.6540  28
  -3   9   3 2124.04 91.2631  17
  -9   3  -3 2004.79 71.1590   2
   9   3  -3 1993.29 81.5627  23
  -3   3  -9 1825.45 71.9002  28
   3   9   3 1936.12 68.8594  22
   3  -9   3 1742.92 80.2930   4
  -3   9   3 1807.09 74.0758  44
   3   9   3 1979.15 89.2549  17
  -3  -9   3 2134.33 96.8930  11
  -3   3   9 1643.01 119.387  18
   3   9  -3 2040.94 86.4121  25
   3   3   9 1527.97 85.1293   6
  -3   3   9 1821.52 66.6866  39
  -3  -3  -9 1592.76 69.8794  10
   9  -3   3 2172.46 87.8687  24
  -9   3  -3 1846.16 76.4748  44
   3  -9  -3 1973.62 96.6674  16
  -3  -3   9 1845.77 62.7764  26
  -3  -9   3 2188.11 73.7418  36
  -9   3   3 2288.15 81.9240  26
  -3   3   9 1862.44 65.6906  24
   9   3   3 1552.26 68.7732  23
  -9   3  -3 2007.13 86.6578  26
  -3   3   9 1688.40 120.681  11
  -3  -3   9 1309.89 78.1119   3
   3  -3   9 1586.55 85.0902  16
  -9   3   3 2094.81 74.0385  42
   3   9   3 1888.03 88.3583  25
  -3  -3   9 1650.02 80.2711  16
   3  -3   9 1577.52 84.3550  14
  -3  -3   9 2028.67 67.1755  35
   3   3  -9 2271.88 89.1602   1
   3   3  -9 1789.81 80.9377  25
   3   9   3 1424.11 68.0763   5
  -3   9   3 1916.31 78.5430  28
   9  -3   3 2083.30 108.013  15
  -9  -3  -3 1818.72 71.3725  44
  -3   9  -3 2054.95 83.2248  40
   3  -3   9 1891.05 81.8134  15
   3   3   9 2066.53 74.7760  24
  -3   3   9 1813.19 65.5811  35
  -3   9   3 1841.16 85.5971  43
  -3  -9  -3 1898.50 65.7183  38
   9  -3   3 1920.44 75.6058  38
   9   3  -3 2314.65 85.3478   9
  -3   3   9 2412.51 75.0381  23
   3   9   3 1807.15 99.5976  12
   3   3  -9 2050.85 76.5724   9
   3   9   3 1907.94 70.6804  28
   3   3   9 1916.70 72.0017  30
  -3  -3   9 1591.72 78.5408  14
  -3   9   3 1931.76 83.7268  40
  -3   3   9 1825.35 68.0001  32
  -3   9  -3 2175.93 86.0422  28
   3   3  -9 2480.76 97.5689  19
   9   3   3 1592.09 65.2252  41
   3  -3   9 1700.24 57.4672  35
  -3   9  -3 2071.71 83.3741  39
  -3  -3   9 1805.91 64.3633  42
   3   9  -3 2190.94 72.9387  30
  -9  -3   3 1937.64 75.3503  37
   9  -3  -3 1928.60 83.1340  33
  -3   9   3 1828.48 72.6448  30
   3  -9  -3 1837.46 70.2501   3
  -3  -3   9 1925.44 81.2783  13
  -3  -3   9 1962.71 70.6808  20
   3   9   3 1846.74 106.381  43
   3  -3   9 1789.19 80.3843  37
  -3  -9   3 2137.92 67.1726  38
  -3   3   9 1784.82 60.6396  20
  -3   3  -9 2201.64 86.4036   1
   3  -9   3 2001.92 69.8963  38
   3   9  -3 2741.69 97.9020  40
  -3   9  -3 1799.47 89.3804  12
   9  -3   3 1948.79 75.7653  22
  -9  -3  -3 1684.31 84.3041  37
  -3   9  -3 1758.82 76.1619  44
   3   9  -3 1693.31 87.0908   2
  -9  -3  -3 1972.92 87.3282  20
   9   3  -3 1768.83 78.4841  25
   9   3   3 2128.98 75.2953  22
  -3  -3   9 1948.39 63.8848   8
  -3   3  -9 2298.05 85.1155   2
  -9   3   3 2337.77 82.8514  21
   9   3   3 1627.02 71.5804  33
  -3  -3   9 1558.57 98.0865  11
   3  -3   9 1567.20 78.0612  13
  -9  -3   3 1765.72 63.2746  44
  -3  -3   9 1846.25 70.0689  37
   9  -3  -3 1730.87 78.6840  34
   3  -3  -9 2116.93 82.0234   9
  -9  -3   3 2270.25 81.0104  20
  -9   3   3 2082.16 75.1725  20
   9   3  -3 2158.77 94.1663  34
  -9  -3   3 1967.15 72.2099  42
  -9  -3   3 1977.59 66.1511  36
  -3   9   3 2637.82 74.6170  32
  -3   3   9 1690.86 62.8158  21
   9   3   3 1892.38 82.4250  34
  -3   9   3 2064.64 73.5953  39
   3   9  -3 1987.29 103.352  12
  -3  -9  -3 2254.86 76.2326   7
   3  -9  -3 2054.64 68.2913  31
  -3  -3   9 1600.15 97.8558  18
   3  -9   3 1998.65 92.6855  13
   9   3  -3 2137.51 82.1926  41
   9  -3   3 1886.00 119.884  19
  -9   3  -3 1937.11 83.8900  21
   3  -9   3 2173.00 77.6076  24
   3  -3   9 1774.82 75.4540  36
  -3   3   9 1716.56 62.5077  26
   3  -9  -3 1932.64 67.2636  33
   3  -9   3 2077.85 99.2186  14
  -3   9  -3 1698.53 80.3465   2
   9  -3  -3 1975.35 79.3420   9
  -3  -9  -3 1949.66 85.4810   3
  -9  -3  -3 1872.86 75.7401   7
   3  -3   9 1897.85 66.3973  32
   3  -3   9 1627.49 70.3577   8
   3  -9   3 2107.90 99.5681  16
   9  -3   3 1839.83 73.5459  31
   9   3   3 2038.65 74.8194  31
  -3   9   3 1708.06 64.4482  23
   3   9  -3 1559.45 96.4257  43
  -3  -9  -3 2322.62 99.6273  18
   3   9   3 1778.34 71.4923  23
   3  -3  -9 2249.45 84.7505  34
   3  -9   3 2148.83 67.3807  31
  -3   3  -9 2642.67 98.6481  12
   5   9  -1 15866.7 290.332  12
  -9  -5   1 18338.7 236.340   7
  -1  -9   5 18982.7 264.189  18
   9  -1  -5 13161.3 248.395   1
   9  -1   5 17289.3 222.236  30
   5  -1   9 16964.3 225.141  30
  -1  -5   9 14783.9 265.983  11
   9   5  -1 12446.4 265.317  12
  -5  -1   9 8936.52 237.537  18
   9   5   1 11218.3 267.657  12
   5   1   9 16619.0 218.789  32
  -1  -5   9 15542.0 213.682  42
  -9  -5  -1 17293.3 249.163  37
   1   9   5 14491.7 191.070  22
  -5  -9  -1 14225.2 229.133   3
   1  -5   9 14434.0 240.623  13
   1   9  -5 18990.6 261.060  29
   5   9   1 16280.0 211.411  30
   1  -9  -5 18500.8 268.974  14
   1   9   5 15886.2 227.582  30
   1   9   5 14894.1 216.924  23
   1   9   5 16539.5 252.865  29
  -9  -5  -1 14708.8 217.622  36
  -9  -1   5 13308.2 213.558   7
   1  -5  -9 15367.9 226.104   4
  -5  -9   1 17490.2 263.583  11
  -1   9  -5 17099.3 248.598  40
   5   9   1 15787.4 247.012  29
   5   9  -1 15394.6 245.775  29
  -1   9  -5 17454.7 239.467  29
  -1  -9   5 18728.2 237.807  36
  -1   5  -9 17174.3 232.041  29
  -9   1  -5 20171.5 256.810  17
   5  -1   9 13339.9 200.552  38
   5   1  -9 14414.1 237.322  29
  -1   9   5 16728.6 199.940  39
   9  -1  -5 14659.2 237.009  41
   9  -1   5 17859.6 261.902  24
   1  -5   9 20906.8 223.963  24
  -9   5  -1 18299.2 278.876  17
   9  -5  -1 15660.9 220.807  41
  -5  -1   9 17084.5 196.870  42
   1   9   5 16340.9 220.926  28
  -1   9  -5 18584.4 246.424  39
   5  -1   9 16877.8 219.121  32
  -5   9  -1 17199.9 262.191  17
  -5   9   1 15638.0 257.594  17
  -5   9  -1 14621.0 219.476  28
  -5  -9   1 16174.7 246.950   3
   9   1  -5 17545.9 262.817  34
  -1  -9   5 16734.8 235.300   3
   1  -9   5 13683.2 197.452  42
   1   9  -5 17619.0 250.515  28
  -5  -9  -1 16326.9 263.338  11
  -1   5  -9 16084.3 234.430  28
  -1   9   5 16954.0 206.728  35
  -1   9  -5 15737.3 239.677  28
   9   1   5 17105.7 238.203  22
   1   9   5 13715.8 242.388  17
   5  -9  -1 14738.2 208.056  41
   1   5   9 16282.5 233.628  17
   9  -5   1 17358.9 247.558  27
   1  -9   5 17661.9 275.084  14
  -1  -9   5 19219.6 266.420  11
   5  -9   1 15600.1 217.387  27
   5   9  -1 13066.1 249.407   2
   9  -5  -1 16963.5 226.578   9
  -1  -9   5 17625.7 218.666  27
  -9   5  -1 14934.2 220.916  26
  -5   9  -1 15450.7 229.800  40
  -5  -9  -1 16478.6 202.834  27
   1  -9  -5 18609.4 270.117  16
   1   5   9 14395.7 259.636   6
  -5  -1   9 17278.2 212.773  21
  -9  -5   1 15756.6 207.175  44
  -1   5   9 13930.7 241.663   6
  -1  -9  -5 14255.0 186.817  31
  -9   1   5 10174.8 196.369   7
  -1   5   9 11289.2 166.750  26
   9   1   5 13724.0 202.780  33
  -5  -1   9 17039.3 209.877  26
   5   9   1 18033.0 226.216  22
  -5   1   9 16461.5 209.227  26
   5   1  -9 19162.0 269.091   1
  -5  -1   9 9279.28 242.507  11
  -9  -1   5 17360.9 205.720  26
  -9   1   5 18134.4 220.244  26
  -1   5   9 13784.9 194.645  39
  -1  -5  -9 16513.5 224.456   4
   9   5  -1 12257.6 258.707   1
  -5   1   9 11629.6 294.568  11
  -1  -5   9 12809.9 226.961   3
   9   1  -5 13396.5 267.670  19
  -1  -9   5 19267.4 271.860  16
   5  -9  -1 18118.4 215.763  31
   5   1   9 17011.6 229.478  30
  -5   9   1 11258.0 216.706   5
  -5   1  -9 18608.5 253.219   1
   1  -5   9 15781.2 231.647  37
   1  -5   9 13894.5 254.648  16
   9   5  -1 18340.6 231.813   9
  -1  -5   9 15153.6 252.318  16
   5  -9   1 17328.0 217.699  38
  -9   5   1 17091.1 227.707  20
  -5   9  -1 15523.7 230.914  39
   9  -1   5 16771.0 237.789  38
  -5   1   9 17116.3 215.166  35
   5   9  -1 17614.6 267.255  25
   9   5   1 14975.4 225.082  25
   9   5  -1 14677.0 228.955  25
  -5   1   9 15403.7 215.578   7
  -9   1   5 18709.0 224.612  21
  -5   9  -1 14658.1 233.827  44
   9   1  -5 17145.5 241.720  25
   9  -1  -5 15864.6 226.986  25
   9   5   1 17346.7 248.517  23
   5   1  -9 15255.9 247.246  25
  -1   9   5 15192.1 246.421   5
   5  -1  -9 16614.4 260.350  25
  -1   9  -5 13291.8 236.994   2
   9  -5  -1 11872.2 268.284  15
  -1   5   9 14422.9 186.305  35
   1   9   5 12121.7 220.651   5
   5   9   1 13785.8 281.063  43
   9  -5   1 14398.2 288.738  15
  -5   1   9 16623.7 206.689  39
   5  -1  -9 17407.0 256.989   9
  -1   5   9 16009.7 217.100  24
   1   5   9 16989.9 226.192  24
  -5   9   1 14429.0 225.507  44
   5   1  -9 16165.5 223.512   4
  -1  -9   5 13347.8 193.479  35
   1   5  -9 17755.1 251.416  29
   1  -5   9 15007.8 217.467  42
   9   1   5 21049.4 313.820  15
   5   1   9 16937.0 229.969  24
   5  -1   9 18117.3 256.515  24
   1   9   5 15462.9 285.654  43
  -1  -5   9 15264.1 209.342  20
   1  -9   5 18031.0 279.752  16
  -5  -9   1 17244.0 208.419  38
  -1  -5   9 15026.1 250.050  14
  -9   5  -1 14926.8 221.628  21
  -9  -1  -5 16329.6 228.857   2
  -5  -1  -9 13773.4 219.691  10
   5  -1   9 13316.9 214.996   8
  -1   9   5 15372.7 269.661  43
  -5   1   9 18323.0 217.524  32
   1  -9   5 18127.1 261.978  13
  -9   5   1 14117.3 223.547  44
   9   1  -5 15441.3 238.933   9
   1  -5   9 16596.2 231.556   8
   1   9  -5 17332.0 238.063   9
   9   5   1 16686.7 233.289  41
  -5  -1  -9 16737.3 227.768   1
   1  -5   9 13946.2 255.608   6
  -1  -9   5 14560.6 198.429  42
  -5  -1   9 15451.1 242.676  13
   1   5   9 16381.2 213.233  23
  -1  -5  -9 18479.0 246.849   3
   5   1   9 14310.2 252.862  15
  -5   9   1 15881.6 239.052  40
  -9   5   1 14701.8 239.942   7
  -9   1  -5 17067.0 234.317  44
   9   1  -5 15829.5 243.639  41
   5   9   1 16579.6 231.344  23
   9   1   5 13943.7 189.054  23
   5   9   1 13708.4 233.310  34
   1   9  -5 18654.2 262.378  40
   5   1   9 15611.6 206.186  22
   5  -1   9 12710.6 190.267  22
   9   5   1 14497.6 276.863   1
   5   1  -9 15291.2 234.302   9
  -5  -9   1 17431.2 263.401  18
  -1  -9   5 18722.3 268.603  14
  -1   5  -9 14435.6 207.260  40
   9  -1  -5 17157.9 254.089   9
  -5  -9   1 17418.4 213.100  27
   9  -1   5 20856.7 319.041  15
  -1   5   9 17428.5 264.847  13
   5   9  -1 18375.3 223.912  22
  -5   1   9 11610.9 292.254  18
  -5   9   1 16819.0 236.991  39
   1  -9   5 14673.6 231.313   4
   9   5   1 19519.4 231.813  22
   1  -9  -5 16839.5 231.728   3
   9   5  -1 19179.8 249.463  41
   5  -9   1 14898.7 193.137  41
   9  -1   5 15315.0 205.369  33
   1  -5   9 13834.2 252.109  14
   5   9   1 15599.9 256.645  25
   9   5  -1 18648.3 255.223  23
   9   1  -5 11597.2 234.693   1
  -9   1   5 19379.0 238.550  20
  -5  -1   9 17223.7 209.493  35
   1  -9   5 17482.6 215.075  38
   9  -5   1 16849.4 231.348  22
   5  -9  -1 19505.4 221.115  33
  -1  -9   5 19298.9 215.661  38
   5   9  -1 19315.3 264.534   9
   5  -1   9 15987.3 262.517  15
   5   1   9 15626.4 230.931   8
  -1  -9   5 15600.7 225.867   4
  -9   1  -5 14536.7 219.051  21
  -1   9   5 15296.8 217.205  23
   9  -5   1 17256.5 251.419  24
   5  -9   1 18571.5 220.816  31
  -5   1   9 16666.3 211.778  21
  -9  -1   5 17575.6 208.657  21
  -5  -1   9 16075.6 199.886  37
  -9  -5   1 17506.7 213.105  42
  -1   9   5 16421.2 248.992  29
   9   1   5 16532.5 212.500  30
   9  -1  -5 14961.0 228.494  33
  -9  -5   1 17454.5 247.692  37
  -1  -5   9 16002.1 245.735  13
   9  -1   5 14689.1 323.133  19
  -1   9   5 17483.4 235.490  28
  -5   1   9 16817.3 209.829  20
   1  -9   5 16894.9 224.248  36
  -9  -1   5 18753.0 241.194  20
  -9  -5   1 16428.8 222.083  36
   9  -1  -5 13834.1 261.774  19
  -5   1   9 14856.1 249.891  13
   9   5  -1 19452.9 241.447  33
  -9   5  -1 15465.3 223.604  20
   1  -9   5 16701.8 217.708  27
   1  -5   9 14738.2 219.278  36
  -9  -1  -5 16505.0 227.936  44
  -1  -5   9 15028.5 209.376  36
  -1   5   9 11425.6 168.512  21
   9  -1   5 15462.6 227.867  22
  -9   1  -5 14928.9 223.799  26
  -9  -1  -5 16818.4 236.753  17
   5  -1   9 12543.1 219.671  13
  -9   1   5 17930.7 214.654  42
   1  -5   9 14421.4 205.821  20
  -5   9  -1 13724.7 226.238  12
   9  -1   5 19502.1 237.028  32
   1   5   9 17705.1 222.931   8
  -1  -5   9 16988.5 224.220   8
   1   9   5 16687.5 227.009  40
  -1   5  -9 16633.4 255.476   1
  -9   5  -1 15376.5 212.563  39
   9   1   5 18878.7 226.978  32
  -1  -5   9 16251.3 204.259  35
   5  -1  -9 14326.3 215.437   4
   9   5  -1 16931.2 260.790  34
  -1   5   9 17848.2 206.383   8
   5  -1   9 12120.6 227.998  14
  -9   5   1 17427.3 227.203  39
   5  -1  -9 19001.1 261.678  34
   5  -1   9 11919.2 228.337  16
  -9   1  -5 12905.3 227.587  20
   1  -5   9 14950.2 196.206  35
   9   5   1 18187.7 240.087  33
  -9  -1   5 18942.0 229.675  42
  -5  -9  -1 16825.8 219.429   7
  -9   5   1 14297.6 209.502  42
   9  -5   1 15529.5 224.356  33
  -5  -9  -1 16601.8 216.968  36
   9  -5  -1 16057.7 233.386  33
  -5  -9   1 17207.4 210.050   7
   5   1  -9 19993.6 274.151  19
   5   9  -1 14240.4 284.701  43
  -5   9  -1 12176.4 203.766   2
   5   9  -1 19297.4 216.556  30
  -1   9   5 16758.7 237.893  40
  -1   5   9 19232.8 226.436  23
   9   5  -1 13132.6 293.509  19
   9   5   1 14112.3 297.888  19
   1   5   9 14754.5 206.625  32
   1   5   9 18097.0 253.619  13
  -9  -1  -5 13144.2 231.589  20
  -1   9   5 17143.7 230.759  30
   9   1   5 15876.0 328.280  19
   1   5  -9 16455.4 231.519  40
  -5  -9   1 17448.2 218.266  36
  -1   9  -5 15478.5 269.916  12
  -9  -1   5 17302.1 209.243  37
   1   9  -5 15317.4 271.333  12
   1  -9  -5 15683.1 231.542   4
   9  -1   5 12505.9 206.795  31
  -1  -9  -5 16531.3 233.600   3
  -5   1  -9 19482.7 254.014   2
   9  -5   1 16584.3 227.791  31
   9  -5  -1 16184.3 221.589  31
  -5   9   1 15745.4 225.320  28
   1   9  -5 13375.8 236.338   2
  -5  -9  -1 16427.6 260.846  18
  -1  -5   9 14273.2 259.960  18
  -1  -5   9 15489.4 221.008  37
   1  -9  -5 15209.3 193.558  31
   9  -5  -3 2619.22 97.4814  41
  -5  -9   3 3036.13 120.214  18
   3  -5   9 3556.34 94.2818  38
  -9   5   3 2187.19 97.9618   7
   9   3   5 2719.48 85.5975  30
   3   9   5 2800.57 133.531  12
   9  -5   3 2809.84 95.5923  38
   5   3  -9 3309.46 118.808   1
  -5  -9  -3 2631.47 102.451   3
   9   3   5 2485.04 85.5190  23
   5   9   3 2689.15 89.7680  30
   3   9   5 2479.67 91.7841  30
  -9   3  -5 2816.56 96.7126  44
   5  -3   9 2174.64 102.349  14
   9  -5  -3 2918.74 99.8522   9
  -5   3   9 1921.47 136.540  18
  -3   5   9 3161.74 95.8248  23
   9   5   3 1774.55 127.378  12
  -9   5  -3 2652.63 96.0795  44
   3   9  -5 2493.16 107.812   2
  -3  -5  -9 2362.00 87.5089  10
   3   9   5 2756.69 108.130  29
   5   9   3 2763.02 107.579  29
   9  -3  -5 2802.66 106.099   9
   5   9  -3 2893.40 112.612  29
   3  -9   5 2417.03 118.625   6
   3   9  -5 3054.67 115.082  29
   5   9   3 2263.11 132.651  12
  -5   9   3 2808.79 102.433  40
   3  -9   5 3195.26 123.933  14
   5   3  -9 2757.92 107.226  29
  -3   9   5 3012.65 87.0963  32
  -5   3   9 2626.77 84.8162  39
  -3  -9   5 2835.11 103.686   3
  -9   5  -3 4213.88 132.971  17
  -3  -5   9 2735.38 86.4747  42
  -5  -9   3 2630.80 102.828   3
   9   3  -5 2209.35 109.039   1
  -5  -3   9 2924.78 80.8951  26
  -9   5   3 1948.55 93.8175  17
  -9   3   5 2103.41 86.5510  17
  -3   9   5 2909.62 97.0099  28
  -5   9   3 2781.43 96.2149  28
  -9  -5   3 3151.38 100.063  37
  -9   5  -3 2550.47 101.868  21
  -3  -9   5 3270.94 83.7293  38
  -5   9   3 2573.24 109.364  17
  -5   9  -3 2637.56 96.7228  28
   3   9  -5 3031.30 104.035  28
   5   9  -3 2969.14 116.069  25
   3  -5   9 2205.00 110.139   6
  -3   9   5 3000.32 114.683  17
   3  -5  -9 2262.81 89.8781   4
   3  -5   9 2585.47 97.2244  36
  -3   5  -9 2398.95 89.7871  28
   5  -3  -9 3095.88 110.793   9
   5   9  -3 2454.89 108.700   2
  -9  -5   3 2707.16 87.9880  42
   9  -5   3 3455.56 117.494  24
   3   9   5 2374.12 103.557  17
  -3   9  -5 2906.63 108.953  39
   9  -5   3 2741.35 99.9523  27
  -3   9  -5 2822.73 103.281  28
   5  -9  -3 2612.15 117.325  14
   9   5   3 3121.83 96.0454  22
   3  -5   9 2531.16 113.736  16
  -3  -9   5 3227.79 121.099  11
  -9  -3   5 2770.00 93.3998   7
   3  -5   9 3478.30 100.499  24
   3  -9   5 2641.86 89.2691  36
   5   3   9 2175.63 107.048   6
  -3   5  -9 3116.15 114.856  12
  -5  -9  -3 2546.87 77.2620  27
   5  -9   3 2922.93 102.676  24
  -3   5   9 2242.86 72.2411  26
  -5  -3   9 2001.32 114.435  11
  -5   3   9 2716.35 84.6522  26
  -9   3   5 3167.68 93.6238  26
   9   5   3 2387.82 86.5046  41
  -5  -3   9 2933.58 89.9714  20
   3   5  -9 2993.81 103.307  40
  -5  -3   9 1654.38 94.6456   3
  -9   3  -5 2507.79 100.082  26
  -3  -9   5 2795.72 80.9904  42
   3   9   5 2883.93 114.148  25
  -3  -5   9 2614.10 103.650  16
   5   9   3 2661.14 112.860  25
  -5  -3   9 2837.52 98.8821  13
   5  -3  -9 2156.88 86.8901   4
  -3  -5   9 2952.81 84.7509   8
  -3   9   5 2980.44 106.353   5
   9   3  -5 2611.64 103.722  25
  -9   5  -3 2758.43 86.9368   2
   5   3  -9 2826.82 110.841  25
   9   5  -3 3275.77 104.324  23
  -5  -9   3 3220.33 85.9351  38
   9   5  -3 3262.48 103.960  41
  -5   3   9 2709.58 88.6026  32
  -5   9   3 2468.33 90.7323  44
   9  -5   3 2722.09 127.325  15
   9   3  -5 3204.98 108.343   9
   9   3  -5 3001.99 112.820  34
   3   9   5 1713.16 82.8587   5
   3   5   9 3068.21 96.9502  24
  -5   9  -3 3476.02 109.519  21
   5  -3  -9 3277.53 111.719  34
  -9   3   5 3007.47 83.2565  42
   9  -5  -3 2890.33 102.047  33
  -9  -3   5 2997.06 93.0900  37
   5  -9  -3 2725.04 119.530  16
   9   3   5 3418.96 123.858  15
   5   9   3 1872.72 116.514  43
   5  -3   9 2918.62 111.576  15
  -9   3   5 3148.75 94.1075  21
  -5   3  -9 3241.81 105.911   2
   9   5   3 2542.79 135.656  19
  -9  -5  -3 2423.26 83.1914  44
  -3   5  -9 2911.57 106.601   1
   5   3   9 1923.89 98.1413  15
  -3  -9  -5 2845.11 91.3685   7
   5  -3   9 2198.13 95.5116  13
   5  -3   9 2548.29 82.0319  32
   5   3   9 2866.37 94.3496  24
  -3   9   5 2621.90 86.9063  23
  -5   9   3 2766.84 85.2480  23
  -5  -9  -3 2925.38 117.439  11
  -3  -9   5 3042.83 87.5147  37
  -9   3  -5 2883.03 92.6627   2
   9  -3   5 2707.91 94.7822  22
   5  -9  -3 2619.01 76.9233  34
  -5  -9  -3 2987.05 118.518  18
   3   5  -9 3068.66 112.061  29
   3   9   5 2641.29 93.8341  23
  -3   9   5 2692.34 99.7269  29
   9   5  -3 4127.17 118.533   9
   3  -9  -5 2751.95 101.166   4
  -9   3   5 2890.37 87.8850  35
  -3  -5   9 2418.33 119.544  11
   3  -5   9 2494.90 96.4868  37
   3  -9   5 2391.56 97.5685   4
  -5   9  -3 2679.95 98.3815  44
   3   9  -5 3114.70 111.977  40
   9   3  -5 2933.57 98.8990  23
   5   3   9 2710.45 81.8440  22
  -5  -9   3 3174.68 93.5245  36
   5   9   3 2827.93 97.3508  23
  -5  -9   3 3018.28 88.5200  37
   9  -3   5 3592.46 115.154  24
  -5   9   3 3023.96 95.7271  39
   9   5  -3 2093.90 123.237  19
   5   3   9 2780.57 94.3006   8
  -9  -5  -3 2577.75 101.252  37
  -5   3   9 2618.26 108.116  13
   9   5  -3 2028.44 113.746   1
   3   9   5 2614.63 83.0366  22
   3  -5   9 2416.46 78.7130  35
   5  -3   9 2411.58 96.4126  36
  -5  -3   9 2863.89 84.2898  42
  -9  -5   3 2880.24 81.8127  44
  -5  -3   9 3053.11 90.5040  37
   3   5   9 2550.36 82.3071  32
   9   3   5 3005.52 95.5298  22
   3   5   9 2434.67 114.134   6
  -9   5   3 2205.98 82.7152  44
   3   5   9 3073.56 96.9578   8
   5   9   3 3009.74 91.8239  22
   3  -9   5 3018.60 122.074  16
   9   3  -5 3075.70 101.947  41
  -9   5   3 2913.17 88.8545  39
  -9   3   5 3127.56 92.9929  20
  -9   3  -5 2428.92 97.6434  21
   3  -9   5 2941.36 91.6675  38
   5  -9  -3 2519.65 91.4451  41
   3  -9  -5 1773.10 85.1362   9
   9   5   3 2478.37 94.7676  23
   5   3   9 2849.58 94.1899  30
  -5  -9  -3 2880.36 91.6212   7
  -3  -5   9 2626.06 102.988  14
  -9   5  -3 2969.42 97.6942  12
  -5   3   9 2788.99 86.4472  21
  -5  -3   9 3007.15 82.8512  21
  -3   5   9 2210.45 72.6434  21
   9  -3   5 2651.04 96.5911  38
   9  -5   3 2765.69 97.5835  22
   9  -3  -5 2543.27 100.742  34
   9  -5  -3 2510.94 90.4670  34
   3  -9  -5 2241.03 84.2319   3
  -3  -9   5 3128.64 89.1569  27
   5  -3   9 2204.46 77.5759  22
  -3  -9   5 3268.49 121.878  18
  -3   9   5 3015.28 92.6983  44
  -3   5  -9 2686.61 98.5131   2
   9   5  -3 3344.38 119.427  34
   3  -9  -5 3076.32 121.947  14
  -3   9   5 2735.61 89.0166  35
   3  -9   5 2864.58 114.201  13
  -5  -9  -3 2642.91 84.1348  36
   3   9  -5 3123.19 107.199   9
   5  -3   9 2155.64 103.310  16
  -5   3   9 1956.68 137.159  11
  -5   9  -3 2671.21 102.964  39
  -3   5   9 2371.98 78.2090  35
  -3  -5   9 2796.71 98.3487  13
  -3  -9  -5 2360.17 76.3865  38
  -9   3  -5 3483.85 108.927  17
  -3  -5   9 2839.54 82.9706  35
   3  -5   9 2507.25 93.2926   8
   9   3   5 2826.21 86.9286  32
  -3  -5   9 2836.24 88.0040  20
   9  -3   5 3386.62 135.717  15
  -5   3   9 2601.43 84.8933  35
   3  -9  -5 3160.01 123.556  16
  -5   9  -3 2345.87 90.5820  40
  -9   5  -3 2226.46 83.6646  39
  -5  -9  -3 2394.56 79.5835  38
   3  -5   9 2478.88 111.698  14
  -9  -3   5 3167.29 99.9647  20
  -9  -5   3 3118.78 94.8328  20
   5  -3   9 2303.50 88.4746   8
  -5   3  -9 3771.83 123.290  12
   9   3   5 2764.33 98.4692  34
   9   5   3 2603.11 107.805  34
   3  -9   5 2719.58 92.5066   8
  -3   5   9 2954.90 116.928  13
   3   5   9 2721.90 92.1218  30
   5  -9   3 2842.36 94.7358  27
  -9   5  -3 2330.44 95.8616  20
   3  -5  -9 2508.81 95.7656  34
   3  -9  -5 2763.41 81.5702  31
   5   9  -3 3368.23 109.985  40
  -5   9  -3 2257.20 91.7037   2
   5  -3   9 2280.10 81.9988  38
  -5  -3   9 3069.19 86.7687  35
   9   5  -3 2697.13 104.015  25
   9   5   3 2606.55 92.9845  33
   9   3   5 2237.49 84.4013  33
  -5  -3   9 1935.25 112.433  18
  -9   5   3 2768.47 90.5382  35
  -5   3  -9 3724.08 117.323   1
   9  -5   3 2751.30 90.3856  33
  -5   9  -3 2366.41 98.1545  12
   9  -3   5 2804.48 95.9211  31
   9  -3  -5 2441.67 97.1732  33
   9  -3  -5 2637.56 104.175  41
  -3  -5   9 2163.05 100.420   3
   5  -9  -3 3294.38 94.3015  33
  -3  -5   9 2569.97 80.8739  36
  -5   3   9 2780.45 79.2205  20
   3  -9   5 3362.31 95.6623  24
  -5   9  -3 3474.41 111.029  26
   9   3  -5 2490.70 127.956  19
  -9  -5  -3 2645.16 91.6378   7
  -5   9   3 2507.61 97.9414   5
   3   5   9 2591.43 82.3560  23
  -9  -3  -5 2632.12 89.3917   7
   5   9   3 2491.31 106.364  34
   3   5  -9 2921.33 101.521  28
  -5  -3  -9 2197.33 86.3763  10
   5   3  -9 3312.47 121.637  19
  -3  -9   5 3129.36 95.7859  36
   5   3   9 2677.28 87.1020  32
   9   3   5 2642.28 139.380  19
  -3   5   9 2175.24 81.1392  32
   9  -3   5 2578.42 146.016  19
  -9  -5   3 3148.19 95.6902   7
  -5   9   3 3038.84 93.3358  32
  -9   3   5 2750.57 89.6238  32
  -9   5  -3 2538.06 103.747  26
  -9  -5   3 2910.53 89.2270  36
  -5  -9   3 3040.14 120.687  11
  -3  -5   9 2525.18 120.647  18
   3   9  -5 2724.66 117.619  12
  -9   5   3 2930.64 86.8530  20
   5  -9   3 2841.54 86.0298  31
  -3  -9  -5 3648.01 118.059   3
   5   3  -9 2934.09 101.580   9
   5  -9  -3 2921.09 85.5525  31
  -3   9   5 3047.20 92.1621  39
   5  -9   3 2711.24 89.1938  38
  -9  -3  -5 2627.92 87.9009  44
   5   9  -3 2988.77 129.760  12
  -3   9  -5 2668.83 98.2262  40
  -9   5   5 2473.14 111.749   7
  -9  -5   5 4877.47 163.466  18
   5   5   9 4067.14 120.698  30
   9   5  -5 4730.96 137.627   9
   5  -9  -5 3339.75 118.975   9
   5  -9   5 4773.09 135.563  24
  -5   5   9 3009.73 180.391  18
   9   5   5 2440.20 167.293  12
   5  -5   9 3938.22 135.554  13
   5   9   5 3843.09 128.537  29
   5  -9  -5 4645.03 152.984  14
   9  -5   5 3949.37 125.464  22
  -5   9   5 4096.96 127.735  40
   5  -5   9 5369.70 140.084  24
   5  -9   5 3488.18 151.144   6
   5   5  -9 4051.63 135.729  29
   9  -5   5 3799.18 172.925  19
  -9   5  -5 3409.92 121.736  21
  -9   5  -5 4767.26 143.517  17
  -5   9   5 3959.08 116.911  28
  -9   5   5 2837.31 109.978  17
  -5  -9  -5 4695.25 147.398  11
  -9  -5   5 4090.33 110.312  20
  -5   9   5 4091.23 140.949  17
   5  -5   9 3420.48 107.511   8
   5   5  -9 4068.15 120.336  28
   5  -5   9 4153.25 113.944  22
   9  -5   5 4007.36 122.678  38
   5   9  -5 4306.98 159.537  12
   5   9  -5 4105.93 138.410  29
   9  -5   5 3890.18 124.239  27
   5  -5   9 3938.98 109.474  27
   5  -9  -5 4032.15 126.458   4
   5  -5   9 3984.23 146.090  14
  -9  -5   5 3944.78 129.594   3
  -5  -9   5 4301.20 106.755  27
   5  -5   9 4328.35 152.809  16
  -9  -5   5 4980.91 166.764  11
  -5   9  -5 3885.59 123.357  44
  -5  -5   9 4310.27 111.930  20
  -5   5   9 4034.61 107.139  26
  -5   5  -9 4913.26 140.196   1
   5  -9   5 4305.22 158.727  16
   9  -5  -5 4136.44 125.821  33
  -9   5  -5 3626.90 126.234  26
  -5   9  -5 4283.11 131.721  26
   9   5   5 3612.70 114.721  23
  -5   5   9 4053.38 116.489  32
  -5   9  -5 3889.52 124.699  28
  -5   5   9 3005.66 180.894  11
   5   9   5 3651.60 136.950  25
  -5   9   5 3944.73 114.466  35
   5   9  -5 4600.63 144.883  25
   5  -9   5 3838.53 117.962  22
  -5   9   5 3815.82 122.958   5
   9   5  -5 3965.06 136.050  25
  -5  -9   5 4042.03 101.643  42
   5   5   9 4169.45 119.247  24
  -5  -9  -5 4180.16 115.083   7
  -5  -5  -9 2911.57 102.832  10
  -5   9   5 4135.15 114.571  23
   5   5   9 3798.79 103.376  22
   9  -5   5 4141.59 159.227  15
  -9  -5  -5 3820.78 108.816  44
  -5   9  -5 3765.47 133.372  12
  -5  -5   9 4058.80 102.828  35
  -5  -5   9 4121.98 110.546  42
   5   5  -9 4108.78 132.322  25
  -5   5   9 4053.12 107.915  21
   5  -5  -9 4391.16 136.489   9
   5   9  -5 4567.68 136.694   9
   9   5  -5 4513.01 125.793  41
  -5   5   9 3817.59 142.633  13
   5  -5   9 3649.57 97.4173  35
   5   5  -9 4414.10 128.057   9
   9  -5  -5 4083.93 130.387  41
   5   9  -5 3709.46 135.520  40
   5   9   5 4797.04 133.654  23
   5  -9  -5 3550.45 117.584  41
   9  -5  -5 4301.44 134.678   9
  -9  -5  -5 3247.08 119.778  37
  -5  -9  -5 4150.65 125.320   3
  -5   5  -9 3538.45 113.685  39
  -9   5  -5 4508.79 133.531  12
  -5   5   9 4172.94 112.413  39
   5   9   5 3481.88 164.872  12
   5   9   5 3814.54 115.714  30
   9   5   5 3726.05 105.518  30
   9  -5  -5 3722.39 119.723  34
  -9   5   5 4130.35 111.501  39
  -5  -5   9 4083.98 115.408  37
  -9   5  -5 3510.08 107.352  39
  -5   9  -5 3679.03 124.573  39
   5   5   9 4893.45 163.246   6
   5  -9   5 4774.00 142.100  38
   5  -5  -9 3587.73 122.739   4
  -5   5   9 3879.55 109.936  35
   9   5  -5 4077.05 138.337  34
   5   5   9 4385.08 125.095   8
   9  -5   5 4706.60 146.187  13
   5  -9   5 4040.65 149.317  13
   5  -9  -5 4678.75 154.284  16
  -9  -5   5 3972.76 99.0317  27
   5  -5   9 3859.99 113.397  38
  -9   5  -5 4150.52 122.038  44
  -5   9  -5 4154.05 128.141  21
  -5  -9   5 4464.91 113.355  37
  -9   5   5 4324.26 117.056  35
  -9  -5   5 4011.44 109.056  42
   9  -5   5 5010.03 145.080  24
   5   9   5 2666.84 141.775  43
  -5  -9   5 4395.76 116.631  36
   9   5   5 3546.22 127.388  34
   9   5   5 4040.25 169.943  19
   5  -5  -9 4430.57 134.505  34
   5  -9  -5 3772.94 104.855  34
  -5   9  -5 3529.56 124.643   2
  -5   9   5 4428.39 119.079  39
   9   5  -5 3203.53 136.089   1
   5   9  -5 3700.36 132.496   2
   5  -9   5 3735.45 117.651  36
  -9  -5  -5 3842.99 114.866   7
   9   5  -5 3463.78 158.208  19
  -5   5  -9 4739.07 148.209  12
  -9   5  -5 4173.23 115.961   2
   5   5   9 3725.05 104.366  32
  -5  -9  -5 3282.96 95.9236  38
   5  -9  -5 3794.77 107.173   3
   5  -9   5 3881.54 118.391  27
  -5   9   5 4555.86 120.146  32
  -9   5   5 3834.20 114.117  32
   9   5   5 4493.77 125.647  22
   9  -5   5 4264.97 119.346  31
   5  -9   5 4288.04 107.166  31
  -5  -9  -5 4515.84 144.911  18
  -5   5  -9 4062.55 125.320   2
   5  -9  -5 4125.37 103.502  31
   5  -9   5 3503.65 124.813   4
   5  -9   5 4306.11 157.028  14
  -7  -9   1 1639.81 98.7338  18
   1  -7   9 1356.63 87.3758  14
  -1   9  -7 1197.52 80.9412   2
  -9  -7  -1 1569.57 75.4232   7
   9  -1   7 1637.06 76.6837  30
  -1  -9   7 1813.87 91.6564  18
   9   1   7 1476.97 71.9240  30
   7   9   1 1329.37 116.001  12
  -1  -9   7 1839.01 79.2742   8
  -7   1   9 1227.82 68.0136   7
   9   7  -1 1289.87 109.453  12
  -7   9   1 2785.40 97.4274  21
  -7  -1   9 915.194 93.1868  18
   7   9   1 1665.19 67.1693  30
   1   9   7 1445.56 75.2486  30
  -7   1   9 1136.52 116.646  18
   7   9  -1 1429.30 85.5370  29
  -1  -9  -7 1475.77 76.8849   3
  -1   7  -9 1513.18 95.5502  12
   7   1  -9 1592.45 90.1722   1
  -9   7   1 1447.67 76.8747  21
   9  -7   1 1551.13 75.3294  22
   1  -7   9 1333.40 71.1483  36
  -1   9  -7 1561.18 86.5979  28
  -9  -1   7 1646.46 66.4321  37
  -7  -9   1 1443.68 64.3811  38
   1  -9  -7 1524.07 80.3702   4
  -1   9   7 1448.47 83.9496  29
  -7  -9  -1 1638.13 85.9838   3
  -9  -1  -7 1551.99 77.6031  17
  -1   7  -9 1365.09 76.0315  29
   1   7  -9 1558.24 84.8852  29
   1  -9   7 1404.71 93.3135   6
   9   7  -1 1643.30 93.7623  34
  -1   7   9 1284.54 75.4920  17
  -9  -7   1 1356.49 60.3745  38
  -7  -9   1 1478.88 82.1231   3
   7   1  -9 1209.00 82.0314  29
   1  -7   9 1292.45 69.6483  42
  -1  -9   7 1357.87 67.6049  42
  -7  -1  -9 1683.82 77.4035   2
   1   9   7 1363.95 69.6052  28
  -9   7  -1 1525.13 90.0420  17
  -1   9   7 1704.90 77.5008  28
  -9   7   1 1207.35 82.8172  17
   7  -9   1 1170.64 77.9394   4
  -7   9  -1 1419.95 86.9362  17
   7  -9   1 1470.75 72.5561  27
  -7   9   1 2265.36 91.0576  28
  -7   9   1 1737.21 113.893  17
   9  -1   7 1245.03 114.716  19
  -9   7  -1 1337.99 76.4757  21
  -9   1   7 1523.61 64.4762  35
  -7   9   1 2534.00 102.931  39
   1   9  -7 1625.70 89.9718  28
   1   7  -9 1569.77 84.9329  28
  -7  -9  -1 1811.08 97.9835  11
  -9  -1  -7 1466.07 73.2530   2
   1   9   7 1141.01 78.4114  17
   7  -1   9 1106.85 86.4470   6
   9   7   1 1593.37 83.3253  23
  -7  -9   1 1717.42 99.9285  11
   9  -1   7 1405.30 87.4369   6
   7   1   9 1146.74 83.4802   6
  -1   7   9 1154.25 58.5035  39
   7   9  -1 1899.26 91.8085   9
   1  -9  -7 1784.55 98.1536  14
  -1  -9   7 1905.44 90.5727   3
   1  -9   7 1502.59 69.9617  27
  -7  -9   1 1575.49 74.0636  36
  -1  -9   7 1607.60 69.0465  27
  -9   1  -7 1235.89 74.1996  21
  -1   7   9 1606.31 91.5401  13
  -1  -9   7 1892.87 93.5479  11
   1   7  -9 1517.83 80.0537  40
   1  -7  -9 1720.83 98.3480  16
  -7  -9   1 1562.28 66.5927  27
  -7  -9  -1 1367.25 63.3594  27
   1   9  -7 1689.46 87.6827  40
   7  -1   9 1610.53 76.8045  30
   7  -9  -1 2794.79 132.032  16
  -7  -1   9 1652.62 68.4334  26
  -9  -1   7 1532.91 64.8179  26
  -1  -7   9 1345.96 78.4161   3
   1   9   7 1459.84 72.7668  40
  -9   1   7 1598.31 69.8345  26
   9  -7   1 1215.58 87.5420  16
  -7  -1   9 918.677 94.6294  11
  -7   9   1 1734.51 87.2089  44
   9   1   7 1367.34 114.604  19
  -7   9   1 2875.08 97.7473  26
  -7   1   9 974.970 111.600  11
  -9   7   1 1512.24 78.3382  26
  -7   9  -1 1392.01 74.6288  26
  -9   7  -1 1240.07 74.3688  26
   9   7   1 1540.15 95.9431  34
   1  -9   7 1547.37 90.8661  16
   1  -9   7 1503.63 84.2221  13
  -7   9   1 1108.55 76.8779   5
  -1  -9  -7 1219.84 57.4523  31
  -1  -9   7 1445.69 86.1113  16
  -9   1  -7 1255.86 75.4707  26
   1  -7   9 1405.57 89.7523  16
  -1  -7   9 1509.53 86.7028  16
   9   1  -7 1685.55 94.5200  34
  -1   7  -9 1444.65 90.4061  19
   7   1   9 1322.21 69.6350   8
  -7  -9  -1 1498.95 72.7772   7
  -1   7  -9 1254.59 70.9923  40
   7   9  -1 1540.97 96.0258  25
   9   7  -1 1374.16 90.5760  25
   1   9   7 1375.07 73.6997  23
   1   9  -7 1263.43 82.3616   2
   9   1  -7 1583.39 89.9164  25
   9  -1  -7 1285.13 81.3514  25
   7   1  -9 1476.12 92.6928  25
   9   7  -1 1220.77 95.9119   1
   1  -9   7 1530.20 66.7801  38
   7  -1  -9 1570.80 93.4209  25
   9  -7  -1 1027.35 107.858  15
  -1  -7   9 1487.82 71.5830   8
   9  -7   1 1319.60 111.666  15
  -1   9   7 1532.14 72.9787  30
  -1   9   7 1463.30 80.7658   5
   9   1   7 1234.97 60.1555  33
   1   7   9 1483.79 73.6081  24
   9  -7  -1 1177.97 87.8033  14
   1  -7   9 1436.44 74.4346  37
   1  -9   7 1454.26 72.7479  36
   1   7   9 1172.87 75.6867  17
  -7   9  -1 1500.84 77.3214  44
   7   1   9 1341.24 71.1547  24
  -7  -1  -9 1211.23 71.3870  10
   7  -1   9 1564.67 83.3028  24
   7  -9   1 1315.70 96.6280  16
   9   1   7 1639.52 100.519  15
   9  -1   7 1615.67 85.8523  24
   7  -1   9 1457.08 91.0758  15
  -9  -7  -1 1563.95 80.5018  37
   7   9  -1 1646.39 97.6194  34
  -1  -7   9 1484.25 71.5838  42
  -1  -7   9 1461.14 73.5188  37
  -1  -9   7 1462.69 68.4184  37
   9   7   1 1382.00 86.6507  25
  -7  -1   9 1710.17 65.9366  42
   9  -7  -1 1299.33 69.9988   9
   7  -1  -9 1263.53 66.8410   4
  -1   7  -9 1547.36 81.7764  39
  -9  -7  -1 1420.67 72.3058  36
   1  -7  -9 1693.68 98.3161  14
  -7  -9   1 1633.82 72.4199   7
   7   9  -1 1238.06 98.5885  12
   9   7  -1 1739.68 84.6755  41
  -7   1  -9 1645.37 82.2210   1
  -9  -1   7 1621.27 68.6308  42
   9   1  -7 1519.91 84.8727  41
   9  -1  -7 1931.79 95.7910  41
  -9  -1   7 1573.08 73.4561  20
   9  -7  -1 1582.73 78.6988  41
   7   9  -1 1801.38 80.9011  23
   7  -9   1 1291.96 68.5061   9
  -1   9   7 1318.34 78.5493  40
  -1  -7   9 1455.21 71.7476  36
   7  -9  -1 3021.13 108.552   9
   1  -9  -7 1821.88 99.2982  16
  -7   9   1 2754.20 103.465  40
   7   1  -9 1415.10 82.0631   9
   9   7   1 1356.70 118.360  12
  -1  -7   9 1552.94 98.2820  11
  -9   7   1 1527.63 77.7384  39
   7   9   1 1422.08 84.1996  29
  -9   7  -1 1333.07 74.8027  39
  -7   9  -1 1400.16 80.6634  39
   1  -9   7 1616.05 91.8612  14
  -1  -9   7 1446.60 85.8041  14
   7  -1  -9 1603.94 91.9036  34
  -7   1  -9 1510.89 74.8672   2
  -1   9  -7 1660.78 87.7705  39
  -7  -1   9 1710.04 67.7697  35
  -9  -1   7 1569.64 66.0708  21
   1   9   7 1302.34 58.3737  22
  -9  -7   1 1521.77 74.5543  36
  -1  -7   9 1596.93 98.3395  18
   9  -1   7 1368.88 74.6941  38
   7  -1   9 1183.18 65.6427  22
  -1   9   7 1322.66 60.1257  39
   7  -9  -1 2559.16 94.6332  41
   9   7  -1 1210.61 114.920  19
  -1   9   7 1116.52 57.0495  32
  -1   7  -9 1562.94 85.2801  28
   7  -9  -1 2192.88 104.949   4
   9  -7  -1 1049.40 71.4034   4
   1   7   9 1394.41 70.9787  23
   7   1   9 1297.27 68.8293  22
   1  -9   7 1268.07 66.3696  37
   7  -9   1 1617.04 69.9943  38
   7   1   9 1927.07 83.3871  30
  -9   1   7 1597.46 71.0443  20
   7   9   1 1513.56 93.4409  34
  -7  -1   9 1609.96 68.6134  21
   7  -9  -1 1730.90 77.2028  31
  -7   1   9 1512.84 67.3623  26
  -7   1   9 1514.98 68.1577  21
   9  -1   7 1173.64 65.5313  31
  -9  -7   1 1470.46 74.6986  37
   9  -7   1 1039.70 70.0623   4
  -9   1   7 1638.58 71.2886  21
  -1   9  -7 1478.10 81.1223  40
  -7  -9  -1 1735.15 95.7772  18
   7   9   1 1575.57 79.9537  23
  -1  -7   9 1442.38 84.7564  14
   7   9   1 1595.53 72.2398  22
   7  -1  -9 1536.84 87.7055   9
   7  -1   9 1291.91 69.0954   8
   9  -7  -1 1144.60 87.1431  16
   1  -7   9 1407.50 81.6359  13
  -1   9  -7 1306.90 93.6780  12
   9   1  -7 1267.60 87.4430   1
   1   7   9 1574.32 74.5614  30
  -1  -9   7 1341.59 66.3413  35
  -1   9   7 1330.09 82.6104  17
   9  -1  -7 1478.64 86.1924   9
   1  -9   7 1281.38 66.3185  35
   1  -7   9 1340.24 66.1094  35
  -1  -7   9 1446.34 67.7406  35
  -1  -9   7 1628.56 63.5769  38
   1  -9  -7 1237.16 63.1820  33
   9  -7   1 1090.81 84.1179  14
   1  -9   7 1235.68 71.6157   4
   1   7  -9 1439.56 87.5646   1
  -7   1   9 1580.97 68.1493  20
  -7   9  -1 1472.42 76.7579  21
  -7  -9  -1 1329.69 62.6361  38
   1  -9   7 1630.40 76.1601   8
  -9   7   1 1297.10 71.0764  44
   9   1  -7 1363.24 80.5435   9
   1  -7  -9 1226.03 62.8957  33
  -1   7  -9 1265.89 79.9063   2
   7  -9  -1 2650.38 128.766  14
   9  -1  -7 1411.78 87.5301  34
   1  -7  -9 1435.88 78.4263   4
   1  -7   9 1473.75 92.4355   6
   7   1  -9 1523.55 88.5532  34
   7  -9   1 1452.04 71.8498  22
   1   9  -7 1528.94 97.2970  12
   9   7   1 1717.69 78.6058  33
   9   7   1 1789.62 76.9632  22
   9   7  -1 1836.35 85.7794  23
   1   7  -9 1547.15 95.1354  19
   1  -7  -9 1635.83 82.4115   3
   9  -7   1 1405.98 74.1340  33
   9  -7  -1 1461.66 76.1813  33
   7  -9  -1 2206.37 84.8066  33
  -7   1   9 1278.16 78.9902  13
  -1   7   9 1413.81 71.4377  28
  -1   7  -9 1333.38 81.4944   1
   7   1  -9 1722.91 105.927  19
   9   1  -7 1325.41 101.494  19
   9  -1  -7 1217.05 94.6598  19
   7  -9   1 1227.55 94.6933  14
  -1  -7  -9 1600.76 78.4024   3
   9   1   7 1722.87 74.7919  32
   7  -1   9 1591.33 70.7695  32
  -9  -7   1 1550.49 74.5555   7
   1   7   9 1326.33 64.4342  32
  -1   7   9 1598.39 74.2166  23
  -1   7   9 1085.36 60.6022  32
   9  -7   1 1559.67 77.2344  27
  -7  -1  -9 1592.01 74.5631   1
   7  -1   9 1071.54 54.3295  31
   9   1   7 1081.22 63.1110  31
  -7  -9  -1 1453.48 71.8156  36
   9  -7   1 1554.55 90.2022  24
  -1   9  -7 1457.90 80.5257  29
  -9   1   7 858.944 63.9141   7
   9  -7   1 1487.54 73.0608  31
  -7   1   9 1470.29 66.9025  35
   9  -7  -1 1371.02 70.5445  31
  -9   1   7 1572.99 64.6899  42
   1   9  -7 1618.61 88.8245  29
  -1  -7   9 1476.45 79.8456  13
  -9   1  -7 1549.15 75.1160   2
   7   9  -1 1616.44 80.1746  41
  -9  -1   7 1015.59 64.9865   7
   9   7  -1 1786.13 83.4558   9
   1  -9   7 1208.48 66.5569  42
   1  -9  -7 1255.08 58.0440  31
  -9  -3   7 8621.29 161.070  42
  -9  -7   3 9085.38 201.464  18
  -3  -9   7 9848.51 211.298  18
  -9   3   7 4196.72 139.824   7
   7   3   9 8356.42 179.314  30
   9   7  -3 8348.01 201.807  25
   7   9   3 5781.36 225.064  12
   3   7   9 8043.62 170.249  30
   7   9   3 8847.11 165.131  30
  -7  -3   9 8716.35 159.851  42
  -7   3   9 6303.17 158.642   7
  -3   7  -9 8075.88 188.352   1
   9  -3  -7 8221.66 194.808  41
  -7  -3  -9 6558.04 155.038  10
   9   7  -3 6788.60 227.404  19
   9   7   3 5030.42 215.807  12
  -7   3   9 5962.79 230.381  18
   7   3  -9 9159.50 196.967   9
   9  -7   3 9920.13 210.260  24
   3   9   7 7805.99 188.195  29
   3  -7  -9 8402.47 165.792  33
   7   9  -3 7025.20 179.517  29
  -7   3   9 8111.64 158.562  21
   3   9  -7 9077.53 202.172  29
   7  -9   3 6008.71 180.248   6
   9  -7   3 8283.28 168.028  38
  -9   7   3 6124.32 166.614   7
   3   7  -9 8746.14 195.569  29
   9   7  -3 6298.46 194.858   1
   7   3  -9 8875.48 195.947  29
   3  -9   7 8026.41 216.037   6
   9  -7  -3 8120.58 174.106  33
   3   7  -9 8360.48 189.400  40
   7   3  -9 8825.93 210.217   1
   7   9  -3 9960.30 205.418   9
   7  -9   3 9555.10 200.897  24
  -3   7   9 8629.48 175.063  28
  -9   7  -3 8948.41 205.081  17
  -7   9  -3 7091.78 161.971   2
   3  -7   9 7643.90 209.473   6
  -3  -9  -7 8765.77 167.809   7
  -3   9   7 8983.90 179.966  28
  -7   3   9 8076.36 157.383  39
  -7   9   3 8516.69 170.167  28
  -9   7   3 5504.29 167.592  17
  -7  -9   3 8098.34 182.590   3
   3   7  -9 8699.78 204.332   1
  -7   9   3 6410.10 186.198  17
  -7  -9  -3 8030.04 164.841   7
   9  -3   7 7392.02 191.030   6
  -3   9  -7 7760.71 178.939  28
   3   7   9 7476.70 158.105  23
   3   9  -7 8886.35 184.313  28
  -3   7  -9 7449.37 171.524  28
   7  -3   9 6849.74 201.468   6
  -7  -9  -3 8636.12 196.664  11
   3   7  -9 8255.69 179.939  28
   7   3  -9 9933.14 239.463  19
  -3   9   7 11427.5 229.687  17
  -3   7   9 9554.55 191.760  17
   9  -7  -3 8926.41 190.360  41
  -9  -7   3 8107.31 172.669   3
   7   9   3 4804.38 180.444  43
  -9  -3  -7 8951.22 178.360   2
   3  -7  -9 8144.87 205.381  14
   3   9   7 6557.05 184.053  17
   3  -7   9 7745.69 155.380  35
   3  -9   7 8883.27 215.129  14
   9  -7   3 8519.38 183.930  27
   7   3   9 8777.86 169.012  32
  -9  -7   3 8932.88 170.199  36
  -7  -9   3 8672.61 212.838  11
   7  -9   3 8080.73 174.284  27
  -3  -9   7 10553.4 214.952   3
  -7   3  -9 9969.84 194.932   2
   3  -9   7 8173.12 167.853  27
   7  -3   9 7005.22 159.576   8
  -9  -7   3 9095.22 201.532  11
  -3  -7  -9 8368.90 167.903   3
  -7   9   3 9494.09 181.983  32
   9   3  -7 8074.15 186.615   9
  -3  -9   7 9648.91 164.681  27
  -9  -3   7 7736.08 212.215  18
  -3  -9   7 9676.52 210.052  11
   7   3   9 7291.24 199.112   6
  -3  -9   7 7638.10 149.815  35
   3   9  -7 8508.85 203.439   2
   3  -7  -9 8079.04 204.708  16
  -3   9   7 8916.77 165.988  35
  -7  -9  -3 7387.42 145.567  27
  -9  -7   3 8403.70 155.770  27
  -9  -3   7 7550.94 211.299  11
  -3  -7   9 9236.35 231.915  11
   7   9  -3 6599.63 183.389   2
  -9  -7  -3 8229.96 176.172  37
   7  -9  -3 7797.54 204.156  16
   9  -7  -3 7624.22 190.605  16
   9   3   7 8342.05 169.672  30
  -3  -7   9 7907.79 189.647   3
  -7  -3   9 4912.60 193.536  11
   9  -7  -3 7574.97 188.769  14
  -7   3   9 7928.86 155.790  26
  -9   3   7 8785.37 167.972  26
   7  -9   3 7875.88 209.593  16
  -7   9   3 11327.3 184.738  26
   9  -7   3 8571.18 201.786  16
   3   7  -9 9276.47 221.363  19
   9   3   7 6951.83 224.686  19
  -9   7  -3 8712.80 193.045  26
  -7   9  -3 8434.38 184.421  26
   3  -9   7 9108.65 219.976  16
   3  -9  -7 8931.71 211.255  16
   7  -3  -9 7236.12 167.267   4
  -9   3  -7 6807.02 168.301  26
  -7  -3   9 4683.67 159.257   3
  -3   9   7 8949.07 165.025  39
   9  -7   3 8176.13 196.809  14
   7  -9  -3 8110.63 174.534  41
   7  -9  -3 6818.08 170.915   4
  -7   9   3 6734.32 160.345   5
   7   9   3 8373.89 211.773  25
  -7   9  -3 7659.40 173.810  44
  -9  -7   3 7286.21 161.502  37
   7   9  -3 8716.95 212.674  25
  -3   9   7 8925.07 187.186   5
   9   3  -7 8554.58 197.344  25
   9  -3  -7 8822.32 205.364   9
  -3  -9   7 9419.90 178.025  36
   7   3  -9 8808.34 204.975  25
   9  -3  -7 7689.49 174.355  25
   7  -3  -9 8593.49 202.383  25
   3   9  -7 9043.99 183.196   9
  -9   3  -7 6876.25 165.898  21
   9  -7   3 7290.95 209.284  15
   3   7   9 8279.56 171.658  24
   7   3   9 8947.00 171.703  22
  -9   7  -3 8109.84 178.756  44
   9  -3   7 10343.7 244.553  15
  -9   7   3 5944.88 146.918  44
  -7   9   3 6180.15 152.298  44
   3  -7   9 11933.0 189.396  24
   9  -3   7 11752.7 232.180  24
   3  -9  -7 7064.22 169.939   9
  -3  -9   7 8014.28 155.557  42
   7   3   9 5977.59 182.632  15
   7  -9   3 7761.81 162.894  38
  -9   3   7 9088.33 171.741  21
   7  -3   9 10183.0 227.951  15
  -3  -9  -7 7584.07 163.237   3
   3  -7   9 8311.26 161.176  27
   7  -9   3 7721.80 206.345  14
   9   7   3 7542.92 171.256  41
  -7   9  -3 8347.60 181.258  21
   9  -3  -7 8530.39 185.093  33
   3  -7   9 8739.81 219.818  16
   3  -7  -9 7544.15 167.607  34
   7  -3  -9 9015.70 202.690  34
   3  -9  -7 6548.85 160.675  41
   9   7  -3 10126.4 189.087  23
   7   3   9 9129.95 180.246  24
  -3   7   9 7352.38 159.020  32
   3   7   9 9486.71 181.222   8
   3  -7   9 8790.96 218.614  14
   7  -9  -3 7911.60 204.962  14
  -7   9  -3 7229.51 169.410  12
  -7  -9   3 8668.49 159.882  27
   7   9   3 8513.82 187.532  23
   9  -7  -3 8281.14 180.959   9
  -3   7  -9 8317.61 194.124   2
   7  -9  -3 8149.39 157.932  31
   7  -3  -9 9366.12 210.745   9
   3   9   7 7737.67 173.501  30
   3   9   7 7630.14 148.856  22
  -9  -3   7 6448.91 171.663   3
   7   3   9 8036.17 173.775   8
  -7   9   3 8593.76 170.589  39
   7   9   3 9182.70 177.577  22
  -7   9  -3 8028.61 179.000  39
   9   7   3 9236.78 180.466  22
   3  -9   7 8271.13 163.534  38
   3  -9   7 7895.90 169.349  36
   9   3  -7 7939.92 224.383  19
  -7   3  -9 6558.45 147.047  39
  -3   7  -9 7667.18 175.235  39
  -9   3  -7 7821.64 168.151   2
   7  -3   9 7301.46 161.024  22
  -3   9  -7 8855.43 191.266  39
  -9  -7   3 11193.9 180.090   7
   7  -9  -3 7090.09 172.660   9
   9  -7  -3 6572.01 158.274   4
   9  -7   3 8375.11 179.820  22
  -9  -3   7 8824.16 170.905  20
  -9   7  -3 7531.60 152.469   2
   3   9   7 7822.47 170.510  23
  -7  -9   3 9094.93 150.540  38
   3  -9   7 7726.82 161.505  22
   7  -3   9 9293.63 171.675  32
   3  -7   9 7736.77 175.464  37
   3  -9   7 7536.04 166.034   8
  -3  -7   9 8479.54 172.003  37
  -7  -3   9 8675.15 161.013  37
   3  -7   9 7877.63 171.270   8
  -9  -3   7 9034.99 166.722  37
   3  -7   9 7999.04 153.752  38
   7  -9   3 7376.84 167.000  22
  -7   9   3 11448.2 185.947  21
  -9   7   3 9057.38 179.285  21
   7  -9   3 6550.87 169.404   4
  -3  -9   7 10187.3 179.905  37
   3  -9   7 8676.49 206.283  13
  -3   7   9 7962.02 159.444  39
  -9   7   3 9122.05 179.266  26
  -7  -9  -3 7108.92 144.502  38
  -9   7  -3 8571.31 189.384  21
   3  -7   9 7987.58 197.712  13
  -9   3   7 8917.67 165.469  35
  -3  -7   9 8779.75 158.093   8
   9   7   3 8272.11 199.778  25
   7  -3   9 7375.49 181.263  13
  -9   7   3 8643.00 171.965  35
   3  -9   7 7340.63 176.231   4
  -9  -7  -3 7469.80 162.338  36
   9  -3  -7 7907.39 189.759  34
   3  -9  -7 8190.04 161.079  33
  -3  -7   9 9111.84 228.099  18
  -7   3   9 5901.55 230.709  11
   3  -9  -7 8062.43 168.336   3
  -3  -7   9 7624.96 146.993  35
   9   3   7 8553.26 213.503  15
  -7   9   3 8565.50 182.698  40
  -3   7   9 8468.74 159.919  35
  -7  -3   9 9221.39 170.395  20
  -7   3   9 8845.00 154.174  20
   3  -7  -9 6934.43 170.730   4
  -9   3   7 8774.12 156.668  20
   7   9   3 7154.91 192.862  34
   9   7  -3 9184.48 204.430  34
  -7   3   9 7261.31 189.364  13
  -7   3  -9 10693.0 222.847  12
   9   3  -7 8799.53 178.156  41
  -3  -7   9 8227.38 163.333  42
   7   9  -3 7406.79 214.563  12
  -7  -9  -3 7619.70 158.451  36
  -9   3   7 8026.04 187.267  13
  -9   7  -3 6945.83 159.292  20
  -7  -9   3 8640.37 211.809  18
  -7  -3   9 5059.96 192.689  18
   3  -9  -7 8675.24 208.316  14
   3  -9  -7 7856.68 175.044   4
   9  -7  -3 8349.21 163.909  31
  -3  -7   9 8747.87 164.655  36
  -7  -9   3 8952.40 167.404  37
  -3   7   9 11172.3 193.532  23
  -9  -7   3 8902.62 151.868  44
   9  -3   7 8028.63 180.109  38
   3  -7  -9 7372.38 173.602   3
   7  -9  -3 9129.09 172.427  33
   3   9  -7 8615.99 194.963  19
  -9  -7  -3 7844.02 168.322   7
  -9   7  -3 7113.84 163.268  39
   7  -3   9 7425.15 166.974  38
  -3   9  -7 7985.57 172.013  40
   7   9  -3 9162.08 179.287  41
   9   3   7 9128.18 165.256  32
  -9   7  -3 8374.49 174.391  12
  -3   7   9 8597.66 210.051  13
   9   3  -7 9036.45 202.045  34
  -7   3  -9 9626.00 199.870   1
   9  -3   7 11091.3 190.683  32
   3   7   9 7150.85 145.690  32
  -7  -3   9 9305.86 159.346  35
  -9   3   7 8959.66 168.154  32
   9   7  -3 9471.51 187.447  41
  -3   7  -9 9265.55 211.550  12
  -3   9   7 8956.98 168.486  32
  -3   9   7 8967.89 174.426  23
  -7   3   9 7587.94 156.799  32
  -3  -7  -9 7967.70 155.640   7
  -3   9  -7 7556.91 206.949  12
  -9   7   3 8539.49 166.428  39
  -9  -7   3 8623.27 153.921  42
   7  -9   3 8549.61 165.344  31
  -7  -9  -3 8615.47 196.470  18
  -7   3   9 8191.05 162.037  35
   9   3  -7 7126.43 192.145   1
   9  -3   7 8658.76 172.384  31
   7  -3   9 10825.9 215.410  24
  -3   9  -7 6567.11 177.968   2
   3   9  -7 9031.14 220.045  12
  -7  -9  -3 7675.38 170.690   3
   9  -7   3 8626.88 173.518  31
   9   7  -3 9459.36 191.550   9
  -9  -7  -3 8138.73 158.496  44
  -5   7  -9 7347.11 168.562  28
   5   9   7 7804.11 179.508  23
  -7  -9   5 8485.63 219.601  18
  -5  -7   9 8687.32 236.205  18
   9   5   7 8445.89 178.609  30
   7   5   9 8641.00 189.082  30
  -9  -7  -5 6415.52 157.126  36
   7   5  -9 8753.46 199.018  40
   7   9   5 5658.75 233.001  12
   7  -9  -5 8924.31 169.186  34
  -7   5   9 9486.26 174.497  21
   7  -5   9 8569.87 209.650  13
  -9   7  -5 7701.38 173.309  39
  -7   9   5 9017.60 181.529  39
   7  -9   5 6778.15 202.527   6
   5  -9  -7 7641.78 183.368  41
   5   9   7 7441.24 183.800  29
  -7  -9  -5 6626.59 147.901  38
  -9   7   5 8380.88 181.256  35
   5   9  -7 8424.08 225.877  19
   7  -5  -9 7930.55 207.825  14
   7   9  -5 7952.82 224.632  12
  -7  -5   9 8829.98 169.743  42
  -5  -9   7 9477.53 219.720  18
  -5   7   9 9339.76 187.699  28
  -5   9   7 8999.61 184.392  28
  -5   7   9 9040.79 226.520  13
  -5  -9  -7 9644.58 213.890  11
  -9   7   5 6219.00 178.076  17
  -7   9   5 7323.75 199.718  17
   7  -5   9 9259.49 225.840  16
  -5   9   7 10258.8 223.900  17
   5   7  -9 8735.01 182.682  28
  -7  -9   5 9569.53 182.540  37
  -5   9  -7 7748.94 178.532  28
   7  -5   9 8266.62 175.603  27
   9  -7   5 8890.09 193.729  27
   5  -7   9 8351.08 172.770  27
  -5   9  -7 8131.92 194.671  39
   5  -9   7 8377.54 179.505  27
   9  -7  -5 7362.09 190.100  14
  -7  -9   5 8505.47 220.544  11
   9   7   5 9840.86 195.426  22
  -5  -9   7 9619.81 221.422  11
  -9  -7   5 9187.33 212.310  11
   7  -5  -9 8503.85 200.208  34
  -7  -9   5 9075.92 166.784  27
   5  -7   9 8284.46 192.796  36
  -9   5   7 8807.55 171.440  39
   7  -5  -9 8108.74 209.157  16
  -5  -7   9 8672.12 172.296  42
  -9  -7   5 8619.42 158.171  27
   9  -5  -7 8249.43 196.759  16
   5   7   9 8133.70 161.084  22
   5  -9  -7 8491.97 215.417  16
  -5  -7   9 8906.29 241.185  11
  -9  -5   7 8369.43 230.161  11
   9  -7  -5 7572.24 193.530  16
   7  -9  -5 7357.94 202.195  16
   9   7   5 8301.14 165.954  30
  -7  -5   9 6397.50 221.234  11
   5  -9   7 8541.50 185.315  36
  -7   5   9 9382.06 171.994  26
  -9   5   7 9464.26 176.291  26
  -7   9   5 10021.4 168.191  26
  -9   7   5 9187.97 171.852  26
   5  -9   7 13292.3 227.335  24
   7  -9   5 8928.86 231.933  16
   5  -9   7 9375.53 235.255  16
  -7  -9  -5 7032.23 156.065  36
   9  -5   7 8592.00 189.411  27
  -9   7  -5 8280.97 196.546  26
  -7   9  -5 8844.63 197.529  26
  -7  -5   9 6484.14 217.521  18
  -9   5  -7 7382.02 183.566  26
  -5   9  -7 8378.52 187.319  26
   5  -7   9 9571.69 240.806  16
  -7   5  -9 7128.48 175.954  26
  -5   7   9 9153.42 164.355  21
  -9   5  -7 6710.34 160.927  39
  -7   5   9 6110.78 244.494  11
   5  -9   7 9112.29 230.413  14
   7  -9   5 7186.48 209.300  13
   7   9   5 7872.61 210.731  25
   7   9   5 9212.11 184.657  22
   7   9  -5 7988.82 199.916  29
   7   9  -5 8349.21 228.245  25
  -7   9   5 7697.47 170.145   5
   7  -5  -9 9074.71 206.544  41
   5   7  -9 9119.03 201.539  25
   7   5  -9 8648.25 211.556  25
  -5   9  -7 8184.19 183.629  21
  -9  -7   5 9294.91 213.763  18
   9  -5  -7 6926.18 164.922  25
   9   7  -5 5541.05 190.834   1
   7  -5  -9 8063.39 196.196  25
  -5   9   7 8625.60 182.482   5
   9  -7   5 8073.00 215.658  13
   5   7   9 8382.10 185.802  30
   7   5   9 8690.85 172.000  32
   9  -7   5 8482.42 228.249  15
  -9  -5   7 8454.24 168.602  42
   9  -5   7 10124.3 245.934  15
   9  -5  -7 8036.79 194.634  14
   5   9  -7 8914.35 205.208  40
   5   7   9 7185.24 160.959  23
   9  -7   5 11924.5 232.904  24
  -5  -9   7 8583.41 165.397  42
  -7  -9   5 8233.02 156.247  42
   7  -5   9 8801.22 186.784  38
  -9  -7   5 8450.74 162.852  42
   9  -5   7 8625.06 192.732  38
  -5   7  -9 8904.64 214.114  12
  -9  -7   5 9055.51 184.241  37
   5  -9  -7 9513.36 186.304  33
  -9   7   5 7846.67 178.282  32
  -7  -5   9 8931.51 177.323  37
  -5   7   9 10598.4 199.351  23
  -9   5  -7 7075.72 177.654  21
  -5   9   7 9632.80 187.888  23
   9  -5   7 10139.5 219.039  13
   9  -7  -5 8201.19 173.634  34
  -5  -9   7 9153.70 179.255  37
   9  -5  -7 8314.55 201.523  41
   9  -5  -7 8469.65 195.593  34
   5  -7  -9 8696.33 200.522  41
   9  -7   5 8886.93 193.879  22
  -5   7  -9 7668.64 182.687  39
   5  -9  -7 8222.02 212.209  14
  -7   9   5 10050.6 169.862  21
   9   5   7 7645.16 164.687  23
   7  -9   5 8718.95 227.813  14
   9  -7  -5 6810.53 168.148   4
   7  -9   5 8261.51 176.118  38
   9   5  -7 8572.77 185.013  40
   5   9   7 8559.57 174.171  22
   5  -7   9 8926.78 179.916  22
  -5  -7   9 8915.54 164.944  36
  -9   7   5 8879.46 176.234  39
   7  -5   9 8211.19 195.758  36
   5   9   7 7556.60 241.511  12
  -7   9  -5 7727.99 183.866  39
   5  -9   7 8163.91 174.369  38
   7   5   9 8610.85 177.365  22
  -7   5  -9 7311.01 168.801  39
   9  -5   7 12791.2 253.534  24
   5  -7   9 9583.35 238.981  14
  -5  -9  -7 6494.71 143.039  38
   7  -9   5 8089.02 183.054  22
   7  -9   5 8703.63 187.411  27
   9   7   5 7961.54 186.821  23
  -5  -9   7 9057.07 177.624  36
  -5  -7   9 9081.65 182.131  37
   7  -5   9 8792.19 182.723  22
   5  -7   9 8215.97 169.961  38
   5  -9   7 7978.31 177.930  22
   5   7  -9 8502.58 225.262  19
   5   7  -9 8481.88 196.624  40
  -9   7  -5 8833.80 194.950  12
   7   5  -9 8419.62 202.109  29
   7  -9  -5 7272.06 200.970  14
  -7   5   9 5791.97 239.930  18
  -5  -7   9 8660.40 165.426  20
  -9  -5   7 9152.79 181.924  37
  -9   5   7 9422.44 177.247  21
  -9   7   5 9208.31 173.866  21
   5   9   7 7997.29 183.778  30
   5  -9   7 8901.82 221.815  13
  -5   7   9 9015.25 161.894  26
  -7  -9   5 9477.45 178.478  36
   7   9   5 8342.78 176.387  30
  -9   7  -5 7699.74 188.358  21
  -5   9   7 9197.03 180.871  35
  -7   5   9 7899.38 209.199  13
  -9  -7   5 9366.72 165.205  36
  -7   5  -9 6971.19 171.783  21
  -7  -5   9 9144.87 173.645  20
  -5  -9   7 9321.34 164.565  27
  -9  -5   7 8032.45 224.336  18
   9  -7   5 8905.10 189.432  38
   7   9  -5 8817.72 194.131  40
  -7   5   9 8747.09 176.666  35
  -5   7   9 9626.86 183.483  35
  -9   5   7 9663.18 186.764  35
   5  -7  -9 8459.71 188.229  34
  -9  -5   7 9386.02 174.228  20
   9   7  -5 9402.88 188.738  41
  -7   9  -5 7569.42 189.010  12
   9   7   5 7274.43 199.016  34
   7  -9   5 11292.1 219.488  24
   9   7  -5 10187.3 217.811  34
  -7   9  -5 8515.19 192.144  21
   9   5  -7 9454.58 208.469  34
  -9   7  -5 6104.80 162.880  20
   5  -9  -7 8133.14 173.139  34
   5   9  -7 9137.25 205.861  25
  -7   5   9 9052.18 175.380  39
  -7   9   5 7996.82 174.259  35
   5  -7   9 12759.3 221.723  24
   7  -5   9 9366.26 226.224  14
   9  -5  -7 8107.77 186.241  33
   9  -7  -5 8814.81 189.201  33
   5  -7  -9 9541.53 190.459  33
  -7   9   5 8430.09 173.013  28
   9   7  -5 6057.00 218.520  19
  -7   9   5 8548.08 189.763  40
  -7   5  -9 9666.87 218.465  12
   5  -9  -7 7616.69 165.204   3
   9   7   5 7967.85 199.479  25
   5   7   9 8261.92 160.760  32
  -7   5   9 9387.88 183.011  32
  -5   9   7 10231.9 191.639  32
  -9   5   7 8757.92 182.411  32
  -7   9   5 9553.12 188.977  32
   5   9  -7 8047.40 202.737  29
   7  -5   9 9729.28 227.649  15
   9  -5   7 9188.31 181.041  31
  -5  -7   9 7990.12 151.337  35
  -5   9   7 9612.62 183.682  39
   9  -7   5 9319.07 182.751  31
   7  -9   5 7876.18 162.187  31
  -5  -9  -7 9682.63 214.870  18
  -5   9  -7 7440.02 200.125  12
   7  -9  -5 8644.87 164.052  31
   7  -5   9 10386.6 185.870  32
   7   7   9 974.539 67.2182  22
  -7  -9   7 1208.17 106.738  18
  -9  -7   7 1024.76 100.025  18
  -7  -7   9 863.702 93.3442  18
   7   7   9 955.237 71.0243  30
   7   9   7 934.365 69.3300  30
   7  -7  -9 1099.29 76.5716  33
  -7   9   7 1088.52 72.0318  32
  -9  -7  -7 597.295 58.2448  36
   7  -9   7 1025.92 93.3241  14
   7   9  -7 1055.58 89.3085  29
   7  -7   9 947.688 69.1679  38
   9   7  -7 799.446 78.2535  29
   7   7  -9 769.040 80.2152  29
   9  -7   7 922.907 69.7841  38
  -7   7  -9 820.483 73.9575  39
  -7   9   7 1066.03 69.1649  28
  -7   7   9 1094.38 63.5326  21
  -7   9   7 868.378 81.0908  17
   7  -9  -7 983.274 71.7012  34
   7  -9   7 1522.90 92.1972  24
   7   7  -9 914.815 77.6854  40
   9  -7   7 1020.14 72.3590  27
   7  -7   9 945.030 67.9185  27
   7  -9   7 995.136 71.0312  27
  -7   9   7 1016.26 66.9220  39
  -9  -7   7 942.351 61.1502  42
   7  -9   7 879.075 68.7711  22
   9  -7  -7 907.367 73.2459  33
  -7  -9   7 946.313 57.2929  27
  -7  -9   7 1204.99 108.013  11
   7  -7  -9 935.025 96.3016  16
  -9  -7   7 1061.67 100.110  11
   9  -7  -7 800.215 92.7888  16
  -7  -7   9 858.583 95.0138  11
  -9   7   7 989.328 63.3162  26
   7   9   7 657.967 122.881  12
   7  -9   7 1008.45 95.2980  16
  -7   9  -7 938.763 86.4618  26
  -7   7  -9 864.432 80.2727  26
   7  -7   9 1132.67 96.2892  16
   7  -7   9 1193.85 96.7196  14
   7  -9   7 974.518 71.2600  36
   7   9  -7 946.578 88.9079  25
   9   7  -7 839.995 84.0419  25
   7   7  -9 936.617 85.9714  25
   7  -7  -9 934.806 95.2956  14
  -7  -9   7 930.155 59.3559  42
  -7  -7   9 972.902 62.4159  42
   7  -7  -9 807.536 72.5560  25
   7   9  -7 1016.38 82.9150  40
   9  -7   7 1036.56 93.5014  15
   7  -7   9 1500.05 89.3377  24
   9   7   7 921.843 66.3646  30
   9  -7  -7 907.698 76.7686  41
   7   7   9 818.707 64.4309  23
   7   9   7 815.037 70.7177  23
   9   7   7 868.356 69.7906  23
  -9   7   7 979.749 78.9558  17
  -7  -9   7 1012.31 66.0049  37
  -7   7   9 919.794 86.0111  13
   7  -7   9 1047.45 86.5063  13
  -7   9  -7 892.013 84.2073  21
   7  -7   9 1063.28 73.4360  22
   7   9   7 1054.69 69.5934  22
  -7   7   9 1016.03 60.5468  26
  -9   7  -7 769.060 70.7861  39
  -7   9  -7 758.764 75.5047  39
  -7  -9  -7 677.065 56.6739  38
  -9   7   7 1153.00 70.0656  39
  -9  -7   7 1004.71 65.9805  37
  -9   7  -7 752.431 79.5769  21
   9  -7   7 1086.41 77.5402  36
   7  -7   9 967.559 72.7185  36
   9  -7   7 1042.51 88.9178  13
   9  -7   7 1470.05 94.9503  24
   7  -9  -7 797.264 94.7120  16
  -7   7  -9 709.462 74.7551  21
   7  -7  -9 1002.26 86.2667  41
   7  -9  -7 942.946 77.5455  41
  -7  -7   9 958.582 60.1776  20
  -9   7  -7 841.292 83.3757  26
  -9   7   7 1013.99 68.2344  35
   9  -7  -7 817.095 93.6383  14
   7  -9  -7 839.105 95.2322  14
   9  -7   7 1002.90 64.9838  31
   9  -7  -7 946.796 76.8634  34
  -7  -9   7 957.408 62.2838  36
  -9   7   7 1056.79 65.7340  21
   7  -9  -7 1013.89 72.3387  33
   7   7  -9 978.247 110.603  19
   7   9  -7 778.407 106.080  19
   9   7  -7 891.986 110.372  19
  -7   7   9 1063.09 65.6747  39
  -9   7  -7 957.918 77.2922  12
  -9   7   7 985.176 69.2064  32
  -7   7  -9 903.709 78.7170  12
  -7   9  -7 840.866 77.7218  12
  -7   7   9 1033.88 68.3617  32
  -9  -9   1 3256.24 136.107  18
  -1   9   9 3780.23 119.858  23
   9   9  -1 2731.89 165.856  12
   1   9   9 3242.28 114.657  30
  -9  -1   9 2354.56 153.395  18
  -9   1   9 1931.76 150.019  18
   9  -9  -1 3453.40 114.302  41
  -9   1   9 3363.95 105.263  21
  -1   9   9 3008.71 127.448  17
   1   9  -9 3147.55 123.891  29
   9  -1   9 2522.36 94.7397  31
   1   9   9 3077.48 112.479  23
  -9   9  -1 2691.89 126.547  17
  -9   9   1 2375.29 122.970  17
  -1   9  -9 3106.29 146.502  12
  -1   9  -9 2945.06 124.913  28
   1   9  -9 3291.85 127.786  28
   1   9   9 2489.42 119.745  17
  -9  -9   1 3007.89 106.511  37
  -9  -9   1 3265.52 136.842  11
  -9  -9   1 2743.02 96.8249  27
  -9  -9  -1 2819.10 96.3724  27
  -9  -9  -1 2701.82 93.6517  38
   9  -9  -1 2720.85 134.362  16
  -9   1   9 3249.23 102.836  26
  -9  -9  -1 2946.49 107.252  36
   9  -9   1 2318.21 127.522  16
  -9  -1   9 2370.53 155.184  11
  -9   9   1 3247.86 113.527  26
  -9   1   9 1952.90 151.789  11
  -9   9  -1 3090.70 115.625  26
  -9   1   9 3354.96 105.075  35
  -9   1  -9 2490.76 106.719  26
   1  -9   9 3388.90 144.344  16
  -1  -9   9 3479.90 136.349  16
   1  -9   9 2894.35 109.634  37
   9   9   1 3417.42 147.646  25
   9   1  -9 3269.32 137.232  25
   9  -1  -9 3076.92 133.164  25
   9   9  -1 3829.64 130.902  23
   9   9  -1 2973.99 141.419  25
   9  -9  -1 2470.37 150.735  15
   9  -9   1 2367.05 145.053  15
  -9   9   1 2845.05 105.710  39
  -1   9   9 2833.88 93.9471  39
   9   1   9 2608.60 106.255  24
   9  -9  -1 2896.95 109.349  33
  -1  -9   9 2695.59 105.226  42
  -9  -1   9 3135.09 96.9651  42
   9  -9   1 3119.13 130.907  24
   1  -9   9 2888.08 103.477  35
   9  -9   1 2413.93 128.430  14
   1   9  -9 3118.66 124.100  40
   1  -9  -9 3450.70 139.498  14
   9   9   1 3599.38 132.729  23
   1   9  -9 3339.53 137.395  19
  -9   9   1 3307.01 115.297  21
   9  -9  -1 2554.32 130.101  14
   1  -9   9 3062.95 126.764  13
  -1  -9   9 3383.75 133.734  14
   9   9   1 3255.65 148.319  34
   9   9   1 3703.68 116.988  22
  -9   9  -1 2891.54 114.935  39
   9  -1   9 3539.88 135.679  24
   1  -9   9 3430.57 143.040  14
   9   9  -1 3448.37 125.873  41
   9   1  -9 2888.06 146.749  19
   9  -1   9 2609.74 106.898  22
   9  -1   9 3428.38 151.058  15
   1  -9   9 3045.99 102.802  27
  -1  -9   9 3034.98 112.544  37
   9  -9   1 3090.62 108.589  31
  -1  -9   9 3064.90 112.821  36
  -9  -1   9 3398.89 105.318  21
   9  -9   1 2962.82 109.821  22
  -9   9  -1 3133.47 116.725  21
  -9  -1   9 3319.65 102.782  26
   9  -1   9 3589.03 115.122  32
  -9   1  -9 2441.22 103.960  21
  -1   9   9 3331.25 115.326  28
  -1  -9   9 2851.65 102.467  35
  -9  -1   9 3336.87 100.128  35
   1  -9  -9 3397.71 139.193  16
  -1   9   9 2577.97 96.2464  32
  -9   1   9 3412.93 107.650  20
   9  -9   1 3122.05 114.112  27
   9   9  -1 3606.95 150.575  34
   9   1  -9 3434.46 140.186  34
   9  -1  -9 3182.91 135.798  34
   9   1   9 3263.48 117.791  30
   9   9   1 2342.18 160.073  12
   9   1   9 2753.41 110.002  22
   1  -9  -9 2596.31 96.2620  33
  -1   9  -9 3242.48 123.171  39
  -1   9  -9 3130.03 131.707  19
   1   9   9 2890.19 105.645  28
   9   1   9 3803.75 116.364  32
   1   9  -9 3374.46 119.800  39
   1   9   9 2583.53 93.1609  32
  -9  -9   1 2856.12 93.2293  38
   1   9  -9 2832.24 139.499  12
   9  -9  -1 3194.56 108.563  31
  -1   9  -9 2642.52 112.514  40
   9   1   9 2827.27 140.600  15
  -3  -9  -9 6590.70 143.457  31
   9   9  -3 8289.45 240.991  12
  -3  -9   9 8669.54 189.949  37
   3   9   9 8905.73 201.124  30
  -3   9  -9 9160.00 210.071  39
  -9  -3   9 5835.69 209.153  18
   9  -9   3 9312.72 198.629  22
   9   9   3 5950.41 250.123  12
   3   9  -9 9466.57 218.090  29
   9   3  -9 9334.13 205.311  29
  -9   9  -3 8975.29 219.294  17
  -3   9  -9 8548.86 198.215  28
  -3   9   9 12169.6 247.381  17
  -9   3   9 9914.76 175.395  20
   9  -9   3 9278.93 201.861  27
   3  -9   9 9083.88 185.282  27
  -9  -9   3 10358.6 237.322  11
  -9  -3   9 9861.03 181.119  42
  -9  -9   3 9321.20 176.998  27
  -9   9  -3 8267.03 187.456  26
   9   9  -3 11991.9 257.076  34
  -9  -9  -3 8180.62 168.088  27
   3  -9  -9 9703.66 233.715  16
  -3  -9   9 11452.5 269.902  11
   9  -9  -3 9123.95 192.905  33
   9  -9  -3 7963.07 217.205  16
  -9  -3   9 5943.08 211.895  11
  -9   3   9 9988.30 187.890  26
   9  -9   3 10181.6 229.028  24
  -9   9   3 11503.1 205.831  26
   9  -3   9 8944.17 199.352  22
   9  -9   3 7494.47 215.723  16
   9   3  -9 9907.37 225.549  34
   3  -9   9 9943.88 244.725  16
  -9   3  -9 7306.68 182.006  26
   3   9   9 8902.93 192.470  23
   9  -9   3 7808.28 217.026  14
  -9  -3   9 10180.5 194.042  20
   9   9   3 8831.57 235.062  25
   9  -9  -3 8081.58 216.996  14
   9  -3  -9 9113.78 216.151  25
   9   3   9 9824.53 208.068  30
   9  -3   9 10820.5 263.259  15
   9  -3   9 12759.9 256.425  24
   9   3   9 6987.68 216.190  15
  -9  -9   3 9288.96 184.993  36
  -9   9   3 9123.93 188.307  39
   9   9   3 9647.00 221.210  23
  -3  -9   9 9554.43 195.727  36
   9  -3  -9 10038.5 232.489  41
   3  -9  -9 9572.96 232.033  14
   3  -9   9 8631.06 191.572  37
  -3  -9   9 9020.13 187.821  42
   3   9  -9 9063.27 212.180  40
  -3   9   9 9673.41 184.871  39
   3  -9   9 9316.67 180.527  38
   3   9   9 8799.31 165.325  22
   9   9  -3 10583.6 214.047  41
  -3   9   9 10670.2 206.950  23
  -9  -9   3 10019.6 233.938  18
   3  -9   9 9724.60 240.323  14
  -3  -9   9 11044.8 264.012  18
  -3  -9   9 8805.86 173.789  35
   9  -3   9 9043.69 205.095  38
  -9  -9  -3 7063.65 156.372  38
  -9  -3   9 9188.44 174.594  37
  -3   9   9 9982.32 200.604  28
   9   3   9 10265.4 190.404  32
  -9  -9   3 9291.57 187.924  37
  -9   3   9 10203.6 191.301  21
   3  -9   9 8285.99 193.371  36
  -9   9  -3 8389.29 189.271  21
   3  -9   9 9488.77 231.945  13
  -9   3  -9 7296.03 179.886  21
  -9  -9  -3 8219.69 180.320  36
  -9   9   3 11651.3 207.004  21
   9  -9  -3 9148.19 182.568  31
  -9   3   9 9671.88 187.718  35
  -3   9   9 10155.2 184.274  35
  -9   9   3 8226.88 182.533  35
   9   9   3 6431.65 206.224  34
  -9   3   9 8065.94 206.547  13
   9  -3  -9 9460.10 226.281  34
   3  -9  -9 7150.46 173.513  34
   9  -9   3 7551.65 221.639  13
   3  -9  -9 7682.10 186.549  41
   3   9  -9 9675.03 235.956  19
   9  -9   3 9300.04 189.457  38
   3  -9  -9 9238.76 185.714  33
   9   3  -9 9320.97 255.230  19
   9   3   9 8718.49 193.425  22
   9   9   3 10897.4 208.101  22
   9  -3   9 11756.8 211.502  32
  -3   9  -9 9569.81 252.092  12
  -9   9  -3 8349.22 194.157  39
  -9   9  -3 7818.56 182.699  12
  -3   9   9 9435.74 190.856  32
  -9   3   9 10550.6 192.120  32
  -9   9   3 8793.70 194.523  32
   9  -9  -3 10288.4 211.232  41
   9  -3   9 8712.22 175.100  31
   3   9  -9 9697.28 211.447  28
   9  -9   3 9183.91 189.362  31
   9  -9  -5 12466.7 255.521  41
  -9  -9   5 11508.8 256.385  18
  -9   5   9 11725.0 207.357  39
   9   5   9 10820.5 226.194  30
  -5  -9   9 12397.2 294.603  18
   9   9   5 10995.6 204.758  30
   9   9   5 6587.45 274.504  12
   5   9   9 10575.9 199.524  22
  -9   9   5 10797.1 211.466  35
   9   5  -9 10671.2 223.776  29
   9   9  -5 7747.48 250.982  19
   9   5   9 10694.7 220.650  22
  -5   9   9 11360.3 220.848  28
  -9   9   5 9366.97 241.513  17
  -5   9  -9 9077.81 205.087  28
  -5   9   9 14451.9 270.966  17
   5  -9   9 10339.6 207.867  27
   9  -5   9 10934.3 232.540  38
  -9  -9   5 11113.3 253.939  11
  -9  -9   5 11121.3 194.027  27
   9  -5  -9 9532.09 228.965  16
   5  -9  -9 10084.7 249.133  16
  -5  -9   9 12296.8 295.703  11
   9  -9  -5 9492.66 245.564  16
  -9  -5   9 8165.50 248.209  11
   9   9   5 10268.8 234.478  23
  -9   5   9 11614.7 207.584  26
  -9   9   5 12330.3 205.311  26
   9  -5   9 12608.1 289.468  15
  -9   5  -9 7879.19 197.359  21
   5   9  -9 10944.7 242.243  40
   9  -9   5 10329.3 254.955  16
  -9   9  -5 10454.7 232.601  26
  -9   5  -9 8003.73 201.514  26
   5  -9   9 11443.7 273.661  16
  -5   9  -9 9691.80 218.206  26
  -5  -9   9 10549.2 202.117  42
   9   9   5 9708.34 251.373  25
   9   9  -5 11432.4 270.466  25
   9   5  -9 11299.9 256.379  25
  -5   9   9 13104.0 237.757  23
   9  -9   5 10704.7 223.407  22
  -9   9  -5 10206.0 227.468  21
   9   9   5 12094.8 229.673  22
  -9  -5   9 10956.0 206.118  37
  -5   9   9 11973.5 226.758  32
   9  -5   9 16082.4 293.763  24
   5  -9   9 16728.4 261.700  24
  -9  -5   9 11044.7 203.523  42
  -9  -9   5 10830.0 190.467  42
   9   5   9 7946.61 229.315  15
   9  -9   5 11271.9 210.619  31
   9  -5  -9 9461.05 227.509  14
   5  -9  -9 9753.51 221.979  41
   5  -9   9 10253.5 203.984  38
   9  -9  -5 9489.40 244.893  14
   9   5  -9 9578.27 218.283  40
  -9  -5   9 11429.9 209.616  20
  -5   9   9 11953.6 214.777  35
  -9   9  -5 9339.34 209.968  39
  -9   5  -9 7908.29 183.983  39
   5  -9   9 11386.7 270.706  14
   9   5   9 11496.6 201.897  32
   9  -9   5 10359.9 211.358  38
  -9   5   9 11723.1 209.938  21
  -5  -9   9 11393.5 208.381  36
  -9  -9   5 11840.9 219.928  37
  -9   9   5 12362.8 207.133  21
   9  -9   5 9303.81 250.719  13
  -5  -9   9 11254.5 217.272  37
   5  -9   9 10249.8 225.225  36
   5  -9  -9 10214.2 212.344  34
   5  -9   9 10800.6 262.243  13
  -9  -9   5 11137.5 202.312  36
  -5   9  -9 9112.70 210.052  21
  -9  -9  -5 8434.93 187.802  36
  -9   5   9 10211.2 245.025  13
  -9   5   9 10608.2 207.279  35
   9  -9   5 10486.1 254.875  14
   9  -9   5 10319.3 221.708  27
   9  -5  -9 10035.4 235.930  34
   9  -9  -5 11027.3 205.104  34
   9  -5   9 11535.9 256.716  13
   5  -9  -9 10014.6 247.581  14
   5  -9   9 11141.2 212.978  22
   9  -5  -9 9802.73 223.597  25
   5  -9  -9 11561.0 221.287  33
   5   9  -9 10489.0 277.772  19
  -9   9   5 11500.2 211.666  39
   5   9   9 10093.9 219.265  30
   9  -5   9 11024.7 226.595  22
   9   5  -9 10261.7 288.420  19
  -9   5  -9 11893.6 253.642  12
   5   9   9 9055.97 203.241  23
  -9   9  -5 9596.97 217.334  12
  -5   9  -9 9442.87 242.093  12
  -9   5   9 11167.9 214.946  32
  -9  -5   9 7856.01 242.843  18
  -9   9   5 11442.0 226.790  32
  -5   9   9 11768.3 215.459  39
   9  -5  -9 10670.1 247.339  41
  -9  -9   7 1805.23 129.374  18
   9   7   9 1490.47 92.1113  30
  -9  -7   9 1249.78 112.030  18
   9   9   7 1416.59 85.3181  30
   7   9   9 1376.15 89.7862  23
   7  -9   9 2305.10 111.747  24
  -9   9   7 1693.69 80.7617  21
  -9   9   7 1660.41 91.3233  32
   7   9  -9 1442.17 105.970  29
   9   7  -9 1450.03 101.458  29
  -9   7  -9 1491.02 98.6384  12
  -7   9   9 1686.32 87.3102  28
   9   9   7 1456.60 97.1898  23
  -9   7   9 1572.75 86.9562  32
   9  -9   7 1454.18 87.2626  38
   9  -7   9 1514.73 88.9265  27
   9  -7  -9 1253.35 109.883  14
  -9  -9   7 1545.88 78.0239  42
   7  -9   9 1527.05 88.2747  27
  -9   9   7 1172.02 96.7316  17
  -9  -9   7 1806.31 129.133  11
   9  -7  -9 1321.39 111.861  16
   7  -9  -9 1272.14 112.246  16
   9  -9  -7 1244.42 110.802  16
  -9  -7   9 1262.09 115.709  11
  -9   7   9 1583.56 79.2090  26
  -9   9   7 1624.91 78.6410  26
  -9   9  -7 1364.17 103.875  26
   9  -9   7 1499.14 111.252  16
  -7   9  -9 1395.30 102.891  26
   7  -9   9 1684.95 116.050  16
   9   9  -7 1442.74 102.053  29
   9   9  -7 1640.45 115.135  25
   7   9  -9 1597.35 109.098  25
   9   7  -9 1451.24 109.052  25
   9  -7  -9 1235.33 86.5106  25
   7  -9  -9 1472.79 88.7238  33
   9  -9  -7 1536.45 101.317  41
  -9  -7   9 1591.68 82.3123  42
   9  -9  -7 1352.55 88.0555  34
  -7   9  -9 1190.27 96.0449  21
  -9   7  -9 1207.73 91.3088  39
   7  -9   9 1423.44 90.3135  36
   9  -7  -9 1328.56 96.9074  41
   7  -9  -9 1483.12 99.5055  41
   9  -9  -7 1145.61 109.547  14
   7   9   9 1487.98 85.5239  22
  -9   7   9 1607.80 83.4366  39
   7   9  -9 1562.57 104.869  40
   9   7  -9 1528.58 99.4534  40
  -7  -9   9 1524.62 81.2932  42
   9   9  -7 1273.82 128.787  19
  -9   9   7 1752.19 87.7656  39
   9   7  -9 1492.79 137.730  19
   9  -9   7 1504.75 110.005  14
  -9   9  -7 1239.82 90.3612  39
  -7   9  -9 1242.09 97.8477  39
  -7  -9   9 1499.03 85.1042  37
   7  -9   9 1621.33 113.346  14
   9  -7   9 1545.78 92.1189  38
   7  -9   9 1436.58 88.5534  38
  -9   7   9 1614.71 81.0817  21
   9  -7   9 1494.94 88.3146  22
   7  -9   9 1707.80 92.5009  22
  -7   9  -9 1407.01 101.290  12
   9  -9   7 1470.32 89.0706  36
  -7   9   9 1608.48 85.8096  35
  -9  -7   9 1660.44 87.6006  37
   9  -9   7 1449.59 109.845  13
  -9  -9   7 1606.41 86.4395  37
  -9  -9   7 1577.90 78.5118  36
   7  -9   9 1639.54 111.849  13
  -7  -9   9 1592.78 80.3883  36
   9  -7   9 1600.81 108.544  13
  -9   9  -7 1298.39 101.280  21
   7   9  -9 1574.32 141.070  19
  -9   7   9 1392.39 78.3139  35
  -9   9   7 1634.06 87.3168  35
   7  -9  -9 1381.18 113.167  14
   9   7   9 1584.91 91.4445  22
   9  -9   7 2276.97 120.794  24
   9  -7  -9 1450.08 98.8331  34
   7  -9  -9 1435.57 91.9518  34
   9  -7  -9 1442.95 96.0150  33
   9  -9  -7 1454.75 90.2565  33
  -9  -7   9 1580.96 78.8991  20
  -9   9  -7 1370.27 95.2755  12
  -7   9   9 1670.63 92.4242  32
   9  -9   7 1835.73 86.7829  31
  -9  -9   9 5872.54 233.259  18
   9  -9   9 3008.39 123.586  27
   9   9  -9 3324.43 151.314  29
   9  -9   9 3468.03 161.275  14
  -9   9   9 3142.71 109.187  21
   9  -9   9 3032.99 127.507  38
  -9  -9   9 6106.44 240.067  11
  -9   9   9 3094.19 107.205  26
  -9  -9   9 4203.43 135.314  42
  -9   9  -9 2664.94 138.512  26
   9  -9   9 3551.86 164.950  16
   9   9   9 3056.08 126.297  22
   9   9  -9 3391.62 148.982  40
   9  -9  -9 2464.49 126.299  41
   9   9   9 2547.15 122.187  23
   9  -9  -9 2210.72 140.269  14
  -9   9  -9 2242.28 118.523  39
  -9   9   9 2996.48 114.884  39
   9   9   9 2924.53 128.701  30
   9  -9   9 2986.14 123.455  22
   9  -9  -9 2150.62 139.310  16
  -9  -9  -9 1942.85 96.4172  38
  -9  -9   9 4123.39 143.616  37
   9  -9   9 2931.98 128.169  36
   9  -9   9 2962.97 152.114  13
  -9   9   9 3247.38 121.628  35
  -9   9  -9 2526.13 135.206  21
   9  -9  -9 2673.58 124.211  34
   9  -9   9 4602.96 166.716  24
   9  -9  -9 2758.14 125.833  33
   9   9  -9 4854.11 238.637  19
  -9   9  -9 2300.47 127.910  12
   9   9  -9 4361.01 186.528  25
   0 -10   0-53.4656 56.9218  18
   0 -10   0 51.1378 22.2080  31
 -10   0   0 15.6519 50.4749  17
 -10   0   0-7.53278 30.4677  42
 -10   0   0 25.7947 26.8841   7
   0  10   0 594.284 59.0754  29
   0  10   0 11.2960 43.6343   2
   0   0  10 0.62223 18.9943   8
   0  10   0 862.287 75.2198  17
   0   0  10 53.9369 41.6068  24
   0  10   0 94.9271 42.3137  28
   0 -10   0 8.46491 17.9019  27
 -10   0   0-0.51482 17.8544   2
   0   0  10 12.4435 33.0329   6
   0 -10   0-47.0172 57.0855  11
   0 -10   0-64.0312 58.2915  16
   0   0  10 1120.05 89.2673  13
   0 -10   0 0.72332 35.3664   3
  10   0   0 320.414 103.124  15
   0   0  10-42.6113 70.7482  11
   0  10   0 6.72082 28.9579   5
   0   0  10 1.26057 25.0679  20
   0  10   0 76.9225 45.3319  40
   0 -10   0 358.934 37.2113  38
   0 -10   0-66.8917 58.5757  14
   0   0  10-33.5627 69.7675  18
   0  10   0 5.93985 29.2588  30
 -10   0   0-11.2371 39.6574  37
   0   0 -10 38.4973 31.4126  10
 -10   0   0 3.49182 22.4054  44
   0   0  10 424.287 38.0029  35
   0  10   0 115.083 55.3487  43
  10   0   0 202.466 58.5545  34
  10   0   0 1155.81 76.8239  33
   0 -10   0-39.7417 38.9457   4
   0   0  10 7.44659 25.1114  37
 -10   0   0-23.5003 41.9865  20
   0   0  10 260.683 32.9335  32
  10   0   0 20.4214 32.7766  41
  10   0   0-37.9600 55.3978   1
  10   0   0-76.5226 81.0014  19
  10   0   0 27.8801 46.3314  31
   0  10   0 41.6638 53.9334  12
   0   0 -10 1036.45 57.1077   1
  -2 -10   0 2960.03 76.8027  31
   2   0 -10 3268.52 100.012   1
   0 -10  -2 3096.40 101.953   3
  -2   0  10 2112.04 131.744  18
  -2  10   0 2687.38 96.3090   2
   0  10  -2 2838.60 105.269   2
   2 -10   0 2669.83 88.0853   3
   0  -2  10 2732.06 133.981  18
   0  10   2 3075.57 100.819  30
   2  10   0 3179.97 99.7883  30
  -2 -10   0 2825.85 100.301   3
   2   0  10 2687.13 130.844  18
   0   2  10 2408.22 139.940  18
  -2  10   0 2656.49 96.1439  30
   0  10  -2 2916.82 99.2384  30
   2  10   0 2866.12 129.658  43
  -2 -10   0 3359.42 89.8649  38
   0  10   2 2956.51 105.172  29
  -2  10   0 2849.28 97.6115  29
   0  10  -2 2995.24 105.854  29
 -10   2   0 2970.64 105.233  20
 -10  -2   0 3740.88 105.360  17
   0  10   2 2562.97 82.4553  23
 -10   0  -2 3630.84 109.183  17
   0   2 -10 2510.55 90.9294  29
  10  -2   0 2993.14 136.439  15
  -2  10   0 3124.26 97.1157  39
   0  -2 -10 3275.46 100.140   4
 -10   0   2 3478.57 101.200  17
 -10   2   0 2747.18 92.7042  44
 -10   2   0 3459.58 108.952  17
  -2  10   0 2958.91 103.906  40
   0  -2  10 2841.50 87.8927   8
   0 -10  -2 3375.94 115.549  11
   2  10   0 3083.28 117.090   2
   0  10   2 3123.25 101.016  28
   2  10   0 2845.38 96.8285  28
  -2  10   0 2854.02 99.3125  28
   0  10  -2 3081.72 106.296  28
 -10  -2   0 2706.74 86.0972  44
   2 -10   0 3075.96 101.779  11
  -2  10   0 2911.45 105.350  17
  -2 -10   0 3183.20 115.619  11
  10   0  -2 2829.98 88.9823   9
   0  10   2 3497.77 113.055   2
   0  10   2 2803.87 105.602  17
   0  -2  10 1892.00 94.9377   6
   0 -10   2 2899.06 104.680  11
   2   0  10 1971.74 102.630   6
   0   2  10 2057.92 93.4891   6
 -10   0   2 3252.73 96.9058  37
   2  10   0 2894.75 107.214  29
   0 -10   2 2985.35 86.4225  27
  -2 -10   0 2932.44 80.9685  27
  -2   0  10 2756.81 84.9157  37
  -2   0  10 2725.20 80.4519  26
   0 -10  -2 3189.35 118.152  16
   2 -10   0 3026.77 120.290  16
   0 -10   2 3095.90 115.732  16
   2 -10   0 3093.83 85.0313  38
 -10   0   2 3529.51 98.2217  26
   0  -2  10 3375.88 82.3760  24
   0  -2  10 2838.69 136.404  11
 -10   2   0 2829.63 94.9328  26
  -2   0  10 2196.97 134.703  11
   0  -2  10 2921.82 80.3557  35
   0  -2  10 2513.93 99.1693  13
   2   0  10 2883.25 135.733  11
   0   2  10 2528.45 141.713  11
  -2  10   0 2372.31 99.1019   5
   0  -2  10 2945.31 96.0548  37
   0  10   2 2683.04 98.3318  25
   0  -2  10 2216.99 101.824  16
   2  10   0 2993.87 105.775  25
   0  10   2 2747.08 103.835   5
   0  -2  10 2575.43 80.4509  42
   2  10   0 2873.51 87.2161  22
  10   0  -2 2217.70 115.098   1
  10  -2   0 2783.07 95.9530  41
   2   0 -10 2895.85 101.473  25
  10   0  -2 2931.56 127.813  15
  10   0   2 3608.58 135.250  15
  -2   0  10 3166.41 80.2395  24
   0   2  10 2950.68 87.3131  24
  10   2   0 3231.75 104.672  33
 -10   0  -2 2688.09 90.4194  44
 -10   0   2 2666.23 85.5547  44
  -2  10   0 2613.27 94.7589  44
   0  10  -2 2438.53 91.6375  44
  -2  10   0 2371.87 113.241  43
   2   0 -10 2610.12 92.5963   4
   0  -2 -10 2726.25 91.0119  10
 -10  -2   0 2935.46 100.147  20
 -10   0  -2 2786.38 96.3986  42
   2 -10   0 2925.57 117.946  14
   2   0  10 3156.73 90.1669  24
   0  10   2 3179.26 105.602  40
   0 -10  -2 3249.23 118.915  14
   2  10   0 2986.82 103.680  40
  10   0   2 2614.32 91.0330  23
 -10   2   0 2539.73 89.1684  37
   0 -10  -2 3000.65 79.9609  38
   0 -10   2 2978.36 113.382  14
   0 -10   2 2768.90 96.8896   3
  10   0   2 2807.28 87.3186  41
  10   0   2 3487.59 99.3013  22
   2 -10   0 2802.81 81.0390  27
  -2 -10   0 3525.41 90.3549   7
 -10   0   2 3466.61 97.9616  21
   0 -10   2 2596.01 94.2649   4
   0  -2  10 2142.41 99.6962  14
  -2 -10   0 3234.65 84.5216  36
  10   0   2 2381.25 138.833  19
   2 -10   0 2490.07 97.2685   4
 -10   0  -2 2328.70 99.3678  37
  -2   0  10 2829.08 82.3540  21
  -2   0  10 2723.24 104.505  13
   0   2 -10 2878.58 99.3363   1
 -10  -2   0 2988.61 105.947  37
 -10   0  -2 2743.05 82.1809   2
  -2   0 -10 2930.05 92.3331   1
   0   2  10 2829.53 74.8672  35
   0   2  10 3125.27 86.6675   8
 -10   0  -2 2899.00 109.532  20
 -10   2   0 2808.11 94.7878  21
  10   2   0 2731.09 101.395  34
   0 -10   2 3239.94 85.7233  36
   2   0  10 3046.25 108.531  13
   2   0  10 2883.64 92.6005   8
   0   2  10 2472.93 78.7600  20
  -2   0  10 2972.91 83.1744  35
 -10   0   2 3255.23 101.308  20
   0 -10   2 2936.06 105.224  18
   0  -2  10 2638.13 86.1667  20
   2   0  10 2794.95 71.4056  35
   2   0 -10 3587.36 107.309  19
  10   0  -2 2966.55 105.352  41
  10   0   2 2732.86 88.3957  34
  10  -2   0 2349.10 85.7809  34
   0  10  -2 3100.77 120.017  12
  10   0   2 2966.91 100.820  33
  10   0  -2 3230.53 105.657  33
   0  10   2 3274.93 133.920  43
  -2   0  10 3084.37 80.6711   8
  10   2   0 3124.83 99.7173  41
   0 -10  -2 3400.13 116.741  18
  -2   0  10 2652.17 83.4426  20
  10   0  -2 2477.80 134.810  19
  10   2   0 2273.60 136.486  19
  10  -2   0 2682.20 136.339  19
   2   0  10 2778.23 84.6116  32
   0   2  10 2833.89 86.7433  32
  -2   0 -10 2736.63 93.3780  10
  -2   0  10 3025.02 84.7775  32
 -10  -2   0 3536.46 105.222   7
 -10   0  -2 3351.41 105.283   7
 -10   0   2 3643.19 112.068   7
  10   0   2 2648.75 91.7219  31
   0 -10  -2 2741.53 98.6097   4
  -2  10   0 3079.56 110.981  12
   0   2  10 2803.21 106.149  13
 -10   2   0 3119.34 104.130   7
  10  -2   0 2929.95 91.5419  31
 -10   2   0 2660.48 97.3883  42
   2 -10   0 3166.28 102.999  18
  -2 -10   0 3196.26 115.646  18
   2  10   0 3487.56 135.560  12
   2 -10   0 3413.77 88.9017  31
 -10  -2   0 3052.80 96.4771  42
   0  10   2 3965.30 130.292  12
   0 -10   2 3587.29 84.9267  31
  10   0  -2 3016.32 107.736  34
   2  10  -2 9529.66 188.518  40
  -2 -10  -2 8053.42 133.348  31
   2 -10  -2 9191.31 200.628  14
  10  -2   2 8738.69 165.473  38
  -2  -2  10 6550.32 209.646  18
  10  -2  -2 8323.03 156.686   9
  -2  10   2 8442.23 166.297  30
   2  10  -2 9990.83 169.901  30
  -2  10   2 8454.35 171.968  29
  -2  10  -2 8165.57 163.580  29
   2  10  -2 9134.01 191.164  29
  -2 -10   2 8660.87 175.498   3
   2   2 -10 7376.98 165.689  29
  -2  10   2 8057.43 163.655  44
 -10   2  -2 10369.2 190.203  17
  -2  10  -2 6973.60 159.106  44
 -10   2   2 9470.41 188.464  17
   2  10  -2 6834.81 201.716  43
   2  10   2 8887.43 164.343  28
   2  10  -2 8487.60 170.780  28
   2   2  10 8792.81 159.466   8
   2  10   2 8856.70 187.234  17
  -2  10   2 8653.31 188.744  17
   2  -2  10 5169.98 164.873   6
 -10   2  -2 8516.74 145.284   2
  -2 -10   2 9155.26 186.081  11
   2  10   2 8091.63 147.948  22
 -10  -2   2 10868.2 171.011  17
   2  10   2 8478.65 169.455  40
  10  -2  -2 8228.60 171.250  41
   2   2  10 5981.82 170.278   6
   2 -10   2 8369.42 148.629  27
   2  10   2 8855.12 191.417   2
  -2 -10   2 9478.94 150.761  27
  -2  -2  10 6773.13 171.381  14
  -2  -2  10 8065.57 141.335  26
  -2   2  10 7188.96 133.643  26
   2 -10  -2 9261.70 202.163  16
  10   2  -2 6239.85 187.968   1
   2 -10   2 8786.34 197.489  16
  10  -2  -2 8054.20 164.210  34
  10  -2   2 7153.55 229.974  19
  -2  -2  10 6514.05 210.455  11
 -10   2   2 9842.92 171.738  26
 -10   2  -2 7386.30 151.797  26
  -2  10   2 7633.41 141.327  23
   2  -2  10 6150.95 169.996  16
   2  10   2 8027.06 177.550  25
  -2  10   2 8201.84 179.746   5
  -2  -2  10 6825.97 173.093  16
  10  -2  -2 6818.18 186.973   1
   2  -2 -10 7642.91 161.317   4
  -2  -2 -10 9298.90 164.367   4
   2  10   2 9631.08 218.795  12
   2  -2  10 6045.61 167.486  14
 -10  -2  -2 8104.27 160.313  42
   2  10   2 6288.71 149.693   5
   2   2 -10 7974.76 164.513  25
   2 -10  -2 7750.21 168.984   4
   2  -2  10 7370.72 165.112  15
  10  -2  -2 6163.21 192.352  15
   2  -2  10 7830.67 155.063   8
  10  -2   2 9085.47 216.624  15
  -2   2  10 8544.55 143.894  24
  10   2   2 11310.2 217.526  15
 -10  -2   2 8033.71 147.805  44
 -10   2  -2 7863.46 162.549  44
  10   2  -2 9616.44 168.120   9
   2  -2  10 8951.14 148.773  24
  -2  10   2 8293.92 199.592  43
   2  10   2 8387.23 223.050  43
  -2  -2 -10 7544.54 158.654  10
   2  -2 -10 8602.97 155.890  10
   2   2  10 7864.41 173.813  13
 -10  -2   2 9601.60 170.420  42
 -10  -2   2 9403.33 176.155  37
   2  10   2 7588.00 149.014  23
   2 -10   2 8676.40 195.722  14
  -2   2  10 8439.84 142.782  35
  -2  10   2 9774.04 157.275  39
  10   2  -2 9197.83 179.496  23
  10   2   2 7837.88 161.592  23
 -10   2   2 8655.33 167.673  42
  -2  10  -2 8429.69 176.927  28
 -10   2   2 7671.20 151.551  44
  -2  10  -2 8828.83 164.705  39
   2  -2  10 7800.54 128.462  35
 -10  -2  -2 7164.83 147.046  44
  10   2   2 8278.61 165.592  33
  -2  -2  10 8151.60 137.435  42
  10  -2   2 8859.74 163.377  22
 -10   2   2 8848.88 163.720  20
   2 -10   2 9411.40 153.419  38
   2 -10  -2 8927.30 140.224  38
  -2 -10   2 9700.62 151.821  38
  -2 -10  -2 8745.46 144.771  38
  -2 -10  -2 9186.24 157.232   7
   2  -2  10 6809.29 166.208  13
   2  -2  10 7924.14 167.327  37
  -2  -2  10 8129.12 143.127  21
  10   2   2 7943.43 151.546  41
  -2   2  10 7307.11 135.862  21
  10   2   2 9556.56 169.461  22
   2 -10   2 7261.72 162.385   4
   2   2  10 9357.00 163.224  24
   2 -10  -2 9570.27 183.386  11
 -10   2   2 9948.74 173.120  21
   2  -2  10 7396.64 149.504  36
  -2   2 -10 8672.57 172.335   1
 -10   2  -2 7577.17 153.755  21
  -2  -2  10 8943.81 144.020   8
 -10  -2   2 10617.7 188.075   7
   2 -10  -2 9174.16 147.805  31
  -2  -2  10 7993.68 178.366  13
 -10  -2  -2 7549.49 172.790  37
  -2   2  10 7340.03 135.231  20
  -2  -2  10 7858.24 149.809  20
  -2  -2  10 8329.06 157.572  37
  -2   2  10 7484.64 177.678  13
  -2 -10   2 9863.74 156.711  36
  10  -2  -2 8212.77 169.646  33
  10   2   2 7647.03 158.174  34
 -10  -2   2 8406.58 164.443  20
  10   2  -2 8662.83 169.789  33
  10  -2   2 8206.24 165.366  33
   2   2 -10 10139.8 195.832  19
 -10  -2  -2 9012.81 186.152  20
   2 -10  -2 8371.94 137.424  33
  10   2  -2 7026.88 220.782  19
  10  -2  -2 7808.93 217.312  19
   2  -2  10 8448.55 144.762  32
  10   2   2 7065.83 228.462  19
   2   2  10 8053.68 146.795  32
 -10  -2  -2 9197.32 170.489   7
  -2   2  10 7912.42 148.268  32
  -2  10  -2 8230.80 191.369  12
  -2  10  -2 8465.31 180.250  40
  10   2   2 8600.69 160.951  31
 -10   2  -2 8731.60 168.617   7
  -2  10  -2 7318.66 167.805   2
  10  -2   2 7900.01 157.267  31
   2 -10  -2 9830.04 185.822  18
 -10   2   2 7042.11 161.968   7
   2   2 -10 8827.85 181.339   1
   2 -10  -2 8967.28 166.332   3
   2 -10   2 9815.87 145.317  31
  -2 -10   2 9730.25 135.014  31
  -2 -10   2 8955.80 185.418  18
  10  -4   0 9.60609 23.8712  31
   0 -10  -4-0.58025 19.0027  31
  -4 -10   0 28.9311 21.0749  31
  10   0   4 170.473 31.8162  30
 -10  -4   0 8.24760 26.0561  42
  10   0   4 11.2379 21.1915  22
   4  10   0 14.9752 51.4596  43
   0   4  10 17.4783 31.1990  13
   4   0  10 90.0252 28.9810  30
  -4 -10   0-8.06618 51.1614  18
   0 -10   4 13.7440 47.9810  18
 -10   0   4 19.6615 29.5992   7
 -10   4   0 12.4576 27.4263   7
 -10   0   4 1.14917 24.6824  37
   0  -4  10 67.0329 53.0344  18
 -10  -4   0 9.50084 18.4194  44
  -4   0  10 63.1875 69.6356  18
   0  10   4 30.6895 36.5404  29
   0 -10   4 4.00086 41.3374  16
   4  10   0 20.2003 43.8094  29
   0  10  -4 32.1244 39.0015  29
   0   4 -10-10.4133 35.3395  29
  -4   0 -10-3.87722 21.5567   1
   0  10   4 14.4487 30.3163  28
  -4  10   0 4.10667 34.6899  28
   0  10  -4-15.3087 43.7956  28
  10   0  -4-1.24090 48.7842   1
   0   4 -10 37.3577 32.5555  28
 -10   0  -4 13.4935 30.5756  17
 -10   4   0 80.5530 42.9629  17
   4 -10   0-3.55342 19.3627  38
  -4  10   0 15.9835 35.5653  17
   0  10   4 10.6459 30.4800  17
   0 -10   4 8.86930 29.9467   4
   4   0  10 44.3042 22.8609   8
   0 -10   4 13.5889 20.7994  38
   4 -10   0-1.28791 20.6948  27
 -10   0   4 89.0987 30.9924  42
   0 -10   4-3.29963 20.3761  27
  -4 -10   0 10.7883 25.0360   7
   0  -4  10-4.36635 34.5861   6
 -10  -4   0 66.1660 30.4988  36
   4   0  10 2.67139 39.8103   6
 -10   0  -4-20.1616 24.8568   2
 -10   4   0 211.443 50.8107  26
   0   4  10 14.2355 33.0987   6
  -4   0  10-5.08402 19.5848  26
 -10   0   4 20.0866 22.9595  26
   0  10   4 34.6697 35.0214  40
  10  -4   0-0.81257 37.7285  33
  -4 -10   0-2.01306 51.8550  11
   0 -10  -4 22.6644 41.4125   3
   0 -10   4-13.7831 47.7260  11
   4 -10   0-2.24855 55.5477  16
   4   0  10 130.811 27.9825  24
   4 -10   0-7.44372 41.9541   4
  -4 -10   0 23.8349 43.4864   3
   0  -4  10 13.2882 34.1907  16
   0  10  -4 25.3467 31.5406   2
   4  10   0 43.3934 43.6373  25
  10   4   0-3.65664 38.7385  25
   0 -10   4 3.03171 32.9696   3
   0  -4  10 69.2135 51.2655  11
  -4   0  10 65.4401 70.6235  11
   4   0 -10 47.3907 38.5871  25
  -4  10   0 33.4372 36.3296   5
   0  10   4 24.3130 30.7026   5
   0   4 -10-0.94873 28.9022   1
   4  10   0-15.1958 45.5223   2
 -10   0  -4 22.5995 26.6560  44
  -4  10   0 30.0204 27.8046  44
  10  -4   0 127.438 83.1131  15
   4  10   0 31.8737 27.9940  23
   0  -4  10 12.6341 25.5173  42
 -10   0  -4 168.038 41.9732  42
   0  -4  10 46.6786 27.3791  36
  10   4   0 39.5131 33.0440  41
   0  10   4 42.6553 45.8214  43
   0  10   4 23.5051 27.3527  23
  10   4   0 14.0429 29.1278  23
 -10   4   0 32.9467 25.8616  44
  -4  10   0 16.1444 34.3849  40
   0   4 -10 40.6362 30.2932  40
   0  -4  10 10.9211 33.3348  14
   4 -10   0 96.0798 26.4015  31
  -4  10   0 31.0817 40.5245  39
   0   4  10 6.94650 17.8804   8
  -4   0 -10-8.36030 27.8817  10
  10   0   4 17.1804 25.9903  23
  10   0  -4 3.47220 28.4279   9
   0 -10  -4 9.34013 20.8813  38
  10   0  -4 3.01280 66.4589  19
   4 -10   0 18.9225 56.9137  14
   4   0  10 102.236 34.3384  13
   0 -10   4-15.7459 44.0966  14
  -4 -10   0 4.83430 18.9736  27
   0   4  10 4.30909 22.4668  24
   0  -4  10 68.7446 30.4787  37
 -10   4   0 205.058 50.8713  21
  10  -4   0 54.1837 37.0928  41
   0  10  -4 37.5876 43.5689  12
   4   0 -10 3.16593 27.2810   4
  10   4   0 18.7451 71.9014  19
  -4   0  10 3.87450 18.4886  21
   4   0 -10 48.6965 29.5487   9
   0 -10   4 5.47368 20.9249  36
  -4 -10   0 9.89903 22.6150  36
  10   4   0 18.0205 42.4982  34
  -4  10   0-10.3766 46.3279  43
   0  -4 -10-0.79134 25.0281   4
   4   0 -10 16.3758 27.3067   1
   0  -4  10 89.8433 24.3249  35
  -4   0  10 11.8964 19.1117  35
   0   4  10 6.47083 16.9207  35
   0  -4  10 13.8683 20.9441   8
   0  -4  10 10.7523 24.2911  20
   4  10   0 28.8063 27.4013  30
  -4   0  10 8.10587 22.5643  20
   0  10  -4 152.930 43.8441  40
   4   0  10 72.7064 35.4259  15
 -10  -4   0 9.61151 34.2998  20
   0  10   4 12.1148 29.6414  30
 -10   0  -4-30.8588 49.1717  20
   0  -4  10 0.97602 26.4910  13
  -4   0  10 17.3016 28.2922  13
  10   4   0 88.4770 32.0251  33
  10   0   4-5.21032 27.3907  33
  10   0  -4 17.7322 35.6467  41
  10   0  -4 14.0408 31.8188  33
   4 -10   0 9.96598 23.3335  33
 -10   4   0 97.2011 41.5459  42
   4  10   0 7.61896 22.4529  22
   0   4  10 133.338 26.8337  32
 -10  -4   0 27.8113 38.1210  37
   0   4 -10 18.5171 33.5763  19
  10   0   4 38.2246 49.3177  15
   4  10   0-9.20892 38.1479  40
   4   0 -10 18.4960 34.3007  19
  10   0   4 13.7279 23.7233  31
   4   0  10 17.7637 21.6085  32
  10   4   0 11.2691 53.4693   1
 -10   4   0 99.3823 52.2954  20
  10   0   4-9.13039 72.6232  19
 -10   0   4 11.7420 23.3701  21
  10   2  -4 1204.51 102.279  19
  -2 -10  -4 1386.03 59.0473  31
 -10  -2  -4 1365.96 69.9263  42
   2   4 -10 1701.16 86.0693   1
  10  -4  -2 1470.11 78.9729  41
  10  -2  -4 1558.10 77.7839   9
   4  -2  10 1441.43 82.5448  15
  10  -2   4 1554.68 75.7700  38
   4  -2  10 1607.56 71.3411  30
   2  10   4 1777.21 100.164  12
   2   4  10 1568.48 70.2692  30
  -4  10   2 1525.06 77.8766  28
  -2  -4  10 1081.02 90.1420  18
   2  10   4 1639.43 78.1966  30
   4  10   2 1724.41 75.2931  30
  -2  10   4 1594.31 75.5677  30
   4  10  -2 1794.01 72.5398  30
  -4   2  10 1107.38 114.568  18
  -4  10   2 1368.31 71.2373  30
   2  10  -4 1459.85 87.7242   2
  10   4   2 1044.95 103.454  12
  -2   4  10 1195.47 121.005  18
  -2  10   4 1495.09 81.0458  29
 -10   2   4 1790.96 75.8137  21
   2 -10  -4 1585.19 95.0889  14
 -10  -2  -4 1592.66 77.4434  17
   2  -4  10 2023.40 75.9707  24
 -10  -4   2 1897.02 74.0033  17
  -2  10  -4 1633.34 85.5247  40
   2   4 -10 1595.79 83.4460  29
   2  -4  10 1338.36 68.4032   8
  10  -2  -4 1493.94 83.2883  41
 -10   2  -4 1961.62 87.5098  17
   4  10   2 1365.16 104.045  43
 -10   4  -2 1596.32 81.5834  17
 -10   2   4 1221.02 70.2590  17
 -10   4   2 1381.66 82.7056  17
   4   2  10 1675.58 74.4584  30
  -2 -10   4 1560.09 80.6083   3
   2  -4  10 1400.45 71.8472  36
   2  10   4 1650.47 74.5311  28
  -2 -10  -4 1905.49 100.901  11
 -10   4  -2 1527.03 76.0443  44
  -4  10  -2 1813.28 88.5779  28
   2  -4  10 1064.39 81.6950   6
  -2  10  -4 1651.00 88.4135  28
   4  10  -2 1414.46 87.8617   2
  10   4  -2 1745.28 82.8695  23
  10  -4   2 1541.06 72.1782  22
  -2  10   4 1684.44 89.5101  17
  -2  -4  10 1409.17 69.7382  37
   4  -2  10 1015.62 82.6551   6
  -2   4 -10 1405.20 73.3021  28
   4   2 -10 1817.64 87.1062   1
   2   4 -10 1526.24 79.2357  28
   4 -10   2 1694.35 80.6064  24
  10   4  -2 1847.77 84.9708  41
  -2   4  10 1536.25 87.1000  13
 -10   4   2 1641.96 73.1188  42
   2  10   4 1459.67 84.6882  17
  -4 -10   2 1917.16 71.6774  38
  -2  -4  10 1465.31 68.2303  20
   4  10   2 1689.89 90.2531  17
  10   4  -2 1857.77 81.3801   9
  10   4   2 1651.76 81.2364  23
  -4 -10  -2 1683.82 96.4350  11
   4 -10   2 1588.16 70.0044  27
   4   2  10 1077.26 79.5589   6
   2 -10   4 1568.61 69.3411  27
  10   2   4 1317.21 67.0270  23
  -4 -10  -2 1487.28 83.0616   3
  10   2  -4 1742.31 82.7784  41
  -2   4  10 1436.15 60.9417  35
  -4 -10   2 2060.46 73.7749  27
  -4 -10  -2 1630.92 63.3107  27
  -2  -4  10 1255.05 77.9750  14
  10   4  -2 1041.88 92.3417   1
   2 -10   4 1737.67 99.1551  14
   2 -10  -4 1645.74 96.8995  16
 -10  -2   4 1687.33 78.8724   7
  -4  -2  10 1581.71 64.2671  26
  -2   4  10 1196.55 55.6666  26
   4 -10  -2 1695.05 106.060  16
  -2  -4  10 1096.76 92.1898  11
   4 -10   2 1499.62 97.7023  16
 -10   2   4 1733.85 73.6223  26
   2 -10   4 1708.75 99.6313  16
 -10   4   2 1809.58 79.5755  26
 -10   4  -2 1434.38 76.7232  26
 -10   2  -4 1637.54 86.4173  26
  -4  -2  10 1512.88 79.8890  13
  -4   2  10 1120.88 116.373  11
   2  10  -4 1770.77 88.4021  28
  -2   4  10 1217.92 120.658  11
   2  10   4 1399.82 84.4864  25
   4  -2  10 1071.50 78.7980  16
  -2  -4  10 1428.59 83.0022  16
   4  10   2 2180.71 103.672  25
   4  10  -2 1624.27 88.7932  25
  10   4  -2 1283.95 76.1161  25
  -2  10   4 1513.19 82.6316   5
  10   2  -4 1474.80 78.4136  25
   4   2 -10 1504.93 84.7686  25
   4  -2 -10 1648.94 89.1744  25
  -4  10   2 1674.70 90.9182  17
   2  10   4 1044.26 67.2363   5
  -4 -10  -2 1708.76 97.6999  18
  10  -4   2 1636.46 115.292  15
  -2   4  10 1626.16 69.3212  24
   4   2  10 1485.89 70.0475   8
   2 -10  -4 1427.44 82.2232   4
   2   4  10 1708.57 75.3302  24
   4   2  10 1657.37 74.8690  24
 -10   4   2 1340.22 68.3624  44
  10   2   4 2034.42 103.604  15
   4  -2  10 1910.57 82.6963  24
  -4  10   2 1416.81 73.5029  44
  -2  10  -4 1174.38 68.1036  44
  10   2  -4 1717.29 91.8227  34
   4  10  -2 1284.63 96.4074  43
 -10  -2  -4 1394.11 66.4024   2
  -2  10   4 1537.42 90.4971  43
  -4  -2 -10 1147.30 67.8154  10
  -2  -4  10 1580.98 64.7934  35
   2  10  -4 1775.49 75.5174  30
   4 -10   2 1828.86 69.0987  31
 -10  -4  -2 1327.67 64.4516  44
  -2  -4 -10 1425.68 73.0542  10
   4 -10  -2 1813.19 69.7133  33
   4   2  10 1056.98 75.9577  15
  -4   2  10 1482.32 65.3855  39
   4  -2 -10 1387.29 72.7462   4
   2  10  -4 1808.42 93.6436  29
   2  -4 -10 1383.00 72.1094   4
   4  10   2 1498.51 73.0964  23
  -2  10  -4 1603.52 82.7554  39
  -2  10   4 1399.80 78.3122  40
   2  10   4 1579.93 76.8697  40
   2  10   4 1497.48 103.432  43
  10   2  -4 1776.12 81.5539   9
   4  10  -2 1753.27 88.4022  40
   2  10  -4 1788.92 91.8697  40
  10   2   4 1611.05 64.9954  30
   2   4  10 1683.36 71.8379   8
 -10   2  -4 1560.15 67.6826   2
 -10   4  -2 1425.26 80.5781  20
   4  -2 -10 1559.35 78.1495   9
   2  10   4 1556.30 66.2733  22
   4  -2  10 1016.54 77.8542  14
   4  10   2 1688.70 71.6880  22
  -2  10   4 1835.33 71.0683  39
  -4  10   2 1622.02 74.3530  39
  10  -4  -2 1557.20 72.4316   9
  10   4   2 1956.05 76.9705  22
  -2   4 -10 2074.08 91.1212   1
  -4 -10   2 1763.31 71.9874  36
  -4  10   2 1459.16 81.4333  40
  10  -4   2 1711.33 75.6739  38
  -4  10  -2 1445.59 74.8765  44
 -10   4  -2 1602.48 64.7674   2
  10  -4   2 1788.52 88.3722  24
   4 -10   2 1629.82 67.7387  38
   2 -10   4 1620.00 68.1598  38
  -4   2 -10 1530.76 75.5522   1
  -2 -10   4 1850.79 68.6748  38
   4 -10  -2 1344.44 85.5541   4
  -4  -2  10 1606.98 62.5907  42
  -4   2  10 1497.82 66.3686  32
  10  -2  -4 1538.52 84.4059  34
 -10  -2   4 1787.92 79.1185  20
   4  -2  10 1326.14 72.4947  36
   2  -4  10 1463.24 77.2041  37
  -4  -2  10 1667.08 70.0417  37
  -2  10  -4 1569.96 94.7195  12
  -2 -10  -4 1444.72 61.7176  38
  -2   4  10 1311.00 58.7177  21
   2   4 -10 1769.80 80.6998  40
   2  10   4 1442.45 71.9161  23
 -10  -2  -4 1283.42 83.9700  37
   2  10  -4 1722.14 84.4817   9
 -10  -4   2 1817.49 69.2122  44
   2 -10   4 1679.39 88.0769  13
   2   4  10 1243.57 85.3849   6
   4  10   2 1486.82 87.2346  29
 -10   4   2 1748.88 79.4774  21
 -10   4   2 1552.60 71.5217  20
   2 -10   4 1385.35 77.7415   4
   2 -10   4 1567.70 68.4492  36
 -10   4  -2 1433.06 77.0058  21
  -2 -10   4 1816.00 72.9325  36
  -4 -10  -2 1602.59 66.3104  38
  -4  10  -2 1622.23 82.0472  39
  -4 -10  -2 1375.61 62.6460  36
   4  -2  10 1455.79 70.9142   8
 -10  -4   2 1506.77 67.7056  36
   4  10   2 1646.14 106.452  12
   2   4 -10 1719.63 91.7948  19
  -2  -4  10 1531.48 80.4337  13
   2  -4  10 1342.48 58.5668  35
  10   4   2 1527.58 73.8948  41
  10   2  -4 1062.87 88.7197   1
  -4   2  10 1627.35 65.3254  20
  -4  -2  10 1623.17 70.4069  20
  -4   2  10 1634.42 67.9778  35
 -10   2   4 2064.15 78.6532  42
  -4   2  10 1461.43 85.3987  13
 -10  -2  -4 1409.48 68.5429  44
   4  10  -2 1571.83 91.3098  29
  10   4  -2 1196.86 116.887  19
  10   4   2 1409.30 119.510  19
  10   2   4 1621.36 79.4923  34
 -10   2   4 1691.06 74.3647  20
 -10  -4   2 1750.97 77.9678  20
  10   4   2 1380.86 81.0563  34
   4   2  10 1458.60 66.4739  32
  10   4  -2 1807.89 94.6583  34
  -2  -4  10 1719.84 68.0294   8
  10  -4  -2 1424.67 74.2638  34
 -10  -2  -4 1505.90 89.8752  20
  10   2   4 1837.39 80.4492  22
   4  -2 -10 1902.90 89.2098  34
 -10   2  -4 1364.33 85.4128  20
  -4  -2  10 1597.88 65.0079  21
   2  -4 -10 1532.87 76.6283  34
  -4 -10  -2 1732.12 72.6824   7
  10   4   2 1566.61 76.8180  33
  10   2   4 1324.92 70.0812  33
  -4  10  -2 1368.21 84.1399  12
  10   4  -2 1866.27 79.8553  33
  10  -2   4 1650.00 74.6429  33
   4 -10  -2 1683.15 105.169  14
  10  -4   2 1570.54 77.9238  33
   4  -2  10 1253.68 75.7628  13
  10  -2  -4 1475.13 80.5633  33
  10  -4  -2 1520.82 79.9339  33
   4   2 -10 1942.31 93.7070  19
 -10  -4  -2 1468.39 83.9223  37
   2 -10  -4 1498.71 64.4419  33
   4 -10   2 1528.85 98.5266  14
  10  -2  -4 1196.45 103.257  19
   4 -10   2 1285.56 80.5276   4
  -2  -4  10 1483.71 67.2118  42
   4  -2  10 1628.53 68.4805  32
 -10  -4  -2 1595.96 73.9455   7
  -4  10  -2 1186.51 70.5383   2
  10  -2   4 1491.51 73.8998  22
  -2 -10   4 1659.59 94.8467  18
 -10   2  -4 1518.70 83.3870  21
 -10  -2  -4 1591.82 73.1766   7
  10   2   4 1463.18 122.687  19
  10  -4   2 1574.52 118.992  19
  10  -2   4 1663.61 129.326  19
  -2   4  10 1305.32 64.8816  32
 -10  -2   4 1587.03 70.2493  37
  -2 -10   4 1785.68 97.2257  11
  -2  10  -4 1330.17 79.3752   2
 -10  -4   2 1821.48 77.5797   7
  -4  10  -2 1618.22 82.3484  40
  10   2   4 1440.87 71.3571  31
  10  -2   4 1477.43 74.5862  31
   2 -10  -4 1501.94 72.2001   3
  10  -4   2 1604.98 74.2100  31
   2  10  -4 1486.06 93.3665  12
  10  -4  -2 1513.02 70.1375  31
  -2 -10  -4 1804.93 99.4078  18
  -4  -2  10 1927.44 71.7455  35
  -2   4  10 1342.12 63.3703  39
  -2  10   4 1395.12 65.7018  23
 -10   2  -4 1612.30 75.3863  44
 -10   2   4 964.055 64.4768   7
   4 -10  -2 1584.27 64.3872  31
  -2 -10  -4 1615.20 84.4961   3
   4  10  -2 1763.33 108.550  12
 -10   4   2 1279.50 76.2853   7
   2 -10  -4 1579.36 65.4183  31
 -10  -4   2 1714.92 72.3279  42
   4 -10   4 101.948 29.1445  31
   4 -10  -4 18.9302 23.8932  31
   4   4  10 360.621 43.4279  30
 -10   4   4 123.147 36.8384  21
  -4 -10  -4 11.0884 55.7096  18
   4  10   4 12.8541 30.8983  30
 -10  -4  -4 129.263 32.0242  44
  -4 -10   4 229.064 60.4526  18
 -10  -4   4 44.7879 33.1544   7
  -4  10  -4 10.5412 44.0673  12
  -4  -4  10 11.6624 57.7783  18
 -10   4   4 27.1265 35.7144   7
  -4 -10   4 48.5502 23.8675  38
  -4   4  10 2.13979 82.2344  18
   4   4 -10 664.000 66.1234  29
  -4  10   4 49.5542 29.1440  23
   4  10   4-4.33400 43.4833  29
   4  10   4 14.8589 72.0911  12
   4  10  -4 306.746 53.1520   2
   4 -10   4 104.974 40.1841  24
   4  10  -4 36.7181 42.0644   9
  -4  -4  10 11.4757 29.1906  13
   4 -10   4 18.3216 25.0018   8
 -10   4   4 21.9649 30.4206  42
  -4  10   4 48.1516 32.5171  28
  -4  10  -4 49.5871 43.0029  28
   4  -4  10 40.5443 27.3825  24
  10   4   4 88.0400 37.5882  41
  -4   4 -10 35.2870 36.9028  28
   4   4 -10 21.7228 38.2996  28
 -10   4  -4 65.9174 35.0203  17
  -4   4  10 27.7729 23.3620  35
  -4  -4  10 145.689 27.6509  21
   4  10   4 127.732 41.8164  17
  -4  -4 -10 19.2437 27.0088  10
  10  -4  -4 258.261 42.9879   9
   4 -10   4 85.3451 27.9904  27
  -4 -10   4 25.9158 22.4859  27
  -4  -4  10 176.549 28.2117  26
  10  -4  -4 48.6989 42.7123  33
   4  -4 -10 3.85587 36.8654  34
  -4 -10   4 38.8759 25.2558  36
   4 -10   4 43.4995 26.4251  38
   4  -4  10 54.4568 47.6146   6
  -4 -10  -4 20.9322 26.1069   7
   4   4  10 40.9490 41.9854   6
  -4   4  10 22.3887 21.5361  26
 -10   4   4 124.839 35.3643  26
 -10   4  -4-0.94929 51.3094  26
  -4   4 -10 4.60184 27.1524   2
  -4 -10  -4 4.42729 56.0836  11
   4 -10  -4 19.1459 32.5634   3
 -10  -4   4 13.1860 26.0443  42
   4 -10  -4 12.4878 60.5207  16
  -4 -10   4 203.486 58.4867  11
  -4 -10  -4 5.71392 41.8979   3
   4 -10   4 84.8971 56.3678  16
  -4  10  -4 37.9462 36.6496   2
   4  -4  10 3.77780 40.8918  16
   4  10  -4 21.1714 61.2208  43
  -4  -4  10 62.1878 60.3472  11
   4  10   4 45.2008 48.2162  25
   4  10  -4 71.6534 49.7453  25
  10   4  -4 11.9827 45.4070  25
  -4 -10   4 159.957 44.7703   3
   4   4 -10 22.4116 43.6481  25
  -4  -4  10 20.3743 27.3783  37
  10   4   4 198.824 35.1724  22
  -4   4  10 29.8365 22.5027  39
  -4  10   4 39.0720 37.0253  40
   4   4  10 279.772 38.4342  24
  -4  -4  10 24.5034 42.8814   3
  -4  10  -4 32.9241 30.0022  44
  -4  10   4 44.0205 28.7744  44
   4   4  10 19.2675 23.4388  32
   4  10   4 27.5132 57.2902  43
  -4  -4  10 15.2237 21.2356  35
  10  -4   4-24.1314 58.9752  15
   4  10   4-9.90378 36.8550  23
   4 -10  -4 36.4036 34.4249   9
  -4  10   4 35.0338 25.8052  32
  10   4  -4-1.77328 28.5446  23
   4   4 -10 12.3133 32.6978  40
  10  -4   4 12.2833 24.7309  38
  -4  10   4 20.8561 30.0273  39
   4 -10   4 29.7875 39.7139   4
  -4  10  -4 35.8786 48.6906  39
  -4   4 -10 12.9390 37.7821  12
 -10   4  -4 184.331 30.9578   2
  -4  -4  10 70.1700 25.6355  42
  10  -4   4 19.0377 25.7403  22
  -4  10   4 40.8211 39.5237  17
   4  -4  10 3.72490 39.6930  14
 -10  -4   4 8.68793 30.9422  37
  10   4  -4 7.98398 32.9489  41
 -10   4   4 49.8091 37.9450  17
   4 -10  -4 21.3107 45.2397   4
  -4   4 -10 88.3952 32.2821   1
  -4   4  10 26.1944 22.9156  21
   4  -4  10 21.4822 30.5889  36
  -4   4  10 19.8366 24.1733  32
  10   4  -4 44.6968 48.6621  34
 -10   4  -4 31.4257 49.7413  21
 -10  -4  -4 499.876 64.7651  37
   4 -10   4 64.8178 55.7027  14
  -4 -10  -4 16.5191 26.9609  38
   4  -4  10 8.48962 21.9443   8
   4 -10   4 86.0267 49.7427  13
   4  -4  10 55.2238 25.2834  35
 -10   4  -4 7.96768 25.5149  44
   4 -10   4 143.417 29.8358  36
  -4  -4  10 112.788 29.4877  20
  -4   4  10-12.9270 81.8835  11
 -10  -4   4 3.91370 33.2942  20
  10  -4  -4 26.6135 44.6187  34
  10   4  -4-14.1423 58.5103   1
 -10   4   4 31.1137 32.0232  20
   4  10  -4 198.714 59.0394  40
   4  -4  10 26.4418 32.5028  13
   4   4 -10 77.9380 37.0235   1
 -10   4  -4 92.7641 53.0147  20
  10  -4   4 48.4207 38.0238  24
  10   4   4 86.9838 36.9617  23
  10   4  -4 29.2318 35.1930   9
  10  -4   4 21.2385 34.5625  33
   4 -10  -4 41.9776 28.6392  33
 -10  -4  -4 175.488 39.6795   7
  10   4   4 158.445 54.8962  34
  10   4   4 248.014 92.9036  19
  -4  10   4 28.4329 36.0500   5
   4   4 -10 41.4098 42.1826  19
  -4  10  -4 24.9608 39.2045  40
  10  -4   4 58.8338 73.0567  19
   4  10  -4 338.337 65.6882  12
   4 -10  -4 24.8906 63.6700  14
  10   0  -6 562.620 73.6470   1
   6  10   0 605.291 83.5232  12
  10   0   6 797.591 56.3940  30
   6   0  10 802.042 58.6082  30
  10   6   0 482.495 87.9131  12
   6  10   0 829.792 52.8846  30
   0  10   6 780.485 59.6215  30
  10   0   6 673.676 55.7768  22
   0  10   6 777.680 68.5595  29
   6 -10   0 476.636 63.5738   4
   6   0  10 747.269 56.3365   8
  -6 -10   0 721.070 70.6385   3
   0  10  -6 774.957 68.9820  29
   0   6 -10 720.015 64.8607  29
   0   6 -10 666.205 57.5119  40
   6   0 -10 650.264 68.8352  29
 -10   6   0 702.666 70.2318  17
   0  10   6 807.293 59.7469  28
   0   6 -10 872.258 75.8773  19
  -6  10   0 724.927 60.1930  28
  -6  10   0 707.653 67.6869  17
  10   0  -6 551.813 83.2612  19
   0 -10   6 553.489 52.9428   4
   0  10  -6 778.560 72.0595  28
  10   6   0 773.585 74.1322  34
   0   6 -10 795.509 65.3454  28
 -10   0   6 731.975 51.8307  42
  -6 -10   0 498.958 76.8826  11
   0  -6  10 685.073 56.8313  37
   6   0  10 485.849 68.0184   6
   6   0  10 569.568 63.4679  15
  -6 -10   0 784.788 50.0977  27
   0 -10   6 853.402 78.3973   6
   0   6  10 644.395 66.9178   6
  -6   0  10 741.922 50.8765  26
   6 -10   0 645.001 83.3156  16
 -10   0   6 876.470 53.6083  26
   6   0  10 795.367 55.4029  32
  -6   0  10 400.221 98.4953  11
  -6 -10   0 749.063 52.0221  36
 -10   6   0 715.730 58.4184  39
   0 -10   6 733.757 69.2302  16
   0  -6  10 687.686 67.5190  16
  -6 -10   0 742.586 51.0100  38
   6  10   0 705.387 78.4899  25
  -6   0  10 369.673 95.3148  18
  10   6   0 682.690 68.1102  25
   6 -10   0 703.607 85.0899  14
  10   0  -6 619.253 63.2143  25
   6   0 -10 715.772 74.3995  25
  10  -6   0 487.189 92.6372  15
   0  10   6 658.653 62.5687   5
   6  10   0 662.366 72.9394  29
   0   6  10 775.273 56.7783  24
   6   0  10 639.600 47.6828  22
 -10  -6   0 687.772 46.6692  44
  -6   0 -10 679.415 58.9271  10
 -10   6   0 681.966 55.5572  44
   6   0  10 695.150 53.8426  24
  10   0   6 972.664 84.1172  15
   6  10   0 558.245 77.2831  43
   0 -10   6 596.174 49.7738  42
 -10   0  -6 897.419 64.1654  17
  10  -6   0 661.891 67.3654  24
  10   6   0 867.558 65.5103  23
  -6  10   0 683.789 60.3830  40
  10   0  -6 849.884 71.5993  41
 -10  -6   0 715.302 57.2119  36
   0  -6  10 632.552 52.5741  42
   0   6  10 787.377 54.2912  23
   0  10   6 676.197 55.9112  23
   6 -10   0 702.965 51.6882  41
   6  10   0 822.125 59.7900  23
   0  -6 -10 646.068 56.0554   4
   6   0 -10 782.175 56.9250   4
  10   0  -6 715.644 66.2275   9
   0  10   6 596.917 60.7796  40
  -6   0  10 763.099 50.5894  35
   0  10  -6 825.446 71.4487  40
  -6   0  10 744.320 51.0164  20
  -6   0 -10 735.668 53.9200   1
  -6 -10   0 818.915 55.2344   7
   6   0 -10 648.840 60.2193   9
 -10   0  -6 753.212 54.2088  44
   6  10   0 854.423 56.7062  22
  -6   0  10 690.598 63.1587  13
   0 -10   6 753.905 70.2409  14
  -6  10   0 917.878 70.3547  39
   0  10  -6 639.399 65.8209   2
   0  -6  10 652.193 64.9786  14
   6 -10   0 757.903 49.8826  38
   0 -10   6 787.547 50.4027  38
   0   6  10 876.658 51.8069   8
  -6   0  10 740.773 51.0400  21
 -10  -6   0 861.322 66.5707  37
  10   6   0 547.094 80.5496   1
  10  -6   0 707.452 63.7666  33
   0  -6  10 700.173 54.4068  36
   0 -10   6 825.582 56.5234  36
   0  -6  10 1056.19 71.9103  13
   0  -6  10 609.155 49.9757  20
 -10   0   6 910.352 55.2532  21
   0  -6  10 869.982 56.2131   8
   0  -6  10 708.290 48.4922  35
 -10   0   6 781.978 58.2655  20
   0  10   6 665.444 74.7010  43
   6  10   0 704.222 72.9446  34
 -10   6   0 608.255 54.5261  42
 -10   6   0 881.176 67.3513  20
  10   0  -6 788.579 72.7499  34
   6   0 -10 740.385 71.3348  34
  10   6   0 853.408 60.4073  33
  10   0   6 679.836 50.6721  33
  10  -6   0 740.764 57.9757  41
   6 -10   0 806.805 53.4846  33
   0  -6 -10 803.401 61.5207   3
   6   0 -10 896.838 82.1206  19
  10   0   6 947.570 62.2355  32
  10   6   0 567.914 95.3913  19
   0   6  10 829.698 69.8627  13
 -10  -6   0 987.599 63.2227   7
   0   6 -10 867.226 69.3960   1
   0   6  10 598.147 47.9872  32
   0  10  -6 741.649 77.0606  12
  10   0   6 613.022 51.5194  31
   0 -10   6 761.847 51.9790  27
  10  -6   0 669.873 54.2309  31
 -10   0  -6 494.164 69.0199  20
 -10   0   6 402.333 47.3370   7
  -6 -10   0 660.163 80.9871  18
   0 -10  -6 625.808 44.9383  31
  -2 -10  -6 6404.54 132.693  31
  -6 -10   2 7910.98 208.975  18
   6  10  -2 7394.96 221.353  12
 -10   6   2 5899.15 163.309   7
   2  -6  10 6849.28 181.485  13
  -6  -2  10 8035.68 151.113  26
   6   2  10 8061.92 174.500  30
   6  10   2 6154.02 227.687  12
   2   6  10 7895.60 164.292  30
  -6  -2  10 3803.63 174.469  18
   2  10  -6 5757.67 169.409   2
   6  10   2 8485.22 163.806  30
   2  10   6 7544.58 169.481  30
   2   6 -10 8097.62 194.922   1
  -6   2  10 5308.94 225.128  18
  10   6   2 5047.17 208.998  12
  -2 -10   6 7203.05 147.342  42
  -6   2 -10 8804.07 186.815   1
 -10   2   6 4471.06 142.847   7
  10  -6   2 7800.31 167.632  38
  -2  10   6 7475.06 179.100  29
   2  10   6 7212.33 183.625  29
 -10  -2  -6 7713.35 163.979   2
  10  -2   6 7514.73 175.711  38
  -2   6  10 6867.43 138.176  35
   2 -10   6 8316.54 198.239  13
   2  10  -6 8400.05 197.990  29
   2   6  10 8778.51 171.589   8
   2 -10   6 7584.58 210.281   6
   2   6 -10 8013.68 185.986  29
   6   2 -10 7267.33 183.872  29
 -10   2  -6 8617.92 181.520  17
  -6 -10   2 7061.55 179.201   3
 -10   6  -2 7971.52 200.344  17
   2  10   6 7350.81 154.787  28
  10  -2  -6 7928.81 190.813  41
 -10   6   2 5931.53 173.903  17
   6  -2  10 7456.58 196.514  15
  -6  10   2 7586.74 166.512  28
   6 -10   2 8055.52 160.233  38
   2  -6  10 6556.91 191.465   6
  -6  10  -2 7787.65 189.251  17
  -6  10  -2 7061.65 163.384  28
  -6  10   2 6766.31 187.652  17
  -2  10  -6 7928.02 187.639  28
   2  10  -6 8257.11 185.962  28
  -2  10   6 7904.24 177.838  40
  -2   6 -10 6312.41 159.013  28
  -6 -10  -2 8024.56 201.673  11
   2   6 -10 8129.92 180.851  28
  -2  10   6 8909.00 211.120  17
   6  -2  10 5398.40 182.430   6
   2   6  10 7528.63 153.117  23
   2  10   6 6160.01 180.713  17
  -2 -10   6 8146.88 174.932   3
  -6 -10   2 7762.91 211.449  11
  10  -6   2 8086.91 182.934  27
   6 -10   2 7388.40 162.631  27
   2 -10   6 8124.38 165.755  27
  -2   6  10 6631.06 144.944  39
   6   2  10 5777.78 182.773   6
   6  -2 -10 6334.11 154.549   4
  -2 -10   6 9071.39 203.208  11
  -2 -10   6 8406.78 158.961  27
  -6  10   2 8061.53 163.206  32
  -6 -10   2 7977.76 152.787  27
  -6 -10  -2 7425.09 144.501  27
   6  10  -2 6204.38 185.089   2
  -6  -2  10 7904.43 146.323  42
 -10  -6   2 7829.92 154.321  27
   2 -10  -6 8298.43 198.591  16
   2   6  10 7014.45 197.843   6
  10   6  -2 4833.73 184.613   1
  -2   6  10 5770.94 121.690  26
  10   2   6 7981.65 172.395  22
  -2  -6  10 7081.68 204.245  11
  -6  -2  10 3559.53 172.775  11
   6 -10   2 6932.38 198.144  14
 -10   2   6 8517.52 162.833  26
   6 -10   2 7033.09 200.805  16
 -10   6   2 7632.51 166.936  26
  -2  -6  10 6404.57 170.541   3
   2 -10   6 8669.80 211.155  16
 -10   2  -6 6897.81 169.328  26
  10   6   2 7318.98 167.596  41
  -2  -6  10 7280.99 150.089  36
   6  -2  10 5555.17 167.775  14
   2  -6  10 7460.71 199.936  16
  -6  10   2 5606.77 156.814   5
  -2  -6  10 7201.81 183.193  16
   6  -2  10 5579.43 169.340  16
   6  10   2 7537.99 203.517  25
   6   2 -10 8861.60 202.353   1
  10   6   2 7422.33 178.384  25
  -6   2  10 7760.67 153.285  39
   6  10  -2 7493.96 203.470  25
  10   6  -2 7093.00 179.596  25
  10   2  -6 7995.74 182.732  25
  10  -2  -6 7580.86 165.688  25
   6   2 -10 7440.30 195.860  25
   6  -2 -10 7979.36 200.560  25
  -2  10   6 8027.19 186.027   5
   2  10  -6 8037.08 177.457   9
  10  -6   2 6548.41 216.840  15
   2   6  10 8188.96 172.660  24
   2  10   6 5016.73 151.525   5
 -10  -6  -2 7024.80 147.879  44
 -10  -6   2 7853.94 147.077  44
 -10   2  -6 7819.62 166.787  44
   2  -6  10 7501.57 199.383  14
  10  -2   6 8901.84 232.417  15
   6   2  10 7829.99 171.957  24
 -10   6  -2 7205.46 167.808  44
 -10   6   2 6563.94 154.973  44
  -6  10  -2 6787.02 165.670  44
  -6  10   2 6520.71 157.204  44
   6  -2  10 8982.77 195.017  24
   2  -6  10 10507.2 172.441  24
  -6  -2 -10 6034.58 152.419  10
   6  10   2 5633.06 197.108  43
  10  -2   6 10677.8 219.556  24
   2  10   6 6957.81 211.142  43
   6  -2 -10 8967.26 202.926  34
  -6   2 -10 9459.02 188.057   2
  -2  -6  10 7817.65 162.782  42
 -10  -2   6 8181.91 159.382  42
 -10  -6   2 7736.73 150.690  42
   6  -2  10 6738.17 160.810   8
  -2  10   6 8345.69 155.954  39
  -2 -10   6 8917.87 200.816  18
  10  -6   2 8097.31 172.398  22
  10  -6   2 7844.24 167.416  31
  -2  10   6 6811.06 153.468  23
  -2 -10   6 6267.56 140.100  35
   2  -6  10 7357.70 173.018  37
   2  10   6 7330.50 168.201  23
  10  -6  -2 7774.38 169.691  41
   6 -10  -2 7103.82 156.131  41
   6  10   2 8127.58 179.763  23
   6 -10   2 8435.62 187.027  24
   2 -10  -6 8219.02 197.577  14
  -6 -10  -2 8134.69 163.413   7
   2  -6 -10 7130.11 170.801   4
  -6  10   2 7423.93 174.998  40
  -6  10  -2 7207.22 166.958  40
  10   6  -2 8646.25 186.286  23
  10   2   6 7053.74 240.734  19
   2   6 -10 7552.94 172.765  40
  10  -6  -2 7415.39 170.749  33
   6  -2  10 6267.36 140.712  22
  -2   6  10 9712.94 176.944  23
 -10   6   2 7479.92 153.636  39
  10  -2  -6 8368.22 195.776   9
   6  -2 -10 8620.25 199.246   9
   6  10   2 8958.33 172.342  22
   2 -10   6 8776.98 210.941  14
  -6  10   2 7983.72 167.833  39
  -2  -6  10 7488.71 155.061  20
 -10   6  -2 7127.16 157.715  39
  -6  10  -2 7583.02 178.076  39
  10   6   2 9402.07 178.164  22
  -2  10  -6 8984.87 192.104  39
   2 -10  -6 7001.26 163.924   4
  -6   2 -10 5892.54 139.153  39
  -2   6 -10 6906.84 165.380  39
  10   2   6 7794.19 157.209  30
  -2  -6  10 8146.00 155.824   8
   6   2  10 7018.58 144.618  22
   6  -2  10 6063.90 145.793  38
  10  -2   6 7519.40 173.212  22
  -2  -6  10 7024.83 180.059  14
   2 -10   6 8410.42 162.676  38
  -2 -10   6 8953.87 174.427  36
  -2 -10   6 8742.58 151.023  38
   2 -10  -6 5305.73 147.819   9
   6 -10  -2 5779.28 153.367   9
  -6 -10  -2 7382.25 146.523  38
  -2  -6  10 7143.93 163.484  37
  -6  -2  10 8241.81 153.699  21
   6  10  -2 8974.27 199.641   9
  -6   2  10 7754.72 157.890  21
   2  10   6 7239.64 146.690  22
 -10  -2   6 8204.67 154.133  37
  10   2   6 9265.83 225.805  15
 -10  -6   2 7980.13 171.530  37
 -10  -6  -2 7863.42 180.966  37
 -10   2  -6 6511.88 163.376  21
  -6  -2  10 7628.86 149.496  37
   6 -10   2 5933.02 162.456   4
 -10   2   6 8516.42 163.827  21
 -10  -2  -6 7557.14 159.699  44
  10   6  -2 8847.61 186.421  41
   6   2  10 7025.07 161.815   8
  -6 -10  -2 7351.16 174.606   3
  10  -2  -6 7599.43 178.992  33
 -10   6   2 7803.80 169.132  21
   2  -6  10 7198.71 171.199  36
   2 -10   6 7610.48 164.565  36
  -6 -10   2 8074.47 160.968  36
  -6 -10  -2 7518.45 155.430  36
 -10  -6   2 7517.00 157.751  36
  -6 -10   2 8482.54 152.334  38
   6  -2  10 5505.36 158.403  13
  10   2  -6 8079.42 178.116  41
 -10   2  -6 7644.46 160.978   2
  -2  -6  10 8065.39 184.409  13
   2  -6  10 7430.86 151.379  35
  -2  -6  10 7435.18 147.148  35
  10   6   2 7892.43 184.692  23
  10   6  -2 8750.44 205.541  34
   2 -10   6 7125.34 172.391   4
   6  10   2 7350.79 183.799  29
  -6  -2  10 8165.26 153.729  35
  -6   2  10 8052.99 159.575  35
  -6   2  10 8288.52 153.414  20
  -6   2  10 7866.61 157.448  26
  -6  -2  10 7661.60 179.192  13
  -2  10   6 8004.71 154.569  35
 -10  -2   6 8073.75 163.148  20
 -10   2   6 8485.94 166.523  20
  -2   6 -10 8513.47 194.416   1
   6  10   2 7173.26 190.962  34
  -6   2  10 7165.54 187.103  13
   2 -10   6 7695.89 165.903   8
  10   6   2 7325.23 194.189  34
  -2   6  10 7918.83 200.306  13
   6 -10  -2 8777.04 160.879  33
  10   2  -6 8181.96 195.337  34
   6   2 -10 7945.85 182.141   9
 -10   6  -2 6721.67 161.451  20
  -2   6  10 5806.88 123.049  21
   6 -10  -2 6097.79 164.445   4
 -10  -2  -6 6553.92 173.917  20
 -10   2  -6 5450.02 162.059  20
  10   6   2 8418.81 179.474  33
  10   2   6 6602.67 149.449  33
 -10  -2  -6 7572.76 170.538  17
 -10   2   6 7999.25 145.426  42
  10  -6   2 7852.34 162.837  33
   2  -6 -10 7916.69 181.661   3
   2   6 -10 8425.36 211.850  19
   6   2 -10 8527.34 204.539  19
  -6  10  -2 5904.46 149.630   2
   2 -10  -6 7218.13 148.578  33
  -6  -2  10 8193.74 162.285  20
  -6   2 -10 10774.8 217.602  12
  10   2  -6 6540.30 207.089  19
  -2  -6 -10 8295.47 169.320   3
  10   2   6 9274.87 170.534  32
  10   6  -2 5423.81 216.249  19
 -10  -6  -2 7710.17 166.477   7
   6  -2  10 7788.26 156.148  32
  -2  10  -6 6516.29 177.872   2
  10   6   2 6845.64 227.554  19
  10   2  -6 8149.92 187.521   9
   2   6  10 6821.89 146.678  32
  -2   6 -10 8437.10 200.543  12
 -10  -6   2 8436.42 167.172   7
  -6   2  10 7737.63 156.295  32
  -2  10   6 7379.80 143.647  32
  10   2  -6 5996.50 188.078   1
  -6  10  -2 6342.62 167.875  12
   2 -10  -6 7462.82 160.050   3
  -2  10  -6 7494.71 207.971  12
  10  -2   6 7389.33 167.148  31
  -6   2  10 5307.18 226.883  11
   2  10  -6 6577.28 202.310  12
   6  10  -2 6865.04 189.543  29
  10  -6   2 7395.35 182.151  24
   6   2 -10 8462.45 165.311   4
  10  -6  -2 7889.60 162.348  31
  -2 -10  -6 8443.06 186.809   3
  -2  -6  10 6962.09 201.153  18
   6 -10   2 8247.08 158.445  31
 -10  -2   6 5658.55 140.145   7
   6 -10  -2 8259.62 156.152  31
  -2  10  -6 7932.42 183.757  40
  10  -2   6 6932.85 244.336  19
  -6 -10  -2 8300.40 202.138  18
   2 -10  -6 7554.06 144.459  31
  10   6  -4 1526.17 130.333  19
  -6 -10   4 2170.02 129.051  18
   4  -6  10 2591.36 126.196  14
  -4 -10   6 2961.86 127.062  18
 -10   4   6 2700.92 93.3970  20
  -6  10   4 2452.39 106.055  40
  10   4   6 2562.45 94.8824  30
   6  -4 -10 2710.45 117.771  34
   4   6  10 2567.69 102.743  30
  -4  -6  10 2285.44 128.932  18
  -6  -4  10 1370.66 119.787  18
   6  10   4 2506.61 98.4132  30
  -6   4  10 1848.41 153.159  18
  10   6   4 1714.92 147.484  12
   6 -10  -4 2310.73 98.3215  41
   4  10   6 2599.08 119.079  29
  10   6  -4 1606.60 120.691   1
   6  10   4 2465.92 113.449  29
   6   4  10 2486.80 89.4617  22
 -10   6   4 2225.80 94.5334  32
   4  10  -6 2782.65 123.329  29
   6 -10   4 1874.99 116.811   6
   4   6 -10 2621.96 117.120  29
   6   4 -10 2717.46 120.060  29
   6   4  10 2447.69 93.2696  32
 -10   6  -4 2792.98 120.693  17
  -4  10   6 2367.67 97.5665  28
  -6  10   4 2466.00 98.5811  28
  -4  10   6 2570.37 95.5451  39
 -10   6   4 1498.63 91.1706  17
  -4 -10  -6 2969.47 130.941  11
  -6  10   4 2726.91 100.311  39
  -6  10  -4 2429.43 105.149  28
  -4  10  -6 2338.50 108.081  28
   4  10  -6 2596.13 108.681  28
  -6 -10  -4 2727.19 126.837  11
   4  -6  10 2519.59 91.4143  38
  -4  10   6 3004.71 127.435  17
  -4   6 -10 2169.75 94.6601  28
   4   6 -10 2613.13 107.720  28
 -10  -6  -4 1791.45 86.8993  36
  -6   4  10 2510.04 92.1053  39
   6   4 -10 2504.63 101.310  28
  -4  10   6 2702.77 94.5925  32
  -6  10  -4 2386.24 114.922  12
  10  -6   4 2543.53 106.160  27
   4  10   6 2223.02 100.998  23
   6 -10   4 2476.23 98.2536  27
  -6 -10   4 2153.47 130.708  11
   4 -10   6 2534.98 98.6246  27
  -4  10  -6 2345.04 102.236  40
  -4 -10   6 2923.69 127.200  11
  -6 -10   4 2774.77 93.2550  27
 -10  -6   4 2557.01 89.0061  27
  -6  10   4 2621.86 94.7555  23
   4 -10  -6 2983.80 132.296  16
  -4  -6  10 2327.78 130.731  11
  -4   6  10 2415.44 83.6771  26
  -6   4  10 2768.91 94.7458  26
  -6  -4  10 1418.36 123.390  11
 -10   4   6 2521.90 94.6472  26
  10  -4  -6 2542.49 115.741  41
 -10   6   4 2650.25 95.5547  26
   6 -10   4 2438.30 131.205  16
  10   4  -6 2032.07 132.749  19
   4 -10   6 2838.08 134.571  16
   6 -10   4 2478.82 95.3960  38
 -10   6  -4 2567.10 114.513  26
  -6   4  10 1879.28 154.447  11
 -10   4  -6 2131.54 105.945  26
  -4  10   6 2831.39 100.818  23
   4  -6  10 2662.98 128.598  16
 -10  -6   4 2467.64 86.2535  36
   6  -4  10 2291.53 117.921  16
   4  10   6 2601.77 148.530  12
   6  10   4 2206.49 122.648  25
  -6  10   4 2128.99 99.4951   5
   6  10  -4 2726.27 129.306  25
  10   6  -4 2445.16 116.613  25
  10   4  -6 2594.25 105.123  41
  10   4  -6 2622.36 117.949  25
  -6  -4  10 2685.20 95.5170  20
   6   4 -10 2395.75 119.437  25
  -4  10   6 2344.09 103.270   5
   6  -4 -10 2546.86 118.609  25
  -4   6  10 2406.06 84.2307  21
   6 -10   4 2228.30 96.5283  22
  10  -6   4 2370.67 133.972  15
   4   6  10 2627.88 103.463  24
  -4   6  10 3263.15 110.558  23
   6   4  10 2653.24 103.682  24
  -6  10   4 2045.60 90.3826  44
   6  -4  10 3841.56 127.856  24
   4  -6  10 3534.59 113.034  24
  10   4   6 2189.15 90.5412  23
   6  -4  10 2490.97 117.334  15
  10  -4   6 3718.57 138.268  24
  10  -6   4 3378.37 128.808  24
  -6  -4  10 2718.65 93.5068  42
   6 -10   4 3048.15 116.149  24
 -10  -4   6 2407.38 91.0416  42
  -4  10  -6 2718.84 121.206  39
  10   4   6 2738.63 104.262  22
  10  -6  -4 2756.62 111.835  41
  10   6  -4 2888.75 112.100   9
 -10  -6   4 2651.08 102.294  37
   4 -10  -6 2908.62 131.212  14
  10  -4   6 2667.19 136.752  15
  10   6   4 2337.40 103.610  23
  10   6  -4 2929.52 107.809  23
  -6   4  10 2640.58 98.5934  32
   6  10  -4 2742.88 119.408  40
   6  -4  10 2219.04 116.096  14
   4  10   6 2266.25 98.8873  30
   4   6 -10 2573.07 109.602  40
  -6   4 -10 2025.33 91.2785  39
  -4   6 -10 2205.82 99.7572  39
   6 -10   4 2322.10 127.234  14
  10   6   4 2139.04 92.9202  41
   4 -10   6 2748.30 131.435  14
  10  -6  -4 2568.68 105.518   9
  10   6   4 2930.34 105.746  22
  -4 -10   6 2683.67 94.0411  37
   6  10  -4 2427.46 121.599  29
  10  -6   4 2522.73 101.646  38
   6  -4  10 2365.80 89.7078  22
  10  -4   6 2510.40 103.224  22
   4 -10   6 2561.36 96.0892  38
  10  -6   4 2630.02 106.885  22
  -6 -10   4 2633.49 81.5696  38
   4 -10   6 2301.39 96.6646  22
  -4 -10  -6 1958.57 78.9039  38
  -6 -10  -4 1975.45 80.0656  38
   4  -6  10 2424.06 104.875  37
   4 -10  -6 1963.41 91.8971  41
  -6  -4  10 2577.82 95.4016  37
  10   4  -6 2918.43 125.971  34
  -6 -10   4 2701.00 92.8528  37
  10  -4  -6 2523.45 108.674  33
 -10  -6  -4 2339.96 106.716  37
  10  -6   4 2455.55 119.050  13
   6 -10   4 2293.40 121.853  13
 -10   6  -4 2529.85 91.7058   2
   6  10   4 2725.94 100.241  22
 -10   4   6 2703.54 98.1473  21
 -10   6   4 2700.89 97.4224  21
  -6  10  -4 2432.86 109.986  39
  -4  -6  10 2481.84 92.6529  42
   6  -4  10 2341.68 107.061  36
   4 -10   6 2607.31 123.884  13
   4  -6  10 2303.32 104.361  36
  -4 -10   6 2472.07 86.3520  42
 -10  -4  -6 1914.74 102.024  37
  10  -6  -4 2261.96 96.8386  34
   6   4  10 2614.82 104.356  30
 -10   6  -4 2516.94 112.202  21
 -10   4  -6 2191.92 104.556  21
   6  -4  10 2323.67 110.438  13
  10   4   6 2242.53 105.002  34
  -6   4  10 2803.02 96.3334  21
   4 -10   6 2344.55 95.6232  36
   4  10  -6 2685.24 140.944  12
 -10  -4   6 2576.87 96.8413  37
   4  -6  10 2332.13 85.7406  35
  -4  -6  10 2370.06 84.6982  35
  -6  -4  10 2720.34 89.8741  35
   6  -4  10 2299.02 92.5696  38
  -4   6  10 2422.53 89.9327  35
 -10   4   6 2788.67 97.9457  35
  -4 -10   6 2737.22 91.8031  27
  10   6  -4 3009.39 112.174  41
 -10   6   4 2751.18 99.3264  35
 -10  -4   6 2578.74 94.7599  20
 -10  -6   4 2546.09 90.8248  42
  10   6  -4 2979.04 126.701  34
 -10   6  -4 2057.31 91.8173  39
  10   6   4 2248.72 116.902  34
  -6   4  10 2302.57 116.218  13
 -10   6   4 2666.95 95.6864  39
  -4   6  10 2914.50 130.997  13
  -4  -6  10 2622.29 94.4566  20
  10  -4  -6 2515.50 112.011  34
 -10   6  -4 1930.75 99.6930  20
 -10   4  -6 1725.23 100.327  20
   4  -6 -10 2534.19 106.158  34
   6  10   4 1924.99 146.243  12
  10   6   4 2580.80 103.730  33
  10   4   6 1967.31 89.7764  33
  -6  10  -4 2066.87 96.8945   2
  10  -6  -4 2511.44 105.927  33
   6  10   4 2505.39 107.440  23
   4   6 -10 2863.45 132.279  19
   6 -10  -4 2995.61 102.808  33
   6   4 -10 2763.82 132.194  19
   4 -10  -6 2586.67 95.0478  33
 -10   6  -4 2714.79 104.587  12
  -6   4 -10 3250.27 129.399  12
   6  -4  10 2996.98 99.3214  32
   4 -10   6 3499.97 107.831  24
   4   6  10 2271.76 87.6376  32
  -4   6 -10 2861.88 124.517  12
  10   4   6 2874.54 157.433  19
  -4   6  10 2308.98 94.2772  32
   4 -10  -6 2244.34 90.3178   3
  10  -4   6 2299.65 153.897  19
  -6  10   4 2799.70 100.765  32
 -10   4   6 2802.91 99.9742  32
   4  10   6 2586.44 94.4975  22
  10  -4   6 2636.24 102.566  31
  10  -6   4 2811.36 104.002  31
  -4 -10  -6 3065.29 131.953  18
   6 -10   4 3102.36 99.6071  31
  10  -4   6 2538.03 104.348  38
   4  10  -6 2916.66 123.884  40
   6 -10  -4 2619.96 89.7781  31
  -6 -10  -4 2668.38 125.489  18
   4 -10  -6 2401.95 83.0277  31
   6  10  -4 2495.40 137.467  12
  -4  10   6 2645.23 97.1718  35
 -10  -6   6 8339.39 230.929  18
   6   6  10 7403.47 182.073  30
   6  10   6 6850.56 172.735  30
   6  10   6 6265.84 243.987  12
   6  10   6 6427.01 179.320  29
   6   6  10 6954.15 157.863  32
   6  10  -6 8013.95 210.377  29
   6   6 -10 6961.63 189.585  29
   6 -10  -6 6507.31 175.316  41
 -10   6   6 8048.06 167.467  39
   6 -10   6 6771.26 172.288  22
  -6  10   6 7490.29 171.534  28
 -10   6   6 5319.58 160.511  17
  -6 -10  -6 6898.63 192.049  11
  -6  10  -6 6442.64 170.310  28
  -6  10   6 7824.59 212.340  17
  -6   6  10 7819.93 169.502  39
   6  -6  10 7090.27 162.302  27
 -10  -6   6 7465.03 160.724  42
  10   6  -6 6116.60 223.751  19
  10   6   6 8309.59 188.884  22
  -6 -10   6 7997.53 159.946  27
   6  -6 -10 6807.10 203.196  16
 -10  -6   6 8330.15 232.439  11
  -6   6  10 7798.46 161.802  26
 -10   6   6 8042.96 167.887  26
   6 -10   6 7753.43 225.197  16
 -10   6  -6 6206.56 177.706  26
  -6  10  -6 7400.29 186.739  26
   6  -6  10 7947.62 225.311  16
   6  10   6 5867.86 190.987  25
   6  10  -6 8236.24 212.925  25
  10   6  -6 6501.59 189.949  25
   6   6 -10 7620.06 195.679  25
   6  -6 -10 7005.40 192.932  25
  10  -6   6 7796.30 229.617  15
   6  -6  10 10467.4 215.410  24
  -6  -6  10 8155.00 170.771  20
  10  -6   6 11512.6 250.991  24
   6 -10   6 10278.0 206.165  24
  -6 -10   6 7396.17 153.628  42
  -6 -10   6 7892.62 168.825  37
  10  -6   6 7384.90 183.234  38
  -6  10   6 8932.29 184.056  23
  -6  -6  10 7509.29 164.729  42
   6  -6 -10 7012.66 205.528  14
  10  -6  -6 7054.67 189.239  41
  10   6   6 6621.89 170.385  23
   6  -6  10 7891.33 223.330  14
  10   6  -6 8150.63 184.384  41
   6  -6  10 6910.28 196.804  13
 -10   6   6 7982.96 168.840  21
  -6  -6  10 7349.05 151.085  35
  -6  10   6 8288.77 177.692  39
   6  10   6 7763.94 175.143  22
   6  10  -6 8414.49 206.137  40
   6   6  10 7171.76 159.602  22
 -10   6  -6 5678.46 149.648  39
  -6  10  -6 6392.58 175.200  39
   6  -6  10 7487.75 173.264  38
   6  -6  10 7476.48 163.549  22
  10  -6   6 7104.29 178.804  22
  -6   6  10 8368.83 182.210  32
  -6  -6  10 7567.44 172.511  37
  -6 -10  -6 5527.27 138.479  38
   6 -10  -6 7770.49 159.684  31
  10   6   6 7175.43 162.299  30
 -10  -6   6 7946.15 162.032  20
  -6   6  10 8135.21 166.039  21
  10  -6   6 8045.78 208.396  13
   6  -6  10 7102.41 187.885  36
   6 -10   6 6824.04 168.034  36
 -10   6  -6 6210.31 174.994  21
  10   6  -6 8676.50 210.776  34
   6   6 -10 7693.26 195.408  40
  -6  10  -6 7188.89 182.754  21
 -10   6   6 8195.73 175.362  35
  -6  10   6 7024.55 165.877  35
   6 -10   6 7274.15 211.209  13
  10   6   6 6215.68 185.926  34
   6 -10   6 7601.68 221.535  14
  -6   6  10 7121.88 208.049  13
  10  -6  -6 6589.36 172.124  34
   6  -6 -10 7573.10 192.739  34
 -10   6  -6 4754.41 155.192  20
   6 -10  -6 7313.40 162.992  34
  -6   6  10 7734.03 168.272  35
  10  -6  -6 7264.66 183.896  33
   6 -10  -6 8369.55 183.688  33
   6   6 -10 8300.80 250.668  19
  -6 -10   6 8271.62 174.071  36
  -6   6 -10 5815.34 161.125  39
 -10   6  -6 7712.52 188.421  12
  -6   6 -10 8265.26 212.592  12
  -6  10  -6 6209.85 184.483  12
  -6  10   6 8871.78 186.706  32
 -10   6   6 7331.31 172.784  32
  10  -6   6 8097.00 177.855  31
  -6 -10  -6 6858.53 192.834  18
   6  10  -6 7859.06 233.612  12
  10   0   8 20.7868 26.6928  31
 -10   8   0 497.578 73.5272  21
  -8   0  10 339.388 39.6636  21
   8 -10   0 12.7389 28.7344  31
   0 -10  -8-4.23881 25.4375  31
  10   0   8 15.9059 34.5777  32
  -8 -10   0-5.39360 33.5185  36
 -10  -8   0 0.90453 34.7199  37
  10   0   8-3.69808 35.2692  30
   8   0  10 1.95983 33.7250  30
   0  10   8 34.2373 34.4806  30
  -8 -10   0 34.1112 62.0283  18
   0  10  -8 3.10962 55.0382  12
  -8   0  10 21.4298 83.6553  18
   8  10   0-15.1198 78.7392  12
   0   8 -10 1.98107 48.9403  29
  10   8   0-36.7203 83.5051  12
   8   0 -10 95.6348 54.2173  29
 -10   8   0 1244.63 93.1341  17
  10   0   8 9.68190 30.4596  22
   0 -10   8 345.384 45.9486  42
   0   8 -10-10.7147 49.4259  39
  10  -8   0 518.486 52.5507  31
   0  10   8 150.849 38.0629  28
   0  10  -8 8.89603 53.7502  28
 -10  -8   0 3.50781 30.1668  38
  10   0   8-4.74410 34.8433  24
  -8  10   0 5.42034 44.3032  17
   8   0  10 40.4265 30.0001  22
   0  10   8 131.028 47.8283  17
   0   8  10 19.2323 40.2825  17
   0 -10   8 18.6080 28.7978  27
  -8 -10   0 7.84817 24.8223  27
 -10  -8   0 13.5550 27.0631  27
  -8   0  10 291.034 37.4514  26
 -10   8   0 622.261 76.7712  26
 -10   0   8 10.7104 26.3700  26
  -8  10   0 25.1245 44.6644  26
   0   8  10 105.404 30.8997  32
   0  -8 -10 1.21094 59.2519  16
  -8 -10   0 34.1840 60.9438  11
   8 -10   0 268.033 76.1387  16
   0 -10   8 8.83289 43.0285  16
   0  -8  10 6.69163 42.3278  16
   8  10   0-4.28432 35.1953  23
   8 -10   0 244.906 74.1787  14
  10   8   0 150.192 61.3711  25
  10  -8   0 1329.06 135.410  15
  10   0  -8 7.81019 52.6231  25
  -8   0  10 28.0491 84.7246  11
  -8   0  10-4.00914 22.8057  35
   8   0  10-2.08189 28.1148  24
 -10   0   8 11.1592 26.8699  42
  10   0   8 1.59471 49.0517  15
  10   8   0 48.4986 43.5354  41
   0   8 -10 32.5844 51.2117  19
   0 -10   8 5.88750 27.7835  36
   0   8  10 4.36839 32.6614  23
   0  10   8 8.99917 35.4467  23
  10   8   0 5.71028 36.6383  23
   0  10  -8 69.5756 47.3379  40
  10   0  -8 22.5866 53.1057  34
 -10   8   0 601.402 68.6436  39
   0   8  10 10.9114 23.2963  39
   0  10  -8-4.76087 55.3871  39
   0  -8 -10-28.9652 61.9227  14
  -8 -10   0-0.74173 29.7009  38
  10  -8   0 376.349 78.3128  24
   8 -10   0 29.0200 30.4037  22
   0 -10   8 35.3291 31.5402  35
   0  -8  10 18.4792 39.8971  14
   0  -8  10 155.499 41.4169  13
   0  -8  10 19.7281 33.1347  37
   0 -10   8 53.8115 32.8718  37
   0  -8  10 26.2772 31.5494  36
 -10   0   8 3.10686 25.4802  21
  -8  10   0 5.22912 43.7237  21
   0   8 -10 10.1715 39.7070  40
   0  -8  10 19.3256 27.8403  35
   0  -8  10 6.84598 31.3754  42
  -8  10   0 1.03796 40.5671  39
   8  10   0 8.25847 62.1168  34
  -8   0  10 54.8672 28.2160  20
 -10   0   8 15.7612 28.7234  20
   8   0 -10 3.71019 54.7138  34
 -10   0  -8 38.1436 55.0440  20
  10   0  -8-2.38869 46.0122  41
  10  -8   0 536.566 62.9767  33
  -8   0  10-7.89389 40.6601  13
  10   8   0 1.43617 61.2691  34
   8 -10   0 16.3991 39.2903  33
   0 -10  -8 18.1936 28.6349  33
   8   0  10 262.777 40.6664  32
  10   0  -8 19.8207 68.1331  19
   8   0  10 19.7901 43.4893  15
   8   0 -10-39.7018 63.3630  19
   0  10  -8 73.4647 52.4879  29
   0  -8 -10 21.6432 29.3805  33
   0 -10   8 26.0748 45.3251  14
  -2 -10  -8 1071.87 60.0909  31
  -2  -8  10 1357.05 79.2203  37
   8  10  -2 1243.07 112.514  12
  10   2   8 1477.82 80.6646  30
  -2 -10   8 2164.85 124.966  18
  -2  -8  10 1555.47 111.920  18
  10   8  -2 1407.55 126.331  12
   8  10   2 1108.09 125.594  12
   2   8  10 1487.54 80.5368  30
   2  10   8 1526.22 85.2202  30
  -8  -2  10 851.876 100.867  18
  10  -2   8 1720.99 91.6317  22
  10  -8   2 1586.21 99.1786  24
  10   8   2 998.369 126.255  12
  -8   2  10 955.938 123.956  18
  -8 -10  -2 1356.08 75.7082  36
 -10   8  -2 1350.88 82.7894  39
   8  10  -2 1343.53 96.7280  29
   2  10  -8 1523.06 97.7873  29
   2  10   8 1410.85 68.5768  22
   2   8 -10 1423.15 91.6689  29
 -10  -2  -8 1386.10 81.1422  17
   8   2 -10 1338.21 94.3369  29
 -10  -2   8 1541.75 73.6141  42
   8   2  10 1069.29 92.9188  15
  -8  10   2 1419.18 81.2397  32
   2  10   8 1394.33 74.8600  28
 -10   8  -2 1351.17 93.9064  17
  -2  -8  10 1251.21 78.3066  42
  -8  10  -2 1272.28 91.4766  17
  -2  -8  10 1468.26 78.9686  36
  -8  10   2 1391.47 98.4585  17
  -2  10  -8 1451.02 93.1165  28
   2  10  -8 1472.57 95.5395  28
  -2   8 -10 1268.28 86.7395  28
   2   8 -10 1450.57 92.0596  28
  -2  10   8 1790.65 104.431  17
  -8 -10  -2 1753.74 108.630  11
   2  10   8 1229.12 92.5185  17
  10  -8   2 1478.91 85.8047  27
   2  -8  10 1411.34 90.8321  13
   8 -10   2 1443.74 80.1333  27
  -8 -10   2 1642.51 108.278  11
   2 -10   8 1486.61 95.9088  13
   2 -10   8 1430.02 76.8380  27
  -2   8  10 1318.52 70.3838  39
  -2 -10   8 1585.90 74.6386  27
  -2 -10   8 2183.62 126.311  11
   2  -8 -10 1878.67 114.366  16
  -8 -10  -2 1318.16 68.5886  27
 -10  -8   2 1459.08 73.1310  27
 -10  -8  -2 1279.20 69.9145  27
   2 -10  -8 1604.55 108.591  16
  -2  -8  10 1628.99 112.655  11
  -8  -2  10 1518.54 71.3577  26
   8 -10  -2 1334.14 108.749  16
  10  -8  -2 1222.02 102.702  16
 -10   2   8 1553.61 75.2779  26
  -8  -2  10 874.113 102.770  11
  -2   8 -10 1454.96 89.9819  39
   8 -10   2 1238.03 105.327  16
  -8  10   2 1799.25 85.4612  26
  10   8  -2 1671.67 107.228  34
 -10   8   2 1700.44 86.4679  26
  -8  10  -2 1540.40 86.9108  26
 -10   8  -2 1296.70 84.4700  26
  -8   2  10 931.012 125.678  11
   2 -10   8 1566.93 103.108  16
 -10   2  -8 1195.99 85.3936  26
   2  -8  10 1631.12 106.147  16
  -2  -8  10 1449.21 92.1643  16
   8  10   2 1339.21 108.997  25
  10   8   2 1362.38 103.511  25
   2   8 -10 1357.35 105.904  19
   8  10  -2 1548.79 111.068  25
  10   8  -2 1362.22 103.003  25
   2 -10   8 1555.51 75.3113  38
  10   2  -8 1494.35 99.4702  25
   8  10   2 1554.66 91.4359  23
   8   2 -10 1632.01 107.793  25
  10  -2  -8 1503.64 94.6677  25
   8  -2 -10 1479.44 102.895  25
  -2 -10   8 1590.83 79.0405  37
  -2 -10   8 1413.28 76.2794  42
  10  -8  -2 1089.21 122.282  15
  10  -8   2 1068.03 108.074  15
   2   8  10 1652.47 86.8518  24
  10  -8   2 1529.51 82.6796  22
  10   8   2 1661.55 95.4167  23
  10  -8  -2 1504.20 82.0882  41
   8   2  10 1609.06 85.7934  24
  10  -2   8 2060.53 123.851  15
   8  -2  10 1754.83 97.2643  24
  10  -2   8 2031.34 106.438  24
  -8  -2  10 1482.95 69.6527  42
 -10   2   8 1617.11 77.4002  21
   2   8 -10 1477.76 86.2813  39
   2 -10   8 1445.76 74.1234  22
 -10   2  -8 1165.59 83.5897  21
  -2   8  10 1714.53 85.5635  23
  10   8  -2 2020.45 99.3427  41
  10   2  -8 1709.20 91.7437  41
   8 -10   2 1415.42 73.9733  38
  -8  10   2 1799.74 85.2543  21
   2  10   8 1484.04 83.9683  23
  10  -2  -8 1433.91 97.4763  41
   2  -8 -10 1831.31 112.585  14
   2 -10  -8 1138.96 75.7099  41
  -8  10   2 1519.70 80.8019  39
  -8  10   2 1426.69 83.7201  40
  10   8  -2 1756.37 92.8220  23
   2 -10   8 1380.55 78.1824  36
   2 -10   8 1445.78 98.4721  14
   2 -10  -8 1547.82 106.858  14
   2  10  -8 1572.26 96.4685  40
   2   8 -10 1473.05 89.6831  40
   8   2  10 1577.22 86.9727  30
   8   2  10 1292.21 74.0191  22
   8 -10  -2 1567.77 83.9527  41
  -8   2  10 1546.17 72.9248  39
   8  10   2 1742.20 84.8840  22
 -10   8   2 1406.23 76.6134  39
  10   8   2 1798.81 85.2663  22
  -2  10  -8 1704.59 100.498  39
  10   2   8 1271.77 78.2232  22
 -10   2   8 1499.52 73.4563  20
   8 -10   2 1346.31 107.046  14
   8 -10   2 1386.50 79.2463  22
  -8 -10   2 1475.50 69.4047  38
  -8 -10  -2 1234.41 68.2091  38
   2  -8  10 1370.35 82.0279  37
  -8  -2  10 1424.87 68.7102  37
 -10  -2   8 1531.93 69.8274  37
  -8   2  10 1588.77 77.7028  21
 -10  -8   2 1519.08 81.5936  37
 -10  -8  -2 1522.84 86.8987  37
 -10   8   2 1633.58 85.6901  21
   8  10   2 979.595 96.8967  34
 -10  -2   8 1600.90 77.7577  20
  -8  10  -2 1527.64 87.8262  21
 -10   8  -2 1397.89 86.9249  21
  -2 -10   8 1628.87 84.4853  36
  -8   2  10 1562.76 76.5175  26
  -8 -10   2 1479.08 75.9491  36
 -10  -8   2 1536.80 81.2653  36
 -10  -8  -2 1314.50 77.6589  36
  10  -8  -2 1259.00 102.049  14
  -2 -10   8 1447.82 74.1981  35
  -2  -8  10 1439.56 73.2107  35
  -8  -2  10 1555.55 71.4733  35
  -8   2  10 1750.69 80.6036  35
 -10   2   8 1517.21 73.2731  35
  -8  -2  10 1790.83 81.4638  20
  -8   2  10 1536.03 72.2297  20
   2   8  10 1639.36 84.1534  23
 -10   8   2 1367.79 76.8700  35
   8 -10  -2 1300.83 106.736  14
   8  -2  10 1502.51 103.937  15
  10   8   2 1430.19 108.299  34
   2  -8  10 1597.07 105.002  14
  10  -2  -8 1360.77 95.8991  34
  -8   2  10 1444.77 94.5234  13
  -2  10  -8 1398.89 88.5041  40
  10   2  -8 1632.88 104.353  34
   8  -2 -10 1478.81 102.107  34
  10   2   8 1440.91 104.692  15
  -2   8  10 1632.53 103.924  13
  -2   8 -10 1281.56 99.8185  19
  10  -8   2 1549.25 80.5891  38
  10  -8  -2 1318.70 82.7683  33
   8 -10  -2 1481.06 80.0316  33
  -8  -2  10 1569.36 73.0327  21
   2  -8 -10 1302.13 71.9843  33
   2 -10  -8 1482.59 75.4657  33
   8   2 -10 1484.42 114.954  19
   2  -8  10 1250.92 79.1214  36
  10   2  -8 1386.28 116.973  19
  -8 -10   2 1558.35 105.758  18
  10  -2   8 1963.74 90.8463  32
  10   2   8 1660.29 82.0028  32
   8  -2  10 1705.82 81.6966  32
  10   8  -2 1082.57 124.909  19
   8   2  10 1583.22 77.4850  32
   8  -2  10 1185.20 73.2952  22
   2   8  10 1228.75 66.9894  32
  -2   8  10 1261.81 72.7803  32
  -2  10   8 1390.19 71.8890  32
  10   2   8 1467.27 128.676  19
  -2   8 -10 1540.20 109.496  12
  -2  10   8 1410.20 70.4232  39
  -2  10  -8 1619.78 112.462  12
  10  -2   8 1388.53 77.1132  31
   2  10  -8 1421.38 107.821  12
  10  -8   2 1401.62 78.6845  31
  -8  10  -2 1274.19 86.3699  39
  10  -8  -2 1498.74 78.2787  31
   8 -10   2 1533.44 78.5272  31
  -2  -8  10 1531.05 93.6634  14
   8 -10  -2 1483.61 75.9489  31
  -8 -10  -2 1703.17 107.689  18
  10  -4   8 50.9751 31.9957  31
  10  -8   4 43.4878 33.6638  31
   8 -10  -4 77.3706 31.8838  31
   4  -8 -10 117.618 66.8223  14
  -8   4  10 44.8279 49.4465  13
  -4 -10  -8 79.8236 62.2771  18
  10   4   8 104.130 39.2317  30
   4   8  10 151.696 40.9346  30
   8  10   4 98.1952 37.8888  30
   4  10   8 39.0864 35.0227  30
 -10   4  -8 58.0349 38.9126  12
  -8   4 -10 33.3762 40.7510  12
 -10   8  -4 104.548 41.8636  12
  -8 -10   4 136.063 61.3672  18
  -4   8 -10 81.7320 50.6853  12
 -10  -8   4 66.7519 54.5874  18
  -8  10  -4 99.7540 50.0578  12
  -4 -10   8 71.5149 64.9126  18
  -4  10  -8 49.0698 53.6404  12
  -4  -8  10 60.5596 62.6534  18
 -10  -4   8 53.5912 63.5396  18
  -8  -4  10 14.0470 65.8945  18
  -8  -4  10 44.1759 28.6538  42
  -8   4  10 23.1823 97.9131  18
  10   8   4 24.4005 68.0264  34
  -4   8  10 54.4333 28.2457  35
   8  10  -4 52.3826 63.9973  12
   8  10   4 89.8672 97.2550  12
   8  10  -4 53.6359 60.7104  29
   4  10  -8 91.1735 53.4635  29
   4   8 -10 67.8763 54.0669  29
   8   4 -10 47.2886 55.8942  29
  -8   4  10 62.3501 29.0499  39
  10   8   4 29.6749 103.490  12
   4  -8  10 60.7131 30.9971  24
  -4  10   8 79.8138 33.1434  28
  -4  10  -8 51.3401 52.6399  28
   4  10  -8 17.5880 52.1282  28
  -4   8 -10 51.3122 48.5820  28
   4   8 -10 31.5985 53.3335  28
 -10   8  -4 62.8941 46.4745  17
   8   4  10 74.9140 52.1999  15
 -10   8   4 16.7488 49.1936  17
  -8  10   4 76.0544 51.9974  17
  -4  10   8 91.6435 49.4548  17
  -4  10   8 103.284 37.6507  23
  10  -8   4 97.2514 34.4983  27
   8 -10   4 22.6761 31.7661  27
   4  -8  10 46.5912 32.9912  27
   4 -10   8 63.6594 33.6044  27
  -8 -10   4 44.0053 26.7778  27
 -10  -8   4 62.3273 30.3708  27
 -10  -8  -4 26.5861 30.5055  27
   4 -10   8 72.1870 45.4884  13
   8   4  10 139.745 41.6856  30
 -10   4   8 76.4681 29.5713  26
  -8   4  10 206.940 37.5337  32
  -4   8  10 83.2739 40.3616  23
 -10   8   4 55.1279 33.8082  26
 -10   8  -4 59.4825 60.3232  26
  -8  10  -4 58.6732 61.6614  26
 -10   4  -8 119.224 55.0119  26
  -4 -10  -8 64.5575 62.0314  11
  -8   4 -10 74.4559 49.5024  26
  -8 -10  -4 46.8023 35.0405  36
   8  -4 -10 93.0747 67.8554  16
   4  -8 -10 73.3904 63.8397  16
   4 -10  -8 180.950 75.1848  16
   8 -10  -4 23.9536 75.9227  16
  10  -8  -4 39.0510 69.0276  16
 -10   8   4 48.0388 35.8451  35
  -4  10   8 54.8466 31.5406  39
  -8 -10   4 75.1469 61.1672  11
 -10  -8   4 45.8387 51.7405  11
   8 -10   4 39.7211 63.6052  16
  -4 -10   8 67.7992 68.2498  11
  -4 -10   8 58.3169 31.2683  37
   4 -10   8 51.7424 50.3404  16
  -4  -8  10 69.6086 64.6007  11
 -10  -4   8 20.8021 59.5098  11
  -8  -4  10 51.2257 29.3771  37
   8  10   4 55.8461 62.8757  25
  10   8   4 114.488 71.7343  25
  -8  -4  10 73.1134 66.8362  11
   8  10  -4 49.3497 58.6543  25
  10   8  -4 58.8584 62.4546  25
  10   4  -8 39.2862 60.6862  25
   8   4 -10 62.1928 58.7575  25
  10  -4  -8 45.9120 50.3204  25
   8  -4 -10 47.0937 53.1428  25
   8  -4 -10 48.6443 51.5052  34
   8  -4  10 46.5020 35.1021  24
  10  -4   8 83.0052 40.9444  24
  10  -8   4 76.8845 47.7836  24
   8 -10   4 29.5534 47.2288  24
 -10  -8   4 64.7156 30.2581  42
  10  -8   4 63.4367 66.5104  15
   8   4 -10 90.2952 49.1889  40
  10  -4   8 21.4256 51.2724  15
  10   4  -8 87.0693 47.4935  40
   8  -4  10 84.2862 50.5211  15
   4  -8  10 42.1654 29.3523  38
  10  -8   4 64.1419 32.2599  38
  10   8  -4 67.6436 42.3699  41
   8 -10  -4 33.4918 74.6769  14
  10  -4  -8 63.2745 51.9915  41
 -10  -4   8 41.9137 29.1228  42
   8 -10  -4 91.2431 42.5946  41
   4 -10  -8 6.68522 39.4991  41
  -4  -8  10 53.5337 30.8877  36
  -8  10   4 81.6932 43.1948  40
   4   8  10 44.3763 39.2283  23
   8  10   4 89.9805 45.0560  23
   4  10  -8 36.6750 49.6026  40
  10   8  -4 65.5146 96.9516  19
   8  -4  10 48.8789 31.9282  38
  10   8   4 64.8604 34.6466  22
  -4   8  10 47.6022 28.4798  39
  -8  10   4 56.0090 34.5602  39
 -10   8  -4 49.0064 46.3990  39
  -4  10  -8 90.5628 62.7801  39
  -8   4 -10 62.2738 46.8126  39
   4  -8  10 78.3727 38.0606  37
   8  -4 -10 108.260 67.6065  14
  10  -8  -4 20.2025 42.2883  41
   8 -10   4 55.6026 64.6808  14
   4 -10  -8 187.181 73.3900  14
   8  10   4 65.3244 31.5165  22
  10  -8   4 25.8766 32.0715  22
   8   4  10 105.644 34.1874  22
   8 -10   4 73.1061 31.3031  38
   4 -10   8 42.1304 31.3293  38
  10  -8  -4 65.2678 71.0532  14
  10  -4   8 52.8237 35.1195  22
   8 -10   4 56.9740 33.4906  22
   4 -10   8 47.8746 34.6371  22
   4 -10   8 37.4303 48.6186  14
   4   8 -10 49.1816 46.3257  40
   4  10   8 83.9089 43.8094  23
  -4  -8  10 38.1255 31.9970  37
 -10  -4   8 36.4011 28.8233  37
  -8 -10   4 93.6890 33.3143  37
 -10  -8   4 63.6846 35.8628  37
  -8  10  -4 22.3622 48.4523  39
 -10  -4   8 118.440 34.5687  20
  -4   8  10 55.6728 30.0482  32
  -4 -10   8 72.3343 30.9115  27
 -10   4   8 102.053 31.8845  21
   4  -8  10 26.5649 37.1191  36
 -10   8   4 19.8022 34.7464  21
   4 -10   8 79.4081 36.1608  36
 -10   8  -4 41.6947 56.1988  21
  -4 -10   8 49.4408 31.3188  36
  -8 -10   4 175.991 37.4192  36
 -10  -8   4 130.669 37.3984  36
 -10  -8  -4 19.3960 37.1346  36
 -10   4   8 62.4346 30.6021  20
  -8  10  -4 38.4443 60.6042  21
 -10   4  -8 87.8798 54.1570  21
   4  10   8 109.556 34.3435  22
  -8   4 -10 22.3888 47.0801  21
   8 -10   4 64.6675 36.3015  31
  -8   4  10 2.33420 91.8729  11
  -4  -8  10 121.212 32.8323  35
  -8   4  10 36.3779 27.2894  35
 -10   4   8 51.7819 28.7933  35
  -4  10   8 77.3036 34.4264  35
  -8  10   4 53.7264 35.0748  35
  -4 -10   8 50.2019 28.4045  42
   8  -4  10 52.4298 33.7864  22
  10  -8   4 32.2721 59.4614  13
   8 -10   4 83.6221 60.0924  13
  -8  -4  10 121.933 33.6032  20
  10   8  -4 89.3849 58.3889  34
  10   4  -8 241.402 64.8013  34
   4  -8 -10 60.4929 39.2189  34
   4 -10  -8 32.1353 36.1465  34
  -8 -10  -4 43.2725 32.9072  38
   4  -8  10 68.9419 40.9876  13
   8  -4  10 50.8131 41.3924  13
  10   4   8 156.489 61.1269  15
  -4   8  10 82.2130 54.9533  13
 -10   4   8 50.2213 45.0808  13
  10  -4  -8 47.9959 49.0900  33
   8 -10  -4 31.0877 39.8701  33
   4  -8 -10 55.5941 36.8831  33
   4 -10  -8 60.6248 35.6863  33
 -10   8   4 36.6968 31.8668  39
   4   8 -10 166.531 68.6640  19
   8  -4  10 61.6518 36.7113  32
  10   4   8 98.2198 38.0775  32
   8   4 -10 64.2415 68.3281  19
   8   4  10 68.3482 32.1044  32
   4   8  10 44.0433 29.4179  32
  10   4  -8 58.7672 76.1397  19
  -4  10   8 43.8898 31.2958  32
 -10   4   8 71.2278 33.0861  32
  -8  10   4 58.9046 39.7081  32
  -4  -8  10 59.7447 31.0583  42
  -8 -10   6 453.879 74.0502  18
  -6 -10   8 557.750 90.1084  18
 -10  -8   6 554.259 86.0790  18
  10   6   8 496.312 57.2752  30
  10   6  -8 405.699 99.9905  19
 -10  -6   8 621.355 96.7218  18
   6   8  10 478.047 58.8128  30
   8  10   6 406.290 53.5855  30
   6  10   8 440.244 57.1886  30
  -8   6 -10 295.265 62.4688  21
 -10   6   8 575.304 57.2169  32
  -6  -8  10 354.430 81.5081  18
  -8  -6  10 393.947 78.8901  18
   6  -8 -10 431.328 59.6247  34
   8  10  -6 484.140 77.0642  29
 -10  -8   6 495.336 54.9253  37
   6  10  -8 508.798 78.0529  29
   6   8 -10 537.263 75.9904  29
   8   6 -10 442.002 74.2740  29
   6  -8  10 496.585 54.6791  38
  10   8   6 503.472 65.1720  23
 -10   6   8 526.953 52.1810  21
  -6  10   8 505.726 53.5434  28
   8  10   6 412.075 122.689  12
 -10   8   6 360.216 65.7646  17
  -6  10  -8 439.977 66.2594  28
  -8  10   6 337.818 66.2694  17
   8  -6  10 604.302 77.5926  14
  -6  10   8 615.607 74.5325  17
 -10   8   6 466.659 50.3979  39
  10  -8   6 465.392 57.2912  27
   6 -10   8 496.649 57.1981  22
   6  -8  10 495.135 54.9803  27
   8 -10   6 549.136 58.8068  27
   6 -10   8 501.277 55.9789  27
  -8 -10   6 492.660 74.9422  11
  -8 -10   6 484.092 46.9987  27
 -10  -8   6 473.294 46.1578  27
  -6 -10   8 635.758 93.4907  11
 -10  -8   6 613.228 87.9895  11
   8  -6 -10 537.737 89.2678  16
 -10  -6   8 622.541 96.4706  11
  -6   8  10 617.615 50.5211  26
  -8   6  10 548.996 51.8172  26
 -10   6   8 529.764 51.4309  26
   6   8 -10 458.189 69.3684  40
 -10   8   6 534.486 53.6558  26
  -8  -6  10 496.126 49.7413  20
 -10  -8  -6 363.654 52.4888  36
   8 -10   6 469.431 84.8061  16
 -10   8  -6 437.117 75.5191  26
  -8  10  -6 396.209 77.7105  26
   6 -10   8 503.208 77.7731  16
  -6  10  -8 455.692 77.4309  26
  -8   6 -10 352.597 65.1681  26
  -6   8 -10 488.930 74.4506  26
   6  -8  10 525.030 78.6607  16
   8  -6  10 532.787 74.0655  16
 -10   6  -8 329.067 69.7410  26
  -8 -10   6 505.115 52.0690  37
  -8 -10   6 436.633 45.1367  42
   8  10  -6 516.324 82.6939  25
   6  10  -8 522.728 78.8798  25
  10  -8  -6 395.334 85.9832  16
   8 -10  -6 381.583 87.3939  16
   6   8 -10 446.855 71.4875  25
   8   6 -10 547.445 80.7088  25
 -10  -6   8 466.705 49.0279  42
   8  -6 -10 455.708 70.1313  25
  -6  -8  10 359.998 82.6502  11
  -8  -6  10 301.898 75.9121  11
   8  10   6 367.483 78.3914  25
  10  -8   6 415.655 80.7576  15
  10  -6   8 550.452 80.7071  15
   8  -6  10 782.548 71.6673  24
   6  -8  10 784.035 68.2259  24
  -6  10   8 533.702 56.0028  35
  10  -6   8 669.444 72.0075  24
   6 -10   8 771.571 68.7325  24
  10  -8   6 604.326 69.8989  24
  -8  -6  10 540.971 51.9101  42
   8 -10   6 471.271 81.6197  14
  -6  10   8 525.473 58.3495  23
  10   8   6 547.450 56.1454  30
   6   8  10 546.589 60.8848  23
   8  -6 -10 492.090 72.6995  41
  10  -8  -6 414.429 63.1851  41
   8  -6 -10 396.779 83.6928  14
   6 -10  -8 392.482 59.9437  41
   8  10   6 502.858 66.4923  23
  10   6   8 475.108 58.4703  23
   6  10   8 405.665 60.3256  23
   6  10  -8 478.478 73.6842  40
  -6 -10   8 466.710 49.0386  42
  -8   6  10 558.986 53.4842  39
 -10   6   8 532.724 51.7357  39
  -8  10   6 502.441 54.9219  39
   6  10   8 457.385 52.3186  22
   8  10   6 634.343 60.5457  22
   6   8  10 438.047 50.3969  22
  10   8   6 546.209 58.5574  22
   8   6  10 455.279 54.2062  22
   6 -10   8 504.656 78.1308  14
 -10   6  -8 317.468 60.1210  39
  -8   6 -10 371.865 64.7509  39
  -6   8 -10 425.784 69.7510  39
   6  -8  10 558.383 78.1758  14
  -8  10  -6 340.699 65.1324  39
  -6  10   8 510.623 52.3298  39
   8  -6  10 401.755 52.7558  38
  10  -8   6 500.761 56.2713  38
   8 -10   6 443.574 50.6636  38
   6 -10   8 438.274 51.6498  38
   8  -6  10 482.219 53.8983  22
  10  -6   8 424.581 54.6640  22
  10  -8   6 494.088 56.7399  22
  10  -8  -6 365.637 84.0155  14
   8 -10  -6 397.166 86.6147  14
  -6  -8  10 440.987 52.0782  37
  -6 -10   8 554.146 54.4719  37
  -8  -6  10 483.594 52.8437  37
 -10  -6   8 514.010 53.4464  37
  -6   8  10 642.927 52.4086  21
  -8   6  10 599.013 54.4840  21
 -10   6  -8 401.387 69.3608  21
 -10   8   6 523.135 54.2848  21
  10  -8   6 428.758 73.4491  13
   8  -6  10 471.582 60.4871  36
   6  -8  10 435.727 57.7368  36
   6 -10   8 452.386 56.2267  36
   6 -10   8 424.984 66.3014  13
  10  -6   8 499.492 69.8167  13
  -6 -10   8 490.583 52.5616  36
 -10   8  -6 448.803 75.8398  21
  -8  10  -6 424.360 75.6584  21
   6  -8  10 484.247 68.0914  13
 -10  -8   6 507.557 49.1752  36
   8  -6  10 516.389 67.7963  13
  -6  10  -8 386.203 74.4662  21
  -6   8 -10 472.527 71.9447  21
  -8 -10  -6 303.890 46.8556  38
 -10  -8   6 487.540 48.2926  42
   8 -10  -6 443.134 62.9420  41
  -6   8  10 512.405 51.5298  35
  -8   6  10 506.093 50.6683  35
 -10   6   8 520.217 54.0808  35
 -10  -6   8 472.818 49.1133  20
 -10   8   6 507.868 54.8443  35
  -8  10   6 440.092 53.5942  35
   8   6  10 514.164 61.3909  30
 -10   8  -6 389.975 63.0610  39
  10  -6  -8 459.018 68.7549  41
  -6 -10  -8 312.728 46.4871  38
  10  -6   8 434.220 54.1072  38
  10  -6  -8 436.442 68.0833  34
  10  -8  -6 395.870 62.6486  34
   8  -6 -10 563.745 72.1168  34
   8 -10  -6 464.732 56.5438  34
   6 -10  -8 408.570 55.5468  34
  -8   6  10 525.036 73.0481  13
   8 -10   6 647.111 69.6118  24
 -10   8  -6 295.644 67.9757  20
  -6   8 -10 424.272 68.8628  12
  -8 -10   6 582.062 54.3679  36
   6  -8 -10 522.907 70.5585  41
  10  -6  -8 478.421 67.6733  33
  10  -8  -6 473.668 62.3822  33
   8 -10  -6 470.531 58.5984  33
   6  -8 -10 486.996 59.0459  33
   6 -10  -8 493.944 59.0599  33
   6   8 -10 564.725 102.934  19
 -10   6  -8 586.079 66.3858  12
   8   6  10 410.366 48.3082  32
  -8   6 -10 564.239 67.9394  12
 -10   8  -6 462.873 61.4324  12
   6  -8  10 511.818 53.9712  22
   8   6 -10 432.748 67.2160  40
  -8  10  -6 401.112 63.8002  12
  -8   6  10 559.242 55.5369  32
  -6  10   8 600.360 57.3090  32
  -8  10   6 544.087 58.2593  32
 -10   8   6 485.802 55.0952  32
  10   8  -6 422.214 104.716  19
  10  -6   8 540.253 53.7569  31
  10  -8   6 521.591 55.8589  31
   8 -10   6 492.126 51.7696  31
  -6  -8  10 463.424 48.6205  42
 -10   8   8 125.794 38.7773  21
  10   8   8 166.427 47.1595  30
   8  10   8 84.6871 44.4410  30
 -10   8  -8 164.451 52.6061  12
  -8   8 -10 84.4465 54.3743  12
  -8  10  -8 119.004 55.7089  12
  -8 -10   8 116.928 76.7893  18
 -10  -8   8 65.7285 71.8517  18
  -8  -8  10 55.4549 73.4335  18
   8  -8  10 123.681 47.4443  24
   8  10  -8 106.490 69.4873  29
   8   8 -10 141.889 68.5408  29
  -8  10   8 151.622 39.8934  28
  -8   8  10 113.290 36.6214  21
 -10  -8   8 92.4205 37.5499  37
  -8  10   8 176.079 59.3779  17
  10  -8   8 121.155 42.4671  27
   8  -8  10 145.228 41.8714  27
   8 -10   8 140.216 45.0259  27
  -8   8  10 99.0172 34.7045  26
 -10   8   8 117.631 37.4288  26
 -10   8  -8 47.3788 67.2029  26
  -8  10  -8 120.101 72.9219  26
  -8   8 -10 102.075 67.3347  26
   8  -8 -10 138.718 82.8472  16
  10  -8  -8 95.5945 79.3872  16
   8 -10  -8 108.759 79.3253  16
  -8 -10   8 88.6012 72.9795  11
 -10  -8   8 147.945 77.4292  11
   8 -10   8 167.581 66.3659  16
   8  -8  10 244.044 68.3671  16
  -8  -8  10 123.919 73.9020  11
   8  10  -8 130.149 71.3209  25
  10   8  -8 183.020 71.3528  25
   8 -10  -8 101.388 50.6245  34
   8   8 -10 160.763 69.2463  25
   8  -8 -10 91.7912 53.4192  25
 -10   8  -8 75.9558 64.5529  20
  10   8   8 121.074 53.3586  23
  -8  -8  10 106.865 37.5176  42
   8  10   8 147.043 56.4008  23
   8 -10   8 122.572 42.9683  38
   8  -8 -10 102.880 56.4351  41
   8 -10  -8 122.072 53.9888  41
  -8 -10   8 106.473 36.0621  36
  -8  10  -8 124.386 71.1492  21
  -8  10  -8 101.380 59.3618  39
   8  10  -8 122.145 63.4380  40
   8   8 -10 106.688 62.2852  40
 -10   8   8 180.149 40.7325  39
  -8   8  10 127.048 35.2673  39
  10  -8   8 192.941 45.5955  38
  -8   8 -10 74.3455 61.0164  39
   8  -8  10 221.423 45.0797  22
 -10   8  -8 77.1622 56.6747  39
   8  -8 -10 52.6067 79.3623  14
  10  -8  -8 107.200 80.5197  14
   8  10   8 106.237 42.3872  22
   8 -10  -8 43.0664 75.8829  14
   8   8  10 140.925 43.2495  22
   8  -8  10 102.246 39.9312  38
  10  -8   8 116.776 41.2140  22
  -8 -10  -8 83.7913 38.9676  38
   8 -10   8 205.908 48.1959  22
   8 -10   8 187.717 65.8036  14
   8  -8  10 294.283 71.9983  14
  -8 -10   8 137.036 40.0808  37
   8  -8  10 128.731 46.8369  36
 -10   8  -8 96.0997 70.0668  21
  -8   8 -10 142.151 67.4052  21
   8 -10   8 180.737 52.5535  24
 -10   8   8 136.753 38.4725  35
  10  -8  -8 139.180 57.9694  41
 -10  -8  -8 95.0313 43.3474  36
  10  -8  -8 106.981 58.8557  34
   8  -8 -10 106.037 57.2998  34
   8 -10   8 90.6702 57.2591  13
  10  -8   8 226.122 63.5139  13
   8  -8  10 135.034 54.9050  13
 -10  -8   8 142.991 35.8581  42
  -8 -10   8 144.166 37.0986  42
  10  -8  -8 90.8217 52.8797  33
   8  -8 -10 133.101 53.7232  33
   8 -10  -8 139.585 49.8378  33
   8 -10   8 182.686 45.6309  36
  -8  10   8 189.347 46.9136  32
   8   8 -10 141.894 99.4890  19
   8  10  -8 77.5596 100.573  19
  10   8  -8 113.114 101.068  19
  -8   8  10 97.4464 38.1602  32
 -10   8   8 106.402 40.1184  32
  10  -8   8 244.035 58.1480  24
  -8  10   8 95.2866 37.1520  39
  10   0  10 2489.03 113.934  30
 -10   0  10 1276.35 145.072  18
   0  10 -10 2307.26 118.197  29
 -10  10   0 1903.95 119.326  17
   0  10 -10 2280.66 121.414  28
 -10 -10   0 2190.28 93.7625  27
 -10   0  10 2665.70 100.746  26
  10 -10   0 1605.39 124.994  16
 -10  10   0 2460.24 108.282  26
 -10   0  10 1333.74 148.210  11
  10   0 -10 2457.52 136.585  34
   0 -10  10 2426.87 130.262  16
  10  10   0 2181.38 141.439  25
  10   0 -10 2322.13 131.978  25
  10 -10   0 1475.40 142.473  15
 -10  10   0 2427.78 107.977  21
  10   0  10 2214.25 106.583  24
   0  10  10 2219.67 123.935  17
  10   0  10 2248.21 139.236  15
   0  10  10 2606.65 108.939  23
  10  10   0 2894.84 129.104  23
  10 -10   0 1563.59 122.646  14
 -10  10   0 2062.06 98.6427  39
   0  10 -10 2398.21 119.279  39
  10   0  10 2186.65 105.907  22
  10  10   0 2249.76 174.648  12
 -10   0  10 2437.32 95.5128  35
 -10 -10   0 2172.66 91.3802  38
   0 -10  10 2145.47 104.626  36
   0 -10  10 2224.01 107.781  37
 -10   0  10 2604.75 100.456  21
   0  10 -10 2271.16 115.791  40
 -10 -10   0 2231.84 101.976  36
   0 -10  10 2412.19 120.865  13
   0 -10  10 2142.56 97.1078  35
   0 -10  10 2565.03 131.281  14
 -10   0  10 2515.78 100.592  20
  10  10   0 2603.33 150.873  34
  10 -10   0 2286.65 122.847  24
   0 -10 -10 1855.79 87.4152  33
  10 -10   0 2145.17 99.8689  33
   0  10 -10 2179.93 126.098  19
  10   0 -10 1834.35 140.824  19
  10   0  10 2741.01 110.548  32
   0  10  10 1849.37 88.9173  32
   0  10 -10 2044.82 138.181  12
  10 -10   0 2378.84 102.536  31
  10  -2  10 8765.87 224.858  24
 -10 -10   2 7164.99 207.803  18
  10   2  10 7241.36 187.215  30
  10  10  -2 6235.34 251.720  12
   2  10  10 6704.02 180.315  30
 -10  -2  10 4660.61 216.060  18
  10  10   2 4482.51 231.952  12
   2  10 -10 6629.74 191.545  29
 -10  10  -2 6037.86 174.770  39
  -2  10  10 7017.67 181.419  28
  10 -10  -2 6306.84 161.247  41
 -10  10  -2 5760.14 188.657  17
 -10  10   2 4515.19 178.837  17
  -2  10 -10 5628.95 176.636  28
   2  10 -10 6344.66 184.234  28
  -2  10  10 8639.58 225.171  17
  10 -10   2 6586.39 173.947  27
  10 -10   2 6478.89 171.353  22
  -2  10  10 6508.07 154.439  39
   2 -10  10 6477.92 160.324  27
 -10 -10   2 7268.22 209.001  11
   2  10  10 6937.99 180.380  23
 -10 -10   2 6068.26 151.561  27
 -10 -10  -2 5699.43 145.625  27
   2 -10 -10 6731.57 205.848  16
 -10   2  10 7154.59 165.508  26
  10 -10  -2 5247.69 188.149  16
 -10  -2  10 4578.30 215.493  11
  10 -10   2 4364.39 178.096  16
 -10  10   2 7560.64 176.880  26
 -10  10  -2 6152.01 169.518  26
 -10   2 -10 4932.83 157.556  26
   2 -10  10 7534.44 225.196  16
  10  10   2 5765.84 214.333  25
  10  10  -2 6755.40 225.262  25
  10   2 -10 7233.96 211.954  25
  10  -2 -10 6691.77 202.200  25
  10 -10  -2 4893.20 212.951  15
 -10 -10   2 6342.52 161.491  36
  10  -2  10 7240.33 231.910  15
 -10   2  10 7380.91 169.198  21
  10   2  10 5043.15 197.504  15
 -10  -2  10 6447.31 149.503  42
 -10   2  10 6708.68 163.553  35
  10  10   2 7426.34 206.968  23
  10  10  -2 8407.86 239.102  34
  -2 -10  10 5968.21 166.899  42
   2  10 -10 6678.95 193.282  40
  10 -10  -2 5109.87 184.440  14
  10 -10   2 4422.79 177.678  14
  10  10   2 7666.06 184.474  22
 -10  10   2 6240.23 164.934  39
  -2  10 -10 6347.27 182.865  39
  10   2  10 5769.60 164.710  22
  10  -2  10 6519.35 178.052  22
 -10 -10  -2 5144.39 138.492  38
   2 -10  10 5826.72 166.287  37
  -2 -10  10 6440.76 175.545  37
 -10 -10   2 6560.28 162.813  37
 -10  10   2 7508.16 176.862  21
 -10  10  -2 5996.93 168.049  21
  -2 -10  10 6312.94 170.231  36
 -10   2 -10 4627.83 151.748  21
   2 -10  10 6863.00 203.543  13
 -10 -10  -2 5986.39 160.548  36
  -2 -10  10 6094.23 154.470  35
 -10  -2  10 7154.45 168.473  20
  -2  10  10 7244.15 179.265  23
 -10   2  10 6723.95 155.802  20
 -10  10   2 5728.56 158.979  35
  10 -10   2 6328.27 192.528  24
  10  10   2 4473.50 191.737  34
  10   2 -10 7127.02 208.810  34
  -2  10 -10 5620.12 169.618  40
  10  -2 -10 6673.09 208.436  34
  -2  10 -10 6237.47 196.668  19
  10 -10  -2 6114.50 164.508  33
   2  10 -10 6773.18 212.751  19
   2 -10 -10 5798.04 154.863  33
  10   2 -10 6202.31 223.201  19
  10  -2  10 8628.35 189.925  32
  10   2  10 7989.27 179.360  32
  -2  10  10 6108.76 160.365  32
 -10  10   2 5907.95 169.075  32
  -2  10 -10 6407.74 223.431  12
  10 -10  -2 6306.64 162.664  31
   2 -10  10 7358.03 220.925  14
   2 -10 -10 6703.70 205.096  14
  10 -10   4 156.410 43.1439  31
  10 -10  -4 157.606 41.0826  31
  10   4  10 261.313 53.0823  30
 -10   4  10 295.269 42.6894  21
   4  10  10 168.054 48.1413  30
 -10   4 -10 182.824 52.5689  12
 -10 -10   4 217.518 66.6666  18
  -4 -10  10 341.597 80.5215  18
  -4  10 -10 165.188 72.5462  12
 -10  -4  10 135.448 74.3622  18
   4 -10  10 182.378 48.1099  36
   4  10 -10 180.637 64.1913  29
  -4  10  10 210.663 42.3411  28
 -10  -4  10 192.327 38.5153  42
  -4  10  10 328.133 61.4052  17
  -4  10 -10 126.975 59.5844  28
   4  10 -10 149.000 66.0694  28
 -10 -10   4 179.890 43.5278  37
 -10   4  10 226.998 40.9071  35
 -10  10   4 135.136 60.2033  17
 -10 -10   4 254.184 40.1403  27
  10 -10   4 172.242 43.3778  27
   4 -10  10 191.588 44.4406  27
 -10 -10  -4 147.908 37.4213  27
 -10   4  10 313.360 42.7990  26
  10  10   4 170.239 56.0580  23
   4 -10  10 291.802 68.4267  14
 -10  10   4 169.481 42.1069  26
 -10  10  -4 193.478 60.9708  26
 -10   4 -10 126.476 59.6083  26
  -4  10 -10 208.921 71.1939  26
   4 -10 -10 196.176 81.8959  14
   4 -10 -10 215.124 80.3001  16
  10 -10  -4 197.453 86.6716  16
 -10 -10   4 167.497 66.4296  11
  10 -10   4 121.676 68.0825  16
  -4 -10  10 282.059 80.4332  11
   4 -10  10 308.094 69.7045  16
  10  10   4 171.015 78.8621  25
 -10  -4  10 92.9496 75.1934  11
  10  -4 -10 164.329 64.9115  25
  10  -4  10 230.904 53.0195  24
  10 -10   4 162.114 69.0448  14
  10  10  -4 184.350 55.2889  41
   4 -10  10 149.772 39.2171  38
  10  -4  10 247.521 68.1900  15
  10   4  10 150.225 64.7830  15
   4 -10 -10 123.633 47.8006  41
  10  -4 -10 203.354 66.1538  34
  10 -10  -4 177.750 51.2732  41
  10   4 -10 180.089 57.9538  40
  -4  10  10 208.396 50.8698  23
   4  10  10 166.473 50.6793  23
  -4  10  10 213.976 41.3412  39
  10  10   4 215.094 45.8251  22
  -4  10 -10 167.910 71.0177  39
  10  -4  10 159.247 43.1527  38
  10  -4  10 240.768 47.1431  22
  10 -10   4 205.999 45.4540  22
  10 -10   4 162.012 40.8160  38
  10   4  10 152.687 42.5998  22
  10 -10  -4 295.740 58.5928  33
  10  -4 -10 314.538 71.4434  41
  -4 -10  10 189.944 43.9887  37
 -10  -4  10 177.697 37.0538  37
  -4 -10  10 173.320 42.5127  42
 -10 -10   4 209.073 42.9504  36
 -10  10   4 176.475 42.5094  21
  -4 -10  10 158.982 40.8137  36
 -10 -10  -4 161.490 43.4256  36
 -10  10  -4 165.730 61.9198  21
 -10  10  -4 140.787 54.2919  39
 -10   4 -10 137.224 58.8484  21
  -4  10 -10 170.982 69.3095  21
 -10  -4  10 185.009 39.0292  20
  -4 -10  10 150.467 39.0239  35
  -4  10  10 158.826 36.5945  35
 -10  10   4 169.452 45.1449  35
  10  10   4 148.589 81.5351  34
  10 -10   4 127.390 70.7954  13
   4 -10  10 227.172 56.1729  13
   4 -10 -10 241.704 48.7336  33
 -10   4  10 267.965 63.1351  13
 -10  10   4 174.284 42.8507  39
  -4  10  10 193.896 41.7199  32
 -10   4  10 185.287 40.0222  32
   4  10 -10 275.149 95.3132  19
  10   4  10 201.146 44.8911  32
  10 -10  -4 137.460 84.1777  14
  10   4 -10 201.392 90.4980  19
 -10  10   4 180.506 48.0694  32
  10 -10   4 243.848 61.5567  24
 -10 -10   6 7537.07 247.693  18
  10   6  10 6475.75 186.802  30
  -6 -10  10 6154.57 222.428  18
  10  10   6 6558.44 169.337  30
   6  10  10 5912.78 179.868  30
 -10  -6  10 4098.45 188.037  18
  10  10   6 3119.76 226.482  12
  -6  10  10 6597.94 168.667  39
  10  -6  10 6506.06 186.101  38
 -10   6  10 6480.22 167.974  35
   6  10 -10 5877.70 195.575  29
   6 -10  10 7770.73 238.993  14
  10  -6  10 6844.61 184.445  22
 -10   6  10 6697.76 165.075  39
 -10  10   6 4201.95 170.535  17
  -6  10 -10 5125.31 161.680  28
  10   6 -10 5963.20 183.227  40
 -10 -10   6 6023.90 149.375  42
  10 -10   6 6260.14 181.028  27
   6 -10  10 6158.38 168.442  27
 -10 -10   6 6234.75 150.551  27
 -10 -10   6 7539.28 250.484  11
   6 -10 -10 5318.69 198.422  16
  -6 -10  10 6246.47 225.477  11
  10 -10  -6 4759.19 185.595  16
  10  10   6 5175.48 198.771  25
 -10  -6  10 4196.50 191.677  11
 -10   6  10 6252.63 157.980  26
 -10  10   6 6549.21 154.380  26
 -10  -6  10 6231.92 161.994  42
 -10  10  -6 6119.93 192.969  26
  10 -10   6 5745.89 201.223  16
 -10   6 -10 4612.78 166.728  26
  -6  10 -10 5443.46 178.531  26
   6 -10  10 7610.31 240.006  16
  10  10  -6 6618.30 221.562  25
  10   6 -10 6547.83 208.851  25
   6  10  10 5831.45 173.745  23
  10  -6 -10 5082.12 168.265  25
  10  -6  10 9343.45 239.757  24
   6 -10  10 9974.28 212.031  24
  10  -6  10 7167.64 229.892  15
  -6 -10  10 5791.15 161.724  42
   6 -10  10 5834.45 179.764  36
  -6  10 -10 5315.15 174.792  21
  10  10   6 7304.82 191.879  22
   6  10 -10 6292.40 197.125  40
  10  -6 -10 6405.76 203.545  41
  10 -10  -6 5675.54 174.913  41
  10  10   6 5954.92 193.997  23
 -10  -6  10 5994.77 160.238  37
   6 -10 -10 5208.74 195.547  14
  -6  10  10 6833.64 181.114  32
  10 -10  -6 4739.91 183.998  14
 -10  10   6 6328.29 165.747  39
   6  10  10 6251.40 165.119  22
  10 -10   6 5677.72 198.434  14
 -10   6 -10 4667.99 151.612  39
  10 -10   6 5645.66 205.677  13
  10 -10   6 6308.39 175.786  38
   6 -10  10 6661.64 174.840  38
   6 -10  10 6922.83 173.211  22
 -10  10   6 6856.00 158.933  21
  -6 -10  10 5910.29 168.348  37
 -10 -10   6 6242.76 167.182  37
 -10   6  10 6327.64 159.370  21
  -6 -10  10 6190.74 160.365  36
 -10  10  -6 5709.89 185.304  21
   6 -10  10 6316.57 213.568  13
 -10   6 -10 4456.02 161.613  21
 -10 -10  -6 4349.34 135.164  38
  10 -10   6 6461.66 181.972  22
   6 -10 -10 5700.47 178.952  41
 -10  -6  10 6614.50 164.476  20
  -6  10  10 6101.99 157.094  35
 -10  10   6 6260.65 167.712  35
 -10 -10   6 6284.53 155.845  36
   6 -10 -10 5776.83 172.059  34
  10   6  10 6242.89 178.780  22
 -10  10  -6 5113.10 169.138  39
 -10 -10  -6 4751.73 144.768  36
  10 -10  -6 5559.61 169.675  33
   6 -10 -10 6273.95 172.065  33
   6  10 -10 5840.69 235.444  19
 -10   6 -10 6229.50 194.329  12
 -10  10  -6 5289.98 172.869  12
 -10   6  10 6571.47 171.428  32
  -6  10 -10 5005.62 200.855  12
 -10  10   6 6620.42 179.101  32
  10 -10   6 6695.08 167.202  31
  -8 -10  10 1408.38 87.8443  37
  10   8  10 1423.69 98.7069  30
 -10 -10   8 1417.09 125.276  18
  10  10   8 1426.77 91.8938  30
 -10  -8  10 1123.75 115.034  18
 -10   8  10 1428.69 82.6712  39
   8  10 -10 1384.02 112.607  29
   8 -10 -10 1327.96 101.317  41
 -10  10   8 1288.29 99.5989  17
  10 -10   8 1517.60 94.0257  27
   8 -10  10 1335.33 87.4851  27
  10 -10   8 1442.30 90.1364  38
 -10 -10   8 1428.19 127.304  11
  10  -8 -10 963.053 108.076  16
   8 -10 -10 1134.38 117.227  16
  10 -10  -8 1198.15 117.210  16
 -10  -8  10 1166.04 117.014  11
 -10   8  10 1421.90 78.8135  26
   8 -10 -10 1093.83 115.901  14
 -10  10  -8 1227.98 106.332  26
 -10   8 -10 1086.74 101.827  26
  -8  10 -10 1129.42 106.449  26
   8 -10  10 1685.50 124.136  16
  10  10  -8 1363.13 119.938  25
   8  10 -10 1555.13 117.758  25
  10   8 -10 1412.45 117.821  25
  10  -8  10 2138.15 120.265  24
   8 -10  10 2289.19 113.403  24
  10 -10   8 2455.44 127.327  24
  -8 -10  10 1279.88 80.8418  42
 -10  -8  10 1369.34 81.8408  42
 -10 -10   8 1345.59 78.2806  42
   8  10  10 1227.27 92.9608  23
  10  -8 -10 1263.97 102.111  41
  10 -10  -8 1260.94 95.9438  41
  10  10   8 1272.99 100.703  23
  10  -8 -10 1120.22 111.257  14
  -8  10 -10 1079.98 96.2997  39
  10 -10  -8 1166.30 118.058  14
   8  10 -10 1261.65 104.157  40
  10   8 -10 1308.49 101.622  40
 -10  10   8 1601.50 86.9243  39
  10  -8  10 1444.61 90.7879  22
   8  10  10 1411.68 89.7846  22
  10   8  10 1545.01 94.4511  22
 -10  10  -8 1111.65 93.3962  39
   8 -10  10 1553.51 113.153  13
  10  -8 -10 1181.03 99.0524  34
   8 -10  10 1713.95 123.993  14
   8 -10  10 1375.47 88.6344  38
   8 -10  10 1524.39 88.9210  22
  10 -10   8 1429.51 93.8751  22
 -10 -10  -8 948.443 72.4367  38
 -10   8 -10 1014.76 87.5435  39
  10   8 -10 1392.18 150.500  19
 -10  -8  10 1403.66 85.4859  37
 -10 -10   8 1367.09 84.6361  37
 -10   8  10 1589.90 83.2939  21
   8 -10  10 1421.61 94.2626  36
  10 -10   8 1380.43 112.020  13
 -10  10  -8 1276.32 105.294  21
 -10   8 -10 986.391 99.5519  21
  -8  10 -10 1280.25 107.494  21
  10  -8  10 1487.61 108.663  13
 -10   8  10 1504.36 83.7284  35
  -8  10  10 1468.69 82.7179  35
 -10  10   8 1498.53 87.0061  35
  10 -10  -8 1170.71 89.0387  34
   8 -10 -10 1280.80 93.4572  34
 -10   8 -10 830.824 91.0029  20
  10  -8  10 1364.97 91.0388  38
  10  -8 -10 1321.98 98.2253  33
  10 -10  -8 1304.52 93.4853  33
   8 -10 -10 1431.13 95.9635  33
   8  10 -10 1167.04 139.685  19
  10  10  -8 983.065 139.897  19
  -8  10  10 1757.47 96.1289  32
 -10  10  -8 1192.13 95.1074  12
 -10   8  10 1637.59 91.5794  32
  -8  10 -10 1039.87 98.5512  12
 -10  10   8 1663.47 93.8238  32
  10  10  10 5347.09 172.142  30
 -10 -10  10 4926.20 208.703  18
 -10  10 -10 4515.10 164.762  21
  10 -10 -10 3758.89 167.383  16
 -10 -10  10 5044.08 212.213  11
 -10  10 -10 4468.89 167.170  26
 -10  10 -10 4390.83 165.764  12
  10 -10  10 5538.93 167.941  38
  10  10 -10 5929.43 210.356  25
  10 -10  10 8871.49 222.969  24
 -10 -10  10 6169.68 160.874  42
  10 -10 -10 3779.97 167.232  14
 -10  10  10 5484.10 150.634  39
  10  10  10 6120.91 177.033  22
 -10  10 -10 3830.06 146.478  39
  10 -10  10 5768.93 163.565  22
 -10 -10  10 6123.71 170.046  37
  10 -10  10 5950.43 202.365  13
 -10  10  10 5556.40 151.635  35
 -10 -10 -10 3325.80 119.247  38
  10 -10 -10 4592.09 164.181  41
  10 -10 -10 4516.91 154.307  34
  10 -10 -10 4894.17 164.171  33
  10  10 -10 6068.21 259.963  19
 -11   1   1 5194.88 130.453  44
   1 -11  -1 5383.57 135.859   3
 -11   1  -1 5916.34 157.548  20
  -1 -11  -1 5573.85 146.738   3
  -1  -1  11 4672.58 192.322  18
  -1  11  -1 6327.28 167.592   2
   1  -1  11 5691.26 198.751  18
  -1   1  11 4515.76 197.563  18
  -1  11   1 5867.82 147.664  30
   1  11  -1 6582.75 153.970  30
  -1  11  -1 5984.85 151.000  30
   1   1  11 5210.01 200.921  18
 -11   1  -1 5545.96 146.879  42
   1 -11   1 5040.22 129.784   3
  -1   1 -11 5748.30 138.887  10
  -1 -11   1 5186.07 137.747   3
  -1  11   1 5502.34 150.224  29
   1  11   1 5952.12 160.860  29
  -1  11  -1 5603.10 151.349  29
   1  11  -1 6320.08 172.946   2
  -1  11   1 6963.56 167.450   2
 -11  -1  -1 7314.97 159.473  17
 -11  -1   1 7167.16 154.995  17
  -1   1 -11 4740.52 128.658  29
   1   1 -11 4764.51 137.981  29
 -11   1   1 6579.94 153.519  17
   1  11   1 5762.22 148.774  28
  -1  11   1 5803.60 150.835  28
   1  11  -1 5716.84 149.737  28
   1 -11  -1 5945.41 154.823  11
  -1 -11  -1 6164.73 166.209  11
   1   1  11 5504.15 111.095  35
  -1  11   1 5500.82 155.503  17
   1  11   1 6825.44 174.804   2
   1 -11   1 5561.29 147.158  11
  -1 -11   1 5630.36 156.042  11
   1  11   1 5715.26 157.866  17
   1  -1  11 3722.08 142.625   6
 -11   1  -1 5521.73 135.839  44
 -11  -1  -1 6033.77 147.153  42
   1   1  11 3773.59 136.711   6
   1  11  -1 6000.86 162.617  29
   1 -11   1 5607.83 123.469  27
  -1 -11   1 5990.79 126.688  27
  -1 -11  -1 5733.62 119.204  27
  11  -1   1 5608.35 138.832  31
   1 -11   1 6427.92 132.147  38
  -1  -1  11 5993.15 126.979   8
   1 -11  -1 5788.06 167.628  16
   1 -11   1 5643.38 167.243  16
 -11   1   1 6631.02 145.950  26
 -11   1  -1 5872.34 139.584  26
  -1  -1  11 4488.39 190.096  11
   1  -1  11 5699.19 199.108  11
  -1   1  11 4577.39 199.424  11
   1   1  11 5148.49 201.263  11
 -11   1   1 6603.05 146.266  21
  -1  11  -1 4555.82 140.127   5
   1  11   1 5887.30 155.222  25
  -1  11   1 5229.13 152.549   5
   1  11   1 5317.58 145.189   5
 -11  -1  -1 6311.25 164.298  20
  -1  -1  11 5184.08 132.836  37
   1  -1 -11 6430.49 157.536  25
  11  -1  -1 5655.07 187.739  15
  11  -1   1 6197.51 187.260  15
  11   1   1 7586.45 193.748  15
  -1   1  11 6312.98 130.053  24
   1   1  11 6479.74 137.036  24
 -11  -1  -1 5335.40 131.181  44
 -11  -1   1 5139.88 126.509  44
   1  -1  11 6274.29 129.446  24
  -1  11  -1 4876.75 137.432  44
  -1  11  -1 4429.38 170.754  43
   1  11  -1 4381.64 176.560  43
  -1  11   1 4972.98 168.665  43
  -1  -1 -11 4447.24 125.056  10
   1  -1 -11 5393.77 131.300  10
   1  -1 -11 5737.54 143.099   4
  11   1   1 6433.38 156.998  33
  -1 -11  -1 6099.39 124.179  38
 -11  -1   1 6639.57 151.077  42
  11  -1   1 5870.37 135.686  41
  11  -1  -1 5731.26 149.899  41
 -11   1  -1 5496.23 116.629   2
  -1  11   1 5757.48 155.225  40
   1  11   1 6021.09 157.555  40
  -1  11  -1 5584.26 156.095  40
   1  11  -1 6507.48 166.773  40
  11   1   1 5783.16 150.410  23
   1 -11  -1 5685.38 165.167  14
  11  -1   1 5602.56 144.206  23
   1 -11   1 5679.09 167.186  14
  11   1  -1 4363.96 170.742   1
  -1   1  11 6726.41 132.689   8
  11  -1  -1 4575.90 169.076   1
   1 -11  -1 6093.86 124.633  38
  -1 -11   1 6463.15 129.281  38
 -11   1  -1 5795.83 139.615  21
   1 -11  -1 4842.00 138.245   4
   1  -1  11 5405.24 140.214  37
  11   1  -1 5626.76 152.217  34
 -11  -1  -1 4996.48 114.598   2
  -1  -1 -11 5954.20 142.059   4
  -1  -1  11 6483.77 122.745  24
 -11  -1   1 6124.47 148.496  37
 -11   1   1 5520.10 134.926  37
 -11   1  -1 4987.69 139.494  37
   1 -11   1 4886.71 139.639   4
   1   1  11 6214.07 139.244   8
  -1  11  -1 5927.13 154.372  28
  -1 -11   1 6176.63 125.099  36
   1  -1  11 5676.81 133.886   8
   1  -1  11 4876.13 148.561  13
  -1   1  11 4953.76 122.518  20
  -1  -1  11 5110.56 127.272  20
   1   1 -11 6131.69 149.184   1
   1  -1  11 5897.44 117.491  35
  -1  -1  11 6194.76 127.247  35
  -1  -1  11 4981.83 150.875  13
  -1   1  11 5820.77 120.303  35
   1   1  11 4847.61 151.516  13
  -1   1  11 5178.84 157.120  13
  -1   1 -11 5958.69 144.574   1
  11   1   1 5268.05 138.447  34
 -11  -1   1 6167.12 149.368  20
  11  -1  -1 5622.78 144.746  34
  -1 -11  -1 7386.28 140.765   7
 -11  -1  -1 5469.03 149.642  37
  11   1  -1 6203.07 150.406  41
  11   1  -1 6082.96 153.302  33
  11  -1  -1 6472.30 158.088  33
   1   1 -11 6571.29 161.954  19
   1 -11  -1 5536.28 110.238  33
  11   1  -1 4876.81 200.896  19
  11  -1  -1 5210.77 200.120  19
  11   1   1 4752.62 202.224  19
  11  -1   1 5024.80 201.660  19
   1  -1  11 5807.37 125.549  32
   1   1  11 5353.12 125.898  32
  11   1   1 6079.46 141.102  41
  -1   1  11 5956.57 133.129  32
 -11  -1  -1 7030.63 160.377   7
  -1 -11  -1 6141.73 165.801  18
 -11  -1   1 7028.26 162.742   7
 -11   1  -1 6887.78 158.437   7
  11   1   1 5846.13 139.505  31
 -11   1   1 6217.88 154.889   7
  -1  11  -1 6457.29 176.955  12
   1  11  -1 7068.97 201.921  12
  -1  11   1 7795.50 192.159  12
   1 -11  -1 5902.62 154.371  18
   1 -11   1 7049.52 131.736  31
   1 -11   1 5496.29 146.480  18
   1  11   1 7527.59 201.055  12
  -1 -11   1 5667.26 157.059  18
   1 -11  -1 6183.47 125.943  31
  -1 -11   1 6404.43 120.538  31
  -1 -11  -1 5791.87 119.489  31
  11   3   1 131.986 28.8969  31
  11  -3   1 125.946 75.9828  15
  11  -3   1 96.4318 30.8043  31
  11  -3  -1 122.990 31.1646  31
  -1  11  -3 165.760 36.9164  44
   1 -11  -3 113.018 27.4350  31
 -11  -1   3 140.957 36.4926  37
   3   1  11 276.524 39.8178  30
   1  11   3 136.984 57.9134  43
 -11   3   1 171.556 42.4257  42
   1  11  -3 174.606 39.7584  30
  -1 -11  -3 157.258 59.8430  18
   1  -3 -11 137.327 31.3718  10
   1  11   3 446.790 47.4427  23
   1  11   3 162.908 40.6830  30
   3  11   1 143.049 37.3858  30
  -1  11   3 108.531 38.5152  30
   3  11  -1 158.304 36.7887  30
  -3 -11   1 198.233 60.8790  18
  11   1   3 142.261 57.0701  15
  -3  11   1 130.180 40.6881  30
  -1 -11   3 115.210 58.1479  18
  -3  11  -1 115.186 40.8415  30
 -11  -3  -1 142.157 36.9112   7
 -11  -1  -3 161.353 37.4308   7
 -11  -1   3 179.737 39.8916   7
 -11   3  -1 108.170 35.9845   7
 -11   1   3 100.396 35.7338   7
 -11   3   1 132.227 35.5603   7
  -1  -3  11 105.820 73.1480  18
  -3  -1  11 32.6894 74.9792  18
  -3  11  -1 128.082 48.3026  12
  -1  11  -3 148.307 53.0533  12
  -3  11  -1 159.299 43.2381  40
  -1   3  11 54.8021 76.0004  18
   1   3  11 293.203 35.1708   8
   3   1 -11 130.724 35.3358   4
   3  11  -1 142.088 61.4102  12
 -11  -1  -3 310.114 46.1461  17
   3  11   1 100.398 59.0571  12
   1  11   3 169.239 56.1800  12
   3   1 -11 206.943 47.5157  29
  -1  11   3 181.025 47.7227  29
   1  11   3 145.930 45.9372  29
  -1  11  -3 132.938 47.4498  29
   1  11  -3 128.830 50.3561  29
 -11  -3  -1 127.356 36.9169  42
   3  11   1 244.185 50.0061  40
  -1   3 -11 136.770 40.9251  29
   1   3 -11 103.175 43.5202  29
  -1 -11   3 243.787 32.9010  36
 -11   1   3 92.4896 36.0663  42
  -3  11   1 452.521 52.6343  28
  -3  11  -1 207.964 47.8561  28
  -3  11   1 165.703 44.9650  40
  11  -1  -3 119.574 60.1892   1
   1  11   3 147.249 39.4573  28
  -1  11   3 134.858 40.3784  28
 -11  -1  -3 111.041 37.8959  42
   3  11  -1 131.604 45.8978  28
  -1  11   3 313.921 55.2876  40
  -1  11  -3 175.189 53.1328  28
   1  11  -3 100.887 51.5365  28
   3  -1  11 367.912 60.1327   6
  -1 -11   3 153.353 29.3895  38
 -11  -3  -1 164.022 37.6241  17
 -11  -3   1 148.319 35.7759  17
 -11   1  -3 171.118 39.5571  17
 -11  -1   3 128.840 33.1336  17
 -11   3  -1 123.380 37.9771  17
 -11   1   3 126.081 41.4212  17
 -11   3   1 183.600 46.2525  17
  11   3  -1 191.596 68.3427   1
 -11  -3   1 129.381 36.1302  42
  -1  -3  11 211.559 34.2836  42
   1 -11   3 190.687 30.9357  27
   1  11   3 86.2660 43.6892  40
  -3  11   1 104.937 41.4150  17
  -1  11   3 140.955 43.5189  17
  -3 -11   1 152.513 26.5230  27
   1  11   3 174.184 43.2585  17
  -3 -11  -1 191.050 28.4791  27
   1 -11  -3 248.246 60.7851  18
   3 -11   1 136.043 29.1552  27
  -1 -11   3 112.796 25.8724  27
  -1   3  11 365.787 35.4836  26
  -3  -1  11 235.458 31.7802  26
  -1  -3  11 123.921 39.3827  13
   1  -3  11 104.590 45.6926   6
 -11   1   3 168.133 36.8758  26
 -11  -1  -3 126.562 27.0753   2
   3   1  11 165.460 49.3497   6
   1   3  11 123.496 43.5875   6
  -3   1 -11 134.139 32.9948   1
  -3   1  11 97.4929 26.4895  26
 -11   3   1 144.032 39.9435  26
 -11   3  -1 147.718 43.8602  26
 -11   1  -3 146.514 43.5573  26
   1 -11  -3 252.898 59.6512  11
   3  -1  11 72.3907 35.0717  13
  -1 -11  -3 201.410 60.0328  11
  -3 -11   1 244.680 62.7528  11
  -1 -11   3 63.4856 55.6984  11
   1 -11  -3 175.132 70.0836  16
   1 -11  -3 194.351 46.5559   3
   3 -11  -1 291.432 69.6798  16
  -1 -11  -3 153.503 46.9980   3
   3 -11   1 89.5037 59.6795  16
   1 -11   3 163.593 58.7547  16
  -3 -11  -1 132.094 27.5991  31
  -3 -11   1 197.071 49.8678   3
  11  -1   3 259.609 69.3714  15
   1  -3  11 77.5293 42.8727  16
  -1  -3  11 83.6742 40.0540  16
   3  -1  11 194.070 52.5578  16
   1  11   3 135.209 46.1618  25
  -3  11  -1 116.657 39.4525   2
   3  11   1 139.118 50.2093  25
   3  11  -1 227.358 51.8903  25
  -1 -11   3 116.740 46.0728   3
   3 -11   1 84.9971 59.3733  14
  -1  11  -3 101.487 40.2636   2
  -1  -3  11 95.0866 75.4835  11
   3  -1  11 209.948 44.9843  15
   3   1 -11 149.814 45.3638  25
  -3  -1  11 65.8312 75.4083  11
   3  -1 -11 148.077 47.3896  25
  -1   3 -11 135.781 36.4529   1
  -1   3  11 166.556 30.9568  24
  11   3   1 192.086 42.9851  41
   1   3  11 154.280 32.1335  24
  -3  11  -1 74.6865 42.9332   5
  -3  11   1 93.8018 44.1699   5
   3 -11  -1 163.252 28.2385  38
 -11  -1   3 171.060 31.1397  44
   3   1  11 187.947 33.3110  24
 -11   1   3 461.054 42.6002  44
   3  11  -1 79.3805 46.1255   2
 -11   3   1 157.455 34.6224  44
  -1   3  11 127.337 85.1740  11
   1  -3  11 167.964 26.6420  24
[truncated: 427,317 more chars]
