# Supplementary material for: Relatively oxidized conditions for diamond formation at Udachnaya (Siberia)
Source: Copernicus journal article supplement (doi:10.5194/ejm-34-549-2022), 2022-11-15
Supplement: Supplementary file 1 [file ejm-34-549-2022-supplement.zip › Supplementary File_Oli_CHR_1_DC_olivine.cif]

Relatively oxidized conditions for diamond formation at Udachnaya (Siberia)

Luca Faccincani 1, Valerio Cerantola 2,3, Fabrizio Nestola 4, Paolo Nimis 4, Luca Ziberna 5,6, Leonardo Pasqualetto 4, Aleksandr I. Chumakov 3, Jeffrey W. Harris 7, Massimo Coltorti 1

1 Department of Physics and Earth Sciences, University of Ferrara, Via Saragat 1, 44121 Ferrara, Italy
2 Department of Earth and Environmental Sciences, Università degli Studi di Milano-Bicocca, Piazza della Scienza 4, 20126 Milan, Italy
3 ESRF – The European Synchrotron, CS40220, 38043 Grenoble Cedex 9, France
4 Department of Geosciences, University of Padua, Via Gradenigo 6, 35131 Padua, Italy
5 Department of Mathematics and Geoscience, University of Trieste, Via Weiss 2, 34128 Trieste, Italy
6 Bayerisches Geoinstitut, University of Bayreuth, Universitätsstraße 30, 95440 Bayreuth, Germany
7 School of Geographical and Earth Sciences, University of Glasgow, G12 8QQ Glasgow, UK

Correspondence to: Luca Faccincani (luca.faccincani@unife.it)

#Olivine CIF file
 
data_Oli_CHR_1_DC
 
_audit_creation_method            'SHELXL-2017/1'
_shelx_SHELXL_version_number      '2017/1'
_chemical_name_mineral            Olivine
_chemical_formula_sum
 'Fe0.150(4) Mg1.850(4) Si1 O4' 
_chemical_formula_weight          145.42

loop_
 _atom_type_symbol
 _atom_type_description
 _atom_type_scat_dispersion_real
 _atom_type_scat_dispersion_imag
 _atom_type_scat_source
 'Mg'  'Mg+2'   0.0420   0.0360
 'International Tables Vol C Tables 4.2.6.8 and 6.1.1.4'
 'Si'  'Si+4'   0.0720   0.0710
 'International Tables Vol C Tables 4.2.6.8 and 6.1.1.4'
 'Fe'  'Fe+2'   0.3010   0.8450
 'International Tables Vol C Tables 4.2.6.8 and 6.1.1.4'
 'O'  'O-2'   0.0080   0.0060
 'International Tables Vol C Tables 4.2.6.8 and 6.1.1.4'
 
_space_group_crystal_system       orthorhombic
_space_group_IT_number            62
_space_group_name_H-M_alt         'P b n m'
_space_group_name_Hall            '-P 2c 2ab'
 
_shelx_space_group_comment
;
The symmetry employed for this shelxl refinement is uniquely defined
by the following loop, which should always be used as a source of
symmetry information in preference to the above space-group names.
They are only intended as comments.
;
 
loop_
 _space_group_symop_operation_xyz
 'x, y, z'
 '-x, -y, z+1/2'
 'x+1/2, -y+1/2, -z'
 '-x+1/2, y+1/2, -z+1/2'
 '-x, -y, -z'
 'x, y, -z-1/2'
 '-x-1/2, y-1/2, z'
 'x-1/2, -y-1/2, z-1/2'
 
_cell_length_a                    4.7615(2)
_cell_length_b                    10.2003(3)
_cell_length_c                    5.9934(2)
_cell_angle_alpha                 90
_cell_angle_beta                  90
_cell_angle_gamma                 90
_cell_volume                      291.092(18)
_cell_formula_units_Z             8
_cell_measurement_temperature     293(2) 
 
_diffrn_ambient_temperature       293(2)
_diffrn_radiation_probe		  x-ray
_diffrn_radiation_type            MoK\a
_diffrn_source                    'micro-focuse sealed X-ray tube'
_diffrn_radiation_wavelength      0.71073
_diffrn_measurement_device_type   'Rigaku Oxford Diffraction SuperNova'

_exptl_absorpt_coefficient_mu     1.373
_exptl_absorpt_correction_type    interframe scaling
_exptl_absorpt_process_details    interframe scaling

_diffrn_reflns_number             44823
_diffrn_reflns_av_unetI/netI      0.0303
_diffrn_reflns_av_R_equivalents   0.1380
_diffrn_reflns_limit_h_min        -10
_diffrn_reflns_limit_h_max        10
_diffrn_reflns_limit_k_min        -22
_diffrn_reflns_limit_k_max        22
_diffrn_reflns_limit_l_min        -13
_diffrn_reflns_limit_l_max        13
_diffrn_reflns_theta_min          3.995
_diffrn_reflns_theta_max          50.830
_diffrn_reflns_theta_full         25.242
_diffrn_measured_fraction_theta_max   0.968
_diffrn_measured_fraction_theta_full  0.966
_diffrn_reflns_Laue_measured_fraction_max    0.968
_diffrn_reflns_Laue_measured_fraction_full   0.966
_diffrn_reflns_point_group_measured_fraction_max   0.968
_diffrn_reflns_point_group_measured_fraction_full  0.966
_reflns_number_total              1627
_reflns_number_gt                 1432
_reflns_threshold_expression      'I > 2\s(I)'
_reflns_Friedel_coverage          0.000
_reflns_Friedel_fraction_max      .
_reflns_Friedel_fraction_full     .
 
_reflns_special_details
;
 Reflections were merged by SHELXL according to the crystal
 class for the calculation of statistics and refinement.
 
 _reflns_Friedel_fraction is defined as the number of unique
 Friedel pairs measured divided by the number that would be
 possible theoretically, ignoring centric projections and
 systematic absences.
;
 
_computing_data_collection        
;
        CrysAlisPro, Agilent Technologies,
        Version 40.64.67a
;
_computing_cell_refinement        
;
        CrysAlisPro, Agilent Technologies,
        Version 40.64.67a
;
_computing_data_reduction         
;
        CrysAlisPro, Agilent Technologies,
        Version 40.64.67a
;
_computing_structure_refinement 'SHELXL-2017/1 (Sheldrick, 2017)'
_refine_ls_structure_factor_coef  Fsqd
_refine_ls_matrix_type            full
_refine_ls_weighting_scheme       calc
_refine_ls_weighting_details
'w=1/[\s^2^(Fo^2^)+(0.0367P)^2^+0.0568P] where P=(Fo^2^+2Fc^2^)/3'
_refine_ls_extinction_method      'SHELXL-2017/1 (Sheldrick 2017)'
_refine_ls_extinction_coef        0.022(5)
_refine_ls_extinction_expression
 'Fc^*^=kFc[1+0.001xFc^2^\l^3^/sin(2\q)]^-1/4^'
_refine_ls_number_reflns          1627
_refine_ls_number_parameters      45
_refine_ls_number_restraints      2
_refine_ls_R_factor_all           0.0325
_refine_ls_R_factor_gt            0.0283
_refine_ls_wR_factor_ref          0.0701
_refine_ls_wR_factor_gt           0.0685
_refine_ls_goodness_of_fit_ref    1.073
_refine_ls_restrained_S_all       1.072
_refine_ls_shift/su_max           0.000
_refine_ls_shift/su_mean          0.000
 
loop_
 _atom_site_label
 _atom_site_type_symbol
 _atom_site_fract_x
 _atom_site_fract_y
 _atom_site_fract_z
 _atom_site_U_iso_or_equiv
 _atom_site_adp_type
 _atom_site_occupancy
 _atom_site_site_symmetry_order  
 _atom_site_calc_flag
 _atom_site_refinement_flags_posn
 _atom_site_refinement_flags_adp
 _atom_site_refinement_flags_occupancy
 _atom_site_disorder_assembly
 _atom_site_disorder_group
Si Si+4 0.42660(5) 0.09429(2) 0.250000 0.00314(5) Uani 1 2 d S T P . .
Mg2 Mg+2 0.98997(6) 0.27755(3) 0.250000 0.00509(8) Uani 0.931(3) 2 d S T P . .
Fe2 Fe+2 0.98997(6) 0.27755(3) 0.250000 0.00509(8) Uani 0.069(2) 2 d S T P . .
Mg1 Mg+2 0.000000 0.000000 0.000000 0.00512(8) Uani 0.921(3) 2 d S . P . .
Fe1 Fe+2 0.000000 0.000000 0.000000 0.00512(8) Uani 0.079(2) 2 d S . P . .
O1 O-2 0.76600(12) 0.09160(5) 0.250000 0.00470(7) Uani 1 2 d S T P . .
O2 O-2 0.22098(12) 0.44733(5) 0.250000 0.00458(7) Uani 1 2 d S T P . .
O3 O-2 0.27806(9) 0.16335(4) 0.03332(6) 0.00519(6) Uani 1 1 d . . . . .
 
loop_
 _atom_site_aniso_label
 _atom_site_aniso_U_11
 _atom_site_aniso_U_22
 _atom_site_aniso_U_33
 _atom_site_aniso_U_23
 _atom_site_aniso_U_13
 _atom_site_aniso_U_12
Si 0.00191(8) 0.00453(8) 0.00296(7) 0.000 0.000 0.00011(5)
Mg2 0.00537(12) 0.00529(11) 0.00462(10) 0.000 0.000 0.00019(7)
Fe2 0.00537(12) 0.00529(11) 0.00462(10) 0.000 0.000 0.00019(7)
Mg1 0.00396(12) 0.00755(11) 0.00386(10) -0.00111(6) -0.00060(6) -0.00016(6)
Fe1 0.00396(12) 0.00755(11) 0.00386(10) -0.00111(6) -0.00060(6) -0.00016(6)
O1 0.00245(16) 0.00705(17) 0.00459(14) 0.000 0.000 0.00015(12)
O2 0.00430(17) 0.00438(15) 0.00507(14) 0.000 0.000 0.00015(12)
O3 0.00437(12) 0.00707(12) 0.00414(10) 0.00153(8) -0.00040(9) 0.00014(9)
 
_geom_special_details
;
 All esds (except the esd in the dihedral angle between two l.s. planes)
 are estimated using the full covariance matrix.  The cell esds are taken
 into account individually in the estimation of esds in distances, angles
 and torsion angles; correlations between esds in cell parameters are only
 used when they are defined by crystal symmetry.  An approximate (isotropic)
 treatment of cell esds is used for estimating esds involving l.s. planes.
;
 
loop_
 _geom_bond_atom_site_label_1
 _geom_bond_atom_site_label_2
 _geom_bond_distance
 _geom_bond_site_symmetry_2
 _geom_bond_publ_flag
Si O1 1.6163(6) . ?
Si O3 1.6380(4) 6_556 ?
Si O3 1.6380(4) . ?
Si O2 1.6556(6) 7_655 ?
Si Mg1 2.70110(19) . ?
Si Mg1 2.70110(19) 2 ?
Si Mg2 2.7959(4) 1_455 ?
Si Mg2 3.2551(4) 7_755 ?
Si Mg1 3.2595(2) 2_655 ?
Si Mg1 3.2595(2) 1_655 ?
Si Mg2 3.2696(4) . ?
Mg2 O2 2.0516(6) 1_655 ?
Mg2 O3 2.0652(4) 3 ?
Mg2 O3 2.0652(4) 8_666 ?
Mg2 O1 2.1760(6) . ?
Mg2 O3 2.2193(5) 6_656 ?
Mg2 O3 2.2193(5) 1_655 ?
Mg2 Mg1 3.2035(3) 1_655 ?
Mg2 Mg1 3.2035(3) 2_655 ?
Mg2 Mg1 3.5828(3) 3 ?
Mg1 O2 2.0733(4) 7_655 ?
Mg1 O2 2.0733(4) 3_455 ?
Mg1 O1 2.0879(4) 5_655 ?
Mg1 O1 2.0879(4) 1_455 ?
Mg1 O3 2.1375(4) 5 ?
Mg1 O3 2.1376(4) . ?
Mg1 Mg1 2.99670(10) 2 ?
Mg1 Mg1 2.99670(10) 2_554 ?
 
loop_
 _geom_angle_atom_site_label_1
 _geom_angle_atom_site_label_2
 _geom_angle_atom_site_label_3
 _geom_angle
 _geom_angle_site_symmetry_1
 _geom_angle_site_symmetry_3
 _geom_angle_publ_flag
O1 Si O3 116.042(19) . 6_556 ?
O1 Si O3 116.042(19) . . ?
O3 Si O3 104.90(3) 6_556 . ?
O1 Si O2 114.14(3) . 7_655 ?
O3 Si O2 101.90(2) 6_556 7_655 ?
O3 Si O2 101.90(2) . 7_655 ?
O1 Si Mg1 138.233(12) . . ?
O3 Si Mg1 105.559(18) 6_556 . ?
O3 Si Mg1 52.312(15) . . ?
O2 Si Mg1 50.091(14) 7_655 . ?
O1 Si Mg1 138.233(12) . 2 ?
O3 Si Mg1 52.312(15) 6_556 2 ?
O3 Si Mg1 105.559(18) . 2 ?
O2 Si Mg1 50.091(14) 7_655 2 ?
Mg1 Si Mg1 67.383(6) . 2 ?
O1 Si Mg2 139.01(2) . 1_455 ?
O3 Si Mg2 52.508(15) 6_556 1_455 ?
O3 Si Mg2 52.508(15) . 1_455 ?
O2 Si Mg2 106.85(2) 7_655 1_455 ?
Mg1 Si Mg2 71.269(7) . 1_455 ?
Mg1 Si Mg2 71.269(7) 2 1_455 ?
O1 Si Mg2 82.02(2) . 7_755 ?
O3 Si Mg2 118.658(15) 6_556 7_755 ?
O3 Si Mg2 118.658(15) . 7_755 ?
O2 Si Mg2 32.13(2) 7_655 7_755 ?
Mg1 Si Mg2 74.834(6) . 7_755 ?
Mg1 Si Mg2 74.834(6) 2 7_755 ?
Mg2 Si Mg2 138.971(9) 1_455 7_755 ?
O1 Si Mg1 32.593(10) . 2_655 ?
O3 Si Mg1 97.131(15) 6_556 2_655 ?
O3 Si Mg1 148.544(17) . 2_655 ?
O2 Si Mg1 95.070(19) 7_655 2_655 ?
Mg1 Si Mg1 141.246(8) . 2_655 ?
Mg1 Si Mg1 105.655(5) 2 2_655 ?
Mg2 Si Mg1 145.099(6) 1_455 2_655 ?
Mg2 Si Mg1 66.729(6) 7_755 2_655 ?
O1 Si Mg1 32.593(10) . 1_655 ?
O3 Si Mg1 148.544(17) 6_556 1_655 ?
O3 Si Mg1 97.131(15) . 1_655 ?
O2 Si Mg1 95.070(19) 7_655 1_655 ?
Mg1 Si Mg1 105.655(4) . 1_655 ?
Mg1 Si Mg1 141.246(8) 2 1_655 ?
Mg2 Si Mg1 145.099(6) 1_455 1_655 ?
Mg2 Si Mg1 66.729(6) 7_755 1_655 ?
Mg1 Si Mg1 54.734(4) 2_655 1_655 ?
O1 Si Mg2 35.84(2) . . ?
O3 Si Mg2 96.220(16) 6_556 . ?
O3 Si Mg2 96.220(16) . . ?
O2 Si Mg2 149.99(2) 7_655 . ?
Mg1 Si Mg2 145.139(4) . . ?
Mg1 Si Mg2 145.139(4) 2 . ?
Mg2 Si Mg2 103.167(11) 1_455 . ?
Mg2 Si Mg2 117.862(8) 7_755 . ?
Mg1 Si Mg2 58.767(6) 2_655 . ?
Mg1 Si Mg2 58.767(6) 1_655 . ?
O2 Mg2 O3 90.892(16) 1_655 3 ?
O2 Mg2 O3 90.892(16) 1_655 8_666 ?
O3 Mg2 O3 110.62(3) 3 8_666 ?
O2 Mg2 O1 176.92(3) 1_655 . ?
O3 Mg2 O1 90.859(16) 3 . ?
O3 Mg2 O1 90.859(16) 8_666 . ?
O2 Mg2 O3 96.411(19) 1_655 6_656 ?
O3 Mg2 O3 159.449(18) 3 6_656 ?
O3 Mg2 O3 88.514(9) 8_666 6_656 ?
O1 Mg2 O3 81.105(18) . 6_656 ?
O2 Mg2 O3 96.41(2) 1_655 1_655 ?
O3 Mg2 O3 88.514(10) 3 1_655 ?
O3 Mg2 O3 159.449(18) 8_666 1_655 ?
O1 Mg2 O3 81.105(18) . 1_655 ?
O3 Mg2 O3 71.63(2) 6_656 1_655 ?
O2 Mg2 Si 99.54(2) 1_655 1_655 ?
O3 Mg2 Si 123.950(13) 3 1_655 ?
O3 Mg2 Si 123.950(13) 8_666 1_655 ?
O1 Mg2 Si 77.384(17) . 1_655 ?
O3 Mg2 Si 35.846(10) 6_656 1_655 ?
O3 Mg2 Si 35.846(10) 1_655 1_655 ?
O2 Mg2 Mg1 137.560(14) 1_655 1_655 ?
O3 Mg2 Mg1 83.146(12) 3 1_655 ?
O3 Mg2 Mg1 130.529(15) 8_666 1_655 ?
O1 Mg2 Mg1 40.267(11) . 1_655 ?
O3 Mg2 Mg1 78.497(12) 6_656 1_655 ?
O3 Mg2 Mg1 41.687(11) 1_655 1_655 ?
Si Mg2 Mg1 52.987(6) 1_655 1_655 ?
O2 Mg2 Mg1 137.560(14) 1_655 2_655 ?
O3 Mg2 Mg1 130.529(15) 3 2_655 ?
O3 Mg2 Mg1 83.146(12) 8_666 2_655 ?
O1 Mg2 Mg1 40.267(11) . 2_655 ?
O3 Mg2 Mg1 41.687(11) 6_656 2_655 ?
O3 Mg2 Mg1 78.497(12) 1_655 2_655 ?
Si Mg2 Mg1 52.987(6) 1_655 2_655 ?
Mg1 Mg2 Mg1 55.773(5) 1_655 2_655 ?
O2 Mg2 Si 25.412(16) 1_655 7_765 ?
O3 Mg2 Si 76.698(13) 3 7_765 ?
O3 Mg2 Si 76.698(13) 8_666 7_765 ?
O1 Mg2 Si 157.665(19) . 7_765 ?
O3 Mg2 Si 116.458(14) 6_656 7_765 ?
O3 Mg2 Si 116.458(14) 1_655 7_765 ?
Si Mg2 Si 124.951(10) 1_655 7_765 ?
Mg1 Mg2 Si 151.083(4) 1_655 7_765 ?
Mg1 Mg2 Si 151.083(4) 2_655 7_765 ?
O2 Mg2 Si 157.30(2) 1_655 . ?
O3 Mg2 Si 76.470(14) 3 . ?
O3 Mg2 Si 76.470(14) 8_666 . ?
O1 Mg2 Si 25.783(15) . . ?
O3 Mg2 Si 101.947(14) 6_656 . ?
O3 Mg2 Si 101.947(14) 1_655 . ?
Si Mg2 Si 103.167(11) 1_655 . ?
Mg1 Mg2 Si 60.459(6) 1_655 . ?
Mg1 Mg2 Si 60.459(6) 2_655 . ?
Si Mg2 Si 131.883(10) 7_765 . ?
O2 Mg2 Mg1 79.312(16) 1_655 3 ?
O3 Mg2 Mg1 32.126(12) 3 3 ?
O3 Mg2 Mg1 80.843(14) 8_666 3 ?
O1 Mg2 Mg1 103.469(16) . 3 ?
O3 Mg2 Mg1 168.419(11) 6_656 3 ?
O3 Mg2 Mg1 119.354(10) 1_655 3 ?
Si Mg2 Mg1 155.183(2) 1_655 3 ?
Mg1 Mg2 Mg1 111.950(5) 1_655 3 ?
Mg1 Mg2 Mg1 139.908(9) 2_655 3 ?
Si Mg2 Mg1 56.695(6) 7_765 3 ?
Si Mg2 Mg1 80.088(7) . 3 ?
O2 Mg1 O2 180.00(3) 7_655 3_455 ?
O2 Mg1 O1 93.480(16) 7_655 5_655 ?
O2 Mg1 O1 86.520(16) 3_455 5_655 ?
O2 Mg1 O1 86.520(16) 7_655 1_455 ?
O2 Mg1 O1 93.480(16) 3_455 1_455 ?
O1 Mg1 O1 180.00(3) 5_655 1_455 ?
O2 Mg1 O3 105.213(17) 7_655 5 ?
O2 Mg1 O3 74.787(17) 3_455 5 ?
O1 Mg1 O3 85.104(19) 5_655 5 ?
O1 Mg1 O3 94.896(19) 1_455 5 ?
O2 Mg1 O3 74.787(17) 7_655 . ?
O2 Mg1 O3 105.213(17) 3_455 . ?
O1 Mg1 O3 94.896(19) 5_655 . ?
O1 Mg1 O3 85.104(19) 1_455 . ?
O3 Mg1 O3 180.0 5 . ?
O2 Mg1 Si 142.230(15) 7_655 5 ?
O2 Mg1 Si 37.770(15) 3_455 5 ?
O1 Mg1 Si 81.018(15) 5_655 5 ?
O1 Mg1 Si 98.982(15) 1_455 5 ?
O3 Mg1 Si 37.330(10) 5 5 ?
O3 Mg1 Si 142.670(10) . 5 ?
O2 Mg1 Si 37.770(15) 7_655 . ?
O2 Mg1 Si 142.230(15) 3_455 . ?
O1 Mg1 Si 98.982(15) 5_655 . ?
O1 Mg1 Si 81.018(15) 1_455 . ?
O3 Mg1 Si 142.671(10) 5 . ?
O3 Mg1 Si 37.330(10) . . ?
Si Mg1 Si 180.0 5 . ?
O2 Mg1 Mg1 43.724(11) 7_655 2 ?
O2 Mg1 Mg1 136.276(11) 3_455 2 ?
O1 Mg1 Mg1 135.859(11) 5_655 2 ?
O1 Mg1 Mg1 44.141(11) 1_455 2 ?
O3 Mg1 Mg1 95.361(10) 5 2 ?
O3 Mg1 Mg1 84.639(10) . 2 ?
Si Mg1 Mg1 123.692(3) 5 2 ?
Si Mg1 Mg1 56.309(3) . 2 ?
O2 Mg1 Mg1 136.276(11) 7_655 2_554 ?
O2 Mg1 Mg1 43.724(11) 3_455 2_554 ?
O1 Mg1 Mg1 44.141(11) 5_655 2_554 ?
O1 Mg1 Mg1 135.859(11) 1_455 2_554 ?
O3 Mg1 Mg1 84.639(10) 5 2_554 ?
O3 Mg1 Mg1 95.361(10) . 2_554 ?
Si Mg1 Mg1 56.308(3) 5 2_554 ?
Si Mg1 Mg1 123.691(3) . 2_554 ?
Mg1 Mg1 Mg1 180.0 2 2_554 ?
O2 Mg1 Mg2 84.293(13) 7_655 1_455 ?
O2 Mg1 Mg2 95.707(13) 3_455 1_455 ?
O1 Mg1 Mg2 137.653(16) 5_655 1_455 ?
O1 Mg1 Mg2 42.347(16) 1_455 1_455 ?
O3 Mg1 Mg2 136.332(12) 5 1_455 ?
O3 Mg1 Mg2 43.667(12) . 1_455 ?
Si Mg1 Mg2 124.257(6) 5 1_455 ?
Si Mg1 Mg2 55.743(7) . 1_455 ?
Mg1 Mg1 Mg2 62.114(2) 2 1_455 ?
Mg1 Mg1 Mg2 117.886(2) 2_554 1_455 ?
O2 Mg1 Mg2 95.707(13) 7_655 5_655 ?
O2 Mg1 Mg2 84.293(13) 3_455 5_655 ?
O1 Mg1 Mg2 42.347(16) 5_655 5_655 ?
O1 Mg1 Mg2 137.653(16) 1_455 5_655 ?
O3 Mg1 Mg2 43.668(12) 5 5_655 ?
O3 Mg1 Mg2 136.333(12) . 5_655 ?
Si Mg1 Mg2 55.743(6) 5 5_655 ?
Si Mg1 Mg2 124.257(7) . 5_655 ?
Mg1 Mg1 Mg2 117.886(2) 2 5_655 ?
Mg1 Mg1 Mg2 62.114(2) 2_554 5_655 ?
Mg2 Mg1 Mg2 180.0 1_455 5_655 ?
Si O1 Mg1 122.76(2) . 2_655 ?
Si O1 Mg1 122.76(2) . 1_655 ?
Mg1 O1 Mg1 91.72(2) 2_655 1_655 ?
Si O1 Mg2 118.37(3) . . ?
Mg1 O1 Mg2 97.39(2) 2_655 . ?
Mg1 O1 Mg2 97.39(2) 1_655 . ?
Si O2 Mg2 122.46(3) 7_665 1_455 ?
Si O2 Mg1 92.14(2) 7_665 4 ?
Mg2 O2 Mg1 124.214(16) 1_455 4 ?
Si O2 Mg1 92.14(2) 7_665 3 ?
Mg2 O2 Mg1 124.214(16) 1_455 3 ?
Mg1 O2 Mg1 92.55(2) 4 3 ?
Si O3 Mg2 124.50(3) . 3_455 ?
Si O3 Mg1 90.358(18) . . ?
Mg2 O3 Mg1 116.957(18) 3_455 . ?
Si O3 Mg2 91.646(18) . 1_455 ?
Mg2 O3 Mg2 129.046(18) 3_455 1_455 ?
Mg1 O3 Mg2 94.646(18) . 1_455 ?
 
_refine_diff_density_max    1.080
_refine_diff_density_min   -0.618
_refine_diff_density_rms    0.164

_shelx_res_file
;
TITL    OLI_CHR_1 mask 4.20-4.05
    Oli_CHR_1_DC.res
    created by SHELXL-2017/1 at 18:25:23 on 30-Nov-2021
CELL   0.71073      4.7615   10.2003    5.9934   90.000   90.000   90.000
ZERR         8      0.0002    0.0003    0.0002    0.000    0.000    0.000
LATT  1
SYMM -X,-Y,1/2+Z
SYMM 1/2+X,1/2-Y,-Z
SYMM 1/2-X,1/2+Y,1/2-Z
SFAC MG+2  3.4988 2.1676 3.8378 4.7542 1.3284 .185 .8497 =
   10.1411  .4853   .0420  .0360  165.  1.60  24.305
SFAC SI+4 4.43918  1.64167 3.20345  3.43757 1.19453  .2149  .416530 =
    6.65365   .746297 .0720 .0710  310.  1.17   28.0855
SFAC FE+2  11.0424  4.6538  7.374  .3053  4.1346 12.0546  .4399 =
   31.2809  1.0097  .3010 .8450  3490.  1.24   55.847
SFAC O-2    2.5371  5.7271  4.3991  17.17999  1.9535  .2189  1.2957  =
   44.606  -.205  .0080  .0060  32.5  .66  15.9994
UNIT 1 1 1 1
LIST 6
L.S.      7
ACTA
FMAP      2
BOND 0.5
SHEL 999 0.4
PLAN     25
OMIT 5 2 0
OMIT 0 6 0
OMIT 2   0   0
OMIT     1   1   0
OMIT     2   2   1
OMIT    10   3   3
OMIT     1   1   1
OMIT  10   2   0
OMIT   5   4   0
OMIT  10   4   0
OMIT   5   8   0
OMIT   5  10   0
OMIT   0  12   0
OMIT   5  14   0
OMIT   9   1   1
OMIT   9   7   1
OMIT   2  14   1
OMIT   1  15   1
OMIT   0  18   1
OMIT   1  21   1
OMIT   8   4   2
OMIT   8   5   2
OMIT   3   8   2
OMIT   8  10   2
OMIT   2  15   2
OMIT   2  21   2
OMIT   9   2   3
OMIT   7   3   3
OMIT   1   6   3
OMIT   7  12   3
OMIT   4  16   3
OMIT   5  16   3
OMIT   2  17   3
OMIT   1  18   3
OMIT   5   1   4
OMIT   5   5   4
OMIT   1  10   4
OMIT   1  11   4
OMIT   5  11   4
OMIT   5  17   4
OMIT   9   4   5
OMIT   6  10   5
OMIT   1  12   5
OMIT   4  14   5
OMIT   5   4   6
OMIT   6   9   6
OMIT   3  10   6
OMIT   2  12   6
OMIT   6   5   7
OMIT   2   5   9
OMIT   4   7  10
SUMP 1 0.001 1 2 1 3
SUMP 1 0.001 1 4 1 5
WGHT    0.036700    0.056800
EXTI    0.022048
FVAR       1.84231   0.93051   0.06943   0.92063   0.07918
SI    2    0.426596    0.094286    0.250000    10.50000    0.00191    0.00453 =
         0.00296    0.00000    0.00000    0.00011
MG2   1    0.989967    0.277552    0.250000    20.50000    0.00537    0.00529 =
         0.00462    0.00000    0.00000    0.00019
FE2   3    0.989967    0.277552    0.250000    30.50000    0.00537    0.00529 =
         0.00462    0.00000    0.00000    0.00019
MG1   1    0.000000    0.000000    0.000000    40.50000    0.00396    0.00755 =
         0.00386   -0.00111   -0.00060   -0.00016
FE1   3    0.000000    0.000000    0.000000    50.50000    0.00396    0.00755 =
         0.00386   -0.00111   -0.00060   -0.00016
O1    4    0.766001    0.091598    0.250000    10.50000    0.00245    0.00705 =
         0.00459    0.00000    0.00000    0.00015
O2    4    0.220982    0.447329    0.250000    10.50000    0.00430    0.00438 =
         0.00507    0.00000    0.00000    0.00015
O3    4    0.278057    0.163352    0.033324    11.00000    0.00437    0.00707 =
         0.00414    0.00153   -0.00040    0.00014
exyz MG1 FE1
eadp MG1 FE1
exyz MG2 FE2
eadp MG2 FE2

HKLF      4


REM     OLI_CHR_1 mask 4.20-4.05
REM R1 =  0.0283 for    1432 Fo > 4sig(Fo)  and  0.0325 for all    1627 data
REM     45 parameters refined using      2 restraints

END

WGHT      0.0370      0.0666

REM Highest difference peak  1.080,  deepest hole -0.618,  1-sigma level  0.164
Q1    1   0.4275  0.0424  0.2500  10.50000  0.05    1.08
Q2    1   0.3518  0.1340  0.1355  11.00000  0.05    1.01
Q3    1   0.4230  0.1462  0.2500  10.50000  0.05    0.93
Q4    1   0.9864  0.2285  0.2500  10.50000  0.05    0.74
Q5    1   0.9963  0.3302  0.2500  10.50000  0.05    0.71
Q6    1   0.3998  0.0676  0.1271  11.00000  0.05    0.71
Q7    1   0.0062  0.0498 -0.0035  11.00000  0.05    0.63
Q8    1   0.5076  0.0911  0.1875  11.00000  0.05    0.60
Q9    1   0.1786  0.5006  0.2500  10.50000  0.05    0.59
Q10   1  -0.0879 -0.0032 -0.0637  11.00000  0.05    0.58
Q11   1   0.6321  0.1011  0.2500  10.50000  0.05    0.53
Q12   1   0.3587  0.0256  0.1792  11.00000  0.05    0.51
Q13   1   0.7763  0.0462  0.2500  10.50000  0.05    0.51
Q14   1   1.0785  0.2809  0.2006  11.00000  0.05    0.51
Q15   1   0.2659  0.0722  0.2500  10.50000  0.05    0.50
Q16   1   0.0622  0.0326  0.1162  11.00000  0.05    0.50
Q17   1   0.0534  0.4949  0.2500  10.50000  0.05    0.50
Q18   1   0.9069  0.2763  0.1567  11.00000  0.05    0.50
Q19   1   1.0705  0.2275  0.1426  11.00000  0.05    0.50
Q20   1   0.3189  0.0350  0.2500  10.50000  0.05    0.48
Q21   1   0.5472  0.0430  0.2500  10.50000  0.05    0.47
Q22   1  -0.0884  0.0069  0.0795  11.00000  0.05    0.45
Q23   1   0.0980  0.1426  0.1543  11.00000  0.05    0.43
Q24   1   0.8358  0.0490  0.1405  11.00000  0.05    0.43
Q25   1   1.1243  0.2553  0.2500  10.50000  0.05    0.43
;
_shelx_res_checksum   94708

_shelx_hkl_file
;
   0   0  -1 0.17268 0.99925   1
   0   0   1 0.21422 1.07944   3
   0   0   1 0.75639 1.24612   7
   0   0  -1 1.02876 0.72386   2
   0   0   1 1.27246 0.72865   6
   0   0  -2 6298.22 423.149   9
   0   0  -2 6857.76 422.632   2
   0   0   2 6528.36 423.455   3
   0   0  -2 5046.65 422.771   1
   0   0   2 7455.47 423.927   7
   0   0   2 6403.61 422.415   6
   0   0  -2 5751.43 421.819  10
   0   0   3 0.32369 4.29360   3
   0   0  -3 0.29416 3.58835   9
   0   0  -3 1.52999 2.62798   2
   0   0  -3-2.73463 4.42428   1
   0   0   3 5.90519 6.47535   7
   0   0   3 0.13649 2.43507   6
   0   0   4 51448.3 3901.35   3
   0   0  -4 44836.4 3900.65   1
   0   0  -4 53504.4 3899.98   2
   0   0  -4 56429.1 3901.54   9
   0   0   5 21.6566 8.81320   3
   0   0   5-2.79732 6.40312   8
   0   0  -5 4.86733 9.05102   1
   0   0   5 6.27694 13.2272   7
   0   0  -5 3.18835 7.29085   9
   0   0  -6 4179.35 304.908   9
   0   0   6 4121.38 302.434  42
   0   0   6 4195.63 305.009  18
   0   0   6 4654.25 305.771   7
   0   0  -6 4963.46 306.225  25
   0   0   6 3673.04 304.081   3
   0   0   6 4421.16 303.411  37
   0   0   6 3795.83 302.403  20
   0   0   6 4159.00 304.892  11
   0   0   6 5138.37 303.431   8
   0   0   6 5212.82 304.533  35
   0   0  -6 5154.01 305.997  29
   0   0  -6 3916.86 303.418  19
   0   0  -6 3706.35 303.965   1
   0   0   7 6.39774 15.0016  18
   0   0   7 3.63600 10.1639  35
   0   0  -7 17.9994 14.1261   9
   0   0   7-11.0165 15.8592  11
   0   0  -7-1.62417 20.7128  25
   0   0  -7-10.2432 19.2594  29
   0   0   7 0.72198 11.1602   3
   0   0  -7 6.06797 14.9245  19
   0   0  -7 5.06403 14.7931   1
   0   0   7 9.76807 10.2583  37
   0   0   7 1.33836 8.31719  42
   0   0   7-8.34579 9.92094  20
   0   0  -8 11359.8 739.561  40
   0   0  -8 11881.1 740.614  29
   0   0   8 11264.9 738.200  37
   0   0   8 10033.2 739.737  18
   0   0   8 9920.00 739.390  11
   0   0  -8 11031.8 740.585  25
   0   0   8 10486.4 737.029  20
   0   0   8 8792.36 737.798   3
   0   0   8 10588.0 736.666  42
   0   0  -8 10349.7 739.473   9
   0   0  -8 9551.23 738.526   1
   0   0   8 12276.0 738.757  35
   0   0  -8 10144.6 738.296  19
   0   0   9-8.76187 14.6627  37
   0   0   9-6.36712 12.7275  20
   0   0  -9 1.10907 28.3819  25
   0   0  -9 0.86744 20.8115  19
   0   0  -9 4.09465 27.8799  29
   0   0   9 5.04824 11.3907  42
   0   0   9 1.05827 18.8135  11
   0   0   9-8.61266 19.4328  18
   0   0  -9 5.59355 20.9277  40
   0   0 -10 2113.51 165.084  29
   0   0  10 2482.62 162.288  37
   0   0  10 2382.37 160.348  42
   0   0 -10 1909.32 162.537  40
   0   0 -10 1772.18 164.575  25
   0   0  10 2209.19 164.215  11
   0   0  10 2354.37 161.151  20
   0   0 -10 2370.34 163.946  19
   0   0  10 2145.78 164.198  18
   0   0 -11 24.0698 25.8103  19
   0   0  11-6.10842 23.8207  11
   0   0  11 12.9465 13.9773  42
   0   0 -11 1.31291 32.3217  25
   0   0 -11 24.8915 34.5663  29
   0   0  11-1.24247 24.7056  18
   0   0 -11 11.7308 25.2230  40
   0   0  11-6.88381 15.2215  20
   0   0  11 3.71080 15.5623  37
   0   0  12 1793.95 141.692  11
   0   0 -12 1701.57 143.513  29
   0   0  12 2158.02 140.103  37
   0   0  12 1922.46 137.523  42
   0   0 -12 1724.26 144.217  25
   0   0  12 1826.90 142.371  18
   0   0 -12 1957.18 141.785  19
   0   0 -12 1626.21 140.032  40
   0   0  12 2063.09 138.995  20
   0   0  13 3.09510 22.8088  11
   0   0  13-1.48538 15.5006  20
   0   0 -13 4.72271 33.4717  25
   0   0  13-10.4862 24.0923  18
   0   0 -13-12.8729 27.2726  19
   0  -1   0 1.35493 0.54141   7
   0   1   0 1.02079 0.44416   8
   0  -1   0 0.50760 0.36237  44
   0  -1   0 2.58040 0.41113   2
   0   1   0 2.67918 0.65923   4
   0   1   0 0.71469 0.57608   6
   0   1  -1-0.43803 1.56835   1
   0   1   1 2.81696 1.16593   4
   0   1   1 0.34418 1.28574   3
   0  -1  -1 2.44111 1.23533   9
   0  -1  -1 0.55017 0.89492   2
   0  -1   1 5.89798 0.92396  44
   0   1  -1 0.55650 0.58388   2
   0   1   1 1.67669 1.30491   6
   0  -1   1 0.19520 1.15472   3
   0  -1  -1 0.25613 0.88602   1
   0  -1   1 1.17739 1.31826   7
   0  -1  -1 1.07686 0.55664  44
   0   1  -1 2.62723 0.96015   9
   0  -1  -2 0.81748 1.29856  10
   0  -1  -2 4.09467 2.02347   2
   0   1  -2 0.17951 2.00318   9
   0  -1   2-0.59944 2.20892   3
   0   1  -2 1.26290 3.04706   1
   0   1  -2 3.44183 1.38889   2
   0  -1   2 2.55627 0.92970   6
   0   1   2-1.63185 2.95941   3
   0  -1  -2 0.40495 2.89711   9
   0   1   2 1.57690 2.42711   7
   0   1   2 0.89738 2.07334   6
   0   1   3 0.35001 3.89473   3
   0  -1  -3 1.89684 3.19518   1
   0  -1  -3 1.43362 3.24414   2
   0  -1   3-2.00984 5.90949   7
   0   1  -3 5.67783 3.30798   9
   0  -1  -3-0.92518 3.62205   9
   0   1  -3-2.58248 2.69625   2
   0   1   3 10.6036 6.06101   7
   0   1  -3-2.20433 4.79652   1
   0   1   3-0.37852 3.23511   6
   0  -1   3 2.11087 4.01238   3
   0  -1   4 1.12442 9.05805   7
   0   1   4 2.56502 9.29095   7
   0  -1   4 0.70028 2.76199  44
   0  -1   4 3.99569 6.32922   3
   0  -1  -4 4.62435 5.55947   9
   0   1   4-0.41759 6.48449   8
   0   1   4 0.68597 4.39450   6
   0   1   4 8.73863 7.25359   3
   0  -1  -4 4.84991 5.33133   1
   0   1  -4-4.39590 6.04996   9
   0   1  -4-4.92538 6.06608   1
   0  -1  -4 2.29377 4.82548   2
   0  -1  -5 6.70586 7.58742   1
   0  -1   5 4.98135 6.86810   3
   0  -1   5-0.55493 5.70396   8
   0  -1  -5 18.3027 9.16726   9
   0   1  -5-5.68574 6.94095   9
   0   1   5-0.44069 8.73850   8
   0  -1   5-0.39893 3.49223  44
   0   1  -5-0.49585 8.46002   1
   0   1   5 0.55574 11.4671   7
   0   1   5 2.83515 7.77301   3
   0  -1   5 18.6547 12.3252   7
   0  -1  -6-1.79493 10.2088   1
   0   1   6 4.68175 8.39582  37
   0   1   6-0.66748 11.9687   3
   0   1   6-2.11845 8.71085  35
   0   1  -6 10.4188 9.83543   9
   0   1   6 15.6921 8.58477  20
   0  -1   6 13.2320 14.9346   7
   0   1  -6 1.21845 13.2276   1
   0  -1   6-0.62656 12.6625  18
   0  -1   6-6.16134 12.6651  11
   0   1   6 1.85789 6.88567  42
   0   1  -6 11.8476 13.2774  19
   0   1   6 9.85806 14.7504  18
   0  -1   6 0.59423 10.6376   3
   0  -1   6 2.12467 7.11001  42
   0   1   6 1.82583 8.65602   8
   0   1   6-6.23215 14.2521  11
   0  -1  -6-1.89818 15.5629  29
   0  -1  -6-2.62340 18.5683  25
   0   1  -6-1.35840 18.4989  25
   0  -1  -6 4.32987 10.1160  19
   0  -1  -6-3.31214 10.8727   9
   0  -1   6 0.37889 8.03576  20
   0  -1   6 1.72972 9.12646  37
   0   1  -7-16.1328 19.6014  29
   0   1  -7 22.4543 17.1977   1
   0   1   7 6.77459 17.4066  18
   0  -1   7 5.43722 10.4498  37
   0  -1  -7 5.70287 15.0436  40
   0  -1  -7-2.35678 13.1259   9
   0   1   7 2.96633 8.99989  20
   0  -1  -7 3.55477 14.1077  19
   0   1   7-4.53525 8.80620  42
   0  -1  -7 4.97727 13.9430   1
   0  -1   7-0.75234 14.6900  11
   0  -1   7 3.82308 15.1199  18
   0  -1   7-4.79631 9.84748  20
   0   1  -7 1.64430 21.2657  25
   0   1   7-0.62441 10.5144  35
   0   1   7 0.76402 11.4293   3
   0   1   7 9.99919 17.0175  11
   0  -1   7-3.45032 12.0349   3
   0  -1  -7 42.8101 20.5857  29
   0   1  -7 25.7289 13.6457   9
   0   1  -7 2.49147 15.4166  19
   0  -1  -7-1.61323 19.4257  25
   0   1   7-2.27875 9.93612  37
   0  -1   7 5.84062 10.2230  35
   0  -1   7 7.02812 8.41802  42
   0  -1  -8-5.89506 18.6999  40
   0   1  -8-5.50888 17.0660  40
   0   1   8 7.72262 18.3852  11
   0   1   8-4.69348 12.3423  37
   0  -1   8 10.7830 17.3683  18
   0  -1  -8 3.35134 19.7760   1
   0  -1  -8 9.48238 18.0043  19
   0   1   8-1.82764 11.1962  20
   0  -1  -8-12.2449 24.2038  25
   0   1  -8 6.30341 16.1180   9
   0  -1   8 11.4938 17.1388  11
   0  -1  -8 2.60024 19.5523  28
   0  -1  -8 16.4897 24.6005  29
   0  -1   8-3.18882 13.3961   3
   0   1   8 2.19490 9.65388  42
   0   1   8-4.34858 14.8930   3
   0  -1   8-5.33296 10.9250  20
   0   1  -8 5.85439 22.4081  29
   0  -1   8-3.17074 10.0044  42
   0   1   8 8.82941 18.9070  18
   0   1   8 8.67564 12.1487  35
   0   1  -8 4.47877 18.7022  19
   0  -1   8-7.59934 11.2967  37
   0  -1  -8 6.34219 17.5377   9
   0   1  -8 11.7811 20.2651   1
   0   1  -8-11.3941 24.3186  25
   0  -1  -9 20.8600 20.8527  19
   0   1   9-14.5552 15.5384  35
   0  -1   9-10.4220 19.6701  18
   0  -1   9 9.90059 11.0193  42
   0  -1   9 2.07045 12.2268  20
   0  -1  -9 1.07317 28.3591  29
   0   1   9 10.4487 14.3864  37
   0  -1   9-1.02444 18.6142  11
   0   1  -9-0.88765 21.1753  19
   0   1  -9 11.1058 26.8947  25
   0  -1  -9-2.21647 27.6459  25
   0   1  -9 1.80327 19.7096  40
   0   1   9 1.10240 20.6791  11
   0   1   9-3.17988 11.0307  42
   0   1  -9 8.79540 28.2053  29
   0  -1   9-11.2193 13.4556  37
   0  -1  -9-9.66112 21.2387  40
   0   1   9 1.12145 20.6433  18
   0   1   9 6.36969 12.0292  20
   0  -1  10 6.35084 13.5191  20
   0   1 -10-8.81861 29.4451  25
   0   1  10-13.2078 21.7096  11
   0   1 -10-8.91416 22.9884  19
   0  -1  10-4.21016 12.4753  42
   0   1  10 7.26641 11.9022  42
   0  -1  10 9.20529 19.9582  18
   0   1  10 7.33449 13.1852  20
   0  -1 -10 11.6525 23.1429  19
   0  -1  10 4.23938 14.1660  37
   0   1  10-9.59872 16.3695  35
   0   1 -10 9.58197 30.1212  29
   0  -1 -10 14.7971 24.2576  40
   0  -1 -10 16.4029 31.9336  29
   0  -1  10-5.65524 20.9867  11
   0   1 -10 6.94118 22.2600  40
   0  -1 -10 33.9975 31.6842  25
   0   1  10-10.1706 16.7731  37
   0   1  10 14.6584 21.7162  18
   0   1 -11 1.06602 25.8893  19
   0  -1  11 0.85750 15.1949  37
   0  -1 -11 41.8473 33.7983  25
   0   1  11-5.09387 25.4950  18
   0  -1  11 20.0547 13.9909  20
   0  -1 -11-8.69194 34.3355  29
   0   1 -11 1.03060 25.2585  40
   0  -1 -11-3.29382 26.1186  40
   0  -1  11-1.47767 12.8186  42
   0   1 -11 13.1223 32.9922  25
   0  -1  11 1.21487 23.9902  18
   0   1 -11 14.6322 33.1988  29
   0   1  11 4.27916 15.2959  20
   0  -1 -11-3.14129 26.4623  19
   0   1  11 8.76529 24.9669  11
   0  -1  11 19.1123 23.9147  11
   0   1  11 1.52893 13.3346  42
   0   1  11-0.94386 16.9544  37
   0  -1 -12-2.60414 33.7326  25
   0  -1  12 0.83588 14.9108  20
   0   1 -12-17.5799 26.2861  40
   0  -1  12-11.7323 14.4788  42
   0  -1  12-12.8004 23.9180  11
   0   1  12-2.81308 18.6693  37
   0   1 -12 5.26406 32.9720  25
   0   1  12-7.35435 25.5791  18
   0  -1  12 14.1926 24.2783  18
   0   1  12-2.55224 15.8598  20
   0   1  12 6.80959 13.9053  42
   0  -1 -12 4.85679 37.0425  29
   0   1  12 13.2662 25.0106  11
   0   1 -12-1.03444 27.7995  19
   0  -1  12 3.37890 16.3984  37
   0  -1 -12 12.6709 26.6376  40
   0   1  13-7.41266 23.8236  18
   0  -1  13-12.1825 23.7289  11
   0   1  13 2.25749 15.9768  20
   0   1  13 3.12572 24.3044  11
   0  -1  13-1.03228 22.9983  18
   0  -1 -13-3.48583 32.9183  25
   0   1 -13 27.3020 33.6294  25
   0  -1  13-11.1912 15.0981  20
   0   1 -13-2.74601 26.8797  19
   0  -2   0 2408.31 196.376   2
   0   2   0 3267.41 196.867   6
   0  -2   0 2912.87 196.679   7
   0  -2   0 2888.75 196.481  44
   0   2   0 2884.48 196.540   8
   0   2   0 2906.39 196.624   4
   0  -2  -1 6361.16 488.071   1
   0  -2  -1 8023.60 488.319   9
   0   2  -1 8669.87 488.330   1
   0   2   1 7942.14 488.466   4
   0  -2   1 6850.91 488.689   7
   0  -2  -1 6611.96 488.040   2
   0   2  -1 7192.40 487.594   8
   0   2   1 7486.89 488.774   6
   0  -2   1 7650.91 488.132   3
   0  -2  -1 7430.16 487.862  44
   0   2   1 7510.37 488.899   8
   0  -2   1 6585.24 488.032  44
   0   2  -1 5780.15 487.636   4
   0   2   2 402.038 26.8588   4
   0   2   2 368.688 27.0034   6
   0  -2  -2 343.980 26.3572   2
   0   2  -2 366.368 25.3455  43
   0  -2   2 347.495 27.3279   7
   0  -2   2 377.457 26.7535   3
   0  -2  -2 312.658 26.3667   1
   0   2  -2 312.104 25.7058   4
   0  -2   2 308.384 26.0237  44
   0  -2  -2 387.815 27.0321   9
   0  -2  -2 446.176 25.9298  44
   0   2  -2 402.318 26.8147   1
   0  -2   3 119.488 11.7716  44
   0   2  -3 167.314 13.7336   1
   0   2   3 151.485 11.6688   7
   0   2  -3 116.677 11.8158   4
   0   2  -3 154.501 13.1162   9
   0  -2   3 137.266 13.1480   3
   0  -2  -3 154.983 13.8884   9
   0  -2  -3 140.638 12.8982   1
   0   2   3 154.571 13.1249   6
   0  -2  -3 156.110 12.7371   2
   0   2   3 223.627 16.0843   8
   0   2  -3 180.675 12.1712   2
   0   2  -4 1551.59 114.637   1
   0  -2  -4 1693.14 115.326   9
   0   2   4 1570.16 113.938   6
   0  -2   4 1514.93 114.506   3
   0  -2   4 1625.38 116.196   7
   0  -2   4 1370.94 112.891  44
   0   2  -4 1579.49 114.707   9
   0  -2  -4 1516.05 114.381   1
   0   2   4 1813.08 113.547   7
   0  -2  -4 1689.56 114.005   2
   0  -2  -5 4112.37 272.800   1
   0  -2  -5 4396.66 273.771   9
   0   2  -5 2985.82 270.772   4
   0  -2   5 3662.10 270.320  44
   0  -2   5 3934.40 272.584   3
   0   2  -5 3584.39 272.622   1
   0   2  -5 4151.24 273.183   9
   0  -2   5 4411.06 274.870   7
   0   2   6 1345.60 79.5059  35
   0  -2   6 1240.35 77.9809  37
   0   2  -6 871.707 78.4419   1
   0  -2  -6 1089.97 78.8927   1
   0   2  -6 968.429 78.2163  19
   0   2   6 1042.37 77.0459  42
   0  -2  -6 1273.62 80.3540  40
   0  -2   6 1189.42 79.7588  18
   0   2  -6 1051.18 79.9104  34
   0  -2   6 1142.78 80.7910   7
   0   2  -6 783.821 76.5527   4
   0  -2  -6 1108.73 78.1429  19
   0  -2   6 1049.89 78.6086   3
   0   2  -6 938.499 78.6429   9
   0   2   6 931.728 77.3017  37
   0  -2   6 1181.42 79.6610  11
   0  -2   6 997.559 76.5537  42
   0  -2  -6 1138.06 79.9699   9
   0  -2  -6 1306.46 81.5974  25
   0   2   6 1040.33 77.4065  20
   0   2  -6 905.675 78.3879  41
   0  -2   6 1020.18 76.9674  20
   0   2   6 1393.18 79.8673   8
   0   2  -7 29.3573 22.9093  25
   0  -2   7 35.3419 12.1243   3
   0   2  -7 35.6659 17.2792  19
   0  -2  -7 37.0465 14.5710  19
   0   2   7 41.0055 13.1371  35
   0   2  -7 30.9802 13.5362   9
   0  -2   7 37.9415 11.1363  20
   0  -2  -7 39.6203 16.1577   9
   0   2  -7 59.7856 21.3135  29
   0  -2  -7 36.1682 21.5768  25
   0  -2   7 35.3289 10.3867  42
   0  -2   7 23.6716 15.5933   7
   0   2   7 34.7461 11.6622  20
   0   2   7 15.5352 10.4423  42
   0   2  -7 34.3042 15.8900   1
   0  -2   7 29.0775 15.4235  11
   0  -2  -7 47.9398 18.2706  28
   0  -2   7 36.2024 15.4599  18
   0  -2   7 56.8852 12.3948  37
   0  -2  -7 33.6301 14.5712   1
   0   2  -7 42.0573 18.6768  34
   0   2   7 31.2660 13.6903  37
   0   2  -8 936.110 68.8685  29
   0  -2   8 864.679 66.8700  11
   0   2   8 814.686 64.7220  37
   0  -2   8 861.187 63.4876  20
   0  -2  -8 917.711 66.3804  19
   0  -2  -8 805.074 69.7967  25
   0   2   8 828.953 63.1572  42
   0   2  -8 746.710 65.6642  19
   0  -2   8 966.292 64.6353  37
   0   2  -8 717.485 65.9177   9
   0  -2  -8 824.026 67.4742   9
   0   2  -8 709.503 65.9804   1
   0  -2   8 846.489 62.8445  42
   0   2   8 961.289 66.0877  35
   0  -2   8 754.334 64.9960   3
   0  -2  -8 879.401 70.6426  29
   0  -2  -8 971.008 67.5037  28
   0   2   8 820.814 63.7178  20
   0  -2   8 833.446 66.9896  18
   0   2  -8 770.471 70.0376  25
   0   2  -8 644.473 66.3797  34
   0  -2  -9 1366.61 112.546  25
   0   2   9 1393.44 106.067  42
   0   2  -9 1395.49 112.373  25
   0  -2   9 1474.85 106.014  42
   0   2  -9 1295.49 110.735  29
   0   2   9 1361.27 107.456  37
   0   2   9 1412.80 106.848  20
   0  -2   9 1447.32 106.691  20
   0  -2  -9 1507.58 113.506  29
   0  -2   9 1445.49 110.266  18
   0   2  -9 1527.91 109.053  40
   0   2   9 1618.29 108.657  35
   0  -2  -9 1500.90 109.431  28
   0  -2  -9 1466.79 110.833  40
   0  -2   9 1604.06 107.778  37
   0   2  -9 1343.60 108.956  19
   0  -2   9 1356.88 109.484  11
   0   2 -10 275.617 45.1041  25
   0  -2 -10 393.347 47.1009  29
   0  -2  10 416.020 40.5904  11
   0   2  10 382.672 36.5574  37
   0   2  10 381.718 33.7464  42
   0   2 -10 369.616 40.3102  19
   0   2  10 427.915 35.6009  20
   0  -2  10 405.067 34.8511  20
   0  -2 -10 414.054 42.1692  40
   0   2  10 416.168 36.8113  35
   0   2 -10 362.283 44.8857  29
   0  -2  10 392.341 33.6461  42
   0  -2 -10 389.908 46.7209  25
   0  -2  10 372.590 40.4643  18
   0  -2  10 425.865 35.4197  37
   0   2 -11 3.92893 24.2203  40
   0  -2  11 10.8801 15.1307  37
   0   2 -11 25.4267 25.9509  19
   0  -2 -11 2.25007 27.6253  40
   0  -2 -11 9.06381 36.6487  29
   0   2  11 25.3622 16.1404  20
   0   2  11 38.5479 19.1368  37
   0  -2  11 51.4927 25.1136  11
   0   2 -11 39.2153 32.3406  25
   0  -2  11 16.8636 13.3038  42
   0  -2 -11 28.5003 33.3341  25
   0  -2  11 33.4670 15.7902  20
   0  -2  11 28.5660 23.8902  18
   0   2  11 36.0244 14.7021  42
   0   2  12 458.621 41.4380  42
   0   2 -12 393.657 46.6270  40
   0  -2 -12 433.551 48.5725  40
   0   2 -12 421.670 54.2537  25
   0  -2  12 512.972 48.3630  11
   0  -2 -12 366.060 51.9122  25
   0   2 -12 574.841 50.3356  19
   0   2  12 484.530 42.7051  20
   0  -2  12 516.744 48.9999  18
   0  -2  12 540.977 43.1621  37
   0  -2 -12 493.062 56.6120  29
   0   2  12 478.037 44.4506  37
   0  -2  12 540.145 41.6296  42
   0  -2  12 470.561 42.1014  20
   0   2 -13 304.091 36.6207  19
   0  -2  13 268.369 34.3751  18
   0  -2  13 273.957 34.2549  11
   0  -3   0 0.59685 1.01180  44
   0   3   0 0.52871 1.24243   8
   0  -3   0 0.51780 1.71038   7
   0   3   1 1.78318 2.57943   6
   0  -3   1 2.29788 2.40802   7
   0   3  -1 0.56637 2.72210   4
   0   3   1 5.17675 2.51523   4
   0   3  -1 1.69313 1.03008   6
   0  -3  -1 1.77108 1.21015  44
   0  -3   1 0.07429 1.12930   3
   0   3  -1 1.68549 0.95489   8
   0  -3  -1 1.67066 1.51763   9
   0  -3   1 3.70835 1.40528  44
   0  -3  -1 0.35623 1.17452   2
   0   3   1 0.62858 1.44180   3
   0   3  -1 1.90335 2.02841   1
   0   3   1 0.41733 2.44432   8
   0  -3  -1 0.91027 0.95553   7
   0  -3  -2 2.38261 2.21918   2
   0  -3  -2 4.18507 3.43045   9
   0  -3  -2 2.83038 2.08531   1
   0   3   2 9.02652 3.02374   4
   0   3   2 2.19640 4.57980   8
   0   3   2 1.02084 3.43957   3
   0  -3  -2 2.58085 1.45435  44
   0   3  -2 0.17850 2.09231   9
   0   3  -2 0.56158 3.53018   1
   0   3   2 0.84561 3.96507   6
   0  -3   2 5.50044 4.33348   7
   0  -3   2 0.93968 1.97658  44
   0  -3   2 0.33933 2.38907   3
   0   3  -2-0.07214 1.94035   4
   0   3   3-0.40591 5.58470   3
   0  -3   3-1.16096 2.64690  44
   0  -3   3 6.89195 4.31235   3
   0   3  -3 3.53219 2.52812   4
   0   3   3 3.54356 5.27049   6
   0  -3  -3-0.72829 3.52219   2
   0   3  -3 2.77237 5.30093   1
   0  -3  -3 9.89895 3.76519   1
   0   3  -3 11.7063 4.43973   9
   0  -3  -3 6.01154 5.35171   9
   0  -3   4 111.900 6.92955  44
   0  -3   4 220.338 14.9090   7
   0   3   4-4.96523 7.13299   6
   0  -3  -4-0.89458 8.16661   9
   0  -3  -4 0.74811 6.00747   1
   0  -3   4 127.857 5.83688   8
   0   3  -4 62.4422 9.70610   1
   0   3  -4 86.0877 6.29181   4
   0  -3   4 116.878 9.68080   3
   0   3   4-9.01777 10.4703   8
   0   3   4-0.54732 8.90913   3
   0   3   4 2.30694 1.79520   7
   0  -3  -4 1.88644 5.36425   2
   0   3  -5-0.49666 9.17299   1
   0   3   5 0.67334 10.8039   3
   0   3  -5-1.86282 6.02729   4
   0  -3  -5 2.42309 7.50961   1
   0  -3  -5-4.50063 10.8275   9
   0  -3   5-2.73423 7.52560   3
   0  -3   5-3.19498 10.6559   7
   0  -3   5-3.83053 4.85176  44
   0   3   5-5.81982 11.2169   8
   0  -3  -6-5.68881 14.4976  28
   0   3   6-22.0974 16.8003  11
   0   3   6 27.2681 13.8349  13
   0   3  -6-10.9503 14.7425  19
   0  -3  -6 14.1109 17.9503  29
   0   3   6 16.8181 10.4506  35
   0  -3  -6 3.39910 11.2242   9
   0   3   6-8.35172 11.2249  14
   0   3   6 2.65665 8.05871  20
   0  -3   6-5.16504 12.3442  11
   0  -3  -6 7.98073 17.3824  25
   0   3   6-14.9913 12.1659  16
   0   3  -6 7.23827 12.4775  41
   0  -3   6-3.08440 8.74785  20
   0  -3   6 0.41002 9.73470  37
   0  -3   6 5.70273 12.8456   7
   0   3  -6 7.98681 13.6121   1
   0  -3   6 1.04857 7.46512  42
   0  -3   6-1.16730 12.1953  18
   0   3   6 6.28951 12.9545   3
   0  -3  -6 1.92765 13.7722  40
   0   3   6 0.40246 7.17956  42
   0   3   6-1.31650 11.5808   8
   0   3  -6 2.26693 20.9238  25
   0   3  -6 9.18717 16.4130  34
   0  -3   6-3.86567 9.91822   3
   0   3   6 12.4780 16.4486  18
   0   3  -7-12.2265 17.1236  19
   0   3   7 2.20606 9.88849  20
   0   3   7 9.67725 20.2203  11
   0  -3   7-5.04281 14.5576  18
   0  -3   7 2.41990 10.8059  20
   0  -3   7 2.98834 14.0573   7
   0   3  -7-6.04557 21.5634  25
   0  -3  -7 4.80610 20.7519  25
   0   3   7-3.37130 13.2393   8
   0   3  -7 4.39270 14.9315   1
   0   3   7-6.31612 18.1362   3
   0  -3   7 1.98536 11.0563   3
   0   3  -7-12.5502 19.9290  34
   0   3   7 1.09925 21.7657  36
   0  -3   7-10.6318 14.3609  11
   0  -3   7 8.70156 8.66246  42
   0   3   7 11.9128 9.42537  42
   0  -3  -7-4.02879 18.5929  28
   0  -3  -7-5.39446 17.8318  40
   0   3  -7-14.0721 20.8800  29
   0  -3  -7-4.31137 22.9451  29
   0   3   7-9.83418 20.0567  18
   0   3   7-1.20818 11.0485  37
   0  -3  -7 5.57063 15.4932   9
   0   3   7 14.9199 13.4840  35
   0   3   7 4.59444 15.0499  13
   0   3  -7-9.45060 14.2943  41
   0  -3   7-1.55683 10.9906  37
   0  -3   8-3.02659 14.6466   3
   0  -3  -8-33.9706 28.7340  25
   0   3  -8 24.4817 19.0527   1
   0   3   8-12.3203 13.3284  20
   0   3   8 15.6083 23.6688  18
   0   3  -8-23.3362 23.5229  29
   0  -3   8 8.40705 16.9211  11
   0   3   8 4.93068 17.0425   3
   0  -3   8 6.83939 10.9110  42
   0  -3  -8 22.7602 18.4464   9
   0  -3  -8 8.14201 20.5044  40
   0   3   8 20.8442 22.6072  11
   0  -3  -8-2.32679 22.6318  28
   0   3  -8-14.6192 20.5218  19
   0  -3   8-6.83592 17.5183  18
   0  -3   8-1.15401 11.5358  20
   0   3   8 5.31853 13.9415  37
   0   3  -8-7.06698 27.9947  25
   0   3   8 22.4721 15.5967  35
   0   3  -8-8.55275 21.3544  34
   0   3   8 3.50275 10.1809  42
   0  -3   8-1.80947 12.0257  37
   0   3   9-4.32256 15.4215  35
   0   3  -9-4.54471 21.6418  19
   0   3   9-0.74084 12.3770  20
   0   3   9 3.67164 23.3444  11
   0   3   9 13.6948 23.8177  18
   0   3   9-3.34166 11.9424  42
   0  -3  -9 6.60775 28.1593  25
   0   3  -9-6.71491 17.6469  40
   0  -3  -9-3.44700 25.0491  28
   0   3  -9-2.93606 24.7106  34
   0  -3   9 4.78341 13.1118  20
   0  -3   9-5.98652 20.2692  18
   0  -3   9 11.0404 11.2724  42
   0  -3   9 2.09173 12.5854  37
   0  -3   9 0.98070 19.0380  11
   0   3   9-3.47076 14.9132  37
   0   3  10-2.66688 24.2695  18
   0   3 -10 33.2033 23.9344  19
   0  -3 -10 18.6311 31.6803  25
   0  -3  10 1.11483 22.1362  18
   0   3  10-1.50577 12.8940  42
   0  -3  10-1.55107 13.5737  37
   0  -3 -10-0.92210 29.0842  28
   0   3  10 13.3948 14.5741  20
   0   3  10-10.4898 25.5286  11
   0  -3  10-1.09612 21.9439  11
   0  -3  10-3.89002 13.5200  20
   0   3  10 23.6079 17.3281  37
   0  -3 -10-12.7725 32.8484  29
   0   3  10-12.8960 16.0356  35
   0   3 -10 4.59048 21.4805  40
   0  -3  10 7.53570 11.8839  42
   0   3 -11 2.81570 22.7292  40
   0  -3  11 4.06963 14.2440  37
   0  -3  11-9.17725 22.7770  11
   0  -3  11 5.01281 14.8270  20
   0   3  11-1.02186 19.3450  37
   0   3  11-12.1486 18.6313  35
   0   3  11-1.73003 16.0247  20
   0   3  11 44.2849 27.7242  18
   0  -3  11-4.66700 24.7996  18
   0   3  11 7.91748 27.1226  11
   0  -3 -11-25.2341 29.8353  40
   0   3  11-2.34732 14.5408  42
   0  -3 -11 21.4719 37.8638  29
   0   3 -11 6.40269 27.7573  19
   0  -3 -11 3.82131 34.1282  25
   0  -3  11 2.90400 13.5554  42
   0  -3  12-3.20817 15.0681  20
   0  -3 -12-5.46533 27.5279  40
   0  -3  12 9.74347 13.1754  42
   0  -3 -12-2.59542 37.4049  29
   0   3 -12-15.3873 28.5854  19
   0  -3  12-18.9198 24.8481  11
   0   3  12 9.96502 14.8591  42
   0   3  12 12.5644 26.2855  18
   0   3  12-8.43029 17.3720  20
   0  -3  12-1.13119 24.8117  18
   0   3  12-24.7255 27.1779  11
   0  -3  12 9.45923 15.9290  37
   0   3  12 5.97960 18.9239  37
   0  -3 -12-24.9028 32.5694  25
   0  -4   0 20.5927 2.91684  44
   0  -4   0 23.3782 3.63322   7
   0   4   0 22.7456 3.82133   6
   0   4   0 29.9386 3.91082   8
   0  -4   0 38.7354 3.34705   2
   0   4   0 24.9839 4.20867   4
   0   4  -1 4660.02 332.618   8
   0   4  -1 4317.09 333.096   4
   0   4  -1 5146.07 332.757   6
   0  -4  -1 4993.78 332.699   9
   0   4   1 4253.93 333.723   8
   0   4   1 5509.95 332.683   3
   0  -4  -1 4643.87 332.647   7
   0  -4   1 4543.99 333.111  44
   0  -4  -1 4463.24 332.847  44
   0   4  -1 4661.19 332.662   9
   0   4  -1 5318.72 333.079   1
   0   4   1 4765.45 334.305   6
   0  -4   1 5763.49 332.507   3
   0  -4   1 3831.26 332.749   2
   0  -4   1 4308.70 333.737   7
   0  -4  -1 4123.81 332.943   2
   0   4   2 1449.77 103.171   3
   0   4   2 1488.69 104.615   8
   0  -4  -2 1417.15 102.924   9
   0   4  -2 1200.45 101.885   4
   0  -4  -2 1667.41 102.267  44
   0   4  -2 1498.30 101.406   6
   0   4  -2 1647.18 103.035   1
   0   4   2 1342.91 103.981   6
   0  -4   2 1603.83 102.548   3
   0   4   2 1472.35 103.371   4
   0  -4  -2 1229.57 102.539   1
   0  -4  -2 1505.20 102.756   2
   0   4  -2 1435.82 102.603   9
   0  -4   2 1427.23 103.884   7
   0  -4  -3 9836.09 613.416   2
   0   4   3 8474.26 614.351   3
   0  -4  -3 10199.3 614.348   9
   0   4  -3 7075.93 611.724   4
   0   4  -3 9551.79 613.500   1
   0   4  -3 9540.47 613.519   9
   0  -4   3 8796.80 612.867  44
   0   4   3 9141.20 614.529   6
   0   4   3 10736.1 616.999   8
   0  -4   3 9281.67 614.816   7
   0  -4   3 10037.3 613.357   3
   0   4   4 545.466 40.6940   6
   0  -4  -4 594.297 39.8836   2
   0   4  -4 503.697 37.8543   4
   0   4  -4 508.308 40.3337   1
   0   4   4 698.388 44.9039   8
   0  -4   4 518.331 41.4927   7
   0   4   4 484.761 41.8418   3
   0  -4  -4 521.039 40.9263   9
   0   4  -4 547.827 40.1139   9
   0  -4   4 496.852 38.7019  44
   0  -4   4 512.456 39.6406   3
   0   4  -5 807.183 62.8431   1
   0  -4   5 876.050 64.3100   7
   0  -4   5 907.338 62.4716   3
   0   4   5 808.386 64.9157   3
   0  -4   5 805.334 60.7475  44
   0  -4  -5 931.799 64.4875   9
   0   4  -5 857.145 62.8512   9
   0   4  -5 693.735 59.8795   4
   0   4   5 889.756 62.8052   6
   0  -4  -5 964.888 62.2758   2
   0   4   6 1177.64 102.195  42
   0   4   6 1314.27 107.521  18
   0   4  -6 1891.16 109.563  25
   0   4  -6 1413.22 106.309  34
   0   4   6 1437.86 103.254  20
   0  -4  -6 1585.63 105.919   9
   0   4   6 1326.25 107.467  11
   0  -4   6 1406.68 103.717   3
   0  -4   6 1306.31 105.043   7
   0  -4   6 1326.27 102.619  20
   0  -4   6 1615.58 105.008  18
   0   4   6 1948.73 108.585   8
   0   4   6 1471.98 104.943  14
   0   4  -6 1291.18 104.082   9
   0   4   6 1825.31 110.429  36
   0   4   6 1193.67 103.085  37
   0   4   6 1505.85 105.106  16
   0  -4   6 1693.89 103.301  37
   0  -4  -6 1807.91 106.615  28
   0   4   6 1561.97 107.146  13
   0   4  -6 1148.87 103.793   1
   0   4  -6 1241.26 104.356  41
   0   4   6 1698.13 105.367  35
   0  -4   6 1295.28 102.020  42
   0   4   6 1101.04 105.472   3
   0  -4   6 1590.05 104.863  11
   0  -4  -6 1675.30 106.537  40
   0   4  -6 1230.60 103.657  19
   0  -4  -6 1755.55 108.541  29
   0   4   7 2892.18 262.741   3
   0  -4  -7 3841.69 263.246   9
   0   4   7 3301.45 264.356  11
   0   4   7 3556.88 262.169  16
   0   4  -7 3313.34 261.200  19
   0  -4   7 3362.68 259.406  42
   0   4   7 3633.15 262.268  14
   0   4   7 3971.92 264.732  13
   0  -4  -7 4519.22 264.038  28
   0   4   7 4807.69 264.843   8
   0   4   7 3384.60 259.922  42
   0   4   7 4194.25 262.748  35
   0   4  -7 3199.35 261.794   9
   0   4   7 3323.75 264.662  18
   0   4  -7 2904.89 261.177   1
   0  -4  -7 4160.93 264.353  25
   0   4   7 4972.50 269.480  36
   0  -4   7 3753.04 260.054  20
   0  -4   7 4134.27 262.805  18
   0  -4   7 4039.61 262.494  11
   0   4   7 3464.04 260.497  20
   0  -4   7 3609.13 262.278   7
   0  -4  -7 4399.21 264.310  40
   0  -4   7 3659.73 261.371   3
   0  -4  -7 4561.54 266.362  29
   0   4  -7 3326.81 262.734  34
   0  -4   7 4312.12 260.889  37
   0   4  -7 2875.32 261.270  41
   0   4  -7 3992.13 265.057  25
   0  -4   8 314.555 30.4191  18
   0   4   8 177.045 30.2632   3
   0   4   8 223.315 26.9450  37
   0  -4  -8 293.086 36.4872  25
   0   4   8 291.732 31.9822  13
   0   4  -8 293.275 38.8454  25
   0   4   8 281.910 25.7416  42
   0  -4   8 270.050 25.8735  20
   0  -4   8 321.931 26.5315  37
   0   4   8 271.781 26.8104  20
   0  -4  -8 286.386 32.8043  40
   0  -4  -8 317.608 34.0955  28
   0  -4   8 268.479 25.2026  42
   0   4   8 268.021 34.9838  11
   0   4   8 345.690 29.6630  35
   0   4  -8 216.499 28.5069   9
   0   4  -8 210.893 31.7520   1
   0   4   8 232.466 34.2583  18
   0  -4   8 298.276 29.7798  11
   0  -4  -8 329.641 38.2553  29
   0   4  -8 203.440 30.8127  19
   0  -4  -8 310.288 30.7830   1
   0  -4   8 288.639 27.5908   3
   0   4  -8 249.551 33.5937  34
   0   4  -8 232.152 29.4544  41
   0   4  -9 160.865 34.3122  25
   0  -4   9 187.491 26.4442  11
   0  -4  -9 181.994 36.3924  29
   0  -4  -9 208.305 30.2797  40
   0   4   9 168.638 20.5626  42
   0   4  -9 147.722 24.1531  40
   0  -4   9 179.638 20.8405  20
   0   4   9 170.454 22.8054  35
   0  -4   9 193.520 21.2240  37
   0  -4   9 172.150 19.7441  42
   0   4  -9 123.401 29.4119  34
   0   4  -9 115.385 26.9234  19
   0   4   9 147.908 30.9307  18
   0   4   9 151.896 30.7237  11
   0  -4  -9 171.519 31.5493  28
   0  -4  -9 190.764 34.1514  25
   0   4   9 178.107 21.6265  20
   0   4   9 156.170 24.2685  37
   0  -4   9 213.373 27.6612  18
   0   4 -10 490.451 63.6758  34
   0  -4 -10 849.503 66.8343  40
   0   4 -10 758.519 63.0084  40
   0  -4  10 868.280 60.8720  37
   0   4  10 737.536 59.9874  42
   0  -4 -10 829.459 67.2501  28
   0   4  10 821.131 63.4609  37
   0   4  10 808.867 62.6296  35
   0  -4 -10 730.541 69.3425  25
   0  -4  10 809.006 60.5775  20
   0   4  10 649.253 66.7376  11
   0   4 -10 765.037 69.7322  25
   0   4  10 573.890 61.2389  20
   0   4 -10 730.236 64.4411  19
   0  -4  10 798.370 59.4255  42
   0  -4  10 817.410 65.2401  11
   0  -4  10 919.133 66.4653  18
   0   4  10 647.727 67.5742  18
   0  -4 -11 888.426 80.8700  29
   0  -4  11 945.157 68.1341  42
   0  -4 -11 1000.82 74.2030  19
   0   4  11 693.909 74.6281  11
   0   4  11 808.281 70.1331  35
   0   4 -11 838.700 74.3467  19
   0  -4  11 940.565 73.9817  18
   0   4  11 796.404 68.4512  42
   0   4  11 898.270 71.8551  37
   0   4 -11 745.301 77.1508  25
   0   4  11 733.127 75.5243  18
   0  -4  11 968.416 69.4459  37
   0   4  11 895.272 69.7121  20
   0  -4  11 959.306 73.9709  11
   0  -4  11 954.455 69.3155  20
   0   4  12 206.963 26.4876  35
   0   4  12 204.549 24.3804  42
   0   4  12 147.464 32.9396  11
   0   4  12 206.539 34.6702  18
   0  -4  12 209.525 23.9119  37
   0  -4  12 218.815 23.0734  42
   0   4 -12 181.711 39.4791  25
   0  -4 -12 202.528 44.2281  29
   0   4  12 211.064 28.1763  37
   0  -4  12 124.316 33.2830  11
   0  -4  12 232.149 24.9235  20
   0   4 -12 224.735 34.4398  19
   0  -4 -12 264.210 34.0269  19
   0   4  12 225.735 25.8662  20
   0  -4  12 75.8153 32.9861  18
   0   5   0 1.66237 3.72877   6
   0  -5   0-0.69410 1.98921  44
   0   5   0 2.32557 5.06050   4
   0   5   0-1.08267 2.43740   8
   0  -5   0 4.03120 3.23453   7
   0  -5   1-0.16655 2.18682   2
   0   5  -1 1.21011 2.47560   6
   0   5   1-0.26164 4.45792   4
   0  -5  -1 0.77307 2.37265   7
   0   5  -1 11.4637 2.08356   9
   0   5  -1 0.24774 1.88548   8
   0  -5   1 1.38276 2.52568  44
   0   5  -1-2.02994 6.67067   4
   0   5   1-0.28262 3.46309   8
   0  -5   1 1.76878 3.75303   7
   0   5   1-0.36991 1.26626   3
   0   5  -1 0.31358 2.81043   1
   0  -5  -1 2.03743 2.08432   2
   0   5   2-3.13684 4.57806   4
   0   5   2 1.06927 3.49030   3
   0   5   2 1.82227 5.47642   8
   0  -5  -2 0.30536 2.28113  44
   0  -5  -2 0.66746 2.77505   2
   0   5  -2 2.56705 1.39974   6
   0   5  -2 3.16086 6.47988   4
   0   5  -2 17.5255 5.17259   1
   0  -5  -2 0.80380 3.81749   9
   0   5  -2-0.94788 2.69691   9
   0  -5   2 5.76424 5.60780   7
   0   5   2 5.37791 7.12998   6
   0   5   3 6.83370 5.51345   4
   0  -5   3 1.31701 3.67671  44
   0  -5  -3 1.13737 3.71703   2
   0   5   3-4.03096 7.24007   6
   0  -5   3-0.95617 6.79716   7
   0   5  -3 1.96158 4.45151   4
   0   5   3-0.41426 6.97674   3
   0  -5  -3 1.01872 6.83677   9
   0   5  -3 9.50282 6.88757   1
   0   5  -3 5.20143 4.09971   9
   0   5   3 7.91509 9.17243   8
   0   5  -4-2.05554 4.77531   4
   0  -5  -4 14.9784 9.98492   9
   0  -5   4-0.89506 4.98448  44
   0   5   4 2.66344 9.33873   6
   0  -5  -4 1.78618 6.12863   2
   0   5  -4-2.77727 6.06264   9
   0   5  -4-3.57948 8.22711   1
   0   5   4-1.23685 10.3318   3
   0   5  -5-19.9931 18.8419  34
   0   5  -5 5.95645 12.4900  19
   0   5   5 9.33442 9.99860  35
   0   5   5 5.70662 7.75675  37
   0   5  -5-0.56377 11.6517  41
   0   5  -5-5.01267 11.4733   1
   0   5   5-2.21047 11.0524   6
   0  -5   5 1.31727 5.59621  44
   0   5  -5 10.6609 8.82697   9
   0  -5   5 8.18820 7.37521  20
   0  -5   5 5.24459 10.8931   7
   0  -5  -5 14.7871 8.20241   2
   0   5   5 3.63669 14.7732   8
   0   5   5 7.97617 15.1033   3
   0   5   6 1.94958 11.2524  35
   0   5   6-6.09130 20.5158  18
   0   5   6-6.71423 16.9349   3
   0   5   6 28.9748 20.8251  11
   0   5   6 2.83334 15.5319   8
   0   5  -6 15.5784 23.7951  25
   0   5  -6 7.54835 13.0900  41
   0   5  -6 10.2905 18.9201  34
   0  -5  -6 35.2989 11.2457  19
   0   5  -6-12.4280 15.7039   1
   0  -5   6-5.97242 7.75122  42
   0  -5  -6 2.13885 16.2450  40
   0  -5   6 8.70814 13.1216   7
   0  -5  -6 10.4038 20.6833  29
   0   5   6-6.71169 12.7840  16
   0  -5  -6 2.74795 18.0132  28
   0   5   6-4.12077 10.1012  20
   0   5   6-2.12055 9.89984  37
   0   5  -6 6.98591 10.7550   9
   0   5  -6 1.07033 15.2337  19
   0   5   6 1.33503 11.9492  14
   0  -5   6-1.14791 9.14700  37
   0   5   6-1.75041 14.1603  13
   0   5   6 4.07837 18.1265  36
   0  -5   6 8.80773 9.91864  20
   0  -5   7 0.49542 10.9199  20
   0   5  -7-4.42714 21.4444  34
   0   5   7 5.48428 13.4195  14
   0   5   7 5.01047 15.8062  13
   0   5   7 4.49196 13.1285  35
   0   5   7 1.57516 13.7862  16
   0   5   7-1.38889 12.8072  37
   0  -5  -7-2.52309 19.6983  40
   0  -5   7 10.0899 10.0520  42
   0   5   7 3.64749 10.8669  20
   0   5  -7-2.30659 13.8351   9
   0   5   7 7.25722 22.4798  36
   0   5   7 20.2714 19.7046   3
   0   5  -7 2.01719 18.2214  19
   0  -5  -7 14.4497 20.9668  28
   0  -5   7 3.82114 14.2278   7
   0   5   7 2.78531 16.9831   8
   0  -5  -7 19.6069 14.8135   1
   0   5   7 10.2791 9.65542  42
   0  -5  -7-5.72991 24.2370  29
   0   5  -7-27.3169 26.6114  25
   0  -5   7 15.1899 11.8371  37
   0   5   7 3.45197 23.0677  11
   0  -5  -7-6.69128 12.9642  19
   0   5   7-4.67692 22.7978  18
   0   5  -7 11.3963 15.7596  41
   0   5  -7-5.19845 18.3658   1
   0  -5   8 2.39158 12.5702  20
   0   5   8 3.76059 10.7921  42
   0   5   8 19.3196 25.4670  11
   0   5   8 3.49262 12.1809  20
   0  -5  -8 3.42097 27.5638  29
   0   5   8-0.89188 16.2055  16
   0  -5  -8 2.17772 15.5770  19
   0   5   8 1.10625 18.1551  13
   0   5  -8 17.9720 20.9540   1
   0   5  -8-6.75924 22.9688  34
   0   5   8-10.9516 15.2313  35
   0   5  -8-30.9684 18.1396   9
   0  -5  -8 13.6924 24.1220  28
   0   5   8-14.5563 27.0588  36
   0   5   8-10.1295 17.3536   8
   0  -5   8 11.2516 12.6926  37
   0   5   8 13.1008 25.3955  18
   0  -5   8-2.32787 14.7564   7
   0  -5  -8-12.4456 17.5080   1
   0   5  -8 0.94743 16.8428  41
   0   5  -8 10.4341 19.1287  19
   0  -5  -8 4.88309 20.4820  40
   0  -5   8-1.06128 10.2267  42
   0   5   8-11.4186 21.1533   3
   0   5   8 4.43753 15.8856  14
   0   5  -8 9.56379 28.2986  25
   0   5   9 18.1718 27.6398  18
   0  -5   9-0.68101 13.0874  20
   0   5   9 5.59251 14.7545  20
   0  -5   9-5.43376 13.6533  37
   0   5   9 6.49998 12.8623  42
   0  -5  -9-3.38461 18.0292  19
   0   5  -9 14.9053 19.2820  41
   0   5  -9 11.0582 22.8075  19
   0   5   9 14.9021 15.6215  35
   0   5   9 5.49683 27.2857  11
   0   5   9 1.87335 16.3348  37
   0   5  -9 19.4955 29.8781  25
   0   5  -9-1.08154 26.1435  34
   0  -5  -9-34.5213 33.1241  29
   0  -5   9 4.27635 12.2307  42
   0  -5  -9 4.06329 28.1684  28
   0  -5  -9-30.5426 25.5207  40
   0  -5 -10 14.8860 30.6680  28
   0   5  10 6.23269 14.2492  42
   0   5  10 8.08378 17.5579  37
   0   5  10 1.41810 27.8447  11
   0  -5  10-2.11804 13.2439  37
   0  -5  10-4.56714 13.8084  20
   0   5 -10 20.0630 32.8776  25
   0  -5 -10-17.5009 26.1628  40
   0  -5 -10 18.3155 36.0542  29
   0   5 -10 2.01754 25.1207  19
   0  -5 -10-0.94581 21.8186  19
   0   5  10-1.95536 16.5862  35
   0   5  10 0.85401 16.4107  20
   0  -5  10 5.38404 12.3091  42
   0   5  10-4.32616 29.4873  18
   0   5 -10-9.16684 28.4344  34
   0   5 -11-6.26522 27.6376  19
   0  -5 -11-4.20309 33.1788  28
   0   5 -11 2.62565 35.9124  25
   0  -5  11 9.38034 13.9080  37
   0  -5 -11-14.2695 26.7806  40
   0  -5  11-1.39125 13.0708  42
   0   5  11 0.79164 15.6111  42
   0   5  11 10.6275 18.0122  35
   0  -5 -11-7.91799 25.1395  19
   0   5 -11 7.12187 28.2084  34
   0   5  11 31.4880 29.9279  11
   0   5  11 12.0289 16.7530  20
   0   5  11-18.0988 29.7348  18
   0  -5  11-8.82588 14.6523  20
   0   5  11 29.8154 20.3725  37
   0  -5 -11 11.2917 38.4139  29
   0   5  12-2.42653 16.7970  20
   0   5 -12 17.7541 28.2072  19
   0   5  12-8.78486 19.3555  37
   0  -5 -12-36.8363 30.8662  40
   0   5  12-14.7155 27.9705  11
   0   5  12-13.7088 27.1510  18
   0   5 -12-6.18266 33.8993  25
   0  -5 -12-2.77805 25.1105  19
   0  -5  12-8.63630 13.1017  42
   0  -5  12 3.11490 14.6323  20
   0   5  12-3.77549 16.0904  42
   0   6   0 1623.91 71.3397   6
   0  -6   0 1490.09 67.1604   7
   0   6  -1 10689.6 795.497   9
   0   6  -1 12340.0 797.251   4
   0  -6  -1 11209.1 796.110  44
   0   6   1 9890.04 796.942   8
   0  -6   1 12599.0 797.620   7
   0  -6  -1 9995.68 796.168   2
   0   6   1 12246.1 797.446   4
   0  -6   1 10869.9 796.155   2
   0  -6   1 11890.8 796.587  44
   0   6  -1 14360.9 796.325   6
   0   6   2 34805.4 3027.87   8
   0  -6   2 41544.9 3027.84   7
   0  -6  -2 47441.4 3026.20  44
   0   6  -2 39189.6 3026.66   4
   0   6  -2 41621.2 3026.07   9
   0   6  -2 47822.2 3025.36   6
   0  -6   2 36566.9 3025.97   2
   0   6   2 50915.4 3026.18   3
   0   6  -2 44563.5 3026.51   1
   0   6   2 42116.9 3028.94   6
   0  -6  -2 41942.7 3026.56   2
   0  -6   3 6900.69 485.398   7
   0   6  -3 6977.63 483.585   9
   0   6  -3 5927.61 482.781   4
   0  -6   3 6909.95 483.658  44
   0   6   3 7109.67 487.375   8
   0  -6  -3 7990.64 484.115   2
   0   6  -3 7156.59 483.840   1
   0   6   3 7623.74 484.588   3
   0   6   3 6711.65 486.239   6
   0   6   3 6881.17 484.744   4
   0   6   4 529.272 43.0116   6
   0   6   4 425.016 41.7718   3
   0  -6   4 549.007 42.2133   7
   0  -6  -4 506.654 39.8150   1
   0   6  -4 488.173 39.7933   9
   0   6  -4 501.913 40.6868   1
   0  -6   4 533.386 39.4862  44
   0  -6  -4 632.282 40.5070   2
   0   6   4 572.127 46.1620   8
   0   6   5 5905.04 338.082   8
   0   6   5 4936.31 331.848  16
   0  -6  -5 6029.50 333.417  28
   0   6  -5 4372.98 330.396   9
   0  -6   5 5077.48 332.650   7
   0  -6   5 4787.23 329.534  44
   0   6   5 3629.49 329.398  37
   0   6   5 4589.74 332.706  13
   0   6  -5 4199.60 330.356   1
   0  -6   5 5235.15 329.413  20
   0   6   5 4734.73 333.444  36
   0   6   5 4992.39 331.678  35
   0  -6  -5 5771.95 331.082   2
   0   6  -5 4663.26 330.111  19
   0  -6   5 4519.54 329.004  21
   0  -6   5 4492.64 328.576  42
   0   6   5 4959.41 332.346   6
   0   6   5 3646.88 332.114   3
   0  -6  -5 4922.58 330.863   1
   0   6  -5 4311.75 331.177  41
   0   6   5 4328.92 330.012  20
   0   6  -5 3966.29 331.177  33
   0  -6  -5 5574.51 332.806  40
   0   6   5 4839.83 331.742  14
   0  -6   5 4542.89 329.016  26
   0  -6  -5 6347.13 334.708  29
   0   6   6 7904.60 733.327   3
   0   6  -6 9043.46 731.226   1
   0   6   6 9115.75 734.833  18
   0   6  -6 10879.3 734.589  34
   0  -6  -6 11287.9 732.285   1
   0   6   6 10554.2 732.784  16
   0  -6  -6 12746.8 734.497  40
   0   6  -6 9346.40 731.393   9
   0  -6   6 12621.6 730.360  37
   0   6  -6 9831.68 731.034  19
   0  -6  -6 14857.2 736.958  29
   0   6   6 12605.9 737.313  36
   0  -6  -6 10971.1 731.201  19
   0  -6   6 10680.3 730.227  20
   0   6   6 8823.92 734.414  11
   0   6   6 11202.2 734.703  13
   0   6   6 14370.8 739.273   8
   0   6  -6 8615.82 731.857  41
   0   6   6 11128.6 732.830  35
   0   6   6 10791.4 732.874  14
   0   6  -6 13666.9 737.463  25
   0  -6   6 11696.0 733.523   7
   0   6   6 11080.8 732.576   6
   0   6   6 10045.7 731.157  20
   0   6   6 8706.54 730.712  37
   0  -6   6 9833.39 729.450  42
   0   6  -6 8281.46 731.362  33
   0  -6  -7 2418.06 143.131  28
   0   6   7 1950.89 138.216  20
   0   6   7 1644.20 137.933  37
   0  -6   7 1925.48 137.032  20
   0   6  -7 1691.01 138.467  19
   0   6  -7 1610.82 138.667   1
   0  -6   7 1605.64 135.820  42
   0   6   7 2736.20 145.795   8
   0  -6   7 2011.88 139.590   7
   0   6   7 1482.68 141.104   3
   0   6  -7 1672.79 138.476   9
   0   6   7 1630.15 143.376  18
   0   6   7 1898.50 139.952  14
   0   6  -7 1407.17 138.537  41
   0   6   7 1729.42 137.116  42
   0  -6  -7 2473.20 145.142  29
   0   6   7 2277.35 140.683  35
   0  -6  -7 2206.97 139.892   1
   0  -6   7 2054.12 136.930  37
   0   6  -7 1817.31 142.000  34
   0   6  -7 2390.32 145.289  25
   0   6   7 1958.85 140.181  16
   0  -6  -7 2314.17 142.361  40
   0   6   7 2389.62 147.180  36
   0   6   7 2146.20 142.668  13
   0   6   7 1701.59 143.397  11
   0  -6  -7 2178.49 138.742  19
   0  -6  -8 1004.20 73.0965  40
   0  -6  -8 1047.93 77.1028  29
   0   6   8 894.943 72.0626  13
   0   6  -8 781.368 72.4108  34
   0   6   8 701.892 74.7687  11
   0   6   8 742.099 67.9615  37
   0   6   8 765.475 66.6027  42
   0  -6  -8 984.912 68.9276  19
   0   6   8 678.719 72.0778   3
   0   6  -8 987.619 76.9736  25
   0  -6   8 929.359 66.3434  42
   0   6   8 1099.27 78.6461  36
   0  -6  -8 944.804 69.5030   1
   0   6   8 876.543 69.4401  35
   0   6   8 832.298 67.6994  20
   0   6   8 794.788 75.9167  18
   0   6   8 1265.71 75.0515   8
   0   6  -8 755.725 69.6085  19
   0   6  -8 722.402 68.4155   9
   0  -6   8 990.598 67.1785  37
   0  -6   8 925.891 67.2713  20
   0   6   8 789.259 69.4517  14
   0  -6   8 979.731 69.6321   7
   0   6   8 802.597 69.7604  16
   0   6  -8 764.807 70.5614  41
   0  -6  -8 1091.32 74.6316  28
   0   6  -9 1223.17 109.433  19
   0  -6  -9 1744.10 117.309  29
   0   6   9 1211.24 114.522  11
   0   6   9 1549.15 112.813  13
   0  -6  -9 1551.60 110.083  19
   0  -6   9 1574.71 106.789  42
   0   6   9 1217.28 108.634  20
   0  -6   9 1491.54 107.404  20
   0   6   9 1230.16 114.694  18
   0   6  -9 1149.02 109.868  41
   0  -6   9 1727.62 107.758  37
   0   6   9 1331.35 106.911  42
   0  -6  -9 1761.53 114.927  28
   0   6  -9 1261.01 111.972  34
   0   6  -9 1378.76 114.625  25
   0   6   9 1613.79 110.208  35
   0  -6  -9 1720.75 113.692  40
   0  -6 -10 2164.49 138.477  40
   0   6  10 653.331 138.883  11
   0  -6  10 2068.53 132.689  20
   0   6  10 1955.41 134.664  35
   0   6  10 1829.80 132.939  20
   0  -6 -10 2063.90 143.086  29
   0   6 -10 1548.52 135.122  41
   0  -6  10 1974.86 131.517  42
   0  -6  10 2219.88 132.569  37
   0  -6 -10 2137.24 139.165  28
   0   6 -10 1544.08 134.417  19
   0   6 -10 1668.94 138.338  25
   0   6 -10 1561.91 136.284  34
   0   6  10 1780.05 134.837  37
   0  -6 -10 2170.56 135.465  19
   0   6  10 1003.55 139.026  18
   0   6  10 1687.83 131.598  42
   0   6 -11 483.993 53.2861  19
   0  -6 -11 655.450 52.1186  19
   0  -6 -11 614.356 63.1853  29
   0   6  11 541.172 56.4336  11
   0  -6 -11 585.803 55.2258  40
   0  -6  11 596.918 46.3603  42
   0  -6  11 630.176 47.9394  20
   0   6  11 608.802 48.8907  20
   0   6 -11 485.860 58.0352  25
   0   6  11 534.226 49.5815  35
   0  -6 -11 437.640 58.2536  28
   0   6  11 535.513 47.5586  42
   0   6  11 581.837 50.8895  37
   0   6 -11 503.424 55.3861  34
   0   6  11 495.508 56.7253  18
   0  -6 -12 599.986 67.5099  29
   0   6  12 709.714 56.5642  35
   0   6  12 623.361 53.9546  42
   0   6  12 756.287 58.2741  37
   0   6  12 656.917 55.2124  20
   0  -6  12 742.314 54.9565  20
   0   6 -12 562.258 62.0335  34
   0   6  12 704.971 62.1145  18
   0  -6 -12 687.192 61.5770  40
   0   6  12 604.454 61.1900  11
   0   6 -12 606.694 59.1309  19
   0   6 -12 438.145 63.0278  25
   0  -6 -12 776.419 59.4382  19
   0  -6  12 718.694 53.4515  42
   0  -7   0-0.25691 3.29096  44
   0  -7   0 0.87191 4.76084   7
   0   7   0 3.80966 3.71578   8
   0   7   0 0.96650 1.74159   9
   0   7   0 1.15781 7.81996   4
   0   7   0 2.00293 5.63156   6
   0  -7   1 0.85423 3.14169  44
   0   7  -1 4.77882 3.78877   6
   0  -7   1 0.97220 3.39944   2
   0   7  -1 1.15867 9.11671   4
   0   7   1 1.83556 5.00367   8
   0  -7  -1 1.87012 3.44639  44
   0   7   1 2.47973 8.22132   6
   0   7   1 3.66829 7.12081   4
   0  -7  -1 0.26808 3.33036   2
   0  -7   1 4.19794 6.30153   7
   0   7  -1-0.54243 2.58433   9
   0   7   2-0.39892 3.07844   3
   0  -7  -2 2.21273 3.49089  44
   0   7  -2 9.21258 5.33399   1
   0   7  -2-3.53076 11.6719   4
   0  -7  -2 6.38351 4.19177   2
   0  -7   2-1.49488 3.73689   2
   0   7   2-3.12674 6.93639   4
   0   7  -2 0.24690 2.64464   6
   0   7   2 5.03607 7.07082   8
   0   7   2-9.75147 10.2078   6
   0  -7   2 5.67030 6.92981   7
   0   7  -2 1.06980 3.73901   9
   0  -7  -2 3.10209 3.38768   1
   0   7   3-7.36353 10.8858   8
   0   7  -3-0.61045 4.99932   9
   0   7   3 5.49935 8.36866   4
   0  -7  -3 4.29540 4.43669   1
   0  -7   3 1.04908 5.63406  44
   0  -7   3-2.65243 4.41428   2
   0  -7   3 1.68939 8.23702   7
   0   7   3 0.31703 6.50810   3
   0   7  -3-7.61253 13.7975   4
   0   7   3 11.2308 11.9103   6
   0  -7  -3 1.75552 4.92285   2
   0   7  -3 0.65951 6.87306   1
   0   7   4 4.72056 13.7702   6
   0   7   4-4.95807 7.09081  37
   0   7  -4-2.86566 6.86913   9
   0  -7  -4 7.57780 6.96772   2
   0  -7   4-0.77275 6.17619  44
   0  -7  -4 7.92600 5.62194   1
   0   7   4 13.5809 11.4520   3
   0   7   4 8.63345 15.9856   8
   0   7  -4 3.31626 10.1334   1
   0  -7   4 7.70805 9.77181   7
   0  -7  -5-4.12426 8.44356   1
   0  -7   5 2.98822 7.89786  21
   0  -7   5-2.32997 8.50375  26
   0  -7   5 3.77758 7.47452  44
   0   7   5-4.95329 13.5211  13
   0  -7   5 0.28060 5.84851  42
   0  -7  -5-7.25906 9.47968  12
   0   7   5 1.91518 9.41447  20
   0   7   5-6.74123 12.6454  14
   0   7  -5-3.87062 24.9673  34
   0   7  -5-1.04466 8.58947   9
   0   7   5 7.45295 12.7682  16
   0  -7  -5 7.18565 19.1503  28
   0  -7  -5-2.47647 8.66779   2
   0  -7   5-3.03267 7.98452  20
   0   7   5 20.6602 16.3178   3
   0   7   5 2.94138 8.66996  37
   0   7   5-9.58354 16.0630  36
   0   7  -5 16.8648 16.8285  33
   0   7  -5-3.62914 11.6632   1
   0  -7  -5-22.0683 21.7908  29
   0   7  -5-0.67203 13.5259  41
   0   7   5-3.94384 13.7054   6
   0  -7  -5 6.01590 17.0202  40
   0  -7   5 3.82629 7.39984  37
   0   7  -5 3.96367 12.1256  19
   0  -7   6-4.13756 10.2038  21
   0  -7   6 2.17064 8.05084  42
   0   7   6-23.2371 25.4738  11
   0   7  -6-2.12842 31.5833  25
   0  -7   6 7.12797 9.52326  20
   0  -7   6 2.21991 7.89285  44
   0  -7   6 5.38878 9.89802  26
   0   7   6 9.08327 20.2390   8
   0   7   6-2.93581 13.4452  35
   0   7  -6-0.64479 10.7513   9
   0   7  -6 2.02382 26.1730  34
   0  -7  -6 3.67407 10.4786  19
   0   7  -6-10.7552 17.0585  33
   0   7  -6-0.79251 14.9347  41
   0  -7  -6 16.6717 21.4553  28
   0  -7  -6 9.98358 10.6651   1
   0  -7   6 2.31925 12.0309   7
   0  -7  -6-0.88820 23.5076  29
   0   7   6-3.08265 10.9603  37
   0   7   6-0.78211 13.2933  14
   0   7   6-3.93218 13.4169  16
   0   7  -6-1.66496 14.7228  19
   0   7   6 24.9928 20.2448   3
   0   7   6-8.70100 15.6731  13
   0   7   6-6.94383 12.3731  20
   0   7   6-2.34001 14.8779   6
   0  -7  -6 3.18876 19.3590  40
   0   7   6-14.6306 24.1218  18
   0   7  -6 3.80544 14.5411   1
   0   7   6-6.76570 20.8563  36
   0  -7   6-3.28101 9.00649  37
   0   7   7 11.6889 15.6812  16
   0   7   7 9.43559 13.0669  20
   0   7  -7 6.12926 17.7729  19
   0   7  -7 2.26212 17.9895   1
   0  -7   7 4.65597 10.9816  37
   0   7  -7-10.0993 17.1974  41
   0   7   7 28.6211 15.9837  14
   0   7   7 14.5390 28.4970  18
   0   7   7-21.7491 24.6188  36
   0  -7   7-1.02190 10.8106  20
   0  -7  -7-6.45628 28.3920  29
   0   7  -7 10.9170 31.2614  25
   0   7   7-5.47869 17.5809  13
   0  -7   7 0.81161 14.4796   7
   0  -7  -7-0.63324 12.3833  19
   0   7  -7-3.85791 13.4330   9
   0   7   7 14.1957 15.5200  35
   0   7   7-3.75480 13.1441  37
   0   7   7 0.58827 12.2786  42
   0   7   7 3.89860 28.5695  11
   0   7   7 1.18586 22.0737   3
   0  -7  -7 27.2620 13.5215   1
   0   7  -7 13.6363 26.0534  34
   0  -7  -7 8.31735 21.9418  40
   0  -7   7-4.48674 9.45910  42
   0   7   7 11.6515 21.0756   8
   0  -7  -8 7.40992 23.3233  40
   0   7   8-0.92391 16.1974  35
   0   7  -8-3.52104 32.5452  25
   0   7   8-21.2855 24.8947   3
   0   7   8 15.8023 16.6281  16
   0  -7  -8-1.07590 28.9571  28
   0   7   8 2.84124 30.2320  11
   0  -7   8 2.79728 12.6262  37
   0   7   8-13.6626 15.9383  20
   0  -7  -8-7.43936 14.5248  19
   0   7  -8-11.5498 19.9075  41
   0   7   8 0.98254 16.1897  14
   0   7   8-17.9791 18.6948  13
   0   7   8 7.04370 15.0490  37
   0  -7   8-2.47213 14.9976   7
   0   7  -8 7.97096 26.1877  34
   0   7   8-10.6622 27.6762  36
   0   7   8 10.1144 30.2283  18
   0  -7   8 9.08326 12.5738  20
   0  -7   8-2.67464 11.0513  42
   0   7   8 11.6693 13.0929  42
   0   7  -8 4.84785 20.4003  19
   0  -7  -8 2.46314 31.9577  29
   0  -7  -9-93.7282 49.7690  29
   0  -7   9-18.0605 17.9598  20
   0   7   9 47.4193 27.5510  16
   0  -7  -9 43.9795 35.3924  40
   0  -7   9-13.2737 17.6343  37
   0   7  -9-4.59650 27.9214  19
   0   7   9 64.9436 31.0764  13
   0   7  -9-75.3743 42.1167  25
   0   7   9 86.1107 25.1342  42
   0   7  -9-3.49404 26.3921  41
   0   7  -9-22.7616 36.1764  34
   0  -7   9-3.65695 16.4289  42
   0   7   9 70.3187 28.0539  35
   0   7   9-1.04870 25.4121  14
   0   7   9 6.02622 44.1409  18
   0   7   9 47.4131 44.5076  11
   0   7 -10 2.53926 29.8226  34
   0  -7  10 3.80289 14.0922  20
   0   7  10-9.27410 17.9389  35
   0  -7  10 1.98333 12.9469  42
   0  -7 -10 3.61211 20.3383  19
   0   7 -10 11.0598 22.3668  41
   0  -7  10 16.0838 13.1797  37
   0   7 -10-7.93379 25.7974  19
   0  -7 -10-4.39695 39.7131  29
   0  -7 -10-2.41731 28.2223  40
   0   7  10 17.4103 31.5358  11
   0   7 -10-5.11996 35.6940  25
   0  -7 -10 27.8929 34.2643  28
   0   7  10 4.76165 14.7040  42
   0   7  10 13.2775 31.6959  18
   0   7  10-6.83287 16.2690  20
   0  -7  11-5.98775 13.1404  42
   0   7  11-21.3797 30.4147  11
   0  -7 -11-9.20791 35.1973  28
   0  -7  11-2.28343 14.1483  20
   0   7  11 6.64107 16.8668  20
   0   7  11-5.46958 15.7716  42
   0   7  11-28.5148 31.7377  18
   0   7 -11-18.6899 34.0602  25
   0  -7 -11-11.9515 22.1003  19
   0   7 -11-16.7482 24.8734  41
   0   7 -11-30.0197 31.0405  34
   0   7  11 30.7858 18.7458  35
   0  -7 -11-32.5017 29.7673  40
   0   7 -11-1.99985 26.0738  19
   0  -7 -11-19.2050 39.5527  29
   0   7  11 12.8925 20.3416  37
   0  -7 -12-0.85196 24.8450  19
   0   7 -12-10.5194 32.8249  34
   0   7  12-15.1505 19.2936  35
   0  -7  12 0.71913 14.6765  20
   0   7  12 23.6274 28.7081  11
   0   7 -12-3.68740 26.0128  19
   0  -7  12-5.51782 14.1824  42
   0   7 -12-4.66945 35.3683  25
   0   7  12 11.4333 28.0539  18
   0   7  12-3.54981 15.7080  42
   0   7  12-10.5502 19.2466  37
   0  -7 -12-12.9374 29.5724  40
   0   8   0 572.329 38.4711   6
   0   8   0 486.921 35.1331   9
   0   8   0 530.022 39.6880   4
   0   8   0 447.821 36.7804   8
   0  -8   0 449.915 36.6078   2
   0  -8   0 546.531 37.0724  44
   0  -8  -1 737.386 53.9032  44
   0  -8   1 766.057 55.5084   7
   0   8  -1 766.808 57.2884   4
   0  -8   1 685.779 53.8410   2
   0  -8   1 817.685 54.6286  44
   0   8   1 802.086 56.6011   4
   0   8  -1 727.370 52.9056   9
   0  -8  -1 669.061 53.9295   2
   0   8   1 618.264 54.7268   8
   0   8  -1 880.664 54.1151   6
   0   8   1 798.659 57.2444   6
   0   8  -2 1767.17 119.383   1
   0  -8  -2 1405.28 119.151   2
   0  -8   2 1537.39 118.958   2
   0   8  -2 1660.63 118.607   9
   0  -8  -2 1956.81 119.239  44
   0   8   2 1773.61 121.655   4
   0   8  -2 1785.57 118.103   6
   0  -8   2 1761.72 121.346   7
   0  -8   2 1724.46 119.805  44
   0   8   2 1347.27 120.998   8
   0   8  -2 1664.80 121.739   4
   0   8   3 2222.77 166.051   6
   0  -8   3 2401.35 163.683   7
   0  -8   3 2321.54 161.660  44
   0  -8   3 2177.08 160.695   2
   0   8   3 1899.02 164.888   8
   0  -8  -3 2363.08 161.245   1
   0   8  -3 2309.89 161.403   1
   0   8  -3 2225.75 160.883   9
   0  -8  -3 2464.98 161.836   2
   0   8   4 511.028 41.6140   6
   0   8  -4 509.053 35.3592  19
   0  -8   4 480.063 37.8884   7
   0   8  -4 449.234 51.2870  34
   0  -8  -4 546.690 42.1644  28
   0   8   4 494.535 39.0943  13
   0  -8   4 426.607 33.8678   2
   0   8   4 329.795 34.2589  37
   0   8  -4 377.797 37.6596  41
   0  -8  -4 485.210 35.0467   1
   0   8   4 471.282 38.2409  16
   0   8   4 343.192 33.7529  42
   0  -8   4 438.103 33.2683  42
   0  -8   4 495.553 34.6448  21
   0  -8  -4 501.684 35.9622   2
   0  -8   4 444.971 34.9664  44
   0   8   4 512.189 44.3355   8
   0   8  -4 426.193 40.9794  33
   0   8  -4 420.058 35.2716   1
   0  -8   4 479.864 34.5904  26
   0  -8   4 478.938 36.7164  17
   0   8   4 447.022 38.0421  14
   0   8  -4 441.524 34.9324   9
   0  -8  -4 542.838 35.6660  12
   0   8   4 354.798 35.6577  35
   0   8   5 42.4326 17.1984   6
   0  -8   5 38.0311 14.7821   7
   0   8  -5 29.7398 12.2783   1
   0   8   5 38.5209 15.0987  14
   0   8  -5 22.9973 10.4245   9
   0   8   5 14.1191 16.8290  36
   0  -8   5 42.2970 9.66546  26
   0   8   5 27.5345 14.9070  13
   0  -8  -5 51.8559 22.3334  28
   0  -8  -5 36.2374 10.6267  12
   0  -8  -5 62.7762 10.6679   1
   0   8   5 29.9064 10.7039  37
   0  -8   5 41.2464 7.78614  42
   0  -8  -5 55.4737 10.9207   2
   0   8  -5 38.1496 12.9168  19
   0  -8   5 37.3324 12.5179  17
   0  -8  -5 76.3797 20.1609  40
   0  -8   5 47.4998 10.0848  44
   0   8   5 30.0705 12.2787  24
   0  -8   5 48.6262 10.1003  21
   0  -8   5 60.4401 8.98983  37
   0   8  -5 39.0128 31.4015  34
   0   8  -5 32.9861 19.8532  33
   0  -8   5 37.9967 9.72502  20
   0   8   5 26.5715 14.3247  16
   0   8   5 26.1099 13.3792  27
   0   8  -6 785.800 67.3664   9
   0   8   6 840.236 69.8135  16
   0   8  -6 732.573 69.7240  33
   0   8  -6 899.638 76.3347  34
   0   8   6 825.743 69.1147  35
   0   8   6 779.476 66.9529  20
   0  -8   6 825.342 65.0245  42
   0  -8   6 1016.35 65.6496  37
   0  -8  -6 1162.92 75.7986  29
   0   8  -6 783.686 67.7355   1
   0  -8   6 1018.95 66.7579  44
   0   8   6 702.417 66.6519  37
   0   8  -6 853.304 67.5052  19
   0  -8  -6 1201.10 75.4349  28
   0   8   6 1259.19 81.7476   8
   0   8   6 932.234 74.4123  36
   0  -8  -6 1091.15 72.5800  40
   0   8   6 951.985 71.6591  13
   0   8   6 955.225 71.2938   6
   0   8   6 901.720 70.2044  14
   0  -8   6 958.441 66.2474  20
   0   8  -6 805.638 69.7725  41
   0  -8  -6 1013.90 68.1677   1
   0  -8   6 754.329 65.4771  21
   0  -8   6 796.572 65.6235  26
   0  -8   6 1017.96 68.5856  17
   0  -8   6 1051.38 70.4294   7
   0  -8  -7 1884.85 117.684  28
   0   8  -7 1374.48 110.831   9
   0  -8   7 1742.84 109.152  37
   0   8   7 1470.22 114.328  13
   0   8  -7 1796.76 120.526  25
   0   8  -7 1250.38 112.205  41
   0   8   7 1360.80 112.584  16
   0   8  -7 1148.97 111.597  33
   0   8   7 1664.40 113.060  35
   0   8   7 1302.85 110.041  20
   0   8  -7 1423.02 110.555  19
   0   8   7 2169.96 123.538   8
   0   8   7 1287.63 110.265  37
   0  -8   7 1688.11 112.548   7
   0   8  -7 1231.93 110.425   1
   0  -8  -7 1699.88 111.600   1
   0   8   7 1334.30 112.502  14
   0   8   7 1784.75 120.457  36
   0  -8   7 1322.45 107.901  42
   0  -8   7 1592.11 109.199  20
   0  -8  -7 1890.54 116.147  40
   0  -8  -7 1907.16 119.070  29
   0  -8  -7 1602.23 110.484  19
   0   8  -8 226.966 38.6377  34
   0   8   8 301.266 42.4684  36
   0   8   8 289.947 32.4967  16
   0  -8   8 217.140 24.2369  42
   0   8   8 204.486 25.7344  42
   0   8  -8 206.889 31.0557  41
   0   8   8 229.224 27.5337  20
   0  -8  -8 292.581 27.6199  19
   0  -8  -8 315.930 43.5770  29
   0   8   8 182.685 26.4969  37
   0   8   8 294.717 32.4168  14
   0   8   8 299.067 33.9593  13
   0  -8   8 319.756 26.4121  37
   0  -8  -8 361.957 41.8498  40
   0  -8   8 282.326 26.2859  20
   0   8   8 276.642 30.7592  35
   0  -8  -8 419.561 47.9860  28
   0   8  -8 245.385 30.0822  19
   0   8  -8 318.340 44.5883  25
   0   8   9 8.84656 19.2927  16
   0   8  -9 35.6968 22.2003  23
   0   8   9 1.02851 18.0091  37
   0   8  -9 7.28762 21.5264  41
   0  -8   9 8.59059 12.6587  42
   0   8  -9 24.3259 35.4507  25
   0  -8  -9-1.17638 26.4711  40
   0   8   9 6.59205 16.7502  20
   0  -8  -9 21.3794 37.8734  29
   0  -8  -9 33.3139 34.1705  28
   0  -8   9 6.31002 13.6041  20
   0  -8   9 10.5611 13.7924  37
   0  -8  -9 13.2431 17.6243  19
   0   8   9 15.4072 19.4723  14
   0   8   9 4.85626 31.0657  36
   0   8   9 15.4456 20.8320  13
   0   8  -9 2.51999 28.3822  34
   0   8   9 0.75901 13.8044  42
   0   8  -9-10.9778 23.2234  19
   0   8   9 10.3183 17.8419  35
   0   8  10 513.569 45.3463  35
   0   8 -10 392.476 47.2649  41
   0   8  10 509.499 48.6415  13
   0  -8 -10 607.111 53.4826  40
   0   8 -10 418.368 46.2380  19
   0  -8  10 513.495 40.9953  42
   0  -8 -10 514.188 59.6474  29
   0  -8  10 474.481 41.5944  20
   0   8  10 425.596 41.6891  42
   0   8  10 445.349 42.7589  20
   0   8 -10 333.303 50.9251  34
   0  -8 -10 605.446 45.8833  19
   0  -8 -10 597.724 56.6547  28
   0   8 -10 509.696 56.2752  25
   0   8 -11 466.672 54.4850  25
   0  -8 -11 569.229 47.4973  19
   0  -8  11 564.372 43.0387  20
   0   8  11 447.849 42.2198  42
   0   8  11 535.724 45.8512  35
   0   8 -11 356.085 50.7715  34
   0  -8 -11 524.694 51.9072  40
   0  -8 -11 444.752 55.7482  28
   0  -8 -11 497.991 59.7530  29
   0   8 -11 411.941 48.2010  41
   0  -8  11 533.776 41.6867  42
   0   8 -11 449.095 48.2961  19
   0   8 -12 94.8906 34.3342  34
   0  -8 -12 125.996 38.6313  28
   0  -8 -12 150.324 41.4245  29
   0  -8  12 173.844 20.9773  20
   0   8 -12 94.2788 28.7350  19
   0   8  12 149.199 23.7221  35
   0  -8 -12 179.637 28.2763  19
   0  -8 -12 104.501 32.0794  40
   0   8  12 161.398 25.7414  37
   0   8 -12 107.621 36.7220  25
   0  -8  12 146.607 18.5295  42
   0   9   0-8.61445 13.8869   4
   0   9   0-2.99918 7.93721   6
   0  -9   0-0.70426 5.05822  44
   0  -9   0 3.83013 5.00171   2
   0  -9   1 2.29338 5.60643  44
   0   9   1-4.37047 12.5331   4
   0   9   1 12.1750 11.6630   6
   0   9   1 7.84641 7.03749   8
   0   9  -1-4.46330 5.77906   6
   0  -9   1 5.98559 8.03000   7
   0   9  -1 11.0700 15.4622   4
   0  -9  -1 5.90309 5.32905   2
   0  -9  -1 0.32361 4.77096  44
   0  -9   1-0.66822 4.75028   2
   0  -9  -2 16.3198 5.31672  44
   0  -9   2 2.79352 9.62521   7
   0   9   2-2.02269 10.0404   8
   0   9   2 15.5706 11.9655   4
   0   9   2 3.51737 15.8753   6
   0  -9   2 6.71374 5.43969   2
   0  -9  -2 0.40222 5.03963   2
   0  -9   2-4.16978 5.75687  44
   0   9  -2 5.05049 5.01665   9
   0   9  -3-5.02097 8.42707  19
   0   9   3-6.04302 10.4814  36
   0  -9  -3 4.57274 19.3989  28
   0   9   3 4.77745 15.1667   8
   0   9   3 9.92911 12.2433  24
   0   9   3-0.69636 13.2229  14
   0  -9   3 2.46924 9.32262  21
   0   9  -3 5.18467 6.75817   9
   0  -9   3 3.64185 7.27266  44
   0   9  -3-6.16899 8.56145   1
   0  -9   3 14.9295 10.8266  17
   0   9   3-0.91136 9.48578  35
   0  -9  -3-4.48183 6.86452   2
   0  -9  -3 0.40068 7.07405  12
   0   9   3 4.78294 11.2136   4
   0   9  -3-26.5065 35.4378  15
   0  -9   3 2.60705 10.8888   7
   0   9   3-0.84711 15.5683  38
   0   9  -3 8.78953 11.4485  31
   0   9   3 4.64464 6.82154  37
   0   9   3-8.39799 13.6637  16
   0  -9  -3-0.74402 5.30162   1
   0  -9   3-4.15683 6.10511   2
   0  -9  -3-0.53101 14.9618  39
   0   9   3-4.25419 18.3130   6
   0  -9   3 9.91715 9.34939  26
   0  -9   4 900.823 26.3750  21
   0   9   4 2.35371 15.2189  27
   0   9   4-10.4112 26.6685  22
   0   9   4-5.77901 17.7036  13
   0  -9   4 1248.95 40.2746  17
   0  -9   4 958.389 27.6357  44
   0   9  -4 1413.13 42.8780  31
   0  -9  -4 2.52966 12.4951   2
   0   9   4-1.75823 14.9594  35
   0   9  -4 492.264 22.3585   1
   0   9   4 1.30589 21.2287   8
   0   9  -4 328.190 19.5330  19
   0  -9  -4 8.05659 11.6880   1
   0  -9   4 458.118 18.3716  42
   0   9  -4 1391.72 66.7635  15
   0   9   4 12.1728 12.7862  37
   0  -9   4 1671.13 42.0643   7
   0  -9   4 337.899 16.1169  37
   0  -9   4 878.841 25.9832  26
   0   9  -4 2475.75 84.7843  34
   0   9  -4 1645.90 45.0991  41
   0   9  -4 1743.98 56.5226  33
   0  -9  -4-4.27597 19.7284  39
   0   9  -4 1248.71 30.9350   9
   0  -9  -4 1.40768 12.4002  12
   0   9   4-1.13668 22.3223   6
   0  -9  -4-6.96489 24.1871  28
   0   9   4 4.22129 22.6600  38
   0   9   4-1.34115 15.3275  24
   0  -9   4 823.053 23.0592   2
   0  -9  -5 4.35688 10.0429  12
   0   9  -5-2.92886 19.6505  33
   0   9   5 9.67605 14.3343  27
   0   9  -5-0.82246 16.2635  41
   0  -9   5 4.58451 7.64454  37
   0  -9  -5 6.32909 9.57694   2
   0  -9   5 1.94601 8.94363  26
   0  -9   5 2.82370 6.51749  42
   0   9   5 18.4028 10.7805  37
   0   9   5 0.85475 15.5577  14
   0   9  -5-6.61096 10.4628   9
   0   9  -5-4.36548 11.2895   1
   0   9  -5 3.77825 11.8445  19
   0   9   5-2.12208 12.7906  35
   0   9   5 17.9912 18.6399   6
   0   9  -5 21.4842 40.9340  15
   0   9  -5 22.3306 35.2480  34
   0  -9   5 1.16464 9.07553  21
   0  -9  -5-8.04786 24.4437  28
   0   9   5 16.3248 16.0934  16
   0  -9   5 2.60138 13.3686  17
   0  -9   5-4.03685 14.0803   7
   0  -9  -5 4.32365 7.70437   1
   0  -9   5 0.53101 9.37682  44
   0   9   5-3.44747 12.2589  24
   0   9   5-3.52983 22.5104  38
   0   9   5 11.0752 19.0904  36
   0   9   5 7.67171 14.7904  13
   0   9   5-26.1368 26.2083   8
   0  -9  -6 1.77026 22.1188  40
   0   9   6 25.5959 22.4761  36
   0   9  -6-5.99993 20.5009  33
   0  -9   6 14.4024 14.6301  17
   0   9  -6 9.84154 15.8246  19
   0  -9  -6-15.2269 28.4256  28
   0   9  -6-14.5474 36.9697  15
   0  -9  -6-2.47155 12.3190  12
   0   9  -6-10.3897 16.2694   1
   0   9   6-5.45458 12.5710  37
   0  -9   6 3.47943 8.04795  42
   0  -9   6 1.80767 10.2536  26
   0  -9   6-3.66562 8.81117  37
   0  -9   6 8.90822 9.93192  44
   0   9   6-26.2557 29.2997   8
   0   9   6-4.36759 16.4898  13
   0   9  -6-10.1472 32.3782  34
   0   9   6-6.69353 16.1913  16
   0  -9  -6-4.48939 10.6939   1
   0  -9   6 0.89799 9.78157  20
   0   9   6-1.90180 15.8555  14
   0  -9   6-4.05771 10.6420  21
   0   9  -6-5.32774 12.4733   9
   0   9   6-5.36120 20.5130   6
   0  -9  -6-5.10373 12.2412   2
   0   9   7 1.20905 17.2309  13
   0  -9  -7-2.02282 25.4502  40
   0   9   7-8.26969 17.7674  14
   0  -9   7 0.46919 10.1169  42
   0  -9  -7 1.48947 15.0302   1
   0   9   7 10.1978 30.0071   8
   0  -9   7 0.45413 11.2306  37
   0   9  -7-27.2109 33.5150  34
   0   9   7-9.35448 17.6336  16
   0  -9  -7-13.6436 13.9426  19
   0  -9  -7-16.1888 32.7593  29
   0  -9  -7 1.13316 29.4518  28
   0   9  -7 1.04736 19.1562  41
   0   9   7-4.06042 13.3285  37
   0   9  -7 5.47091 14.5481   9
   0   9   7-10.2299 17.3378  35
   0  -9   7-5.30759 16.8232   7
   0  -9   7 0.53307 11.5610  20
   0   9   7 21.4767 26.9892  36
   0   9  -7-10.3017 20.5392  33
   0   9  -7 2.08867 17.7138  19
   0  -9   8-4.82068 13.0551  37
   0   9   8 17.8442 20.1642  14
   0   9   8 0.93187 15.2316  37
   0  -9  -8 14.5249 23.4566  39
   0   9   8-4.03881 17.0968  35
   0   9   8 10.3452 19.0583  13
   0  -9   8-4.32662 12.9948  20
   0  -9  -8-20.0363 36.9083  29
   0   9   8-2.13816 13.7959  42
   0  -9  -8-3.35176 26.9308  40
   0   9  -8-29.9227 23.6854  23
   0   9  -8 20.9908 20.4803  41
   0   9   8 19.0579 18.6925  16
   0  -9   8-3.85379 10.8859  42
   0  -9  -8 0.74437 14.9617  19
   0   9   8-22.0025 31.4531  36
   0   9  -8 0.81291 20.8372  19
   0  -9  -9-23.7974 38.0854  28
   0  -9   9 6.90598 14.4018  20
   0   9   9 16.8302 14.3804  42
   0   9  -9-7.58045 21.5192  41
   0   9  -9 28.1874 23.0020  19
   0   9   9 22.3620 32.5186  36
   0  -9  -9 17.2367 17.1355  19
   0  -9   9 1.84494 13.1274  42
   0   9  -9 14.6058 22.3381  23
   0  -9  -9-33.0693 40.6801  29
   0   9   9 8.15366 17.8744  37
   0   9   9 11.5487 20.3234  14
   0   9  -9-1.32167 31.2911  34
   0  -9  -9 18.1367 29.6352  40
   0   9   9-1.16041 20.9510  16
   0   9   9-13.2399 21.8649  13
   0  -9  -9 6.07006 25.2915  39
   0   9   9 9.49824 17.1864  35
   0   9  10-3.89141 14.7341  42
   0  -9 -10 18.3191 28.5444  40
   0   9  10-17.8272 20.6197  37
   0   9  10 6.40339 21.7673  13
   0   9 -10 4.92461 23.4832  23
   0  -9  10 5.81249 13.4779  42
   0  -9 -10 6.05070 18.9384  19
   0   9 -10 1.34908 30.6734  34
   0   9 -10 0.96014 24.0350  19
   0  -9  10 5.14506 14.4526  20
   0   9  10-3.20028 19.3834  35
   0  -9 -10 10.5722 42.1451  29
   0   9  10-9.01340 20.2349  14
   0   9  10 1.13191 21.0354  16
   0   9 -10-27.4088 23.9869  41
   0  -9 -10-10.0086 26.8326  39
   0  -9 -10-13.1504 35.9464  28
   0  -9 -11 14.9639 29.9055  40
   0   9 -11 11.8336 31.6461  34
   0  -9 -11-5.69230 41.9027  29
   0   9 -11-4.69323 24.7808  19
   0  -9  11 15.3562 14.8999  20
   0   9 -11 18.6851 24.0226  41
   0  -9 -11 25.4303 21.6016  19
   0  -9  11 14.5303 12.4695  42
   0  -9 -11 7.40379 39.4359  28
   0   9  11 2.97743 19.6976  35
   0 -10   0 3752.35 252.894  26
   0  10   0 4375.71 254.798   6
   0 -10   0 3438.02 253.115   2
   0  10   0 2840.02 253.767  38
   0  10   0 2905.60 258.281  31
   0  10   0 4086.15 256.053  15
   0  10   0 3899.73 256.386  22
   0  10   0 3363.53 259.490  24
   0  10   0 3092.87 253.353  27
   0  10   0 3982.06 257.359   4
   0 -10   0 3695.44 252.847  21
   0 -10   0 3892.81 253.601  44
   0  10  -1 3347.41 261.571  27
   0 -10  -1 3861.37 260.997  21
   0 -10  -1 4266.91 261.380  44
   0  10   1 3007.66 261.503   8
   0  10  -1 3006.76 265.020  31
   0  10  -1 4449.55 260.682  19
   0  10  -1 3312.14 269.148  24
   0  10  -1 4118.49 265.668  15
   0  10   1 2759.56 262.114  38
   0  10   1 3705.89 266.036  24
   0  10   1 3973.60 265.076   4
   0  10   1 2669.49 265.544  32
   0  10  -1 3016.77 261.525  38
   0 -10   1 3628.10 260.699  26
   0 -10   1 3614.87 261.044   2
   0 -10  -1 3961.03 261.085  26
   0  10  -1 3955.43 263.668  22
   0 -10   1 3463.25 259.769  20
   0  10   1 4373.01 265.082   6
   0  10   1 3065.91 261.305  27
   0 -10  -1 4144.95 262.515  39
   0  10   1 3571.82 261.836  36
   0  10  -1 4574.02 261.063   6
   0 -10   1 4125.38 261.827  44
   0 -10   1 3627.59 260.706  21
   0 -10   1 3827.18 262.495  17
   0  10  -1 4205.00 265.514   4
   0  10   1 4276.99 263.120  15
   0  10   2 430.819 54.9857  32
   0  10  -2 669.999 49.7705  22
   0  10   2 736.809 53.4874  14
   0 -10   2 588.821 49.2693  17
   0  10  -2 522.073 47.7345  38
   0  10  -2 532.513 61.5774  33
   0 -10   2 633.740 46.4381  20
   0  10   2 461.205 49.2406   8
   0 -10   2 725.718 50.1403   7
   0  10   2 654.899 54.6331   6
   0 -10   2 627.268 47.5845  26
   0  10   2 509.067 47.9167  27
   0  10   2 636.203 48.9421  15
   0 -10  -2 744.194 51.2746  39
   0 -10  -2 666.621 47.4535  12
   0 -10   2 597.230 47.0307   2
   0  10   2 584.200 48.6293  36
   0 -10  -2 691.206 47.7849   2
   0  10  -2 480.757 50.9936  31
   0  10   2 671.820 51.7806  13
   0  10   2 627.438 55.4410  22
   0 -10  -2 770.521 47.2974  44
   0  10  -2 723.508 46.9394  19
   0  10  -2 563.760 64.2106  24
   0 -10   2 721.198 48.4232  44
   0  10   2 683.096 53.4152  16
   0  10   2 484.455 50.5989  38
   0 -10   2 607.134 47.5076  21
   0  10   2 656.559 51.7511   4
   0  10   3 1250.92 99.0225  24
   0  10  -3 1548.04 95.6570  19
   0 -10   3 1473.74 96.8388  44
   0  10   3 1422.35 100.548  16
   0 -10   3 1449.56 95.7303  26
   0 -10   3 1490.04 95.8070  21
   0 -10  -3 1793.00 102.615  28
   0  10   3 1460.90 100.708  14
   0  10  -3 1238.74 99.7235  41
   0 -10  -3 1508.96 96.8530   2
   0  10   3 1121.98 100.142   8
   0  10   3 1046.72 95.5156  35
   0  10   3 1488.49 106.592  22
   0 -10   3 1271.80 94.6605  20
   0  10   3 1037.87 100.323  38
   0 -10   3 1328.30 95.3845   2
   0  10   3 1255.46 99.6765  13
   0  10  -3 1063.29 98.0905  31
   0 -10  -3 1686.70 99.7745  39
   0  10  -3 1527.07 108.638  15
   0 -10   3 1624.00 99.3006   7
   0  10   3 1245.14 97.8451  36
   0 -10  -3 1590.85 96.7316  12
   0  10   3 1275.01 99.1050   4
   0 -10  -3 1386.90 95.5638   1
   0  10   3 1036.28 95.0278  37
   0  10   3 1029.36 96.1983  27
   0 -10   3 1254.74 93.7470  37
   0 -10   4 2713.68 188.880  42
   0  10   4 2183.40 196.574  38
   0  10   4 2393.04 194.029  13
   0  10   4 2615.95 198.979   8
   0 -10  -4 3243.40 191.968  12
   0 -10  -4 2788.87 190.558   1
   0  10  -4 2391.88 196.856  33
   0  10   4 2642.19 194.462  16
   0 -10   4 2705.01 188.562  37
   0 -10   4 2828.23 190.071  21
   0  10   4 2167.27 190.836  35
   0  10   4 3076.68 203.069  22
   0  10  -4 2579.00 201.139  15
   0 -10  -4 3540.12 196.995  28
   0  10   4 2652.98 198.304   6
   0  10  -4 2090.98 192.030  31
   0 -10   4 2960.22 191.533  44
   0  10   4 2235.41 191.577  27
   0  10  -4 2500.92 190.497   1
   0 -10   4 3404.93 194.821   7
   0 -10  -4 3225.48 192.177   2
   0 -10  -4 3341.86 194.401  39
   0  10   4 2003.33 189.831  37
   0  10   4 2470.92 192.821  24
   0  10   4 2759.36 194.692  14
   0 -10   4 3205.08 193.443  17
   0 -10   4 2874.73 190.105  26
   0  10  -4 2389.67 193.409  41
   0  10   4 2476.07 193.567  36
   0  10  -4 2582.20 203.528  34
   0  10  -4 2925.45 190.352  19
   0  10  -5 2585.95 216.573  41
   0  10   5 2693.39 217.888  13
   0 -10  -5 3291.32 214.434   1
   0  10   5 2728.17 221.835  38
   0 -10   5 3260.31 213.455  26
   0  10   5 3209.33 222.237   6
   0  10  -5 3051.84 213.896  19
   0  10  -5 2348.17 218.131  33
   0  10  -5 2798.31 223.230  15
   0 -10   5 3645.42 217.206  17
   0 -10   5 2956.18 212.300  42
   0 -10  -5 3519.75 215.417   2
   0  10   5 2301.56 213.566  37
   0  10  -5 3096.17 226.064  34
   0  10   5 2643.16 215.330  35
   0 -10   5 2981.45 211.999  37
   0  10   5 3492.08 227.686   8
   0  10   5 2865.00 218.887  36
   0  10  -5 2767.69 214.075   1
   0  10   5 2834.77 217.596  16
   0 -10   5 3308.40 214.869  44
   0  10   5 2848.16 217.557  14
   0 -10   5 3505.86 217.859   7
   0  10   5 2845.04 215.809  24
   0  10   5 2463.92 215.564  27
   0 -10  -5 3727.79 215.872  12
   0 -10  -5 3844.63 221.296  28
   0 -10   5 3361.32 213.545  21
   0 -10   6 150.764 21.3031  17
   0 -10   6 155.900 15.6340  37
   0  10   6 131.616 24.1446  13
   0  10  -6 157.658 41.8675  15
   0 -10  -6 162.536 18.5622   1
   0  10  -6 151.270 20.7977   1
   0 -10   6 128.476 16.6198  26
   0 -10  -6 155.309 34.4938  28
   0 -10  -6 165.068 26.9270  39
   0  10   6 107.244 18.5624  37
   0  10   6 175.904 31.0519  36
   0  10   6 134.668 23.0947  14
   0  10   6 118.214 28.3484   6
   0  10  -6 105.076 24.2868  41
   0 -10   6 130.614 21.3035   7
   0  10   6 117.298 23.5194  16
   0 -10  -6 167.564 19.8026  12
   0  10  -6 120.864 41.0348  34
   0 -10  -6 145.676 19.1929   2
   0 -10   6 120.463 16.7073  21
   0 -10   6 145.911 17.6152  44
   0  10  -6 54.2434 25.6323  33
   0 -10   6 141.441 15.3502  42
   0  10  -6 143.480 20.2783  19
   0  10   6 153.319 22.4129  35
   0 -10   7 240.229 24.7586  20
   0 -10  -7 325.467 34.4149  39
   0 -10  -7 282.239 25.8344  19
   0  10   7 210.691 26.5141  37
   0 -10  -7 280.291 36.9504  40
   0  10   7 217.799 29.2496  14
   0  10  -7 204.344 32.6084  41
   0 -10  -7 331.252 42.2774  28
   0  10  -7 201.920 46.3242  34
   0  10  -7 192.910 34.1052  33
   0  10   7 226.955 40.6330  36
   0  10   7 234.883 29.7127  16
   0 -10   7 289.566 23.8884  37
   0 -10   7 192.401 22.7302  42
   0  10   7 273.970 31.4078  13
   0  10  -7 226.700 27.6692  19
   0  10   8 1773.02 112.477  36
   0  10  -8 1128.48 105.135  34
   0  10   8 1314.68 100.246  14
   0  10   8 1344.58 102.209  13
   0  10  -8 1258.70 101.234  23
   0 -10   8 1408.19 95.9777  20
   0 -10  -8 1863.62 110.592  29
   0 -10  -8 1463.01 100.919  39
   0  10  -8 1062.76 99.5310  41
   0  10  -8 943.896 99.1042  33
   0  10  -8 1231.64 97.5692  19
   0  10   8 1305.90 100.269  16
   0 -10   8 1244.19 94.3149  42
   0  10   8 1384.13 99.8959  35
   0 -10  -8 1516.60 103.909  40
   0 -10  -8 1431.50 97.7052  19
   0  10   8 1195.69 97.7294  37
   0 -10  -8 440.722 109.413  28
   0  10   9 1121.17 92.3724  14
   0  10   9 1214.34 91.6703  35
   0  10  -9 1063.21 93.0270  23
   0  10   9 1595.33 104.679  36
   0  10  -9 914.477 92.5218  41
   0 -10  -9 1317.56 95.6297  40
   0  10   9 1024.70 90.3330  37
   0 -10   9 1196.87 87.9517  20
   0 -10  -9 1480.89 102.380  29
   0 -10  -9 1299.05 93.1124  39
   0 -10  -9 1493.39 90.7509  19
   0 -10   9 1032.28 86.4865  42
   0  10   9 1133.79 92.8901  16
   0  10  -9 998.588 89.8254  19
   0  10   9 1194.04 94.1525  13
   0 -10 -10 26.6031 40.7214  29
   0  10  10 1.16205 21.0107  16
   0 -10  10-1.45824 15.5543  20
   0  10  10 8.43688 18.3911  37
   0 -10 -10-2.39404 30.2494  40
   0  10 -10-14.0269 24.1776  23
   0  10  10 19.1501 20.4743  35
   0  10  10-1.15676 21.7996  14
   0  10 -10-24.7718 32.8617  34
   0  10  10-30.9649 23.0940  13
   0 -10 -10 13.8951 27.2868  39
   0  10 -10-17.3146 23.6373  41
   0 -10  10 10.2022 13.1574  42
   0  10 -10 15.9606 22.7998  19
   0 -10 -10-4.04363 40.6869  28
   0 -10 -10 20.0840 18.8062  19
   0 -10 -11 103.568 41.5525  29
   0  10  11 109.355 23.7085  35
   0  10 -11 82.3277 25.8710  19
   0 -10 -11 126.883 24.1293  19
   0 -10 -11 89.1094 40.8358  28
   0  10 -11 85.1796 27.6524  41
   0  10  11 88.4893 22.4774  37
   0  10 -11 93.1410 33.9609  34
   0 -10  11 116.031 18.9570  20
   0 -10  11 97.3088 16.7956  42
   0 -10 -11 125.228 32.5696  40
   0 -11   0 1.93161 11.8354  21
   0 -11   0 20.0545 7.33020  44
   0  11   0-7.01327 10.0437  36
   0 -11   0 5.42511 11.7613  26
   0  11   0-5.33221 12.2903  38
   0  11   0-9.40408 15.0155  22
   0  11   0-3.80455 21.0975   4
   0 -11   0-2.31985 16.2115  39
   0  11   0-10.1299 18.6245  15
   0  11   0-8.25344 30.6122  24
   0  11   0 4.12341 10.5275   6
   0 -11   0 1.37805 7.08671   2
   0  11   0 14.1263 8.25892  19
   0 -11   0-5.40674 11.6037  17
   0  11   0 10.9478 26.1420  31
   0  11   0-8.33265 19.3056  13
   0  11   0-1.64771 10.2886  27
   0  11   1 5.28024 8.44156  19
   0 -11   1 2.69075 12.4784  21
   0  11   1 5.32180 12.7282  38
   0  11  -1-0.55422 9.90610  27
   0 -11   1 4.22295 10.6719  17
   0 -11   1 4.44733 7.74521  44
   0  11   1 12.8079 22.2103  24
   0  11   1 5.03182 15.3461  15
   0  11  -1-1.60530 35.5676  24
   0 -11   1 4.87985 8.14284  20
   0 -11   1-0.89501 7.01489   2
   0  11   1-3.36746 10.9135  27
   0  11   1-1.02738 18.1396  22
   0  11  -1 40.6873 39.3038  33
   0 -11   1 18.1326 12.6652  26
   0  11  -1 0.87956 22.5655  15
   0  11   1-1.54303 29.1236  31
   0  11  -1 0.63784 7.83329  19
   0 -11  -1 0.40487 11.8538  26
   0  11   1 6.37021 17.2291  13
   0  11   1 23.0913 14.1022   6
   0 -11  -1 4.44130 12.1899  21
   0  11   1-36.0886 33.4019  32
   0 -11  -1 4.64027 6.92706  44
   0 -11  -1 13.3016 17.6318  39
   0  11   1-1.66171 10.5835  36
   0  11  -1 12.2691 13.2781  22
   0  11  -1 5.82752 20.7920  31
   0  11  -1-1.83574 10.3443  38
   0  11   1 4.78982 18.2738   4
   0 -11  -2 17.8205 6.00609   1
   0 -11  -2-2.80304 7.82047  12
   0 -11   2 0.53178 8.38672  44
   0 -11   2-2.36206 8.45507  20
   0  11   2-3.29393 19.7526   6
   0  11   2-10.5062 17.5533   4
   0 -11   2-1.74932 7.17772   2
   0  11   2 5.07324 21.4352  22
   0  11  -2-2.03279 17.7874  31
   0  11   2 12.2502 11.5077  27
   0 -11  -2-2.55800 6.74444   2
   0  11  -2-5.06809 40.7973  33
   0  11   2 1.50952 29.3883  31
   0  11   2-17.7540 20.8133  14
   0  11   2 15.0878 12.9798   8
   0  11   2-14.2527 18.3659  38
   0 -11   2 2.66697 12.2931  17
   0  11   2-2.58560 29.9444  32
   0  11   2-4.95907 21.3083  16
   0  11  -2 15.4643 8.42974  19
   0  11  -2-20.5326 41.5130  24
   0  11  -2-0.71538 11.7408  22
   0  11   2-8.60145 16.8655  13
   0 -11  -2-9.71873 17.9156  39
   0 -11   2-7.70405 11.8748   7
   0  11   2-8.73615 14.1435  15
   0  11   2-3.78287 11.1118  36
   0 -11   2 6.62740 12.1000  26
   0  11  -2-5.18776 10.1769  38
   0 -11   2-1.55362 12.2240  21
   0 -11   3 10.1911 9.14798  20
   0  11   3-6.08644 20.9602  38
   0 -11  -3 2.99539 6.24323   1
   0 -11   3 0.57292 10.0262  44
   0 -11   3 5.21346 11.7468  26
   0  11  -3 0.77401 9.05435  19
   0 -11  -3-0.55542 7.87290   2
   0 -11   3 0.79883 11.7437  21
   0  11   3-9.45785 17.4932  24
   0 -11   3-2.02640 6.44308  37
   0  11  -3-7.78421 34.9858  33
   0 -11  -3-2.61661 8.72595  12
   0  11   3 2.73136 12.9270  27
   0  11   3-14.3000 29.5275  22
   0  11   3 4.37892 17.0747   8
   0  11   3 3.79728 13.3378  36
   0 -11  -3 7.60752 20.3470  39
   0 -11   3 5.83413 14.0135  17
   0  11  -3-35.7064 37.0058  15
   0  11   3-2.62116 10.4944  35
   0  11   3 16.4469 20.2971  16
   0 -11   3 3.72393 12.3212   7
   0  11  -3 11.4549 16.4967  31
   0 -11   3-9.70897 7.61289   2
   0  11   3 1.40773 26.1197   6
   0  11   3-10.2204 19.9830  14
   0  11  -3-14.2887 22.2198  41
   0  11   3-13.1416 17.6353  13
   0  11   4-10.9996 25.7364   6
   0 -11  -4 1.93870 28.4651  28
   0  11   4 10.2501 16.3938  36
   0  11  -4 25.6686 15.4343  31
   0  11  -4-5.88620 20.9522  41
   0  11   4 27.2144 28.9243  38
   0  11  -4-24.7467 42.9612  15
   0  11  -4 4.71837 11.3031   1
   0 -11   4 4.49534 10.6915  20
   0 -11   4-0.42175 11.5117  26
   0 -11   4 0.78581 14.0176  17
   0  11   4-3.62270 15.7933  24
   0 -11  -4-2.45586 7.79662   1
   0  11  -4 25.2614 30.6784  33
   0  11   4-4.54218 25.8304   8
   0  11   4-4.23476 19.1414  14
   0 -11  -4 7.65588 10.9099  12
   0  11   4-1.84891 35.3713  22
   0  11   4-8.55818 14.1933  35
   0 -11   4-2.64934 7.61656  37
   0 -11   4-0.62993 7.24368  42
   0 -11  -4-7.95285 10.8568   2
   0  11   4-4.37194 10.5630  37
   0  11  -4 3.41566 50.3081  34
   0 -11   4 1.84489 9.69824  44
   0 -11  -4-2.33661 22.5086  39
   0 -11   4 19.1910 15.5792   7
   0  11   4-6.44868 15.5579  27
   0  11   4-5.32245 19.7823  16
   0 -11   4 2.94272 11.4495  21
   0  11  -4 10.2357 10.6569  19
   0  11   5-4.64121 18.5806  13
   0  11  -5-2.84148 42.7858  15
   0 -11   5 16.7115 16.2962  17
   0 -11   5 7.29876 10.9936  26
   0 -11   5 1.46324 7.74939  42
   0  11   5-12.1121 18.7065  27
   0  11  -5 21.2246 28.8026  33
   0 -11  -5 3.97315 10.4286   2
   0  11   5 5.58978 15.2372  35
   0 -11  -5 6.57511 11.7565  12
   0 -11   5 0.45494 10.6310  21
   0  11  -5 13.2008 13.2274   1
   0 -11   5 7.96873 8.53774  37
   0  11   5 15.1732 31.8221  38
   0  11   5 23.4034 29.0890   6
   0  11  -5 11.0671 12.8165  19
   0  11   5 8.82173 15.6884  24
   0  11  -5-7.31997 22.2576  41
   0  11   5-3.25331 12.1560  37
   0 -11   5-1.79919 16.0802   7
   0  11  -5-48.9238 47.8272  34
   0 -11   5 20.2305 11.1415  44
   0 -11  -5 19.8647 32.3076  28
   0  11   5-3.82163 29.8062   8
   0 -11  -5 13.0455 9.10950   1
   0  11  -6-32.4259 24.4704  41
   0 -11  -6-7.20288 13.8213  12
   0  11  -6 41.5215 42.3653  34
   0  11   6 2.54241 18.7822  13
   0 -11   6-7.37442 9.66509  42
   0  11   6-6.76281 13.0573  37
   0  11   6 10.7566 19.6151  16
   0  11  -6 11.4779 24.9355  33
   0 -11   6 4.06432 12.8245  44
   0  11   6-11.9444 18.5673  35
   0  11  -6-8.83466 36.7100  15
   0  11  -6-11.7751 16.4919  19
   0  11   6-10.6959 20.0091  14
   0 -11  -6 12.6913 13.0625   2
   0 -11  -6 7.16085 11.7904   1
   0 -11   6-5.05716 9.94782  37
   0  11   6 1.70571 14.2490  24
   0 -11   6 0.51903 11.4496  26
   0 -11   6 5.69583 11.6496  21
   0 -11  -6-26.6709 25.8425  39
   0 -11   6-0.85114 16.9931  17
   0  11   6 5.79220 24.5196  36
   0 -11  -6-26.9799 34.0783  28
   0 -11   7 2.02679 10.4281  42
   0  11   7 20.3866 30.6140  36
   0  11  -7-16.5789 25.4950  33
   0  11   7 1.73543 14.2404  37
   0 -11  -7 3.86092 26.4800  39
   0  11   7-1.01890 18.0822  35
   0 -11  -7 1.33274 34.2747  28
   0  11  -7-6.09508 39.1554  34
   0  11   7-1.23561 20.8029  14
   0 -11  -7-4.68244 13.9420  19
   0  11  -7-14.5477 18.4748  19
   0  11   7 7.45447 20.3074  16
   0  11   7 12.2359 19.3748  13
   0  11   8 5.62488 20.0421  13
   0 -11   8 49.9937 17.6559  42
   0 -11   8-7.78866 16.0664  20
   0  11  -8-9.04351 26.5560  41
   0 -11  -8 2.81630 37.9290  28
   0 -11  -8-12.6594 15.1309  19
   0  11  -8-32.2010 24.6113  19
   0  11  -8-26.3395 27.9270  23
   0  11  -8-17.8743 30.1665  33
   0  11   8 22.0991 33.7373  36
   0  11   8-17.3786 16.3818  37
   0 -11  -8-8.88608 28.7014  39
   0  11   8-1.27649 20.1328  14
   0  11   8-1.28305 20.2364  16
   0  11  -9 20.1103 24.8370  23
   0  11  -9 13.1728 35.8045  34
   0 -11  -9-15.8774 17.3744  19
   0 -11  -9-7.74187 29.0376  39
   0  11  -9-4.05352 22.8794  41
   0 -11   9 0.70199 15.4678  20
   0  11   9 11.4398 21.5641  16
   0  11   9-23.8361 36.3555  36
   0  11   9 10.1214 20.9307  14
   0 -11  -9 41.4125 40.0707  28
   0 -11  -9 9.67234 29.7903  40
   0 -11   9 1.24140 13.3204  42
   0  11   9-11.1109 21.1243  13
   0  11  -9-11.6705 22.8402  19
   0  11   9-16.3360 17.9632  37
   0  11  10 1.18489 21.3161  16
   0 -11 -10 4.26448 41.3196  29
   0  11  10-1.05691 21.3862  35
   0  11  10 6.45332 22.5470  13
   0 -11  10-3.76998 12.9812  42
   0  11  10-1.17961 21.2213  14
   0  11 -10-15.4866 23.1769  19
   0 -11  10 16.5735 15.2981  20
   0 -11 -10 15.3284 42.1888  28
   0 -11 -10 4.01835 17.8259  19
   0  11 -10 18.8747 25.8305  41
   0 -11 -10 19.9132 30.0007  40
   0 -11 -10-11.6111 28.6889  39
   0  11  10-11.1220 19.1413  37
   0  11 -10-2.61877 24.7883  23
   0  11  11-1.88694 17.7797  37
   0 -11  11 2.94961 13.1137  42
   0 -11 -11 26.5009 38.6889  29
   0  11 -11-5.92140 25.3532  23
   0 -11  11 1.37746 15.0214  20
   0  11  11 6.57914 18.4548  35
   0  11 -11 5.16390 32.5678  34
   0 -11 -11-15.8070 19.9683  19
   0  11 -11 19.9139 25.5161  41
   0  11 -11-14.6391 24.8209  19
   0 -11 -11 9.46153 28.1883  40
   0  11  11 8.84092 20.9529  13
   0 -11 -11-13.4355 39.7247  28
   0 -12   0 4022.53 365.340   2
   0  12   0 4175.99 376.148  24
   0  12   0 4629.16 366.271  36
   0  12   0 5179.41 371.216  15
   0  12   0 9455.34 367.407  19
   0  12   0 4632.00 366.188   6
   0  12   0 3827.60 368.827  22
   0  12   0 2935.65 365.976  38
   0 -12   0 4455.25 365.525  44
   0  12   0 3122.75 373.493  31
   0 -12   0 6717.96 377.042  39
   0 -12   0 4496.11 366.705  17
   0  12   0 3404.63 365.593  27
   0  12   1 3630.63 309.677  27
   0  12   1 3674.11 320.210  31
   0 -12   1 4391.10 309.131  21
   0  12   1 3278.83 310.982  38
   0 -12   1 4386.01 309.140  26
   0  12  -1 4535.18 323.852  24
   0  12   1 4765.51 311.944  15
   0  12   1 4544.15 313.681  13
   0 -12   1 4967.38 311.568  17
   0 -12   1 4974.25 310.141  44
   0 -12   1 4550.83 309.271   2
   0  12  -1 3253.58 314.703  31
   0 -12  -1 4105.44 309.551  26
   0  12  -1 5287.91 308.753  19
   0  12  -1 4406.04 314.352  15
   0  12   1 5114.00 317.559  14
   0 -12  -1 4288.42 309.046  12
   0  12  -1 4291.00 312.536  22
   0  12  -1 3319.31 320.006  33
   0 -12   1 4221.25 307.694  20
   0  12   1 4809.75 316.101   4
   0  12   1 4984.39 313.107   6
   0  12  -1 3563.63 309.981  38
   0 -12  -1 5182.94 309.565  44
   0  12   1 5311.85 318.099  16
   0  12   1 4232.19 317.302  24
   0  12  -1 3947.03 309.853  27
   0 -12  -1 4610.43 309.772   2
   0 -12  -1 4154.50 309.529  21
   0  12   1 4130.61 315.125  22
   0  12   1 4257.17 310.144  36
   0  12   1 4554.57 308.373  19
   0 -12  -1 4732.96 310.941  39
   0 -12  -2 1252.64 92.9637   1
   0  12   2 1340.07 102.736  16
   0  12   2 1298.38 96.2877  15
   0  12   2 1372.42 102.309   6
   0 -12   2 1465.48 97.1051  17
   0  12  -2 1318.94 97.2156  22
   0  12   2 1002.90 95.8851   8
   0 -12  -2 1443.52 95.1186   2
   0 -12   2 1319.38 93.9487   2
   0  12   2 1285.99 104.917  22
   0  12  -2 974.749 111.012  24
   0  12   2 1322.81 99.7572  13
   0  12  -2 1134.57 113.207  33
   0  12  -2 1093.90 94.9430  38
   0  12   2 1154.51 100.008   4
   0  12  -2 1038.58 99.5690  31
   0 -12   2 1320.23 92.9368  20
   0 -12   2 1421.88 94.5135  26
   0 -12   2 1304.31 94.2119  21
   0  12  -2 1493.05 93.7477  19
   0  12   2 1034.05 95.0022  27
   0 -12  -2 1641.55 98.7722  39
   0  12   2 1247.35 101.961  24
   0  12   2 811.432 104.667  32
   0  12   2 1170.97 95.6918  36
   0  12  -2 1358.29 105.288  15
   0  12   2 1311.84 102.369  14
   0 -12   2 1442.67 95.3174  44
   0 -12  -2 1372.51 94.6592  12
   0  12   2 1243.55 109.463  31
   0 -12   3 3675.64 284.879  20
   0 -12  -3 4729.91 287.836  12
   0 -12  -3 4123.68 285.867   1
   0  12   3 3939.96 296.033   6
   0  12  -3 4269.59 296.901  15
   0  12  -3 3688.45 291.799  41
   0 -12   3 4139.04 286.081  26
   0  12   3 3445.80 290.539   8
   0  12   3 4389.61 293.726  16
   0  12   3 3063.99 291.846  38
   0  12   3 4190.46 300.365  22
   0  12   3 3851.80 291.345  24
   0  12   3 3904.92 291.377  13
   0 -12   3 4369.25 286.380   2
   0  12   3 3147.26 287.315  27
   0  12  -3 2777.06 289.491  31
   0  12   3 4460.55 293.725  14
   0 -12  -3 4702.03 287.918   2
   0  12  -3 3388.48 297.839  33
   0 -12  -3 5071.67 290.942  39
   0 -12   3 3883.45 284.033  37
   0  12   3 3721.22 288.619  36
   0 -12   3 5002.69 289.891   7
   0 -12   3 4210.44 286.144  21
   0  12  -3 4552.06 286.145  19
   0 -12   3 5020.12 290.657  17
   0  12   4 1907.81 154.887   8
   0  12   4 1727.87 148.040  27
   0 -12   4 2132.96 144.799  20
   0 -12  -4 2199.80 145.540   1
   0 -12  -4 2579.06 147.915   2
   0  12   4 2408.08 165.125  22
   0  12  -4 1490.58 148.053  31
   0  12   4 1768.12 150.392  13
   0 -12   4 2013.55 145.151  21
   0  12   4 1963.84 152.197  16
   0  12  -4 1963.81 158.314  15
   0  12   4 1923.56 152.106  14
   0 -12   4 2430.37 147.709  44
   0  12   4 1774.44 149.263  36
   0  12  -4 1532.13 159.905  34
   0 -12  -4 2579.37 151.679  39
   0 -12  -4 2661.04 154.915  28
   0  12   4 1455.57 145.428  35
   0 -12   4 1925.42 143.244  37
   0  12   4 1559.38 154.611  38
   0 -12   4 2107.75 143.982  42
   0 -12   4 2598.61 150.311   7
   0 -12   4 2725.42 151.035  17
   0 -12   4 2084.21 145.284  26
   0  12  -4 2199.23 145.585  19
   0  12  -4 1910.59 151.258  41
   0  12   4 1759.42 149.438  24
   0 -12  -4 2513.42 147.883  12
   0  12   4 1551.67 144.904  37
   0  12   5 2441.87 170.065   8
   0 -12   5 2121.32 153.050  21
   0 -12  -5 2500.15 163.877  28
   0 -12   5 2166.86 152.113  42
   0 -12   5 2467.23 155.589  44
   0  12   5 1773.67 157.437  27
   0  12  -5 1706.98 168.288  34
   0 -12   5 2885.56 159.459   7
   0 -12  -5 2794.11 156.485   2
   0 -12   5 2067.35 151.535  37
   0  12  -5 1940.44 153.916   1
   0  12  -5 1971.14 164.986  15
   0 -12  -5 2627.87 159.772  39
   0  12  -5 2217.06 153.890  19
   0 -12   5 2260.95 153.001  20
   0  12   5 1992.91 157.000  24
   0  12  -5 1833.82 158.496  41
   0  12   5 1627.81 154.518  35
   0  12   5 1512.02 153.181  37
   0 -12   5 2826.38 159.525  17
   0  12  -5 1686.90 161.252  33
   0  12   5 1898.83 165.928  38
   0  12   5 1982.40 159.987  14
   0  12   5 2241.71 165.870   6
   0 -12   5 2130.05 153.088  26
   0  12   5 2082.72 160.262  16
   0  12   5 1643.88 158.008  13
   0 -12  -5 2933.12 157.055  12
   0 -12  -5 2337.74 154.030   1
   0 -12   6 261.791 23.8422  21
   0 -12   6 215.713 21.5313  42
   0  12  -6 213.616 45.6054  15
   0 -12  -6 252.620 26.0526  12
   0  12  -6 201.831 51.8708  34
   0 -12  -6 232.919 45.0924  28
   0  12   6 233.156 31.1441  13
   0 -12   6 260.734 23.7018  26
   0  12   6 213.723 28.6604  35
   0  12   6 176.970 35.2395  36
   0 -12   6 320.122 30.6495  17
   0  12   6 250.921 28.0770  24
   0  12  -6 213.578 33.4533  41
   0  12   6 193.981 25.0297  37
   0  12  -6 215.307 25.4088  19
   0  12  -6 144.842 35.4916  33
   0  12   7 2373.82 154.786  36
   0 -12  -7 2183.26 147.140  39
   0 -12  -7 2536.04 154.176  28
   0 -12   7 1825.13 139.459  42
   0  12   7 1830.62 146.689  14
   0  12  -7 1785.51 146.496  41
   0  12  -7 1928.97 148.226  23
   0 -12   7 2723.84 146.336  17
   0  12  -7 1446.96 145.980  33
   0  12   7 1478.82 141.313  37
   0  12   7 1808.64 146.797  16
   0  12  -7 2007.99 154.272  34
   0  12   7 1882.71 147.410  13
   0 -12  -7 1993.35 141.387  19
   0  12  -7 1755.88 141.638  19
   0 -12  -7 2416.79 144.201  12
   0  12   7 2013.99 144.908  35
   0  12  -8 292.294 34.3705  19
   0  12   8 281.102 32.2821  37
   0  12   8 276.480 36.5133  14
   0 -12  -8 308.155 31.2955  19
   0  12  -8 236.558 39.7699  23
   0 -12   8 295.666 29.6316  42
   0  12   8 295.684 37.5982  16
   0  12   8 386.289 38.8454  13
   0  12  -8 370.610 54.0346  34
   0  12   8 353.178 36.0176  35
   0  12  -8 262.578 41.2947  33
   0 -12  -8 370.866 42.6390  39
   0  12   8 432.680 49.9591  36
   0  12   9 699.137 64.1336  13
   0  12   9 686.779 59.5624  37
   0 -12   9 713.420 56.1485  42
   0  12  -9 635.118 64.6493  41
   0 -12   9 742.283 57.7207  20
   0  12   9 637.733 62.6345  16
   0 -12  -9 889.054 59.3474  19
   0  12  -9 626.369 69.6210  34
   0  12   9 968.690 75.9929  36
   0  12  -9 593.626 59.4924  19
   0  12   9 632.192 62.9016  14
   0 -12  -9 801.221 65.5333  39
   0 -12  -9 868.668 76.1889  28
   0  12  -9 648.962 65.0648  23
   0  12 -10 10.7980 26.3903  41
   0  12  10-16.6916 19.7353  37
   0  12  10 1.28047 22.6459  13
   0 -12 -10-0.91268 30.7762  39
   0  12 -10-28.2807 36.5442  34
   0 -12  10-1.23398 13.9545  42
   0  12 -10 18.6189 26.3331  23
   0 -12 -10-13.7671 20.3836  19
   0  12  10 21.4444 22.8593  14
   0 -12  10 2.83404 15.1140  20
   0  12 -10 1.77573 21.9545  19
   0  12  10 6.32089 31.5481  36
   0  12  10-10.7688 22.4449  16
   0 -13   0-5.86250 17.1923  26
   0 -13   0-5.86473 10.7114   2
   0  13   0 5.88054 18.8702  22
   0  13   0 5.18431 13.4370  27
   0  13   0-0.91255 14.4871  38
   0  13   0 10.6227 10.9212  19
   0 -13   0-8.49989 17.0924  21
   0  13   0-20.2177 37.8084  31
   0  13   0 24.7569 39.4106  24
   0  13   0-27.8928 28.0691  15
   0  13   0 21.3630 29.4113  13
   0 -13   0-22.4864 15.3453  17
   0 -13   0-5.41494 21.5852  39
   0 -13   0-5.12865 10.2371  44
   0  13  -1-4.86658 12.8472  38
   0  13  -1-46.5507 50.8796  24
   0 -13  -1-2.12559 8.32572  44
   0 -13   1 0.78578 14.6717  17
   0  13  -1 25.3714 28.3925  13
   0  13   1-8.75515 32.6940  24
   0  13  -1 6.15625 16.5653  22
   0 -13  -1 6.65387 16.5574  26
   0 -13   1-5.19635 10.7477  20
   0  13   1-17.3597 23.9703  13
   0 -13  -1-8.28447 22.7514  39
   0  13   1 9.77298 22.7273  22
   0  13   1 7.13207 43.7616  31
   0  13   1-12.8178 28.4333   4
   0  13   1 0.71531 12.8470  36
   0 -13  -1-4.97883 9.59844   2
   0 -13   1 14.5695 17.1565  26
   0  13   1-5.37857 15.1509  27
   0  13   1-5.20428 16.6677   6
   0  13  -1 0.85916 10.1005  19
   0 -13  -1-0.57346 9.61826  12
   0 -13   1 3.06782 10.7949  44
   0  13   1 13.0982 20.0409  15
   0  13  -1-20.0124 30.1753  15
   0 -13   1-4.00886 9.41812   2
   0  13   1 4.22429 17.2619  38
   0 -13  -1 3.86980 16.5780  21
   0 -13   1-11.4058 16.9398  21
   0  13  -1 26.3428 50.0692  33
   0  13   2-16.4366 15.8851  27
   0  13   2 6.92437 44.3527  31
   0  13   2-10.6226 31.5102  14
   0 -13  -2-0.79511 24.9409  39
   0  13  -2 2.32245 52.0784  24
   0 -13   2 0.78096 10.9951  20
   0  13   2-21.0025 31.5390  22
   0 -13   2 5.66403 15.0921  26
   0  13   2-5.62115 14.5913  36
   0  13  -2-2.30967 12.0886  38
   0  13  -2-7.27159 25.8541  31
   0 -13   2 0.51302 14.9221  21
   0 -13   2-6.10198 9.55217   2
   0  13  -2 13.4496 15.9246  22
   0  13   2 12.0167 25.5784  24
   0  13  -2 12.1706 52.3561  33
   0  13  -2-14.0188 36.3185  15
   0 -13  -2-0.46224 6.84706   1
   0  13   2 5.51382 16.8431  15
   0 -13   2-0.65526 10.1520  44
   0  13   2 1.25829 22.5225   6
   0 -13   2 4.33342 15.0596  17
   0  13   2-14.0345 25.6681   4
   0  13   2 16.7952 32.3753  16
   0  13  -2-1.35122 10.9682  19
   0  13   2-26.5901 25.0334  13
   0 -13  -2 1.86014 10.8129  12
   0 -13  -3 5.73842 18.2837  26
   0  13   3-9.99688 26.8444  38
   0 -13   3-3.76838 17.5372  17
   0  13   3 17.4922 37.3732  22
   0  13   3 21.0744 29.1390  16
   0 -13  -3 4.45153 18.0543  21
   0  13   3-14.4514 20.7758   8
   0 -13  -3-2.02703 11.6586  12
   0 -13  -3 7.57795 10.8911   2
   0 -13  -3 1.99028 7.62540   1
   0  13   3 2.78701 17.4016  27
   0 -13   3-0.84147 11.7025  20
   0 -13   3-4.32435 8.43238  37
   0  13   3-6.76589 30.7858   6
   0  13  -3 5.36444 11.2760  19
   0 -13   3 0.51422 14.2715  21
   0  13   3 19.1657 22.6377  13
   0  13  -3 3.86339 21.3482  31
   0  13  -3 24.6732 47.2162  33
   0  13   3-2.66908 22.1230  24
   0  13  -3 1.60797 43.2133  15
   0 -13   3 3.61407 14.4096  26
   0  13   3 14.9642 29.6309  14
   0  13   3-15.0086 17.1022  36
   0  13   4-6.78732 22.5021  13
   0  13  -4-17.6395 39.7637  33
   0  13   4-8.18797 35.3760  38
   0 -13  -4 1.96868 28.8875  39
   0  13  -4 21.4496 30.4811  41
   0 -13   4-3.64866 15.4171   7
   0  13   4 4.92575 26.1752   8
   0  13  -4-1.22464 19.5234  31
   0 -13  -4 0.73459 12.2261  12
   0  13  -4 7.51264 13.1639  19
   0  13   4-10.5352 28.1013  16
   0 -13   4 0.39711 8.27884  42
   0 -13  -4 10.3897 8.79337   1
   0  13   4 6.09813 20.6131  24
   0 -13   4 2.00714 18.9996  17
   0 -13   4-8.93587 14.4527  21
   0 -13  -4 1.46704 12.5621   2
   0  13   4 8.97825 27.3237  14
   0  13   4-16.1595 21.6834  27
   0  13  -4 5.09717 45.5576  15
   0  13   4 9.93540 37.3321   6
   0  13   4 2.22235 18.4925  36
   0  13   4 5.04895 42.6652  22
   0 -13   4 5.98205 12.0092  20
   0 -13   4 5.80165 14.0252  26
   0 -13   4 7.08130 9.13292  37
   0 -13   4 2.25052 12.6314  44
   0 -13   5-12.2661 13.1677  20
   0 -13   5-2.74983 12.5590  21
   0  13   5 11.2637 25.3584  27
   0 -13  -5-1.32563 38.8050  28
   0  13  -5-9.08477 14.5051  19
   0 -13  -5-11.6162 28.0153  39
   0 -13   5-0.44122 9.06025  42
   0 -13   5 1.10289 12.9164  26
   0  13  -5-9.48019 19.2524  31
   0  13   5 10.1697 18.2444  24
   0 -13   5 6.23237 18.9991  17
   0  13  -5-16.2243 46.5508  15
   0 -13   5-2.56783 10.7748  37
   0  13   5-5.97519 24.9574  16
   0  13   5-6.76641 38.7659  38
   0  13  -5-47.8072 28.1936  41
   0  13   5 1.34530 23.0807  36
   0 -13  -5-7.88927 14.1948  12
   0  13  -5-13.9378 33.0831  33
   0  13   5 8.62196 17.2616  35
   0  13  -5 3.70807 52.4894  34
   0  13   5 4.45647 24.5760  14
   0  13   5-9.92910 48.7405  22
   0  13   6 19.4678 22.9362  13
   0  13  -6 3.24043 30.2042  33
   0 -13   6 5.87253 12.6165  21
   0  13   6 4.07417 13.5600  37
   0  13   6-4.79879 27.4420  36
   0 -13  -6 12.9901 39.3099  28
   0 -13   6-1.13726 12.1299  20
   0  13   6-1.03934 17.2961  24
   0  13   6-3.00870 25.0345  16
   0  13  -6 29.9531 41.6729  15
   0  13  -6-7.50731 16.3119  19
   0  13  -6-10.7781 26.6023  41
   0  13   6-10.4705 27.6218  14
   0 -13   6 8.24198 13.0867  26
   0 -13   6 4.45738 10.6026  42
   0 -13  -6-19.0879 17.2974  12
   0 -13   6 5.24095 19.8134  17
   0  13  -6 1.81640 48.9237  34
   0  13   6-15.7154 19.5288  35
   0  13   7 29.9028 20.2188  35
   0 -13  -7 9.01920 31.4607  39
   0  13  -7 12.0229 42.8838  34
   0 -13  -7-34.9866 43.2110  28
   0  13   7-8.97854 24.4104  14
   0  13  -7-4.59924 28.5360  33
   0  13   7-18.0523 26.0931  16
   0 -13  -7-12.6503 18.4368  12
   0  13   7 8.13807 14.7813  37
   0 -13   7-7.90190 20.0404  17
   0 -13  -7-4.79861 14.0917  19
   0  13  -7-20.6926 28.0252  41
   0 -13   7 0.55897 11.7537  42
   0  13   7-1.81175 32.2088  36
   0  13  -7-1.52705 17.9352  19
   0  13   7-21.4565 23.8518  13
   0  13   8 2.89674 16.7172  37
   0 -13  -8-13.2841 32.0123  39
   0  13  -8-4.42803 28.6120  23
   0  13   8-26.5914 34.7383  36
   0  13  -8 37.9863 28.8429  41
   0  13  -8 2.95745 28.0787  33
   0 -13  -8 5.13241 15.1859  19
   0  13  -8-16.0914 41.8224  34
   0  13   8-20.3107 25.1172  16
   0  13   8-15.4327 21.1200  35
   0  13   8 15.8786 23.4982  14
   0 -13  -8 21.6362 42.1827  28
   0  13  -8-0.83291 20.4117  19
   0  13   8 15.1520 23.4208  13
   0 -13   8-1.81865 13.4906  42
   0 -13  -9-70.3024 46.7126  28
   0  13   9 6.79141 24.1888  16
   0  13   9 5.40548 34.0595  36
   0  13  -9-18.3300 39.5410  34
   0  13  -9 4.29358 28.5733  23
   0  13   9 7.81454 17.3662  37
   0  13   9-27.0446 25.5223  14
   0 -13  -9-3.73985 16.0515  19
   0  13   9 29.9278 23.3892  13
   0  13   9-12.8977 21.9498  35
   0  13  -9-22.3439 29.1796  33
   0 -13   9 1.25046 14.2764  42
   0  13  -9-2.60868 21.1561  19
   0 -13  -9 4.17051 32.3607  39
   0  13  10 16.7084 23.3684  16
   0  13  10-24.5730 22.4660  35
   0 -13 -10 33.7465 32.3032  39
   0  13  10-0.92203 17.3766  37
   0  13  10-13.8678 33.0654  36
   0  13 -10-7.98470 28.9587  23
   0  13 -10-2.65846 26.1737  41
   0  13 -10 26.1601 35.4387  34
   0 -13 -10-30.4260 42.8279  28
   0  13  10 11.3072 21.4746  13
   0  13  10-4.75393 22.7375  14
   0 -13 -10 1.44023 17.2287  19
   0  13 -10-23.8372 22.4451  19
   0 -13  10-3.01320 13.9881  42
   0  14   0 361.326 44.1460  19
   0 -14   0 459.079 45.2455   2
   0  14   0 297.847 59.1042  13
   0  14   0 334.735 47.3501  27
   0  14   0 327.559 48.4258  38
   0  14   0 317.842 56.9928  15
   0  14   0 386.022 78.7489  24
   0  14   0 297.963 103.051  31
   0 -14   0 596.586 49.4510  17
   0 -14   0 352.395 48.4529  21
   0 -14   0 476.710 46.4503  12
   0 -14   0 365.211 48.5765  26
   0  14   1 663.399 114.808  31
   0  14   1 1117.52 92.4104  36
   0  14   1 1136.12 100.878  22
   0  14  -1 965.705 92.3806  38
   0 -14   1 1159.65 89.8172  20
   0 -14  -1 1435.22 91.4132  44
   0 -14  -1 1286.27 91.7072  12
   0  14  -1 1246.78 100.823  15
   0 -14   1 1310.64 91.2142   2
   0  14  -1 1372.77 90.7397  19
   0  14   1 813.701 93.8398  38
   0  14   1 928.258 92.1743  27
   0  14   1 1435.78 109.671  24
   0 -14  -1 1347.17 91.9027   2
   0 -14  -1 1279.24 92.9120  21
   0 -14   1 1430.43 92.2195  44
   0  14  -1 966.420 114.968  33
   0  14  -1 1173.85 118.041  24
   0 -14  -1 1340.64 93.0477  26
   0 -14  -1 1430.31 96.1719  39
   0 -14   1 1312.37 92.2912  26
   0  14   1 1067.67 94.8212  15
   0  14   1 1241.61 100.143  13
   0  14   1 1288.75 94.5038   6
   0 -14   1 1426.03 94.7631  17
   0  14  -1 1050.34 94.9155  22
   0 -14   1 1287.97 92.2927  21
   0  14  -2 201.815 26.7593  22
   0  14   2 255.354 49.0022  14
   0 -14   2 220.440 22.1646  20
   0  14  -2 217.745 22.2439  19
   0  14   2 186.668 45.5159  16
   0 -14   2 230.727 25.6331  21
   0 -14  -2 244.861 35.1413  39
   0  14  -2 183.265 44.8704  15
   0  14   2 226.143 40.5002  24
   0 -14   2 244.641 22.1942   2
   0 -14  -2 204.485 19.6791   1
   0  14  -2 164.716 23.3839  38
   0  14   2 171.385 26.2167  27
   0  14   2 118.269 41.2264  22
   0 -14   2 306.558 29.2297  17
   0  14   2 199.464 28.0198  15
   0 -14   2 219.028 23.5229  44
   0  14   2 185.533 35.1543  13
   0  14  -2 168.066 35.3792  31
   0  14   2 219.067 59.8404  31
   0  14  -2 166.395 64.8870  33
   0  14   2 161.071 25.1409  36
   0  14  -2 195.656 60.8424  24
   0  14   2 212.379 33.1669   6
   0 -14   2 215.161 24.9755  26
   0  14   3 240.009 36.5127  27
   0 -14   3 357.747 29.7421  37
   0 -14   3 372.092 32.4530  20
   0  14   3 267.770 46.4299  38
   0 -14  -3 417.928 34.4659  12
   0 -14  -3 409.094 37.9885  26
   0  14   3 382.228 50.5496  16
   0  14   3 338.888 43.6681  13
   0 -14  -3 401.590 31.2585   1
   0  14   3 308.347 48.8460   6
   0  14   3 310.066 48.6719  14
   0  14  -3 362.275 55.0541  15
   0 -14  -3 426.077 45.4498  39
   0  14   3 299.547 36.8806  36
   0 -14   3 395.183 34.2849  26
   0  14   3 424.863 45.5823  24
   0  14  -3 284.317 40.8118  31
   0 -14   3 405.776 34.3370  21
   0 -14  -3 410.182 38.1940  21
   0  14   3 368.311 59.2287  22
   0 -14   3 463.791 38.7612  17
   0  14  -3 235.874 65.6048  33
   0  14  -3 392.011 32.9141  19
   0 -14   4 337.702 29.8064  21
   0 -14  -4 414.454 43.8081  39
   0  14   4 286.833 50.0717  38
   0 -14  -4 348.736 34.3732  21
   0  14   4 243.919 36.2062  27
   0 -14   4 254.940 25.6609  42
   0  14   4 263.035 44.7180  16
   0  14  -4 287.282 29.0636  19
   0  14  -4 227.294 56.8342  33
   0  14  -4 188.654 33.9535  31
   0 -14  -4 414.755 35.4564  26
   0  14   4 315.634 38.4855  24
   0 -14   4 299.426 25.7983  37
   0  14   4 341.786 62.8008  22
   0  14  -4 318.858 47.3752  41
   0 -14   4 314.019 28.3512  20
   0  14   4 220.146 38.3841  13
   0  14   4 263.597 34.7298  36
   0  14  -4 238.929 56.2786  15
   0 -14  -4 387.441 31.0164  12
   0  14   4 286.084 44.4405  14
   0 -14   4 337.605 29.8486  26
   0 -14  -5 1750.79 118.446  39
   0  14   5 1823.72 139.085  22
   0  14   5 1313.38 116.135  36
   0 -14   5 1977.87 116.985  17
   0  14  -5 1292.43 117.484  41
   0  14   5 1462.89 115.249  24
   0  14  -5 1218.88 123.447  15
   0  14   5 1207.97 116.251  13
   0  14  -5 1486.61 109.715  19
   0 -14  -5 1820.48 113.021  12
   0  14   5 1324.87 119.320  14
   0  14   5 1407.28 120.071  16
   0 -14   5 1729.06 109.183  20
   0 -14   5 1513.82 109.118  21
   0 -14  -5 1731.41 124.067  28
   0  14   5 1310.55 116.187  27
   0  14   5 1399.22 129.253  38
   0  14  -5 928.821 112.093  31
   0 -14   5 1535.60 107.853  42
   0 -14   5 1455.58 108.912  26
   0  14   6 174.034 35.0072  16
   0  14   6 128.118 34.1833  14
   0 -14   6 188.251 22.4397  26
   0  14  -6 205.656 24.6917  19
   0  14  -6 70.5330 46.1047  15
   0  14  -6 148.367 39.5273  23
   0  14  -6 98.7250 52.0550  34
   0 -14   6 221.808 28.9990  17
   0 -14  -6 171.301 47.7518  28
   0  14  -6 116.493 37.7968  33
   0  14   6 198.960 28.4007  24
   0 -14   6 198.320 20.2932  42
   0 -14  -6 223.216 26.4177  12
   0  14  -6 142.232 35.3612  41
   0 -14   6 199.801 22.5679  21
   0 -14   6 226.489 22.2738  20
   0 -14  -6 209.896 39.5654  39
   0  14  -7 18.6097 36.1677  15
   0 -14  -7 93.9037 18.0949  19
   0  14   7 67.8935 27.1500  13
   0 -14   7 68.2814 15.3828  42
   0 -14  -7 119.474 48.0232  28
   0  14  -7 46.4025 32.5523  33
   0 -14  -7 48.2294 36.1459  39
   0  14  -7 22.4764 33.5818  23
   0  14  -7 46.7112 30.1932  41
   0  14  -7-1.75801 46.2478  34
   0 -14  -7 98.9692 22.2111  12
   0 -14   7 133.238 25.5601  17
   0 -14   7 75.5290 17.7428  20
   0  14  -7 53.8534 19.6452  19
   0  14   8 323.618 47.6181  14
   0  14  -8 168.423 37.4022  33
   0 -14   8 221.649 24.7122  42
   0  14  -8 214.405 29.0979  19
   0  14   8 222.479 35.3041  13
   0 -14  -8 232.950 26.7103  19
   0  14  -8 169.330 37.6369  41
   0 -14  -8 285.863 42.7773  39
   0  14  -8 115.313 39.5581  23
   0  14   8 419.434 49.3230  16
   0  14  -8 176.568 49.8966  34
   0  14   8 217.812 45.6783  36
   0  14   9 816.228 66.6740  13
   0  14   9 753.162 66.2381  16
   0  14  -9 680.834 67.4820  41
   0  14  -9 642.919 61.1877  19
   0 -14  -9 876.503 80.2608  28
   0 -14   9 740.832 58.1275  42
   0 -14  -9 865.148 60.5059  19
   0  14  -9 555.481 66.3937  33
   0 -14  -9 864.652 69.3128  39
   0  14  -9 738.064 69.0247  23
   0  14  -9 546.783 71.9759  34
   0  14   9 880.180 74.9250  36
   0  14   9 689.830 65.9317  14
   0  14  10 122.365 27.7963  14
   0 -14 -10 166.759 36.0939  39
   0 -14 -10 118.886 45.3537  28
   0  14  10 113.068 25.9979  13
   0  14  10 100.624 27.0315  16
   0 -14 -10 137.947 21.3144  19
   0 -14  10 138.947 18.8471  42
   0  14 -10 109.917 24.9304  19
   0  14 -10 24.9139 32.2503  23
   0  14 -10 117.566 38.5347  34
   0  15   0-24.5535 35.9041  13
   0  15   0 14.5533 51.3870  24
   0  15   0 120.755 26.4592  38
   0 -15   0-7.44200 13.3657   2
   0 -15   0-10.4388 16.8871  17
   0  15   0-23.3368 52.0362  31
   0  15   0-6.12899 14.1280  19
   0  15   0 10.4211 29.2416  15
   0 -15   0 0.96925 15.7780  20
   0  15   0 27.5184 24.8867  22
   0 -15   0 7.10549 12.1900  12
   0 -15   0-46.5697 26.2873  21
   0 -15   1 8.54183 12.0072   2
   0  15  -1-6.29625 60.8488  24
   0 -15  -1-5.89217 20.6954  26
   0  15   1-12.4769 21.2820  38
   0  15   1-6.04191 17.3390  27
   0 -15  -1-5.87363 21.4510  21
   0  15   1-16.0708 24.0745  15
   0  15  -1 39.2137 35.1103  15
   0 -15   1-0.98800 14.2110  20
   0  15  -1 8.46162 16.2747  38
   0 -15   1-1.92815 17.2853  17
   0 -15  -1 4.35266 27.7848  39
   0  15   1-21.6186 33.8274  13
   0 -15   1-8.92137 18.8675  26
   0  15   1 40.0214 58.1582  31
   0  15  -1 2.25367 14.2377  19
   0 -15  -1 6.02137 12.3773  12
   0  15  -1-10.8016 21.3857  22
   0 -15   1 2.73508 19.1204  21
   0  15   1-7.48008 41.7364  24
   0  15   1 14.7684 29.4288  22
   0  15   2 42.2004 35.9978  24
   0 -15   2-0.66980 18.1083  26
   0  15   2-10.3180 21.7727  15
   0  15   2-21.5661 45.1175  14
   0  15   2-6.88966 35.7397  22
   0 -15   2-7.62710 14.2288  20
   0  15  -2 1.16156 13.4798  19
   0  15   2 15.1791 20.2440  27
   0  15  -2-0.97779 15.0455  38
   0  15   2 37.9553 59.6055  31
   0 -15   2 29.8197 18.4719  17
   0  15  -2 7.36240 18.6193  22
   0  15   2-8.86066 17.2602  36
   0 -15  -2-21.0037 30.9200  39
   0  15   2 20.7916 26.5027   6
   0  15  -2-2.94164 58.7277  24
   0  15  -2-24.1891 39.2015  15
   0  15  -2-9.19409 64.5117  33
   0  15   2 11.7159 30.2610  13
   0  15  -2-7.83877 30.1536  31
   0  15   2-4.33845 46.6585  16
   0 -15   2 2.00141 17.9692  21
   0  15   3 18.1758 30.3659  24
   0 -15   3 6.50987 17.2835  26
   0 -15  -3-16.3638 25.0924  26
   0 -15   3 8.01348 10.3133  37
   0 -15  -3 17.7173 31.8342  39
   0 -15   3-4.61341 19.3813  17
   0  15  -3-3.04291 14.1398  19
   0  15   3 25.5399 39.6769  14
   0 -15   3-13.8347 14.9729  20
   0  15   3 4.84424 22.2217  27
   0 -15  -3-21.2120 24.4506  21
   0 -15  -3-5.99228 13.7925  12
   0  15  -3-11.4050 47.2524  15
   0  15   3 8.56446 40.7179  16
   0  15   3-35.7834 31.9146  13
   0 -15   3-6.48400 17.3995  21
   0  15   3 1.11695 18.3684  36
   0  15   3 33.8790 43.8378  22
   0  15  -3 49.9172 60.8165  33
   0  15  -3-25.8711 28.9268  31
   0  15   3 10.6056 35.0906  38
   0 -15  -4 9.45808 26.2699  26
   0  15   4 22.2863 53.4090  22
   0  15   4 12.2209 38.4527  16
   0  15   4-28.3508 37.4253  14
   0  15  -4 840.552 60.0752  31
   0 -15   4 603.357 31.7195  26
   0  15   4-20.7302 30.1123  24
   0  15   4 17.8575 27.7493  27
   0 -15   4 657.778 32.0178  21
   0 -15   4 488.859 23.7683  42
   0  15   4 12.1434 30.4916  13
   0 -15   4 479.665 26.2375  20
   0  15  -4 1630.76 106.491  33
   0 -15  -4 1.78729 17.0249  12
   0  15  -4 1773.71 92.0934  23
   0  15  -4 744.235 73.4930  15
   0  15   4 10.1563 42.7881  38
   0  15   4 9.00842 22.4047  36
   0 -15  -4-29.1587 27.4642  21
   0 -15  -4-23.0074 36.5065  39
   0  15  -4 293.820 24.8335  19
   0  15   5-11.7029 34.9120  16
   0  15  -5 0.70480 15.4418  19
   0  15   5 67.0000 55.8796  22
   0 -15  -5-12.6259 36.1060  39
   0  15  -5-8.85595 22.9698  31
   0 -15  -5 16.9744 25.4801  21
   0  15   5 2.71743 47.8080  38
   0  15   5-15.5107 34.0503  14
   0 -15  -5-11.6436 25.9845  26
   0  15   5 8.45099 21.7715  24
   0  15  -5 5.41939 45.8434  15
   0 -15   5-5.02072 24.1194  17
   0  15   5 19.4078 23.7483  36
   0  15  -5-13.1828 35.6100  41
   0  15   5 19.2957 28.4378  13
   0 -15  -5 4.61176 16.3970  12
   0 -15   5-0.53238 11.1376  42
   0 -15   5-2.63686 15.2999  26
   0 -15   5-6.01143 15.1652  20
   0  15   5-1.54249 30.5841  27
   0  15  -5-21.9630 41.6150  23
   0 -15   5 0.65748 15.0115  21
   0 -15   6-6.07971 23.0541  17
   0  15  -6-74.8628 43.0946  15
   0  15   6-1.82341 31.3393  14
   0 -15   6-6.41796 14.1724  20
   0  15   6 9.82615 21.1880  24
   0 -15  -6-27.2572 26.1543  26
   0  15  -6 12.9322 17.8856  19
   0  15  -6-3.90559 35.0716  33
   0  15  -6 10.9350 36.5332  23
   0  15   6-5.50132 31.1679  16
   0 -15  -6-16.7059 19.0518  12
   0 -15  -6 22.6570 25.9855  21
   0  15  -6 9.45238 33.3646  41
   0 -15   6 2.08286 15.2802  21
   0 -15  -6-55.7614 49.3084  28
   0 -15   6-0.69590 15.1255  26
   0 -15   6 13.7218 12.4127  42
   0 -15  -6-2.57431 37.0036  39
   0  15  -7-17.7837 34.3733  33
   0 -15   7 2.25525 22.6651  17
   0  15   7 31.0941 31.0767  16
   0  15  -7-8.45590 33.6711  23
   0  15  -7-53.5290 38.2417  15
   0  15  -7-28.5514 47.4184  34
   0  15  -7-3.25102 19.1653  19
   0 -15  -7 7.59986 14.6322  19
   0  15   7-1.83062 31.6938  36
   0  15   7 42.2005 26.6785  13
   0  15  -7-30.4499 33.9183  41
   0 -15   7 1.22120 13.5435  42
   0  15   7 22.3413 30.6040  14
   0 -15  -7-18.8675 20.1251  12
   0 -15  -7 38.9797 47.7234  28
   0 -15   7 4.76211 14.9892  20
   0 -15  -8 30.7102 37.6791  39
   0 -15   8 0.70083 16.3803  20
   0 -15  -8-11.9383 16.0840  19
   0  15  -8-4.67811 42.3764  34
   0 -15   8-3.15996 14.3393  42
   0  15   8 12.8021 33.8268  36
   0  15   8-47.3341 29.9149  13
   0  15  -8 7.60084 19.5022  19
   0  15  -8 32.2034 29.8148  41
   0 -15  -8-29.9548 48.1817  28
   0  15  -8 53.4151 32.4469  33
   0  15  -9-5.47722 29.8307  41
   0 -15   9 4.13647 17.3179  20
   0 -15  -9 7.45229 16.1773  19
   0 -15  -9 21.6605 44.3106  28
   0  15   9 17.7914 25.3934  16
   0  15  -9 4.36375 28.3998  33
   0  15   9-15.3736 25.5612  13
   0  15  -9 4.32865 28.4509  23
   0  15   9-3.30820 33.6911  36
   0  15  -9-6.69918 20.8351  19
   0  15   9 14.9919 26.4578  14
   0 -15   9 0.61944 14.6071  42
   0  15  -9-11.4105 39.7179  34
   0 -15  -9-20.1250 35.6489  39
   0  16   0 1404.16 143.645  31
   0  16   0 1269.30 121.226  22
   0  16   0 1315.91 128.527  13
   0  16   0 1412.43 121.478  15
   0 -16   0 1726.34 116.649  21
   0 -16   0 1506.99 112.686  20
   0 -16   0 1913.08 117.872  17
   0 -16   0 1727.36 115.212  12
   0  16   0 1106.83 116.687  38
   0 -16   0 1652.64 116.203  26
   0  16   0 1708.30 145.408  24
   0  16   1 129.562 50.0001  24
   0 -16   1 197.343 26.8753  26
   0 -16  -1 127.037 20.5974  12
   0  16   1 114.116 24.1295  27
   0  16  -1 131.019 49.1703  31
   0  16   1 189.995 71.4259  31
   0 -16   1 171.551 25.9156  17
   0  16  -1 119.197 27.9334  22
   0  16  -1 129.517 24.2613  38
   0 -16   1 158.113 21.1116  20
   0  16   1 102.960 29.0064  38
   0  16  -1 168.014 39.7229  15
   0 -16  -1 147.820 20.9211  20
   0 -16   1 179.743 26.8176  21
   0  16   1 183.562 42.5139  13
   0 -16  -1 169.875 28.7481  21
   0  16   1 78.1879 34.2346  22
   0 -16  -1 142.988 27.9161  26
   0 -16  -1 171.120 35.1581  39
   0  16  -1 182.387 67.8806  24
   0  16   1 146.513 32.4970  15
   0  16  -1 139.280 20.8826  19
   0 -16   1 176.759 21.2830  12
   0  16   2 1872.07 154.867  15
   0  16   2 1841.33 153.578  36
   0 -16   2 2327.08 152.827  26
   0 -16   2 2819.25 158.692  17
   0  16   2 2259.09 169.068  24
   0  16  -2 1704.86 152.804  38
   0  16   2 1443.72 153.199  27
   0  16  -2 2185.18 151.169  19
   0 -16   2 2518.41 152.595  12
   0  16  -2 2153.81 165.288  15
   0 -16   2 2324.59 152.891  21
   0  16   2 1958.63 168.290  22
   0  16  -2 1654.54 155.441  22
   0 -16  -2 2736.05 159.913  39
   0  16  -2 1427.22 162.037  31
   0  16   2 1622.56 161.773  13
   0 -16   2 2167.16 150.485  20
   0  16   2 2399.95 188.420  31
   0 -16  -2 2506.54 154.457  12
   0  16  -2 1382.55 175.740  33
   0 -16   3 515.479 39.2695  20
   0  16   3 384.106 69.2280  22
   0 -16  -3 446.675 41.3027  12
   0  16  -3 478.083 39.9920  19
   0  16   3 534.345 67.4996  14
   0 -16   3 597.647 47.7734  17
   0  16   3 346.157 43.0845  36
   0 -16   3 511.012 41.4406  21
   0 -16  -3 487.946 46.5015  21
   0  16  -3 284.200 81.7018  33
   0  16   3 413.857 55.4542  24
   0  16   3 428.516 66.0031  16
   0  16   3 333.581 52.9881  13
   0 -16  -3 541.616 54.6833  39
   0  16  -3 428.781 66.8018  15
   0  16  -3 199.791 46.3726  31
   0  16   3 355.592 56.4485  38
   0 -16   3 503.120 41.6383  26
   0 -16  -3 538.560 47.0769  26
   0  16   3 291.514 45.2002  27
   0 -16   4 1065.32 71.9647  42
   0  16   4 638.016 81.9325  13
   0 -16  -4 1074.29 85.4369  39
   0 -16   4 1018.98 73.0018  20
   0  16   4 742.951 94.1477  38
   0 -16  -4 1217.06 77.1507  12
   0  16  -4 590.185 78.7779  31
   0 -16   4 988.033 74.4640  26
   0 -16   4 972.459 74.5180  21
   0  16  -4 948.813 73.8333  19
   0  16  -4 871.590 97.3213  23
   0 -16  -4 1048.90 79.0976  21
   0  16   4 723.870 80.0791  27
   0 -16  -4 984.458 78.9238  26
   0  16   4 1037.14 93.2666  14
   0  16   4 944.433 92.2581  16
   0  16   4 792.454 77.9492  36
   0  16   4 969.503 84.8809  24
   0  16   4 999.005 106.581  22
   0 -16   4 1280.08 82.7994  17
   0  16  -4 632.640 91.9867  15
   0  16  -4 799.386 99.4037  33
   0  16   5 45.4761 58.3425  22
   0 -16   5 9.35784 24.1001  17
   0 -16   5 10.3231 15.8556  20
   0  16  -5 14.9243 46.8662  15
   0  16  -5 9.65693 25.5023  31
   0 -16   5 4.07805 11.2987  42
   0  16  -5 16.7592 47.0153  33
   0 -16  -5 25.4710 18.5031  12
   0  16   5-21.3011 39.5917  14
   0 -16  -5 28.8654 27.7969  21
   0  16   5 1.90811 30.9417  13
   0  16   5 18.4871 25.2420  36
   0 -16   5 21.0866 17.4590  26
   0  16   5 11.2821 46.5731  38
   0  16  -5 8.56218 46.3163  23
   0 -16  -5-12.2696 38.6020  39
   0  16   5-19.7942 32.9389  27
   0  16  -5 12.7955 17.1277  19
   0  16   5 12.3061 25.4071  24
   0 -16  -5-14.4696 27.9222  26
   0  16   5 57.8541 38.4894  16
   0 -16   5 5.80328 16.9355  21
   0  16  -6 1137.12 115.234  19
   0  16   6 1501.25 120.625  24
   0 -16  -6 2038.55 120.036  12
   0 -16   6 2531.27 126.980  17
   0  16   6 1347.84 123.893  13
   0 -16  -6 1514.83 119.719  26
   0 -16   6 1635.48 116.289  26
   0 -16   6 1735.59 116.518  21
   0  16  -6 1366.52 128.445  15
   0  16  -6 1295.54 125.866  41
   0 -16   6 1707.91 115.803  20
   0 -16  -6 1816.10 127.464  39
   0 -16  -6 1704.64 119.892  21
   0  16   6 1372.93 126.958  16
   0  16   6 1385.93 124.345  36
   0  16   6 1292.30 126.001  14
   0 -16   6 1499.63 114.411  42
   0  16  -6 1387.55 128.818  23
   0 -16   7 424.032 37.0572  20
   0  16  -7 285.889 52.8537  33
   0  16   7 356.630 49.4486  14
   0  16   7 370.457 50.6475  36
   0  16  -7 284.217 50.3788  41
   0 -16  -7 522.023 40.9966  12
   0  16  -7 302.423 38.3119  19
   0 -16  -7 369.906 44.1701  26
   0  16  -7 458.119 54.8938  23
   0  16   7 390.687 50.9058  16
   0 -16   7 547.844 45.5809  17
   0 -16   7 363.323 35.1190  42
   0 -16  -7 375.735 35.9662  19
   0 -16  -7 412.475 43.9281  21
   0 -16  -7 535.934 65.0733  28
   0 -16  -8 259.237 27.3009  19
   0 -16  -8 280.375 55.6951  28
   0 -16  -8 286.747 47.0974  39
   0 -16  -8 232.471 35.7338  26
   0  16  -8 193.859 41.1733  41
   0  16   8 200.500 39.4260  14
   0  16  -8 228.880 42.2913  33
   0 -16  -8 250.643 35.1899  21
   0  16  -8 189.251 30.6469  19
   0  16   8 288.406 44.3611  36
   0 -16   8 239.875 27.4500  20
   0  16   8 210.825 39.5935  16
   0 -16   8 217.880 25.7324  42
   0  16   8 231.101 37.3626  13
   0  16  -8 269.812 42.5100  23
   0 -16   9 2.00452 16.8138  20
   0  16  -9-8.95456 23.2798  19
   0  16   9 10.7016 26.5608  16
   0  16   9-29.3103 28.3526  14
   0  16   9 33.6736 25.1497  13
   0  16  -9-21.5760 29.9053  33
   0 -16  -9-9.42788 43.0332  28
   0  16  -9-9.17178 30.2876  41
   0 -17   0 19.8713 17.6078  20
   0 -17   0 10.6079 23.5978  21
   0  17   0-11.4922 26.1042  22
   0  17   0 14.5611 22.2012  38
   0  17   0 19.1767 32.4234  15
   0  17   0 25.6482 59.5237  24
   0 -17   0-31.9368 24.7061  26
   0  17   0-22.8917 58.3008  31
   0 -17   0 7.22276 15.3495  12
   0  17   1 10.2251 23.0881  38
   0  17   1-6.43769 49.1860  24
   0  17   1 8.96949 43.5933  13
   0 -17  -1-7.45254 24.6560  26
   0 -17   1 25.5023 23.0165  21
   0 -17  -1 9.28307 25.2089  21
   0 -17   1-6.82507 22.1561  26
   0  17  -1-12.6646 38.5944  15
   0  17  -1 14.2064 20.7203  38
   0 -17  -1-27.9399 33.5696  39
   0 -17  -1-8.05702 18.3030  20
   0 -17   1 7.86870 21.0541  17
   0  17  -1-15.6156 51.7690  31
   0  17   1-9.94168 29.5647  15
   0  17   1 18.3261 33.9296  22
   0  17  -1 33.8893 66.0137  24
   0 -17   1 6.23859 17.5544  20
   0  17   1-72.1480 73.4769  31
   0 -17  -1 14.2330 16.3090  12
   0 -17   1-7.76465 15.5213  12
   0  17  -1 1.66059 24.5961  22
   0  17   2-6.04022 31.3332  38
   0  17  -2-45.8144 37.6052  31
   0 -17   2-21.3908 23.1810  26
   0  17   2-9.41241 21.9334  27
   0 -17   2-12.4527 20.9252  17
   0  17  -2 14.3858 18.9469  38
   0  17  -2 9.47234 67.6748  33
   0  17   2-19.0404 43.8225  24
   0  17  -2 25.9224 43.2411  15
   0 -17  -2-0.98909 16.9057  12
   0  17   2-39.0425 43.7868  22
   0 -17  -2-16.2747 35.8147  39
   0  17   2 57.9471 72.8005  31
   0 -17   2 0.63309 17.2802  20
   0  17  -2 30.4045 22.9582  22
   0 -17   2 18.0290 21.7902  21
   0  17   2 16.3488 24.1659  15
   0  17   2 37.8066 39.2627  13
   0 -17   2-0.82580 15.6571  12
   0  17  -3-7.41965 19.2279  19
   0  17   3 2.18688 37.7273  13
   0  17   3-6.34303 21.4861  36
   0 -17  -3-9.23050 18.6110  12
   0 -17   3 0.79576 20.3695  21
   0 -17  -3 12.0859 28.7098  26
   0  17  -3-23.5909 32.2368  31
   0 -17   3 17.4489 17.8124  20
   0  17   3 8.84370 27.0054  27
   0 -17  -3-9.03704 29.2287  21
   0 -17   3 1.34348 22.7105  17
   0  17  -3 84.6814 66.7731  33
   0 -17  -3 27.2217 39.2947  39
   0 -17   3-10.3763 20.7339  26
   0 -17   4 14.0835 18.9673  26
   0 -17  -4 2.09276 18.1511  12
   0  17   4 33.2782 47.8390  38
   0 -17  -4 31.7279 29.5790  21
   0  17   4 3.23798 31.2030  27
   0  17   4 11.2706 25.3887  36
   0  17   4 3.57307 63.4110  22
   0 -17   4 2.34115 18.7071  21
   0 -17  -4-18.1517 42.5239  39
   0  17   4 29.6081 35.7432  13
   0 -17   4 15.4030 25.1923  17
   0  17  -4 1.90379 28.6837  31
   0  17  -4-8.33618 51.7161  15
   0 -17   4-11.2912 17.3894  20
   0  17   4-15.4294 29.8132  24
   0  17  -4 5.87838 57.8745  33
   0 -17   4 5.45106 12.2912  42
   0  17  -4 19.2063 19.1501  19
   0  17   4-44.6564 49.5978  16
   0 -17  -4 4.10551 29.8932  26
   0  17   4-59.1631 49.6824  14
   0  17   5 23.0027 27.5574  24
   0 -17  -5-14.3140 19.9351  12
   0  17  -5-26.3653 49.6393  23
   0  17   5 42.7890 41.3226  14
   0 -17   5 3.87301 18.0339  26
   0 -17   5-5.68395 27.8237  17
   0 -17   5-2.73475 16.6350  20
   0  17   5 24.4221 34.0677  13
   0  17   5 6.55951 60.9507  22
   0 -17   5 8.13357 12.9609  42
   0 -17  -5 8.20588 30.1975  21
   0  17  -5 22.4433 28.5615  31
   0  17   5-14.1564 50.5919  38
   0 -17  -5-3.08581 30.5088  26
   0  17   5-13.5882 43.4548  16
   0 -17  -5-17.0323 42.1501  39
   0 -17   5 0.77274 18.1162  21
   0  17   5 9.34521 26.8199  36
   0  17  -5-15.1999 52.8674  33
   0  17  -5 0.79783 19.5182  19
   0  17   5 24.2452 35.6876  27
   0  17  -5 51.0894 50.6599  15
   0 -17  -6 30.8449 30.6047  26
   0  17  -6 27.1194 44.0491  15
   0  17  -6-18.2210 21.0753  19
   0 -17  -6-6.99065 41.9785  39
   0 -17  -6 6.86308 19.2282  12
   0  17   6 6.69648 30.6210  36
   0 -17   6 3.84990 17.6760  21
   0 -17  -6 26.7901 29.8823  21
   0  17   6-14.3805 37.6358  16
   0 -17   6 12.5751 15.9226  20
   0 -17   6 29.3583 25.4948  17
   0  17   6 14.9135 24.2704  24
   0 -17   6 5.80767 14.0476  42
   0 -17   6-0.77169 18.0229  26
   0  17   6 24.9376 32.2369  13
   0  17  -6-62.6344 43.8453  23
   0  17   6-2.04360 35.2550  14
   0 -17  -7 16.4918 29.6077  21
   0 -17  -7 11.6985 19.5274  12
   0  17   7 11.9343 32.2838  36
   0  17   7 78.9856 32.3694  13
   0  17   7-5.36482 33.6043  14
   0  17   7 37.7364 34.6392  16
   0  17  -7 5.05272 22.3514  19
   0  17  -7-39.6621 39.8602  33
   0  17  -7 13.9179 39.5622  23
   0 -17  -7 18.0316 15.9780  19
   0 -17   7-3.49864 24.9471  17
   0 -17   7 9.15412 16.8773  20
   0 -17  -7-0.91879 29.5983  26
   0 -17   7 4.56390 15.1947  42
   0  17  -7 4.59997 35.7020  41
   0  17   8-1.53716 31.0227  16
   0 -17  -8 5.74555 16.5155  19
   0  17   8-19.9069 30.9457  14
   0  17  -8 11.4732 34.4607  33
   0  17  -8-81.2366 38.2042  23
   0  17  -8-16.5772 32.7038  41
   0 -17  -8-26.4180 28.2812  26
   0 -17   8 4.11944 17.6167  20
   0  17   8 10.7137 29.7562  13
   0 -17  -8 8.11249 40.7081  39
   0  17   8 1.60520 32.4389  36
   0 -17  -8-54.2807 29.8683  21
   0 -17  -8 28.8067 50.0098  28
   0 -17   8 8.85209 15.3583  42
   0  18   0 1432.51 149.686  31
   0 -18   0 1833.98 113.160  20
   0 -18   0 1549.14 116.197  21
   0  18   0 1500.03 122.528  15
   0 -18   0 1562.43 116.015  26
   0  18   0 1017.54 115.382  38
   0 -18   0 1689.24 114.777  12
   0  18   0 1110.57 120.167  22
   0  18   0 1639.92 148.421  24
   0  18   1 408.510 56.0072  15
   0  18  -1 1725.44 126.239  24
   0  18   1 367.063 61.6556  22
   0 -18   1 608.305 49.3284  12
   0  18   1 345.605 72.2998  13
   0 -18  -1 579.845 50.0305  12
   0  18  -1 1894.88 114.404  31
   0 -18   1 574.258 52.1809  21
   0 -18   1 728.079 54.0945  17
   0 -18  -1 525.802 53.7216  26
   0 -18   1 507.737 51.6845  26
   0 -18   1 492.925 47.3640  20
   0 -18  -1 469.351 53.4733  21
   0  18   1 626.181 83.2222  24
   0  18   1 348.937 54.7368  38
   0  18  -1 573.845 59.4721  22
   0  18   1 492.771 99.4318  31
   0  18  -1 410.624 51.4984  38
   0 -18  -1 584.163 50.7754  20
   0  18  -1 1448.59 84.3354  15
   0  18  -2 55.4314 47.0662  31
   0 -18   2 149.801 24.3986  20
   0  18  -2 193.438 49.1446  15
   0 -18  -2 97.8871 25.6208  20
   0 -18   2 194.741 29.1379  21
   0  18   2 126.130 30.6911  15
   0  18   2 128.892 49.8938  22
   0  18  -2 135.891 32.4537  22
   0 -18   2 192.615 29.8615  17
   0  18   2 159.389 75.7263  31
   0  18   2 90.4344 37.7103  38
   0 -18  -2 256.898 43.0014  39
   0 -18  -2 199.156 26.3277  12
   0  18  -2 145.450 26.7864  38
   0 -18   2 140.403 27.9770  26
   0  18   2 196.401 51.1209  13
   0  18   2 184.408 52.7586  24
   0 -18   3 310.523 29.2457  42
   0 -18  -3 283.642 42.5385  26
   0 -18  -3 303.295 41.9921  21
   0 -18   3 317.547 36.1614  26
   0 -18   3 301.429 32.2676  20
   0 -18   3 300.363 35.3577  21
   0  18   3 223.408 52.7111  13
   0  18  -3 211.212 46.8373  31
   0  18   3 187.337 52.1268  38
   0  18  -3 230.102 72.1092  33
   0  18   3 315.398 66.9944  22
   0 -18  -3 356.206 52.0345  39
   0 -18   3 437.194 41.4623  17
   0 -18   4 1013.69 77.1264  26
   0  18   4 641.752 82.7112  27
   0  18  -4 575.618 83.6772  31
   0 -18   4 1495.42 87.9029  17
   0 -18  -4 1178.56 91.3574  39
   0  18   4 889.088 96.1697  14
   0  18   4 745.979 96.2965  38
   0 -18  -4 1208.51 80.5197  12
   0  18   4 743.237 89.0825  13
   0  18   4 967.354 89.3215  24
   0 -18  -4 1003.98 83.6669  26
   0 -18  -4 936.390 83.4649  21
   0  18  -4 623.420 92.8380  15
   0 -18   4 1073.26 74.7831  42
   0  18   4 906.652 96.9051  16
   0 -18   4 1062.46 77.3694  21
   0 -18   4 985.023 75.8017  20
   0  18   4 1020.04 110.243  22
   0  18  -4 847.856 104.025  33
   0 -18  -5 631.691 49.3440  12
   0 -18   5 516.089 44.6974  26
   0 -18   5 499.523 44.5580  21
   0  18   5 389.060 64.1602  16
   0  18   5 535.090 81.1086  22
   0 -18   5 461.922 41.5573  42
   0 -18  -5 680.236 66.3514  39
   0 -18  -5 463.781 52.9017  21
   0  18   5 451.101 65.3245  14
   0  18  -5 328.307 51.6673  31
   0  18  -5 347.585 67.2355  33
   0  18  -5 390.194 64.8485  15
   0 -18  -5 523.750 54.5288  26
   0  18   5 374.153 68.2272  38
   0  18   5 468.905 53.4840  24
   0  18   5 382.893 51.2690  36
   0  18   5 456.630 59.5895  13
   0 -18   5 542.335 43.7233  20
   0 -18   5 709.555 54.8940  17
   0  18   6 23.2552 24.5138  24
   0  18   6 16.1764 37.2400  16
   0 -18   6-2.37661 20.0882  26
   0 -18   6 17.3911 19.7897  21
   0 -18   6 13.3139 15.4957  42
   0 -18   6 29.8496 17.6292  20
   0  18  -6-3.80916 43.1374  23
   0 -18  -6 19.0996 32.7156  26
   0 -18   6 25.3442 26.8734  17
   0  18   6 48.2993 38.6327  14
   0  18  -6 38.8132 41.5193  15
   0 -18  -6 29.0705 33.0232  21
   0  18   6 32.8978 33.4640  13
   0 -18  -6 16.5935 21.2730  12
   0 -18  -6-5.64240 46.1982  39
   0  18  -6-34.9674 43.8252  33
   0  18   6 19.3202 29.4220  36
   0 -18  -7 87.0215 32.6640  21
   0  18   7 88.4139 37.0969  14
   0 -18  -7 106.153 19.4240  19
   0 -18  -7 29.6177 24.0861  12
   0 -18   7 182.856 29.7659  17
   0  18   7 89.2423 33.6471  13
   0 -18   7 117.163 21.1070  20
   0  18  -7 110.028 40.7741  23
   0 -18   7 103.401 19.4782  42
   0 -18  -7 84.9973 44.9654  39
   0  18  -7 56.0547 43.0414  33
   0  18   7 88.8031 37.2104  16
   0 -18  -7 118.758 32.9534  26
   0 -19   0 5.88040 21.2285  20
   0  19   0-21.6034 28.3509  38
   0 -19   0 5.37421 19.1407  12
   0 -19   0-24.9336 31.4719  26
   0  19   0-30.8647 35.0697  22
   0  19   0 4.24434 71.1837  31
   0 -19   0 41.4113 29.6451  21
   0  19   0 27.2311 62.0149  24
   0  19   0-1.77005 38.0278  15
   0  19   1-33.1000 38.8125  15
   0  19  -1-50.5288 41.3340  15
   0 -19   1 5.97042 27.1174  26
   0 -19   1-2.94612 21.0434  20
   0 -19  -1-25.6690 23.8820  12
   0  19   1-28.4169 45.4385  22
   0 -19  -1 33.8026 41.5636  26
   0  19   1-24.5673 31.7932  38
   0  19  -1-24.9993 31.4679  22
   0  19  -1 64.7571 66.3545  24
   0 -19   1 19.2342 22.8952  17
   0  19   1-3.53470 64.0631  24
   0  19  -1-4.44394 23.0335  38
   0 -19  -1 41.2922 41.8976  21
   0 -19   1 2.97381 27.0542  21
   0 -19   1-5.17059 20.0286  12
   0  19   1-40.1252 86.3351  31
   0  19  -1 21.5931 59.5894  31
   0 -19  -2 7.95306 21.4437  12
   0  19  -2-35.5118 47.4774  31
   0 -19   2-8.54419 25.5897  21
   0 -19   2 25.7044 25.3722  26
   0  19  -2-10.4826 29.4708  22
   0 -19  -2-1.25255 39.2683  39
   0 -19   2-6.67765 24.9750  17
   0  19   2-5.25352 50.2524  13
   0 -19   2-7.35745 20.7448  20
   0  19   2 2.98141 47.2226  22
   0  19   2 15.1674 49.1781  24
   0 -19  -2-0.73434 21.4690  20
   0  19  -2 18.8138 45.0163  15
   0  19   2-21.9851 34.0601  38
   0  19   2 1.40432 27.4965  15
   0 -19   3 12.8913 27.2394  17
   0  19  -3-2.46957 38.2594  31
   0  19   3 6.70099 55.6476  22
   0 -19  -3-10.9136 23.4191  20
   0  19   3 27.3457 45.0960  13
   0  19  -3 51.9202 62.8384  33
   0 -19   3-10.8593 15.5927  42
   0 -19  -3-33.0507 36.0048  21
   0 -19   3-1.78885 22.9835  21
   0  19   3 17.6221 40.3881  38
   0 -19   3 4.40188 20.1703  20
   0 -19   3-0.89711 23.2788  26
   0 -19  -3 12.5788 33.8536  26
   0 -19  -3 56.4808 43.3070  39
   0 -19   4 15.4082 18.9017  20
   0 -19  -4 12.2294 21.2701  12
   0  19  -4-46.5873 36.2622  31
   0  19   4-30.2180 44.0719  13
   0 -19   4 10.9102 14.0171  42
   0 -19  -4-17.9981 35.9990  21
   0 -19  -4 11.6236 46.5963  39
   0 -19   4 33.4986 21.2967  21
   0 -19   4-7.74955 21.2737  26
   0  19  -4-2.77158 58.6982  33
   0  19   4 13.5477 45.1794  38
   0  19   4-41.8094 36.2586  24
   0 -19   4-1.47053 27.0698  17
   0  19   4 17.2683 60.6542  22
   0 -19  -4-10.1540 35.7017  26
   0  19  -4-2.04165 48.4251  15
   0  19  -5-8.94268 44.2255  15
   0 -19   5 10.7657 19.9244  26
   0 -19  -5 16.2474 35.5345  26
   0  19   5 2.14382 44.1205  14
   0  19  -5-58.0073 33.3791  31
   0 -19   5 14.9648 15.2697  42
   0 -19   5 6.56049 18.1046  20
   0 -19  -5-18.0022 23.3581  12
   0  19   5-2.12531 38.7439  13
   0  19   5 20.2768 29.3603  24
   0 -19  -5 21.4438 45.4575  39
   0  19   5-44.2388 49.2642  38
   0  19   5-23.7002 45.2978  16
   0 -19  -5-15.1195 34.9075  21
   0  19  -5 9.86401 49.2990  33
   0 -19   5-4.95758 19.0801  21
   0  19   6 22.5984 33.1897  13
   0  19   6-2.63630 22.9453  24
   0 -19   6 9.33368 17.9889  20
   0  19  -6 14.7714 39.8754  15
   0 -19   6 9.39024 15.2986  42
   0 -19  -6 16.2269 44.2279  39
   0 -19  -6-12.5843 21.6368  12
   0  19  -6 10.5421 41.7478  33
   0 -19  -6 6.92591 34.1512  21
   0  19   6-30.1449 39.4645  14
   0 -19  -6-4.96178 33.6542  26
   0 -19   6-17.1840 26.1008  17
   0  19   6 5.67757 37.4730  16
   0  20   0 353.050 51.6898  15
   0  20   0 293.519 83.7112  31
   0 -20   0 423.918 39.3199  20
   0  20   0 186.655 43.0323  38
   0  20   0 377.274 78.3019  24
   0 -20   0 445.844 41.7186  12
   0 -20   0 345.358 44.9822  21
   0 -20   0 398.822 46.0439  26
   0  20   0 276.708 50.6585  22
   0 -20   1 388.209 40.4164  20
   0  20  -1 214.084 43.4550  38
   0  20   1 297.321 92.2465  31
   0 -20  -1 465.783 51.8241  26
   0  20   1 215.885 47.5436  38
   0  20   1 310.135 74.1472  24
   0 -20   1 525.178 43.8228  12
   0  20  -1 264.715 56.8933  15
   0 -20   1 597.368 46.9856  17
   0 -20  -1 486.619 50.7768  21
   0  20  -1 195.422 49.9533  22
   0 -20  -1 731.627 46.2738  20
   0  20   1 231.529 48.0250  15
   0 -20   1 363.122 45.2694  21
   0  20   1 252.014 58.4996  22
   0 -20  -1 401.013 42.9701  12
   0  20  -1 278.106 88.5184  24
   0 -20   1 398.373 45.5674  26
   0 -20   2 22.4298 26.6383  21
   0  20  -2-5.37178 29.0290  22
   0 -20   2-4.55989 22.0062  20
   0  20   2 13.1794 35.7574  38
   0  20   2-2.97254 49.1757  22
   0 -20  -2 18.6203 22.8514  12
   0  20   2-38.9235 51.4607  24
   0  20   2 8.42773 28.8710  15
   0 -20  -2-22.1707 25.1066  20
   0 -20   2 3.92943 24.6461  17
   0 -20   2 1.95618 27.0263  26
   0  20  -2 30.4624 43.9375  15
   0  20   3 549.628 82.8932  13
   0 -20   3 793.349 64.8035  20
   0 -20   3 785.648 67.3954  26
   0 -20  -3 904.278 75.1761  26
   0  20  -3 532.722 82.7558  31
   0 -20  -3 746.855 78.0400  39
   0 -20  -3 946.045 69.2348  12
   0  20   3 733.743 93.5051  22
   0  20   3 571.235 79.7236  38
   0 -20  -3 845.794 74.5463  21
   0 -20   3 852.537 67.6471  21
   0 -20  -3 659.296 64.8781  20
   0 -20   3 848.191 63.2835  42
   0 -20   3 1019.23 72.8790  17
   0  20   4 383.061 73.0199  22
   0  20   4 362.212 50.8395  24
   0 -20  -4 448.596 41.3724  12
   0 -20  -4 279.846 37.1208  20
   0  20   4 337.466 58.2577  38
   0 -20   4 379.816 34.0592  42
   0  20  -4 216.956 56.4213  15
   0 -20   4 387.131 36.4975  20
   0  20  -4 178.411 64.1722  33
   0 -20  -4 328.708 48.7488  21
   0 -20   4 336.376 37.5523  21
   0 -20   4 517.325 46.1538  17
   0  20   4 265.812 55.5017  13
   0 -20   4 363.247 38.2847  26
   0 -20  -4 358.137 48.9703  26
   0 -20  -4 356.593 57.2498  39
   0  20  -4 249.713 49.0814  31
   0  20   5 103.582 46.6293  38
   0 -20  -5 131.610 26.7276  12
   0  20   5 77.9301 31.8496  24
   0 -20   5 111.821 24.8142  21
   0 -20   5 107.412 22.3619  20
   0  20  -5 111.923 44.7371  15
   0 -20   5 99.6693 24.4070  26
   0  20  -5 83.1578 49.9087  33
   0  20   5 115.723 41.2488  13
   0 -20   5 89.3257 18.9397  42
   0 -20  -5 108.353 47.7132  39
   0  20  -5 52.0311 34.2743  31
   0 -20  -5 113.764 37.4075  26
   0 -20  -5 122.881 38.6265  21
   0 -21   0-0.77867 23.5472  20
   0  21   0 11.7381 27.5203  38
   0  21   0 26.8056 57.5894  24
   0 -21   0-1.14823 23.5707  12
   0 -21   0 14.1152 31.9446  26
   0 -21   0 4.23181 16.3702  42
   0  21   0 2.24707 35.8984  22
   0  21   0 30.6992 70.2971  31
   0 -21   0-23.7993 31.3441  21
   0  21   0-3.42261 35.3548  15
   0  21   1 9.54622 55.1010  24
   0 -21   1-6.22335 29.6197  21
   0  21  -1 3.43992 59.0226  31
   0  21   1-33.8397 34.5067  15
   0 -21  -1-15.5426 24.9956  20
   0  21  -1-1.83429 38.5776  15
   0 -21  -1-11.2084 34.4876  26
   0 -21   1-24.8070 24.8819  20
   0  21   1 18.6880 72.7726  31
   0  21  -1-63.2513 59.7889  24
   0 -21  -1-18.9904 34.1942  21
   0 -21  -1-27.8879 24.5707  12
   0  21   1-3.75795 30.5412  38
   0 -21   1-19.7642 30.1176  26
   0  21  -1 5.96057 32.3591  22
   0  21   1 15.1039 40.3989  22
   0  21   2-11.2043 47.1610  22
   0  21   2 19.4273 47.6142  24
   0 -21   2 7.62578 23.2954  20
   0  21   2-6.27720 35.6328  38
   0 -21   2-10.7034 27.4007  26
   0 -21   2 12.6782 26.0285  17
   0 -21   2-13.5836 28.1700  21
   0 -21  -2-5.38006 25.1157  20
   0 -21  -2 2.33006 24.1029  12
   0  21  -2-26.6513 30.9860  22
   0 -21   2-12.7886 16.7095  42
   0  21  -2-28.7409 42.1241  15
   0 -21   3-11.9424 24.7433  21
   0 -21   3 14.8130 16.7143  42
   0 -21  -3 6.85732 37.0371  26
   0 -21   3-17.4951 25.2427  26
   0 -21   3-30.6866 23.1249  20
   0 -21  -3 2.24346 23.5834  12
   0  21   3-29.3814 52.4115  22
   0 -21  -3 33.0892 42.2331  39
   0 -21  -3 5.69546 37.9865  21
   0  21   3-9.00998 38.1405  38
   0 -21  -3 16.3477 24.1676  20
   0 -21   3 1.34959 26.7224  17
   0  21  -3 32.1961 41.5365  31
   0  21   4 11.3230 35.3044  24
   0 -21  -4-11.8897 39.0473  21
   0 -21  -4 13.0451 46.9392  39
   0  21   4-18.0448 40.6106  38
   0 -21   4-76.2317 35.0215  17
   0 -21   4 575.342 39.1232  21
   0 -21   4 592.098 38.8989  26
   0  21  -4 66.9969 47.5470  31
   0 -21   4 300.859 29.0394  42
   0  21  -4 123.693 52.8088  15
   0 -21   4 402.928 32.5414  20
   0 -21  -4-10.8446 39.8907  26
   0 -22   0 970.830 66.1314  26
   0  22   0 103.359 89.2758  31
   0 -22   0 894.525 65.4770  21
   0 -22   0 492.864 65.7463  12
   0  22   0 251.354 70.5939  22
   0  22   0 673.041 82.0937  24
   0  22   0 690.296 67.2861  15
   0 -22   0 795.499 59.3790  20
   0  22  -1 16.8834 37.5965  15
   0  22  -1 5.69980 33.1594  22
   0 -22  -1 29.1981 34.6158  21
   0  22   1 28.7488 31.7359  15
   0 -22  -1 5.65867 26.0631  12
   0  22   1-16.5953 41.9501  22
   0 -22   1 32.9276 29.7896  21
   0  22  -1-12.5164 58.7125  31
   0 -22   1 70.0415 30.9278  26
   0  22   1 2.75335 48.0327  24
   0  22   1 8.80721 29.5734  38
   0 -22  -1 26.0477 33.7888  26
  -1   0   0 1.69132 0.68550  43
  -1   0   0 5.64753 1.74054   8
  -1   0   0 1.33051 1.20663  44
  -1   0   0 1.65381 1.05578   5
   1   0   0 0.32441 1.13991   4
  -1   0   0 2.28922 1.60588   6
   1   0  -1 2571.24 199.345   4
  -1   0   1 3020.80 199.358   7
  -1   0   1 2960.63 199.031  44
  -1   0  -1 3034.44 199.586   2
   1   0  -1 2827.01 199.326   1
  -1   0  -1 2703.93 199.197   5
   1   0   1 2480.96 199.482   3
  -1   0   1 3127.03 199.425   6
  -1   0  -1 3124.99 199.390   1
   1   0  -1 2955.57 199.142   9
  -1   0  -1 2769.27 199.565   9
   1   0   1 2712.88 199.188   4
  -1   0  -2-2.11239 3.83650   9
   1   0   2 0.34941 1.93088   4
  -1   0   2-0.76633 1.72550   8
   1   0  -2-0.91492 1.83293   9
  -1   0   2 2.04232 1.90485   6
   1   0  -2-0.18956 2.70162   1
  -1   0  -2 3.10391 2.48837   2
  -1   0  -2 0.68521 1.52560   5
   1   0   2 1.70538 2.13755   7
   1   0  -2 0.81821 0.99011   2
  -1   0  -2-2.89587 4.03398   1
   1   0   2-0.24201 4.75204   3
  -1   0   2 0.29053 1.76573   7
  -1   0  -3 254.948 19.4913   2
  -1   0  -3 213.147 19.8682   1
  -1   0   3 226.610 18.6950   6
  -1   0   3 245.750 19.4581   7
   1   0   3 282.602 19.1713   4
   1   0   3 252.809 21.1737   3
  -1   0   3 287.329 18.9627   8
  -1   0  -3 211.805 19.9726   9
   1   0   3 225.702 18.9163   7
   1   0  -3 248.115 19.9983   1
   1   0  -3 254.285 19.5508   9
  -1   0   3 268.293 19.5618   3
  -1   0  -4-3.16746 7.20614   1
  -1   0  -4-2.28316 7.20138   9
  -1   0  -4 0.60621 5.16170   2
  -1   0   4-2.47051 6.75764   7
  -1   0   4 8.57064 4.06464   8
   1   0   4 0.98141 8.32476   3
   1   0   4-1.74949 5.86885   7
   1   0  -4 0.39569 6.58499   1
  -1   0   4-1.07879 4.98594   3
   1   0  -4 0.86656 2.06062  10
   1   0  -4-0.71690 5.18978   9
  -1   0   4 0.71307 1.16534  44
   1   0  -5 2687.78 176.978   1
  -1   0  -5 2033.68 176.038   1
   1   0  -5 2521.10 176.485   9
  -1   0  -5 2361.76 175.379   2
  -1   0   5 2277.43 176.174   3
  -1   0   5 2414.65 177.040   7
  -1   0  -5 2589.03 177.527   9
   1   0   5 2338.71 177.081   3
   1   0   5 2405.11 176.100   7
   1   0  -6 10.6574 13.8388  29
   1   0   6 15.5483 14.9550  18
  -1   0  -6-2.91993 21.3722  29
  -1   0   6-0.91684 8.74018  20
  -1   0  -6 2.20381 13.0991  40
   1   0  -6 8.24103 11.2185   1
   1   0   6 58.6932 13.1206   3
  -1   0   6 10.6116 8.95914  35
  -1   0  -6 8.85818 12.6730  19
   1   0  -6 4.59971 11.9163  19
   1   0   6-1.14806 7.36476  42
   1   0   6 39.5451 15.6127  11
  -1   0   6 5.67129 11.6436   7
  -1   0   6 7.96226 10.3273  21
   1   0  -6 2.42332 9.20150   9
  -1   0  -6-4.25540 12.2911   1
  -1   0   6 0.60458 9.97008   3
  -1   0   6 2.52779 12.6400  11
  -1   0  -6-4.18177 13.6137   9
  -1   0   6 4.50024 12.9283  18
   1   0   6 3.58043 7.66657  20
   1   0  -6-4.34959 13.9544  25
  -1   0   6 7.99750 12.7974  13
   1   0   6 15.3841 8.43438  37
  -1   0   6-5.30451 10.2757  26
  -1   0  -6-5.28236 20.5864  25
   1   0  -7 141.609 22.3331  25
   1   0   7 141.754 14.5673  42
  -1   0  -7 99.2762 19.0825   1
   1   0  -7 121.657 19.6341  19
   1   0  -7 74.1327 16.9316   4
   1   0   7 108.100 20.0782  11
  -1   0  -7 118.422 19.2875  40
   1   0   7 120.287 18.5910   3
  -1   0  -7 115.139 19.2384  19
  -1   0   7 149.094 17.0315  35
   1   0  -7 132.026 19.5799   1
   1   0  -7 106.663 17.4261   9
  -1   0   7 127.121 18.0001  37
  -1   0  -7 120.587 20.0119   9
  -1   0   7 111.027 20.0428  11
  -1   0   7 110.485 18.1865   3
   1   0  -7 157.143 21.5107  29
   1   0   7 124.918 20.9544  18
  -1   0  -7 110.518 26.6096  25
  -1   0   7 115.522 14.2874  42
  -1   0  -7 140.069 26.9239  29
  -1   0   7 128.851 17.2880  21
  -1   0   7 118.479 16.0082  20
   1   0   7 114.656 14.1166  20
  -1   0   7 123.648 17.4046  26
  -1   0   7 120.016 20.1049  13
  -1   0   7 136.017 21.0741  18
  -1   0  -8 5.71938 27.9917  29
   1   0  -8 3.61131 15.0162   4
  -1   0  -8-10.3733 26.6119  25
   1   0  -8-2.32779 17.8996  19
   1   0  -8-1.70325 21.1143  29
  -1   0  -8 9.73030 19.5636   1
  -1   0  -8 4.76560 18.3226  40
   1   0   8 7.60603 18.2965  18
  -1   0   8-4.42707 13.6905  21
  -1   0   8 3.31122 15.4080  37
   1   0  -8-16.8873 20.4824   1
  -1   0  -8-7.90229 19.0577  19
   1   0   8 13.3683 15.4293   3
   1   0   8 2.18885 10.2807  20
  -1   0   8-6.02606 10.0681  42
  -1   0   8-0.82914 13.3862   3
  -1   0   8-9.55456 18.8134  18
   1   0  -8-4.28835 13.6434   9
  -1   0   8-11.2738 18.1590  11
   1   0   8 0.93496 18.5894  11
  -1   0   8 4.68438 11.4169  20
  -1   0  -8 10.3939 18.0500   9
  -1   0   8 1.47258 11.8624  35
  -1   0   8-2.21124 13.2823  26
   1   0   8-5.50040 9.79520  42
   1   0  -8 0.92834 22.7298  25
  -1   0   9 866.732 65.7696  35
  -1   0   9 875.971 65.8652  20
  -1   0  -9 791.653 67.5018  19
   1   0  -9 835.902 71.0251  25
  -1   0  -9 897.806 69.0011  40
   1   0  -9 903.102 69.3833  19
  -1   0   9 852.917 64.3816  42
   1   0   9 863.817 64.2360  42
  -1   0  -9 677.217 71.2197  25
  -1   0   9 690.388 67.8473  11
   1   0  -9 824.012 70.0387  29
   1   0   9 827.435 69.0588  18
   1   0   9 888.305 64.9312  37
  -1   0   9 704.322 67.9464  18
  -1   0   9 944.844 67.8876  37
   1   0   9 918.827 64.6152  20
   1   0   9 735.718 68.0941  11
  -1   0  -9 788.362 72.4270  29
   1   0  10-1.16706 20.8894  18
  -1   0  10 8.30411 22.4241  11
  -1   0 -10 16.0372 32.1212  29
  -1   0 -10 1.99092 23.5652  40
  -1   0  10 32.5751 23.6897  18
  -1   0 -10-27.3624 31.7287  25
   1   0  10-6.88993 20.9679  11
   1   0 -10-19.8694 30.0418  29
  -1   0  10-0.74335 12.5871  42
  -1   0 -10-10.2400 23.2426  19
   1   0  10-2.91973 13.0653  20
  -1   0  10 4.01938 17.3971  37
   1   0  10 10.4310 13.7401  37
   1   0 -10 3.10392 21.4565  40
   1   0 -10 3.71453 30.0956  25
  -1   0  10-5.46311 15.0331  20
  -1   0  10 7.94074 14.2742  35
   1   0 -10-7.34842 25.0667  19
  -1   0 -11 22.8578 33.7556  25
  -1   0  11 49.8224 24.2416  37
  -1   0  11 7.54851 24.8251  18
  -1   0  11-8.00511 16.7887  35
  -1   0  11 25.9950 24.7660  11
   1   0 -11-9.41593 33.8531  29
  -1   0 -11-32.0728 35.7653  29
  -1   0 -11 33.7773 26.0774  19
   1   0  11 40.2269 22.9587  18
  -1   0  11 44.6293 18.9231  20
  -1   0 -11 1.03381 27.0685  40
   1   0  11 37.2099 15.1362  37
   1   0  11 22.7663 22.4309  11
   1   0 -11 6.41210 32.1988  25
   1   0  11 37.8995 15.1472  20
   1   0 -11 72.4941 28.0852  19
   1   0 -11 17.1097 24.2139  40
  -1   0  11 14.7845 15.8282  42
  -1   0 -12-21.6872 35.9227  29
   1   0 -12 18.4113 25.1574  40
   1   0 -12-19.0862 36.1690  25
   1   0  12-2.19251 13.1041  42
   1   0  12-12.7278 24.3565  11
  -1   0 -12 37.2578 34.9162  25
  -1   0  12 3.56875 27.9965  11
  -1   0 -12-39.2773 28.2905  19
   1   0  12 18.3098 15.7084  37
  -1   0 -12-8.73838 26.5211  40
  -1   0  12 11.2533 18.3618  20
  -1   0  12-14.5082 31.6498  18
  -1   0  12 3.03775 15.8291  42
   1   0  12-8.59153 16.5819  20
   1   0  12-14.1214 25.3121  18
   1   0 -12-20.7363 37.9648  29
   1   0 -12-4.31641 29.5401  19
  -1   0  13 78.3026 25.7458  18
   1   0  13 88.4554 26.4575  11
  -1   0  13 115.008 20.7162  20
   1   0  13 121.577 27.1784  18
  -1   0  13 73.9287 25.9521  11
   1   0 -13 90.5121 30.7355  19
  -1  -1   0 101.167 8.29018  44
   1   1   0 96.2865 8.01504   3
  -1   1   0 122.681 8.57826   5
  -1   1   0 111.556 8.44699   8
  -1  -1   0 123.769 8.49414  43
  -1   1   0 126.447 8.17356  43
   1  -1   0 107.417 8.03393   4
   1  -1   0 114.755 8.07350   3
  -1   1   0 122.187 8.37233   6
  -1   1  -1 1533.95 104.448  43
  -1  -1   1 1708.11 104.648   6
  -1  -1   1 1351.86 104.402  44
  -1  -1  -1 1431.71 104.833   9
  -1   1   1 1564.79 104.916   8
   1  -1   1 1309.41 104.976   7
  -1  -1  -1 1535.24 104.920  44
  -1   1  -1 1699.98 104.856   2
   1  -1   1 1505.33 104.177   4
   1   1  -1 1708.41 104.612   1
  -1  -1   1 1650.96 104.561   8
  -1   1  -1 1620.07 104.714   5
   1   1   1 1299.02 104.780   3
  -1  -1   1 1505.61 104.726   7
   1  -1  -1 1407.46 104.620   1
   1   1   1 1451.99 104.773   4
  -1   1   1 1633.83 104.857   6
  -1  -1   1 1685.79 104.188  43
   1   1  -1 1552.67 104.454   9
   1  -1  -1 1574.92 104.389   9
   1   1  -1 1375.20 104.499   4
  -1  -1  -1 1238.02 104.404   1
   1  -1   1 1349.12 104.790   3
  -1  -1  -1 1638.93 105.338   2
   1  -1  -1 1248.79 104.188   2
  -1   1  -2 17080.9 1143.81   5
  -1  -1  -2 16545.5 1144.86   2
   1  -1  -2 18462.0 1144.45   9
  -1  -1  -2 15139.4 1144.41   1
   1   1  -2 15976.8 1144.46   1
  -1   1   2 18042.4 1144.56   8
  -1  -1   2 18285.7 1143.86   5
  -1  -1   2 18280.0 1143.98   6
  -1   1   2 17652.6 1144.46   6
  -1  -1  -2 17550.7 1145.12   9
  -1  -1   2 13796.9 1143.57  44
   1  -1  -2 16240.4 1144.57   1
   1  -1  -2 14801.5 1143.61   2
   1   1   2 17466.2 1144.34   4
   1   1   2 12701.5 1143.84   7
   1  -1   2 16154.6 1144.88   3
  -1   1  -2 17782.8 1144.51   2
  -1   1  -2 15850.1 1144.00  43
   1  -1   2 19774.5 1143.92   4
   1   1   2 15273.3 1144.93   3
  -1  -1   2 17119.3 1143.81   8
  -1   1   2 15993.4 1143.93   7
   1   1  -2 17739.4 1144.38   9
  -1  -1   3 1634.72 100.678   3
  -1  -1   3 1140.90 98.9680  44
   1  -1  -3 1248.28 99.2709  10
   1   1  -3 1475.88 100.832   1
   1   1  -3 1189.81 100.077   4
  -1   1  -3 1521.00 100.419   2
  -1  -1   3 1350.97 101.240   7
   1  -1  -3 1551.86 100.708   9
  -1  -1   3 1780.51 99.7065   8
  -1   1  -3 1114.52 100.710   9
   1  -1  -3 1581.99 99.6832   2
   1  -1  -3 1409.60 100.834   1
  -1   1   3 1627.47 100.486   8
  -1   1   3 1600.23 100.283   6
  -1   1   3 1618.41 100.764   3
   1   1   3 1409.02 101.799   3
   1   1  -3 1526.39 100.506   9
   1   1   3 1285.46 99.6210   7
  -1  -1  -3 1403.95 101.272   9
  -1  -1   3 1515.06 99.6426   6
   1  -1   3 1531.64 101.629   3
  -1  -1  -3 1375.63 100.632   2
  -1  -1  -3 1262.03 100.507   1
  -1   1   3 1380.76 99.7566   7
   1   1   3 1673.26 100.480   4
   1  -1   3 1367.22 100.315   7
   1   1  -4 11.7749 5.16823   9
  -1   1   4 11.8159 4.80525   6
  -1  -1   4 7.93252 3.68332   8
   1  -1  -4 8.43210 2.83618  10
   1  -1  -4 4.02639 6.13097   1
  -1  -1  -4 0.46427 7.84447   9
   1   1   4 1.56688 8.61437   3
   1  -1  -4 11.7870 5.46889   9
   1   1  -4 3.68332 6.04008   4
  -1  -1  -4 3.24191 5.26488   2
  -1   1  -4 10.2905 5.26864   2
  -1   1  -4 8.08978 6.68962   9
  -1  -1   4 15.1700 2.64228  44
   1   1   4 3.44757 5.74922   7
  -1  -1   4 12.8117 5.22138   3
  -1   1   4 9.33522 4.71449   7
  -1  -1  -4 12.4611 6.76843   1
   1  -1   4 8.43007 8.15003   3
  -1   1   4 9.81842 4.60438   8
  -1   1   4 4.13353 5.60507   3
   1  -1   4 14.3602 6.47826   7
  -1  -1   4 5.44325 8.42072   7
   1   1  -4 14.9007 7.29433   1
   1  -1  -5 248.239 21.6105   1
   1   1  -5 248.106 20.5892   9
  -1  -1  -5 218.602 21.0451   1
  -1   1  -5 257.557 22.3312   9
  -1   1   5 229.630 21.1699   3
  -1  -1  -5 230.777 20.1123   2
   1   1   5 260.783 21.7812   7
  -1  -1   5 211.063 23.3800   7
  -1  -1   5 226.513 20.3252   3
  -1   1   5 253.835 20.2450   7
   1  -1   5 227.074 20.9936   7
   1   1  -5 202.318 21.6021   1
  -1   1  -5 226.240 19.8903   2
  -1   1   5 259.435 20.3537   8
  -1  -1  -5 276.321 23.1345   9
   1   1  -5 164.293 19.9071   4
   1  -1  -5 246.163 20.8584   9
  -1   1  -5 173.358 22.0661   1
   1  -1   5 219.822 22.1441   3
   1   1   5 223.184 22.5515   3
   1  -1  -5 227.827 17.2716  10
   1  -1   6 5360.21 388.413  20
  -1   1   6 5955.20 390.664  21
  -1  -1   6 4747.85 389.757   3
  -1  -1  -6 6438.01 391.247  40
  -1  -1  -6 4900.88 389.238  19
  -1  -1   6 5557.02 388.572  42
  -1   1  -6 4834.01 390.266  34
  -1   1   6 6297.37 389.773   8
  -1  -1   6 5754.91 391.432  13
   1  -1  -6 6932.73 392.122  25
   1  -1   6 5567.40 391.205  11
   1   1   6 4378.74 390.290   3
   1   1  -6 5633.28 390.166  19
  -1  -1   6 5376.13 389.279  20
  -1   1   6 5911.41 390.650  26
  -1   1   6 5396.68 390.218  37
  -1   1   6 5201.50 390.925  11
  -1   1  -6 5612.47 391.452   9
  -1  -1   6 5570.32 390.885  18
  -1  -1   6 6797.85 390.746  35
   1  -1   6 5692.60 391.409  18
   1  -1  -6 6069.69 390.163  19
  -1  -1  -6 5940.00 392.384  25
   1   1   6 5921.65 389.145  37
   1  -1   6 5310.03 390.685   3
  -1  -1  -6 5696.02 392.510  29
  -1   1   6 5105.58 388.421  42
   1   1   6 5974.85 388.907  20
   1   1  -6 7134.84 392.480  25
   1   1   6 4760.95 390.908  11
   1   1  -6 5418.65 390.960   1
   1   1   6 6929.86 390.523  35
  -1  -1   6 5408.48 389.630  21
  -1   1   6 6300.61 392.936  13
   1   1  -6 6360.54 390.909  34
  -1   1  -6 4796.38 389.390  19
   1  -1  -6 5588.68 390.660   9
  -1   1  -6 4426.60 389.794   1
  -1   1   6 5117.70 389.026  20
  -1   1   6 5275.67 391.231  18
   1   1   6 6129.24 389.193  42
  -1  -1  -6 4829.79 389.878   1
  -1   1   6 4613.66 389.986   3
   1  -1  -6 7347.59 392.287  29
   1   1   6 4925.72 391.189  18
  -1  -1   6 5479.70 392.036   7
   1  -1   6 5651.18 390.504   7
   1   1  -6 5697.07 390.349  29
  -1   1  -6 5791.18 393.074  25
   1   1  -6 4014.71 388.772   4
  -1  -1   6 5530.56 390.700  11
   1  -1   6 5846.65 388.857  42
  -1  -1   6 5349.75 389.592  26
   1  -1  -6 5944.97 391.197   1
  -1   1   6 6924.74 391.335  35
   1   1  -6 5034.66 390.142   9
  -1  -1  -6 5851.19 391.664   9
  -1   1   7 249.823 25.7973  37
   1   1   7 262.829 23.2929  42
   1  -1  -7 316.429 29.8340  29
  -1   1  -7 283.066 33.8944  29
   1  -1   7 259.849 28.4441  18
  -1  -1   7 235.446 27.0021  18
  -1   1   7 242.464 22.9187  42
   1   1   7 263.160 23.1055  20
  -1   1  -7 240.831 27.7277   9
   1   1   7 247.699 28.8291  11
   1   1  -7 244.779 30.0448  25
   1   1  -7 246.585 27.7065   1
  -1   1  -7 271.518 27.2608  40
   1  -1   7 283.146 28.7909  11
  -1   1   7 187.253 25.8476   3
   1   1  -7 268.533 26.1432   9
   1   1   7 568.737 36.2448  36
   1   1  -7 287.686 27.9713  29
   1  -1  -7 295.287 28.0741   1
  -1  -1  -7 256.780 27.7208   1
   1   1  -7 201.106 24.8767   4
   1   1   7 241.178 28.8583  18
  -1   1   7 291.821 25.3415  35
  -1   1  -7 217.227 33.3026  25
  -1  -1   7 238.872 27.0804  11
  -1  -1  -7 259.857 27.8781  40
  -1   1   7 226.997 27.9610  11
   1   1   7 279.423 23.4635  37
  -1  -1   7 208.178 24.3096   3
   1  -1  -7 244.452 26.1099   9
   1  -1  -7 266.283 29.5850  25
  -1  -1  -7 259.928 26.1645  19
   1   1  -7 261.639 27.6362  19
  -1  -1  -7 233.751 32.1835  25
  -1  -1  -7 257.442 27.6711   9
  -1  -1   7 281.238 23.3839  42
   1  -1  -7 276.333 26.7200  19
  -1   1  -7 223.093 28.1425   1
  -1   1   7 219.080 28.2471  18
  -1  -1   7 230.666 24.7893  21
   1  -1   7 512.834 32.3124  36
   1   1   7 244.727 27.4363   3
  -1  -1  -7 258.452 34.2699  29
  -1   1   7 239.491 24.2713  20
  -1  -1   7 240.979 24.3807  20
  -1   1   7 309.975 29.4261  13
  -1  -1   7 289.340 26.5529  37
  -1   1  -7 218.700 26.9826  19
  -1   1   7 250.193 25.4770  26
  -1  -1   7 240.375 24.8728  26
   1  -1   7 261.112 23.0299  20
  -1   1   7 252.452 25.4629  21
   1  -1   7 243.588 26.5270   3
   1   1  -7 223.978 27.8211  34
  -1  -1   7 290.481 25.0105  35
   1  -1   7 265.489 23.0573  42
  -1   1   8 13.4749 10.2045  42
   1  -1   8 4.33360 10.7148  42
  -1   1   8 15.8535 14.4563  26
   1   1   8 11.6335 19.7304  11
   1  -1  -8 13.9491 24.1973  25
   1   1   8 25.9021 21.7893  36
   1  -1  -8 21.8793 18.5980  19
  -1  -1  -8-2.95347 28.4579  29
   1   1  -8 17.1572 15.6003   9
  -1   1   8-11.9339 19.8103  11
   1   1  -8-2.43692 20.2735  29
  -1   1   8-2.05587 17.9044  13
  -1  -1   8 20.2850 14.0577  26
  -1   1   8 23.6285 13.8411  35
   1   1   8 13.6016 9.45248  42
  -1  -1   8 17.4314 14.9677   3
  -1   1  -8 22.1914 28.0620  25
  -1  -1  -8-0.79846 19.9110   1
   1   1   8 21.6709 11.4339  20
   1  -1   8-18.6761 17.5995   3
  -1  -1   8 17.6146 12.2043  20
   1  -1  -8 19.6652 21.6961  29
  -1  -1   8 8.17119 10.0794  42
  -1   1  -8 25.8274 29.2747  29
   1   1  -8 15.0301 20.1189  19
  -1   1   8 16.1820 19.2726  18
  -1   1   8 5.02445 15.1789  37
   1  -1   8-15.7155 21.5297  18
  -1   1  -8-16.8199 19.3887   9
   1   1   8 16.7589 19.8780  18
  -1   1  -8 4.09851 19.2069   1
  -1   1   8-4.38604 16.0819   3
   1   1  -8 13.0063 23.5647  25
  -1  -1   8 15.4350 14.1289  37
  -1  -1   8 9.87369 17.9800  11
  -1  -1   8 0.71209 11.7505  35
  -1  -1  -8-3.06924 27.4601  25
   1  -1   8 16.9645 11.4063  37
  -1  -1  -8-8.53810 19.2746  19
  -1  -1   8 7.97533 13.6360  21
   1  -1  -8-3.43955 15.6883   9
  -1   1  -8 6.09610 19.3971  40
  -1  -1   8 9.12892 18.5316  18
   1  -1  -8 10.7258 15.5971   4
  -1   1  -8-12.6558 19.4522  19
   1   1   8 11.2554 16.3530   3
  -1  -1  -8 27.4542 20.8449   9
  -1   1   8 15.0455 12.4015  20
  -1  -1  -8 13.2339 18.7769  40
   1  -1  -8 6.13940 19.3562   1
   1  -1   8 3.71400 11.8628  20
   1   1  -8 26.6852 22.2565   1
   1  -1   8 1.81812 19.8820  11
  -1   1   8 12.0918 14.2993  21
  -1   1   9 34.0150 22.0434  11
  -1   1  -9 45.8128 32.9546  29
  -1   1   9 33.7944 14.1876  35
   1   1   9 31.6597 20.3897  11
   1  -1  -9 33.8137 27.9871  25
  -1  -1   9 32.8043 13.6513  20
  -1  -1  -9 19.0958 31.8022  29
   1  -1   9 20.3263 11.6451  20
  -1  -1   9 36.2683 20.7280  11
   1   1  -9 18.5571 27.1401  25
  -1  -1  -9 47.1959 30.2524  25
   1  -1   9 18.8022 10.5245  42
  -1   1   9 35.5113 18.4087  37
  -1   1   9 10.2561 13.3382  20
   1  -1   9 17.4197 12.5010  37
   1  -1   9-4.21012 20.4724  18
  -1  -1   9 22.5455 13.9664  35
  -1   1  -9 32.1264 21.3835  40
   1  -1  -9 25.0961 26.2754  29
  -1   1   9 24.2137 21.7940  18
  -1  -1  -9 18.0495 22.3549  40
   1   1  -9 22.9755 21.5670  19
   1  -1   9 18.6413 19.9133  11
  -1   1   9 21.4671 12.3844  42
   1   1  -9 11.3011 24.2186  29
  -1  -1   9 31.0056 16.1580  37
  -1   1  -9-12.8697 28.8249  25
  -1   1  -9 45.9009 23.1947  19
  -1  -1   9 12.6466 20.1423  18
  -1  -1  -9 28.6505 21.1881  19
  -1  -1   9 41.4055 12.7250  42
   1   1   9 29.8259 11.5704  42
   1  -1  -9 22.6233 21.1545  19
   1   1   9 19.8100 11.4736  20
   1   1   9 26.6276 20.0638  18
   1  -1  10 1511.40 109.022  20
   1   1 -10 1412.05 111.589  40
   1   1 -10 1469.47 115.606  25
  -1   1  10 1600.49 110.738  20
  -1  -1  10 1586.42 110.366  35
  -1  -1  10 1578.93 110.676  20
  -1   1  10 1320.15 113.290  18
  -1   1 -10 1340.09 115.212  29
   1  -1  10 1641.50 113.920  18
   1  -1 -10 1449.92 112.317  40
  -1  -1 -10 1525.95 113.281  40
   1  -1 -10 1422.61 115.399  25
   1  -1  10 1695.48 109.774  37
   1  -1 -10 1671.49 113.868  19
  -1  -1 -10 1244.86 114.257  29
   1   1  10 1442.69 113.063  11
   1   1  10 1519.49 110.272  37
  -1  -1  10 1377.76 113.239  18
  -1  -1  10 1318.01 112.346  11
   1   1 -10 1530.22 114.505  29
   1   1  10 1507.39 109.686  20
  -1   1  10 1603.52 109.384  42
  -1  -1 -10 1326.83 111.749  19
  -1  -1  10 1789.85 112.936  37
  -1   1  10 1542.98 110.520  35
  -1  -1 -10 1346.09 115.365  25
  -1   1  10 1665.33 113.027  37
   1   1  10 1390.98 112.984  18
  -1   1  10 1225.15 112.662  11
   1   1 -10 1666.76 113.956  19
   1  -1 -10 1610.61 115.628  29
  -1  -1  10 1571.75 108.958  42
  -1   1 -10 1152.98 111.952  19
   1  -1  10 1617.36 113.523  11
  -1   1 -10 1375.66 116.382  25
  -1   1 -10 612.816 111.626  40
   1  -1  11 74.0865 15.7355  20
   1   1  11 55.6611 17.4345  37
  -1   1  11 59.0094 18.1874  20
  -1  -1 -11 83.0736 36.6541  25
  -1  -1  11 66.0194 18.9666  20
  -1  -1  11 37.2817 24.9722  11
   1   1  11 38.9907 24.7122  11
  -1   1  11 48.0817 27.7398  18
   1  -1 -11 37.3827 27.3553  19
  -1  -1 -11 87.2335 26.7134  19
   1   1 -11 69.7982 32.6485  29
   1  -1 -11 40.6985 32.1381  25
   1   1 -11 48.9204 33.3178  25
  -1  -1  11 85.8248 16.5962  42
  -1   1  11 51.9044 16.8031  42
   1   1  11 42.1449 25.3933  18
  -1  -1 -11 24.9554 35.0198  29
  -1  -1 -11 43.0067 27.1357  40
   1  -1 -11 41.6177 35.0426  29
  -1  -1  11 77.0913 20.4197  37
  -1   1  11 45.5395 17.9453  35
   1  -1  11 67.1833 25.4712  18
   1  -1 -11 53.5783 26.3840  40
   1   1  11 72.5261 16.3753  20
  -1   1  11 35.8017 27.2057  11
   1   1 -11 43.7922 24.7859  40
  -1   1 -11 53.7546 33.9892  25
  -1   1  11 61.0881 22.6867  37
  -1   1 -11 35.7942 26.3490  19
  -1  -1  11 72.1160 25.6249  18
  -1   1 -11 39.3799 35.0085  29
  -1   1 -11-1.97503 25.4766  40
   1  -1  11 53.9935 16.5675  37
   1  -1  11 66.0375 24.8963  11
   1   1 -11 72.6282 28.6080  19
   1  -1  12 18.0162 15.0744  37
   1  -1 -12 30.5936 28.7739  19
   1  -1 -12-10.0361 34.8358  25
  -1  -1 -12 40.9122 36.2575  29
  -1   1  12-1.23773 27.4533  18
   1  -1  12 3.42521 24.1803  11
  -1   1  12-0.76045 15.8101  42
   1  -1  12-2.89866 13.1889  42
   1   1 -12 2.56224 33.6432  25
   1  -1  12-20.4937 15.7804  20
   1   1 -12 3.98735 25.2117  40
  -1   1  12-7.97436 21.3899  37
   1   1  12 2.33864 23.9102  11
  -1   1  12-2.43487 25.1194  11
  -1  -1 -12-2.05568 27.4972  40
  -1  -1  12 19.2393 16.9989  20
   1   1  12 3.36618 15.7127  37
  -1  -1  12 5.27801 15.0531  42
  -1   1  12-3.70378 17.5823  20
   1   1 -12-49.5227 37.0386  29
  -1  -1 -12 0.95480 26.2505  19
  -1   1  12 0.85014 16.0208  35
  -1   1 -12 11.6695 26.6590  19
  -1   1 -12-22.5993 34.9652  25
   1  -1 -12 68.1509 36.4547  29
  -1  -1  12-3.54022 25.7375  18
   1  -1 -12-8.35080 26.0624  40
  -1  -1  12-1.16109 26.0642  11
  -1  -1 -12 27.7491 34.6186  25
   1   1 -12 4.29227 28.5543  19
   1  -1  12-23.2243 25.2103  18
   1   1  12-3.56769 23.9674  18
  -1   1 -12-1.84866 24.8590  40
   1   1  12-3.75233 14.2287  42
  -1   1  13 14.5862 24.1416  11
   1   1  13 6.05991 23.4284  11
   1   1  13 29.7694 23.8111  18
   1  -1 -13 25.8940 27.4244  19
  -1   1  13 18.0019 24.4115  18
  -1   2   0 2469.05 153.948   6
   1   2   0 2115.20 153.926   4
   1  -2   0 2172.19 153.442   3
  -1  -2   0 2069.44 153.826  44
  -1  -2   0 2370.93 153.730   7
  -1   2   0 2108.53 153.970   8
   1  -2   0 2085.50 154.307   7
  -1   2  -1 704.770 46.2496  43
  -1   2  -1 698.659 46.2488   6
   1   2  -1 686.094 46.3255   9
  -1  -2  -1 512.819 46.1042   1
   1  -2  -1 572.055 46.0526  44
   1   2  -1 818.720 46.4572   1
  -1  -2  -1 674.566 46.6607  44
  -1  -2   1 772.160 45.9586  43
  -1  -2   1 549.532 46.0734   2
   1  -2  -1 762.899 46.2480   9
  -1  -2  -1 732.036 47.6302   2
   1   2  -1 594.112 46.3366   4
  -1   2  -1 715.334 46.7079   8
  -1   2  -1 572.356 46.4500   9
  -1   2   1 691.789 47.0019   8
   1  -2  -1 638.752 46.5088   1
   1  -2   1 611.817 47.0694   7
   1   2   1 637.193 46.8370   4
  -1  -2  -1 685.229 46.7486   9
  -1  -2   1 676.573 46.7831   7
   1  -2   1 587.761 46.5438   3
  -1   2   1 731.562 46.9319   6
   1  -2  -1 607.435 46.2207   2
   1   2   2 7064.94 630.060   7
  -1  -2   2 9997.55 630.281   5
  -1  -2  -2 10285.5 631.652   9
   1  -2   2 9474.45 631.367   3
  -1  -2  -2 9062.82 631.618   2
  -1  -2   2 9604.74 629.939   8
  -1   2   2 10069.7 631.123   6
  -1  -2  -2 9413.83 630.908  44
   1  -2  -2 9573.97 629.656  44
   1   2   2 9571.54 630.988   4
   1   2  -2 9753.93 630.755   9
   1  -2  -2 8994.37 630.996   1
   1   2  -2 8794.29 630.476   4
   1  -2  -2 8544.32 630.190   2
   1  -2   2 9464.73 629.915  10
   1  -2   2 8441.52 631.080   7
  -1   2  -2 9719.72 630.886   2
  -1  -2  -2 7309.47 630.509   1
  -1   2  -2 7703.02 630.967   9
   1   2  -2 10477.3 631.017   1
   1  -2  -2 9957.03 630.868   9
  -1  -2   2 9274.59 631.606   7
   1  -2  -2 8582.55 630.417  10
  -1  -2   2 7634.55 630.152  44
  -1   2  -2 8993.01 630.137  43
   1   2  -3 1840.66 123.641   9
  -1  -2   3 2058.21 123.750   3
  -1   2  -3 1789.97 123.432   2
   1  -2  -3 1879.93 122.892   2
  -1  -2   3 1920.08 122.186   8
   1   2   3 1492.17 122.393   7
  -1   2   3 1852.21 123.618   6
  -1   2  -3 1658.40 124.177   9
  -1   2   3 1929.10 123.932   8
  -1  -2   3 1540.23 124.634   7
  -1  -2  -3 1594.89 123.875   2
   1   2  -3 1891.93 124.049   1
   1   2   3 1980.55 123.787   4
   1  -2   3 1815.35 123.930   7
   1  -2  -3 1767.89 123.925   1
   1  -2   3 1941.44 124.748   3
  -1  -2   3 1501.43 122.392  44
  -1  -2   3 2003.35 122.316   5
  -1   2  -3 1501.87 122.424  43
   1   2  -3 1510.30 122.974   4
   1  -2  -3 1833.16 123.831   9
   1  -2  -3 1742.22 122.662  10
  -1  -2  -3 1468.27 123.431   1
  -1  -2  -3 1918.24 124.744   9
  -1   2   4 213.573 15.9141   7
  -1   2   4 227.509 17.6982   8
  -1  -2   4 231.822 18.1413   3
   1  -2   4 204.925 18.1371   7
  -1  -2   4 160.538 20.3652   7
  -1  -2   4 174.444 15.4539  44
   1   2   4 200.758 16.9819   7
  -1  -2  -4 186.589 17.5645   2
   1   2  -4 193.802 17.4400   9
   1  -2  -4 172.116 15.5121  10
  -1  -2   4 267.647 15.7257   8
   1  -2  -4 231.991 18.3302   9
   1  -2   4 235.744 19.6948   3
  -1  -2  -4 225.678 19.2961   9
  -1  -2  -4 197.727 17.8037   1
   1   2  -4 196.698 18.6560   1
  -1   2  -4 215.001 17.2531   2
   1  -2  -4 215.413 18.2128   1
  -1   2   4 216.297 17.2217   6
   1   2  -4 157.849 16.9292   4
   1   2  -5 6.07723 6.43122   9
   1   2  -5 1.52090 10.5675   1
   1  -2   5 6.58308 9.27003   3
  -1  -2  -5-1.61999 8.07106   2
  -1  -2   5 10.5921 7.82452   3
   1  -2  -5 6.25421 8.16556   1
  -1  -2  -5 7.73596 8.93916   9
  -1   2   5 8.27831 4.90675   7
   1   2  -5 2.65220 7.48058   4
  -1   2   5 15.7782 7.52662   8
  -1  -2   5 12.9476 12.7853   7
   1  -2  -5 12.9853 4.33777  10
   1  -2   5 12.0843 9.48024   7
  -1  -2  -5 5.60445 8.04581   1
   1  -2  -5 0.99545 7.90255   9
  -1  -2   6 124.635 17.5648   3
   1  -2  -6 174.522 18.5372  19
   1   2  -6 152.891 20.6599   1
  -1  -2  -6 128.932 17.8184   1
   1  -2   6 159.047 15.8312  44
   1   2  -6 117.906 17.0153   4
  -1  -2  -6 190.184 21.4143   9
  -1   2   6 191.331 22.8382  13
   1   2   6 172.187 16.1872  20
   1  -2  -6 171.834 19.7935   9
   1  -2   6 176.150 16.1312  20
  -1  -2   6 175.349 22.1096   7
  -1   2   6 152.735 15.8068  42
  -1  -2   6 156.391 19.2441  11
   1  -2  -6 199.100 22.7797  29
  -1   2  -6 145.547 20.0415  41
   1  -2  -6 220.668 23.0190  25
   1   2  -6 145.126 17.1085   9
   1   2   6 179.297 17.7317  35
  -1  -2   6 172.615 17.7114  20
  -1  -2  -6 133.050 17.8014  19
  -1   2   6 150.100 16.7748  20
   1   2   6 175.522 16.2545  42
  -1   2   6 178.817 17.3543   8
  -1   2   6 222.509 19.1837  35
   1  -2   6 164.014 20.6595  11
  -1   2  -6 159.967 23.4688  34
   1   2   6 143.977 16.1859  37
  -1  -2   6 199.131 17.3781  35
  -1  -2   6 177.899 19.7070  18
  -1  -2   6 165.508 16.0479  42
   1  -2   6 169.713 16.3940  42
  -1  -2   6 158.892 17.8307  21
  -1   2   6 185.550 19.5555  21
  -1   2   6 188.820 19.8270  16
   1  -2   6 175.670 20.9936  18
   1   2  -6 163.348 21.3392  34
  -1   2   6 192.166 19.9676  14
   1  -2   6 149.188 19.1790   7
  -1   2   6 125.654 18.0605  37
  -1  -2   6 165.746 17.8153  26
   1   2  -6 185.106 19.8446  29
  -1  -2  -6 184.331 21.9698  40
   1   2   6 297.519 27.0612  36
  -1  -2  -6 199.584 25.4776  25
  -1   2   6 175.183 19.2817  26
   1   2  -6 166.505 20.0537  19
   1  -2  -6 186.968 19.2607   1
   1  -2   6 158.622 19.1096   3
   1   2  -7 608.598 49.5954  19
   1  -2  -7 706.645 52.3651  25
   1  -2   7 592.158 49.9957  18
  -1  -2   7 720.271 48.0127  35
  -1  -2   7 516.483 50.0474   7
   1  -2   7 626.890 50.1562  11
  -1  -2   7 499.616 47.4396   3
  -1  -2  -7 591.692 54.2203  29
  -1  -2  -7 612.426 50.1893   9
  -1   2   7 620.991 48.7938  21
  -1   2  -7 658.353 48.9452  40
   1  -2   7 615.133 46.1083  42
  -1   2   7 618.377 51.6283  13
   1   2   7 885.657 51.3657   8
   1  -2  -7 653.511 48.9679  19
   1   2  -7 665.919 49.8817  29
  -1  -2  -7 620.620 50.1290  28
  -1  -2   7 524.246 47.0221  21
  -1   2  -7 628.728 55.2634  25
  -1  -2   7 589.531 49.4280  18
  -1   2  -7 556.765 49.5177  41
  -1  -2   7 636.977 47.5012  20
   1   2  -7 471.576 47.4520   9
  -1   2   7 664.613 48.6995  35
   1   2   7 555.374 46.1415  37
   1   2  -7 547.627 49.9875   1
   1  -2   7 582.647 45.8807  20
   1   2   7 645.722 48.1101  35
   1   2  -7 590.297 50.0596  34
  -1  -2   7 754.952 49.4051  37
  -1   2  -7 485.573 50.2206  34
   1  -2   7 601.105 48.5419   3
  -1  -2  -7 502.664 48.4348   1
   1  -2  -7 624.083 49.8759   1
  -1   2   7 638.703 49.0277  26
  -1   2   7 542.002 45.9200  42
   1   2   7 633.054 46.5558  20
  -1  -2   7 589.203 46.0763  42
   1   2   7 1181.93 59.2359  36
  -1   2   7 530.452 48.7028  37
  -1   2   7 527.970 46.6818  20
   1  -2   7 659.254 46.8299  37
  -1  -2  -7 528.578 47.5207  19
   1   2   7 635.774 46.6650  42
   1   2  -7 455.566 46.5092   4
   1  -2  -7 593.488 49.0064   9
  -1  -2   7 533.817 47.1379  26
  -1  -2  -7 636.464 50.4636  40
  -1  -2  -7 627.527 53.7050  25
  -1  -2   7 595.932 49.3656  11
  -1   2  -7 692.723 54.9475  29
  -1   2   8 26.2733 10.9675  42
  -1  -2  -8 1.58779 16.4697   1
  -1  -2   8 29.4003 12.3263  35
  -1   2  -8 56.3154 28.2897  25
  -1  -2   8 31.7307 15.4228  37
  -1   2  -8 27.2439 30.7115  29
  -1   2   8 34.1068 15.3162  26
   1   2  -8 38.2374 23.1245  25
   1  -2   8 28.9619 18.4897  18
  -1  -2  -8 29.6274 29.7648  29
   1  -2  -8 14.5955 16.9552  19
  -1  -2   8 17.3393 17.1803  11
   1  -2   8 35.5887 11.7953  37
   1   2   8 58.8166 22.6810  36
  -1  -2  -8-3.54014 22.4456  28
   1   2   8 23.8740 11.3357  20
  -1   2   8 2.82172 12.8687  20
   1  -2   8 24.6400 14.8237   3
  -1  -2  -8 26.9653 17.3627  19
   1   2   8 19.0712 9.93420  42
  -1   2  -8 15.3903 21.7838  34
   1   2  -8 19.4733 21.9735   1
  -1   2  -8 5.81161 20.9071   1
   1  -2  -8 35.4156 24.3027  25
  -1   2  -8 18.9792 17.9224  40
  -1  -2   8 37.8826 11.2402  42
   1   2   8 18.9533 10.5317  37
   1   2  -8 0.85873 13.8250   9
   1  -2  -8 22.3429 14.7331   9
  -1   2   8 33.6486 13.6313  35
  -1  -2   8 20.6403 13.8032  26
  -1   2   8 29.4991 16.7003  37
   1   2  -8 38.7893 21.0223  34
  -1  -2   8 26.7759 13.1995  20
   1   2  -8 25.0173 21.6082  19
  -1  -2  -8 26.8993 21.2953  40
  -1  -2   8 10.5811 17.3005  18
  -1  -2   8 20.6534 13.4890  21
   1  -2   8 33.3457 11.0308  42
   1  -2  -8 18.5410 19.2444   1
   1  -2   8 42.6568 11.6491  20
  -1  -2  -8 43.4765 27.1848  25
  -1   2   8 29.8248 19.3663  13
   1   2   8 11.9600 13.0835  35
   1   2  -8 25.6177 20.6171  29
   1  -2   8 35.5992 18.0656  11
  -1   2   8 20.9549 14.7033  21
   1  -2  -8 62.9113 25.8906  29
  -1  -2  -8 15.1443 18.1885   9
   1  -2  -9-3.63936 19.6159  19
  -1   2  -9 2.62869 22.3114  19
   1  -2  -9-1.09324 26.0548  29
   1  -2   9 4.13480 19.4203  18
   1  -2  -9-1.65737 20.9411  28
   1  -2   9-9.96926 11.7419  42
  -1   2   9 12.0400 18.2307  37
   1   2  -9-6.56068 23.2985  19
   1   2  -9-1.82548 24.7126  29
  -1  -2  -9-8.87380 23.3858  40
  -1   2  -9-5.81218 20.1447  40
  -1  -2   9-1.56648 13.1107  35
   1   2   9-4.71691 10.6499  42
  -1  -2   9-6.35552 11.9769  42
  -1  -2  -9-16.3861 32.1790  29
   1  -2  -9-6.53604 27.8768  25
  -1  -2  -9-2.28540 27.6469  25
  -1   2   9-13.0185 14.6958  35
   1  -2   9-4.06830 18.9901  11
  -1   2   9-4.86302 12.6978  20
   1  -2   9 5.96861 12.4593  37
  -1  -2   9 7.14870 19.2746  18
  -1   2  -9 17.7637 28.9431  25
   1  -2   9 3.71510 11.9505  20
  -1  -2  -9 7.34253 20.8604  19
   1  -2  -9-0.99716 19.2736  40
   1   2  -9 4.37176 26.8326  25
  -1   2  -9-10.0725 29.5594  29
  -1   2   9 8.80576 11.8751  42
  -1  -2   9 14.0576 18.7481  11
  -1  -2   9 7.11282 13.4830  20
  -1  -2   9 6.86875 15.6775  37
   1   2   9 13.8171 12.5942  20
  -1   2 -10 0.90815 22.9764  40
   1  -2 -10 1.22549 30.6180  25
  -1  -2 -10 24.3732 22.8393  19
  -1   2  10 33.9207 14.9841  20
  -1  -2 -10 26.0935 25.5618  40
  -1   2 -10 34.0633 30.8233  25
   1   2 -10 4.91007 20.4727  40
   1   2 -10 16.1201 29.0898  25
   1  -2  10 6.73101 21.8066  11
  -1  -2  10 29.5663 15.0101  20
  -1  -2  10 21.1434 16.4870  37
  -1  -2  10 41.6504 13.4755  42
   1  -2 -10 15.5727 29.7207  29
   1  -2  10 6.37163 12.9545  20
   1   2 -10 16.1176 28.5600  29
   1   2 -10 4.16041 25.0493  19
  -1  -2  10-8.96116 22.5728  11
   1   2  10-3.79821 13.3176  20
  -1  -2 -10 5.15751 32.0998  25
  -1   2  10 23.8255 13.9869  42
   1  -2 -10 22.1103 24.5669  28
   1  -2 -10 22.6609 23.1495  19
   1  -2  10 20.5434 22.2795  18
  -1  -2  10 3.41542 21.9375  18
  -1   2 -10 3.83384 25.1948  19
  -1   2  10 8.33051 15.8310  35
  -1   2  10 15.7255 20.5073  37
   1  -2  10 18.8076 13.3289  37
  -1  -2 -10 20.0191 33.1083  29
   1   2 -11 154.010 32.0172  19
  -1   2 -11 77.6566 36.4616  25
   1  -2  11 164.674 20.8391  37
  -1   2  11 161.377 21.8284  42
   1  -2 -11 119.221 35.7080  25
   1   2 -11 128.425 36.5145  29
  -1  -2 -11 131.048 31.3676  40
  -1  -2  11 165.412 22.7187  20
   1  -2  11 145.300 29.0928  18
   1   2 -11 23.3116 27.4524  40
  -1   2 -11-0.93627 28.2597  40
  -1  -2  11 110.713 28.7367  18
  -1  -2 -11 148.649 36.2978  25
  -1  -2 -11 113.796 28.4301  19
  -1   2  11 160.189 22.9700  20
  -1  -2  11 87.8465 28.1681  11
  -1   2 -11 121.073 29.4643  19
   1  -2  11 131.208 27.4238  11
   1  -2 -11 145.690 29.8671  19
   1   2 -11 69.4987 36.7505  25
  -1   2  11 142.701 25.8641  37
   1  -2  11 144.069 19.5819  20
  -1  -2 -11 118.668 39.8403  29
   1  -2 -11 144.387 39.0095  29
  -1  -2  11 168.232 20.2510  42
   1   2  11 111.967 20.5545  37
   1  -2  12 201.766 21.7251  42
  -1  -2  12 161.856 30.8998  11
   1  -2  12 184.131 31.3356  11
  -1  -2 -12 131.382 38.4277  25
   1   2 -12 149.941 39.7838  25
  -1  -2  12 161.054 30.6668  18
  -1  -2  12 202.397 25.4620  20
  -1  -2  12 222.747 23.5969  42
  -1   2 -12 131.893 39.6471  25
  -1   2  12 230.410 29.6289  37
   1  -2  12 196.657 22.8013  20
  -1  -2 -12 182.233 33.0783  40
  -1  -2 -12 216.763 32.8620  19
   1  -2 -12 168.439 32.6670  40
  -1   2  12 172.317 24.5292  35
   1  -2  12 189.133 22.6267  37
   1  -2 -12 121.487 37.5901  25
   1  -2  12 185.021 30.9701  18
  -1   2  12 159.394 25.0737  20
   1   2  12 234.468 26.8096  37
   1   2  12 167.914 22.4887  42
  -1  -2 -12 192.306 41.7542  29
  -1   2  12 204.895 24.6922  42
   1  -2 -12 191.936 41.6951  29
   1   2 -12 171.501 30.9303  40
   1  -2 -12 213.607 33.7013  19
   1   2 -12 237.187 35.8082  19
  -1   2 -12 149.726 31.9107  19
  -1  -3   0 15591.9 1062.54   7
   1  -3   0 17275.6 1062.81  10
  -1   3   0 16003.8 1063.01   8
  -1  -3   0 14448.8 1062.79   2
   1   3   0 15403.3 1063.02   4
   1  -3   0 16041.6 1062.18   3
  -1  -3   0 16141.0 1062.82  44
   1  -3   0 14409.2 1062.69  44
   1   3   0 13812.5 1062.10   3
   1  -3   0 15411.2 1063.28   7
  -1   3  -1 15326.0 835.462   6
  -1   3   1 12162.9 836.042   8
   1  -3  -1 12019.0 835.165  44
  -1   3  -1 13019.9 835.552   1
   1  -3  -1 12174.9 835.918   7
   1  -3   1 12068.5 835.498   3
  -1   3  -1 10927.5 835.284   9
  -1  -3  -1 10959.9 836.079   2
   1   3  -1 14938.7 835.377   1
  -1  -3  -1 13395.1 835.726   9
   1  -3   1 12217.1 836.230   7
   1  -3  -1 11480.7 835.531  10
   1  -3  -1 11498.1 835.023   9
   1   3   1 12328.2 836.053   4
  -1  -3   1 9593.88 834.966   2
  -1  -3  -1 10646.8 835.146   1
  -1   3   1 13624.7 836.076   6
  -1  -3   1 13063.4 836.057   7
  -1   3  -1 12382.0 835.568   8
   1  -3  -1 11410.0 835.333   2
   1  -3   1 12681.7 835.331  10
   1   3   1 10286.1 835.476   3
  -1  -3  -1 12597.2 835.662  44
   1  -3  -2 1529.13 92.8041  44
  -1  -3   2 1056.49 92.6041   2
   1   3  -2 1622.38 94.0254   1
   1  -3  -2 1316.69 93.6834   9
   1   3   2 1390.63 95.0713   3
   1  -3  -2 1355.24 93.3556   2
   1  -3   2 1569.59 94.5635   3
  -1  -3  -2 1463.32 94.5276   9
   1   3  -2 1395.87 93.6602   9
  -1  -3   2 1194.80 93.3320  44
  -1  -3  -2 1163.84 93.4524   1
  -1   3  -2 1429.06 94.1250   1
  -1   3  -2 1178.06 93.9095   9
  -1  -3  -2 1304.78 94.5417   2
   1  -3   2 1372.67 92.9151  10
  -1   3  -2 1380.51 93.0595  43
   1  -3   2 1310.02 94.3405   7
  -1  -3   2 1525.16 95.1153   7
   1  -3  -2 1380.07 94.0311   1
   1   3   2 1401.29 94.2162   4
   1   3  -2 1113.33 93.1979   4
  -1   3   2 1443.12 94.4680   8
  -1   3   2 1463.95 94.2901   6
  -1  -3  -2 1527.91 93.8762  44
   1  -3   3 9584.85 569.928   3
   1  -3  -3 9368.78 568.291   2
   1   3  -3 9113.11 569.066   1
  -1  -3  -3 9386.20 568.710  44
  -1  -3  -3 6523.30 568.365   1
  -1   3  -3 6745.25 566.985   4
  -1  -3   3 9988.31 567.587   5
   1   3   3 8826.63 570.973   3
   1  -3  -3 7175.75 567.842  10
  -1   3   3 8939.33 569.158   6
  -1  -3   3 9894.89 568.900   3
  -1   3   3 8981.96 569.475   8
  -1  -3  -3 9491.20 570.135   9
  -1   3   3 9568.59 569.090   3
   1  -3  -3 8549.27 569.090   9
   1   3  -3 8268.13 568.103   4
   1   3  -3 9060.87 568.948   9
   1   3   3 9249.33 569.241   4
   1   3   3 7014.55 567.232   7
  -1  -3   3 7487.90 567.850  44
  -1   3  -3 8164.16 569.137   1
   1  -3  -3 9162.76 569.314   1
  -1   3  -3 8332.99 569.424   9
  -1  -3  -3 8217.05 569.369   2
  -1   3   4 7535.34 495.847   6
   1   3   4 6761.15 497.835   3
  -1  -3   4 7519.67 495.640   3
  -1  -3   4 6073.27 494.134  44
  -1  -3  -4 6566.10 495.530   1
   1  -3   4 7172.06 496.281   7
  -1  -3   4 8293.92 493.563   5
   1  -3   4 7787.52 496.829   3
   1  -3  -4 7853.03 496.377   9
  -1   3  -4 7279.22 496.564   9
  -1  -3  -4 6795.86 495.812   2
  -1   3  -4 5471.39 493.651   4
   1  -3  -4 7608.50 496.405   1
   1   3  -4 7227.22 495.794   9
   1   3  -4 7706.42 496.180   1
  -1  -3  -4 7566.74 497.181   9
  -1  -3   4 6841.92 497.699   7
   1   3  -4 6604.38 494.758   4
   1   3   4 7567.94 495.945   4
   1  -3  -4 6487.93 494.216  10
  -1   3   4 8131.89 496.683   8
  -1   3   4 7314.29 496.339   3
   1   3   4 8536.52 495.559   7
  -1   3  -5 5424.68 360.987   9
  -1   3   5 4659.87 360.405   3
   1  -3  -5 5538.07 360.764   9
  -1  -3  -5 5206.54 359.897   1
   1  -3   5 4960.65 359.150  44
  -1  -3  -5 5156.60 359.638   2
   1   3  -5 5120.52 360.202   1
  -1   3   5 6055.56 360.884   8
   1   3  -5 4590.52 358.533   4
   1   3  -5 5018.71 359.831   9
  -1  -3  -5 5366.01 361.368   9
   1  -3   5 5525.66 360.881   3
   1   3   5 4442.57 361.438   3
   1  -3  -5 5883.25 360.933   1
  -1  -3   5 4576.88 361.689   7
   1  -3   5 5232.40 360.499   7
   1  -3  -5 5092.45 357.683  10
  -1  -3   5 5048.51 359.563   3
  -1   3   6 175.967 17.9692  42
  -1   3   6 216.808 21.7744  21
  -1  -3   6 211.543 23.9142   7
  -1  -3   6 209.030 21.2657  18
   1   3   6 374.986 29.3377  36
   1  -3   6 194.421 20.8188   3
  -1   3   6 230.933 20.8523   8
  -1   3   6 204.552 24.2098  11
  -1   3   6 171.885 21.9585   3
  -1   3  -6 166.915 25.7897  34
   1  -3  -6 238.124 24.6475  29
  -1  -3   6 171.205 17.9451  42
  -1   3   6 231.101 21.7880  26
  -1  -3   6 218.844 21.1070  11
  -1   3   6 178.686 24.0568  18
  -1  -3   6 160.535 19.1573  21
  -1  -3   6 193.335 19.5789   3
   1   3   6 197.979 25.8541  11
   1   3   6 242.962 20.8638  35
  -1   3   6 247.945 24.9442  13
   1   3  -6 189.214 21.9405  19
   1  -3  -6 187.643 21.6186   1
   1   3  -6 268.396 24.1655  34
   1   3   6 221.322 26.4131  18
   1   3   6 175.588 23.9832   3
   1   3  -6 189.461 20.9512  41
  -1   3  -6 213.805 32.4551  25
   1   3  -6 189.572 20.0334   9
   1   3   6 223.815 18.7021  42
  -1  -3   6 147.194 19.1818  26
   1   3  -6 171.274 21.8935   1
   1   3  -6 167.450 18.5833   4
  -1  -3   6 232.548 19.1820  35
   1   3   6 175.199 17.8047  37
  -1  -3  -6 229.902 22.6693   9
   1  -3   6 167.489 18.1371  20
  -1  -3  -6 187.129 20.5494   1
   1  -3   6 189.216 22.4193  11
   1  -3   6 199.913 18.0437  44
   1  -3   6 176.683 17.7501  42
   1  -3  -6 226.442 20.9495  19
  -1  -3  -6 188.442 26.0783  25
   1  -3   6 180.615 21.1463   7
  -1   3   6 167.607 18.7539  20
  -1  -3  -6 232.443 25.0185  28
  -1   3  -6 159.939 21.6508  41
   1   3   6 193.509 18.6721  20
  -1   3   6 224.116 21.0147  35
   1   3  -6 262.000 24.6828  25
  -1   3  -6 199.176 22.4819   9
  -1   3   6 196.706 21.6855  16
   1  -3   6 188.237 22.6743  18
   1  -3   6 229.303 18.7052  37
  -1  -3  -6 210.655 28.9794  29
  -1   3   6 192.327 20.6756  37
  -1  -3  -6 164.110 19.1556  19
   1  -3  -6 249.582 24.8144  25
   1  -3  -6 190.279 21.6025   9
  -1   3   6 204.101 21.5666  14
  -1  -3   7 2697.22 193.365  42
  -1  -3   7 2351.82 194.037  26
   1   3   7 2250.59 196.071   3
   1  -3   7 2736.94 195.523   7
  -1  -3   7 2734.07 194.473  20
  -1  -3   7 3090.64 195.044  35
  -1   3  -7 2619.79 196.355   9
  -1  -3  -7 2990.53 196.617  28
   1  -3  -7 3085.60 196.976   1
  -1   3   7 3074.61 196.260  35
   1  -3   7 2933.09 196.779  11
   1   3   7 2469.91 197.310  11
  -1   3   7 2968.30 196.253  21
  -1   3  -7 2882.97 195.188  40
  -1   3   7 2920.17 198.684  13
  -1   3   7 1854.39 195.033   3
   1  -3  -7 3499.67 198.937  29
  -1   3   7 2421.80 193.291  42
  -1   3  -7 2432.09 196.165  41
  -1   3  -7 2905.30 200.342  25
  -1  -3   7 2340.64 194.041  21
  -1   3   7 3055.78 196.448  26
   1   3   7 2976.17 194.438  20
   1  -3  -7 2749.92 196.099   9
  -1  -3  -7 2858.24 198.111  25
  -1  -3  -7 2780.53 196.982   9
   1   3  -7 2422.96 195.549  34
  -1   3  -7 3279.64 200.045  29
   1  -3   7 2647.07 195.420   3
   1   3   7 2473.33 197.603  18
  -1   3  -7 2353.38 196.229  34
  -1  -3   7 2679.03 195.838  18
  -1   3   7 2614.46 196.064  16
   1  -3   7 2964.87 193.923  37
  -1  -3   7 3461.25 196.475  37
  -1  -3   7 2743.82 195.738  11
   1   3   7 4144.79 200.231   8
   1  -3  -7 3367.65 198.330  25
  -1  -3   7 2344.19 196.232   7
  -1  -3  -7 2631.02 195.254   1
   1   3  -7 2347.61 194.974   9
  -1   3   7 2549.57 195.585  37
  -1   3   7 2228.26 196.776  11
   1   3   7 3196.73 195.824  35
   1   3  -7 2634.92 195.459  19
   1   3   7 4601.23 204.485  36
   1  -3   7 2521.31 193.044  20
  -1  -3  -7 2554.37 194.293  19
   1  -3   7 3080.78 197.244  18
  -1   3   7 2639.19 196.117  14
   1   3  -7 3348.06 198.539  25
   1   3   7 2712.65 193.910  42
   1   3   7 2637.83 194.052  37
   1   3  -7 2394.81 195.549   1
   1   3  -7 3199.82 196.070  29
  -1   3   7 2228.13 196.905  18
  -1   3   7 2453.24 194.216  20
   1  -3   7 2755.62 193.355  42
  -1  -3   7 2379.67 194.443   3
   1  -3  -7 3146.11 195.895  19
   1  -3   8 1698.31 120.860  11
  -1  -3   8 1714.39 118.668  20
   1   3   8 1799.39 119.614  35
   1  -3   8 1571.80 116.872  20
  -1   3   8 1702.04 119.798  26
   1  -3   8 1585.86 116.967  42
  -1  -3  -8 1652.03 121.754  40
   1   3   8 1471.21 121.794  11
  -1  -3   8 1497.91 118.254  21
   1  -3  -8 1923.65 120.614  19
  -1   3  -8 1175.36 119.637  34
   1  -3   8 1598.25 119.045   3
   1   3  -8 1330.98 118.798   9
  -1  -3   8 1926.82 119.642  37
  -1   3  -8 1368.09 120.115  41
   1   3   8 1619.70 117.935  37
   1   3  -8 1799.83 120.744  29
   1   3  -8 1357.53 119.658   1
   1   3   8 1675.83 117.795  42
   1  -3  -8 1679.44 122.070  25
  -1   3   8 1311.91 122.076  18
  -1  -3   8 1614.71 120.374  18
   1  -3  -8 1863.82 123.706  29
  -1  -3   8 1689.75 117.340  42
  -1  -3  -8 1560.30 122.820  25
   1  -3   8 1771.69 121.491  18
  -1  -3   8 1487.12 118.197  26
   1  -3   8 1753.45 117.776  37
   1   3   8 2539.09 128.234  36
   1   3  -8 1558.33 120.590  34
  -1   3   8 1657.11 119.603  21
  -1   3   8 1611.14 122.423  13
  -1  -3  -8 1570.40 118.875  19
   1  -3  -8 1829.98 121.822  40
  -1   3   8 1546.16 120.265  37
  -1   3   8 1382.75 116.793  42
  -1  -3  -8 1685.02 119.923   1
   1   3  -8 1478.53 119.733  19
  -1  -3   8 1679.17 118.321  35
  -1  -3  -8 1716.75 120.993  28
   1  -3  -8 1789.36 120.979   1
   1   3   8 1461.30 122.075  18
  -1   3   8 1352.17 122.015  11
  -1   3   8 1838.83 120.255  35
  -1  -3  -8 1735.69 121.656   9
  -1   3  -8 1613.11 119.073  40
  -1   3  -8 1581.20 120.576   9
   1   3   8 1327.17 119.908   3
   1   3  -8 1685.86 122.445  25
   1   3   8 1803.16 118.261  20
  -1   3   8 1566.15 118.345  20
  -1  -3   8 1531.00 119.732  11
  -1  -3  -9 1380.24 111.560  25
   1   3   9 1514.81 105.761  20
  -1   3   9 1459.49 107.483  35
  -1   3   9 1394.34 109.921  13
  -1  -3   9 1671.00 107.396  37
  -1  -3  -9 1411.48 112.846  29
   1   3   9 1296.56 109.709  18
   1  -3   9 1467.04 104.861  20
   1  -3  -9 1669.21 108.924  19
   1   3   9 1320.52 109.854  11
   1  -3  -9 1520.59 111.860  25
  -1   3   9 1451.12 109.505  37
  -1   3  -9 1185.50 108.839  34
  -1   3   9 1420.89 106.452  20
   1  -3   9 1324.62 104.382  42
   1  -3   9 1466.69 109.305  11
   1   3  -9 1486.69 109.284  29
  -1  -3  -9 1478.64 109.766  40
  -1  -3   9 1520.81 106.732  20
   1  -3   9 1606.94 110.135  18
   1  -3  -9 1486.76 109.245  40
  -1   3   9 1334.98 105.137  42
  -1  -3   9 1453.37 109.137  18
  -1   3  -9 1424.98 107.436  40
  -1  -3   9 1493.80 105.002  42
  -1   3   9 1177.38 110.174  11
  -1  -3  -9 1276.02 106.530  19
   1   3  -9 1304.35 108.614  34
  -1  -3  -9 1329.63 108.941  28
   1  -3   9 1504.49 105.454  37
   1   3  -9 1439.28 109.309  19
   1   3   9 1409.43 105.618  37
  -1  -3   9 1466.19 108.726  11
   1  -3  -9 1494.96 108.933  28
  -1   3   9 1101.90 109.978  18
   1   3   9 1405.00 105.200  42
   1   3   9 1561.88 107.489  35
  -1  -3 -10 22.9385 32.9168  25
  -1  -3  10 26.7345 13.6062  42
  -1  -3  10 17.7884 22.6080  18
   1  -3 -10 24.8472 30.7857  29
   1  -3  10-0.70856 13.1332  20
   1  -3 -10 21.8123 31.1511  25
  -1  -3 -10 27.3764 34.7769  29
  -1   3  10 12.5586 29.1605  18
  -1   3  10 28.2057 15.3369  20
  -1   3  10-6.86533 28.5879  11
  -1   3  10 30.3256 16.4198  35
   1   3  10-1.27612 24.2803  18
   1  -3 -10 45.5438 24.0819  40
  -1  -3  10 14.0035 14.9271  20
   1   3  10 1.25448 24.0484  11
   1  -3  10 31.9652 13.4335  37
  -1  -3  10 40.4697 22.7348  11
   1  -3 -10 39.6916 26.4893  28
   1  -3  10 50.8900 23.5085  11
   1   3  10 26.6874 13.7113  42
   1   3 -10 4.22033 27.1331  19
   1  -3  10 46.1468 23.3625  18
  -1  -3 -10 21.2907 26.3650  40
   1  -3 -10 31.1648 22.1043  19
  -1   3  10 32.4142 14.8007  42
   1   3 -10 2.86490 20.4533  40
  -1  -3 -10 7.20080 21.6900  19
  -1   3  10 15.9523 21.8850  37
   1  -3  11 760.129 59.3068  18
  -1  -3  11 744.706 52.6093  42
   1  -3 -11 610.256 64.2306  29
   1   3 -11 656.494 60.3750  19
  -1   3  11 477.115 59.0348  11
   1  -3 -11 526.517 60.9204  25
   1  -3  11 689.275 52.3380  37
   1   3  11 586.071 58.3235  11
  -1   3  11 655.256 54.1928  35
  -1  -3  11 746.722 54.7475  20
  -1  -3  11 716.252 58.6814  11
  -1  -3 -11 581.470 64.8155  29
  -1  -3 -11 726.094 60.0420  40
  -1   3  11 632.690 52.8167  42
  -1  -3 -11 560.897 62.5515  25
   1  -3  11 771.300 52.7360  20
  -1  -3 -11 648.854 57.0574  19
  -1   3  11 586.250 53.7114  20
   1  -3 -11 627.167 58.4798  40
  -1   3  11 561.524 60.3867  18
  -1   3  11 721.656 58.5481  37
   1  -3 -11 731.656 58.9453  19
  -1  -3  11 656.009 58.7216  18
   1  -3  11 677.443 58.1244  11
   1   3  11 634.582 59.1412  18
  -1  -3  12 354.839 35.0285  20
   1   3  12 316.144 32.8936  42
  -1  -3 -12 318.141 41.3400  40
   1  -3  12 371.469 32.9788  37
   1  -3  12 354.678 40.1994  18
  -1   3  12 313.076 33.5711  42
  -1   3  12 382.763 36.2374  20
  -1   3  12 287.981 41.4135  18
  -1  -3 -12 324.142 47.0741  25
   1   3  12 367.029 35.2815  37
   1   3  12 343.153 41.1783  18
   1  -3 -12 278.976 47.4519  29
   1  -3 -12 295.181 45.7047  25
  -1   3 -12 304.129 40.2874  19
  -1  -3  12 376.769 32.9750  42
   1  -3  12 378.726 32.1816  42
   1  -3  12 381.715 40.1354  11
   1  -3  12 365.944 32.6963  20
   1  -3 -12 412.663 42.2966  19
   1   3 -12 362.594 39.6037  40
  -1   3  12 405.194 38.5816  37
  -1  -3 -12 284.875 48.5897  29
   1   3 -12 399.035 43.6643  19
  -1  -3 -12 357.891 40.0202  19
  -1  -3  12 350.950 39.9081  11
  -1  -3  12 334.336 40.8376  18
  -1   3  12 280.831 40.8322  11
  -1   3  12 355.606 35.2835  35
   1   3  12 388.149 41.2675  11
  -1   4   0 14533.2 813.002   6
  -1  -4   0 13390.0 812.584   7
   1   4   0 10611.0 811.826   3
  -1  -4   0 10866.4 812.536   2
  -1   4   0 11555.6 812.914   8
   1  -4   0 10551.7 811.831   3
   1  -4   0 12258.0 812.719  44
  -1  -4   0 12589.7 812.787  44
   1  -4   0 12434.6 812.682  10
   1  -4   0 12686.4 813.202   7
  -1   4  -1 3.66817 2.13610   8
  -1  -4   1 5.40070 1.73459   2
   1  -4  -1 1.21199 2.51968  10
   1   4  -1 6.39769 1.78547   9
  -1   4  -1 4.54510 1.86034   6
   1   4  -1 5.60505 5.53641   4
  -1   4   1 3.81762 2.61522   6
   1   4  -1 6.64122 2.52285   1
   1   4   1-1.56837 5.33178   3
   1  -4  -1 3.34757 1.82110   2
  -1  -4  -1 5.79523 1.45775   7
  -1  -4  -1 2.54858 1.95668  44
  -1   4  -1 3.08929 2.78241   1
   1  -4  -1 2.68625 1.80869  44
   1  -4   1 4.61717 2.42195  10
  -1  -4  -1-0.44609 2.52291   2
   1  -4   1 3.52942 3.93795   3
  -1   4   1 4.20263 2.73826   8
  -1  -4   1 5.82328 2.95051   7
   1  -4   1 6.38158 4.12439   7
   1   4   1 2.70566 5.58358   4
   1  -4   1 6.97744 2.86460  44
  -1   4  -1 11.2664 2.40097   9
   1  -4  -1 5.67658 2.90466   7
  -1  -4  -2 75.1037 8.28622   2
  -1   4   2 77.8938 8.14703   6
  -1   4  -2 69.4579 7.10403   8
   1   4  -2 88.7291 7.40451   9
  -1  -4  -2 73.8487 7.20924   1
   1   4   2 82.1675 11.0945   3
   1   4   2 85.3331 9.07079   4
   1  -4   2 90.9246 8.82759   3
   1  -4  -2 90.1244 6.58030  44
   1   4  -2 68.7024 7.53700   4
  -1  -4  -2 91.7569 8.63331   9
   1  -4  -2 93.6310 7.82350   1
  -1  -4   2 76.5452 7.27176  44
   1  -4   2 74.7282 6.87335  10
  -1   4  -2 90.6604 8.44079   1
  -1  -4   2 87.4043 9.06940   7
  -1   4  -2 87.2251 6.39276   6
  -1  -4  -2 80.7961 7.47600  44
   1  -4  -2 80.8691 7.12137   2
  -1  -4   2 67.4223 6.40105   2
   1  -4   2 87.0183 8.88667   7
  -1   4   2 86.1599 8.63371   8
  -1   4  -2 89.0977 8.40314   9
   1   4  -2 101.213 8.19065   1
   1  -4   2 66.1730 7.94750  44
  -1  -4   3 362.254 28.7904  44
  -1  -4   3 531.573 28.9227   5
   1  -4  -3 412.708 30.3498   9
   1  -4   3 412.834 30.0106  44
  -1   4  -3 437.225 30.4542   1
   1  -4   3 462.632 31.1237   7
   1   4   3 449.897 30.4338   4
  -1  -4  -3 488.074 29.5823  44
   1  -4  -3 398.129 29.0301  10
   1   4  -3 483.018 30.3222   1
   1   4   3 304.995 27.4881   7
  -1  -4  -3 372.997 29.3651   1
  -1  -4  -3 485.020 31.3710   9
   1  -4  -3 441.752 30.0387   1
   1   4   3 437.671 33.9367   3
  -1   4   3 435.446 30.4342   6
   1   4  -3 358.582 28.7621   4
   1  -4   3 429.295 30.8413   3
  -1  -4   3 419.017 31.5903   7
   1  -4  -3 438.715 29.1068   2
  -1  -4  -3 437.564 30.7695   2
  -1  -4   3 366.914 27.8942   2
  -1   4  -3 393.372 30.3125   9
  -1  -4  -4 1956.24 125.897   9
   1   4   4 1784.88 124.339   4
   1   4  -4 1798.03 124.233   1
  -1   4   4 1786.19 124.378   6
  -1  -4  -4 1558.28 123.664   1
  -1   4   4 1872.43 125.468   8
  -1  -4   4 1510.39 122.636  44
  -1   4   4 1735.17 124.515   3
   1  -4  -4 1733.08 122.795  10
   1  -4   4 1701.33 123.969  44
  -1   4  -4 1772.22 124.773   9
   1   4   4 1597.83 126.789   3
  -1  -4   4 1952.96 123.946   3
   1  -4  -4 1946.97 124.672   1
  -1  -4  -4 1754.28 124.413   2
  -1  -4   4 1648.46 125.844   7
   1  -4  -4 1949.42 123.531   2
   1  -4   4 1879.04 125.294   7
  -1   4  -4 1607.08 124.439   1
   1   4  -4 1554.56 122.678   4
   1  -4   4 1935.89 125.040   3
   1  -4   5 271.912 23.1812  44
   1  -4  -5 290.272 24.6444   1
   1  -4   5 276.288 24.7471   3
   1   4   5 266.336 25.9090   6
  -1   4   5 290.647 24.0037   6
  -1  -4   5 283.555 27.0213   7
   1   4  -5 266.438 22.1174   4
  -1   4  -5 319.620 25.7242   9
  -1   4  -5 223.627 25.0814   1
  -1   4   5 308.242 25.4427   8
  -1  -4  -5 271.410 26.3750   9
   1   4   5 258.722 28.1189   3
  -1  -4   5 308.638 23.5211   3
  -1  -4   5 239.687 21.2364  44
  -1  -4  -5 283.674 23.9259   2
  -1  -4  -5 292.474 23.9359   1
   1   4  -5 265.742 25.2746   1
  -1   4   5 242.598 24.9248   3
   1  -4   5 290.053 25.6077   7
   1   4   6 52.9658 20.0835   8
   1   4   6 31.0695 9.22887  37
  -1  -4  -6 34.6471 16.0262   9
   1   4  -6 36.1007 17.1855  34
   1  -4  -6 58.9984 14.0851   1
  -1  -4  -6 39.4263 17.5339  40
  -1  -4   6 25.5018 10.8939   3
   1  -4   6 35.8230 9.12236  44
   1  -4   6 40.5124 9.28884  37
  -1   4   6 39.2315 15.8079   3
   1   4  -6 53.9014 17.9674  25
   1  -4   6 30.2173 13.4378   7
   1   4   6 17.1105 8.61849  42
  -1  -4   6 35.1139 10.8201  21
  -1   4   6 26.6590 10.1371  20
   1  -4   6 31.8364 14.7479  18
  -1   4   6 35.3455 13.4765  26
   1   4   6 52.0500 20.7912  11
  -1   4   6 35.0798 12.4196  35
  -1  -4  -6 39.3906 19.5350  28
   1   4   6 15.0725 15.4516   3
   1  -4   6 17.6310 12.4324   3
  -1   4   6 32.8512 18.2721  11
   1   4   6 57.1118 18.7192  36
  -1  -4   6 27.7874 9.16242  42
   1   4  -6 34.9519 9.50749   4
   1   4   6 26.0439 20.2898  18
  -1   4  -6 43.0752 29.6048  25
   1  -4  -6 33.0272 17.1054  29
  -1  -4   6 20.2324 12.5871  11
  -1   4   6 30.5878 9.44022  42
  -1   4  -6 33.5413 12.8503   9
  -1   4  -6 20.4507 15.3433  41
   1  -4   6 18.7495 14.3051  11
   1  -4   6 20.7331 8.51538  42
  -1  -4  -6 20.9684 10.9675   1
  -1   4  -6 17.7299 20.9434  34
  -1  -4   6 47.4410 15.1503   7
  -1   4   6 44.5755 13.2755   8
   1   4  -6 30.3648 15.5205   1
  -1   4   6 22.4843 11.5746  37
  -1   4  -6 26.7059 15.0620  23
   1   4  -6 51.3835 15.0967  19
   1  -4  -6 41.9435 12.0971  19
   1  -4   6 22.0987 9.24183  20
  -1   4   6 24.0250 12.4611  16
  -1   4   6 27.3156 12.4397  14
  -1   4   6 26.5603 18.2344  18
  -1   4   6 42.0769 13.6743  21
  -1  -4   6 38.9513 11.2963  26
   1  -4  -6 55.6809 17.7829  25
  -1  -4  -6 35.3995 10.9573  19
  -1   4   6 40.7793 15.2692  13
  -1  -4  -6 55.8129 11.1802   2
   1   4   6 37.2833 12.3307  35
  -1   4  -6 15.6437 14.7496   1
   1   4  -6 21.9865 12.1837  41
  -1  -4  -6 26.9587 22.0968  29
  -1  -4   6 28.8791 8.67682  35
  -1  -4   6 22.2552 12.5485  18
  -1   4   7 136.279 20.4385  14
  -1   4   7 137.895 18.6908  35
   1  -4   7 186.044 17.4106  37
   1   4  -7 152.609 22.6067  19
   1  -4   7 148.349 19.6917   3
   1  -4   7 146.644 20.6609   7
  -1  -4   7 139.492 21.0290   7
   1   4   7 147.370 19.1530  35
   1  -4  -7 171.974 20.1939   1
  -1   4   7 134.601 20.7951  16
  -1  -4   7 130.947 18.2531  21
  -1   4   7 110.992 15.8967  42
   1   4   7 144.212 26.3947  11
   1  -4   7 170.568 22.1162  18
  -1   4   7 168.365 23.9497  13
   1   4   7 309.389 27.4390   8
  -1  -4   7 157.494 17.3382  35
   1  -4  -7 248.011 28.2825  29
  -1  -4   7 133.741 16.3035  42
   1   4   7 144.538 26.4586  18
  -1  -4  -7 149.978 18.8312   1
  -1   4   7 115.065 25.9597  11
   1   4  -7 118.149 19.7422  41
  -1   4   7 99.6701 25.4186  18
  -1  -4  -7 157.635 24.4752  40
  -1  -4  -7 162.825 31.9492  29
  -1   4  -7 150.876 34.2454  25
   1  -4   7 122.454 14.8231  27
  -1   4   7 101.781 22.2533   3
   1   4   7 127.432 22.1885   3
   1  -4  -7 190.131 20.0699  19
  -1   4  -7 125.993 26.2523  34
   1   4  -7 125.302 22.7257   1
   1   4  -7 158.493 24.5264  34
   1   4   7 145.943 17.6110  20
  -1   4   7 185.115 20.0889   8
  -1  -4   7 152.444 20.4637  18
   1  -4   7 148.498 16.4963  20
   1   4  -7 168.411 25.5893  25
   1  -4   7 178.953 22.2135  11
  -1   4  -7 149.192 21.3338   9
  -1  -4  -7 118.760 17.9675  19
  -1   4  -7 136.818 21.6297  41
  -1   4   7 118.752 17.4526  20
   1  -4  -7 149.474 22.5339  40
   1  -4   7 125.994 15.8529  42
  -1   4   7 125.567 20.2167  37
  -1  -4   7 177.583 19.8364  37
  -1  -4   7 151.937 20.4327  11
  -1  -4  -7 161.414 28.9910  25
   1  -4  -7 204.701 26.6069  25
   1   4   7 149.466 16.9349  37
   1   4   7 253.198 28.4722  36
  -1  -4  -7 136.762 23.0364   9
   1   4   7 152.537 17.0101  42
  -1  -4   7 137.480 18.2803  26
  -1  -4  -7 181.805 26.7228  28
   1   4   8 33.0313 20.1470   3
   1  -4  -8 89.7904 21.4456  40
  -1   4   8 66.1807 13.1431  42
  -1   4  -8 32.7124 19.2246  41
   1   4  -8 48.4486 23.5884  34
   1  -4  -8 89.4684 23.4127  28
  -1   4   8 54.3168 14.4957  20
  -1  -4  -8 77.9345 21.6450   9
  -1   4   8 44.7547 18.4190  37
  -1  -4  -8 42.2406 25.1757  28
  -1   4  -8 63.2597 18.9343   9
  -1   4   8 55.8194 27.4386  18
   1  -4   8 72.2587 20.1220  18
   1   4   8 51.1562 23.3503  36
   1  -4   8 59.1795 13.6039  20
  -1  -4  -8 75.8171 27.6388  25
  -1   4  -8 68.5518 33.2137  25
   1   4  -8 40.0604 25.8749  25
  -1  -4  -8 60.4124 16.9999  19
   1   4   8 52.6887 24.5999  18
  -1   4   8 71.0670 21.7886  13
  -1   4   8 13.7232 26.5185  11
   1   4   8 60.6492 14.0110  37
   1   4   8 55.7839 16.8097  35
   1   4   8 23.6556 23.0962  11
  -1  -4   8 39.7440 18.3962  11
   1  -4   8 54.8139 13.2720  37
   1  -4  -8 73.6723 26.4439  25
   1   4  -8 46.2925 23.4100   1
  -1  -4   8 43.4527 14.6557  21
  -1  -4   8 59.4228 15.9829  20
  -1  -4   8 54.7509 13.0652  42
   1  -4   8 64.5015 12.3661  42
   1  -4   8 68.4509 19.2343  11
   1  -4  -8 75.9592 17.8596  19
   1   4  -8 49.3057 17.9781  41
   1   4   8 54.8777 18.9883   8
  -1   4   8 60.7422 18.0531  16
  -1  -4  -8 51.4497 18.4564   1
  -1  -4   8 50.5308 19.3052  18
  -1  -4  -8 59.2978 31.3926  29
  -1   4   8 33.3803 17.0088  14
  -1  -4  -8 78.7520 25.0621  40
   1   4  -8 30.2811 23.0596  19
   1  -4  -8 66.7139 17.6263   1
  -1  -4   8 87.5960 15.9732  37
  -1  -4   8 41.3488 14.4721  26
  -1   4  -8 38.9219 25.0420  34
   1   4   8 47.3680 12.4128  42
   1  -4   8 72.5448 16.1779   3
  -1   4   8 52.0707 15.6797  35
   1  -4  -8 50.6876 25.1469  29
  -1   4   9 97.9557 18.6782  20
  -1  -4  -9 146.746 33.6126  25
  -1   4   9 92.0296 23.2414  37
   1   4   9 122.005 28.9842  18
   1  -4  -9 144.135 22.8005  19
   1  -4  -9 117.794 27.3583  28
   1   4   9 129.462 18.7530  37
  -1  -4   9 155.741 25.1852  11
   1   4   9 107.834 27.6702  11
   1  -4  -9 127.876 30.5698  25
  -1   4   9 113.294 18.0040  42
  -1  -4   9 140.652 19.5102  20
   1   4   9 177.375 28.9471  36
  -1  -4  -9 130.024 31.3327  28
  -1   4   9 92.3616 30.8772  11
  -1   4  -9 99.7944 28.7996  34
  -1   4   9 103.736 30.0380  18
   1  -4   9 129.730 17.6957  37
  -1  -4   9 126.139 24.7406  18
  -1   4  -9 146.083 35.3453  25
   1   4  -9 140.737 30.9696  25
   1   4   9 108.423 17.1020  42
  -1   4   9 131.579 20.0386  35
  -1   4  -9 109.922 24.7167  41
   1  -4  -9 111.742 31.0783  29
   1   4  -9 137.456 27.4850  19
   1   4   9 147.400 21.1538  35
   1  -4  -9 151.656 25.6130  40
  -1  -4   9 138.835 17.6783  42
   1   4  -9 73.1808 27.3176  34
   1  -4   9 131.063 24.2612  18
   1  -4   9 114.329 17.4701  20
   1  -4   9 163.664 24.9685  11
  -1   4   9 135.475 26.5852  13
  -1  -4  -9 78.2617 23.3046  19
  -1  -4 -10 221.266 40.0703  25
   1  -4  10 202.234 24.9223  20
   1   4  10 237.542 25.0278  42
   1  -4  10 263.196 32.7806  18
  -1   4 -10 219.195 41.3893  25
   1  -4 -10 235.767 39.8679  25
   1  -4  10 269.544 25.0623  37
   1  -4 -10 283.782 41.7167  29
   1   4  10 184.732 26.1702  37
  -1  -4  10 240.595 32.0173  18
  -1   4  10 222.879 38.8332  11
  -1  -4 -10 294.436 36.9379  40
   1  -4  10 301.261 32.9352  11
  -1  -4  10 285.228 25.4929  42
   1   4 -10 246.923 40.4019  25
  -1   4  10 256.889 26.9765  42
  -1   4  10 208.349 27.4806  35
   1   4 -10 280.237 36.3073  19
   1  -4 -10 202.453 33.1937  40
  -1  -4  10 314.258 28.5141  20
   1  -4 -10 278.669 35.9538  28
  -1   4  10 195.613 38.7205  18
  -1   4  10 186.460 27.4941  20
   1   4  10 248.950 35.2353  18
  -1   4 -10 157.063 34.3150  34
   1   4 -10 171.841 34.6135  34
  -1  -4 -10 144.479 31.3356  19
  -1  -4  10 230.282 32.4336  11
   1   4  10 228.627 28.4129  35
   1  -4 -10 299.604 33.0878  19
   1   4  10 193.209 33.3395  11
  -1   4  10 262.957 34.6393  37
  -1  -4 -11 74.9446 25.0896  19
  -1   4  11 25.4709 28.9837  11
  -1   4  11 55.8738 17.4642  42
  -1   4  11 54.1245 18.8608  35
  -1   4  11 50.3329 29.8256  18
   1  -4  11 57.9266 14.7021  20
   1  -4 -11 40.3315 27.5680  40
  -1   4  11 69.6218 19.5483  20
  -1  -4  11 43.0173 25.7765  18
   1   4 -11-2.82881 24.2388  40
  -1  -4  11 51.7473 18.4762  20
   1   4  11 89.2287 28.0343  18
   1   4 -11 75.0212 37.1459  25
  -1  -4 -11 87.4929 29.8895  40
   1  -4 -11 33.6131 24.9199  19
  -1   4 -11 88.3336 35.2013  25
   1   4 -11 41.5694 29.7981  19
   1  -4  11 82.4304 15.6128  42
  -1  -4  11 81.2804 25.6271  11
   1  -4  11 65.0562 24.8683  11
   1  -4  11 68.4723 25.5411  18
   1   4  11 59.7473 26.2640  11
  -1  -4  11 37.1660 15.9578  42
  -1  -4 -11 65.7686 39.5746  29
  -1   4  11 43.3242 23.8077  37
   1  -4  11 71.5773 15.1834  37
   1  -4 -11 40.0992 30.3784  28
  -1  -4  12 9.55494 16.3814  20
   1   4  12 49.7469 19.5372  42
   1  -4 -12 5.09308 36.7058  29
   1  -4  12-1.07144 25.2977  11
  -1   4 -12 1.27405 34.3985  25
   1   4  12 31.7002 20.1112  37
   1  -4  12-2.68776 12.2255  42
   1   4  12 7.03225 25.4238  11
   1  -4  12 11.4701 13.9708  20
  -1   4  12-1.54046 16.6566  42
   1   4  12 34.5665 26.1815  18
  -1  -4 -12 9.32785 38.1372  29
  -1  -4  12-3.40761 13.7497  42
   1  -4 -12-4.34423 26.8863  40
  -1  -4  12 22.7142 25.3634  18
  -1   4  12 3.89071 27.6724  18
   1  -4  12 20.7060 26.3743  18
  -1  -4 -12 34.8894 26.2113  19
  -1  -4  12-11.7059 25.1751  11
  -1   4  12-7.04777 18.0951  20
   1   4 -12 14.5651 28.5481  19
  -1   4  12-3.23600 22.2083  37
   1   4 -12 28.8270 34.4643  25
   1  -4 -12 32.2944 26.4053  19
  -1   4  12 30.3810 18.5414  35
   1   4 -12-10.5776 24.6738  40
  -1   4  12-10.2089 27.7439  11
  -1  -4 -12 18.6088 29.0680  40
   1  -4  12 10.7154 14.0604  37
  -1  -5   0 4355.86 261.506   7
   1  -5   0 3454.30 261.347   2
   1   5   0 3257.49 260.498   3
   1  -5   0 3903.09 261.592  10
   1  -5   0 3415.02 261.784   7
  -1   5   0 4496.28 261.866   6
  -1   5   0 3919.08 261.852   8
  -1  -5   0 3780.46 261.557  44
   1  -5   0 4097.38 261.734  44
  -1  -5   0 3848.37 261.507   2
   1  -5   1 1434.49 98.6274  10
   1   5  -1 1666.15 98.4414   1
   1  -5  -1 1346.62 98.5784   2
   1   5   1 1266.74 99.6713   4
  -1   5  -1 1174.02 97.9935   9
  -1   5  -1 1582.13 98.8893   1
  -1  -5   1 1200.15 98.1755   2
  -1  -5   1 1481.23 99.3767   7
  -1  -5   1 1177.13 98.5629  44
   1   5  -1 1265.15 99.0526   4
  -1  -5  -1 1551.40 98.9087  44
  -1   5  -1 1374.49 98.5963   8
  -1   5  -1 1542.28 98.4556   6
   1  -5  -1 1397.88 98.7812   7
   1   5  -1 1440.62 98.2411   9
  -1   5   1 1374.36 99.3798   8
   1   5   1 1253.88 98.9318   3
   1  -5   1 1407.58 99.6223   7
   1  -5  -1 1497.97 98.4720  44
   1  -5  -1 1307.30 98.7863  10
   1  -5   1 1398.98 99.0858  44
  -1  -5  -1 1635.75 98.0991   7
  -1  -5   2 1945.96 144.973  44
   1  -5  -2 2228.00 145.336   1
  -1  -5  -2 1965.58 144.821   1
   1  -5  -2 2046.72 144.837   2
  -1   5  -2 2177.41 144.010   6
   1   5   2 2326.93 147.953   3
  -1   5  -2 1826.63 144.964   9
  -1  -5  -2 2399.77 145.195  44
   1   5  -2 2136.73 144.819   9
  -1  -5   2 1703.64 144.085   2
  -1  -5   2 2148.91 146.429   7
   1  -5   2 2239.78 146.480   7
  -1  -5  -2 2325.62 145.573   9
   1   5   2 2025.45 146.039   4
  -1   5  -2 2270.19 145.379   1
   1   5  -2 2450.18 145.126   1
   1  -5   2 1972.73 145.561  44
  -1   5   2 2107.29 145.926   6
  -1   5   2 1996.24 146.059   8
  -1  -5  -2 2005.05 145.603   2
   1   5  -2 1738.60 144.671   4
   1  -5   3 562.645 43.7709  44
  -1   5  -3 554.826 43.8294   1
   1   5   3 604.278 44.3615   4
  -1   5  -3 572.888 44.0423   9
  -1  -5   3 577.240 45.1887   7
  -1   5   3 611.573 44.5287   6
  -1  -5  -3 550.944 43.2273   1
  -1  -5  -3 721.319 43.3932  44
  -1  -5   3 516.050 41.9245   2
   1   5  -3 635.737 43.4626   9
   1  -5  -3 595.067 43.1637  10
  -1  -5  -3 686.694 44.8775   9
  -1  -5  -3 603.339 44.3520   2
   1   5  -3 482.828 42.5400   4
  -1  -5   3 570.021 43.0361  44
   1   5  -3 705.389 43.9703   1
   1   5   3 586.302 48.1685   3
   1  -5  -3 683.233 43.2992   2
   1  -5  -3 577.248 43.5439   1
  -1   5   3 610.573 45.1238   8
   1  -5   3 644.428 45.3091   7
   1   5   4 2579.70 174.357   4
  -1  -5  -4 2419.99 173.602   1
  -1  -5   4 2270.29 172.652  44
   1  -5  -4 2787.74 173.383   2
   1   5  -4 2637.26 174.036   1
   1  -5  -4 2530.95 174.143   1
  -1   5  -4 2322.16 174.048   1
  -1   5  -4 2422.81 174.368   9
   1   5  -4 2036.40 172.194   4
   1   5   4 2492.61 177.629   6
  -1  -5  -4 2567.81 174.488   2
  -1  -5  -4 2662.64 175.364   9
   1   5   4 2147.29 176.967   3
   1  -5   4 2500.23 173.892  44
   1   5  -4 2592.02 173.822   9
  -1   5   4 2505.67 174.514   6
  -1   5   4 2640.82 175.797   8
   1  -5  -4 2571.55 172.902  10
  -1   5  -5 470.442 47.3022  34
   1   5   5 521.006 43.8965   6
  -1   5   5 521.272 42.5512  14
   1  -5   5 492.356 39.2454  42
  -1   5   5 400.369 40.3691  37
  -1  -5  -5 554.589 41.5889   2
   1   5   5 712.785 46.6009  36
  -1   5   5 442.897 42.0576   3
  -1  -5   5 541.611 40.6348  20
   1  -5  -5 576.452 41.9073   1
   1  -5   5 569.288 39.6581  20
  -1   5  -5 469.696 42.1905   1
   1  -5   5 578.821 43.1915   7
  -1   5   5 552.060 41.5993   6
  -1   5   5 609.906 45.3727  13
  -1  -5  -5 572.329 44.0922  40
  -1   5  -5 517.263 42.3365  19
   1   5   5 463.190 45.7213   3
  -1   5  -5 503.932 43.5954  41
   1   5  -5 590.592 41.3311   9
  -1  -5   5 475.132 39.0575  44
   1  -5   5 570.831 39.4882  37
  -1  -5   5 518.991 43.4397   7
  -1   5   5 506.459 42.5082  16
  -1  -5  -5 470.101 43.4221   9
  -1  -5  -5 557.686 46.9573  29
   1   5   5 506.847 40.2454  42
   1   5   5 479.497 40.1543  37
  -1  -5  -5 516.043 41.1012   1
  -1   5   5 464.955 40.5358  20
  -1  -5   5 493.356 40.3973  21
   1   5  -5 601.307 45.3589  34
   1   5  -5 556.980 41.9539   1
   1   5  -5 473.441 39.2249   4
  -1   5   5 636.662 44.4446   8
  -1  -5  -5 564.473 44.9911  28
   1  -5  -5 750.588 45.6994  29
   1   5   5 548.302 41.6718  35
  -1  -5   5 522.824 40.5686  26
   1   5  -5 452.069 41.0938  41
  -1   5  -5 570.187 42.5787   9
   1  -5   5 571.680 40.9343  44
  -1  -5  -6 561.131 40.1425  12
   1  -5  -6 753.020 46.1458  29
   1   5   6 799.893 51.9311   8
  -1   5   6 403.813 38.7129  20
   1   5  -6 557.406 44.0361  34
  -1   5   6 488.921 41.4486  16
   1  -5   6 453.724 37.4728  20
  -1   5   6 446.946 44.5880  11
   1   5   6 426.461 38.0363  27
  -1  -5   6 662.852 40.3114  37
  -1  -5  -6 506.918 42.2904   9
  -1   5   6 391.798 39.5960  37
   1   5   6 492.319 46.6615  18
   1   5   6 502.473 38.7902  42
   1   5   6 456.159 43.8704   3
   1   5   6 706.477 46.9251  36
   1  -5   6 559.981 37.9371  37
  -1   5  -6 441.951 41.8528  41
  -1   5   6 500.155 41.6386  14
  -1   5  -6 505.076 52.9745  25
   1   5  -6 398.536 39.3781  41
   1   5  -6 655.659 44.8562  25
  -1  -5  -6 541.598 39.9524   2
   1   5  -6 456.356 39.1436   9
  -1  -5  -6 522.595 43.4104  40
  -1   5  -6 429.904 40.6610  19
  -1   5   6 635.912 43.5175   8
  -1  -5   6 457.369 37.4790  42
   1  -5   6 429.237 37.1826  42
  -1   5  -6 471.474 42.0540  23
  -1  -5  -6 480.841 39.7946   1
   1  -5   6 515.487 41.6648   7
  -1   5   6 533.818 44.1885  13
  -1  -5   6 465.452 41.5254   7
   1  -5  -6 548.095 39.9000  19
  -1  -5  -6 520.066 46.6948  29
  -1  -5  -6 465.184 38.7750  19
   1   5   6 524.978 40.6942  16
  -1   5   6 393.822 44.0370  36
   1  -5  -6 582.759 41.0726   1
  -1   5   6 425.352 37.9932  42
  -1   5  -6 494.545 41.1028   9
  -1   5   6 552.740 41.6335  35
   1  -5   6 570.975 39.0225  44
  -1   5  -6 437.537 45.6510  34
  -1  -5   6 500.709 39.4270  20
   1   5   6 531.178 40.7172  14
   1   5   6 567.186 42.6824  13
   1  -5  -6 624.080 43.2799  40
  -1  -5   6 411.292 38.3873  26
   1   5   6 522.489 40.6027  35
   1   5  -6 505.251 40.8564  19
   1   5   6 479.364 46.6103  11
  -1  -5   6 408.908 38.3648  21
   1   5  -6 480.071 41.2336   1
   1   5   6 416.156 38.3555  37
  -1   5  -6 350.116 39.8942   1
  -1   5   6 330.413 41.3508   3
  -1   5   6 446.163 44.5456  18
  -1  -5  -6 562.737 45.1949  28
   1   5   7 189.981 25.4345   8
  -1   5   7 118.274 22.1242  13
  -1   5   7 134.699 20.6620  14
   1   5  -7 106.807 17.3844   9
  -1  -5   7 151.785 18.0737  37
   1  -5  -7 133.044 18.4021  19
   1   5  -7 115.883 21.1304  19
  -1   5   7 132.676 18.7615  35
   1   5   7 129.281 27.3940  11
  -1   5   7 78.3033 26.9626  11
  -1   5  -7 119.249 19.9824   9
  -1   5  -7 138.494 21.5593  23
   1   5   7 101.487 23.2334   3
   1   5  -7 116.612 23.1034  34
   1   5  -7 129.447 24.6969  25
   1  -5   7 96.7272 19.0574   7
  -1   5  -7 165.291 35.2200  25
  -1  -5   7 107.043 19.0874   7
   1  -5  -7 154.922 27.1328  29
   1  -5  -7 129.170 18.6268   1
  -1  -5   7 106.436 17.0814  26
   1   5   7 156.100 19.3828  35
   1  -5   7 122.974 14.9449  42
  -1   5  -7 82.2268 21.2102   1
   1  -5  -7 150.648 23.9959  40
  -1  -5   7 115.831 16.8728  21
  -1  -5  -7 170.182 27.4009  28
   1   5   7 139.980 24.6677  36
  -1   5  -7 114.454 27.4487  34
  -1  -5  -7 107.281 21.0812   9
   1   5   7 101.836 15.9508  37
  -1   5   7 138.173 20.3906   8
  -1   5   7 110.068 20.0108  37
   1   5  -7 84.6289 18.6522  41
  -1   5   7 111.272 16.8869  20
   1   5   7 111.225 27.1882  18
   1  -5   7 129.383 15.3608  37
  -1  -5  -7 123.885 17.9224   1
  -1  -5  -7 119.249 23.6064  40
  -1   5   7 84.7291 15.1282  42
  -1  -5  -7 149.863 31.9034  29
   1   5  -7 132.429 21.7369   1
  -1   5  -7 101.456 21.9712  19
  -1  -5  -7 143.013 16.9028  19
  -1  -5   7 114.880 14.7532  42
  -1   5  -7 84.3172 20.7250  41
  -1   5   7 115.209 20.0356  16
  -1   5   7 99.5240 27.4004  18
   1   5   7 123.708 16.1181  42
   1  -5   7 120.251 15.3352  20
   1  -5   8 1026.05 68.0239  37
   1   5  -8 707.735 69.5214  41
  -1   5   8 787.642 67.3543  42
   1   5   8 1033.59 70.6098  35
   1  -5   8 1007.61 70.3168   7
   1   5   8 848.511 74.9106  18
  -1   5  -8 879.632 70.7537   9
   1   5  -8 819.757 69.3127   9
   1  -5  -8 1148.13 74.6572  28
  -1  -5  -8 996.235 74.1488  40
  -1   5   8 657.903 74.7262  11
  -1   5  -8 908.160 78.7362  25
  -1   5   8 829.982 71.0381  16
  -1   5  -8 817.628 74.1124  34
   1   5   8 858.082 68.4745  37
   1   5  -8 981.674 74.9857  25
  -1  -5   8 913.981 67.3561  42
   1   5   8 1472.53 76.6067   8
  -1   5   8 1047.57 71.1171  35
  -1   5  -8 793.881 72.1806  41
   1  -5  -8 1035.75 71.5159   1
  -1   5   8 823.838 70.8955  14
  -1  -5   8 809.856 68.2852  21
  -1   5   8 777.431 70.8251  37
   1   5   8 839.828 74.5860  11
  -1  -5  -8 1036.66 78.8732  29
   1  -5   8 865.427 66.7544  42
  -1   5  -8 749.725 70.1608  19
  -1  -5   8 871.560 69.9493   7
   1   5   8 680.976 70.5875   3
  -1   5  -8 633.881 70.0323   1
   1   5  -8 823.947 70.9440  19
  -1  -5  -8 1022.29 75.1114  28
  -1  -5   8 804.242 68.2617  26
   1   5   8 1325.55 78.8168  36
  -1   5   8 967.752 73.9716  13
   1   5  -8 900.730 73.1168  34
  -1   5   8 800.781 68.8468  20
   1  -5  -8 1091.68 74.0342  40
   1  -5  -8 1134.33 76.6568  29
   1  -5   8 906.211 67.2857  20
  -1  -5  -8 973.751 69.4545  19
   1   5  -8 757.380 70.6485   1
  -1  -5  -8 955.125 70.1623   1
   1   5   8 869.104 68.0309  42
   1  -5  -8 1091.47 70.6941  19
  -1   5   8 668.983 74.8800  18
   1  -5  -9 183.934 23.3862  19
   1  -5  -9 192.473 34.6274  29
  -1  -5  -9 199.665 35.2256  28
   1   5  -9 82.6984 23.3930  41
   1  -5   9 144.387 18.6079  37
  -1   5  -9 115.850 26.9343  19
   1   5  -9 127.068 28.4274  19
  -1   5  -9 156.174 37.3351  25
   1   5  -9 150.164 32.9552  25
  -1   5  -9 104.405 26.6641  41
  -1  -5  -9 162.970 29.3622  40
  -1   5   9 174.151 28.9190  13
  -1   5   9 170.853 26.5879  37
  -1  -5  -9 134.300 37.9376  29
   1   5  -9 124.586 30.5983  34
  -1   5   9 98.8248 34.6697  18
  -1   5   9 175.097 22.7456  35
   1  -5  -9 205.934 30.5897  40
   1   5   9 154.634 18.9241  42
  -1  -5  -9 150.878 24.4256  19
   1   5   9 141.567 20.6246  37
  -1  -5   9 163.172 21.6354  20
   1  -5  -9 202.668 30.5830  28
   1   5   9 150.222 29.6177  11
   1   5   9 179.246 29.5150  36
   1   5   9 187.609 23.8368  35
  -1   5   9 103.075 34.1801  11
   1   5   9 95.7338 29.2117  18
  -1   5  -9 131.625 31.0970  34
  -1  -5   9 163.263 19.7868  42
  -1   5   9 149.689 21.2401  20
   1  -5   9 155.218 19.3000  20
  -1   5   9 99.6064 19.3304  42
  -1   5 -10 90.6495 27.1108  41
  -1  -5  10 158.017 19.2242  42
  -1   5  10 9.09347 35.1358  11
   1  -5  10 123.835 18.1048  37
  -1   5  10 104.276 20.9205  35
   1  -5 -10 157.890 32.2270  28
   1  -5 -10 158.781 36.7854  29
  -1   5 -10 119.260 36.5927  25
  -1   5  10 125.881 19.9302  42
   1   5  10 131.653 19.1379  42
   1   5 -10 142.388 35.4727  25
  -1   5  10 120.974 26.7434  37
  -1  -5  10 174.622 21.6825  20
   1  -5  10 130.606 18.4773  20
  -1  -5 -10 118.702 25.3878  19
  -1   5 -10 103.961 31.2131  34
  -1  -5 -10 89.3813 39.1397  29
  -1   5  10 9.24089 34.9083  18
  -1   5  10 129.827 26.9706  13
   1   5  10 119.281 22.0800  35
   1   5  10 13.3847 29.3739  18
   1   5 -10 97.9992 29.7357  34
   1   5 -10 104.698 29.9072  19
   1  -5 -10 140.282 25.5527  19
  -1   5  10 123.921 21.3890  20
   1  -5 -10 143.534 29.7221  40
   1   5  10 26.3163 28.9806  11
   1   5  10 108.147 20.6886  37
  -1  -5 -10 115.450 35.1407  28
  -1   5 -10 118.550 28.8670  19
   1   5  11 22.3787 18.5015  35
   1  -5 -11 47.3390 25.6376  19
   1  -5 -11 29.8611 37.1311  29
   1   5 -11 47.9691 35.8575  25
  -1   5  11 43.4530 18.4910  35
   1   5 -11 48.9627 30.3763  34
  -1  -5  11 60.4356 17.7234  20
  -1   5  11-5.88000 31.5302  18
   1  -5 -11 22.1320 31.2987  28
  -1   5  11 33.9474 17.6494  20
   1  -5  11 67.6448 15.2491  20
   1   5  11 22.5757 17.4370  37
  -1   5  11 26.7569 22.3279  37
   1  -5  11 32.9952 13.2670  42
   1  -5 -11 33.5882 27.6882  40
   1   5 -11 25.8896 28.8778  19
  -1   5  11 43.3245 17.4891  42
  -1  -5  11 55.0369 14.9143  42
   1  -5  11 25.9608 14.4926  37
   1   5  11 26.1428 26.9467  18
   1   5 -11-2.71138 22.7600  40
  -1   5 -11 28.0305 29.7534  34
   1   5  11 57.8423 28.0481  11
  -1   5  11 17.3579 30.4003  11
  -1  -5 -11 20.0579 22.5807  19
  -1   5 -11 5.37187 34.5985  25
   1  -5  12 278.364 27.8926  42
   1  -5  12 320.276 29.4428  37
  -1  -5 -12 293.188 36.6511  19
  -1  -5 -12 324.190 49.2501  29
  -1  -5  12 355.539 29.4970  42
  -1  -5  12 329.505 31.2414  20
   1   5  12 317.001 38.9661  18
  -1   5  12 180.340 38.5382  11
  -1   5  12 271.442 32.0635  20
   1   5  12 259.953 37.9331  11
  -1   5 -12 271.012 43.1332  25
   1   5 -12 238.507 44.3132  25
   1  -5 -12 314.222 38.5702  40
  -1   5  12 318.379 35.5482  37
  -1   5  12 317.492 32.1475  35
   1  -5 -12 312.706 36.7124  19
   1   5 -12 283.353 39.2562  19
  -1  -5 -12 271.975 39.1540  40
  -1   5  12 293.887 30.2832  42
   1  -5  12 274.076 28.8270  20
  -1   5  12 273.620 40.1320  18
  -1  -6   0 925.789 70.1176   2
   1  -6   0 1115.12 71.0843   7
  -1  -6   0 1202.42 70.2869   7
   1   6   0 806.695 69.0468   3
   1   6   0 1001.39 71.5876   4
   1  -6   0 920.138 70.1381   2
  -1  -6   0 1040.28 70.4143  44
  -1   6   0 981.997 70.5178   8
   1  -6   0 1012.95 70.5454  10
   1  -6   0 1103.69 70.4694  44
  -1   6   0 1148.70 70.6286   6
  -1  -6  -1 26.3370 4.36027  44
   1   6  -1 16.4485 8.60126   4
  -1   6  -1 18.5167 3.64653   9
  -1  -6   1 21.4085 3.75359   2
  -1   6  -1 25.2454 3.63624   4
   1  -6  -1 17.6851 5.06424  10
  -1   6   1 27.4046 5.55751   8
   1   6  -1 23.9142 3.52212   9
  -1  -6   1 28.6554 4.30697  44
  -1  -6   1 28.4208 5.07205   7
   1  -6   1 28.1989 6.78032   7
   1   6   1 21.8542 9.51822   3
  -1   6  -1 15.7784 3.83775   8
   1   6  -1 16.9206 2.39030   3
   1  -6  -1 20.2728 3.71722  44
  -1   6  -1 29.7641 3.98050   6
   1  -6  -1 34.7201 4.35831   2
   1  -6   1 28.9119 4.76587  44
   1  -6   2 245.430 19.7708  44
  -1  -6  -2 287.873 19.3440  44
  -1   6  -2 245.539 19.5259   1
  -1   6  -2 221.540 19.2255   9
  -1  -6  -2 236.685 18.8293   1
  -1  -6   2 229.960 19.1823  44
   1   6  -2 199.562 19.9861   4
  -1  -6   2 197.561 18.1751   2
   1  -6   2 286.421 21.6627   7
   1   6   2 263.238 25.9222   3
   1   6   2 244.655 20.7491   4
  -1  -6  -2 255.230 19.8247   2
  -1   6   2 211.449 20.1644   8
   1  -6  -2 235.382 19.6422  10
  -1  -6   2 253.526 20.5447   7
  -1   6  -2 270.743 18.1234   6
   1   6  -2 230.381 18.7441   9
  -1   6   2 273.887 20.7186   6
   1  -6  -2 236.577 18.9780   2
   1   6  -2 295.212 19.3649   1
   1  -6  -2 255.156 19.1645   1
   1  -6  -3 948.335 82.2176  10
  -1  -6  -3 1113.48 82.0507  44
  -1   6  -3 949.047 82.5008   1
   1   6   3 1023.12 86.9197   3
  -1   6   3 1003.04 83.4688   6
   1  -6  -3 1037.11 82.4822   1
  -1  -6   3 1075.62 81.4798   2
  -1  -6   3 2191.19 85.4401  44
  -1  -6  -3 932.874 82.0238   1
   1   6  -3 1451.25 83.1886   4
   1   6   3 950.818 83.1332   4
   1  -6   3 904.656 82.5306  44
   1  -6  -3 1029.46 82.0533   2
  -1   6   3 973.372 84.1260   8
  -1   6  -3 831.071 82.2787   9
   1  -6   3 1041.09 83.9412   7
   1   6  -3 1846.91 84.3207   9
  -1  -6  -3 1135.29 83.1182   9
  -1  -6  -3 1059.71 82.9990   2
   1  -6   4 371.651 31.0109   7
  -1  -6  -4 391.688 31.2876   9
   1   6  -4 394.708 29.6696   1
  -1   6  -4 339.838 29.5348   9
   1   6  -4 362.096 28.4664   9
  -1  -6  -4 358.696 28.3897   1
   1  -6  -4 422.551 28.4309   2
  -1  -6  -4 365.009 29.2612   2
  -1   6  -4 316.731 29.7097   1
  -1   6   4 359.429 30.5812   6
   1   6   4 372.766 36.1062   3
   1   6   4 360.656 35.4936   6
   1  -6   4 385.163 29.1482  44
   1  -6  -4 336.616 28.5318   1
   1   6  -4 279.752 27.3507   4
   1   6   4 362.656 29.6963   4
  -1  -6   4 357.116 30.6570   7
  -1  -6   4 349.300 27.7664  44
   1  -6  -5 385.139 29.8520  29
  -1   6   5 324.395 26.1904  35
  -1   6  -5 287.600 37.0711  34
  -1  -6  -5 305.058 33.1554  29
   1   6  -5 355.553 28.2549  33
   1   6   5 310.991 25.8774  16
  -1  -6   5 300.889 23.7164  20
  -1  -6  -5 280.388 26.4266   9
   1  -6   5 277.107 21.9602  37
   1   6   5 241.756 31.0867   3
   1   6   5 288.720 25.7479  14
  -1  -6  -5 301.295 24.5668  12
  -1  -6   5 238.300 25.8754   7
  -1  -6   5 243.694 21.9259  44
  -1  -6  -5 331.858 28.9114  40
   1   6  -5 298.730 25.8385   1
   1  -6  -5 329.097 28.0910  40
   1   6  -5 266.653 23.7300   9
   1   6  -5 310.363 26.1781  41
   1   6   5 249.753 23.2267  42
  -1   6   5 287.363 28.3087  13
   1  -6  -5 293.620 24.0078   1
  -1   6  -5 205.761 24.6922  19
  -1   6  -5 176.279 24.5696   1
  -1   6  -5 218.743 26.8625  41
  -1   6   5 298.337 28.0227   8
  -1   6   5 244.702 25.5676  16
   1  -6   5 232.553 23.3343  44
   1   6  -5 326.214 25.4794  19
  -1   6   5 261.728 25.6756  14
   1  -6   5 284.686 22.2932  20
  -1  -6   5 263.210 23.1395  21
  -1  -6   5 274.899 23.2464  26
   1  -6   5 284.110 26.4691   7
  -1  -6   5 271.742 21.7375  42
   1   6   5 237.332 23.0613  37
  -1  -6  -5 264.235 22.9060  19
  -1  -6  -5 264.653 24.3088   2
  -1   6   5 236.465 23.4862  20
   1   6   5 268.673 28.6560   6
   1   6   5 285.343 26.7221  13
  -1   6  -5 259.678 25.4170   9
   1   6   5 341.612 29.2288  36
   1  -6   5 254.625 21.6377  42
   1   6   5 274.626 24.9889  35
  -1   6   5 282.739 25.3777   6
  -1  -6  -5 265.685 23.6026   1
  -1   6   5 196.179 21.9923  42
  -1   6  -5 239.826 28.0463  33
  -1   6   6 117.511 19.8933  13
  -1   6   6 89.9499 13.2708  42
  -1   6   6 108.209 16.0188   6
  -1   6  -6 125.107 38.8696  25
   1   6  -6 94.8584 19.1047  33
  -1  -6  -6 134.336 16.6435  12
  -1   6   6 132.558 20.2294   8
  -1  -6   6 114.571 12.9839  42
   1   6  -6 96.0060 17.7223   1
  -1   6   6 103.800 23.6060  11
   1   6   6 96.6037 22.7228   3
  -1  -6  -6 132.778 16.1568   2
   1  -6  -6 161.219 24.1329  29
   1   6   6 156.461 22.5716  36
  -1  -6  -6 114.286 22.3432  40
   1   6  -6 143.310 25.1223  25
  -1  -6   6 109.087 15.3011  20
   1   6   6 97.0955 14.2157  42
   1   6   6 97.0794 16.2687  35
  -1   6  -6 135.013 17.8088   9
   1   6   6 118.137 27.7814  11
  -1  -6   6 84.9087 14.9333  21
   1  -6  -6 127.762 20.8128  40
  -1  -6  -6 100.883 14.4131  19
   1  -6   6 98.1692 19.0194   7
   1   6  -6 105.628 22.6190  34
  -1  -6  -6 116.569 15.7016   1
   1  -6  -6 116.264 16.0293   1
   1   6   6 119.939 17.6496  16
  -1   6  -6 84.6940 19.5324  41
  -1   6   6 83.6511 14.7706  20
   1  -6   6 120.691 12.8158  42
  -1  -6   6 119.386 18.6252   7
  -1  -6   6 82.1476 14.7204  26
  -1   6  -6 112.224 20.3553  23
  -1   6   6 86.2083 22.0108  36
   1   6  -6 119.483 15.8581   9
  -1   6  -6 130.226 28.5213  34
   1   6   6 99.3015 19.0825   6
   1  -6   6 123.395 13.0695  37
   1   6  -6 89.3336 16.2793  41
  -1   6  -6 99.5730 18.0820  19
   1   6  -6 96.0479 17.9496  19
   1  -6   6 104.813 13.8999  44
   1  -6  -6 95.8434 14.7252  19
  -1   6   6 126.334 18.3867  16
  -1   6   6 81.4851 15.7104  37
  -1   6  -6 89.9499 20.1245  33
   1   6   6 71.4042 17.9584  13
  -1  -6  -6 135.313 27.5399  29
  -1   6  -6 71.9972 17.5194   1
  -1   6   6 107.260 17.2084  14
  -1  -6  -6 129.675 25.2786  28
   1   6   6 217.330 28.3706   8
   1   6   6 127.493 17.5080  14
  -1   6   6 112.191 24.6681  18
   1   6   6 93.3956 14.3891  37
   1   6   6 101.250 15.2709  27
   1  -6   6 115.065 13.1272  20
   1   6   6 125.666 28.1395  18
   1   6  -7 996.278 63.0878  25
   1   6   7 663.233 60.9818   3
  -1  -6  -7 958.032 61.9703  40
  -1   6   7 499.045 61.9139  11
  -1   6   7 627.536 57.5344  37
  -1   6   7 574.237 63.0241  18
  -1   6   7 721.940 58.6537  16
   1   6   7 781.890 58.1302  14
  -1  -6   7 693.793 54.3921  42
  -1   6  -7 881.596 71.0417  25
  -1  -6   7 622.999 57.0049   7
  -1   6  -7 632.589 62.4209  34
   1   6   7 744.062 59.4438  13
   1  -6  -7 748.459 57.4341   1
  -1   6  -7 676.539 59.0749  23
  -1  -6   7 647.352 55.5535  21
   1   6  -7 647.039 56.4485   9
   1   6   7 750.927 64.6580  18
  -1   6   7 615.941 63.0044  36
   1  -6   7 625.902 53.9657  42
   1   6  -7 754.310 58.1838  19
  -1   6   7 829.714 58.8097  35
   1  -6  -7 740.667 56.6811  19
   1   6  -7 664.298 57.9304   1
   1   6  -7 538.802 56.8439  41
   1  -6   7 666.285 54.2860  20
   1   6   7 662.322 55.9451  37
   1  -6   7 837.796 54.9888  37
  -1  -6   7 772.722 56.3603  20
  -1  -6  -7 754.851 55.9968  19
   1   6   7 1061.44 65.5396  36
   1   6  -7 754.520 61.1015  34
  -1   6   7 778.916 61.5002  13
   1   6   7 795.074 58.1930  35
   1  -6  -7 1007.04 64.7564  29
  -1   6  -7 606.266 57.5023  19
   1  -6   7 815.188 58.4409   7
   1  -6  -7 929.566 61.8648  40
  -1   6   7 626.242 54.6975  42
  -1   6  -7 584.162 58.1196   1
  -1  -6   7 625.552 55.4212  26
  -1  -6  -7 940.751 67.0624  29
  -1  -6  -7 743.528 56.5366   1
   1   6   7 743.338 55.7887  42
  -1   6   7 930.244 61.8899   8
   1   6   7 758.559 64.1114  11
  -1   6   7 685.458 58.4755  14
   1   6   7 1179.29 67.5351   8
   1   6   7 740.431 57.8476  16
  -1   6  -7 592.202 58.7638  41
  -1   6  -7 687.916 57.6204   9
  -1  -6  -7 864.267 63.2321  28
  -1   6   7 639.931 56.0624  20
  -1   6   8 114.634 21.2702  37
  -1  -6   8 97.1414 17.1748  21
  -1   6  -8 97.5299 38.1096  25
  -1   6  -8 104.243 24.1660  41
  -1   6   8 85.1000 17.4561  20
  -1   6   8 91.3980 21.1934  14
   1   6   8 97.9523 15.8759  42
   1  -6  -8 112.216 30.0918  29
   1  -6   8 88.5583 14.6821  42
   1  -6  -8 140.740 28.7407  28
  -1   6  -8 98.4462 20.8421   9
  -1  -6   8 105.293 15.8582  42
  -1   6   8 96.8646 21.6185  16
   1   6   8 106.166 29.7538  11
  -1   6  -8 132.109 23.6777  23
  -1  -6  -8 111.604 25.6125  40
   1  -6   8 100.844 19.9404   7
   1   6  -8 89.9047 29.6530  25
   1  -6  -8 140.041 27.5678  40
   1   6   8 137.647 20.7060  35
  -1   6   8 108.669 23.6502  13
   1  -6   8 111.589 15.7358  20
   1   6   8 154.409 27.2620  36
  -1   6   8 95.5581 16.2987  42
  -1   6  -8 73.3223 22.8593  19
  -1  -6   8 106.060 19.3166   7
   1  -6   8 112.929 16.5622  37
   1   6   8 79.6271 29.1192  18
  -1   6   8 105.978 33.1584  11
  -1   6   8 129.939 19.8097  35
   1   6   8 155.189 26.2648   8
   1   6  -8 111.538 24.7114  19
   1   6   8 90.6400 17.5934  37
  -1   6   8 59.7038 32.2571  18
  -1  -6  -8 103.374 31.6342  28
   1   6   8 84.2500 24.4821   3
  -1  -6  -8 120.231 19.6425   1
   1  -6  -8 122.482 18.7085  19
  -1   6  -8 89.9361 29.2710  34
  -1  -6  -8 120.474 18.5033  19
   1   6  -8 65.0930 20.2530  41
  -1   6   8 138.176 24.2109   8
   1   6  -8 64.0854 25.4814  34
  -1  -6  -8 76.2606 33.7682  29
  -1  -6   8 99.2948 18.0569  26
  -1   6   9 126.540 36.8277  18
   1   6  -9 113.511 34.9022  25
  -1   6   9 140.022 21.9038  20
  -1   6   9 138.687 25.7311  16
  -1   6   9 168.191 23.4888  35
  -1   6   9 156.038 24.9962  14
   1  -6   9 159.233 19.6027  37
  -1   6  -9 122.911 26.6156  41
  -1   6   9 119.861 36.7967  11
   1  -6  -9 186.507 32.6279  28
   1   6  -9 149.346 25.9449  41
   1   6   9 217.873 32.1094  36
  -1   6   9 153.848 27.7096  37
  -1  -6   9 163.939 19.5533  42
  -1   6   9 152.063 27.7058  13
   1   6   9 158.894 22.8168  35
  -1   6  -9 131.679 39.5862  25
  -1  -6  -9 187.517 39.0411  29
   1   6  -9 115.252 28.9072  19
  -1   6  -9 109.489 26.0517  19
  -1   6  -9 143.872 32.3475  34
   1  -6   9 181.161 20.0469  20
   1   6  -9 139.394 30.8305  34
   1  -6  -9 173.365 35.7423  29
   1   6   9 169.349 20.2332  42
  -1  -6  -9 181.134 36.9451  28
   1  -6  -9 156.753 22.8793  19
  -1  -6  -9 165.786 23.5874  19
   1   6   9 165.158 32.0465  11
   1   6   9 156.140 21.7198  37
  -1   6   9 127.449 20.4615  42
   1   6   9 121.211 31.0215  18
   1  -6  -9 183.292 30.8567  40
  -1  -6  -9 169.640 29.3806  40
   1  -6 -10 54.5840 21.3779  19
  -1   6  10 47.5062 16.7030  42
   1  -6 -10 99.0384 32.5945  28
  -1  -6  10 70.5744 17.9501  20
  -1   6  10 57.7957 23.3453  13
   1   6 -10 37.3207 28.2550  19
  -1   6  10 4.76089 33.0223  18
   1  -6 -10 16.6422 35.1100  29
   1  -6  10 54.6377 14.9235  20
  -1   6  10-1.56170 34.1326  11
  -1  -6 -10 71.6822 29.2586  40
  -1  -6 -10 43.3845 22.0699  19
  -1   6 -10 41.0836 33.3682  25
   1   6  10 61.2247 16.1251  42
  -1  -6  10 54.6408 15.2385  42
   1  -6 -10 50.3045 27.4144  40
   1   6 -10 65.6442 33.5893  25
  -1   6  10 51.2139 17.9098  20
   1   6  10 63.1372 20.1572  35
   1   6  10 54.5920 17.3517  37
  -1   6 -10 38.2207 29.6966  34
  -1  -6 -10 4.45178 34.4753  28
  -1  -6 -10 115.188 39.0071  29
  -1   6 -10 38.9585 25.3436  19
  -1   6  10 53.2865 24.1499  37
   1   6 -10 45.8944 30.3666  34
  -1   6 -10 63.8598 25.7215  41
   1   6  10 1.35157 28.7788  18
   1  -6  10 51.4433 14.8763  37
  -1   6  10 67.3830 19.2792  35
   1   6  10 14.6159 28.5360  11
  -1  -6  11 185.835 21.8929  42
   1  -6 -11 200.470 29.5179  19
   1  -6 -11 181.929 43.5602  29
  -1   6  11 147.419 22.8013  42
  -1  -6 -11 145.283 42.3568  29
   1   6  11 186.934 25.3518  37
   1  -6  11 191.659 21.0728  37
  -1  -6  11 176.008 24.0358  20
  -1  -6 -11 143.014 32.9491  40
   1   6  11 176.914 33.9397  18
   1   6 -11 134.307 38.4983  25
  -1  -6 -11 186.822 28.8462  19
  -1   6 -11 121.432 33.0572  34
   1  -6  11 173.512 21.7211  20
  -1   6  11 141.619 24.2667  20
   1   6 -11 180.403 36.0213  34
  -1   6 -11 172.433 39.9719  25
   1  -6  11 177.547 20.2513  42
  -1   6  11 160.034 36.9359  11
   1   6  11 162.544 32.9707  11
   1   6  11 194.025 26.1232  35
  -1   6  11 165.581 37.9444  18
  -1   6 -11 127.941 30.7106  19
   1   6 -11 184.927 33.7124  19
  -1   6  11 195.643 25.9970  35
   1  -6 -11 161.878 33.9125  40
   1  -6 -11 135.344 36.4703  28
  -1   6  11 172.259 29.4734  37
   1   6  12 3.34479 26.5055  11
   1  -6 -12 36.7987 24.3584  19
   1  -6 -12 34.3080 37.9618  29
   1  -6 -12 53.7516 33.1922  28
  -1   6 -12 49.7284 26.8108  19
   1   6 -12 53.1828 31.8024  34
  -1   6  12 32.4127 18.0891  35
  -1   6  12 29.6689 28.1645  11
  -1  -6 -12 8.39447 25.0543  19
  -1   6  12 31.4192 17.5609  20
   1   6  12 30.5924 26.3058  18
   1  -6  12 23.4460 14.0082  20
   1  -6  12 15.6656 12.9225  42
  -1  -6  12 10.7791 16.3570  20
  -1   6 -12-13.0796 34.7428  25
  -1   6  12 17.5075 16.3861  42
  -1  -6  12 23.0266 13.2359  42
   1   6 -12 19.4513 27.7966  19
  -1   6  12 50.2513 29.5628  18
  -1   6  12 21.7966 20.6018  37
   1   6 -12 73.3372 36.6750  25
   1  -6  12 34.4118 14.1749  37
  -1   6 -12 6.97483 32.6687  34
   1  -6 -12 64.9086 27.8030  40
  -1   7   0 15197.7 961.715   6
   1   7   0 12759.1 960.183   3
  -1  -7   0 14701.8 961.583  44
   1  -7   0 15374.2 961.569  44
   1   7   0 12201.6 961.683   8
   1  -7   0 15096.0 962.073   7
   1  -7   0 13012.2 961.226   2
  -1   7   0 12668.4 961.429   8
   1   7   0 13596.5 962.577   4
  -1  -7   0 13052.9 961.178   2
  -1  -7   0 15959.8 961.284   7
  -1  -7  -1 453.018 36.6017   2
  -1   7  -1 519.757 36.0011   4
  -1  -7   1 466.242 36.0439   2
  -1  -7  -1 560.628 36.7065  44
   1   7  -1 413.098 34.5972   3
  -1   7  -1 568.017 36.2056   6
   1  -7   1 583.579 38.6851   7
  -1   7   1 603.327 37.9662   6
   1  -7   1 549.053 37.0382  44
   1   7  -1 536.028 35.7570   9
   1   7  -1 482.335 38.5984   4
   1   7   1 522.126 38.7290   4
  -1   7   1 476.559 37.3145   8
   1   7   1 468.273 39.6969   8
  -1   7  -1 425.213 35.2937   9
  -1  -7   1 592.235 37.4622   7
  -1  -7   1 527.191 36.8792  44
   1  -7  -1 501.457 36.4882   2
   1   7   1 681.211 40.6275   3
   1  -7  -1 552.292 36.3285  44
  -1  -7   2 650.780 52.8107   2
  -1  -7   2 733.349 53.8814  44
  -1   7   2 803.795 55.4711   6
   1   7   2 795.221 58.8033   3
  -1  -7  -2 871.865 53.8384  44
  -1  -7  -2 644.103 53.8820   2
   1  -7   2 813.424 55.8922   7
   1   7   2 680.872 55.3475   4
  -1   7  -2 780.306 53.9458   1
   1   7  -2 650.995 54.5448   4
  -1  -7   2 774.632 55.0387   7
   1   7  -2 789.266 53.2692   9
   1  -7  -2 725.398 53.5548   2
   1  -7   2 744.078 54.3472  44
  -1   7   2 646.349 54.8281   8
  -1   7  -2 740.471 52.4606   6
   1   7   2 928.654 62.1420   8
   1   7  -2 835.970 53.5228   1
  -1   7  -2 626.487 53.2235   9
  -1  -7  -2 756.510 53.3395   1
  -1  -7   3 617.054 48.0133   2
   1  -7  -3 700.553 49.4945   1
  -1   7  -3 628.426 49.7633   1
  -1  -7   3 648.925 49.3126  44
  -1   7   3 669.157 51.2590   6
  -1  -7  -3 721.678 50.2162   2
   1   7   3 866.174 62.2519   8
   1   7  -3 521.060 49.2083   4
   1   7  -3 736.828 49.4826   1
   1  -7  -3 692.995 49.1933   2
  -1   7   3 607.548 51.5367   8
   1  -7   3 742.954 52.1987   7
  -1  -7  -3 777.948 49.1654  44
   1   7   3 677.479 51.0188   4
   1   7  -3 680.117 49.0799   9
  -1   7  -3 616.910 49.6706   9
  -1  -7  -3 657.834 49.0283   1
  -1  -7   3 660.294 51.0307   7
   1   7   3 736.751 56.0110   3
   1   7   3 683.836 60.6435   6
  -1  -7   4 8480.29 573.455   7
   1   7   4 6511.82 570.627  42
   1  -7   4 9567.71 574.464   7
   1   7   4 8877.29 574.100  36
  -1  -7  -4 9249.68 572.645   2
  -1  -7  -4 7955.16 571.264   1
  -1   7  -4 7451.02 571.541   1
  -1  -7  -4 9579.34 574.715  28
  -1   7  -4 8575.89 571.404  19
   1   7   4 8080.54 572.550   4
   1  -7  -4 9348.09 572.186   1
   1   7   4 8992.72 573.175  14
  -1   7  -4 6511.45 573.274  33
   1  -7  -4 9292.81 571.523   2
  -1   7   4 8545.73 573.757   6
   1   7  -4 8711.06 574.326  33
   1   7  -4 8736.22 571.578   1
  -1   7  -4 7895.49 572.016   9
   1   7   4 8774.12 576.681   3
   1   7   4 14555.6 590.962   8
  -1   7  -4 6865.05 572.986  41
  -1   7   4 8196.64 575.069   8
   1   7   4 6558.58 571.423  35
   1   7  -4 6450.56 570.061   4
  -1   7   4 5733.05 570.447  37
  -1  -7   4 8092.22 571.104  44
  -1  -7  -4 9604.21 572.428  12
  -1  -7   4 8974.09 571.346  21
   1  -7   4 9055.62 572.371  44
   1  -7   4 8365.96 570.112  42
   1   7   4 8790.52 573.812  13
   1  -7   4 8916.83 570.326  20
  -1  -7   4 8936.97 571.324  26
   1   7   4 8965.57 573.178  16
   1   7   4 8023.58 577.023   6
   1   7  -4 8244.17 571.487   9
  -1   7   5 270.082 23.8557  24
  -1  -7   5 256.699 24.3954  17
  -1  -7   5 228.774 19.5435  44
   1  -7   5 199.113 21.2199  17
  -1   7  -5 198.190 22.1639   1
  -1  -7   5 217.115 20.5626  26
  -1  -7  -5 260.877 30.3315  28
  -1   7   5 210.440 25.4036  13
   1   7   5 204.494 27.2345   6
  -1  -7  -5 202.202 20.4869   1
  -1  -7  -5 208.120 30.8286  29
  -1  -7  -5 253.843 24.4570  39
  -1   7  -5 161.586 25.5694  33
   1   7   5 225.649 24.3174  13
  -1   7   5 176.741 20.4403  20
  -1   7   5 232.504 23.7802  35
  -1  -7  -5 205.470 22.2494   2
  -1   7   5 230.965 23.6585  14
   1   7   5 212.915 21.2943  27
  -1  -7  -5 251.921 26.9857  40
   1   7   5 232.782 30.1191   3
   1   7   5 215.914 22.1485  35
   1  -7   5 246.605 19.2611  20
  -1   7  -5 224.587 22.3288  19
   1   7   5 242.470 23.8146  14
  -1   7  -5 231.196 22.8893   9
   1  -7  -5 357.537 29.8906  29
   1  -7   5 225.321 18.6525  42
  -1   7   5 220.281 26.8915   8
   1   7   5 177.730 20.0246  37
  -1   7   5 232.803 24.2118   6
   1  -7   5 238.332 18.8294  37
   1   7   5 237.815 23.7484  16
  -1  -7   5 207.628 18.5035  42
   1   7   5 235.166 28.9444  38
   1  -7  -5 322.492 29.0696  28
   1   7  -5 239.038 20.7379   9
   1   7  -5 213.199 25.1365  33
   1  -7   5 250.165 21.2038  44
   1   7   5 197.965 20.3132  42
  -1   7   5 225.158 23.7023  16
  -1   7   5 163.421 25.3568  36
  -1  -7   5 210.342 20.3977  21
   1   7  -5 214.031 22.8488  41
   1  -7  -5 217.190 21.1872   1
  -1  -7   5 234.055 20.6137  20
   1   7  -5 238.369 30.9887  34
   1   7  -5 248.692 22.1409  19
  -1   7   5 149.684 19.0045  42
  -1  -7  -5 275.426 22.2360  12
   1   7  -5 193.043 21.8720   1
  -1  -7   6 297.209 24.7276  20
  -1  -7  -6 263.198 24.8881   1
  -1   7  -6 224.366 26.3845   1
   1  -7  -6 312.181 31.5244  40
  -1   7  -6 215.752 29.1533  23
  -1   7   6 218.485 31.5177  18
  -1   7  -6 190.880 27.9646  33
   1  -7   6 203.228 21.3418  42
   1   7   6 282.881 30.9859  36
  -1   7   6 291.724 29.9712  13
   1   7  -6 225.867 27.8637  33
   1   7   6 201.169 23.8762  37
   1   7   6 226.562 23.6908  42
   1   7  -6 222.216 26.6055   1
  -1   7   6 205.388 22.7447  42
  -1   7  -6 292.216 26.6213   9
   1   7   6 267.334 26.8256  14
  -1   7  -6 299.273 48.1980  25
   1  -7  -6 249.746 25.5507   1
   1   7   6 398.013 39.6357   8
  -1  -7  -6 311.470 37.0753  29
   1  -7   6 274.048 24.0634  44
  -1  -7  -6 287.038 30.5810  40
  -1   7  -6 249.684 37.8901  34
   1   7   6 305.968 27.2084  35
  -1  -7  -6 340.476 26.0036   2
  -1  -7   6 223.267 23.9722  26
  -1  -7  -6 299.208 25.4822  12
  -1   7  -6 235.360 26.3360  19
   1  -7  -6 370.042 33.8114  29
   1   7  -6 273.218 26.6156  19
   1  -7   6 285.845 28.2987   7
   1   7   6 277.870 37.3635  18
   1   7  -6 216.367 26.4593  41
   1  -7   6 258.617 22.0211  37
  -1   7   6 323.044 27.8490   6
   1   7   6 273.873 27.1014  16
  -1   7   6 209.365 31.4017  11
   1  -7   6 292.364 22.7937  20
  -1   7   6 227.668 26.6553  16
  -1   7   6 292.787 27.1443  35
   1   7   6 247.806 24.8312  27
   1   7  -6 364.019 34.7426  25
   1   7  -6 271.338 25.1222   9
  -1  -7   6 249.513 24.3165  21
   1   7   6 264.506 28.3836  13
  -1  -7   6 231.511 22.0660  42
  -1  -7  -6 238.976 23.5731  19
   1   7   6 267.161 29.1121   6
  -1   7   6 242.128 26.7415  14
  -1   7   6 192.937 23.8476  20
  -1   7  -6 226.901 28.2044  41
  -1  -7   6 251.612 27.1987   7
  -1  -7  -6 293.803 28.0497  39
  -1   7   6 200.945 31.2698  36
  -1   7   6 292.382 26.0105  24
   1   7   6 237.213 32.5105   3
  -1   7   6 310.861 32.2358   8
   1   7   6 264.123 36.4012  11
   1  -7  -6 364.707 33.2028  28
  -1   7   7 357.414 36.6430  13
   1   7   7 332.143 30.2443  42
   1   7   7 364.592 33.1633  35
  -1   7   7 313.029 31.3319  20
  -1  -7  -7 360.119 33.9104  39
   1   7  -7 297.437 33.1684  41
  -1   7   7 321.829 42.2370  36
   1   7  -7 339.743 33.6211   1
   1  -7  -7 532.324 43.4510  29
  -1   7   7 258.466 29.1040  42
   1   7   7 332.307 33.2139  16
  -1  -7  -7 414.789 38.2278  40
  -1   7  -7 280.761 34.8618  41
   1  -7  -7 329.449 30.9810  19
  -1   7  -7 438.200 52.2709  25
   1  -7   7 303.544 28.1719  42
  -1   7   7 262.870 40.7673  11
  -1  -7   7 368.022 33.1032   7
   1  -7   7 324.021 29.0504  20
  -1   7  -7 261.873 40.5374  34
  -1   7  -7 292.543 35.6421  23
  -1   7   7 264.701 41.0511  18
  -1  -7   7 289.785 30.0783  26
   1  -7   7 405.753 29.2816  37
   1   7   7 570.168 44.0104   8
  -1  -7   7 304.566 30.3670  21
   1   7   7 350.767 42.8558  18
  -1   7   7 460.653 38.9219   8
   1   7   7 342.339 33.4043  14
   1   7  -7 410.807 40.4355  25
   1  -7  -7 422.378 38.0656  40
   1   7   7 331.546 41.9853  11
  -1  -7  -7 409.607 44.7050  29
  -1   7   7 364.099 34.5717  16
  -1  -7   7 343.796 28.7697  42
   1   7   7 319.195 30.8730  37
  -1   7   7 313.169 33.5959  14
  -1   7  -7 241.345 32.6770   1
   1   7  -7 295.515 31.3280   9
   1  -7   7 535.924 36.5187   7
   1  -7  -7 375.797 32.7271   1
  -1  -7   7 369.521 31.3356  20
  -1  -7  -7 378.058 32.1587   1
  -1   7  -7 357.792 33.1335   9
   1   7   7 309.254 37.5218   3
  -1   7  -7 237.332 32.2841  19
   1   7  -7 318.533 38.1123  34
  -1  -7  -7 330.871 30.2906  19
   1  -7  -7 495.898 40.1193  28
   1   7   7 489.140 40.6333  36
   1   7   7 310.738 33.9950  13
  -1  -7  -7 380.514 42.0146  28
  -1   7   7 291.505 32.5675  37
   1   7  -7 349.097 33.7249  19
   1  -7  -8 3559.98 186.663  29
  -1   7   8 2068.05 175.725  42
  -1   7  -8 1956.47 176.994  19
   1   7   8 2788.87 179.464  35
  -1   7  -8 2090.51 179.801  41
   1   7   8 3430.74 186.676  36
   1   7   8 2579.45 179.148  14
   1   7  -8 2896.52 182.662  25
  -1  -7  -8 2716.01 177.394  19
  -1  -7   8 2214.76 176.302  26
  -1  -7  -8 2726.45 177.675  39
  -1   7   8 2822.02 179.842  35
   1   7   8 2403.72 180.726   3
   1   7  -8 2359.13 180.603  34
   1   7  -8 2267.57 177.954  19
  -1   7  -8 2638.82 186.436  25
  -1  -7  -8 3040.87 183.807  28
   1   7   8 2573.83 179.199  16
   1   7   8 2625.52 183.813  18
   1   7   8 2505.91 183.207  11
   1  -7   8 2770.62 175.847  37
   1  -7  -8 3163.24 182.711  40
   1   7   8 2252.60 177.107  37
  -1   7   8 2303.74 179.199  14
  -1   7   8 2646.59 182.519  13
  -1   7   8 2229.13 177.040  20
  -1  -7  -8 2897.14 182.411  40
  -1  -7  -8 3045.44 185.468  29
  -1   7  -8 2276.75 182.340  34
  -1   7   8 2334.21 179.391  16
   1  -7   8 2409.01 175.509  20
   1   7   8 2302.84 176.520  42
  -1   7   8 2229.85 179.153  37
  -1   7   8 2052.99 183.578  18
   1  -7  -8 2780.48 178.397  19
  -1  -7   8 2235.32 176.315  21
  -1   7  -8 2164.67 179.481  23
   1   7  -8 1985.64 178.157  41
  -1   7   8 1957.10 183.052  11
  -1  -7   8 2491.08 175.489  42
   1  -7   8 2336.01 175.094  42
   1   7   9 89.9768 19.6634  35
   1  -7  -9 78.0476 28.7795  40
   1   7  -9 96.8119 28.6380  34
   1   7   9 80.5766 26.9428  36
  -1   7   9 52.0712 21.0944  14
   1  -7  -9 71.3568 34.6833  29
   1   7  -9 55.4711 23.6308  41
   1  -7   9 82.1787 15.0980  37
  -1   7  -9 33.2324 29.5568  34
  -1   7   9 17.4488 35.0938  11
  -1   7   9 44.5436 16.5849  42
   1   7  -9 76.8001 33.3757  25
   1   7   9 85.7884 30.2251  11
  -1   7  -9 28.9885 22.9038  23
  -1   7  -9 50.0191 37.8539  25
  -1   7   9 60.1278 21.3532  16
  -1   7   9 56.0160 18.5674  20
  -1   7   9 98.5697 23.9652  37
  -1   7  -9 52.8763 23.1219  19
  -1  -7  -9 106.431 38.7261  29
   1  -7   9 70.7550 15.1673  20
   1   7   9 118.619 30.9919  18
   1   7   9 66.5521 16.1094  42
  -1   7  -9 29.7940 22.6744  41
  -1  -7  -9 99.2841 35.0480  28
   1   7   9 70.2271 17.6355  37
  -1   7   9 82.0879 18.9891  35
  -1  -7   9 82.0576 15.7846  42
   1  -7  -9 89.7325 18.6017  19
   1   7  -9 75.1366 27.7319  19
  -1   7   9 91.8713 35.9628  18
  -1  -7  -9 68.6396 19.4239  19
  -1   7   9 66.8746 24.7859  13
   1  -7  -9 93.2151 31.9222  28
  -1  -7  -9 82.4385 27.5736  40
   1   7 -10 2.03096 26.9195  19
   1   7  10 72.2524 29.8996  18
  -1   7  10 33.3268 36.6887  18
  -1   7  10 45.3807 16.8896  42
  -1  -7 -10 40.4777 37.9688  29
  -1  -7  10 42.5061 15.1428  42
   1   7 -10 68.7440 30.7591  34
   1  -7 -10 68.7087 21.7947  19
  -1  -7 -10 48.1064 21.5056  19
   1   7  10 49.7807 27.1421  36
  -1  -7 -10 41.0353 37.9447  28
   1   7  10 60.0533 16.9729  42
   1  -7  10 57.7146 14.1386  37
   1  -7 -10 67.0377 29.1206  40
   1   7  10 87.7148 20.3795  35
  -1   7  10 20.3034 35.2950  11
  -1   7 -10 13.5822 37.2244  25
   1   7 -10 86.7451 34.7429  25
  -1  -7 -10 44.1791 27.7227  40
  -1   7  10 36.1112 23.5633  13
  -1   7  10 38.6217 18.6001  20
   1  -7 -10 43.6069 35.7655  29
   1   7  10 76.2941 29.4331  11
   1   7  10 74.3430 19.1210  37
  -1   7  10 57.1032 22.7567  37
  -1   7 -10 8.70416 23.9166  19
  -1   7  10 63.0771 19.7151  35
  -1   7 -10-6.61184 30.3158  34
   1  -7  10 33.0495 14.6909  20
   1   7 -10 36.2079 22.6286  41
  -1   7 -10 43.8405 25.0401  41
   1  -7 -10 28.6751 33.4399  28
   1   7 -11 65.3123 32.6879  34
   1   7  11 132.270 32.8732  18
   1   7  11 97.4868 22.6103  37
  -1   7 -11 122.525 38.0545  25
  -1  -7 -11 78.9277 31.6993  40
   1  -7  11 116.892 18.2429  20
   1  -7 -11 112.718 31.6509  40
  -1   7 -11 118.043 28.0903  19
  -1   7 -11 104.448 28.8672  41
  -1  -7 -11 136.812 43.7049  29
   1  -7  11 109.905 17.0606  42
  -1   7  11 102.985 19.6836  42
  -1   7  11 89.5059 21.5595  20
  -1   7  11 83.4770 21.7308  35
  -1   7  11 88.7833 25.8964  13
  -1  -7  11 111.153 17.8623  42
  -1  -7 -11 121.896 26.3741  19
  -1   7  11 73.6467 35.2887  11
  -1  -7 -11 97.8537 40.8010  28
   1  -7 -11 120.879 26.5932  19
   1   7  11 165.548 23.7659  35
  -1   7  11 132.430 35.8404  18
   1   7 -11 101.963 29.9130  19
   1  -7 -11 72.9195 34.4261  28
   1   7 -11 104.155 36.3940  25
   1  -7  11 117.221 17.1894  37
   1  -7 -11 97.2149 41.3446  29
   1   7  11 125.140 31.7373  11
  -1   7 -11 74.1672 33.2477  34
  -1   7  11 105.805 26.1299  37
   1  -7  12 886.776 65.0859  42
   1  -7 -12 847.390 77.8682  29
   1  -7 -12 744.042 74.2211  28
  -1   7  12 784.682 69.7937  37
  -1   7  12 848.274 73.2599  11
  -1  -7  12 939.984 65.4988  42
  -1  -7  12 909.196 67.6174  20
   1   7  12 901.152 72.2412  18
  -1  -7 -12 779.630 78.3258  29
  -1   7 -12 762.101 75.4948  25
   1  -7 -12 916.921 70.7653  19
  -1   7 -12 665.795 73.6524  34
   1  -7  12 911.569 65.9338  20
   1   7  12 898.432 69.0765  37
  -1  -7 -12 938.174 70.2758  19
   1  -7  12 930.977 65.2872  37
   1   7 -12 621.633 72.4153  34
  -1   7 -12 701.485 69.2453  19
   1   7 -12 798.471 75.5039  25
   1  -7 -12 856.886 72.0765  40
   1   7  12 866.547 68.0644  35
   1   7  12 937.075 72.3468  11
  -1   7  12 810.995 67.9610  35
  -1  -7 -12 804.707 73.0333  40
   1   7 -12 807.794 71.2064  19
  -1   7  12 799.041 72.9360  18
  -1   8   0 390.188 35.1572   8
  -1   8   0 510.603 35.5620   6
   1  -8   0 541.720 35.5644  44
  -1  -8   0 434.044 34.9693   2
   1  -8   0 440.141 34.9277   2
   1   8   0 475.568 38.4645   4
  -1  -8   0 507.845 35.4019  44
   1   8  -1 280.108 28.3006   4
  -1  -8   1 268.270 23.5990   2
   1   8   1 274.560 26.7755   8
   1  -8   1 302.334 24.2340   2
   1  -8   1 382.047 26.8586   7
  -1  -8  -1 278.887 23.9229  44
   1  -8  -1 304.564 23.7595  44
   1  -8  -1 311.599 24.0114   2
  -1   8  -1 292.567 23.7563   4
  -1   8   1 321.162 25.6285   6
   1   8  -1 313.476 23.1464   9
  -1  -8  -1 303.403 24.4252   2
   1   8  -1 368.059 28.0828   6
   1   8   1 305.517 28.3284   4
  -1   8   1 250.747 24.6556   8
   1   8   1 326.168 38.6967   6
  -1   8  -1 342.480 23.6950   6
   1  -8   1 331.240 24.5860  44
  -1  -8   1 354.252 25.0741   7
  -1  -8   1 308.062 24.3988  44
   1   8   2 2071.43 148.333   8
   1  -8   2 2069.62 143.593  44
  -1  -8   2 1766.40 142.110   2
  -1   8   2 1544.89 143.695   8
   1  -8   2 1716.24 142.683   2
   1   8  -2 2209.16 142.663   1
  -1  -8   2 1953.98 143.221  44
  -1  -8  -2 1895.67 142.346   1
   1  -8   2 2336.48 145.708   7
   1  -8  -2 2111.53 143.020   2
  -1  -8   2 2175.64 144.351   7
  -1  -8  -2 1979.52 143.469   2
   1   8  -2 2323.18 142.732   6
  -1   8  -2 2216.14 141.744   6
   1   8  -2 1703.45 143.886   4
  -1  -8  -2 2276.53 143.063  44
   1   8  -2 2025.36 142.321   9
  -1  -8   3 34.3461 9.75708   7
  -1  -8   3 25.9375 5.54119   2
   1   8   3 32.6878 20.1291   8
  -1  -8  -3 37.3319 8.10283   2
  -1   8   3 46.1331 11.5754   6
   1   8  -3 24.4910 12.4259   4
  -1  -8  -3 33.2322 6.15625  44
  -1   8   3 22.1341 11.0970   8
  -1  -8   3 23.6442 6.91976  44
   1   8   3 44.4905 11.3033   4
   1   8   3 8.16078 24.9803   6
   1  -8   3 46.2342 13.1470   7
   1   8  -3 28.8961 7.92461   1
  -1  -8  -3 44.2795 6.44749   1
  -1   8   3 33.3485 7.46107  37
   1  -8  -3 34.8242 6.46013   1
  -1   8  -3 27.4076 9.21736   9
   1   8  -3 35.9959 6.72460   9
   1  -8  -3 35.0998 7.17407   2
  -1   8  -3 28.7076 8.41928   1
   1  -8   4 30.0809 9.10821  44
  -1   8   4 8.65148 7.84820  37
   1   8   4 43.4909 25.1376   8
   1  -8   4 23.2440 11.5900  17
   1   8  -4 33.2338 26.3695  34
   1  -8   4 21.9612 5.96100  42
  -1   8   4 30.2016 13.2387  36
   1  -8  -4 28.2272 7.76654   2
   1   8   4 16.0839 11.3795  35
  -1   8   4 14.4422 12.8200  14
   1  -8  -4 26.5573 7.54836   1
  -1   8   4 27.4722 12.1858  35
   1   8   4 12.8426 13.1438  13
   1   8  -4 14.2564 18.7765  33
  -1   8   4 28.8567 12.0448  24
  -1  -8   4 23.0821 9.64005  21
  -1  -8  -4 27.1273 14.1803  12
  -1  -8   4 29.8017 9.28133  20
   1  -8   4 39.2655 8.81844  20
   1   8  -4 32.1500 10.3976   1
   1   8   4 24.3165 11.6100   4
   1   8   4 20.6877 13.9179  16
  -1  -8   4 25.7191 5.98136  42
  -1  -8  -4 26.1504 16.3516  40
   1  -8   4 17.0738 13.9062   7
  -1   8   4 26.4977 14.6330   8
  -1   8  -4 28.1480 11.6212   9
   1  -8   4 24.2140 6.83718  37
  -1  -8   4 39.7768 13.7155  17
  -1   8  -4 34.1844 16.6850  41
  -1   8   4 24.3074 12.3372   6
   1  -8  -4 32.5286 18.4998  28
  -1  -8   4 26.5039 9.48339  26
  -1  -8   4 29.8775 7.98993  44
  -1   8  -4 27.6728 10.9239  19
  -1   8  -4 12.3376 11.4118   1
  -1  -8   4 17.4578 10.5633   7
   1  -8  -4 31.0363 7.59301  12
   1   8   4 33.6332 15.3108  36
   1   8   4 34.7504 14.3807  14
  -1  -8  -4 23.6632 7.37241   1
  -1  -8  -4 17.2668 16.2947  39
  -1  -8  -4 17.2297 20.8205  28
  -1   8  -4 22.2797 34.3667  34
   1   8   4 29.9422 11.0363  27
  -1   8  -4 26.4791 19.2292  33
   1   8   4 26.4471 9.27094  37
   1   8  -4 23.3338 10.2607  19
  -1   8  -4 7.84281 12.8385  31
   1   8   4 44.9229 21.7314  38
   1   8  -4 24.4745 7.84017   9
   1   8   4 14.6531 23.1480   6
  -1   8   4 26.9747 13.2498  16
   1   8   4 22.4010 8.19407  42
  -1  -8  -4 33.1960 9.90200   2
   1   8  -4 22.2413 13.1917  41
  -1  -8   5 309.150 24.8744  42
  -1  -8   5 346.270 26.5696  20
   1  -8   5 349.568 24.8195  36
  -1   8   5 268.836 30.2306  14
  -1  -8  -5 328.780 36.3428  29
  -1   8  -5 328.998 28.9647   9
   1   8  -5 289.896 29.5255  41
  -1   8   5 280.552 31.4806  13
   1   8  -5 265.250 31.9837  33
   1   8   5 261.589 26.3545  42
   1  -8  -5 346.705 27.5569   1
   1   8   5 509.890 46.8916  22
   1   8   5 322.386 35.3896  38
  -1  -8  -5 322.459 30.8322  39
  -1   8   5 267.638 31.8474  36
  -1   8  -5 267.112 31.9901  41
   1   8   5 254.960 27.1113  27
  -1  -8  -5 350.745 28.4319  12
  -1   8   5 332.427 29.8749  24
   1  -8  -5 430.763 35.5676  28
  -1  -8  -5 393.527 29.0638   2
   1   8   5 277.599 30.5069  13
   1   8  -5 365.610 27.8497  19
  -1  -8   5 321.780 29.2766   7
   1   8   5 323.556 30.6615  14
  -1   8  -5 313.779 27.9636  19
  -1  -8   5 354.197 30.3043  17
  -1   8   5 311.024 29.5516  35
   1  -8   5 357.981 27.7744  44
   1   8  -5 301.597 26.8086   9
   1   8   5 328.069 30.7378  16
   1  -8   5 310.227 24.9925  37
   1  -8   5 313.945 24.8781  42
  -1  -8   5 334.467 26.7826  26
  -1   8   5 208.461 26.2916  37
   1   8   5 277.031 35.0317   6
  -1   8  -5 251.973 27.6258   1
   1   8   5 474.702 44.5955   8
   1   8  -5 331.933 28.0592   1
   1   8  -5 340.422 37.7194  34
  -1   8  -5 218.753 32.0662  33
  -1  -8   5 312.767 26.2732  44
  -1  -8  -5 324.928 26.9377   1
   1  -8   5 344.326 25.5712  20
  -1   8  -5 222.884 45.2268  34
  -1  -8  -5 420.949 37.2293  28
  -1   8   5 210.098 25.0863  42
   1  -8   5 364.242 28.9662  17
  -1   8   5 347.524 31.1167   6
   1  -8   5 368.567 31.8343   7
   1   8   5 263.435 26.7177  37
   1   8   5 246.737 28.8257  35
  -1  -8   5 315.434 26.5834  21
  -1   8   5 301.195 30.4601  16
  -1  -8  -5 363.315 32.3244  40
   1   8   6 489.884 44.7727   8
  -1   8   6 211.397 25.8961  20
   1   8   6 280.244 28.6744  35
  -1  -8  -6 265.676 30.5323  39
   1  -8   6 284.454 23.8194  37
  -1  -8  -6 319.983 38.5465  28
   1  -8  -6 386.713 36.9079  28
   1  -8   6 263.137 23.7273  42
  -1   8  -6 230.354 28.9564   1
  -1  -8   6 271.392 23.8061  42
  -1   8  -6 278.301 32.3793  23
  -1  -8   6 263.742 25.8572  26
  -1   8   6 202.382 24.2686  42
   1  -8   6 356.720 26.9246  44
  -1   8  -6 236.065 31.0251  41
   1   8  -6 247.259 25.5403   9
  -1  -8  -6 306.347 26.7068   1
  -1  -8   6 248.533 25.9346  21
   1   8   6 223.104 26.0809  37
   1   8   6 290.147 33.7468  36
  -1   8   6 260.842 29.6301  16
  -1  -8   6 293.838 25.8788  20
   1  -8   6 351.371 27.8497  17
   1   8   6 296.263 29.2865  14
  -1  -8   6 301.461 29.1780   7
  -1  -8  -6 326.709 27.3508   2
  -1   8  -6 201.547 30.8798  33
   1  -8  -6 371.161 36.9058  29
   1   8   6 249.356 26.9241  27
  -1   8   6 334.768 28.9833  24
  -1   8   6 312.706 29.2983  35
   1   8  -6 260.566 28.8444  41
  -1   8   6 244.912 35.0419  36
   1   8   6 326.519 29.9497  16
   1   8   6 267.742 31.6829   6
  -1   8   6 269.421 29.8314   6
  -1   8   6 392.898 36.6717   8
   1  -8  -6 371.597 28.2090   1
  -1   8  -6 267.825 28.2567   9
  -1  -8  -6 314.953 38.8916  29
   1   8  -6 259.458 36.1322  34
  -1  -8  -6 311.672 25.9044  19
   1   8  -6 293.449 28.1811  19
   1  -8   6 382.374 31.7028   7
  -1  -8  -6 281.024 33.0946  40
   1   8   6 255.321 25.8306  42
  -1   8  -6 256.381 28.5353  19
  -1  -8  -6 362.906 28.4104  12
  -1   8   6 283.734 29.8792  14
   1   8   6 258.780 29.8259  13
   1   8  -6 257.859 30.5919  33
  -1   8   6 263.294 30.9175  13
   1   8  -6 242.414 28.1192   1
   1  -8   6 272.394 24.1213  20
   1  -8   7 9.00059 17.4222   7
  -1   8   7 1.79360 11.6731  42
  -1   8   7 14.1767 16.2459  14
   1  -8   7 2.33295 9.55342  42
  -1  -8  -7 1.15365 31.7404  29
   1  -8  -7-12.4693 23.0773  40
  -1   8  -7-12.1038 33.2253  34
   1  -8  -7-3.24905 28.1030  29
   1   8   7-4.27715 16.2923  35
  -1  -8   7 4.22492 13.7552   7
   1   8   7-7.27036 12.5126  42
   1  -8  -7-8.28789 24.9018  28
  -1   8   7 17.6815 13.4097  20
   1   8   7 10.1212 22.4138  36
   1   8   7 11.7067 17.8490  13
  -1   8  -7-13.7816 16.4906   9
  -1   8   7-14.2478 17.9046  16
   1  -8  -7 3.08261 14.4115   1
   1  -8   7-1.88263 10.8796  20
  -1   8   7-0.90281 16.5654  35
   1   8  -7 5.35285 12.5245   9
   1   8  -7 2.98938 19.2357   1
  -1  -8  -7 9.87926 13.3389   1
  -1   8  -7 7.54785 18.6344  41
  -1  -8  -7-10.9893 21.0758  39
   1   8  -7-0.92641 16.8884  41
  -1   8  -7 5.47304 19.8585   1
   1   8   7-0.91810 16.3496  16
   1   8  -7 1.79591 19.0864  33
  -1  -8  -7-10.9532 23.7993  40
  -1  -8   7-5.95205 13.3181  20
  -1   8   7 10.9803 18.3369  13
  -1  -8   7 3.27215 10.3455  42
   1   8   7 1.82638 16.1503  14
  -1   8   7 1.34769 22.0730   8
  -1   8   7 2.98742 28.9132  36
   1  -8  -7-3.34745 12.7510  19
   1   8   7 5.13519 12.9064  37
  -1  -8  -7-4.29017 30.8339  28
  -1  -8   7 1.24219 13.1699  21
  -1   8  -7 46.4800 43.5827  25
  -1   8  -7 1.01776 19.6720  33
   1   8  -7-12.5965 28.2198  25
  -1  -8  -7-9.09081 14.4287  12
   1  -8   7 0.44206 9.81614  37
  -1  -8  -7 3.02536 12.7056  19
  -1  -8   7 3.10905 13.1372  26
   1   8   7-21.2534 26.7081   8
  -1   8  -7 2.85208 17.6780  19
   1   8  -7 14.3027 17.2988  19
  -1   8  -7-10.7694 20.9965  23
   1  -8   8 59.7557 13.8428  42
   1   8   8 97.5842 27.6731  36
  -1  -8  -8 77.8606 28.4412  40
   1   8  -8 36.1451 19.9921  41
  -1   8   8 39.6532 20.8276  37
   1  -8  -8 96.0484 17.5206  19
   1  -8  -8 61.3423 33.2170  29
  -1  -8   8 61.5054 13.6844  42
  -1   8   8 63.4032 15.7242  42
  -1  -8   8 84.5743 17.5806  26
   1  -8   8 79.4368 14.3820  37
   1   8   8 62.5161 15.2513  42
  -1   8  -8 74.0482 31.4864  34
  -1   8  -8 64.6661 40.2985  25
   1   8   8 86.8621 20.9456  16
   1   8   8 72.6495 21.9903  13
  -1  -8   8 85.9544 17.0228  21
   1   8   8 61.8901 16.7679  37
  -1   8  -8 58.4530 21.4504  19
  -1  -8   8 46.4723 17.2995  20
  -1  -8  -8 82.3221 34.3866  28
   1  -8  -8 77.8757 27.9155  40
  -1   8   8 74.6551 16.9497  20
  -1   8   8 76.8731 21.3023  14
  -1   8  -8 37.0265 23.4045  23
  -1  -8  -8 89.9170 38.0592  29
  -1  -8  -8 98.1897 17.3089  19
   1   8   8 91.3159 20.6395  14
  -1   8  -8 44.0752 22.5117  41
   1  -8   8 82.1870 15.2436  20
   1   8  -8 72.3686 23.3893  19
   1  -8  -8 107.285 30.1879  28
  -1   8   8 62.9145 20.3271  16
   1   8  -8 67.1547 27.6394  34
   1   8  -8 71.0760 33.3141  25
   1   8   8 68.7992 18.2823  35
  -1   8   8 44.8808 21.8413  13
  -1  -8  -8 18.9676 22.9287  39
   1  -8  -9 181.301 32.3167  40
  -1  -8  -9 115.082 29.7988  40
  -1  -8  -9 146.919 22.8445  19
  -1   8   9 127.321 22.7301  35
  -1  -8  -9 176.894 41.8783  29
   1   8   9 136.703 21.7016  37
  -1   8  -9 113.056 26.4703  41
   1   8   9 88.9133 23.2870  16
  -1   8   9 110.531 24.6664  16
   1   8  -9 107.555 28.0633  19
   1   8   9 154.111 23.0682  35
  -1  -8   9 136.559 21.4206  20
   1  -8  -9 141.522 21.3691  19
  -1   8   9 99.4351 20.2301  20
   1   8   9 196.525 32.5194  36
   1   8  -9 112.001 31.5017  34
  -1   8   9 109.975 26.7139  13
   1  -8   9 142.173 17.8860  37
  -1   8   9 111.594 25.0627  37
   1   8   9 122.909 19.6325  42
  -1   8  -9 39.1560 40.1632  25
  -1   8   9 104.781 19.3346  42
  -1  -8   9 145.516 18.2356  42
   1  -8  -9 179.837 39.4349  29
   1   8  -9 167.164 36.4918  25
   1  -8   9 97.9876 17.9103  20
   1   8   9 139.963 24.5206  14
   1  -8  -9 124.055 35.6386  28
  -1   8   9 126.186 25.2015  14
  -1  -8  -9 119.211 38.4929  28
  -1   8  -9 101.180 25.0651  19
  -1   8  -9 84.2235 26.3563  23
   1   8  -9 95.8953 25.3702  41
  -1   8  -9 81.0514 33.5505  34
  -1   8 -10-11.8827 25.1087  41
   1   8 -10 21.8451 25.9734  19
  -1   8  10 21.2652 21.5019  37
   1   8  10 4.22799 27.7895  36
  -1   8  10 16.2838 22.5826  13
  -1  -8 -10-8.61140 27.5564  40
  -1   8 -10-11.9579 36.7386  25
   1  -8  10-2.02183 13.9063  20
   1   8 -10 3.65646 23.8984  41
   1  -8 -10-23.6579 32.7246  28
  -1  -8 -10 3.38634 20.0413  19
  -1   8  10-13.7288 19.5333  35
   1  -8  10 5.72594 13.3602  37
   1   8 -10-10.2984 31.5761  34
   1  -8 -10 2.37936 27.7231  40
   1   8  10 8.20017 18.3475  35
  -1   8 -10-71.1548 32.7674  34
   1   8  10 17.2133 17.4336  37
  -1  -8  10 5.31949 13.8943  42
   1   8  10 19.3089 14.9755  42
  -1  -8 -10 10.5349 40.4450  29
  -1   8 -10-17.2183 24.6212  19
   1  -8 -10 2.82661 37.7522  29
   1   8 -10-3.61504 33.3198  25
  -1  -8 -10-3.80161 37.1883  28
   1  -8 -10-8.27945 21.0263  19
  -1   8  10 5.52463 15.1441  42
   1   8  11 2.90487 19.7770  35
   1   8 -11-20.5718 36.5731  25
  -1  -8 -11 59.6351 40.5464  29
   1  -8 -11-5.56730 41.0010  29
   1   8  11 10.7040 18.1438  37
  -1  -8  11-0.65108 13.5408  42
  -1  -8 -11-40.7516 38.7728  28
   1   8 -11 5.90078 26.4517  19
  -1   8  11-25.5760 24.2632  37
  -1   8 -11 11.3523 25.9284  41
  -1   8 -11-16.8728 30.4578  34
   1  -8  11 13.6205 13.7663  20
  -1   8  11 15.9479 19.8481  35
  -1   8 -11 4.86997 34.7950  25
  -1  -8 -11-28.6879 31.3922  40
   1  -8  11 5.00126 12.4858  37
  -1   8  11 84.9097 31.1783  13
   1  -8 -11 10.2534 29.4929  40
   1  -8 -11 2.37551 35.8123  28
   1  -8  11 6.43342 12.9010  42
   1   8 -11 27.0261 31.4838  34
   1   8 -11 10.5632 22.8527  41
  -1   8 -11-15.0065 25.8255  19
  -1  -8 -11 4.11052 21.7949  19
   1  -8 -12 169.499 31.4345  40
   1   8 -12 123.459 34.8612  34
  -1  -8 -12 165.545 42.9552  29
  -1   8  12 157.840 24.1652  35
  -1   8  12 131.160 25.7782  37
   1   8  12 165.548 24.3200  35
  -1   8 -12 138.110 35.9432  34
  -1  -8 -12 152.806 27.3158  19
   1   8 -12 108.547 30.0210  19
   1  -8 -12 132.357 37.6281  28
  -1  -8 -12 132.591 31.7527  40
   1   8  12 132.002 23.1457  37
   1  -8  12 176.579 20.2515  20
   1  -8 -12 212.350 41.2093  29
  -1   8 -12 180.149 29.2241  19
   1  -8  12 151.712 18.7647  42
  -1   9   0 240.613 20.3967   6
  -1  -9   0 262.184 20.4357  44
  -1   9   0 210.490 20.2347   8
   1  -9   0 229.075 19.8207   2
   1  -9   0 300.726 20.5743  44
  -1  -9   0 219.914 19.9440   2
   1   9   0 224.337 25.3055   4
   1   9   0 231.918 27.8572   6
   1   9   1 853.157 93.3078   8
  -1  -9   1 1200.24 92.6500   7
   1   9  -1 1080.10 91.1196   9
  -1  -9  -1 999.263 92.3270   2
   1  -9  -1 1032.88 92.0063   2
  -1   9   1 899.976 92.4607   8
   1   9   1 951.536 100.200   6
   1  -9  -1 1154.62 91.9733  44
   1   9   1 994.866 94.6115   4
   1   9  -1 1253.07 93.9674   6
  -1  -9   1 949.934 91.6910   2
  -1   9   1 1108.60 93.2636   6
  -1  -9   1 1107.24 92.5193  44
   1   9  -1 920.957 94.4094   4
  -1  -9  -1 1015.87 92.0457  44
  -1   9   2 8270.99 684.571  24
   1   9   2 9527.83 686.692   8
  -1  -9  -2 9323.29 681.779   1
   1  -9   2 10403.8 683.319  44
  -1  -9   2 10296.5 683.621   7
   1   9  -2 9117.44 683.756   4
  -1   9   2 10291.7 684.964   6
   1  -9   2 9895.74 683.550  17
  -1  -9   2 10075.3 684.208  17
  -1   9   2 8072.69 683.552   8
   1  -9  -2 10349.4 682.670   2
   1   9  -2 7943.49 684.125  31
   1   9  -2 10707.1 687.181  15
   1  -9   2 11417.8 685.503   7
  -1  -9  -2 11245.6 683.885  39
   1   9   2 9368.42 684.578   4
  -1   9   2 11057.3 690.169  30
   1   9   2 9513.65 691.501   6
  -1  -9  -2 11358.3 682.727  44
   1   9   2 10500.6 684.622  13
  -1   9  -2 11392.8 682.322  19
  -1   9  -2 7718.03 684.684  31
  -1   9   2 9008.05 683.216  36
  -1  -9   2 9843.18 682.293  26
   1  -9   2 9023.70 681.180  20
  -1  -9   2 10032.0 682.347  21
  -1  -9   2 9394.01 681.868   2
   1   9  -2 10186.8 681.749   9
   1  -9   2 9354.52 682.486   2
   1   9  -3 968.760 67.1302   9
  -1   9   3 695.703 69.7342   8
   1  -9   3 1174.90 72.2387   7
   1   9   3 949.269 79.9890   6
  -1  -9   3 1006.40 70.0882  17
  -1  -9  -3 939.390 67.0680   1
   1   9   3 916.240 70.0471  24
   1   9   3 1092.74 77.5478   8
  -1   9   3 953.258 69.2794  15
  -1   9  -3 702.776 74.2178  33
  -1   9   3 829.823 70.8866  13
  -1   9  -3 856.834 69.4265  22
  -1   9   3 876.141 70.1532  16
   1  -9  -3 1004.89 67.5408   1
  -1   9  -3 728.980 69.9190  31
   1  -9  -3 1006.71 67.6929   2
   1   9  -3 911.550 69.4714  41
  -1  -9   3 1003.87 67.9057  26
   1  -9   3 943.824 66.7533  26
   1  -9   3 1016.77 66.1669  42
  -1   9   3 911.414 70.4679  14
   1  -9   3 950.539 66.7604  21
  -1   9   3 757.874 70.5198  38
   1   9  -3 818.799 69.5761  31
  -1  -9   3 912.354 66.4959   2
   1  -9  -3 1253.20 73.4191  28
   1   9  -3 1050.35 67.5104   1
  -1   9   3 820.994 70.0536  24
  -1  -9   3 1006.07 68.1147  44
  -1  -9   3 986.582 66.9296  20
  -1   9  -3 929.508 67.8853   1
  -1  -9  -3 962.976 68.2991  12
   1   9   3 907.888 69.4335  36
   1   9   3 1298.28 80.5894  22
   1  -9  -3 1037.49 67.3623  12
   1   9   3 966.794 70.6107  13
   1  -9   3 863.883 67.4283   2
  -1  -9   3 919.282 65.8074  42
  -1  -9   3 1009.78 67.8766  21
  -1  -9   3 968.677 69.3516   7
  -1   9   3 725.798 72.2980  32
  -1  -9  -3 1075.55 73.7864  28
  -1   9   3 958.892 71.4142   6
   1  -9   3 866.301 65.6681  37
  -1   9  -3 1030.25 67.5592  19
  -1  -9  -3 989.589 68.5975   2
   1   9   3 715.277 67.6212  27
   1   9   3 654.220 67.1484  35
   1   9   3 789.822 71.6016  38
  -1   9  -3 1233.55 78.8896  15
   1  -9   3 969.731 66.4541  20
  -1   9   3 725.398 66.7523  37
   1   9   3 756.666 66.8605  37
   1  -9   4 218.528 27.5011   7
  -1  -9   4 238.272 19.2539  20
   1   9   4 211.681 33.7669   6
  -1  -9  -4 232.431 20.4707  12
  -1   9   4 183.302 23.2367  14
  -1  -9  -4 196.813 30.2699  28
  -1   9  -4 186.853 20.4996  19
   1   9   4 198.791 24.3899  16
   1  -9   4 199.510 23.2238  17
  -1   9  -4 136.791 32.0201  33
  -1   9   4 186.725 22.2802  24
  -1  -9   4 190.455 19.4949  26
  -1   9  -4 173.529 20.9047   1
   1   9   4 188.864 20.1944  27
   1   9  -4 170.504 17.8404   9
  -1   9  -4 152.174 23.2925  31
   1   9   4 207.524 24.3481  14
  -1  -9   4 202.018 18.6562  44
   1  -9  -4 223.239 18.6240  12
  -1  -9  -4 204.481 18.3678   1
   1   9   4 165.980 21.8345   4
   1  -9  -4 251.618 19.1134   2
   1   9  -4 173.730 22.2667  41
  -1   9   4 164.660 23.8070  13
   1   9   4 190.869 29.0970  38
   1   9   4 318.344 39.2643  22
   1   9   4 150.325 18.4593  37
   1  -9   4 193.941 16.9495  37
  -1   9  -4 68.3222 51.9772  34
  -1  -9   4 187.502 19.4173  21
   1  -9   4 209.684 17.3534  42
  -1   9  -4 153.971 43.1990  15
   1  -9   4 192.553 18.0446  20
   1   9  -4 227.770 37.5839  34
  -1   9   4 175.926 20.9274  35
   1   9   4 145.019 22.7491  13
   1   9   4 280.402 35.5318   8
  -1   9   4 166.714 24.5083   8
   1   9  -4 220.783 19.4912   1
  -1   9   4 141.087 22.4166  36
  -1   9   4 191.804 25.1988   6
   1   9  -4 160.582 27.2243  33
  -1   9   4 200.283 23.4735  16
   1   9   4 203.193 23.0678  36
  -1  -9   4 226.048 22.6805  17
   1   9   4 181.108 21.2886  24
   1   9  -4 235.952 19.4039  19
  -1  -9  -4 205.075 19.7548   2
   1  -9   4 241.009 21.0581  44
   1  -9  -4 275.193 29.2959  28
  -1  -9   4 195.820 16.4979  42
  -1  -9  -4 232.130 25.4073  39
   1  -9  -4 223.419 18.5043   1
  -1   9   4 143.083 18.1426  37
  -1  -9   4 202.920 21.3204   7
  -1  -9  -4 257.539 25.0809  40
  -1   9   4 156.298 23.5483  38
  -1   9  -4 167.026 28.6857  41
   1  -9   5 577.186 42.6083  44
  -1  -9   5 562.847 40.9456  20
   1  -9  -5 639.480 42.3657   1
   1   9   5 553.514 45.3307  16
   1  -9   5 547.360 43.4960  17
  -1   9  -5 525.963 42.3145  19
  -1   9  -5 450.108 42.1768   1
  -1   9  -5 495.052 48.7544  23
  -1  -9  -5 661.937 52.3486  28
   1   9   5 579.522 51.7764  38
  -1   9   5 535.005 46.7151   6
  -1   9  -5 513.748 46.8582  41
   1   9  -5 596.657 53.2371  34
  -1  -9  -5 572.894 46.1814  39
   1   9   5 459.953 44.8356  13
   1   9   5 908.772 63.4673  22
   1  -9   5 492.869 39.3085  42
  -1   9  -5 593.242 56.8153  15
  -1  -9  -5 608.068 43.0730   2
  -1   9   5 577.867 45.0745  24
  -1  -9   5 542.911 41.1436  44
   1   9   5 434.422 42.9351  35
  -1  -9   5 515.260 39.3414  42
   1   9  -5 470.545 41.0423   9
  -1  -9  -5 647.862 47.5489  40
   1  -9  -5 556.783 41.4808   2
   1   9   5 575.338 46.9646  36
  -1  -9   5 544.278 43.8164   7
   1   9  -5 538.431 41.5143  19
  -1   9   5 417.627 46.1585  36
   1   9   5 842.138 59.7351   8
  -1  -9   5 496.283 41.0963  21
   1  -9   5 547.345 40.1130  20
   1   9   5 435.365 42.2273  27
  -1   9  -5 445.461 47.5770  33
   1   9  -5 480.198 47.4356  33
   1   9   5 415.152 41.0975  37
  -1   9   5 357.186 40.8163  37
  -1   9  -5 500.579 62.6577  34
  -1   9   5 467.302 49.4075   8
   1  -9  -5 668.638 50.0743  28
  -1  -9  -5 559.274 41.5541   1
   1   9   5 434.633 40.6322  42
   1   9   5 500.679 44.6628  14
  -1   9   5 489.711 43.6732  35
  -1  -9  -5 676.877 43.9403  12
  -1  -9   5 478.914 41.0880  26
  -1  -9   5 602.083 44.7607  17
   1   9  -5 428.995 41.0950   1
   1  -9   5 644.527 46.8063   7
   1  -9   5 537.872 39.2558  37
   1   9   5 523.449 51.5931   6
   1  -9   6 4461.70 256.554  44
   1   9  -6 3361.50 257.179  41
  -1  -9  -6 4319.16 261.853  29
   1  -9   6 4395.35 256.993  17
  -1  -9   6 3228.49 254.124  26
   1   9   6 3254.83 255.333  37
   1   9   6 3296.27 255.815  27
  -1   9   6 3091.20 260.344  36
   1   9   6 3649.01 257.078  35
  -1  -9  -6 4331.84 261.614  28
  -1   9  -6 3329.55 259.460  23
   1   9   6 3827.25 258.238  14
   1  -9  -6 4958.94 262.356  28
   1  -9   6 3877.74 253.852  20
  -1   9  -6 2841.22 254.756   1
   1   9  -6 3087.07 257.178  33
   1  -9   6 3425.57 253.199  42
   1  -9   6 3756.35 253.222  37
  -1  -9   6 3435.71 253.145  42
  -1   9   6 3392.99 259.194  13
   1   9   6 4061.88 261.197  36
   1   9   6 3560.69 260.045   6
  -1  -9   6 3222.57 254.096  21
   1   9   6 3474.49 258.329  13
  -1   9  -6 2813.22 257.943  33
  -1  -9  -6 3717.62 254.707  19
  -1   9   6 4296.85 265.602   8
  -1   9   6 3919.65 257.776  35
   1   9  -6 3745.61 255.135  19
   1   9  -6 3973.73 261.309  34
   1   9   6 2926.02 254.198  42
  -1   9   6 4030.81 257.763  24
  -1  -9  -6 3881.91 255.490   1
  -1   9  -6 3757.08 265.840  34
  -1  -9  -6 3474.92 257.923  40
  -1  -9  -6 4413.14 256.976   2
  -1  -9   6 4089.16 254.856  20
   1   9  -6 3432.63 255.299   1
  -1   9   6 3351.42 257.986  16
   1   9  -6 3275.76 255.053   9
  -1  -9  -6 4606.60 257.503  12
   1   9   6 3721.52 258.102  16
  -1  -9  -6 3981.35 257.146  39
  -1  -9   6 4106.70 257.164  17
  -1   9   6 3779.21 259.056   6
  -1   9   6 2703.27 254.820  37
  -1   9   6 3322.08 257.890  14
  -1   9  -6 3211.08 254.859  19
   1  -9   7 395.060 31.8555  42
  -1   9   7 472.438 41.1270  13
   1   9  -7 351.686 37.8218  41
   1   9  -7 335.358 38.8296  33
  -1   9   7 347.882 37.8446  16
  -1  -9  -7 422.302 35.5437   1
   1   9   7 439.158 39.4858  13
   1  -9  -7 433.401 34.9191  19
  -1   9   7 369.082 38.2257  14
   1   9   7 289.717 32.8084  42
  -1  -9   7 341.582 33.9430  26
  -1  -9   7 361.225 32.0014  42
   1  -9   7 434.723 32.2528  37
   1   9   7 478.480 44.5348  36
  -1   9  -7 333.183 40.1410  23
   1   9  -7 397.520 36.6557  19
   1   9  -7 339.546 45.5433  34
  -1  -9  -7 425.149 39.8224  39
   1   9   7 443.977 37.4833  35
  -1   9  -7 336.444 36.1141  19
  -1  -9  -7 379.617 33.8485  19
  -1   9  -7 295.799 39.6889  33
   1  -9   7 405.817 32.3431  20
  -1  -9   7 354.791 34.1398  21
  -1   9   7 442.116 38.1315  35
  -1   9  -7 329.390 39.4393  41
   1   9   7 383.414 37.8183  16
  -1  -9   7 382.056 34.4164  20
  -1  -9  -7 493.354 50.1845  29
   1   9  -7 310.648 36.6288   1
   1  -9  -7 505.735 47.7096  29
   1  -9  -7 545.051 46.1216  28
  -1  -9  -7 328.592 41.0709  40
   1   9   7 342.012 34.5078  37
   1   9   7 341.631 37.0713  14
   1   9  -7 381.523 35.5624   9
  -1   9   7 367.024 47.4493  36
  -1  -9  -7 481.267 36.8287  12
  -1  -9   8 69.9760 18.1252  26
   1   9   8 115.341 23.5634  13
  -1  -9   8 108.073 18.9289  20
   1  -9  -8 147.399 37.7043  29
  -1   9  -8 92.6671 26.8524  23
  -1  -9  -8 129.376 36.9821  28
  -1   9  -8 93.7416 24.4173  41
   1  -9   8 108.360 15.5934  37
  -1   9   8 3.50348 21.8564  14
   1   9   8 73.6527 16.1124  42
  -1   9   8 3.52121 23.0879  16
  -1   9  -8 68.0398 20.5097  19
  -1  -9  -8 62.9867 27.3765  39
  -1   9   8 108.671 21.9168  35
  -1   9   8 79.6246 23.5407  13
  -1   9  -8 94.5929 34.3093  34
   1   9  -8 84.2719 24.5024  19
   1  -9  -8 58.4225 33.9065  28
  -1  -9  -8 140.520 19.3485  19
   1  -9   8 83.2709 15.0994  20
   1   9   8 91.2864 21.7151  14
   1  -9  -8 86.1166 28.5665  40
   1   9   8 101.263 19.2709  37
   1  -9   8 71.8569 14.0377  42
  -1  -9  -8 59.3426 29.8430  40
   1   9   8 148.898 30.7417  36
   1   9  -8 91.2885 23.2636  41
   1   9   8 127.428 21.1029  35
  -1  -9   8 63.4121 17.7453  21
  -1  -9   8 96.7976 15.6668  42
  -1   9   8 108.197 39.5218  36
  -1  -9  -8 139.771 40.8130  29
   1   9   8 71.7260 21.2881  16
  -1  -9  -9 168.560 22.2958  19
  -1  -9   9 142.406 19.2863  42
   1   9  -9 144.680 27.6116  41
  -1  -9  -9 211.793 44.2373  29
   1  -9   9 160.737 19.2939  37
  -1   9  -9 156.340 30.6570  23
  -1   9   9 3.63184 25.0896  14
  -1   9  -9 106.224 26.0758  19
   1   9   9 205.859 27.5082  13
  -1   9   9 64.7746 24.2963  37
  -1   9   9 143.923 28.2285  13
   1   9   9 173.773 25.7889  16
   1   9   9 138.287 22.8022  37
   1   9   9 164.278 25.6812  14
  -1  -9   9 185.741 22.7805  20
   1  -9   9 151.142 19.7565  20
  -1   9   9 4.86659 26.6830  16
   1   9   9 186.545 33.6224  36
  -1   9  -9 147.258 30.4276  41
   1  -9  -9 238.557 41.3412  29
  -1  -9  -9 182.036 43.3647  28
  -1  -9  -9 122.933 32.7792  40
   1   9  -9 131.956 34.1182  34
   1   9   9 162.459 24.9317  35
   1  -9  -9 168.238 32.7595  40
  -1   9  -9 173.729 38.0586  34
   1   9  -9 138.913 28.0295  19
   1   9   9 131.146 19.6421  42
   1  -9  10 968.999 76.8596  42
   1   9  10 861.302 77.9354  42
   1  -9 -10 1246.86 92.2809  29
  -1  -9  10 1239.45 80.5488  20
   1  -9 -10 1227.88 89.4179  28
  -1   9 -10 817.215 83.1222  41
  -1   9  10 977.710 82.9147  37
  -1   9 -10 793.117 80.0428  19
   1   9  10 1041.53 80.8019  37
  -1   9 -10 867.415 83.1001  23
   1   9  10 1074.58 81.3688  35
  -1  -9  10 1118.59 77.9148  42
  -1  -9 -10 1130.01 80.6996  19
  -1   9  10 1133.74 82.0420  35
   1  -9  10 1069.59 77.8916  20
   1   9 -10 831.339 82.2498  23
  -1  -9 -10 1158.55 92.3864  29
   1   9 -10 797.629 82.6473  41
  -1  -9 -10 1126.52 86.4100  40
   1   9 -10 793.043 85.0491  34
   1   9 -10 923.826 81.8226  19
  -1  -9 -10 1120.83 90.5172  28
  -1   9 -10 867.725 86.4921  34
   1  -9 -10 1218.82 86.3182  40
   1   9  10 1474.05 90.5065  36
  -1   9  10 962.833 84.4055  13
   1  -9  10 1170.26 77.6987  37
  -1   9 -11 132.010 27.3760  19
  -1  -9  11 151.055 18.8579  42
   1  -9 -11 137.024 41.8976  29
  -1   9 -11 102.726 29.1020  41
  -1   9  11 141.635 28.5138  37
   1  -9 -11 116.457 28.6882  39
  -1  -9 -11 149.406 44.3408  29
   1  -9  11 144.265 18.7874  42
  -1   9  11 112.275 23.8402  35
  -1   9  11 95.6788 27.0722  13
   1  -9  11 164.999 18.8222  37
  -1   9 -11 122.796 34.7836  34
  -1  -9 -11 152.402 33.8560  40
   1  -9 -11 170.580 32.2731  40
   1   9 -11 84.2683 27.4187  41
  -1  -9 -11 141.913 42.0141  28
   1   9 -11 147.905 29.4165  19
   1  -9  11 140.413 19.8821  20
   1   9 -11 133.462 35.5379  34
   1  -9 -11 156.563 39.6810  28
   1   9  11 165.270 25.9541  35
  -1  -9 -11 155.116 26.8804  19
   1   9  11 125.606 23.5206  37
  -1  10   0 150.013 32.5571  32
  -1  10   0 193.100 24.9809  22
   1  10   0 186.412 22.2774  38
  -1  10   0 300.407 27.1384  15
   1 -10   0 258.482 21.9257  26
  -1  10   0 214.515 22.1353  27
   1  10   0 293.630 28.1813   6
   1  10   0 310.106 38.3730  24
  -1  10   0 182.869 28.6055  31
   1  10   0 248.939 26.5154  22
  -1  10   0 192.375 23.0894  38
  -1 -10   0 223.311 23.0222  26
  -1  10   0 300.874 21.4272  19
  -1  10   0 264.821 21.6262   6
   1 -10   0 268.251 22.0573  21
   1  10   0 211.495 32.7122  31
   1 -10   0 293.865 21.8800  44
  -1 -10   0 266.220 25.2297  39
  -1  10   0 204.762 29.2444  24
  -1 -10   0 267.260 21.5368   2
  -1 -10   0 307.612 23.2624  17
   1  10   0 213.540 22.0056  27
  -1 -10   0 224.339 23.1828  21
  -1 -10   0 277.986 21.8244  44
  -1  10   0 254.381 35.0181  30
   1  10   0 243.621 28.4179   4
   1  10   0 276.457 27.4310  15
   1 -10   1 234.520 18.7055  44
  -1 -10   1 208.782 17.8932   2
  -1 -10  -1 198.526 23.9169  39
  -1 -10   1 219.834 18.2980  44
   1 -10   1 194.810 20.1593  17
   1 -10   1 208.617 17.9564   2
  -1  10   1 178.592 23.5836  22
   1  10  -1 192.571 19.2596  27
  -1  10  -1 182.691 25.5488  31
   1  10   1 208.369 19.7097  36
   1 -10   1 224.510 19.2960  26
  -1  10   1 214.796 18.1759  19
   1  10   1 201.627 31.9996   6
   1  10  -1 179.942 26.6444   4
  -1 -10   1 219.211 21.5999  39
  -1  10  -1 128.504 20.2769  22
   1  10  -1 233.354 21.9588  22
  -1 -10   1 179.813 19.9194  26
   1  10  -1 142.482 26.4250  31
   1  10  -1 228.302 20.4035   6
  -1 -10  -1 205.306 19.8634  26
  -1  10   1 217.641 22.3001  15
  -1 -10  -1 217.039 17.9139  44
  -1  10   1 208.653 19.6150  36
  -1  10   1 197.684 20.0803   6
  -1  10  -1 147.236 19.1296  38
  -1  10   1 152.677 18.7036   8
   1  10  -1 193.813 16.3573   9
   1 -10  -1 207.863 18.1541   2
  -1  10   1 146.541 28.7340  32
  -1 -10  -1 192.956 18.3368   2
   1  10   1 202.599 35.2222  31
   1  10   1 169.772 21.1279  38
   1  10   1 192.228 30.1576  24
   1  10  -1 204.433 27.7641  15
  -1  10  -1 206.534 17.2320   6
   1  10  -1 318.448 44.7153  24
   1  10   1 181.449 24.2517   4
  -1  10   1 188.822 25.2453  24
   1  10   1 219.585 26.0776  22
   1 -10   1 197.021 19.0077  21
   1  10  -1 176.087 19.1359  38
  -1 -10   1 190.229 19.8547  21
  -1  10  -1 160.166 27.8400  24
   1  10   1 164.423 18.9033  27
   1 -10  -1 217.477 17.6047  44
  -1 -10  -1 222.171 18.7033  12
  -1 -10   1 210.716 20.4305  17
  -1 -10  -1 207.841 19.9858  21
  -1  10  -1 252.362 18.3696  19
  -1  10   1 181.245 19.2122  27
   1 -10   1 191.245 17.1093  20
   1  10   1 223.266 22.0385  15
  -1  10  -2 452.781 43.9812  38
   1 -10   2 602.769 43.2909  21
  -1 -10   2 599.945 42.5601  20
   1 -10   2 610.374 44.1903  44
   1  10  -2 346.350 47.5752  31
  -1 -10  -2 673.350 43.5195  44
   1 -10   2 559.046 42.1516  20
  -1  10   2 486.175 44.1718  27
  -1  10   2 542.512 47.9299  13
  -1  10   2 383.448 49.7880  32
  -1  10   2 423.083 46.8072  24
  -1  10  -2 381.927 47.7569  31
  -1 -10   2 584.464 43.9808  39
   1 -10   2 624.934 43.4097  26
  -1 -10  -2 617.242 47.5224  39
   1  10   2 615.685 49.0294  14
   1  10  -2 647.807 53.3323  15
   1  10  -2 522.895 48.1275   4
  -1  10  -2 458.637 55.3219  33
   1 -10  -2 756.768 47.6131  39
  -1  10  -2 486.966 45.3140  22
  -1  10   2 429.039 46.0081  38
  -1  10  -2 637.187 43.2751  19
  -1 -10   2 589.267 46.2311  17
  -1  10   2 605.295 45.9260  15
  -1 -10   2 571.399 42.8665   2
   1  10   2 545.167 48.3776  16
  -1 -10   2 589.887 44.1755  21
  -1  10   2 529.901 44.7811  36
  -1 -10   2 589.573 44.1609  26
   1  10   2 540.784 47.8334   8
  -1 -10  -2 569.564 42.4086   1
   1 -10   2 503.962 45.2542  17
   1 -10   2 702.876 47.5506   7
   1  10   2 555.242 48.7841  24
   1  10  -2 605.656 42.4284   9
   1  10  -2 862.718 69.8448  24
  -1 -10  -2 658.835 49.8776  28
  -1  10   2 572.135 49.8912  22
   1  10   2 437.474 46.0438  38
   1  10   2 525.341 56.4773   6
   1  10   2 511.193 44.7045  36
   1 -10   2 555.660 43.3182   2
  -1 -10  -2 626.350 44.1265  21
   1  10  -2 572.294 58.4700  33
   1  10  -2 543.553 44.0255  27
  -1 -10  -2 663.493 44.2267  26
   1  10   2 672.232 53.9565  22
  -1  10   2 565.885 46.4532   6
   1  10  -2 658.451 46.1952  22
  -1  10   2 462.470 44.9585   8
  -1 -10   2 617.637 44.6682   7
   1 -10  -2 591.383 43.3828   2
  -1  10  -2 726.055 54.9413  15
   1  10   2 565.434 47.6681   4
   1  10  -3 35.2439 29.2045  33
  -1 -10   3 4.54426 8.32222  44
   1 -10   3 5.65698 13.0758   7
   1 -10   3-15.6998 10.2300  21
  -1  10   3 16.9862 10.4560  35
  -1  10   3 8.79593 12.2694  27
  -1 -10  -3-13.7975 19.0146  39
  -1  10   3-2.64890 15.5898  13
   1  10   3-2.39869 17.8529   8
   1 -10  -3 1.37549 6.79397   2
  -1 -10   3-1.63502 11.2155  26
  -1  10   3-4.32849 16.5136  24
  -1 -10  -3 0.76175 24.4557  28
   1 -10   3 1.55451 6.05159  37
   1 -10  -3 13.4151 18.4022  39
  -1  10   3-3.63427 12.8141  15
  -1  10  -3-17.3079 15.1607  31
  -1 -10   3 20.2877 11.3003   7
  -1 -10   3 19.9187 5.97526  42
   1 -10   3-0.31529 9.66571  26
   1  10   3 7.29347 17.2675  16
   1  10   3-2.99110 14.6427  13
  -1  10   3 5.80234 15.8355  16
  -1 -10   3 0.62113 9.55384  20
  -1  10  -3 2.70909 8.48165  19
  -1  10   3 4.50543 20.7013  22
  -1  10  -3 0.98350 22.4794  41
  -1  10  -3 5.03593 11.5436  22
   1 -10  -3 4.07746 7.25146  12
  -1  10   3 2.66122 12.3698   8
   1  10  -3 1.49537 6.70581   9
   1  10   3 16.1327 17.6541  14
   1  10   3 3.88765 17.2197  38
   1  10   3 7.17066 8.37742  37
  -1 -10  -3 3.09614 5.66448   1
  -1  10   3 0.82426 15.5106  14
   1  10   3-0.56883 10.3547  27
   1  10   3 0.67906 12.0319  36
   1 -10   3-0.51840 5.85955  42
   1  10   3 13.8602 26.6735  22
   1  10   3 5.46174 15.3000   4
   1  10  -3-21.9045 42.0791  34
  -1  10   3 12.1878 17.3690  38
  -1  10  -3-16.3368 38.3389  34
   1  10   3 3.69975 15.5007  24
   1 -10   3-1.85584 7.50874   2
  -1 -10  -3 2.81203 8.79379   2
  -1  10   3 11.1168 22.8504  32
   1 -10   3 3.98503 8.28706  20
  -1 -10  -3 0.52491 9.47680  12
   1  10  -3-5.32920 13.8574  31
  -1 -10   3 0.40745 11.4191  21
   1  10  -3 3.90959 14.9250  41
   1 -10  -3 0.84497 6.35303   1
  -1  10  -3-19.6463 32.9390  15
   1  10   4 59.8563 15.9077  24
  -1  10  -4 34.4376 27.6540  33
   1  10   4 40.7243 19.1680  16
  -1 -10  -4 50.9006 9.89794   1
  -1 -10   4 52.6716 13.2361  21
  -1  10  -4 1.04058 25.9195  41
  -1  10   4 62.9261 18.8105  16
   1 -10  -4 58.0618 11.0494   2
  -1  10   4 29.0329 15.0025  35
  -1  10   4 65.5253 25.6488  22
   1 -10   4 904.945 26.7152  20
  -1  10   4 42.1073 20.6938   8
   1  10  -4 45.8032 10.7799   9
   1 -10  -4 62.9284 26.2212  28
  -1 -10  -4 53.7550 12.8900   2
  -1  10  -4-92.7840 55.7849  34
   1  10   4 67.9197 25.3811  38
   1  10   4 49.6308 12.0971  37
   1  10  -4 36.8747 16.6327  41
  -1  10   4 59.1042 21.0364   6
   1 -10   4 564.721 22.1122  42
   1  10   4 49.1466 19.6849  14
   1  10   4 50.9617 17.4717   4
  -1 -10   4 41.6243 12.9425  26
  -1 -10   4 59.7033 11.4226  44
  -1  10   4 32.0742 17.9137  13
  -1 -10  -4 46.7873 29.0549  28
   1 -10   4 56.5986 14.0553  44
   1  10  -4 87.2924 37.0827  34
  -1 -10   4 47.2528 13.6660   7
   1  10  -4 37.0180 15.6117  31
  -1 -10   4 57.3539 15.7166  17
   1 -10   4 317.481 20.1945   2
  -1  10   4 38.6340 18.7804  14
  -1 -10   4 57.1280 12.2577  20
   1 -10   4 16.1492 17.6991   7
   1  10   4 48.6575 17.6127  36
  -1  10  -4 915.538 31.1428   1
   1  10   4 34.5333 35.0090  22
  -1  10  -4 43.2218 17.1659  31
   1  10   4 27.4897 13.8600  27
   1 -10  -4 52.3653 11.2586  12
  -1  10   4 43.1443 22.2177  38
   1  10  -4 26.0003 24.7734  33
   1 -10   4 36.6293 15.9796  17
   1  10   4 33.2011 13.6984  35
  -1  10  -4 990.968 30.4208  19
   1  10   4 85.0340 29.6897   8
  -1  10   4 52.5769 17.5861  24
  -1  10   4 38.1976 11.3745  37
  -1 -10  -4 36.5273 21.8777  39
  -1  10   4 39.9602 17.8510  36
  -1  10  -4 225.424 77.7114  15
   1  10   4 71.3017 18.1075  13
  -1  10  -4 23.5659 28.5361  23
   1  10   4 57.9335 32.4009   6
   1  10  -4 71.9530 13.1748   1
  -1 -10   4 38.3156 8.65289  42
  -1 -10  -4 59.4615 13.9715  12
   1 -10   5 414.147 33.9801  44
  -1 -10   5 401.232 32.7667  26
  -1  10  -5 362.729 60.1431  34
  -1  10   5 314.226 37.8821  16
  -1  10   5 402.347 41.3072   6
  -1  10   5 391.975 36.7772  24
  -1 -10   5 433.860 36.4782  17
   1 -10  -5 480.483 44.4502  28
  -1 -10   5 373.669 35.3206   7
  -1 -10  -5 358.658 40.6225  40
   1  10  -5 359.895 33.1544   1
  -1  10   5 263.145 32.3584  37
  -1 -10  -5 436.522 35.4510   2
   1  10   5 311.991 45.6084   6
   1 -10   5 423.790 36.3174  17
   1  10   5 537.300 37.1471  37
  -1 -10   5 360.821 32.5209  44
   1  10  -5 348.333 47.6347  34
  -1  10   5 362.619 38.0922  14
  -1  10  -5 375.548 33.3161  19
  -1  10   5 353.901 35.2949  35
  -1  10   5 336.018 42.5527   8
   1 -10   5 380.277 30.7780  42
  -1  10  -5 437.026 53.6118  15
   1  10   5 507.539 52.0365   8
   1  10   5 317.017 34.3178  24
  -1  10  -5 271.545 41.6342  33
   1  10  -5 426.321 33.3794  19
   1  10   5 362.462 37.8433  14
   1  10   5 385.322 48.1924  38
   1 -10  -5 418.295 32.8712  12
   1  10  -5 356.921 36.5229  41
   1  10  -5 279.330 40.3273  33
   1  10   5 353.578 37.5539  13
  -1 -10   5 377.211 32.7739  21
   1  10   5 387.752 39.7772  36
  -1 -10   5 406.292 32.4010  20
  -1  10  -5 345.539 40.4100  41
  -1 -10  -5 351.244 46.7988  28
   1 -10   5 408.625 31.7664  20
   1  10   5 734.654 67.3940  22
  -1 -10  -5 314.662 39.6263  39
   1 -10  -5 419.330 32.8059   2
   1 -10   5 344.335 30.3279  37
  -1 -10  -5 445.796 35.7292  12
  -1  10  -5 313.427 33.4429   1
   1  10   5 881.503 45.0496  27
  -1  10   5 287.914 38.9631  36
   1 -10   5 487.744 39.4252   7
   1  10  -5 371.553 32.8363   9
   1  10   5 385.856 38.6343  16
  -1 -10   5 357.029 30.4438  42
   1 -10  -6 82.3738 31.0314  28
   1 -10   6 93.3027 20.0188   7
   1  10  -6 76.5300 16.8808  19
   1 -10   6 57.1981 11.9497  20
  -1 -10   6 46.4117 14.5271  26
  -1  10   6 39.9395 20.1959  13
  -1 -10   6 43.9920 17.2359  17
  -1  10   6 31.0773 19.0677  16
  -1 -10  -6 63.1752 24.2347  39
   1  10   6 42.4538 17.8248  27
   1  10   6 51.7002 27.5191   6
  -1  10   6 46.9227 14.6724  37
   1  10  -6 68.6742 15.1410   9
  -1  10   6 59.7845 30.3370   8
  -1  10   6 70.2473 18.8068  35
  -1  10  -6 34.9100 25.0976  33
  -1 -10  -6 88.0959 15.3188   1
  -1 -10   6 64.8279 13.8736  20
   1 -10   6 69.8495 18.2614  17
  -1  10  -6 54.4418 22.8309  41
  -1  10  -6 83.8041 27.1881  23
   1  10  -6 28.9193 23.1112  33
  -1 -10   6 68.8498 11.2396  42
  -1 -10   6 50.8760 14.5569  21
   1 -10   6 57.5962 10.9752  37
   1  10   6 49.4476 18.6481  14
  -1  10  -6 49.3430 17.6705   1
   1 -10   6 62.5757 10.7653  42
   1  10   6 70.8820 20.1125  13
   1  10   6 38.4856 14.1607  37
   1 -10   6 86.4043 14.9239  44
  -1  10   6 50.3982 27.9766  36
  -1  10   6 66.8462 17.7401  24
   1  10   6 68.9565 30.4844  38
   1  10   6 57.7069 30.8282   8
  -1 -10   6 61.6431 15.9385   7
  -1  10   6 23.1792 18.7921  14
   1  10   6 42.5547 17.0726  35
  -1 -10  -6 59.9305 25.3206  40
  -1  10  -6 59.1975 16.8050  19
  -1 -10  -6 68.6538 13.2918  19
  -1  10  -6 68.1956 44.9380  34
   1  10  -6 96.0504 33.1252  34
  -1 -10  -6 74.3058 16.6222  12
  -1  10   6 61.7625 23.3148   6
  -1 -10  -6 71.4715 34.6750  28
  -1 -10  -6 53.4988 15.5516   2
   1  10   6 55.7832 19.5833  16
   1  10   7 32.6654 18.2489  35
  -1  10   7-10.5423 32.0810  36
  -1  10   7 19.6980 14.7739  37
  -1 -10  -7 21.6622 36.0214  28
  -1 -10   7 18.9657 14.4083  21
   1 -10  -7 14.6370 31.2397  28
   1  10   7 36.8734 19.3665  13
  -1 -10   7 52.4074 14.7494  20
  -1 -10   7 18.3458 14.2395  26
   1  10   7 56.2669 25.4117  36
  -1  10  -7 66.6303 24.9391  23
   1  10   7 19.5981 18.6959  16
  -1  10   7 18.9817 18.1748  16
   1 -10   7 31.5167 11.2463  37
   1  10   7 25.8012 16.1311  37
  -1 -10  -7 58.2896 27.5211  40
   1  10   7 15.1609 19.0696  14
   1  10  -7 23.4266 19.6519  41
  -1 -10  -7 37.8724 17.0668  12
  -1 -10   7 28.5469 11.2987  42
   1  10  -7 29.7630 18.2223  19
   1  10  -7 41.5457 23.3356  33
  -1  10   7 9.49627 19.0522  13
   1  10  -7 1.25663 31.8597  34
  -1 -10  -7 26.8076 26.0628  39
  -1  10  -7 10.0227 23.6776  33
   1 -10   7 14.4413 10.8851  42
  -1  10  -7 29.6820 39.0395  34
  -1  10   7 21.5395 18.6216  35
   1 -10   7 23.5479 11.3458  20
  -1  10   7 2.35993 18.0359  14
  -1  10  -7 15.5432 17.1162  19
  -1 -10  -7 43.4430 14.7663  19
   1  10  -8 5.72613 23.5593  33
   1  10   8-3.38204 18.7506  16
   1 -10   8 26.2585 12.8344  20
  -1 -10   8 34.2371 12.9703  42
  -1  10   8 30.0147 20.2632  13
   1 -10   8 13.9006 12.0748  37
  -1 -10   8 22.1324 15.8689  26
  -1  10  -8 14.4330 23.1353  41
   1  10   8 29.0373 27.8574  36
   1  10  -8 34.7357 21.0352  19
  -1 -10  -8 12.7300 15.8482  19
   1  10  -8 40.5211 21.2794  41
  -1 -10  -8 15.3185 28.8141  40
  -1  10  -8 17.5733 18.9088  19
   1 -10  -8 15.6840 33.3715  28
  -1  10   8 9.97141 20.3900  14
   1  10   8 25.1048 15.8493  37
  -1 -10  -8 24.8703 39.4369  29
  -1 -10   8 44.0631 16.5336  20
  -1 -10   8 8.10601 15.4555  21
  -1 -10  -8 10.3828 27.4965  39
   1  10   8 36.1239 19.4898  13
  -1  10   8 38.7559 19.8596  35
   1  10  -8 10.2887 32.4533  34
  -1  10  -8 11.3342 22.6322  33
   1  10   8 19.6093 18.3493  35
  -1  10   8 15.3655 38.3761  36
  -1  10  -8 25.0649 23.9014  23
  -1  10   8 20.0431 21.1469  16
   1  10   8 35.8867 20.2676  14
  -1 -10  -9 320.425 29.0739  19
  -1  10  -9 205.140 34.3277  23
   1 -10   9 257.146 25.9081  20
   1  10  -9 186.096 31.9004  19
  -1 -10  -9 343.448 48.5805  29
   1 -10  -9 302.411 48.4398  29
  -1 -10  -9 293.362 48.9496  28
   1 -10  -9 304.958 44.4826  28
   1  10  -9 207.269 33.1075  41
   1  10   9 288.384 33.2963  13
   1  10   9 242.240 29.0879  37
   1  10   9 289.126 31.0906  35
  -1  10   9 307.166 32.1828  35
  -1  10  -9 165.039 30.3370  19
  -1 -10   9 234.250 25.6743  42
  -1  10  -9 196.125 34.2080  41
  -1 -10   9 281.331 28.5364  20
   1 -10   9 253.987 25.4704  37
  -1  10   9 299.187 35.4300  13
  -1 -10  -9 286.851 39.2301  40
  -1 -10  -9 47.1750 35.1439  39
  -1  10  -9 273.923 45.8928  34
  -1  10   9 241.827 33.4084  14
   1  10   9 301.522 39.9889  36
   1  10   9 211.622 31.0524  16
  -1  10   9 264.648 33.9977  16
   1  10   9 251.359 31.4838  14
  -1 -10 -10-18.0994 44.7097  29
   1 -10 -10 28.3390 40.1447  29
  -1  10  10 17.0265 20.3573  37
   1 -10 -10-6.99270 29.0262  40
  -1 -10  10 11.0436 16.8538  20
  -1  10 -10-7.42266 22.6193  19
   1  10  10 4.43508 27.6927  36
   1  10 -10-2.60227 24.3740  41
  -1  10  10 19.1412 23.2430  13
  -1  10 -10-4.07845 26.0895  41
   1  10 -10-1.24857 23.8556  23
   1  10  10 5.38163 20.3507  16
  -1 -10  10 0.64111 14.7214  42
   1 -10  10 17.6026 14.2370  37
   1  10  10 13.5735 19.3483  35
  -1  10 -10-3.92593 25.1142  23
  -1 -10 -10 60.6700 41.0860  28
   1  10  10-9.64503 20.5075  14
   1  10 -10-16.0349 32.5124  34
  -1 -10 -10 35.2798 31.6222  40
  -1  10 -10 5.75423 33.1548  34
   1 -10  10-2.01055 14.2529  20
  -1 -10 -10 20.3845 19.5126  19
   1  10 -10 19.6951 24.4974  19
   1 -10  10 5.73193 13.0485  42
   1  10  10 14.3649 18.4894  37
   1 -10 -10 11.0095 27.8136  39
  -1  10 -11 13.2290 22.6065  19
  -1  10  11 13.8626 21.3180  37
  -1 -10 -11 14.6992 28.2310  40
   1 -10 -11 17.0974 27.9734  40
   1 -10 -11-4.00491 27.3556  39
   1 -10  11 0.60971 12.5482  42
   1  10 -11-2.58005 31.9836  34
  -1 -10  11 0.76241 15.7308  20
  -1  10 -11 16.4038 26.7561  41
  -1 -10  11 2.42174 13.7366  42
  -1  10  11 14.4845 22.6071  13
   1  10  11-18.5500 19.1371  37
   1 -10 -11 32.2200 39.1735  29
   1 -10 -11-16.8836 21.2458  19
   1 -10 -11 8.44102 37.9919  28
  -1  10  11 2.88882 19.7922  35
   1  10  11-14.2017 19.7086  35
   1  10 -11-12.6048 24.8951  19
   1 -10  11 3.26810 14.2066  20
  -1 -10 -11 11.0867 39.4458  29
  -1  10 -11-39.8862 34.5277  34
  -1 -10 -11 16.4305 21.9172  19
  -1 -10 -11-31.6612 41.0038  28
   1  10 -11-18.3315 24.6628  41
  -1  11   0 735.050 74.6911  31
   1  11   0 1119.95 83.2494  24
  -1 -11   0 953.339 69.1926  39
  -1  11   0 648.021 67.9752  38
   1  11   0 878.227 78.9624  31
   1  11   0 723.594 68.0333  38
   1  11   0 774.987 67.5221  27
  -1  11   0 1008.40 72.3092  15
   1  11   0 855.817 73.2957  16
   1  11   0 893.073 72.6355   4
   1 -11   0 919.235 67.1015  26
   1 -11   0 919.403 67.1933  21
   1  11   0 933.083 73.5161  14
   1  11   0 1032.10 71.9815   6
  -1 -11   0 889.628 67.0879   2
   1  11   0 998.469 71.9159  22
  -1  11   0 814.414 70.6589  22
   1 -11   0 1060.54 67.4309  44
  -1  11   0 1055.11 66.8478  19
  -1 -11   0 996.636 67.5397  44
  -1  11   0 961.075 67.1735   6
  -1  11   0 794.208 74.6677  24
   1 -11   0 856.666 67.9848  17
  -1 -11   0 899.390 66.8493  12
  -1  11   0 574.681 75.9777  32
   1  11   0 1010.40 71.0446  15
  -1 -11   0 1012.35 68.6050  17
  -1  11   1 5.16284 10.0456  36
  -1 -11  -1 5.74954 12.8160  21
  -1 -11   1 0.41413 13.0952  26
   1  11   1 42.7598 31.4899  31
  -1  11   1 30.5735 23.7150  31
   1  11  -1-28.1829 38.5452  24
  -1  11   1 11.6340 9.89355  27
   1  11  -1 13.3382 21.7132  15
   1  11   1 2.81260 15.2234  15
  -1 -11  -1-4.50053 17.3854  39
  -1  11   1-7.73966 28.7083  32
   1  11  -1 10.5535 9.81297  27
  -1 -11  -1 2.84504 8.15779  12
  -1 -11   1 7.46155 11.1355  17
   1 -11  -1 8.21938 16.8824  39
   1  11   1 1.70909 9.97647  27
  -1  11   1 20.5664 17.7973  13
  -1 -11   1-5.05033 15.0208  39
   1 -11   1-0.72873 11.7400  26
  -1 -11   1 3.56050 8.04710  44
  -1  11   1 5.70213 18.8698  24
  -1 -11   1 4.91148 7.01996   2
  -1  11  -1 5.46200 8.61926  19
  -1 -11  -1 7.00206 12.9464  26
   1  11   1 19.7562 22.8687  16
   1  11  -1-5.94596 22.5713   4
  -1 -11  -1 5.74865 7.45640   2
   1 -11  -1 12.2182 11.8364  21
   1  11   1 0.73969 12.8808  38
   1  11  -1 1.49261 12.6421  22
  -1  11   1 7.78726 11.1205   6
  -1 -11  -1 7.37751 6.38512  44
   1 -11   1 7.46674 8.50010  44
   1  11   1 16.9625 23.5028  14
   1 -11  -1 3.24706 5.93161   2
  -1  11   1 18.5515 15.4593  15
   1 -11  -1-4.90103 11.7547  26
   1  11   1-1.10116 10.2704  36
   1 -11   1 9.75861 11.8456  17
  -1  11  -1 26.2103 24.7746  24
   1  11  -1-4.51920 21.9038  31
   1  11   1 4.43421 18.3484   4
   1  11  -1 4.58122 9.92103  38
  -1  11  -1 16.0601 29.1248  33
  -1 -11   1-1.65055 13.1752  21
   1  11   1 13.8472 16.8846  13
  -1  11  -1 5.97831 10.4818  38
   1  11  -1-3.32827 43.6341  33
   1  11   1 20.4501 17.3828  22
   1 -11   1 4.35784 11.6580  21
   1  11   1 15.7787 24.4994  24
  -1 -11   1 3.11033 7.29084  12
   1 -11   1 10.3041 7.13282   2
  -1  11  -1 1.65412 12.7602  22
   1 -11  -1-1.21685 6.65321  44
  -1 -11   1 7.02149 8.54866  20
   1 -11   1 4.48691 8.00103  20
  -1  11   1 2.95767 8.64004  19
   1  11   1 14.4798 21.2801   6
  -1  11   2 643.712 60.0155   8
   1  11   2 744.508 72.1524   6
  -1 -11   2 828.394 61.3526  17
  -1  11   2 509.779 66.3041  32
   1  11   2 728.155 62.1732   8
  -1 -11  -2 1005.68 58.9003  44
   1 -11   2 753.798 57.2116  20
   1 -11  -2 917.091 62.6386  39
  -1  11   2 776.020 66.9610  31
   1  11   2 818.909 65.4493  16
  -1 -11   2 713.985 59.2741  26
   1 -11   2 794.915 58.1794  26
  -1 -11  -2 878.243 59.5144  26
   1  11  -2 809.785 62.2508  41
  -1  11  -2 714.779 71.1409  23
  -1  11   2 767.893 62.3503   6
  -1  11   2 705.511 59.8966  36
   1 -11   2 767.993 58.4527   2
  -1 -11   2 809.313 57.4752  20
  -1  11   2 691.500 64.0878  24
  -1 -11  -2 863.278 62.9981  39
   1  11   2 682.398 62.7674  38
   1  11  -2 835.423 67.4020  15
  -1  11  -2 1029.31 71.6171  15
  -1  11  -2 631.094 64.2599  31
  -1  11   2 663.503 64.9802  22
  -1  11   2 852.635 64.4177  16
  -1  11  -2 582.844 59.1100  38
   1  11   2 680.313 59.7484  36
  -1  11  -2 744.915 61.3855  22
   1 -11   2 814.413 58.2998  21
  -1  11   2 577.951 61.6758  38
   1 -11  -2 923.244 58.9211   2
   1  11  -2 952.953 81.4408  24
  -1 -11  -2 798.345 59.3177   2
   1  11  -2 716.183 59.0515  27
  -1 -11  -2 840.459 59.3207  12
  -1  11   2 881.231 64.4895  14
  -1 -11   2 692.294 59.1961  39
   1  11  -2 896.377 61.5639  22
  -1  11   2 622.079 59.3702  27
   1  11   2 760.562 63.4065   4
   1 -11   2 1067.00 63.8054   7
  -1 -11   2 693.439 59.0759  21
   1  11   2 862.195 77.4454  31
  -1  11   2 749.328 60.7848  15
   1  11   2 828.537 65.3856  14
  -1 -11   2 909.620 59.8963   7
   1  11  -2 784.087 74.9859  33
  -1 -11  -2 745.352 57.2237   1
  -1  11  -2 606.070 72.7856  33
  -1  11  -2 830.637 58.2976  19
   1 -11   2 880.927 59.7075  44
  -1 -11   2 795.926 57.9546   2
   1  11   2 742.923 64.9410  24
   1  11  -2 660.402 63.1931  31
   1 -11   2 842.122 61.7140  17
  -1  11   2 738.907 63.9345  13
  -1 -11  -2 866.956 59.5178  21
   1  11   2 893.646 69.3703  22
  -1 -11   3 1.82371 12.4909  21
  -1 -11   3 2.84210 9.33005  44
   1 -11  -3-2.34070 7.76166  12
   1  11  -3 9.82463 16.8557  41
  -1  11   3 12.8001 19.8899  38
  -1 -11  -3-2.08077 6.05833   1
  -1  11   3 6.17223 13.7298  15
  -1  11   3-6.37039 18.4491   6
  -1  11  -3-9.72825 39.0506  15
  -1  11  -3 12.0406 31.7209  23
  -1 -11  -3 10.2596 24.9162  28
  -1  11   3 6.12473 17.2197  13
   1  11  -3 0.88292 16.9168  31
  -1 -11  -3 13.0935 10.5387   2
   1  11   3-0.95295 20.0356  14
  -1 -11   3 1.29479 10.8170   7
   1 -11   3-7.90218 14.7833   7
   1 -11   3-6.60749 8.76932   2
   1  11   3-17.1357 31.5432   6
   1  11  -3-17.6658 31.4760  33
  -1 -11  -3-2.06003 20.9130  39
   1  11   3 13.2711 21.5219   8
   1 -11   3-1.09018 10.5982  26
   1  11   3 12.4472 20.3277  16
  -1  11   3 6.99463 19.1169  16
  -1  11  -3 2.39568 27.2066  41
   1 -11   3 11.4820 9.27862  44
  -1  11   3-1.52934 13.7110  36
   1  11   3 0.87747 17.5666  24
   1 -11   3-0.50133 6.47505  37
  -1 -11   3-2.28691 12.6390  26
  -1  11  -3-5.68657 12.6999  22
   1  11   3 22.8736 21.6519  38
   1  11   3 16.4913 17.6100  13
   1  11   3 9.06168 15.9990   4
  -1  11   3-6.26762 13.6364  27
   1  11   3 6.82884 12.8974  36
  -1  11   3 9.93549 18.6380  14
  -1 -11   3 6.21018 9.65568  20
   1 -11  -3 14.3000 20.1465  39
   1 -11   3 0.74938 15.5807  17
   1  11   3 1.57313 28.4430  22
  -1  11   3 14.9739 15.0765   8
  -1  11   3 2.97152 10.5281  35
  -1 -11   3 1.89852 5.90406  42
  -1  11   3 9.73388 25.0584  22
   1 -11  -3 10.5996 6.94048   2
   1 -11   3 22.3739 9.81268  20
   1 -11   3-6.19869 6.51298  42
  -1  11  -3-0.42989 10.3150  19
   1 -11   3-5.79051 11.1192  21
  -1  11   3 18.4723 27.7067  32
  -1  11  -3 2.11614 16.7595  31
  -1  11  -3-18.5314 33.3114  33
   1  11   3-4.03728 11.5873  27
  -1 -11  -3 11.2681 10.1002  12
   1 -11   4 473.928 42.3807  37
  -1  11   4 1250.80 60.7861  13
   1  11  -4 551.225 64.1625  34
  -1  11   4 2431.74 71.1501  14
  -1  11  -4 380.598 69.8058  34
   1  11   4 387.557 45.0904  35
   1 -11   4 712.617 51.5098   7
   1 -11   4 533.734 44.7085   2
   1 -11  -4 563.191 44.8644   2
   1  11   4 725.653 66.0738  22
  -1 -11   4 678.657 49.1456  17
  -1  11   4 787.971 59.3921   8
  -1  11   4 759.527 58.1299  24
  -1  11   4 1603.03 69.1433   6
   1  11   4 461.646 46.8565  27
   1  11   4 523.172 48.2184  24
  -1  11   4 2409.49 72.3905  16
   1 -11   4 570.247 43.1395  42
   1  11   4 533.888 55.5207  38
   1  11  -4 467.269 58.6207  15
  -1  11  -4 641.890 66.9640  15
  -1 -11   4 491.353 42.5070  42
   1 -11   4 657.262 49.6881  17
  -1 -11  -4 580.360 46.4852   2
  -1 -11   4 561.631 45.4909  26
   1 -11   4 602.143 46.3688  44
  -1  11  -4 535.582 45.0251  19
  -1  11   4 1230.38 54.3002  35
  -1  11   4 1103.85 67.1356  38
  -1 -11  -4 597.396 46.6281  12
  -1 -11  -4 523.463 43.9710   1
   1 -11   4 573.090 43.8077  20
  -1  11   4 1708.30 76.1006  22
  -1  11   4 504.558 50.8761  36
   1  11   4 494.930 49.7567  13
  -1  11   4 388.209 44.3489  37
   1  11   4 439.429 44.3857  37
   1  11   4 494.021 48.4725  36
   1 -11  -4 1279.75 61.4066  39
   1 -11  -4 1805.41 72.5711  28
  -1 -11   4 575.845 45.6552  21
   1  11  -4 480.188 55.2911  33
  -1 -11   4 541.283 44.1069  20
  -1  11  -4 391.837 48.2985  31
  -1 -11   4 608.932 47.4716   7
   1  11   4 593.034 58.0174   8
   1  11   4 507.244 58.9655   6
  -1  11  -4 438.639 58.1526  33
   1 -11  -4 544.192 44.8981  12
   1  11  -4 522.855 49.0993  41
  -1  11  -4 468.955 53.8940  41
  -1 -11  -4 575.361 56.4831  28
   1  11  -4 424.211 47.3785  31
  -1  11  -4 495.152 57.5308  23
  -1 -11   4 591.538 45.5716  44
  -1  11   5 2.30961 20.2217  14
  -1 -11  -5 16.6846 13.4359   2
  -1 -11   5-1.63439 12.9348   7
  -1 -11   5 16.1531 11.0292  44
  -1  11  -5 23.6419 26.3940  41
  -1 -11  -5 14.0492 25.1633  39
   1 -11  -5 24.5323 10.8608  12
   1 -11   5 14.6624 8.37784  42
  -1  11  -5-2.97606 28.7283  33
   1  11   5 9.19093 31.1332   8
   1  11  -5-10.8324 40.2904  34
   1  11   5 1.09506 19.1089  36
  -1  11  -5 19.9379 42.4530  15
  -1 -11   5 21.0336 16.0873  17
  -1 -11   5 7.29319 7.83861  42
   1 -11  -5-31.6874 31.6465  28
   1  11   5 0.83816 15.7141  27
  -1  11   5 8.51467 10.6855  37
   1  11  -5 6.17559 38.2329  15
  -1  11   5 16.5461 26.2310   6
  -1  11  -5-2.58605 13.1009   1
   1 -11   5 28.6642 13.3360  44
   1  11   5 16.6639 11.7432  37
  -1 -11   5-1.62813 12.0583  26
  -1  11   5 12.9600 15.8060  24
   1  11   5 12.7143 19.1695  14
   1 -11   5-1.03036 18.3935   7
   1  11   5 14.9104 19.3328  16
   1  11   5 48.8486 39.9605  22
  -1  11   5 30.2027 20.7338  16
   1  11   5 32.1401 29.2080   6
  -1 -11  -5 1.11939 9.61022   1
   1 -11  -5 41.7646 25.2037  39
   1 -11  -5 10.1425 10.7564   2
  -1  11   5-3.63585 21.7410  36
   1  11   5-7.84897 14.2087  24
   1  11   5-7.84103 28.0784  38
  -1  11  -5 26.2739 53.7440  34
  -1 -11   5 8.66157 11.8280  21
  -1  11   5 12.3788 19.4490  13
  -1  11   5 0.78474 16.0203  35
   1  11   5 21.5074 17.8746  13
  -1 -11   5 18.8878 11.2004  20
   1  11   5 0.79782 17.1348  35
  -1  11  -5 11.4399 12.8043  19
   1  11  -5-7.34117 19.8429  41
   1 -11   5 4.11272 9.99398  20
   1 -11   5 17.3783 8.54608  37
   1  11  -5 10.9272 25.3471  33
  -1 -11  -5 19.1572 33.4924  28
  -1  11   5 7.04984 29.2808   8
   1 -11   5 31.9171 17.4922  17
  -1 -11  -5 7.31532 13.4411  12
  -1  11  -5 5.74660 27.4118  23
  -1  11  -6 351.952 45.9006  33
   1  11  -6 392.539 52.8472  15
   1  11  -6 355.938 40.6049  41
   1  11   6 358.492 40.6329  14
  -1 -11   6 392.232 33.2473  42
  -1  11  -6 367.047 44.1313  41
   1 -11   6 425.704 34.1963  20
   1  11   6 369.566 39.1665  27
   1  11   6 342.095 36.3147  37
   1 -11   6 543.837 38.0457  44
   1 -11   6 553.314 41.4444  17
  -1 -11   6 398.929 35.5558  26
  -1  11   6 403.287 47.6275  36
  -1 -11   6 426.960 35.3726  20
  -1  11   6 300.211 35.6246  37
  -1 -11  -6 423.948 43.8306  39
  -1  11  -6 365.560 61.7409  34
   1  11  -6 434.771 36.7238  19
  -1 -11   6 473.305 40.0908  17
   1 -11   6 412.617 33.1643  37
  -1  11  -6 414.852 47.7121  23
   1  11   6 367.980 40.6023  13
   1  11  -6 440.162 52.1186  34
   1  11   6 402.115 41.7777  16
  -1 -11   6 445.387 35.9086  21
  -1 -11  -6 421.067 36.1268   1
  -1 -11  -6 533.500 39.4164  12
  -1 -11  -6 491.349 52.7780  28
   1  11  -6 336.554 43.3961  33
   1 -11   6 394.063 33.4220  42
  -1 -11  -6 471.841 44.3251  40
   1 -11  -6 596.986 51.0671  28
  -1  11  -6 366.946 36.6437  19
  -1  11   6 455.295 39.8579  35
   1  11   6 473.949 51.3026  38
  -1  11   6 455.275 40.3190  24
   1  11   7 15.3554 14.7989  37
  -1  11  -7-7.00296 25.4923  23
   1 -11   7 11.4028 18.9790  17
  -1 -11  -7 5.50223 27.1398  40
  -1  11  -7 13.6082 16.8817  19
   1 -11   7 21.8590 10.5906  42
  -1 -11   7 27.3032 15.7967  21
  -1  11   7 2.58448 21.2521  14
  -1 -11   7 12.9932 15.2376  26
   1  11   7-5.85671 23.7384  36
   1  11   7 1.18724 19.6818  16
   1 -11   7-0.46920 10.3070  37
  -1 -11   7 9.62562 14.4234  20
  -1 -11  -7-11.9346 27.7957  39
   1  11   7-3.76931 19.3789  13
   1  11   7-2.36167 20.4829  14
  -1  11   7-63.2628 39.0237  36
   1  11  -7 9.79427 24.4436  33
  -1 -11   7 5.61396 11.2985  42
   1  11  -7-1.33327 34.7925  34
  -1  11   7-15.2491 22.0980  35
   1 -11  -7 23.5421 32.9111  28
  -1 -11  -7 9.01637 17.1077  12
  -1  11   7 3.68987 16.1745  37
   1  11  -7 8.84868 35.5665  15
   1  11   7-8.08226 17.8696  35
   1 -11   7-3.76369 11.9554  20
  -1 -11  -7 2.57008 14.3638  19
  -1  11  -7-62.9996 44.3511  34
   1  11  -7-16.9480 18.8076  19
  -1  11  -7 5.53343 24.6784  33
  -1  11   7 10.0697 20.6115  13
  -1 -11  -7-2.71931 35.4811  28
  -1  11   7 18.1892 21.5804  16
  -1  11  -7-9.29359 23.5633  41
  -1  11   8 195.956 29.1387  14
  -1 -11  -8 269.295 37.1152  40
  -1  11   8 196.456 30.9485  13
   1 -11  -8 55.1139 41.2309  28
   1  11   8 23.9320 28.6388  14
   1  11   8 26.4627 29.5136  16
  -1 -11  -8 12.8735 45.9880  28
  -1  11   8 212.150 27.9709  35
   1 -11   8 207.804 21.6001  20
   1  11   8 258.023 28.1093  35
   1  11  -8 170.740 30.0570  41
  -1  11  -8 161.613 32.0826  33
  -1 -11   8 166.414 24.3843  26
  -1  11  -8 165.877 25.8516  19
  -1  11  -8 198.241 32.6108  23
   1 -11   8 248.769 21.7762  37
   1  11  -8 138.762 30.9968  33
  -1  11  -8 138.547 44.6199  34
  -1 -11   8 177.675 20.9857  42
   1  11  -8 226.080 27.7637  19
   1 -11  -8 295.015 35.6733  39
   1  11  -8 227.111 42.4625  34
   1  11   8 181.588 29.4825  13
  -1 -11   8 188.146 25.1294  21
  -1 -11  -8 77.8527 35.0212  39
  -1  11   8 150.044 29.3225  16
   1  11   8 322.229 39.0433  36
  -1 -11   8 260.777 25.1905  20
  -1  11   8 136.849 25.7011  37
   1  11   8 171.902 24.6300  37
  -1  11   8 211.405 45.8371  36
  -1 -11  -8 227.925 24.3451  19
  -1 -11  -9-66.7203 45.5751  29
  -1  11  -9-4.76336 37.6963  34
  -1 -11   9 15.6338 13.6708  42
  -1  11   9 10.5715 21.9046  14
   1 -11  -9 36.8769 38.3453  28
  -1  11  -9-18.1512 25.6608  41
   1 -11   9 7.14928 14.7779  20
  -1  11  -9-1.39580 25.8989  23
   1 -11  -9 14.5408 17.0676  19
   1  11   9 1.95146 16.8322  37
   1  11   9 7.12052 21.1340  16
   1 -11   9 7.02585 14.0342  37
   1 -11  -9-21.3029 28.1494  39
   1  11  -9-13.2624 23.1275  41
   1  11  -9-30.4064 36.6369  34
  -1 -11   9-9.85500 17.2366  20
   1  11   9 4.72433 20.5595  14
   1  11   9 20.8072 29.9312  36
  -1  11   9-8.78675 23.4952  13
   1  11   9 5.09496 21.0304  13
   1  11   9-6.49781 19.9673  35
  -1  11   9 6.52557 19.5334  35
   1  11  -9 21.0321 25.9921  23
  -1 -11  -9 19.4853 29.2455  40
  -1 -11  -9-7.51428 17.3348  19
  -1 -11  -9 15.4978 29.5128  39
   1  11  -9-4.43777 22.0055  19
  -1  11  -9-0.89859 21.5997  19
  -1  11   9 2.65568 21.8799  16
  -1  11 -10 133.658 31.8363  41
   1 -11 -10 198.695 25.1070  19
  -1  11 -10 100.325 26.7261  19
   1  11 -10 99.5205 30.3067  41
  -1  11 -10 157.332 31.1222  23
   1  11  10 188.448 27.4207  16
  -1 -11 -10 213.970 46.6747  29
   1 -11  10 201.248 21.2284  37
   1 -11 -10 200.277 45.0332  28
   1  11  10 152.821 26.8351  14
   1  11 -10 143.690 28.5005  19
   1  11 -10 159.733 31.0052  23
  -1  11  10 150.350 26.5843  35
  -1  11  10 137.971 30.1495  13
  -1 -11 -10 132.795 24.2511  19
  -1 -11  10 176.852 21.2420  42
   1  11  10 166.826 24.8981  37
  -1 -11 -10 180.659 45.1137  28
  -1 -11  10 157.381 23.0808  20
   1 -11  10 172.534 21.8775  20
   1  11  10 168.482 26.4062  35
  -1  11  10 145.709 27.0832  37
   1 -11  10 159.909 19.9980  42
  -1 -11 -10 187.156 35.8207  40
   1  11  10 201.725 36.5280  36
   1 -11 -10 206.037 34.2451  39
  -1 -11 -11 1.20049 39.7989  28
  -1 -11  11 8.76645 16.3112  20
  -1  11 -11-1.18872 24.6832  23
   1 -11 -11 15.8023 38.4441  28
   1 -11  11 7.63221 14.1390  20
   1  11 -11 1.22484 25.6565  41
  -1  11 -11 22.3326 25.8274  41
   1 -11  11-4.71904 13.0990  42
   1  11 -11 20.3776 24.2971  19
  -1 -11  11-0.57877 13.7811  42
  -1 -11 -11 11.1966 19.9590  19
   1  11 -11-13.9262 33.5596  34
   1  11  11-0.87219 17.2464  37
  -1 -11 -11-2.13337 28.2320  40
  -1 -11 -11 8.05793 39.2630  29
   1 -11 -11-9.03991 18.6612  19
  -1  11  11 3.97593 19.3519  37
   1  11  11-3.66733 19.1573  35
  -1  11 -11-1.30683 32.5717  34
  -1  11  11 8.24037 21.2844  13
   1 -11 -11-11.9773 26.7193  39
  -1  11 -11 0.84339 22.1484  19
   1 -12   0 59.8101 10.5180  44
  -1  12   0 44.6387 27.1275  31
   1 -12   0 36.6443 9.32127   2
   1  12   0 44.8357 16.4952   6
  -1 -12   0 48.1685 13.2514  17
   1 -12   0 57.1939 13.9099  17
  -1  12   0 44.4479 18.5704  22
   1  12   0 33.8271 33.5548  24
   1 -12   0 60.1103 15.0203  26
   1  12   0 35.9008 14.5210  38
   1  12   0 47.2582 21.9158  15
   1  12   0 35.2848 23.6182   4
   1  12   0 59.5250 29.3795  14
  -1 -12   0 50.0724 10.0029  44
   1  12   0 22.1470 31.0730  31
  -1  12   0 41.3571 27.9462  24
   1  12   0 50.3928 19.1519  22
  -1  12   0 51.5913 15.0801  38
  -1  12   0 15.9568 36.7794  32
  -1  12   0 50.8761 22.0212  15
   1 -12   0 55.0407 15.0117  21
  -1  12   0 44.6281 10.9402   6
  -1 -12   0 39.3465 10.8007  12
   1  12   0 54.6382 29.2524  16
  -1 -12   0 46.3276 10.1752   2
  -1 -12   0 52.5356 18.8919  39
  -1 -12   0 51.9866 10.5390  20
   1  12   0 59.1852 13.2191  27
  -1  12   0 68.3760 11.7568  19
   1  12   1 24.0779 19.2628  13
   1 -12   1-2.56289 13.2213  26
  -1 -12  -1-1.92317 20.6459  39
   1 -12   1 7.74192 9.11375  44
  -1  12   1 1.69784 17.7608  15
   1 -12   1-0.70402 13.3090  17
  -1 -12   1 13.2153 13.0484  17
   1  12   1-2.09851 21.2881   4
   1  12   1-9.19884 12.8664  27
   1  12  -1 7.30206 44.2903  33
   1  12  -1 2.06333 11.4246  38
  -1  12   1 11.4895 24.1804  24
   1  12   1-1.07496 27.4179  14
  -1  12   1 1.96331 11.5150  36
   1 -12  -1 5.70200 13.6075  26
   1  12  -1 6.57425 24.6650  31
  -1  12  -1-35.3895 33.0899  24
   1 -12   1 0.65900 9.49914  20
  -1  12  -1-0.76124 12.0586  38
   1 -12  -1-5.21214 14.3466  21
   1  12  -1-27.8715 40.9968  24
  -1  12   1 8.45649 21.5875  13
  -1 -12   1 6.30318 10.0122  20
   1  12  -1-11.5744 12.5915  27
  -1  12  -1 2.10271 9.93768  19
  -1 -12   1-4.00546 8.32906  44
  -1 -12  -1-9.49405 9.68080   2
  -1 -12  -1 8.23597 9.17479  12
   1  12   1 1.77008 15.6806  38
   1 -12   1 6.77684 7.74233   2
   1  12   1 10.7271 11.8744  36
   1 -12   1-2.98012 12.9818  21
  -1  12   1-0.42447 10.8460  19
   1  12   1-15.0839 38.2533  31
   1  12   1-10.8126 27.6017  16
  -1  12   1 7.47517 12.2879  27
  -1  12   1-16.0275 17.3277  38
   1 -12  -1-2.63738 7.91085   2
  -1 -12  -1 2.91463 15.1966  26
  -1 -12   1 8.64457 14.9236  21
  -1  12   1 22.4240 12.7676   6
  -1 -12   1 4.11739 8.27648   2
   1  12  -1 6.99842 14.7575  22
  -1 -12   1 0.48199 15.0364  26
   1  12   1 17.7354 19.9833  22
   1 -12  -1-0.58525 19.4414  39
  -1  12  -1-4.98295 38.4728  33
  -1 -12   1 11.8942 8.51678  12
   1  12   1-7.91636 30.3124  24
  -1 -12  -1-2.42136 15.4987  21
  -1  12  -1 20.0424 15.2481  22
  -1 -12   1 0.52011 15.9424  39
   1  12   1 10.4457 16.9007  15
  -1  12   1-6.30237 35.1017  32
  -1 -12  -1 4.65911 7.47755  44
  -1  12   1-10.1653 32.0255  31
   1  12   1 8.74945 21.0168   6
   1  12  -1 27.2176 23.1117  15
  -1  12  -2 163.174 48.1682  33
  -1  12  -2 232.200 28.6997  22
  -1  12  -2 242.723 26.4851  38
  -1  12  -2 344.862 44.4537  15
  -1  12   2 205.957 31.3018  38
  -1 -12  -2 341.382 26.9407  12
  -1  12  -2 185.839 33.4693  31
  -1 -12  -2 300.832 24.5850  44
  -1 -12  -2 279.689 23.3852   1
  -1 -12  -2 313.251 33.8992  39
  -1  12   2 297.401 31.0006   6
   1 -12  -2 304.505 34.0070  39
  -1  12   2 254.754 27.8837  27
   1  12   2 303.060 37.1781  14
   1  12   2 256.840 40.7453   6
  -1 -12   2 332.536 25.1546   2
  -1 -12   2 235.106 27.7151  21
   1  12   2 268.399 31.6376  38
  -1  12   2 195.259 26.6626   8
  -1  12   2 344.172 35.4926  16
   1 -12  -2 306.413 25.1609   2
   1 -12   2 305.191 25.9643  44
  -1  12  -2 202.051 49.6766  23
  -1  12  -2 293.025 25.3940  19
   1  12   2 299.102 37.2823  16
  -1  12   2 246.238 27.3639  36
  -1 -12   2 206.474 27.4883  26
   1  12  -2 283.283 26.6090  27
  -1 -12  -2 325.264 28.0706  21
   1  12  -2 270.186 34.0919  31
  -1 -12  -2 303.793 26.3499   2
  -1  12   2 228.069 33.3104  13
   1  12  -2 340.380 56.5909  24
  -1  12   2 241.804 36.1735  22
  -1 -12  -2 304.515 27.9786  26
   1  12  -2 274.488 51.0754  33
   1  12   2 308.085 33.4996   4
   1  12   2 286.227 28.0556  36
   1  12   2 294.649 36.0153  24
  -1  12   2 238.576 39.5927  31
   1  12   2 275.169 53.9735  31
  -1 -12   2 300.415 24.6080  20
   1  12  -2 288.594 28.7357  22
  -1  12   2 246.704 34.1925  24
   1 -12   2 276.662 29.3605  17
  -1  12   2 306.857 29.9257  15
  -1  12   2 306.669 35.8618  14
  -1  12   2 263.197 44.7106  32
   1 -12   2 278.825 24.9736   2
   1  12  -2 293.170 38.9524  15
   1 -12   2 299.531 26.4301  21
   1  12   2 321.201 32.4692  13
   1 -12   2 308.565 26.4957  26
   1 -12   2 290.573 24.5885  20
  -1 -12   2 340.570 29.5020  17
  -1  12  -3 280.714 31.3719  22
  -1  12  -3 313.963 47.7825  41
   1  12  -3 321.035 35.3665  41
   1 -12   3 334.626 32.7267  17
  -1 -12  -3 405.327 37.8268  39
  -1  12   3 347.059 37.0217   6
   1 -12   3 348.288 26.1380  42
   1  12  -3 316.074 44.4239  15
   1 -12   3 329.230 27.1137  20
  -1  12   3 245.778 27.5645  35
  -1 -12   3 332.125 32.3434  17
   1  12   3 309.473 37.7325  16
  -1 -12   3 393.325 29.8205  44
  -1  12   3 305.803 37.2697  16
  -1 -12   3 322.681 29.5588  26
  -1 -12  -3 372.729 30.9659  26
  -1  12   3 263.772 43.4719  22
   1 -12  -3 365.151 28.3723  12
   1  12   3 319.092 35.4471   8
  -1  12  -3 351.625 28.6685  19
  -1  12   3 312.203 31.4729  15
   1  12   3 336.106 37.9314  14
   1 -12   3 441.805 34.8286   7
   1  12   3 266.399 34.2225   4
  -1 -12   3 328.230 29.5026   7
  -1  12   3 241.134 32.3891   8
   1 -12   3 328.154 28.3609  21
   1  12   3 297.428 38.2333  38
  -1 -12  -3 335.998 26.6080   1
  -1 -12  -3 312.627 29.2386   2
   1 -12   3 333.223 27.8691   2
   1 -12   3 387.945 30.2392  44
  -1  12  -3 206.610 50.6632  33
   1 -12   3 300.439 25.4698  37
  -1  12  -3 403.962 54.3050  15
  -1  12   3 239.768 38.0296  38
   1  12   3 294.528 47.4508   6
   1  12   3 296.523 31.5205  36
   1 -12  -3 385.261 28.7281   2
  -1 -12   3 323.190 29.5081  21
  -1 -12  -3 389.918 31.0073  21
  -1  12   3 279.790 35.8628  13
  -1  12  -3 185.537 32.8960  31
  -1 -12  -3 341.368 29.7790  12
  -1  12   3 261.818 36.4220  14
   1  12   3 241.499 29.7131  27
  -1 -12   3 331.693 27.6537  20
   1 -12  -3 362.473 37.3361  39
  -1  12  -3 90.8334 52.1724  23
  -1  12   3 273.982 31.7697  36
   1  12  -3 291.232 47.0980  33
   1  12   3 342.599 48.1932  22
  -1  12   3 227.217 31.4227  27
  -1 -12  -3 427.695 41.7451  28
   1  12   3 322.466 35.0438  24
  -1  12   3 267.797 46.2262  32
   1  12  -3 224.559 32.9993  31
   1 -12   3 325.323 28.4331  26
  -1 -12   3 314.617 25.5667  42
  -1  12  -4 32.5974 52.9911  34
   1 -12   4 36.4652 9.16941  42
  -1 -12  -4 41.6498 34.7170  28
   1 -12   4 69.9085 19.7188   7
  -1  12   4 11.8777 23.5527  27
  -1  12   4 47.6431 27.1030  14
   1 -12   4 33.5055 9.51283  37
  -1  12   4 49.8258 22.1381  24
   1  12   4 33.4381 18.2222  24
  -1  12  -4 44.6568 37.7190  23
   1  12   4 50.9505 23.3095  14
  -1  12   4 9.13462 36.6444  22
  -1 -12   4 34.5804 16.8725  17
  -1  12  -4 76.9966 32.3961  41
  -1 -12   4 55.0352 12.9543  20
  -1  12   4 19.6164 30.4774  38
  -1 -12  -4 59.6118 13.8640   2
   1  12   4 38.7406 17.7642  27
   1 -12   4 35.9196 11.5283  20
  -1 -12   4 43.4762 14.7003  26
   1 -12  -4 47.6998 10.7309   1
  -1  12  -4 105.816 49.3718  15
  -1  12  -4 52.3426 13.3091  19
   1  12  -4 34.7929 18.4531  31
   1  12   4 63.7540 38.6336  22
  -1  12   4 52.0918 16.3314  35
  -1  12   4 41.4591 26.7280  16
   1 -12   4 32.2042 11.3813   2
   1 -12   4 47.5230 17.7320  17
   1  12   4 41.8969 22.8530  16
   1 -12   4 55.5672 14.0975  44
   1  12   4 29.7377 12.0324  37
  -1 -12   4 41.8501 12.4332  44
  -1 -12  -4 36.0421 13.9067  12
  -1  12   4 19.0628 25.1011   8
   1  12   4 31.4951 19.3074   4
   1  12  -4 57.8972 21.9418  41
  -1 -12   4 40.1056 8.64371  42
   1  12   4 59.6502 18.6284  36
  -1 -12  -4 42.7857 9.96699   1
   1 -12  -4 48.6768 11.8607   2
  -1  12   4 30.7824 23.6844  13
   1 -12  -4 69.8474 27.6247  39
   1  12   4 26.4226 25.3215   8
   1  12   4 49.1113 20.5313  13
  -1 -12   4 51.0348 14.1583   7
   1  12  -4 45.4724 36.6247  15
  -1 -12   4 58.5357 14.8571  21
  -1  12  -4 11.8684 17.8729  31
   1 -12  -4 58.1204 12.5944  12
   1  12   4 55.3055 28.3003  38
  -1  12   5 86.1332 22.4799  24
  -1  12   5 82.4641 27.7803  36
   1  12  -5 56.1441 24.5418  41
   1  12   5 83.2629 23.4497  13
   1 -12  -5 145.923 17.3151  12
   1  12   5 182.706 48.8114  22
   1 -12  -5 106.182 36.8952  28
   1  12   5 87.1318 21.9249  27
  -1 -12   5 92.8021 17.5932  21
  -1  12   5 94.7436 26.4016  13
  -1 -12  -5 67.4681 30.1973  39
  -1 -12   5 132.639 17.2815  20
   1 -12   5 121.586 19.9315  44
  -1  12  -5 1190.39 88.4657  23
  -1  12   5 103.606 26.3768  16
  -1  12  -5 1745.62 101.095  15
   1 -12   5 115.453 15.1873  37
  -1 -12  -5 76.8061 38.4034  28
   1 -12   5 112.826 14.2932  42
   1 -12   5 113.495 16.9744  20
  -1  12   5 63.0102 19.9655  35
  -1  12   5 103.838 36.2863  38
   1 -12  -5 132.020 16.8116   2
  -1  12   5 104.327 26.8941  14
  -1 -12   5 128.312 22.1387  17
   1  12   5 94.4640 16.8285  37
   1  12  -5 87.6870 39.1800  15
   1 -12  -5 110.700 29.7841  39
  -1 -12  -5 110.818 15.8573   1
  -1  12  -5 2698.80 134.912  34
   1  12  -5 103.842 33.0506  33
   1  12   5 73.3276 24.1964  36
  -1 -12  -5 117.657 19.9194  12
   1 -12   5 244.966 32.6481  17
   1  12  -5 87.0730 43.7719  34
  -1  12  -5 542.552 43.0415  31
  -1 -12   5 131.309 18.1743  26
  -1  12  -5 79.6395 18.6397  19
   1  12   5 83.0798 20.8446  24
  -1 -12   5 134.689 17.6210  44
   1  12   5 104.764 37.5006  38
  -1  12  -5 1857.23 92.2786  33
   1 -12  -5 121.289 15.8813   1
  -1 -12   5 106.004 13.8920  42
  -1  12  -6 168.586 32.4045  41
  -1 -12  -6 115.101 20.4738  12
  -1 -12   6 114.472 22.0298  17
   1  12   6 74.8350 18.5670  37
  -1  12   6 109.069 22.2319  35
   1 -12   6 128.937 14.6638  42
   1 -12   6 143.487 24.4883  17
  -1 -12  -6 127.574 41.1617  28
   1 -12  -6 193.171 40.8974  28
   1 -12   6 110.618 15.9487  20
  -1 -12   6 119.483 18.3413  26
  -1  12   6 148.134 35.0598  36
   1 -12   6 123.224 14.8590  37
   1  12   6 158.497 39.4793  38
   1  12  -6 112.691 41.2105  34
   1  12   6 125.873 25.0670  27
  -1  12   6 102.525 27.1566  16
  -1 -12   6 144.469 19.0389  21
   1  12  -6 125.931 26.8795  41
  -1 -12  -6 84.8784 30.8171  39
   1 -12  -6 117.920 29.3307  39
   1  12   6 125.177 26.9925  36
   1  12   6 115.527 24.7903  16
  -1  12   6 73.5400 17.5128  37
   1  12   6 112.437 24.5736  14
  -1 -12   6 136.236 17.7425  20
  -1  12   6 92.1773 27.3304  14
   1  12   6 95.8503 23.9937  13
   1  12  -6 141.769 38.2172  15
  -1 -12   6 111.884 15.0623  42
  -1  12   6 142.517 23.3919  24
  -1  12  -6 174.113 56.1332  34
   1  12  -6 59.5807 28.6804  33
  -1  12  -6 107.990 19.7909  19
  -1  12  -6 72.5404 31.5617  33
   1  12  -7 371.441 51.9557  34
   1  12  -7 334.269 44.3747  33
   1 -12   7 593.404 41.3265  17
  -1  12   7 333.145 41.7820  13
  -1 -12   7 479.760 38.6793  17
   1  12   7 47.7565 40.8810  16
  -1 -12  -7 137.918 54.4866  28
   1 -12  -7 587.238 54.1129  28
  -1  12  -7 348.737 44.0146  33
  -1 -12   7 313.629 34.5145  21
  -1  12  -7 371.425 45.7578  23
  -1 -12   7 388.651 35.3777  26
  -1  12   7 358.655 52.5490  36
   1  12  -7 315.317 41.3048  41
  -1 -12  -7 424.983 34.4970  19
   1 -12  -7 358.487 35.3940  19
   1  12   7 357.249 39.8117  13
  -1  12   7 409.184 39.1410  35
   1  12  -7 358.165 48.1267  15
   1 -12   7 437.255 32.4901  37
   1  12   7 430.494 46.1071  36
   1 -12   7 393.122 32.3591  42
   1 -12   7 451.386 33.1636  20
  -1  12   7 286.255 34.9446  37
   1  12   7 367.076 36.2149  37
  -1  12  -7 374.814 61.1725  34
  -1 -12  -7 452.964 46.0040  39
  -1 -12   7 412.204 34.7047  20
   1  12   7 46.2151 40.8159  14
  -1 -12  -7 503.231 38.4625  12
  -1  12  -7 413.855 45.5125  41
  -1 -12   7 370.064 32.1339  42
  -1  12  -7 344.095 35.8567  19
  -1  12  -8-5.37577 43.4509  34
   1  12   8 61.7755 29.4267  36
   1  12  -8 10.6447 27.1563  33
   1 -12   8 51.2623 14.0723  37
  -1 -12  -8 34.1527 41.9254  28
   1 -12   8 26.1328 13.9918  20
  -1  12  -8 22.3824 28.2492  23
   1 -12  -8 40.9515 39.7775  28
   1 -12  -8 24.1110 29.9303  39
   1 -12  -8 35.5727 15.7524  19
   1  12   8 33.6664 21.6722  13
  -1  12  -8 17.2674 26.3247  41
  -1  12   8 22.9075 24.7962  16
  -1 -12   8 8.52849 17.5442  21
  -1 -12  -8 62.0119 31.4685  40
   1  12   8 47.6912 22.2229  14
  -1  12   8 33.9664 18.1479  37
  -1 -12  -8-26.0308 32.2850  39
   1  12   8 26.9581 17.3080  37
  -1 -12   8 31.9633 13.9691  42
  -1 -12  -8 45.1029 19.0888  12
  -1  12   8 98.7820 41.3272  36
  -1  12   8 43.0740 21.4657  35
   1  12   8 36.0177 20.1159  35
   1  12  -8 38.0501 20.8862  19
  -1  12  -8 31.6587 19.8617  19
   1  12  -8 61.3529 36.6099  34
  -1 -12   8 29.2823 17.6730  20
  -1 -12   8 24.0620 17.4141  26
   1  12   8 49.2258 23.0955  16
  -1  12  -8 18.9376 27.2888  33
  -1  12   8 37.1353 24.0190  13
  -1  12   8 19.9458 23.0594  14
  -1 -12  -8 18.4291 16.4668  19
  -1 -12  -9 89.4342 31.9999  39
  -1  12   9 79.0988 22.0369  35
   1  12  -9 58.7624 27.2292  23
   1  12   9 41.6202 30.2363  36
   1 -12  -9 115.817 43.4061  28
   1 -12  -9 95.6999 31.1677  39
  -1  12   9 58.6213 40.3025  36
  -1  12   9 67.2832 25.8168  14
   1  12   9 46.6831 23.6540  16
  -1  12   9 45.5280 26.1349  16
  -1 -12  -9 159.965 47.4435  28
  -1 -12  -9 6.00318 31.4003  40
   1  12   9 68.4848 23.5737  13
  -1  12  -9 53.2992 29.8286  23
   1  12  -9 104.723 36.9627  34
   1  12   9 50.1321 23.7520  14
   1 -12   9 42.7413 16.9895  20
   1  12  -9 58.5909 26.7775  41
  -1  12  -9 51.1044 23.2944  19
   1  12   9 5.70696 18.4278  37
   1 -12   9 71.1681 15.5050  37
  -1  12  -9 64.8816 38.2626  34
  -1  12   9 58.0334 24.6844  13
  -1 -12   9 36.7798 15.2959  42
  -1 -12   9 54.2187 19.1893  20
  -1  12   9 48.3935 21.7378  37
   1 -12  -9 75.4717 18.1331  19
  -1 -12  -9 52.1077 18.1352  19
   1  12   9 81.2037 23.1253  35
  -1  12 -10 50.1108 28.5133  41
   1  12  10-4.66920 17.3643  37
   1  12  10 36.2985 21.8310  14
   1  12 -10 19.0393 35.7729  34
   1 -12 -10-21.5493 40.3666  28
   1 -12  10 28.9938 15.8949  20
   1  12  10 11.0413 21.7619  16
   1  12 -10-1.31332 25.9032  23
   1 -12 -10 35.0729 30.0003  39
   1  12  10 33.3785 20.5753  35
  -1  12  10 1.35315 23.7279  13
  -1 -12  10 21.3645 14.5553  42
   1  12 -10 21.3878 24.9646  41
   1  12  10 9.26626 21.4078  13
  -1 -12 -10 30.8715 18.8983  19
  -1  12 -10 10.6106 21.8572  19
  -1  12  10 13.0684 20.9271  35
  -1 -12  10 46.5040 17.4553  20
   1  12  10 2.92662 28.9727  36
  -1 -12 -10-13.7907 41.7046  28
  -1  12 -10-16.2204 37.2614  34
   1 -12 -10 43.7831 18.1571  19
  -1  12 -10 12.0994 26.9907  23
   1 -12  10 36.6073 14.0978  42
  -1 -12 -10 7.93032 30.3908  40
  -1  13   0 13.3783 12.3886  19
   1 -13   0 8.32944 15.6851  21
   1  13   0-10.9258 34.2145  31
   1 -13   0 8.70483 8.61035   2
  -1 -13   0 3.09940 10.6072   2
  -1 -13   0 6.19877 12.5250  17
   1 -13   0 10.5022 9.39089  44
   1  13   0-1.20446 27.9592   4
  -1 -13   0-1.95278 19.7486  39
   1 -13   0 4.17834 15.7363  26
  -1 -13   0 6.93851 10.6214  12
   1  13   0 0.85322 13.8985  38
  -1  13   0 24.4621 36.9823  24
   1  13   0 56.4232 14.8012  27
  -1  13   0 2.46354 19.1328  22
  -1  13   0 14.9625 25.6182  15
   1  13   0 1.14543 20.1228  22
  -1 -13   0 3.48501 10.9073  20
   1  13   0-17.3841 34.7021  14
   1  13   0 14.4925 22.4811  15
  -1 -13   0 10.3223 10.4483  44
   1  13   0 10.5232 38.2116  24
   1 -13   0 1.43736 13.8396  17
  -1  13   0-8.62758 13.8158  38
   1  13   0-16.2389 34.7637  16
  -1  13   0-12.4356 33.8807  31
   1 -13   1 2124.43 145.480  26
  -1 -13   1 2149.71 146.230  26
   1 -13  -1 1920.24 145.228   2
   1 -13   1 2108.90 145.560   2
  -1 -13   1 2238.43 145.778   2
   1  13   1 1583.81 147.728  38
  -1  13   1 2150.19 147.099   6
  -1  13  -1 1760.97 159.821  24
  -1 -13  -1 2136.76 146.263  26
   1  13   1 2050.05 156.079  24
   1  13   1 2133.84 154.282  14
  -1  13   1 2108.68 149.972  15
  -1  13   1 1576.76 146.014  27
   1 -13  -1 2218.52 146.362  26
  -1  13  -1 2262.30 145.358  19
   1  13  -1 1640.25 153.009  31
  -1  13  -1 1440.20 146.252  38
   1  13  -1 2006.51 150.365  15
   1  13   1 1912.17 151.834   4
  -1  13  -1 2286.68 156.184  15
  -1  13   1 1511.15 147.998  38
  -1  13   1 1834.34 156.425  24
   1 -13   1 2187.97 145.577  21
   1  13   1 2229.22 151.696   6
  -1 -13  -1 2142.39 146.339  12
  -1 -13   1 2195.98 146.606  39
   1  13   1 1722.38 146.424  27
  -1  13   1 836.769 159.665  31
   1 -13  -1 2248.71 146.374  21
  -1 -13  -1 2532.27 146.252  44
  -1 -13  -1 2303.81 148.605  39
  -1 -13   1 2400.29 148.566  17
  -1 -13   1 2112.28 146.061  21
   1  13  -1 1634.73 146.076  38
  -1  13  -1 1659.86 159.363  33
  -1 -13  -1 2296.96 146.638   2
  -1 -13   1 2009.43 143.668  20
  -1 -13  -1 2225.21 146.470  21
   1  13   1 2058.02 153.756  16
   1 -13   1 2385.39 146.331  44
  -1  13   1 2019.84 154.353  13
   1  13  -1 1888.49 160.701  24
   1  13  -1 1864.30 146.283  27
  -1  13  -1 1106.80 148.668  22
   1  13   1 2270.41 148.207  15
  -1 -13   1 2289.66 146.414  44
   1 -13   1 1874.51 143.792  20
   1  13   1 2173.43 153.745  22
  -1 -13   1 2176.00 145.380  12
  -1  13   1 1449.22 156.862  32
   1  13  -1 1783.11 162.021  33
   1  13   1 2037.52 149.895  13
   1  13  -1 1941.79 149.181  22
   1  13   1 1904.78 146.459  36
   1 -13   1 2202.53 148.201  17
   1  13   1 1508.84 162.370  31
  -1  13   2 1322.59 130.490  27
  -1  13   2 1917.62 138.919  16
   1 -13   2 2129.92 134.029  17
   1 -13  -2 1913.96 130.979  26
   1  13   2 1523.77 134.273  38
   1  13   2 1710.40 137.825  24
  -1  13   2 1280.55 139.549  22
  -1  13  -2 1282.15 130.015  38
  -1 -13  -2 1923.68 130.749  21
   1 -13   2 1831.59 128.410  20
   1 -13   2 2158.47 131.343  44
   1  13   2 1771.60 138.373  14
  -1 -13  -2 2053.94 131.486   2
   1  13   2 1803.57 138.274  16
  -1  13   2 1235.19 133.978  38
  -1 -13   2 1898.13 130.269  26
   1 -13  -2 2193.59 134.259  39
  -1 -13  -2 2216.70 130.095  44
  -1 -13  -2 1721.32 128.125   1
   1 -13   2 1864.70 129.543  26
  -1  13   2 1552.01 142.298  31
  -1  13   2 1552.73 131.033  36
  -1  13   2 1729.11 137.319  13
  -1  13  -2 1326.11 147.535  33
   1  13   2 1603.71 131.201  36
  -1  13   2 1715.99 138.886  24
  -1  13   2 1747.65 133.670   6
   1  13  -2 1833.45 147.784  24
  -1  13  -2 1294.94 135.934  31
  -1  13  -2 1928.32 129.480  19
  -1 -13   2 1861.18 130.145  21
   1  13   2 1811.12 136.504   4
  -1  13   2 1708.11 132.790  15
  -1  13   2 1832.20 138.282  14
   1  13  -2 1525.80 145.376  33
   1 -13  -2 1959.17 130.185   2
   1  13   2 1773.40 134.512  13
   1 -13  -2 1811.45 129.624  12
   1  13  -2 1795.40 133.199  22
   1 -13   2 1871.79 129.566  21
   1 -13  -2 1990.94 131.098  21
  -1 -13  -2 1981.19 130.932  26
  -1  13  -2 1390.48 132.147  22
   1  13  -2 1823.13 136.557  15
   1  13  -2 1591.52 135.824  31
  -1 -13   2 2078.45 133.417  17
   1  13   2 1739.11 138.716   6
  -1  13   2 1308.35 141.561  32
  -1 -13   2 1798.40 128.272  20
  -1 -13  -2 1990.38 131.385  12
   1  13   2 1301.29 152.378  31
  -1 -13  -2 2356.58 135.118  39
   1 -13  -2 1752.14 128.701   1
  -1  13  -2 2222.49 146.181  15
   1 -13   2 1791.44 129.628   2
   1 -13   3 1855.58 111.988  17
   1  13   3 1298.25 108.643  36
  -1  13   3 1403.89 114.122   6
  -1 -13  -3 1486.58 104.859   1
   1 -13   3 1626.17 104.508  42
   1  13   3 1880.33 125.640  22
  -1  13   3 1570.62 116.999  14
  -1  13   3 1071.98 107.991  27
   1 -13  -3 1753.62 112.425  39
   1  13   3 1117.96 107.341  27
  -1 -13  -3 1814.49 112.704  39
   1  13   3 1475.00 114.327  16
  -1 -13   3 1599.05 106.875  26
   1 -13   3 1585.10 105.837  26
  -1 -13  -3 1676.94 107.954  26
  -1  13  -3 1028.18 110.795  31
   1  13  -3 1451.02 115.670  15
  -1  13  -3 1807.42 128.721  15
   1  13   3 1296.10 111.363  24
  -1  13   3 1361.83 108.599  15
   1 -13   3 1751.51 108.474  44
  -1 -13   3 1705.67 107.738  44
  -1  13  -3 1203.39 108.577  22
  -1  13   3 1229.21 112.326  13
   1  13   3 1553.09 114.985  14
   1 -13  -3 1674.48 106.880  12
   1  13  -3 1409.15 111.055  41
   1 -13  -3 1696.59 107.005   2
  -1 -13   3 1576.39 105.134  20
   1 -13   3 1318.30 103.423  37
   1  13   3 1198.40 110.616   4
  -1  13   3 977.091 113.191  38
  -1  13   3 964.297 117.736  32
  -1  13   3 1203.18 108.491  36
   1 -13   3 1462.37 104.829  20
  -1  13  -3 1438.13 105.814  19
   1  13   3 1406.37 114.949  38
  -1  13  -3 1347.95 127.668  23
  -1 -13   3 1612.27 106.798  21
   1 -13   3 1605.77 105.865  21
  -1  13  -3 1332.68 128.727  33
  -1  13   3 1448.79 116.096  16
  -1 -13   3 1636.18 110.113  17
   1  13  -3 1226.80 119.343  33
   1 -13   3 1515.92 106.172   2
   1 -13  -3 1501.09 105.414   1
  -1  13   3 1023.05 108.854   8
   1  13  -3 1095.68 110.269  31
  -1 -13  -3 1711.04 108.119  21
  -1  13   3 1264.85 119.666  22
   1  13   3 1275.45 118.904   6
  -1 -13   3 1305.07 103.648  42
  -1 -13   4-7.24888 13.8176   7
  -1 -13   4-14.5730 12.8417  44
  -1 -13  -4 1.94799 28.0191  39
   1  13  -4-6.58521 24.2361  41
   1 -13   4-4.78356 13.9226  26
   1  13   4-2.69598 26.7646  14
  -1  13  -4 12.1084 20.9371  31
  -1 -13   4-9.71608 17.4498  17
  -1  13   4 1.33993 21.8122  24
  -1 -13  -4 19.5605 14.2884  12
  -1 -13   4 0.38739 8.25397  42
  -1  13  -4-38.4218 55.5968  15
  -1  13   4 12.1553 14.6945  35
   1  13   4-13.9059 18.8324  27
   1  13   4-21.5092 36.9053   6
   1  13  -4-10.6824 37.2354  15
  -1 -13  -4 10.4124 19.3255  21
  -1  13  -4-25.3358 45.9828  33
   1 -13  -4 3.28825 11.0723  12
  -1 -13  -4 1.07485 8.78432   1
   1  13   4 20.5687 41.3893  22
   1  13  -4 13.1500 35.4800  33
  -1  13  -4-2.36045 13.4030  19
   1  13   4 29.8221 27.0994  16
  -1  13   4 3.09403 27.4545  16
   1  13  -4-12.7669 20.8094  31
  -1 -13   4-4.78116 15.3826  21
  -1  13   4-6.80216 30.1270   6
   1 -13   4-1.40229 8.96393  37
  -1  13  -4-12.0999 37.9572  41
   1 -13  -4 6.59737 10.1745   2
   1  13   4 23.3743 21.2217  13
   1  13   4-2.19879 19.8111  24
  -1  13   4 1.53745 27.6586  14
   1 -13  -4 3.01580 28.2856  39
  -1  13   4 4.39974 25.4370  13
   1  13   4-1.56991 25.7124   8
  -1 -13   4 11.9849 14.8176  26
  -1 -13  -4 3.26204 18.9518  26
   1  13   4-4.34073 18.2352  36
   1 -13   4 2.86082 13.5988  21
  -1  13   4 10.8050 24.9202   8
  -1  13   4 49.7465 40.7470  22
   1 -13   4 5.42078 8.54859  42
  -1 -13   4-14.3292 13.0181  20
   1  13   4-26.4726 30.8851  38
   1 -13   4 1.80601 11.4290  20
  -1  13  -4 25.6461 44.8770  23
  -1 -13  -4 17.6613 36.0461  28
   1 -13  -4-0.57363 8.17480   1
   1 -13   4-11.9072 20.9833   7
  -1  13   4-9.73832 31.7700  38
   1 -13   4 0.79380 12.5184  44
  -1  13   4-1.15250 23.9609  27
  -1  13   5 1134.18 98.1060  35
  -1  13   5 1280.83 102.734  24
   1 -13   5 1984.23 105.606  17
  -1 -13   5 1387.61 97.4637  21
  -1  13   5 1154.04 103.962  36
  -1  13  -5 1140.93 110.089  33
   1  13   5 1166.39 100.860  27
  -1 -13   5 1328.79 95.0449  42
  -1  13  -5 1467.95 113.802  23
   1 -13   5 1323.13 95.3545  42
   1  13   5 1165.81 102.054  13
  -1 -13   5 1444.79 97.6501  26
   1  13   5 951.119 96.2714  37
  -1  13  -5 1313.42 108.881  41
   1  13   5 1266.39 102.486  36
  -1  13  -5 923.422 100.040  31
  -1  13   5 1149.08 104.225  13
  -1 -13   5 1458.09 96.7360  20
   1  13   5 2004.20 125.390  22
  -1  13  -5 1432.22 117.172  15
  -1 -13  -5 1380.10 104.244  39
   1  13  -5 1064.22 105.249  33
  -1 -13  -5 1600.72 111.339  28
   1 -13   5 1488.41 96.2603  20
  -1  13  -5 901.631 119.016  34
   1  13   5 1153.95 99.6754  24
   1  13   5 1528.16 114.306  38
  -1 -13   5 1634.80 102.916  17
   1 -13  -5 1697.07 105.831  39
  -1  13  -5 1152.47 96.8274  19
   1  13  -5 1113.88 101.837  41
  -1 -13  -5 1540.93 100.164  12
  -1  13   5 1190.23 105.602  14
  -1  13   5 1139.90 111.308  38
  -1  13   5 1240.07 106.305  16
   1  13  -5 1152.55 106.705  15
   1 -13   5 1336.76 94.7575  37
   1 -13  -5 1588.73 98.7102  12
  -1  13   6 789.333 72.5341  35
  -1 -13   6 854.144 68.3258  42
  -1 -13  -6 1103.66 87.9538  28
   1 -13  -6 1307.91 87.8928  28
  -1  13   6 816.029 78.9291  16
  -1  13  -6 660.867 94.6137  34
   1  13   6 805.388 74.9818  27
   1  13  -6 672.406 78.6103  33
  -1  13   6 825.684 78.7591  14
  -1  13   6 974.529 75.7167  24
   1  13   6 945.045 78.7399  36
   1  13  -6 741.697 81.3146  15
   1 -13   6 1416.91 79.7552  17
  -1  13  -6 939.039 84.3554  23
   1 -13   6 922.539 68.7810  42
   1  13  -6 747.234 75.6288  41
   1  13   6 775.604 75.2666  13
   1  13   6 816.067 77.0890  14
   1  13   6 701.870 70.5079  37
   1  13   6 1038.53 87.8259  38
   1 -13   6 978.906 68.5009  37
  -1 -13   6 1034.89 70.3170  20
  -1  13   6 811.043 77.6603  13
  -1 -13  -6 1008.41 79.3350  39
   1  13  -6 766.044 85.5988  34
   1 -13  -6 1187.28 72.9564  12
  -1  13  -6 932.983 81.6584  41
   1 -13   6 963.747 69.2857  20
  -1  13  -6 697.015 80.2973  33
  -1 -13  -6 1182.65 74.4495  12
   1 -13  -6 1103.13 79.2803  39
  -1 -13   6 1199.68 76.2593  17
  -1  13  -6 789.893 70.9015  19
  -1  13   6 822.886 82.1046  36
   1  13   6 875.796 77.7953  16
  -1 -13   6 939.415 71.2482  26
  -1 -13   6 935.837 71.0400  21
  -1  13   7 630.937 50.9138  24
   1 -13   7 815.977 54.3500  17
  -1 -13   7 709.886 51.3300  17
   1  13   7 505.181 48.0396  37
  -1 -13  -7 815.810 68.2174  28
   1 -13  -7 805.419 67.6968  28
  -1  13   7 584.788 64.7577  36
   1  13   7 521.255 53.0779  16
   1  13  -7 475.281 56.2755  33
  -1 -13   7 553.092 44.8266  42
  -1  13   7 498.258 50.0947  35
  -1  13  -7 484.016 71.8177  34
  -1  13   7 503.166 56.0852  16
   1 -13   7 580.827 44.6752  37
  -1  13   7 447.076 54.5235  14
   1  13  -7 355.786 57.6861  15
  -1 -13  -7 615.197 57.5468  39
   1 -13   7 563.169 44.8431  42
   1 -13  -7 640.361 57.4808  39
   1 -13   7 599.190 45.6457  20
  -1  13  -7 459.786 56.5884  33
  -1 -13  -7 574.724 46.5823  19
  -1  13  -7 469.218 56.8907  41
  -1  13  -7 455.241 47.3997  19
   1  13   7 479.357 52.2188  13
   1  13  -7 437.467 52.8315  41
  -1 -13   7 542.687 47.3311  21
  -1 -13   7 530.212 47.3403  26
  -1 -13   7 626.029 47.2370  20
   1  13  -7 445.863 61.7248  34
  -1 -13  -7 799.420 51.8137  12
   1  13   7 481.025 52.4906  14
  -1 -13  -8 12.4129 18.7334  12
  -1 -13  -8 46.5468 44.8391  28
   1 -13   8-9.35467 14.8007  37
  -1 -13   8 8.74038 17.6448  21
  -1  13  -8-8.59315 19.8646  19
  -1 -13   8 5.42883 13.3367  42
  -1  13   8-4.56847 26.7450  16
   1 -13  -8-45.2003 43.7116  28
  -1  13  -8-1.83083 44.2963  34
  -1 -13   8-8.75014 18.2576  26
   1  13  -8-20.5002 29.1545  41
   1 -13  -8 4.49481 14.8962  19
   1  13  -8-17.3152 36.7112  34
  -1  13  -8-6.28667 32.1382  23
   1  13   8-1.36329 23.2157  16
  -1 -13  -8 10.5370 16.3708  19
   1  13   8 6.95139 21.4420  13
  -1 -13   8 5.04996 16.9297  20
  -1  13   8 25.7634 27.2186  14
   1 -13   8 15.3974 14.9216  20
   1 -13  -8 11.4950 31.9878  39
   1  13  -8-8.58439 28.5643  33
   1  13   8 24.5023 30.3571  36
   1  13   8 27.1314 23.0147  14
   1  13   8 14.0723 16.6219  37
  -1 -13  -8-2.11011 32.9491  39
  -1  13   8-18.1657 20.5648  35
  -1  13  -8 12.3994 31.2375  33
  -1  13   8 32.0409 24.5380  13
  -1  13   8-7.10305 17.8534  37
  -1  13   8-31.8825 41.9111  36
   1  13   9 693.529 58.8652  36
   1  13   9 513.308 49.8946  14
  -1  13   9 593.298 49.1013  35
  -1  13   9 487.661 51.8511  13
   1  13   9 382.852 46.5112  37
  -1  13   9 586.437 63.9994  36
  -1 -13  -9 598.919 55.7352  39
  -1  13  -9 480.159 62.1118  34
  -1 -13   9 549.450 43.4758  42
   1 -13  -9 641.658 65.2333  28
  -1  13   9 540.519 52.7531  14
   1  13  -9 420.534 51.8005  41
   1 -13  -9 631.957 54.5996  39
   1  13   9 507.976 50.0848  16
  -1  13  -9 501.883 53.4291  41
  -1  13  -9 529.098 54.9004  23
   1  13   9 564.217 50.1782  13
  -1  13  -9 419.644 51.8486  33
   1 -13   9 570.362 44.3716  20
   1  13  -9 459.498 58.3584  34
   1  13  -9 361.291 51.0756  33
  -1  13   9 460.564 51.6244  16
  -1 -13  -9 566.293 65.1758  28
   1 -13  -9 606.439 45.5560  19
  -1 -13  -9 496.446 44.6395  19
  -1  13  -9 361.471 45.4711  19
  -1 -13   9 605.691 45.7572  20
   1  13  -9 471.844 52.7626  23
   1 -13  10 400.953 34.2216  42
  -1  13  10 412.568 39.2886  35
   1 -13 -10 554.366 56.3824  28
  -1  13 -10 295.857 37.7106  19
   1  13 -10 353.015 44.4455  41
   1  13  10 381.979 39.9560  16
   1  13  10 517.360 48.8298  36
  -1  13 -10 72.2347 43.6173  23
   1 -13 -10 410.192 45.6019  39
   1 -13  10 453.258 35.4479  20
  -1 -13  10 481.802 37.1271  20
   1  13  10 446.545 40.2246  13
   1  13 -10 81.8111 44.4735  23
  -1  13 -10 241.033 48.4441  34
   1 -13 -10 486.451 37.5501  19
   1  13  10 413.265 40.5934  14
   1  13  10 348.397 36.6356  37
   1  13 -10 272.650 49.8575  34
  -1 -13  10 399.581 34.4568  42
  -1  13  10 393.914 42.7180  13
  -1 -14   0 1236.40 82.4621  17
   1 -14   0 1215.52 82.6133  17
  -1  14   0 659.712 81.6617  38
   1  14   0 1092.65 86.2581  22
   1  14   0 783.487 81.4076  38
  -1  14   0 1052.24 79.5836  19
   1  14   0 1128.00 85.6413  15
  -1  14   0 1113.86 89.5508  15
   1  14   0 999.315 85.7995  13
   1 -14   0 1113.85 81.1615  21
  -1 -14   0 1287.77 81.1698  44
   1 -14   0 1253.63 80.4757  44
   1 -14   0 1042.74 81.1914  26
   1  14   0 861.250 80.9008  27
  -1 -14   0 1216.12 80.9874  12
  -1 -14   0 1269.28 81.4645   2
   1  14   0 1063.84 96.8597  24
  -1  14   0 934.706 86.1937  22
  -1 -14   0 1143.96 83.1840  39
   1 -14   0 1130.81 80.1172   2
  -1  14   0 1039.51 102.534  24
  -1 -14   0 960.834 78.1022  20
  -1  14   0 771.305 98.7914  31
   1  14   0 1022.85 97.6817  31
   1  14   1 34.6741 35.7164  14
  -1 -14   1 36.6293 13.5947  20
   1  14   1 26.5065 21.6052  15
  -1 -14  -1 35.9868 11.5244  44
   1 -14   1 56.4376 18.0611  17
   1  14   1-5.28217 35.5706  24
  -1  14  -1 43.7962 13.9410  19
   1  14  -1 37.4916 15.8118  38
   1 -14   1 53.6761 18.3039  26
   1  14  -1 61.0211 16.2161  27
  -1  14   1 59.5075 16.5162   6
   1 -14   1 41.4031 18.1992  21
  -1  14   1 77.3267 34.1714  13
  -1  14  -1 49.2136 49.7868  33
   1 -14  -1 65.5088 19.7897  26
   1  14  -1 60.3577 20.7164  22
   1  14   1 18.1883 36.8336  16
   1  14   1 36.5000 29.7101   4
  -1  14   1 11.8754 23.3557  15
  -1  14  -1 16.2984 45.8367  24
  -1  14  -1 47.1864 36.8892  15
   1 -14   1 61.1140 12.5250  44
   1  14  -1 54.3175 28.5141  15
  -1 -14   1 57.9423 17.0107  17
  -1  14   1 79.6243 38.1310  24
  -1 -14  -1 39.4947 20.0126  21
  -1 -14   1 58.0939 13.5604   2
  -1 -14   1 36.4587 19.3774  26
   1 -14   1 59.1976 12.4368   2
  -1  14   1 30.8715 20.8642  38
  -1  14  -1-1.27096 19.7958  22
   1  14   1 67.4748 22.9632   6
  -1  14  -1 41.7662 16.4115  38
   1  14   1 18.0117 17.1961  38
   1  14   1 12.2754 24.9624  22
  -1 -14   1 42.5915 19.2545  21
   1  14   1 75.0610 27.1742  13
  -1 -14  -1 25.1211 12.6032   2
   1  14  -1 60.7730 53.6715  33
  -1 -14  -1 54.9513 14.1494  12
   1 -14  -1 18.3881 19.1925  21
  -1 -14   1 46.9361 13.0284  12
   1  14   1 43.8675 17.1122  27
  -1 -14  -1 46.2355 26.4043  39
   1  14   1 27.3649 46.4780  31
   1  14  -1 68.7512 44.8290  24
  -1  14   1 10.9166 47.0929  31
  -1 -14   1 46.5207 12.3896  44
  -1 -14   1 43.1018 20.5005  39
  -1 -14  -1 47.4110 20.6582  26
  -1  14   2 2.43403 45.6701  31
   1 -14   2 19.9749 16.9891  21
  -1 -14  -2 25.5413 27.0250  39
  -1 -14  -2 16.4654 8.23514   1
   1 -14   2 9.84341 10.9915   2
  -1  14   2 7.34236 16.1805  36
   1 -14   2 20.0532 16.8667  26
  -1 -14   2 41.3285 13.3588  20
   1 -14  -2 12.2795 10.0579   2
   1  14   2 12.5779 27.9204   4
  -1 -14   2 24.3297 16.5821  17
   1 -14  -2 30.6199 18.8169  26
   1  14   2 33.3295 29.2626   6
   1 -14   2 24.1577 13.5586  44
  -1  14   2 20.1420 25.5512  38
   1  14   2-12.4511 16.0067  36
   1 -14   2 16.2232 18.8718  17
  -1 -14  -2-2.70376 20.3086  26
   1 -14   2 10.0456 13.0387  20
  -1 -14   2 10.6943 17.2521  26
  -1  14   2 31.1017 22.2092   6
  -1 -14   2 13.2900 13.4120  44
  -1  14   2 5.86147 33.1622  24
   1  14  -2 15.1046 48.5541  24
   1  14   2 43.2405 32.6830  16
   1 -14  -2 24.7556 11.0801  12
   1  14  -2 29.3002 31.1815  15
  -1  14   2 12.9427 21.1734  15
  -1  14  -2 24.6147 13.2328  19
  -1  14   2 16.2852 30.5659  13
   1 -14  -2 25.9990 27.1143  39
   1  14  -2-4.62354 25.9186  31
   1  14   2 36.8520 33.6201  14
  -1 -14   2 13.1586 17.1223  21
  -1  14  -2 53.1562 46.4360  15
   1 -14  -2-2.19800 9.50169   1
  -1  14   2-10.4242 35.6497  22
  -1 -14  -2 15.7660 12.3119   2
   1  14   2 18.0596 49.8776  31
  -1  14  -2 8.22052 17.3390  22
  -1  14  -2 70.3651 62.2405  33
  -1  14  -2 16.8440 14.7942  38
  -1 -14  -2 5.39115 20.3686  21
   1  14   2-4.94128 24.0035  13
  -1  14   2-2.27681 53.6463  32
   1  14  -2 16.9151 17.5896  22
   1 -14  -2 23.7455 19.5448  21
  -1  14   2 11.9432 17.5714  27
  -1  14  -2-13.1655 29.6786  31
  -1 -14  -2 29.0762 14.4335  12
   1  14  -2 13.0024 48.1838  33
   1  14   2 18.9072 21.0899  38
  -1  14   3 1.99558 19.5089  15
  -1 -14   3 7.68860 8.78552  42
  -1  14  -3-11.2887 58.2062  15
   1 -14   3-0.66407 12.9099   2
   1 -14  -3-2.21205 20.2430  21
   1 -14   3-14.5879 16.3867  21
  -1  14   3-20.4922 24.0817  27
  -1 -14   3-1.00736 17.3773  17
  -1  14   3-8.48639 22.0284   8
   1  14   3 12.6663 35.5294   6
   1  14   3-9.99753 19.1546  27
   1 -14  -3 4.43666 20.1978  26
   1  14   3-3.25829 28.1544  38
   1  14   3-24.4883 29.7543  14
   1 -14   3 7.41555 9.94922  42
  -1 -14  -3 6.73499 8.32936   1
   1  14   3 21.0859 18.4830  36
   1  14   3 1.53884 30.4696  16
   1 -14   3 23.3384 32.1171  17
   1 -14  -3 4.82802 11.5229  12
  -1 -14  -3-0.70323 20.4808  26
  -1  14   3 9.04457 35.9658  16
  -1  14   3-1.64917 26.9559  13
  -1  14   3-10.5419 19.9874  36
   1 -14  -3 16.9209 29.4850  39
  -1  14   3 1.48163 29.4991   6
  -1  14   3-7.50807 44.3380  22
  -1  14   3-19.2584 35.2222  38
  -1 -14  -3-12.9355 29.5487  39
  -1  14   3-7.19081 35.5459  14
  -1  14  -3 20.6024 18.2853  22
  -1  14  -3 25.0340 66.9118  33
   1  14  -3-1.37263 23.0211  31
  -1 -14   3 10.1813 16.7369  21
   1  14   3 5.22459 23.1800  13
   1  14   3-21.8644 27.3189   4
   1 -14   3 4.29056 13.2660  20
   1  14   3 1.38407 24.8574  24
  -1 -14   3-0.63834 16.5642  26
   1  14  -3 36.2769 45.5331  33
   1 -14   3-5.43315 10.0155  37
   1  14  -3-40.2065 35.7996  15
  -1 -14   3-2.38658 12.9427  20
  -1  14  -3 2.67121 61.4949  23
  -1  14   3 24.5331 51.6063  32
   1  14   3 10.9376 38.2142  22
  -1 -14  -3 34.3617 21.0161  21
  -1  14  -3-18.7302 15.4105  19
  -1  14  -3-16.6279 27.0679  31
   1 -14   3-5.42484 16.2086  26
  -1  14   4 544.571 52.6054  24
  -1 -14   4 502.377 43.7269  21
   1 -14  -4 610.634 54.3244  39
  -1 -14  -4 550.038 46.1950  21
  -1 -14   4 442.677 39.5239  42
  -1  14   4 362.305 50.2546  27
   1  14   4 425.697 46.8115  27
  -1  14   4 501.609 57.0008  14
  -1  14  -4 608.381 76.8443  15
   1  14   4 452.874 52.8438  14
   1  14   4 458.509 53.2047  16
  -1 -14   4 522.834 43.6708  26
  -1  14   4 466.051 55.5545  16
   1 -14   4 570.323 42.5527  26
  -1 -14  -4 567.684 46.4879  26
   1  14  -4 461.563 60.4598  15
  -1 -14   4 551.708 42.3588  20
   1  14   4 519.199 49.7032  24
  -1  14  -4 346.230 48.2775  31
  -1  14  -4 545.672 74.2605  23
   1 -14   4 588.291 42.4873  21
   1 -14   4 473.504 39.4712  37
  -1  14   4 478.438 70.4681  22
   1  14   4 562.833 59.7389  38
  -1 -14  -4 615.763 58.5943  28
   1 -14   4 546.458 41.4976  20
  -1  14   4 332.619 59.8902  38
  -1 -14  -4 626.070 54.2759  39
  -1  14   4 390.826 47.1250  36
   1 -14   4 578.654 40.3410  42
   1  14   4 745.567 73.1721  22
  -1  14   4 343.108 51.2939  13
   1  14  -4 437.673 61.7941  33
   1 -14  -4 660.590 44.0450  12
  -1 -14   4 613.787 48.6936  17
  -1 -14  -4 658.357 46.9230  12
  -1  14  -4 404.714 42.0127  19
   1  14   4 443.114 46.6939  36
   1  14  -4 406.945 52.3373  41
   1  14  -4 362.330 49.0040  31
  -1  14  -4 500.342 73.9701  33
  -1 -14   5 56.4774 12.1815  42
   1  14   5 50.6736 24.7894  36
  -1  14   5 65.9584 33.7731  14
  -1 -14  -5 77.3511 19.7437  12
   1  14   5 60.4101 26.9519  27
  -1 -14  -5 75.7993 45.1418  28
  -1  14  -5 79.8010 24.9267  31
   1 -14   5 115.269 24.8673  17
  -1 -14   5 65.8540 22.4889  17
   1  14  -5 74.9159 39.8320  15
  -1  14  -5 59.8052 44.8986  23
   1  14  -5 50.5281 28.4556  41
   1 -14   5 58.9530 12.5708  37
  -1 -14  -5 7.61677 22.8845  26
  -1  14  -5 31.6500 39.2245  41
   1  14  -5 38.8148 22.0448  31
   1  14   5 47.9119 29.4730  16
  -1  14   5 55.2879 31.8961  16
  -1  14   5 44.2194 27.5245  36
   1 -14   5 63.2847 11.9139  42
   1 -14  -5 70.0369 15.9931  12
   1 -14  -5 73.8229 33.8353  39
   1  14   5 103.761 42.5879  38
  -1  14   5 33.5837 42.3391  38
   1  14   5 63.0245 30.6016  14
  -1 -14  -5 72.1796 23.9028  21
  -1  14   5 52.1236 23.8645  24
  -1 -14   5 64.8781 15.8771  20
  -1  14  -5 59.8670 16.8492  19
  -1  14  -5 93.5223 56.6049  15
   1 -14   5 69.8662 15.0789  20
  -1 -14   5 67.7350 16.9265  21
   1  14   5 35.0129 25.8898  24
  -1  14   5 49.5128 27.0781  13
   1  14   5 253.315 83.4541  22
  -1 -14   5 58.2032 16.8891  26
   1  14   5 33.2554 23.9586  13
  -1 -14  -6 50.1235 18.7419  12
  -1  14   6 18.1827 33.1309  36
  -1 -14   6 28.0318 16.8304  26
  -1 -14   6 17.1555 20.7257  17
  -1  14   6 39.4994 19.6665  35
  -1 -14  -6 14.0649 34.5632  39
   1  14   6 17.8556 22.8982  13
  -1 -14   6 8.83158 16.3300  21
   1 -14   6 35.4142 22.8213  17
   1 -14  -6-35.8490 50.7770  28
   1  14  -6 11.9219 28.4366  41
  -1  14  -6-20.2477 35.9685  33
   1  14  -6-1.34252 39.0065  15
   1 -14  -6 23.7008 15.3753  12
  -1 -14  -6 16.2630 23.5143  26
  -1  14   6 32.1719 31.4300  16
   1  14   6 46.3168 26.8295  27
   1  14  -6-1.62243 30.7095  33
   1 -14   6 22.3772 11.1913  42
  -1  14  -6 1.96558 37.5255  23
   1 -14   6 21.5333 11.9565  37
  -1  14   6-8.88691 30.8690  14
  -1  14   6 1.72728 25.9472  13
   1 -14  -6 23.5092 31.5727  39
  -1  14  -6 84.4489 56.8415  34
   1 -14   6 42.0076 13.3333  20
   1  14   6 20.9731 25.4165  36
  -1 -14  -6 28.5828 24.1908  21
   1  14   6 34.3731 36.2262  38
  -1  14  -6 14.5460 17.8044  19
  -1 -14   6 17.4601 11.3988  42
  -1  14   6 42.4472 20.5235  24
  -1 -14  -6 3.03023 41.6859  28
  -1  14  -6 49.9800 36.4466  41
  -1 -14   6 21.4889 14.7994  20
  -1  14   7-58.3096 31.6196  13
   1  14  -7 21.8460 35.2332  15
  -1  14  -7 10.3477 52.8285  34
  -1 -14  -7-16.3068 33.4193  39
   1  14   7 7.39630 25.9335  14
   1  14  -7 31.0619 30.3232  33
  -1  14  -7 21.6028 18.9708  19
   1  14   7-10.4136 22.3593  13
  -1 -14  -7-36.1475 45.0928  28
   1 -14  -7-6.16467 43.5427  28
  -1 -14  -7-12.9155 25.0998  21
  -1  14   7-15.6591 20.0544  24
  -1 -14   7 6.25412 17.6249  26
  -1 -14  -7 16.7575 24.7100  26
   1  14   7 13.3846 26.5290  16
  -1  14   7-43.1036 33.1311  16
   1  14   7 4.46189 15.3379  37
   1 -14   7-7.27049 12.4856  42
  -1  14   7-6.86181 28.8263  14
  -1 -14  -7 7.32999 15.4506  19
  -1  14  -7 9.73994 33.0210  41
  -1 -14   7 4.68200 16.6661  21
   1 -14   7 14.3470 12.5575  37
  -1 -14   7 9.26917 12.4905  42
   1 -14  -7 13.6141 32.4249  39
  -1  14   7 20.5823 38.1295  36
  -1  14  -7 18.0387 32.0131  33
  -1  14  -7 1.78263 34.2550  23
  -1 -14  -7 7.50829 18.9659  12
   1 -14   7-4.59524 22.4937  17
  -1  14   7 4.05710 20.5236  35
  -1 -14   7 10.3044 15.8475  20
   1  14  -7 7.55749 41.4664  34
   1 -14   7-9.40682 14.1688  20
  -1 -14   7-2.02857 19.9160  17
   1  14  -7-1.37106 27.1478  41
  -1 -14  -8 39.4082 19.8072  12
   1  14   8 29.5903 24.6314  14
   1 -14   8 59.9197 16.6029  20
  -1 -14  -8 20.2689 44.6975  28
  -1 -14  -8 51.0275 17.3222  19
  -1  14  -8 21.4289 30.4268  41
  -1 -14   8 30.8432 18.5153  26
   1  14   8 31.1520 32.3060  36
   1  14   8 15.5751 25.0122  16
  -1  14  -8 76.8731 32.2732  33
   1 -14   8 39.2062 14.9169  37
  -1 -14   8 45.3452 15.6396  42
  -1  14   8 61.3054 41.0082  36
  -1  14  -8 31.0364 35.2795  23
  -1  14   8-3.29272 28.9883  13
   1  14  -8 21.9346 40.7806  34
   1 -14  -8 34.2960 45.9716  28
  -1 -14  -8 3.32989 35.6042  39
  -1 -14   8 67.4258 18.7936  20
  -1  14  -8 66.4894 47.8465  34
   1  14   8 0.91649 17.1907  37
   1  14  -8 46.5898 31.1262  33
  -1 -14   8 64.8620 19.8724  21
   1 -14  -8 59.7197 16.7332  19
   1  14  -8 46.2454 29.5135  41
  -1  14   8 36.1344 21.6327  35
   1  14  -8-10.3306 31.5966  23
   1  14   8 18.5000 24.0187  13
  -1  14  -8 34.8388 20.6144  19
   1  14   9 20.6909 22.6734  13
   1  14   9-0.89365 17.3286  37
  -1  14   9 18.9199 38.6116  36
  -1  14  -9-5.94848 30.4402  23
   1 -14   9 13.3834 15.3813  42
  -1  14   9 18.7846 27.6372  16
  -1 -14   9 32.4154 15.2535  42
   1 -14  -9-23.7982 34.0160  39
  -1  14  -9 33.7377 41.5428  34
   1  14   9 19.2225 24.2631  16
  -1  14  -9 59.8934 30.9905  41
   1  14   9 48.4906 24.9173  14
   1  14   9-6.17537 30.5578  36
  -1  14   9 13.4667 25.7073  13
   1  14  -9 64.6692 29.8061  33
  -1  14   9 1.97369 20.9458  35
   1  14  -9-7.10769 30.2832  23
  -1  14  -9 27.0505 20.8622  19
  -1 -14  -9 74.9966 36.0048  39
  -1  14   9 38.8550 27.2786  14
  -1 -14   9 21.8861 17.7213  20
   1  14  -9 26.2880 29.4763  41
   1  14  -9 4.13040 39.4747  34
  -1  14  -9 33.6687 28.4102  33
   1 -14   9 12.5923 15.7501  20
   1 -14  -9 25.5015 15.9875  19
  -1 -14  -9-19.0216 43.2050  28
   1 -14  -9 46.8606 46.1580  28
   1  14  10 97.3397 24.0190  13
  -1  14 -10 76.5262 30.2773  41
  -1  14 -10 82.0782 23.7327  19
  -1  14 -10 10.4765 30.8547  23
   1 -14  10 134.952 19.6346  20
   1  14 -10 15.6416 31.3148  23
   1  14  10 133.551 25.0530  14
   1  14 -10 90.5370 32.4878  41
  -1  14 -10 61.0941 39.1302  34
  -1  14  10 123.101 28.0478  13
   1  14  10 132.935 25.0558  16
   1 -14 -10 164.513 44.4508  28
  -1 -14  10 139.501 21.3568  20
   1 -14  10 122.645 18.0733  42
  -1 -14 -10 127.952 44.3689  28
   1 -14 -10 142.377 20.6946  19
   1  15   0 1875.14 184.474  38
   1  15   0 2192.79 184.050  27
  -1 -15   0 2921.98 186.224  39
   1 -15   0 2849.10 184.145  26
   1 -15   0 3098.80 186.571  17
   1  15   0 2374.79 189.060  22
  -1 -15   0 2402.09 181.141  20
   1  15   0 2309.96 188.579  13
  -1  15   0 1903.51 188.703  22
   1  15   0 3165.62 202.344  24
  -1  15   0 2854.65 193.677  15
  -1  15   0 2636.52 210.149  24
  -1  15   0 2402.93 182.243  19
  -1  15   0 1704.85 184.686  38
  -1 -15   0 2964.18 184.586   2
   1 -15   0 2922.22 184.335  21
  -1  15   0 1967.49 204.364  31
  -1 -15   0 2979.55 184.468  12
  -1 -15   0 3236.76 186.117  17
   1  15   0 2159.99 198.429  31
   1  15   0 2660.18 187.766  15
   1  15   1 7.04036 17.6139  27
   1  15   1 2.73712 53.1864  31
  -1  15   1 31.6524 26.9313  15
  -1 -15  -1 15.2864 9.62201   1
  -1  15   1-2.83265 43.6418  24
   1 -15   1 483.028 40.8442  17
  -1 -15   1 38.3345 14.4386  12
   1  15  -1 45.1848 18.2843  38
  -1 -15   1 24.8254 21.3076  26
   1  15  -1-7.03849 47.4909  24
   1  15  -1 26.0157 31.4963  13
  -1 -15   1 12.7217 20.7688  21
  -1 -15  -1 305.073 33.7716  26
   1 -15   1 114.480 27.3916  26
   1  15   1-12.0925 40.7038  14
   1  15   1-3.47472 40.5319  16
  -1 -15  -1 33.7831 29.0651  39
  -1  15  -1 321.667 79.5745  15
  -1 -15   1 5.89688 21.2754  39
   1  15   1 29.8274 37.7113  24
   1 -15  -1 24.5635 21.5864  21
  -1 -15  -1 228.940 32.8802  21
  -1 -15   1 6.62507 17.5333  17
   1  15  -1-2.60404 22.5177  22
   1  15   1 2.60061 20.8798  38
   1  15   1 23.9016 29.3595  22
  -1 -15  -1 33.6400 15.4953  20
  -1 -15   1 30.5689 15.1307  20
  -1  15  -1 2147.06 124.510  31
   1  15   1 6.71643 23.7599  15
   1 -15   1 148.150 27.0270  21
  -1  15  -1 336.006 98.7375  24
  -1  15  -1 2386.35 83.8894  22
  -1  15  -1 2237.94 131.130  33
   1  15  -1 20.3078 29.3753  15
  -1  15   1-4.39794 21.3249  38
   1 -15  -1 16.6671 20.6526  26
   1  15   1 327.301 47.7192  13
  -1  15  -1 166.469 24.3790  19
  -1  15   1 41.4631 59.6097  31
  -1 -15  -1 9.81949 15.2486  12
   1  15  -1 46.8587 17.3967  27
   1 -15   2 43.9593 21.5672  17
  -1 -15  -2 52.8574 23.9593  21
  -1  15  -2 79.6067 52.0514  15
   1  15   2-4.27152 27.3084  13
   1  15   2 53.9918 25.0015  38
  -1 -15   2 53.9649 18.7243  17
  -1  15   2 19.0114 36.8204  24
   1  15  -2 36.9580 50.8462  24
  -1  15   2 53.4304 41.5851  22
  -1 -15   2 47.6741 20.1094  21
  -1 -15   2 64.0503 20.2394  26
   1 -15   2 52.4405 19.7967  26
  -1 -15  -2 53.0184 23.9772  26
  -1 -15  -2 68.5286 31.7926  39
   1 -15   2 59.4693 11.9165  42
  -1  15   2 34.4977 24.5511  15
  -1  15  -2 40.2288 34.3347  31
   1  15  -2 76.6745 32.4738  15
  -1  15  -2 46.4486 15.7067  19
   1  15   2 30.1294 18.2667  36
  -1  15  -2 46.9527 16.7618  38
  -1 -15   2 50.4383 15.7545  20
  -1  15   2 12.6337 28.8053  38
   1  15   2 52.5412 38.3183  14
   1 -15  -2 74.4285 30.5103  39
   1 -15  -2 61.3062 13.4037  12
   1  15  -2 49.8487 20.8521  22
  -1 -15  -2 89.8189 18.9390  12
   1  15   2 38.8399 55.1220  31
  -1  15  -2 51.3206 20.6015  22
   1  15  -2 20.8976 29.5888  31
   1 -15   2 48.4645 19.5044  21
  -1  15  -2-21.1886 71.7335  33
   1  15  -2 37.3251 54.3134  33
  -1  15   2 35.8567 36.6638  13
   1 -15  -2 54.7755 22.4750  21
   1 -15  -2 52.6176 21.9113  26
  -1  15   2 68.9693 57.8998  31
   1  15   2 59.8806 38.4439  16
  -1 -15   3 21.0604 10.5798  42
  -1  15   3 40.7305 30.7948  24
   1  15   3 20.3953 26.6107  24
   1 -15   3 28.5836 17.3459  21
  -1  15  -3 30.6293 60.7350  15
  -1  15   3 40.8110 32.7560  13
  -1  15   3 38.1087 47.4509  22
  -1  15   3 6.90965 19.4512  36
   1  15   3 12.0586 19.0089  36
   1  15   3 7.37937 25.9210  13
   1 -15  -3 23.9420 21.9568  26
  -1  15  -3 47.6703 73.4237  33
   1 -15   3 13.4335 17.2986  26
   1 -15   3 23.6677 10.6828  42
  -1  15   3 2.12605 40.8836  14
   1  15   3 17.6460 33.8944  16
  -1  15   3 21.3898 40.4620  16
  -1  15  -3 27.9138 19.7186  22
  -1 -15  -3 23.3712 31.5672  39
  -1 -15   3 16.9151 17.4664  21
   1  15  -3 17.4518 26.0838  31
  -1  15   3 40.4522 36.2403  38
   1  15   3 15.7885 34.0909  14
  -1  15   3-2.60452 24.2131  27
  -1 -15  -3 22.2252 24.2378  26
  -1 -15  -3 9.49546 23.0095  21
  -1  15  -3 19.0610 27.5685  31
   1 -15  -3 27.9947 21.8478  21
   1 -15  -3 29.4133 32.0076  39
   1  15  -3 5.71758 35.4106  15
  -1 -15   3 8.99870 14.8327  20
  -1 -15   3 33.2294 18.1299  26
   1 -15   3 54.2652 21.8294  17
   1  15  -3-40.1296 51.5577  33
   1  15   3 28.2087 29.3235  38
  -1  15   3 31.7505 21.5235  15
  -1  15   3 52.7551 59.2968  32
  -1  15  -3 21.4647 15.0410  19
   1  15   3-1.13887 21.6815  27
   1  15   3 2.40412 39.5652  22
   1 -15  -3 27.9601 12.3207  12
   1 -15   3 34.9090 11.5198  37
  -1 -15   3 40.0968 19.4505  17
  -1  15  -4 1674.65 128.787  19
   1  15  -4 1160.07 141.696  33
  -1 -15   4 1873.08 129.501  21
   1  15   4 1351.81 132.126  27
  -1  15   4 1488.59 138.429  13
  -1  15   4 1871.33 157.304  22
   1 -15   4 2532.19 138.981  17
   1  15   4 1630.14 133.241  36
  -1  15   4 1291.96 134.406  27
   1 -15   4 1762.50 126.216  37
   1 -15  -4 2266.86 138.399  39
  -1 -15   4 1853.49 129.514  26
   1 -15   4 1844.17 128.391  26
   1 -15  -4 1952.57 132.233  26
   1  15   4 2472.84 156.646  22
  -1 -15   4 1703.13 126.573  42
  -1 -15  -4 1972.47 137.166  39
   1  15  -4 1565.84 137.948  15
  -1  15  -4 1564.11 154.072  15
   1 -15   4 1902.16 127.992  20
  -1  15   4 1620.37 142.910  16
  -1 -15   4 1860.45 128.083  20
  -1  15  -4 1544.68 158.927  33
  -1 -15  -4 1795.94 131.267  21
  -1  15   4 1752.33 143.551  14
  -1  15   4 1277.78 132.017  36
   1 -15   4 1919.95 128.527  21
   1  15   4 1551.69 141.747  38
   1 -15  -4 1888.42 132.026  21
   1 -15   4 1957.35 127.363  42
  -1  15  -4 1679.74 156.554  23
   1  15   4 1559.46 137.449  14
  -1  15   4 1811.79 139.359  24
  -1 -15  -4 1813.25 131.358  26
   1 -15  -4 2303.35 131.501  12
  -1 -15  -4 2221.60 133.120  12
  -1  15  -4 1189.52 133.878  31
  -1  15   4 1318.02 145.022  38
   1  15   4 1549.21 138.011  16
   1  15   4 1638.13 134.722  24
   1  15  -4 1196.53 132.553  31
   1  15  -5-4.41809 39.7573  15
  -1 -15   5 23.5103 14.3361  20
  -1  15   5 48.3552 37.3772  14
  -1  15  -5-30.0586 58.5194  15
   1  15   5 13.7019 21.1752  24
  -1  15   5-9.40568 23.9017  24
   1  15  -5-18.0528 31.2429  41
  -1 -15   5-8.22624 22.8497  17
  -1 -15   5 2.24121 15.6924  26
  -1  15   5 14.8027 36.5473  16
  -1 -15  -5-3.34480 25.2746  21
   1 -15   5-1.18130 14.1630  20
   1 -15  -5-18.0337 35.9971  39
   1  15   5 42.4678 30.5110  16
  -1 -15  -5-6.70798 25.3440  26
   1 -15   5 4.12222 11.7280  37
   1  15   5-6.75830 30.9037  14
  -1 -15   5 7.45232 15.7689  21
   1  15   5 1.57661 24.3179  13
  -1  15   5 32.4180 32.3530  13
   1  15   5-8.02427 24.7785  27
   1  15   5-15.7722 38.8699  38
  -1  15   5 2.71580 47.7812  38
  -1  15  -5 14.3232 23.2819  31
   1 -15   5 10.6115 10.3869  42
   1  15   5-1.38659 22.8053  36
  -1 -15  -5 7.06664 17.2596  12
  -1 -15  -5-29.7079 43.8397  28
  -1  15  -5 27.2926 51.3255  23
  -1 -15   5 0.52107 10.8408  42
   1 -15   5 1.35340 24.5136  17
   1  15  -5 26.2371 39.5960  33
   1  15   5 26.7077 46.2411  22
  -1  15  -5 18.8509 16.4505  19
   1 -15  -5 13.3161 15.1524  12
   1  15  -5 1.41204 23.4557  31
  -1 -15  -6 68.9885 20.8141  12
   1 -15  -6 34.3089 35.6715  39
  -1  15   6 24.2803 34.0445  36
   1 -15   6 87.9573 27.1876  17
   1 -15   6 47.9992 15.0311  20
   1  15  -6 4.15107 36.2659  15
  -1  15  -6 48.2390 47.5191  15
  -1 -15   6 39.7240 22.1986  17
  -1 -15  -6 58.0728 26.7149  26
   1  15   6 21.5069 28.3538  16
  -1 -15   6 28.9065 18.0051  26
   1  15   6 66.8485 39.5318  38
  -1  15  -6 63.3888 39.6727  41
  -1  15   6 43.9274 23.5318  24
   1  15   6 20.6208 24.1639  13
  -1  15   6 33.5700 29.4077  13
  -1  15  -6 22.6465 18.8344  19
  -1 -15  -6 45.5142 25.6966  21
   1  15   6 15.3344 27.5056  27
  -1 -15  -6 26.2171 37.2405  39
   1  15   6 27.9678 28.7138  14
  -1 -15   6 40.5961 13.3892  42
  -1 -15  -6 77.5233 44.0373  28
  -1 -15   6 25.5334 16.3615  20
  -1 -15   6 40.5320 17.8356  21
   1 -15   6 42.9295 13.1076  37
   1  15   6 35.0911 26.4576  36
   1 -15   6 18.5918 12.3549  42
  -1  15  -6 66.3767 43.6389  23
  -1  15   6 5.93182 35.1341  14
   1  15  -6 36.5181 30.0835  41
  -1  15  -6 64.5062 41.8128  33
   1  15  -6 66.2841 35.8166  33
  -1  15   6 53.6822 35.0838  16
   1 -15  -6 65.8764 18.3874  12
  -1 -15  -7 2.43033 37.4590  39
  -1 -15   7 32.3728 18.7879  21
  -1 -15   7 19.0268 20.7055  17
  -1  15   7 24.5563 21.2144  24
   1  15  -7-4.68386 32.5654  23
   1 -15   7 8.45992 23.5624  17
  -1  15   7 40.7641 33.8567  16
   1  15  -7 24.1633 29.0158  41
  -1 -15   7 12.6256 13.7416  42
   1 -15  -7 29.7923 37.5275  39
  -1  15   7 39.0730 38.2978  36
  -1  15   7 10.7815 28.2418  13
   1  15   7 23.1847 23.9787  13
  -1  15  -7 25.3666 37.4477  41
  -1  15  -7 18.8320 38.2270  23
  -1  15  -7 23.1682 34.8718  33
   1 -15   7 22.2598 14.9853  20
  -1 -15  -7 15.8644 26.1315  21
  -1 -15  -7 29.8873 16.6301  19
  -1 -15  -7-0.96019 20.3987  12
  -1  15  -7-17.5499 51.4249  34
  -1 -15   7 38.9175 19.2158  26
  -1 -15   7-7.71757 16.9425  20
   1 -15   7 24.3700 13.9036  37
  -1 -15  -7 42.9596 26.0502  26
   1  15   7 3.21509 29.8067  36
  -1 -15  -7 25.2925 46.0847  28
   1  15  -7 9.88431 36.1203  15
  -1  15   7 25.8125 33.0812  14
   1  15  -7 26.5331 33.5786  33
   1 -15  -7 18.5507 14.7563  19
   1 -15  -7-15.9417 46.9181  28
  -1  15  -7 4.25521 19.4310  19
   1  15  -8 637.172 66.0371  41
  -1  15   8 587.020 66.1931  16
  -1 -15  -8 739.433 68.9183  39
  -1 -15  -8 932.779 78.1932  28
  -1 -15   8 655.457 57.8832  21
   1 -15   8 792.236 56.8311  20
  -1 -15   8 771.862 57.4190  20
  -1 -15   8 657.546 55.3225  42
   1  15   8 679.498 63.5516  16
   1  15   8 698.057 64.1219  14
  -1  15  -8 724.522 68.7430  41
   1  15   8 704.694 64.0379  13
  -1  15  -8 574.813 75.4273  34
  -1 -15   8 623.263 57.5321  26
   1  15  -8 526.569 65.5001  33
   1 -15  -8 814.827 57.7363  19
  -1  15   8 784.535 75.1011  36
  -1 -15  -8 954.924 61.1826  12
  -1  15   8 615.180 66.6899  14
   1  15  -8 575.003 69.7201  34
  -1  15  -8 631.488 67.3396  33
   1  15   8 860.380 69.2084  36
   1 -15  -8 962.822 78.8686  28
  -1  15  -8 537.237 57.7712  19
  -1  15  -9-11.1267 31.7885  41
  -1 -15  -9 8.58633 43.9629  28
   1  15  -9-28.5844 29.9000  33
   1  15   9-10.1253 23.0726  16
   1 -15  -9-4.21845 44.9517  28
  -1  15  -9-19.5465 21.6939  19
  -1 -15  -9-24.6481 37.0882  39
  -1 -15   9-11.3644 15.1277  42
   1  15  -9-4.23628 29.7608  23
   1 -15  -9 13.8220 16.5962  19
  -1  15   9 20.7477 26.7944  13
   1 -15  -9 8.59559 35.1953  39
  -1  15  -9 76.5845 43.4247  34
   1  15   9-2.53371 21.3697  13
   1  15  -9-2.65007 36.8717  34
  -1  15   9 1.78883 36.6255  36
   1  15   9 26.6438 28.9411  36
  -1 -15   9 7.77715 17.4824  20
   1  15   9-2.52195 23.7630  14
  -1  15  -9 27.9369 30.9890  33
   1  15  -9 9.50171 29.1621  41
   1 -15   9-12.6389 15.5706  42
   1 -15   9-2.62545 16.9630  20
  -1  15  -9 45.6673 32.0190  23
  -1  16   0 33.1475 36.7759  15
   1  16   0 77.1428 33.3696  13
  -1  16   0 24.3068 26.6588  22
  -1 -16   0 47.2094 16.3876  12
   1 -16   0 39.1675 16.1791  20
   1  16   0 32.7220 25.6632  22
   1  16   0 28.2457 27.8871  15
   1  16   0 14.1236 17.3013  27
   1  16   0 8.89702 19.4923  38
  -1  16   0 24.0480 63.1046  24
   1  16   0-31.4406 45.1360  24
   1 -16   0 59.2964 22.9516  21
  -1 -16   0 4.47405 25.6765  39
  -1  16   0 39.4570 62.5317  31
  -1  16   0 30.9174 19.9252  38
  -1 -16   0 38.1285 17.7253  17
   1 -16   0 16.4436 22.2245  26
  -1 -16   0 37.0612 16.1220  20
  -1  16   0 28.4474 17.5277  19
   1  16   0 2.63932 49.3251  31
  -1 -16  -1 28.5551 15.8710  12
   1 -16   1 13.3537 20.2611  17
   1  16  -1 12.5155 16.5248  38
   1 -16   1-7.37490 22.6242  21
  -1 -16   1 15.2522 15.2994  12
   1 -16   1-9.62283 22.0430  26
   1  16  -1-1.44455 21.4035  22
  -1 -16   1-6.10640 17.7882  17
  -1 -16  -1 37.7752 16.1371  20
  -1  16   1 18.8239 29.1112  15
   1  16  -1 9.87090 32.1001  13
  -1  16   1 8.23526 23.5415  38
  -1 -16  -1 0.83862 25.3056  26
  -1  16  -1 12.0619 66.7802  24
  -1 -16   1 18.3146 16.3761  20
  -1  16   1 13.7910 51.6971  24
  -1 -16   1 6.33278 20.6150  26
   1  16   1 18.7249 26.5476  22
   1  16   1-8.82220 35.9811  24
   1 -16  -1 16.4431 22.9492  26
  -1 -16  -1-37.8495 31.3177  39
  -1  16  -1 3.22622 22.1821  22
   1  16   1 5.69872 21.3687  38
  -1 -16  -1-2.50712 24.2831  21
  -1  16  -1 25.3157 17.1491  19
   1  16   1-12.3138 17.4694  27
  -1 -16   1 15.7756 21.0132  21
  -1  16  -1-4.97922 19.1621  38
   1 -16  -1 3.27818 23.2402  21
  -1  16   1 4.23120 70.9656  31
   1  16  -1-5.05478 49.0667  24
   1  16  -1 11.6788 30.0010  15
   1  16   1 17.6724 52.8122  31
   1  16   1-7.47952 23.9926  15
   1  16   1 7.71232 30.6734  13
  -1  16  -1-10.9293 44.8740  15
  -1  16  -1 35.5075 49.8986  31
  -1 -16   2 250.885 29.5780  17
   1  16   2 188.834 28.1391  36
  -1  16   2 141.499 50.2207  13
  -1  16   2 233.490 52.9602  24
   1 -16   2 217.752 27.5352  21
  -1 -16  -2 254.395 32.9117  21
  -1  16   2 101.454 37.0720  38
   1  16  -2 109.647 38.4186  31
   1  16   2 224.446 63.4862  31
  -1 -16   2 216.710 24.0745  20
  -1  16  -2 205.003 24.9636  19
  -1 -16   2 214.426 28.1419  26
   1 -16  -2 217.340 30.5293  26
   1  16   2 214.207 50.2195  16
   1 -16  -2 217.997 23.7798  12
  -1  16   2 122.173 49.2505  22
   1  16   2 199.273 47.3926  14
  -1  16  -2 322.372 64.3044  15
   1 -16   2 229.973 21.1671  42
  -1  16  -2 161.261 30.7372  22
  -1  16  -2 137.088 25.7103  38
  -1 -16   2 212.813 27.7190  21
   1  16   2 162.202 36.8887  13
  -1 -16  -2 206.896 32.6371  26
   1 -16   2 200.162 27.2932  26
  -1  16   2 238.578 34.1440  15
  -1 -16  -2 284.870 39.4861  39
   1 -16  -2 231.234 39.4780  39
   1  16  -2 136.702 29.1197  22
   1  16  -2 164.303 60.1845  33
   1 -16   2 253.711 31.6967  17
  -1  16  -2 138.663 86.2138  33
   1  16  -2 166.183 57.3222  24
  -1 -16  -2 227.020 27.4229  12
   1 -16  -2 248.639 30.7885  21
  -1  16   2 212.252 71.9302  31
  -1  16  -2 96.0121 44.4455  31
   1  16  -2 189.895 39.9004  15
   1  16   2 141.902 34.2489  38
  -1 -16   3 127.258 22.9546  26
  -1  16  -3 111.157 21.2158  19
  -1  16  -3 78.5363 65.5632  15
  -1  16   3 77.0752 53.4185  22
   1 -16   3 181.933 27.8094  17
  -1  16   3 127.073 38.6262  24
  -1 -16   3 127.681 25.2484  17
  -1 -16  -3 155.348 23.9204  12
  -1 -16   3 113.009 15.9225  42
   1 -16   3 103.581 15.8354  37
  -1 -16  -3 153.143 30.5982  26
   1 -16   3 121.024 22.5162  21
   1 -16   3 143.162 16.7812  42
   1 -16  -3 120.357 27.5705  26
  -1  16   3 92.8210 26.6455  15
   1  16   3 128.269 41.8413  16
   1  16   3 141.216 36.3542  24
   1  16   3 68.9320 24.7714  36
   1  16  -3 113.319 38.4874  15
   1  16   3 145.578 51.7859  22
  -1 -16   3 109.071 22.4616  21
  -1 -16   3 103.597 19.6715  20
  -1  16  -3 76.5707 23.9201  22
   1  16   3 117.873 41.1692  14
  -1 -16  -3 127.841 39.0922  39
   1 -16  -3 163.123 39.6176  39
   1  16  -3 32.8718 51.7987  33
  -1  16   3 40.2835 42.1289  38
   1 -16  -3 120.923 27.6950  21
  -1  16  -3 36.8367 77.8751  33
   1  16   3 82.4162 26.8222  27
  -1 -16  -3 121.616 31.2335  21
  -1  16   3 159.283 44.6661  13
   1 -16   3 91.6391 22.0005  26
   1  16   3 59.7887 32.3450  13
   1 -16  -3 124.090 18.4093  12
   1  16  -3 42.2634 30.8183  31
  -1  16  -3 43.2251 32.3234  31
   1 -16   4-17.1131 19.2426  26
  -1  16   4-4.01923 31.3442  24
  -1  16  -4-13.8579 18.6269  19
   1  16   4-20.8604 35.6829  14
   1 -16   4-0.46808 12.7484  37
  -1  16   4-12.4213 48.9162  14
  -1  16  -4-52.4170 74.5306  23
   1 -16   4 2.88216 11.0277  42
  -1 -16   4 18.7837 18.4915  26
   1  16   4-14.7679 25.0278  27
   1  16   4 26.6990 34.9920  16
  -1 -16  -4-24.3863 28.7350  26
   1 -16  -4 10.5572 24.8237  21
  -1  16   4 22.4892 47.0176  16
  -1  16  -4 83.4555 145.698  15
   1 -16  -4-16.3584 26.1689  26
  -1 -16  -4 8.10608 27.4456  21
  -1 -16  -4 14.1836 36.1813  39
  -1  16   4 20.6192 49.4972  38
  -1  16   4 6.56284 34.7244  13
   1 -16  -4 3.92776 39.8491  39
  -1  16  -4-24.9376 73.5057  33
   1 -16   4-19.0284 18.8757  21
  -1 -16   4 4.28557 11.2902  42
   1  16   4-17.5937 39.3640  38
   1  16   4 8.33567 48.7117  22
  -1  16   4 14.3143 22.9650  36
  -1  16   4-32.2091 61.3962  22
   1  16  -4 2.18099 45.2295  33
   1 -16   4 18.6450 24.7409  17
   1  16  -4-1.60646 28.1135  31
   1  16   4-20.1991 28.5018  13
  -1 -16   4 15.6123 18.7811  21
  -1  16  -4 22.6446 28.8352  31
   1  16   4-6.14719 26.5585  24
  -1 -16   4 0.61697 16.7663  20
   1 -16  -4 8.88751 15.3312  12
   1  16   4-6.52113 21.3610  36
  -1 -16  -4 13.6551 17.9534  12
  -1 -16  -5 25.5498 19.5084  12
   1  16  -5 2.95233 33.0738  41
   1 -16   5 32.7210 12.5846  42
   1  16   5 36.4092 23.2987  24
  -1 -16   5 45.9316 23.3785  17
   1  16   5 7.09639 27.5715  27
  -1 -16   5 23.9531 18.7731  26
  -1  16   5 197.686 55.6176  14
  -1  16   5 144.367 57.1141  16
  -1 -16   5 19.7339 13.2451  42
   1 -16   5 62.2999 27.1084  17
   1  16  -5-10.6217 40.9939  15
   1  16   5 70.7025 49.4065  22
  -1 -16   5 35.0458 19.3081  21
  -1 -16  -5 54.6270 39.7595  39
  -1 -16   5 12.4486 16.5623  20
   1  16   5 14.4998 30.9872  14
   1  16   5 18.2213 32.5657  16
  -1  16  -5 24.0784 58.0150  23
   1  16   5 36.0343 24.5621  36
   1  16   5 48.2502 39.7310  38
  -1  16  -5-2.25041 57.0801  15
   1 -16   5-0.63833 16.5273  20
   1  16  -5-27.9821 44.5648  33
   1 -16   5 25.4993 13.1312  37
  -1 -16  -5 48.7482 27.7749  21
  -1  16  -5 37.1477 19.8225  19
  -1 -16  -5 43.4520 28.2320  26
  -1  16  -5 22.4437 27.0690  31
   1  16  -5 13.8252 26.3036  31
  -1  16  -5 31.9652 54.3277  33
   1 -16  -6 24.7265 39.0878  39
   1 -16   6 39.2507 27.1511  17
   1 -16   6 25.7237 15.1526  20
   1  16   6 30.2841 29.6901  27
  -1  16  -6-39.0474 47.9432  41
  -1 -16   6 37.7237 19.3774  26
  -1 -16  -6 71.3022 29.5433  26
   1 -16  -6 20.9335 28.6534  26
  -1  16  -6 36.0150 46.4897  15
   1  16   6 19.1057 32.2056  16
  -1  16   6 37.1314 39.6217  16
   1  16   6 43.0746 38.1577  38
  -1  16  -6 38.7360 20.5004  19
   1  16  -6 26.3306 32.7745  41
   1 -16   6 49.0795 14.7297  42
  -1 -16   6 23.7285 18.1309  21
  -1  16  -6 88.2683 46.1552  23
   1  16   6 45.0001 26.3821  13
  -1 -16  -6 52.9768 41.9484  39
  -1  16   6 39.1117 39.8053  14
  -1 -16  -6 43.9592 21.6327  12
   1 -16   6 32.0226 14.0139  37
  -1  16   6 13.1310 24.4807  24
   1  16   6 48.3665 32.0303  14
  -1  16   6 29.8619 33.2077  13
   1  16  -6-8.44966 39.3909  15
   1  16   6 7.75239 26.7941  36
  -1 -16  -6 95.1505 47.4656  28
  -1  16  -6 11.9901 48.8324  33
  -1 -16  -6 26.3349 28.1991  21
   1 -16  -6 25.8519 27.9353  21
  -1 -16   6 23.8340 13.4680  42
  -1 -16   6 49.5686 23.8808  17
   1  16  -6 20.1411 36.2577  23
  -1 -16   6 22.2820 17.1078  20
  -1  16   6 54.4550 35.2969  36
   1 -16  -6 43.4344 18.6039  12
   1 -16  -7 180.913 43.8575  39
  -1 -16  -7 285.690 52.6634  28
  -1 -16   7 254.480 30.4798  17
   1  16  -7 132.533 38.8871  23
  -1 -16   7 165.716 26.0821  26
   1 -16   7 177.210 23.0244  20
   1  16   7 109.103 31.4020  13
  -1  16   7 163.259 40.6526  16
  -1  16   7 186.398 43.5490  36
   1  16  -7 156.068 40.2905  15
  -1 -16   7 163.220 21.4202  42
  -1  16  -7 170.396 43.9985  41
   1  16  -7 139.780 37.1876  41
  -1  16  -7 178.172 45.1790  23
  -1  16   7 108.316 39.9697  14
   1  16   7 195.928 36.7597  36
  -1  16  -7 139.196 43.5070  33
   1 -16   7 315.833 35.3115  17
   1  16  -7 116.826 39.1800  33
  -1 -16  -7 203.763 28.4862  12
  -1  16  -7 131.558 25.8250  19
  -1  16   7 133.574 36.5471  13
  -1 -16   7 193.975 24.5400  20
  -1 -16   7 166.255 26.0028  21
   1 -16  -7 173.641 22.4827  19
  -1  16   7 198.565 29.7071  24
  -1 -16  -7 228.102 45.5377  39
  -1 -16   8 19.7487 19.5826  21
  -1  16  -8 56.2343 34.6867  41
  -1  16  -8 28.6876 21.7222  19
   1  16   8-13.8303 30.1978  36
   1 -16  -8 4.86126 15.9005  19
  -1 -16   8 51.1414 19.2082  20
  -1  16   8 48.3801 31.6940  13
  -1  16  -8 27.4824 33.2604  33
   1 -16  -8 19.6133 48.5786  28
  -1 -16   8 34.5954 19.8637  26
  -1  16   8 19.3712 38.1421  36
   1  16   8 15.7736 27.1386  16
   1  16  -8 34.5478 32.3331  23
  -1  16   8 71.1299 34.2363  16
   1  16  -8-9.51808 32.6675  33
  -1 -16  -8 129.122 47.6298  28
   1  16  -8 45.9784 32.1381  41
   1  16   8 42.8228 27.5027  14
  -1 -16  -8 9.58808 21.2427  12
  -1  16   8 20.2316 32.4596  14
  -1 -16   8 22.1916 15.5347  42
   1  16   8 83.1454 25.5636  13
  -1 -16  -8 10.2445 38.5454  39
   1 -16   8 35.0444 17.1052  20
  -1  16  -8 15.0270 34.6401  23
   1  16   9 1.21388 24.8538  14
   1  17   0 388.031 59.8482  13
  -1  17   0 381.279 51.8984  38
   1 -17   0 614.609 48.9711  12
   1 -17   0 711.601 53.4588  26
   1  17   0 507.181 72.3471  24
   1  17   0 522.074 56.1840  15
  -1  17   0 578.174 65.2586  15
   1  17   0 454.553 53.7161  38
   1  17   0 667.479 61.4932  22
  -1  17   0 434.677 58.8002  22
  -1 -17   0 568.272 54.6149  39
   1 -17   0 597.969 48.3356  20
   1 -17   0 665.795 53.4499  21
  -1  17   0 518.761 98.6355  31
  -1 -17   0 588.073 48.4712  20
  -1 -17   0 691.605 51.7025  12
  -1  17   0 621.349 99.9566  24
   1  17   0 686.546 94.7462  31
  -1 -17   1 35.9409 18.9490  20
   1 -17  -1 69.9651 26.2662  21
   1  17  -1 77.0887 22.9005  38
   1 -17   1 14.8489 24.6513  21
  -1  17  -1 24.0936 18.8657  19
  -1 -17   1 36.8770 23.6851  21
   1 -17   1 43.8981 22.0467  17
   1  17   1 61.9957 41.0742  24
   1  17   1 35.8705 21.4750  27
   1  17  -1 61.3624 36.6941  13
  -1  17   1 90.0519 83.1372  31
   1 -17   1 43.0520 24.9790  26
   1 -17  -1 41.0179 26.1765  26
  -1  17   1 47.2152 33.4682  15
  -1  17  -1 37.4347 24.7285  22
  -1 -17   1 54.6490 25.0882  26
   1 -17  -1 21.3898 15.0558  12
   1  17   1-12.6755 57.2648  31
   1  17  -1 82.3658 51.9480  24
  -1  17  -1 42.3654 21.5863  38
  -1  17  -1 59.7128 74.8226  24
  -1  17   1 53.1637 63.8439  24
   1  17   1 34.6467 25.0952  38
  -1  17  -1 126.081 50.7992  15
  -1 -17  -1 36.9771 26.0672  21
   1  17   1 26.6868 30.2281  22
   1  17   1 17.3329 33.6632  13
  -1  17   1 12.8652 27.5606  38
   1  17  -1 17.6797 24.7132  22
  -1 -17   1 43.0489 20.0007  17
   1 -17  -1 59.3228 19.2748  20
  -1 -17  -1 39.8886 27.1560  26
  -1 -17  -1 51.1421 31.5252  39
  -1  17  -1 18.8055 56.5954  31
  -1 -17  -1 24.6642 18.5441  20
   1  17  -1 62.5676 32.6774  15
   1  17   1 31.3029 25.7771  15
   1 -17   1 41.5710 18.4327  20
  -1 -17   1 51.8175 19.1199  12
  -1 -17  -1 37.4914 20.0296  12
  -1 -17  -2 9.58948 28.9637  26
   1  17  -2 31.4340 35.4626  15
   1 -17   2 24.1485 11.5207  42
  -1 -17   2 36.6478 21.7110  26
   1  17  -2-30.3582 52.7475  24
   1 -17  -2 50.8270 26.9467  21
  -1 -17  -2 31.0457 34.9374  39
  -1  17  -2 5.62052 66.9907  15
   1 -17   2 49.1782 25.5045  17
   1 -17   2 17.2838 21.6300  21
   1  17  -2 10.2430 23.4194  22
  -1  17   2-8.92637 35.5269  38
   1  17   2 3.54828 25.7242  38
  -1  17   2 56.6274 51.2312  22
  -1  17  -2 9.72117 25.4222  22
  -1 -17   2 13.4838 18.3335  20
  -1 -17   2 37.3546 21.7354  21
  -1 -17  -2 14.7075 18.4160  20
   1  17   2-8.99938 20.6889  36
   1 -17   2 28.0621 19.0466  20
   1 -17   2 27.6056 21.8392  26
   1 -17  -2 9.61979 25.9682  26
  -1  17   2 43.2640 47.7008  24
   1  17   2 12.9138 21.8705  27
  -1  17   2 13.7800 28.9763  15
  -1 -17   2 17.2999 12.2806  42
   1  17   2 35.5372 33.6167  13
  -1  17  -2 140.061 83.2030  33
   1  17  -2-2.36690 55.2283  33
  -1  17  -2 24.5003 19.2267  19
  -1 -17  -2 33.4485 29.3083  21
  -1  17  -2 14.7976 48.5906  31
   1 -17  -2 16.5782 14.9670  12
  -1 -17   2 42.4288 22.5246  17
   1  17   2 6.10777 58.5272  31
   1  17  -2 8.72468 33.7444  31
  -1 -17  -2 14.8421 18.8995  12
   1  17   3 51.1366 42.6344  14
  -1  17   3 42.9687 39.7944  24
  -1  17   3 19.0749 25.4626  15
   1 -17  -3 70.9776 28.0612  21
  -1 -17  -3 73.1030 37.5036  39
   1  17   3 34.5319 23.0841  36
   1  17   3 12.3409 41.6191  16
   1  17   3 35.6356 25.1295  27
   1 -17   3 78.1458 22.0243  21
   1 -17   3 45.2255 21.4831  26
  -1  17  -3 16.9653 18.6940  19
   1  17  -3 3.14999 38.8215  15
  -1 -17   3 49.6067 21.1572  26
   1 -17  -3 17.5893 39.6353  39
   1  17   3 37.8318 30.8162  24
  -1 -17   3 32.6900 20.3008  21
   1 -17  -3 51.8152 16.4163  12
  -1 -17  -3 30.2011 30.3389  26
   1 -17   3 47.2408 14.2408  37
  -1 -17  -3 34.9672 30.2150  21
   1  17   3 41.7836 34.8874  13
   1  17  -3-19.3091 53.6806  33
  -1  17  -3 27.0194 68.1109  15
  -1  17  -3-9.64937 35.7710  31
  -1  17   3 43.9121 43.1992  38
   1  17   3 21.5906 45.7990  22
  -1  17  -3 13.5683 22.8076  22
   1 -17   3 52.1175 25.5170  17
   1 -17   3 55.7683 13.4625  42
  -1 -17   3 55.0326 14.0468  42
  -1 -17   3 46.1214 18.3096  20
  -1  17   3 52.7674 60.9264  22
  -1  17   3 23.7593 45.8061  13
  -1  17  -3 90.1107 83.9525  33
   1 -17  -3 33.0851 27.6129  26
  -1 -17   3 66.6604 22.9051  17
   1  17  -3 15.3766 30.1327  31
  -1 -17  -3 80.5954 22.2204  12
  -1  17  -4 224.211 50.1136  31
   1  17   4 437.894 46.4035  36
  -1 -17   4 446.801 37.7319  42
   1  17   4 384.127 48.3451  27
   1 -17  -4 520.896 58.6807  39
   1 -17   4 476.599 41.7393  26
  -1  17  -4 397.002 41.1490  19
   1 -17   4 416.459 36.8700  37
  -1 -17  -4 495.593 56.9020  39
   1  17   4 337.085 54.5080  16
  -1 -17  -4 502.967 48.8905  26
   1  17  -4 259.587 48.3773  31
   1  17   4 530.155 70.2411  22
  -1 -17   4 582.254 48.5629  17
  -1 -17   4 412.662 40.2479  20
   1 -17  -4 482.050 48.3411  21
  -1  17   4 363.592 71.2485  38
   1  17   4 340.043 50.6591  13
   1  17   4 450.240 59.4479  38
  -1  17  -4 429.853 81.5819  15
  -1  17   4 269.791 82.5233  22
   1 -17   4 503.738 38.4401  42
  -1 -17   4 477.414 41.9147  21
   1 -17   4 462.313 41.2208  21
  -1 -17  -4 493.642 48.2978  21
   1  17   4 388.299 49.8893  24
   1  17   4 383.191 56.4952  14
  -1  17  -4 403.301 89.1123  33
  -1  17   4 320.423 59.1254  13
   1 -17   4 700.087 52.4898  17
   1  17  -4 253.499 62.7007  33
   1 -17  -4 448.698 41.5345  12
  -1  17   4 506.228 56.9770  24
  -1 -17   4 497.925 42.2556  26
   1 -17  -4 398.171 47.5803  26
  -1 -17  -5 39.6566 22.9897  12
   1 -17  -5-22.8648 44.6682  39
   1  17   5 24.7385 25.5838  36
  -1 -17   5 21.0598 25.1335  17
  -1  17   5 35.1745 31.7817  24
   1  17   5 8.21206 50.3211  22
   1  17   5 17.9872 28.7000  27
  -1 -17   5 7.54044 16.9008  20
  -1 -17   5 6.74075 18.2886  26
  -1 -17  -5 1.93185 31.3406  26
   1  17   5 28.3522 34.0239  16
  -1  17  -5 20.5809 56.2554  15
   1 -17  -5 17.9662 18.8632  12
   1 -17   5 17.5182 13.8905  42
   1  17  -5 20.9814 41.9614  33
   1  17  -5-3.08164 42.4999  15
  -1  17  -5 16.3625 59.0123  23
  -1  17  -5 3.09226 59.8674  33
  -1  17  -5 6.81062 19.9324  19
   1  17  -5-16.2475 40.8032  23
   1  17   5-12.5194 30.3637  13
   1  17   5 2.34145 39.2872  38
  -1  17   5 4.54942 39.0416  13
  -1 -17   5 18.4927 19.3671  21
   1 -17   5 29.4385 14.3895  37
  -1 -17  -5 32.7446 30.9894  21
  -1  17   5-20.2845 52.9266  16
   1 -17   5 30.7306 30.0652  17
  -1  17   5 31.5664 55.6449  38
  -1  17   5 47.9108 50.1499  14
   1  17   5 35.3198 24.3994  24
  -1 -17  -5 17.9898 39.8264  39
   1  17   5-7.52162 33.5066  14
  -1 -17   5 22.2822 13.8712  42
  -1  17  -5 5.53172 28.3962  31
   1  17  -5 24.6384 28.5648  31
  -1 -17   6 8.69843 13.9303  42
   1  17   6 15.8930 31.8935  16
  -1  17   6 28.8460 26.5446  24
   1 -17   6 21.3834 15.0888  42
   1 -17   6 35.9474 28.3735  17
   1 -17  -6 63.7452 45.5138  39
   1  17   6-6.43032 38.7049  38
   1  17   6 10.5390 33.7208  14
  -1 -17   6 19.5425 19.8102  26
  -1 -17  -6 3.63703 30.1190  26
   1 -17  -6-1.02431 30.2688  26
  -1  17   6 31.9645 44.2723  16
   1 -17  -6 6.13032 30.2673  21
   1 -17  -6 26.3123 18.9190  12
   1  17  -6-28.0715 35.0598  41
  -1 -17  -6 25.3876 30.0344  21
  -1 -17  -6 12.7021 21.6440  12
  -1 -17   6 33.4327 17.3564  20
  -1  17  -6 7.85776 20.8367  19
  -1  17   6 59.0657 44.8078  14
   1 -17   6 8.94600 16.2957  20
   1  17  -6 44.0166 40.9361  33
   1  17  -6-19.7324 39.2911  15
  -1  17  -6-36.7589 49.9473  23
   1  17   6-9.15870 27.9844  36
  -1 -17   6 13.5646 19.6674  21
   1  17  -6-20.4167 38.2910  23
  -1  17   6-12.5632 36.0044  13
   1  17   6 36.9880 30.0761  27
  -1 -17   6 55.6448 24.8117  17
  -1 -17   7 82.5845 24.7820  17
  -1 -17   7 11.9151 15.0278  42
   1 -17   7 63.4284 29.2004  17
  -1 -17  -7 24.1988 46.6766  28
  -1  17  -7 26.6735 38.9664  33
  -1  17   7 131.236 27.8084  24
   1  17   7 22.8930 29.2836  36
   1 -17  -7 5.73652 29.1181  26
   1  17   7 28.8827 28.5645  16
  -1  17   7 82.5525 45.5818  16
   1  17   7 45.8947 27.0420  13
  -1 -17  -7 41.0398 21.5016  12
   1 -17  -7 8.58299 28.7199  21
  -1 -17  -7 56.3962 42.9000  39
   1  17  -7 31.2330 32.8932  41
  -1  17  -7 44.3204 42.5636  23
   1 -17  -7 67.8920 42.6830  39
  -1 -17   7 28.8131 18.4934  20
   1 -17   7 39.8996 17.4398  20
   1  17   7 44.7140 31.3919  14
   1  17  -7 18.2897 35.7400  15
  -1 -17   7 28.6369 20.0642  21
  -1  17   7-15.0030 33.1852  13
  -1  17   7 23.4779 44.8193  14
  -1 -17   7 37.9669 20.6297  26
  -1  17  -7 21.0145 22.1086  19
   1 -17  -7 12.5358 16.9673  19
   1  17  -7 46.0853 34.2949  23
   1  17  -7-27.8075 35.5164  33
  -1  17  -8 182.656 40.5738  41
   1 -17  -8 258.659 45.8175  39
   1  17  -8 182.284 40.6454  23
  -1  17  -8 211.690 43.3594  23
   1 -17  -8 221.580 25.4644  19
   1 -17  -8 279.038 35.1335  26
  -1 -17   8 233.667 27.3563  20
   1  17   8 239.201 33.0209  13
  -1 -17   8 206.373 28.4697  21
  -1 -17  -8 74.2455 29.7737  12
  -1  17  -8 189.460 29.1402  19
  -1 -17   8 226.395 24.5832  42
  -1  17   8 170.725 36.8538  13
  -1  17   8 184.006 41.3608  14
  -1 -17   8 168.347 27.7752  26
  -1  17   8 148.441 39.4973  16
   1 -17   8 240.616 26.0529  20
   1 -17  -8 251.415 34.1822  21
  -1  17  -8 154.501 41.9137  33
   1  17  -8 202.848 38.9773  41
  -1 -17  -8 320.714 46.2781  39
   1  17  -8 141.174 40.0193  33
  -1 -17  -8 258.045 50.4704  28
  -1  18   0 73.5315 86.2220  24
   1  18   0 30.9449 23.7818  38
  -1 -18   0 9.31516 29.3162  39
   1 -18   0 41.5796 26.2308  26
   1 -18   0 49.9082 26.3957  21
  -1  18   0 13.5977 30.5913  22
  -1  18   0 100.896 89.7706  31
  -1 -18   0 30.9893 20.3468  20
  -1  18   0 5.03071 23.8600  38
   1  18   0 28.9932 30.3530  22
   1  18   0 9.09667 51.5793  31
   1  18   0 41.5499 37.6157  13
   1 -18   0 34.3978 17.1130  12
   1 -18   0 29.1267 20.2870  20
   1  18   0 20.2867 30.5614  15
   1  18   0 45.6871 45.8965  24
  -1  18   0 93.5787 45.1316  15
  -1 -18   0 21.8505 20.4499  12
   1  18  -1 46.5141 31.5494  22
   1  18  -1 107.222 50.0636  31
  -1  18  -1 60.7633 32.1232  22
  -1  18  -1 72.2307 25.4780  38
  -1  18   1 139.849 39.7299  15
   1 -18   1 136.474 28.0916  17
   1  18   1 73.2909 24.8077  27
  -1 -18   1 90.5201 23.0811  20
   1  18  -1 83.0479 34.5808  15
  -1  18  -1 116.842 24.1056  19
   1  18   1 115.776 62.4931  31
  -1 -18  -1 166.932 36.7060  39
   1 -18   1 117.667 28.2357  26
  -1 -18  -1 183.942 33.2376  26
   1 -18  -1 108.876 30.6318  26
   1  18  -1 100.808 51.6510  24
  -1  18  -1 133.482 54.8630  15
  -1  18  -1 19.6725 82.8703  24
   1  18   1 145.057 37.9925  22
  -1 -18  -1 163.694 25.7681  12
  -1  18   1 134.367 74.1364  24
  -1 -18   1 99.0404 28.0851  26
   1  18   1 121.792 30.6316  15
  -1 -18  -1 109.375 32.0872  21
   1 -18  -1 151.615 22.4370  12
  -1  18   1 119.076 33.4085  38
   1 -18  -1 152.306 31.5060  21
  -1  18  -1 97.6870 68.6073  31
   1  18   1 122.725 44.4007  24
  -1 -18   1 106.249 28.5392  21
   1  18   1 96.0817 39.2944  13
   1 -18   1 143.918 22.8679  20
   1  18  -1 36.5333 24.3877  38
   1 -18   1 147.697 29.2532  21
  -1 -18   1 145.833 25.0833  17
  -1 -18  -1 136.785 23.4306  20
   1 -18  -1 114.154 23.8287  20
   1  18   1 91.4823 30.7283  38
  -1  18   1 151.530 96.9651  31
   1 -18   1 116.751 20.8174  12
  -1  18   2 7.42511 52.9606  24
  -1  18   2 34.5828 31.8730  15
   1  18  -2 55.9643 37.8260  15
  -1  18  -2 3.48814 24.8355  22
  -1 -18   2 4.64384 23.6698  26
   1 -18   2 30.5457 23.8947  21
   1  18   2 34.8251 36.0332  13
   1 -18   2 29.5147 26.7132  17
   1 -18   2 34.9236 23.7723  26
  -1 -18  -2 35.0853 31.8813  21
   1 -18  -2 12.4821 29.9193  26
   1  18   2 33.3703 23.7962  27
   1 -18  -2 40.4484 29.8326  21
   1 -18   2 41.0290 14.3706  42
  -1 -18   2 34.2596 24.1637  21
  -1 -18  -2 51.7729 31.4578  26
   1  18  -2 71.5600 38.8231  31
   1 -18   2 37.3204 14.8496  37
   1 -18  -2 29.0311 20.4281  20
  -1  18   2 40.8356 54.8765  22
   1  18   2 24.5929 29.0049  38
   1  18  -2 3.13516 25.2087  22
   1 -18   2 40.4648 20.0618  20
   1 -18   2 32.9093 16.5894  12
  -1 -18   2 58.6277 23.1401  17
  -1 -18   2 16.5651 19.7598  20
  -1  18  -2-9.87500 51.0511  31
   1  18  -2 17.9136 50.1629  24
  -1 -18  -2 34.7352 20.2949  20
  -1 -18   2 30.5295 13.8240  42
  -1  18  -2 50.3823 20.9110  19
   1  18   2 40.1018 58.8868  31
  -1 -18  -2 59.4388 23.2511  12
  -1 -18  -2 129.731 39.1451  39
  -1  18  -3-5.30746 37.6114  31
   1  18   3 51.8632 46.4739  22
  -1  18   3-35.6202 51.3699  24
   1  18  -3-23.0953 39.2346  31
   1 -18   3 0.80598 21.4709  21
   1 -18   3 11.1369 13.3401  42
   1 -18   3 6.10652 27.8715  17
  -1 -18   3-41.5762 29.3856  17
   1 -18  -3-10.1766 19.2232  12
  -1 -18  -3 23.1348 32.4005  26
   1  18   3 20.9437 42.0142  16
   1  18  -3 778.497 65.9154  15
   1 -18   3 10.0274 14.6999  37
   1  18   3-12.4989 43.7190  14
  -1 -18   3 949.713 45.4896  20
  -1  18   3-38.0328 51.6320  38
   1 -18  -3 6.56133 41.1161  39
   1  18   3-15.9633 31.6533  24
  -1 -18  -3 2.31802 22.4037  12
  -1 -18  -3-52.8420 42.4469  39
  -1  18  -3-8.11360 24.0690  22
  -1  18  -3-7.78334 21.1567  19
  -1  18   3-62.0430 61.0969  13
   1  18  -3-49.5052 57.0474  33
   1 -18   3 9.70146 21.9762  26
  -1  18   3-72.2976 76.5453  22
   1 -18   3 4.99129 19.9575  20
   1  18   3-1.27360 23.7865  36
   1 -18  -3-32.3316 32.8182  21
  -1  18  -3-24.9176 82.9546  33
   1  18   3 11.5728 25.0561  27
   1  18   3-29.0416 36.3634  13
  -1  18  -3-55.1905 67.5353  15
  -1 -18  -3 10.4803 31.7705  21
   1 -18  -3-9.72881 31.5788  26
  -1  18   3-27.4317 30.6234  15
  -1 -18   3 35.0724 17.5832  42
  -1 -18  -4 29.8137 43.3685  39
   1  18   4 13.6649 37.9817  38
  -1  18   4 4.75569 39.1876  24
  -1  18   4-45.4398 81.3422  22
   1 -18  -4 1.09219 33.4059  21
  -1 -18   4-2.72500 24.3984  17
   1 -18   4 10.6078 14.1971  37
  -1  18  -4-19.9934 35.0410  31
   1  18   4 28.5259 28.3888  27
  -1  18  -4 28.0258 64.1919  15
   1 -18   4 20.7751 14.4837  42
   1  18   4 11.2820 49.1017  22
  -1  18  -4 60.8990 73.5717  33
   1  18   4-8.06086 37.7506  16
   1 -18   4 50.8121 29.1443  17
  -1  18   4 16.4587 54.9985  38
  -1 -18   4 0.69024 18.9635  20
   1  18   4 47.9274 34.0300  13
  -1 -18   4 21.1890 21.6289  26
   1  18   4 12.3183 24.8800  36
   1  18   4 14.0304 37.1381  14
   1 -18  -4-9.93338 45.3701  39
  -1 -18  -4 14.5040 33.3373  26
   1  18   4-1.72731 28.5845  24
  -1 -18   4 1.76128 20.9605  21
  -1  18   4-18.7082 48.0852  13
  -1 -18  -4 2.06583 33.0633  21
  -1 -18   4 16.8403 13.7308  42
   1  18  -4 75.2140 52.4755  33
  -1  18  -4-13.1517 21.1666  19
   1 -18  -4-5.47635 32.6732  26
   1  18  -4 26.3979 30.7656  31
   1 -18  -4 4.01981 18.3046  12
  -1 -18  -5 319.082 54.7662  39
   1 -18  -5 377.753 55.8174  39
   1  18  -5 398.375 61.8509  33
  -1 -18  -5 397.460 39.2280  12
   1  18   5 211.818 41.4162  27
  -1 -18  -5 325.194 43.1686  26
  -1 -18   5 282.358 34.5949  26
  -1  18  -5 881.362 89.9709  33
   1  18   5 220.847 46.8552  16
  -1 -18   5 273.592 29.7463  42
   1 -18   5 340.280 31.5205  42
  -1 -18   5 261.638 34.2454  21
   1  18   5 242.295 43.6049  13
   1  18  -5 573.182 61.7948  23
  -1  18   5 247.018 69.2203  38
   1  18  -5 354.178 53.3071  15
   1  18   5 225.860 51.4253  38
  -1 -18   5 395.359 41.4366  17
   1  18   5 302.864 48.6042  14
  -1  18   5 309.795 45.1991  24
   1  18   5 219.761 39.2277  36
  -1 -18  -5 272.418 42.3578  21
  -1 -18   5 306.535 32.1071  20
  -1  18  -5 490.558 72.2371  15
  -1  18   5 318.300 55.2153  13
   1  18  -5 212.116 45.5266  31
   1  18   5 290.523 40.1636  24
  -1  18  -5 235.675 35.6424  19
   1 -18  -5 368.586 35.6447  12
  -1  18  -5 669.492 53.2572  31
   1  18   5 445.995 64.7285  22
   1 -18  -6 4.54156 19.4326  12
  -1 -18  -6 45.9090 31.8427  21
   1  18  -6-1.65988 39.1461  23
   1  18   6 5.14335 32.2655  14
  -1 -18   6 10.8185 15.1365  42
   1  18   6-19.1981 30.3993  36
   1 -18   6 30.0765 29.0254  17
  -1  18  -6-39.7170 51.7798  23
   1  18  -6-17.9548 39.4488  15
   1 -18   6-16.5081 17.4082  42
  -1 -18   6 36.3306 20.8409  26
   1 -18  -6 18.6408 31.7291  26
  -1 -18  -6 7.31381 24.6460  12
  -1 -18   6-6.04202 19.9825  21
   1  18   6 5.16819 32.0715  16
  -1  18   6 22.4528 44.8298  14
  -1 -18  -6-20.2609 31.6344  26
  -1  18  -6 17.7225 21.9789  19
  -1 -18   6 10.7050 18.3498  20
   1  18   6 132.965 51.6019  38
  -1  18   6 49.1119 28.2129  24
  -1 -18   6 14.8243 24.4010  17
   1 -18  -6 12.3930 31.7331  21
   1 -18  -6 26.5532 45.5972  39
  -1  18   6 27.0644 44.0388  16
  -1  18   6-29.8226 36.6175  13
  -1  18  -6 40.0835 48.9166  33
   1  18  -6 32.7287 39.1670  33
   1 -18  -7 27.2099 30.3362  26
   1  18   7-1.52172 29.9460  14
   1 -18   7 32.0140 27.8157  17
  -1 -18  -7 38.6758 42.0378  39
  -1 -18   7 35.2570 21.0126  26
   1 -18  -7 44.8695 42.6018  39
   1  18   7 42.8031 30.9559  16
  -1 -18   7-6.53215 24.4693  17
  -1  18   7 19.0635 38.8480  16
  -1  18   7-2.32398 22.0314  24
  -1 -18   7 16.8386 15.4281  42
  -1  18   7-9.19537 32.8845  13
  -1  18   7-11.3909 41.1869  14
  -1  18  -7 29.2911 40.9806  23
   1  18  -7-9.37887 34.5992  15
  -1 -18   7 17.5995 21.0145  21
   1  18   7-5.73584 27.7833  36
   1 -18  -7 21.5206 31.0129  21
  -1 -18   7 16.1700 18.6039  20
   1 -18  -7 24.1147 16.0259  19
  -1  18  -7 17.3506 22.7427  19
   1  18  -7 53.4084 36.3182  23
  -1 -18  -7 19.7279 21.6610  12
   1  18   7 36.9778 28.1137  13
   1  19   0 4.69058 25.3578  38
   1  19   0-67.1467 42.7930  13
  -1  19   0 4.87613 37.3487  22
  -1  19   0 21.8372 90.8533  24
   1  19   0 8.05080 31.1193  22
   1 -19   0-5.06438 29.9759  26
  -1  19   0-32.8775 49.3175  15
   1  19   0 12.5378 29.9730  15
   1  19   0-27.0189 46.7838  24
   1  19   0-21.8774 53.9180  31
   1 -19   0 29.8165 21.0469  20
   1 -19   0-14.1310 29.0645  21
   1 -19   0 42.3454 18.9951  12
  -1 -19   0 14.5106 21.5909  20
  -1  19   0 35.4167 28.1787  38
  -1  19   0-5.73920 98.2801  31
  -1 -19   0 8.80768 21.7511  12
   1  19  -1 624.670 82.4060  24
  -1  19  -1 453.340 102.484  31
   1 -19  -1 834.228 66.4298  26
  -1 -19   1 882.765 63.5697  17
   1 -19   1 806.575 61.1652  12
  -1  19  -1 618.944 84.8806  15
   1 -19   1 787.317 56.9395  42
   1 -19  -1 699.711 59.5171  20
   1 -19   1 828.504 64.6944  26
  -1 -19  -1 758.701 66.6079  26
  -1 -19  -1 877.101 64.4352  12
   1  19  -1 427.469 64.7383  22
   1  19  -1 476.818 80.6341  31
  -1 -19   1 807.830 64.4289  26
   1  19   1 527.999 88.6183  31
   1  19  -1 667.964 68.3035  15
   1  19   1 630.333 63.8641  15
  -1  19   1 611.605 71.4930  15
  -1 -19   1 747.918 56.7928  42
   1  19   1 577.854 71.4453  22
  -1 -19  -1 853.211 68.9911  39
  -1 -19   1 804.884 59.5489  20
  -1  19   1 454.630 68.2538  38
   1 -19   1 979.907 65.9977  17
   1  19  -1 451.819 61.5050  38
   1  19   1 441.659 64.6233  38
  -1  19   1 893.635 115.523  24
   1 -19   1 774.552 60.1558  20
  -1 -19  -1 775.360 67.0454  21
   1  19   1 483.178 71.1775  13
  -1  19  -1 413.479 66.3916  22
  -1  19   1 892.954 137.141  31
  -1 -19  -1 704.414 59.5269  20
   1 -19  -1 735.609 60.9396  12
   1 -19   1 777.417 63.6500  21
  -1 -19   1 821.790 64.5056  21
   1  19   1 636.609 78.1061  24
   1 -19  -1 839.984 66.4162  21
   1 -19  -2 380.553 44.6543  26
   1  19  -2 265.883 46.8168  15
  -1 -19   2 373.548 37.6734  17
   1 -19   2 306.123 37.3200  26
   1  19   2 208.907 42.0880  38
  -1  19   2 305.935 69.7379  24
   1 -19   2 316.192 29.2801  37
  -1 -19   2 322.120 37.6627  26
  -1 -19   2 302.394 29.4891  42
  -1 -19  -2 316.940 44.0995  26
   1 -19   2 360.515 34.3759  12
  -1  19  -2 146.882 39.3313  22
   1  19  -2 180.720 56.1517  24
  -1  19   2 187.803 42.6463  15
  -1 -19   2 302.385 33.1577  20
   1  19  -2 228.239 39.7554  22
   1 -19  -2 326.341 43.8027  21
   1 -19   2 351.463 37.2213  21
  -1  19   2 212.751 67.6316  22
   1  19   2 278.993 50.8740  24
   1 -19   2 345.724 29.9171  42
  -1 -19   2 329.014 37.3973  21
[truncated: 1,237,666 more chars]
