# Supplementary material for: Relatively oxidized conditions for diamond formation at Udachnaya (Siberia)
Source: Copernicus journal article supplement (doi:10.5194/ejm-34-549-2022), 2022-11-15
Supplement: Supplementary file 1 [file Supplementary File_Tables S1-S2.xlsx]

## Sheet: Table S1 Liu et al 2022
Relatively oxidized conditions for diamond formation at Udachnaya (Siberia)
Luca Faccincani 1, Valerio Cerantola 2,3, Fabrizio Nestola 4, Paolo Nimis 4, Luca Ziberna 5,6, Leonardo Pasqualetto 4, Aleksandr I. Chumakov 3, Jeffrey W. Harris 7, Massimo Coltorti 1
1 Department of Physics and Earth Sciences, University of Ferrara, Via Saragat 1, 44121 Ferrara, Italy
2 Department of Earth and Environmental Sciences, Università degli Studi di Milano-Bicocca, Piazza della Scienza 4, 20126 Milan, Italy
3 ESRF – The European Synchrotron, CS40220, 38043 Grenoble Cedex 9, France
4 Department of Geosciences, University of Padua, Via Gradenigo 6, 35131 Padua, Italy
5 Department of Mathematics and Geoscience, University of Trieste, Via Weiss 2, 34128 Trieste, Italy
6 Bayerisches Geoinstitut, University of Bayreuth, Universitätsstraße 30, 95440 Bayreuth, Germany
7 School of Geographical and Earth Sciences, University of Glasgow, G12 8QQ Glasgow, UK
Correspondence to: Luca Faccincani (luca.faccincani@unife.it)
Table S1. Major element compositions for minerals (wt.%) and P-T estimates for the new suite of garnet peridotite xenoliths from Liu et al. (2022) and from the literature (Ionov et al., 2010, 2017, 2020; Doucet et al., 2013, 2014; Agashev et al., 2013), with P-T estimates from Liu et al. (2022). We report only the P-T estimates considered as robust (84 xenoliths) and disregard the other data in v…
			Modal composition							P(GPa)	T (°C)	P(GPa)	T (°C)	P(GPa)	T (°C)	P(GPa)	T (°C)	P(GPa)	P(GPa)	T (°C)	T (°C)	T (°C)	Olivine															Opx			Orthopyroxene
Sa.No.	Rock type	Texture	Ol	Opx	Cpx	Gar	Spl	Opx type	Disequilibr.	Robust	Robust	NG85	TA98	CA91-TTA98	TTA98-PCA91	Corrected for Na-rich	Corrected for Na-rich	NT00	SY21	NG10	NT00	BK90c	Sa.No.	SiO2	TiO2	Al2O3	Cr2O3	FeO	MnO	NiO	MgO	CaO	Na2O	Total	Mg#			Sa.No.	SiO2	TiO2	Al2O3	Cr2O3	FeO	MnO	NiO	MgO	CaO	Na2O	K2O
426-09	Hz	Incipient	76.28	19.62	0.18	3.92	-	normal	-	6.23185	1282.47	6.23185	1282.47	-	-	-	-	6.26871	6.76714	1226.32	1268.04	1282.24	426-09Ol av 7	40.4932	0.00707143	0.0136	0.0529571	8.2763	0.119	0.4113	50.1751	0.0474	0.0102857	99.6063	0.915303			426-09Op av 4	57.6645	0.015	0.456	0.31375	4.8715	0.1305	0.15175	35.526	0.9675	0.12225	0.0025
529-10	Dunite	Coarse	99.5	tr.	tr.	tr.	0.5	normal	-	5.79196	1057.92	5.79196	1057.92	-	-	-	-	5.34792	5.71469	1031.73	966.823	995.679	529-10 Ol av 8	41.2999	0.00145714	0.0019	0.0300714	7.4358	0.102929	0.370714	50.8306	0.00978571	0.00171429	100.086	0.92416			529-10Op av 5	58.1755	0.00566667	0.379167	0.292	4.451	0.122667	0.0933333	36.4628	0.343	0.0563333	0.002
545-10	Hz	Coarse	70.71	22.72	1.36	5.21		normal	-	4.11645	834.837	4.11645	834.837	-	-	-	-	3.78787	4.08039	837.426	783.217	903.332	545-10Ol av 8	41.3531	0.0033375	0.0014125	0.0091	7.79714	0.091975	0.416338	50.6548	0.0058875	0	100.334	0.920513			545-10Op av 8	58.0403	0.002875	0.522125	0.23125	4.71975	0.112	0.088375	35.8282	0.33025	0.01575	0.00075
552-10	Wehrlite, phl	Coarse	56.04	0	13.76	30.2		Na-rich	-	4.16597	829.199	4.08149	826.913	4.25044	831.486	4.16597	829.199	3.39546	4.13787	859.379	808.798	836.329	552-10Ol av 8	41.0388	0.01235	0.00173333	0.00413333	8.53923	0.0851833	0.391283	49.9041	0.00671667	0.00735	99.9911	0.912416			552-10Op av 7	57.9309	0.0821429	0.388286	0.0642857	5.05929	0.0951429	0.0982857	35.7739	0.248286	0.0697143	0.0022
565-10	Hz	Coarse	81.68	15.39	0.87	2.06		normal	-	3.38733	773.876	3.38733	773.876	-	-	-	-	3.72174	4.07691	796.905	756.626	850.974	565-10Ol av 8	41.2523	0.0032	-7.5e-05	0.0081125	7.80126	0.09535	0.406263	50.6522	0.0051125	0.0015875	100.227	0.92047			565-10Op av 8	57.7909	0.005875	0.66625	0.269	4.7515	0.112	0.086625	35.7175	0.310375	0.03825	0.00075
584-10	Hz	Coarse	81.36	13.04	1.1	4.49		normal	-	3.36978	790.084	3.36978	790.084	-	-	-	-	3.35481	3.5948	767.307	765.202	860.084	584-10Ol av 8	41.2875	0.0041	0	0.004975	7.61934	0.0919	0.401813	50.5669	0.005325	0	99.9828	0.922059			584-10Op av 8	57.6872	0.010625	0.65675	0.2435	4.682	0.1085	0.088375	35.7695	0.323625	0.050625	0.001125
40-11	Hz, phl	Coarse	67.36	27.97	3.14	1.54		Na-rich	-	5.23005	965.667	4.99275	958.632	5.46735	972.702	5.23005	965.667	4.90016	5.19879	914.554	930.843	936.581	40-11Ol av 8	40.6903	0.01565	0.0037	0.037575	7.87263	0.122375	0.341587	50.4165	0.0143875	0.011125	99.5258	0.919459			40-11Op av 2	58.1225	0.019	0.3135	0.262	4.5615	0.1285	0.091	35.965	0.3145	0.1415	0.0005
58-11	Hz	Incipient	79.13	17.28	0	3.59		normal	-	6.67329	1300.91	6.67329	1300.91	-	-	-	-	6.41911	7.11201	1316.38	1283.07	1306.65	58-11Ol av 8	41.0187	0.0052875	0.01295	0.0347625	8.65358	0.107713	0.3983	50.109	0.04995	0.005675	100.396	0.911678			58-11Op av8	57.9174	0.00975	0.449125	0.1935	5.0435	0.113125	0.125875	35.1572	0.9835	0.0495	0.001625
122-11	Hz	Incipient	70.85	25.56	1	2.59		Na-rich	-	6.33498	1316.52	6.04771	1305.88	6.62224	1327.17	6.33498	1316.52	6.6119	7.32551	1256.28	1298.72	1307.04	122-11Ol av 8	40.7758	0.027675	0.021475	0.0577875	8.8143	0.113712	0.377225	50.0047	0.0545	0.020025	100.267	0.910014			122-11Op av 7	57.4304	0.105429	0.557429	0.297143	5.18471	0.118	0.130571	34.5394	1.08643	0.201143	0.00157143
155-11	Hz	Transitional	77.97	14.18	1.71	6.14		normal	-	6.25763	1277.06	6.25763	1277.06	-	-	-	-	6.39851	7.0882	1254.91	1263.45	1283.47	155-11Ol av 8	40.9199	0.0054375	0.0131125	0.0403625	8.57374	0.116675	0.422662	50.2375	0.0479375	0.0094125	100.387	0.912625			155-11Op av6	57.5573	0.00433333	0.458333	0.209333	5.0165	0.121833	0.126667	35.194	0.963333	0.0846667	0.00116667
44-12	Hz	Coarse	78.79	18.08	0.73	1.53	0.87	normal	-	2.75231	774.153	2.75231	774.153	-	-	-	-	2.8824	3.14205	715.204	728.838	862.961	44-12Ol av 8	40.9491	0.0024375	0.0007625	0.00195	7.50609	0.093725	0.403825	50.9387	0.0041625	0	99.9016	0.923647			44-12Op av 8	57.3101	0.00425	1.02012	0.30275	4.741	0.11275	0.073625	35.6276	0.37625	0.021	0.001375
107-12	Lh cp,gar-rich, phl	Coarse	65.9	8.95	12.37	12.77		normal	-	4.10364	826.719	4.10364	826.719	-	-	-	-	3.75873	4.39037	866.311	805.585	884.386	107-12Ol av 8	40.3935	0.00881429	0.00138571	0.00571429	9.07287	0.0927714	0.355514	49.772	0.00658571	0.0013	99.7117	0.907226			107-12Op av 7	57.7447	0.0865714	0.411571	0.125143	5.418	0.106714	0.0784286	35.2769	0.303714	0.0762857	0.000285714
108-12	Hz	Transitional	77.77	19.76	0	2.47		normal	-	6.46912	1324.34	6.46912	1324.34	-	-	-	-	6.44444	6.9565	1275.24	1311.95	1328.39	108-12Ol av 8	40.7924	0.00482857	0.0163	0.0599143	8.5351	0.100757	0.364857	50.2129	0.0594	0.0098	100.156	0.912946			108-12Op av 7	57.6287	0.0132857	0.478714	0.273286	4.88243	0.103	0.118286	34.9101	1.09843	0.077	0.00114286
06-13	Lh	Sheared	81.77	9.72	7.71	0.8		Na-rich	-	5.92006	1239.18	5.16768	1212.39	6.67243	1265.97	5.92006	1239.18	7.61467	8.9377	1196.02	1203.62	1224.49	6-13Ol av 8	40.0952	0.0402143	0.0191143	0.0148	12.3526	0.132186	0.266643	47.1308	0.0450429	0.0208	100.117	0.871818			6-13Op av5	57.2242	0.179333	0.580833	0.1135	7.54517	0.136833	0.0768333	33.2638	0.93	0.218	0.00233333
52-13	Hz	Transitional	77.78	18.95	0.4	2.87		normal	-	6.41604	1312.69	6.41604	1312.69	-	-	-	-	7.22011	7.95587	1321.81	1301.04	1286.48	52-13Ol av 8	40.9074	0.011975	0.0128125	0.063725	8.2533	0.112738	0.39925	50.2912	0.045125	0.0165375	100.114	0.915698			52-13Op av8	57.0343	0.054	0.46225	0.4035	5.3505	0.12225	0.1295	34.944	0.94425	0.16	0
64-13	Hz	Coarse	79.12	16.11	1.44	3.33		normal	-	4.01369	885.806	4.01369	885.806	-	-	-	-	4.29801	4.69251	924.832	854.189	898.128	64-13Ol av 8	41.032	0.0038	0.0004375	0.0086375	7.68682	0.0973875	0.395225	50.8657	0.0047375	0.0002	100.096	0.92185			64-13Op av6	57.1392	0.00233333	0.637714	0.262286	5.1815	0.118833	0.0813333	35.746	0.328	0.0225714	0
65-13	Hz altered	Coarse	83.9	11.61	0.67	3.82		normal	-	3.92121	866.161	3.92121	866.161	-	-	-	-	4.30649	4.71021	871.671	852.065	847.516	65-13Ol av 8	41.0208	0.00375	-0.0003125	0.008425	7.57999	0.090825	0.404675	50.9201	0.0055375	0	100.035	0.92293			65-13Op av4	58.7463	0.006	0.656	0.28375	4.9795	0.11325	0.08375	35.556	0.2735	0.02725	0.004
72-13	Hz	Coarse	88.97	6.56	0.33	4.14		normal	-	5.3095	976.016	5.3095	976.016	-	-	-	-	7.13719	8.36586	1036.4	946.707	949.184	72-13Ol av 8	40.7591	0.0062375	0	0.0085	7.72115	0.079925	0.339888	50.7027	0.006625	0.0012	99.6269	0.921294			72-13Op av6	58.2327	0.0054	0.339333	0.285667	4.83467	0.115167	0.101	35.874	0.310667	0.083	0
87-13	Hz	Transitional	75.34	20.94	0	3.73		normal	-	7.04587	1363.41	7.04587	1363.41	-	-	-	-	6.75544	7.36124	1371.03	1348.71	1352.61	87-13Ol av 7	40.9152	0.00395714	0.0156429	0.0545143	8.16054	0.120014	0.365943	50.242	0.0536857	0.00357143	99.9351	0.916492			87-13Op av8	57.9249	0.00485714	0.443375	0.274	4.92587	0.131875	0.120625	34.9922	1.09963	0.044	0
89-13	Hz gar-rich	Coarse	71.1	22.44	0.79	5.67		normal	-	4.35517	896.191	4.35517	896.191	-	-	-	-	4.4488	4.84787	899.557	861.596	928.048	89-13Ol av 8	40.8453	0.0028625	0.0010625	0.0110375	7.61337	0.089925	0.419925	50.6694	0.00545	3.75e-05	99.6591	0.922262			89-13Op av8	58.1201	0.0038	0.555125	0.274	4.8395	0.110125	0.08975	35.483	0.347714	0.0248571	0
147-13	Hz	Transitional	82.94	12.38	0.52	4.16		Na-rich	-	6.68191	1331.01	6.07809	1308.61	7.28573	1353.41	6.68191	1331.01	10.6764	12.9523	1256.66	1298.46	1280.01	147-13 Ol av 8	40.4759	0.0339	0.0177375	0.04515	10.1715	0.121313	0.357588	48.647	0.04405	0.0207625	99.9349	0.895019			147-13Op av8	57.6384	0.162625	0.557125	0.293375	6.15362	0.130125	0.112	33.5836	0.977	0.255375	0
164-13	Hz altered	Coarse	85.59	13.17	0.75	0.48		normal	-	3.48179	820.196	3.48179	820.196	-	-	-	-	3.77062	4.08382	798.412	794.721	851.624	164-13Ol av 8	41.3712	0.00243333	0	0.00406667	7.61245	0.09175	0.378033	50.8991	0.0042	0.00123333	100.365	0.922594			164-13Op av8	58.0481	0.0108571	0.734125	0.292	4.80987	0.113625	0.0775	35.1467	0.304375	0.043875	0
165-13	Hz altered	Coarse	83.5	14.64	0	1.85		normal	-	6.90462	1305.51	6.90462	1305.51	-	-	-	-	6.30248	6.80977	1367.41	1275.62	1330.38	165-13Ol av 8	40.9416	0.004325	0.0133375	0.0451125	8.14557	0.10535	0.43495	49.9937	0.0526	0.0026125	99.7392	0.916254			165-13Op av8	58.1089	0.00714286	0.424875	0.265375	4.96113	0.119	0.139375	34.6235	1.03287	0.032	0
170-13	Hz	Transitional	62.31	31.82	0	5.87		normal	-	7.13634	1365.75	7.13634	1365.75	-	-	-	-	6.82925	7.48067	1384.94	1349.01	1346.39	170-13Ol av8	40.8859	0.0036	0.0131625	0.0447625	8.1658	0.104563	0.383525	49.9555	0.0523125	0.0017	99.6111	0.916003			170-13Op av8	57.7839	0.0105714	0.437143	0.261	4.98771	0.115	0.124429	34.447	1.05157	0.0332857	0
186-13	Hz	Incipient	70.97	21.41	1.8	5.81		normal	-	6.51483	1283.52	6.51483	1283.52	-	-	-	-	6.1638	6.77929	1342.41	1265.99	1297.33	186-13Ol av 8	40.411	0.0058125	0.0181875	0.032975	8.71001	0.108225	0.325525	49.5209	0.04825	0.005	99.1859	0.910193			186-13Op av6	58.4627	0.0218333	0.462333	0.214167	5.3285	0.122333	0.134333	34.75	0.979667	0.0648333	0
194-13	Lh	Coarse	51.57	39.64	5.73	3.07		normal	-	3.38453	791.866	3.38453	791.866	-	-	-	-	2.24695	2.48956	792.348	766.742	793.869	194-13 Ol av 8	40.8662	0.00305	0.0052875	0.0027625	7.47513	0.07565	0.427563	50.8738	0.0033625	0.000225	99.7339	0.923849			194-13Op av7	58.5636	0.002	0.686714	0.284857	4.72314	0.102286	0.088	35.72	0.243714	0.0211429	0
199-13	Hz	Transitional	80.47	12.11	4.2	3.23		Na-rich	-	6.39153	1316.2	5.52812	1284.25	7.25494	1348.15	6.39153	1316.2	10.3474	12.6266	1244.13	1279.76	1236.42	199-13Ol av8	40.592	0.0215	0.017925	0.043875	8.69616	0.10375	0.313575	49.8219	0.0424625	0.018975	99.6722	0.910817			199-13Op av8	58.5267	0.1025	0.621875	0.3165	5.24688	0.118375	0.124	34.1819	0.924375	0.2945	0
200-13	Hz	Transitional	77.66	15.44	2.8	4.1		Na-rich	-	6.34745	1366.65	6.30674	1365.09	6.38816	1368.2	6.34745	1366.65	7.05165	7.85781	1357.44	1362.46	1344.88	200-13Ol av 8	40.4151	0.008325	0.0202375	0.057	8.93081	0.110662	0.384138	49.5452	0.06035	0.0120375	99.5439	0.908167			200-13Op av7	58.246	0.0335714	0.577571	0.305857	5.41471	0.123571	0.127714	34.4544	1.209	0.143857	0
208-13	Hz	Coarse	88.2	10.27	0.3	1.23		normal	-	3.61335	821.722	3.61335	821.722	-	-	-	-	3.95492	4.32099	854.625	805.004	872.995	208-13Ol av 8	40.8032	0.0032625	0.0003625	0.00995	7.82605	0.0924875	0.414212	50.5101	0.00535	-2.5e-05	99.666	0.920031			208-13Op av8	58.4801	0.00628571	0.700625	0.3185	4.87638	0.115875	0.085625	35.2475	0.32575	0.04475	0
210-13	Dunite	Coarse	90.93	6.4	0.55	2.11		normal	-	3.50592	785.978	3.50592	785.978	-	-	-	-	3.52252	3.87094	804.758	754.803	809.741	210-13Ol av8	40.5907	0.002825	0.000775	0.0039125	7.81602	0.0808375	0.425413	50.3463	0.0044875	0.0005125	99.2728	0.919887			210-13Op av6	58.2818	0.005	0.602667	0.244667	4.94567	0.102667	0.0891667	35.3385	0.252667	0.0306667	0
216-13	Dunite	Coarse	92.99	4.82	tr.	2.2		normal	-	4.83865	890.5	4.83865	890.5	-	-	-	-	4.6909	5.13901	946.805	863.088	905.47	216-13Ol av 8	40.6717	0.0084125	0.0024	0.0131	7.6914	0.0912	0.383325	50.6985	0.007025	0.0013375	99.5688	0.921569			216-13Op av8	58.6213	0.081	0.41925	0.281125	4.7515	0.112	0.0875	35.5305	0.285625	0.087625	0
219-13	Lh	Transitional	70.52	16.85	6.72	5.91		Na-rich	-	6.70664	1329.28	5.65001	1290.15	7.76328	1368.42	6.70664	1329.28	8.35734	9.86626	1250.86	1284.49	1243.51	219-13Ol av 8	40.6484	0.0324	0.0185125	0.0418875	8.86737	0.103712	0.370437	49.7413	0.0424125	0.0202875	99.8867	0.909086			219-13Op av8	58.13	0.1555	0.623	0.291375	5.40975	0.119125	0.119375	34.3916	0.9275	0.318125	0
221-13	Hz	Sheared	74.74	20.55	3.24	1.47		Na-rich	-	6.58487	1310.06	6.50225	1307.03	6.66748	1313.09	6.58487	1310.06	7.61655	8.73081	1302.99	1293.58	1292.16	221-13Ol av 8	40.7153	0.028025	0.016625	0.0413125	8.98532	0.106475	0.383387	49.6887	0.0443125	0.0125875	100.022	0.9079			221-13Op av8	58.1781	0.131	0.511	0.255125	5.39375	0.11775	0.128	34.6521	0.96125	0.164625	0
228-13	Hz	Transitional	79.89	15.81	0	4.31		normal	-	6.31664	1294.27	6.31664	1294.27	-	-	-	-	7.77434	8.96293	1240.27	1281.7	1259.53	228-13Ol av 8	40.5992	0.019025	0.0114875	0.066525	8.43811	0.105	0.37605	49.9472	0.0384875	0.0144875	99.6156	0.913432			228-13Op av8	58.4409	0.08625	0.43325	0.422875	5.07875	0.121125	0.125	34.7908	0.87975	0.204	0
245-13	Hz	Sheared	80.44	17.49	0.4	1.67		Na-rich	-	6.00467	1267.59	5.93409	1265.03	6.07526	1270.14	6.00467	1267.59	6.12092	6.55613	1227.3	1253.61	1264.23	245-13Ol av 8	40.6319	0.0067125	0.0128625	0.0587625	8.60024	0.11075	0.379663	49.82	0.0445875	0.011275	99.6768	0.911709			245-13Op av8	58.1842	0.02175	0.4725	0.3655	5.14725	0.129625	0.126125	34.6955	0.95275	0.167125	0.0101429
300-13	Hz	Coarse	80.79	17.8	0.11	1.3		Na-rich	-	6.04108	1204.18	5.64745	1190.53	6.4347	1217.83	6.04108	1204.18	6.7689	7.42667	1129.78	1174.52	1139.56	300-13Ol av 8	41.1476	0.029675	0.0091625	0.0471875	8.57789	0.108688	0.39245	50.4967	0.0299625	0.0163	100.856	0.912996			300-13Op av7	58.3668	0.048	0.391333	0.382833	5.14717	0.123667	0.115833	35.1513	0.628667	0.2195	0.0146667
306-13	Hz	Coarse	84.66	11.65	0.17	3.52	tr.	normal	-	5.07987	973.534	5.07987	973.534	-	-	-	-	5.28037	5.69755	984.453	949.184	932.463	306-13Ol av 8	41.2775	0.0051	0.0026375	0.027475	7.59997	0.09785	0.372075	51.3748	0.010925	0.00385	100.773	0.923371			306-13Op av8	58.5269	0.00471429	0.349375	0.319125	4.6505	0.1155	0.0965	36.041	0.305125	0.11975	0.0086
342-13	Hz	Coarse	68.72	25.56	2.61	3.12		normal	-	3.29845	808.069	3.29845	808.069	-	-	-	-	3.68862	4.04151	790.818	778.54	874.892	342-13Ol av 8	41.2555	0.00295	-0.0004	0.003625	7.36982	0.0862125	0.444337	51.6469	0.00425	0	100.816	0.925882			342-13Op av8	57.99	0.00275	0.82025	0.3435	4.68088	0.107375	0.08925	35.92	0.352625	0.029375	0.00828571
344-13	Hz gar-rich	Coarse	69.69	22.4	2.13	5.79		normal	-	2.80267	766.643	2.80267	766.643	-	-	-	-	3.13338	3.51388	783.717	739.006	846.919	344-13Ol av 8	41.4802	0.0028875	0.0022875	0.002225	7.72385	0.089925	0.444638	51.244	0.0043	0.0008375	100.996	0.922037			344-13Op av8	57.9432	0.00616667	0.959375	0.368375	4.9685	0.111	0.083875	35.6995	0.350875	0.043375	0.00633333
501-13	Lh cp,gar-rich, phl	Coarse	67.58	11.86	11.59	8.97		Na-rich	-	4.50392	884.6	4.34045	879.991	4.6674	889.209	4.50392	884.6	4.87861	6.15504	907.152	859.558	870.772	501-13Ol av 8	40.86	0.0127625	0.0027	0.0035375	9.39191	0.08235	0.390912	49.8981	0.0078	0.001975	100.652	0.904494			501-13Op av8	58.181	0.088625	0.400875	0.0755	5.72837	0.0975	0.087375	35.4811	0.273625	0.086875	0.0058
520-13	Hz	Sheared	82	14.44	1.27	2.29		Na-rich	-	6.66558	1333.47	5.96551	1307.45	7.36565	1359.49	6.66558	1333.47	8.22997	9.63222	1267.79	1300.12	1280.21	520-13Ol av 8	40.8715	0.0340625	0.0198875	0.0446625	10.2109	0.120375	0.336625	49.2161	0.0516125	0.0162375	100.922	0.895745			520-13Op av7	57.8364	0.142	0.570143	0.267143	6.15129	0.130714	0.108286	34.0749	1.003	0.252	0.006
531-13	Hz	Transitional	72.5	23.01	0	4.49		normal	-	7.04865	1340.86	7.04865	1340.86	-	-	-	-	6.77639	7.35432	1326.62	1324.29	1320.32	531-13Ol av 8	41.1584	0.004725	0.0115375	0.05205	8.45036	0.115613	0.401462	50.3426	0.0491125	0.00225	100.589	0.913938			531-13Op av8	58.2125	0.007625	0.402125	0.2965	5.057	0.1215	0.129875	35.1344	0.976625	0.05275	0.00828571
536-13	Hz	Coarse	41.07	51.08	4.59	3.26	tr.	normal	-	6.04937	1049.05	6.04937	1049.05	-	-	-	-	5.40613	5.96132	1103.91	1006.75	1018.43	536-13Ol av 8	41.6088	0.0047125	0.0007625	0.014925	7.26111	0.087275	0.44135	51.2622	0.0095125	0.0018875	100.694	0.926388			536-13Op av8	58.4066	0.0025	0.3105	0.224625	4.42587	0.100875	0.10825	35.9856	0.357	0.040875	0.006
552-13	Hz, altered	Coarse	83.14	13.44	0.7	2.72		normal	-	3.27619	819.62	3.27619	819.62	-	-	-	-	3.64191	3.9072	792.54	800.142	876.033	552-13Ol av 8	41.419	0.0039125	0.0012875	0.004775	7.54151	0.09545	0.40305	51.1457	0.0041125	0.0013375	100.621	0.923601			552-13Op av7	58.0851	0.0171429	0.814571	0.348143	4.77371	0.111714	0.0815714	35.7114	0.356143	0.0821429	0.00575
582-13	Hz	Coarse orientation	69.21	24.84	1.5	4.45		Na-rich	-	6.53058	1299.53	4.89478	1239.83	8.16638	1359.23	6.53058	1299.53	6.26368	6.91065	1182.77	1234	1191.63	582-13Ol av 8	41.2304	0.011475	0.0167125	0.0658625	8.33057	0.113975	0.366613	50.3114	0.0389	0.021175	100.507	0.915007			582-13Op av8	57.9455	0.0615	0.66125	0.457625	4.9735	0.11925	0.116875	34.4491	0.873625	0.449125	0.00571429
594-13	Hz	Transitional						Na-rich	-	6.70584	1294.92	5.57595	1253.97	7.83572	1335.87	6.70584	1294.92	-	-	1208.25	1242.88	1244.06	594-13Ol av 4	40.0807	0.03695	0.0119	0.017175	11.9341	0.130475	0.287325	46.8905	0.058025	0.0171	99.4643	0.875062			594-13Op av8	57.3966	0.1785	0.59525	0.11325	7.41387	0.135125	0.089125	32.9281	0.92925	0.252375	0.004875
U57	Hz	Sheared	85.2	8.5	4	2.3		normal	-	5.90372	1269.23	5.90372	1269.23	-	-	-	-	5.94407	6.32146	1225.07	1260.23	1259.23	U57 av.11	41.1423	0.0325182	0.0121	0.0795909	8.59201	0.104409	0.344209	49.6567	0.0617818	0.0210636	100.052	0.911522			U57	57.8606	0.20465	0.6105	0.4913	5.2435	0.1057	0.1103	34.3909	0.9384	0.25885	0
U260	Hz	Coarse	90	4.5	4.5	1		normal	-	3.97368	889.066	3.97368	889.066	-	-	-	-	3.9972	4.2694	908.724	822.948	880.597	U260 av. 5	41.5169	0	0	0	8.0222	0.1133	0.3917	49.5377	0	0	99.5321	0.916719			U260	58.0334	0	0.7189	0.25145	4.96965	0.1102	0.07355	35.6446	0.3098	0	0
U503	Hz	Sheared	75.2	14	3.7	7.1		normal	-	6.43895	1306.17	6.43895	1306.17	-	-	-	-	6.07465	6.40405	1277.66	1290.88	1291	U503 av. 11	41.4861	0.0242929	0.0194929	0.0795714	8.62463	0.103186	0.318543	50.0095	0.0494429	0.0175429	100.743	0.911787			U503	58.3649	0.15635	0.5591	0.5002	5.1352	0.11985	0.1013	34.6793	0.9709	0.20775	0
U532	Hz	Sheared	86.4	5.7	4.9	3		Na-rich	-	5.86274	1285.33	5.69599	1279.21	6.0295	1291.46	5.86274	1285.33	5.92491	6.29699	1222.45	1272.16	1252.6	U532 av. 3	41.0619	0	0	0	8.6488	0.0973	0.3121	48.8963	0	0	99.3202	0.90973			U532	57.6071	0.1895	0.62525	0.4291	5.2283	0.1558	0.112	33.8563	0.9419	0.2736	0
U1188	Hz	Coarse	69.9	23.1	2	5		normal	-	6.73357	1328.54	6.73357	1328.54	-	-	-	-	5.99623	6.3846	1364.49	1320.14	1337.71	U1188av. 8	41.2161	0.014	0.014625	0.0675	8.27252	0.10965	0.372625	50.4121	0.06995	0.0064375	100.555	0.915704			U1188	57.8409	0.0161167	0.493817	0.270333	4.88635	0.108817	0.100617	35.1445	1.09397	0.0317333	0
Uv03/02	Lh	Sheared	59	12	14	15		Na-rich	-	6.17982	1228.25	5.3342	1198.54	7.02543	1257.95	6.17982	1228.25	6.65403	7.93684	1247.24	1184.38	1234.11	Uv03/02	40.8	0	0	0.02	9.7	0.1	0.32	48.9	0.04	0	99.88	0.899864			Uv03/02	57.6	0.12	0.62	0.12	6.21	0.11	0	34.1	0.94	0.22	0.04
Uv38/02	Lh	Sheared	77	11	6	6		Na-rich	-	6.33547	1269.81	6.16714	1263.76	6.5038	1275.86	6.33547	1269.81	-	-	1292.01	1252.51	1229.97	Uv38/02	40.42	0	0	0.02	8.48	0.09	0.38	50.07	0.04	0	99.5	0.913234			Uv38/02	57.6	0.084	0.481	0.191	5.09	0.137	0	35.22	0.801	0.131	0.014
Uv/153/02	Lh	Sheared	78	10	6	6		Na-rich	-	6.17728	1286.83	5.5317	1263.27	6.82286	1310.4	6.17728	1286.83	10.4539	12.7879	1307.72	1254.68	1244.87	Uv/153/02	40.56	0	0	0.04	10.18	0.133	0.323	48.73	0.051	0	100.017	0.8951			Uv/153/02	56.67	0.213	0.621	0.245	6.26	0.13	0	34.26	0.938	0.27	0.003
Uv205/02	Hz	Sheared	80	11	3	6		normal	-	6.29674	1296.82	6.29674	1296.82	-	-	-	-	7.39686	8.45684	1306.74	1286.99	1280.53	Uv205/02	40.64	0	0	0.03	8.61	0.1	0.38	49.79	0.05	0	99.6	0.91157			Uv205/02	58.08	0.002	0.482	0.272	5.05	0.099	0	34.79	0.949	0.09	0.01
Uv213/02	Hz	Sheared	75	18	2	5		Na-rich	-	6.06216	1298.62	5.94308	1294.23	6.18125	1303.01	6.06216	1298.62	7.0274	7.8394	1226.89	1287.56	1264.16	Uv213/02	41.37	0	0	0.044	8.38	0.133	0.36	49.7	0.056	0	100.043	0.913585			Uv213/02	57.3	0.09	0.53	0.34	5.03	0.1	0	34.5	0.94	0.19	0.12
Uv252/02	Lh	Sheared	67	18	6	9		Na-rich	-	6.4257	1303.3	6.16336	1293.68	6.68803	1312.92	6.4257	1303.3	6.86623	7.89993	1303.97	1282.49	1278.24	Uv252/02	41.05	0	0	0.031	8.97	0.125	0.342	49.74	0.047	0	100.305	0.908128			Uv252/02	56.91	0.171	0.591	0.245	5.34	0.123	0	34.68	0.953	0.201	0.002
Uv257/02	Lh	Sheared	75	5	11	9		Na-rich	-	6.4143	1300.93	5.7387	1276.18	7.08989	1325.68	6.4143	1300.93	8.26645	9.8643	1312.45	1268.28	1230.84	Uv257/02	40.02	0	0	0.02	9.37	0.08	0.35	49.09	0.06	0	98.99	0.903279			Uv257/02	57.13	0.061	0.603	0.196	5.55	0.121	0	34.64	0.861	0.204	0.024
Uv268/02	Lh	Sheared	63	14	11	12		Na-rich	-	6.37176	1291.62	5.66995	1266.04	7.07357	1317.2	6.37176	1291.62	7.48997	8.96487	1298.54	1258.51	1238.6	Uv268/02	41.3	0	0	0.02	9.14	0.12	0.38	49.2	0.05	0	100.21	0.905621			Uv268/02	57.4	0.15	0.67	0.16	5.35	0.14	0	34.6	0.9	0.23	0
Uv285/02	Hz	Sheared	80	10	4	6		Na-rich	-	5.95555	1231.37	5.52088	1215.99	6.39022	1246.75	5.95555	1231.37	-	-	1285.31	1202.98	1190	Uv285/02	40.53	0	0	0.02	9.7	0.12	0.326	49.03	0.04	0	99.766	0.900103			Uv285/02	56.45	0.176	0.531	0.2	5.88	0.108	0	35.02	0.766	0.205	0.13
Uv1/04	Lh	Sheared	66	15	7	12		Na-rich	-	6.04346	1205.76	5.79995	1197.3	6.28698	1214.21	6.04346	1205.76	7.21274	8.28347	1245.68	1177.52	1204.39	Uv1/04	41.05	0	0	0.024	8.16	0.119	0.318	50.54	0.021	0	100.232	0.916948			Uv1/04	57.44	0.125	0.514	0.226	5.24	0.126	0	35.51	0.778	0.172	0.003
Uv18/04	Hz	Sheared	85	7	3	5		Na-rich	-	6.22642	1290.81	5.63765	1269.29	6.81518	1312.34	6.22642	1290.81	-	-	1269.36	1258.65	1236.04	Uv18/04	40.93	0	0	0.03	8.86	0.09	0.37	49.24	0.04	0	99.56	0.908314			Uv18/04	56.42	0.167	0.588	0.265	5.35	0.156	0	35.27	0.892	0.252	0.078
Uv24/05	Lh	Sheared	79	6	8	7		Na-rich	-	6.31968	1313.23	6.16126	1307.37	6.4781	1319.09	6.31968	1313.23	9.27642	10.9631	1276.61	1294.77	1293.5	Uv24/05	40.12	0	0	0.04	10.2	0.12	0.34	48.71	0.05	0	99.58	0.894877			Uv24/05	57.8	0.135	0.553	0.36	5.98	0.145	0	34.31	1.02	0.22	0.001
Uv33/04	Hz	Sheared	77	13	4	6		Na-rich	-	6.20772	1288.18	5.59519	1265.81	6.82025	1310.54	6.20772	1288.18	-	-	1231.37	1258.46	1237.6	Uv33/04	39.8	0	0	0.01	11.95	0.1	0.32	47.11	0.05	0	99.34	0.875427			Uv33/04	56.38	0.163	0.575	0.187	6.98	0.125	0	33.68	0.897	0.22	0
Uv-405/09	Hz	Sheared	84.1	8.8	3.9	3.2		normal	-	6.19025	1240.52	6.19025	1240.52	-	-	-	-	6.21931	6.83308	1238.24	1227.72	1229.44	Uv-405/09	40.9063	0	0.01582	0.04282	8.17572	0.1104	0.38232	50.0652	0.04296	0	99.7415	0.916079			Uv-405/09	57.5761	0	0.56842	0.31236	4.92068	0.12644	0.1195	35.2015	0.7957	0	0
Uv-407/09	Lh	Sheared	66.6	10.8	11.9	10.8		normal	-	5.96084	1241.37	5.96084	1241.37	-	-	-	-	6.25127	7.17664	1248.11	1232.67	1239.57	Uv-407/09	40.7305	0	0.00986	0.02672	9.00872	0.106	0.39304	49.2931	0.04592	0	99.6139	0.907009			Uv-407/09	57.5327	0	0.670567	0.174883	5.4136	0.116633	0.117267	34.8369	0.859817	0	0
Uv-408/09	Hz	Transitional	67.4	22	4.2	6.4		normal	-	6.35183	1300.66	6.35183	1300.66	-	-	-	-	6.12385	6.65665	1283.79	1291.88	1297.72	Uv-408/09	40.9241	0	0	0	8.96473	0.114533	0.402616	49.3691	0	0	99.8029	0.907551			Uv-408/09	57.4338	0.14315	0.592083	0.26175	5.38523	0.11375	0.0924667	34.6566	0.9989	0.141167	0
Uv-412/09	Lh	Sheared	69.7	7.4	14.3	8.6		normal	-	5.86966	1272.69	5.86966	1272.69	-	-	-	-	7.82211	9.50827	1338.88	1266.44	1273.77	Uv-412/09															Uv-412/09	56.9974	0	0.67922	0.10676	7.25738	0.13826	0.0877	33.2139	0.98108	0	0
Uv-419/09	Hz	Coarse	69.4	21.5	4.5	4.6		normal	-	5.16445	964.188	5.16445	964.188	-	-	-	-	4.49086	4.73959	991.923	946.019	943.368	Uv-419/09	41.284	0	0	0	7.65648	0.0856	0.433709	50.58	0	0	100.019	0.921728			Uv-419/09	57.8467	0.0106375	0.378125	0.227687	4.58429	0.107825	0.0879125	36.1544	0.3115	0.0496375	0
Uv-421/09	Hz	Transitional	70.9	20.8	3.5	4.8		Na-rich	-	5.931	1289.13	5.63234	1278.15	6.22967	1300.11	5.931	1289.13	5.56093	5.86724	1240.5	1275.4	1253.14	Uv-421/09	40.919	0	0	0	8.95172	0.14585	0.413472	49.2742	0	0	99.7305	0.907511			Uv-421/09	57.275	0.13535	0.662233	0.444067	5.30248	0.156583	0.0952	34.3904	0.95535	0.282433	0
Uv-424/09	Lh	Tansitional	62.2	9.7	13.1	14.9		normal	-	5.9901	1266.93	5.9901	1266.93	-	-	-	-	6.59145	7.72372	1299.13	1260.41	1272.13	Uv-424/09	40.5446	0	0.014525	0.020075	9.24742	0.1099	0.38365	49.2119	0.0472	0	99.5791	0.904638			Uv-424/09	57.6437	0	0.71182	0.15272	5.58422	0.12276	0.12204	34.4354	0.96544	0	0
Uv-539/09	Lh	Transitional	68.6	7.1	12.6	11.7		normal	-	5.96879	1252.53	5.96879	1252.53	-	-	-	-	7.04661	8.36423	1320.36	1241.02	1257.61	Uv-539/09	40.3004	0	0.0166	0.0313	11.1445	0.12495	0.3701	47.6291	0.0552	0	99.6722	0.883969			Uv-539/09	56.9965	0	0.6628	0.14378	6.6989	0.13416	0.11326	33.6831	0.90944	0	0
Uv-573/09	Lh	Transitional	69.6	17.4	5.6	7.4		Na-rich	-	6.0571	1292.31	6.05524	1292.24	6.05895	1292.38	6.0571	1292.31	6.01673	6.7194	1280.1	1289.13	1282.12	Uv-573/09	40.8977	0	0	0	8.65023	0.1176	0.407729	49.4846	0	0	99.5756	0.910694			Uv-573/09	57.7839	0.0463714	0.592857	0.220886	5.25454	0.135671	0.09045	34.9063	0.995229	0.108357	0
Uv591-09	Hz	Coarse	89.8023	5.03358	4.44758	0.716565	-	normal	-	4.02023	957.915	4.02023	957.915	-	-	-	-	4.26716	4.54881	921.389	942.858	944.245	Uv591-09Ol av6	40.4786	0.00231667	-0.00095	0.0114833	7.99732	0.0953833	0.406467	50.3325	0.00698333	0.00188333	99.335	0.91816			Uv591-09	57.4745	0.003025	0.783325	0.309563	4.78396	0.120825	0.0883375	35.7418	0.3987	0.050375	-0.0018625
Uv-594/09	Hz	Sheared	79.4	15.2	2.3	3.1		normal	-	6.92145	1315.23	6.92145	1315.23	-	-	-	-	6.21098	6.63394	1303.09	1297.07	1322.45	Uv-594/09															Uv-594/09	57.8044	0	0.59344	0.4342	5.26314	0.1342	0.12512	34.6718	1.0004	0	0
Uv-533/10	Hz	Sheared	82.4	12	2.5	3.1		normal	-	6.56204	1334.46	6.56204	1334.46	-	-	-	-	6.35397	6.92974	1280.6	1326.54	1324.8	Uv-533/10	40.8419	0	0.0216	0.0657333	8.70553	0.1126	0.401017	49.7169	0.0543	0	99.9197	0.910557			Uv-533/10	57.9021	0	0.6794	0.3797	5.23776	0.12172	0.12698	34.5828	1.07194	0	0
Uv-546/10	Hz	Sheared	74.1	18.7	3	4.1		normal	-	6.49153	1238.72	6.49153	1238.72	-	-	-	-	6.52622	7.17819	1248.38	1222.43	1230.24	Uv-546/10															Uv-546/10	58.3328	0	0.539933	0.349717	4.74563	0.119017	0.120117	35.4818	0.764483	0	0
Uv-550/10	Lh	Transitional	71.6	18.2	4.9	5.3		normal	-	6.32008	1243.66	6.32008	1243.66	-	-	-	-	6.0808	6.72116	1219.97	1229.97	1229.64	Uv-550/10	40.7199	0	0.0124	0.03574	8.566	0.10796	0.40126	49.5542	0.04292	0	99.4404	0.9116			Uv-550/10	58.1884	0	0.55904	0.22768	5.11678	0.12354	0.12506	35.2141	0.78404	0	0
Uv565-10	Hz	Coarse	83	13	0.7	3.8		normal	-	4.1946	985.931	4.1946	985.931	-	-	-	-	4.33948	4.65847	922.002	979.111	927.73	Uv565-10Ol av6	40.4922	0.00015	-0.000916667	0.0091	8.24608	0.0927	0.40955	50.0203	0.00761667	0.0015	99.2814	0.915348			Uv565-10	57.472	0.0098625	0.789463	0.287863	4.96091	0.116975	0.086075	35.6702	0.358575	0.0264125	-0.0004875
Uv-78/11	Hz	Transitional	65.7	27.3	1.6	5.4		normal	-	6.626	1315.94	6.626	1315.94	-	-	-	-	6.27158	6.78445	1292.87	1303.09	1312.09	Uv-78/11	40.7101	0	0.01965	0.06535	8.62473	0.1154	0.3806	49.4845	0.05035	0	99.4506	0.910934			Uv-78/11	57.84	0	0.6545	0.43734	5.12828	0.11938	0.11856	34.5787	1.00982	0	0
Uv-110/11	Hz	Incipient	74	17.1	3.6	5.3		normal	-	6.66341	1306.43	6.66341	1306.43	-	-	-	-	6.36344	7.01108	1290.36	1292.13	1310.34	Uv-110/11	40.8215	0	0.0170333	0.0385333	8.42267	0.10705	0.385383	49.8667	0.0556333	0	99.7145	0.913449			Uv-110/11	58.0326	0	0.54544	0.23512	5.06566	0.12254	0.1175	35.2249	1.00186	0	0
Uv86-13	Dun	Coarse	93.6525	1.56603	2.5468	2.23463	-	normal	-	3.85305	945.539	3.85305	945.539	-	-	-	-	4.20302	4.45995	886.06	927.102	903.468	Uv86-13Ol av6	40.5513	-0.000916667	-0.000783333	0.0125667	7.8464	0.091	0.373867	50.253	0.0055	0.00306667	99.1385	0.919463			Uv86-13	57.4179	0.0193375	0.8775	0.347	4.70946	0.123525	0.0745875	35.6583	0.348838	0.063125	0.0003375
Uv-KC-03/08	Hz	Transitional	83.2	9.4	4.1	3.3		normal	-	6.30418	1304.22	6.30418	1304.22	-	-	-	-	6.16077	6.75099	1272.2	1296.42	1292.77	Uv-KC-03/08	41.2466	0	0	0	8.68791	0.108425	0.365121	49.4958	0	0	99.9167	0.910358			Uv-KC-03/08	57.3137	0.140383	0.5935	0.290917	5.20537	0.127983	0.108067	34.7776	0.987667	0.158217	0
Uv-KC-67/08	Hz	Transitional	68.7	23.3	3.9	4.1		normal	-	6.26475	1302.43	6.26475	1302.43	-	-	-	-	5.94783	6.34646	1286.1	1297.38	1289.09	Uv-KC-67/08	41.1205	0	0	0	8.49357	0.120514	0.382657	49.6853	0	0	99.8236	0.912493			Uv-KC-67/08	57.5175	0.03415	0.53315	0.31975	5.1048	0.109817	0.101917	35.0243	0.98285	0.0998667	0
Ol, olivine; Opx, orthopyroxene; Cpx, clinopyroxene; Gar, garnet; Spl, spinel; Ilm, ilmenite; Pys, pyroxenes Hzb, harzburgite; Lh, lherzolite; P, pressure (GPa); T, temperature (°C). Modal compositions were calculated from area percentage in polished thin sections.
PNG85: Al-in-Opx (Opx-Gar) barometer of Nickel and Green (1985); PNT00: Cr-in-Cpx barometer of Nimis and Taylor (2000); PSY21: Cr-in-Cpx barometer (NT00) modified by Sudholz et al. (2021); PCA91: Al-in-Opx (NG85) barometer modified by Carswell (1991); TTA98: Cpx-Opx thermometer of Taylor (1998); TNG10: Opx-Gar (Fe-Mg exchange) thermometer of Nimis and Grutter (2010). TNT00: En-in-Cpx thermometer …
Na-rich Opx are those with (Na>Cr+Ti)mol. Pcorrected for Na-rich=(PNG85+PCA91)/2; Tcorrected for Na-rich=(TTA98 calculated at PNG85+TTA98 calculated at PCA91)/2.
The NG85-TA98 estimates in bold are for samples with low-Na opx that are considered robust and duplicated in the "Robust" P and T columns. Other entries in the "Robust" columns are corrected NG85-TA98 estimates for samples with Na-rich opx.
[truncated: 34 more columns]

## Sheet: Table S2 This study - Lit data
Relatively oxidized conditions for diamond formation at Udachnaya (Siberia)
Luca Faccincani 1, Valerio Cerantola 2,3, Fabrizio Nestola 4, Paolo Nimis 4, Luca Ziberna 5,6, Leonardo Pasqualetto 4, Aleksandr I. Chumakov 3, Jeffrey W. Harris 7, Massimo Coltorti 1
1 Department of Physics and Earth Sciences, University of Ferrara, Via Saragat 1, 44121 Ferrara, Italy
2 Department of Earth and Environmental Sciences, Università degli Studi di Milano-Bicocca, Piazza della Scienza 4, 20126 Milan, Italy
3 ESRF – The European Synchrotron, CS40220, 38043 Grenoble Cedex 9, France
4 Department of Geosciences, University of Padua, Via Gradenigo 6, 35131 Padua, Italy
5 Department of Mathematics and Geoscience, University of Trieste, Via Weiss 2, 34128 Trieste, Italy
6 Bayerisches Geoinstitut, University of Bayreuth, Universitätsstraße 30, 95440 Bayreuth, Germany
7 School of Geographical and Earth Sciences, University of Glasgow, G12 8QQ Glasgow, UK
Correspondence to: Luca Faccincani (luca.faccincani@unife.it)
Table S2. Major element compositions for Udachnaya minerals (wt.%) and Fe3+/∑Fe ratios of garnets from the literature (Goncharov et al. 2012; Yaxley et al. 2012). Following Liu et al. (2022), we recalculated the P-T estimates for 42 garnet-peridotite xenoliths for which Fe3+/∑Fe ratios of garnets are available. 25 out of 42 xenoliths yield robust P-T estimates, while P-T estimates for 17 xenolith…
			Modal composition							P(GPa)	T (°C)	P(GPa)	T (°C)	P(GPa)	T (°C)	Δlog fO2 [FMQ]	err Δlog fO2 [FMQ]	Olivine															Opx			Orthopyroxene
Sa.No.	Rock type	Texture	Ol	Opx	Cpx	Gar	Spl	Opx type	Disequilibr.	Robust	Robust	NG85	TA98	CA91-TTA98	TTA98-PCA91	Miller et al. 2016	Miller et al. 2016	Sa.No.	SiO2	TiO2	Al2O3	Cr2O3	FeOt	MnO	NiO	MgO	CaO	Na2O	Total	Mg#			Sa.No.	SiO2	TiO2	Al2O3	Cr2O3	FeOt	MnO	NiO	MgO	CaO	Na2O	K2O	Total	Mg#	Cr#	Na-inOpx
U4	Lh	Transitional	70.8	19.3	5.5	4.4	0	Na-rich	-	5.93121	1305.7	5.90217	1304.62	5.96024	1306.78	-1.69	1.14	U4 av. 6	41.2285	0	0	0	8.5013	0.1062	0.3528	49.4049	0	0	99.7888	0.912			U4	58.1451	0	0.5791	0.3405	5.041	0.1148	0.0937	34.2518	1.0604	0.1436	0	99.6947	0.9237	0.2829	0.0002
U10	Hz	Transitional	81.4	12.1	4	2.5	0	normal	-	6.1629	1292.9	6.1629	1292.9	-	-	-2.02	1	U10 av. 15	41.1839	0	0	0	8.6772	0.116	0.3519	49.6153	0	0	100.148	0.9107			U10	58.1406	0	0.4859	0.3374	5.0758	0.0955	0.0996	34.7829	0.9995	0.0992	0	100.35	0.9243	0.3178	-0.0012
U29	Lh	Coarse	68.6	20.2	5.6	2.1	0	normal	-	4.82997	911.334	4.82997	911.334	-	-	-2	0.94	U29 av. 7	41.5634	0	0	0	7.5904	0.102	0.368	50.5282	0	0	100.114	0.9223			U29	58.6275	0	0.3749	0.2217	4.3652	0.1041	0.0953	35.9508	0.3455	0.0467	0	100.282	0.9362	0.284	-0.0014
U50	Lh	Transitional	65.2	22	5.9	6.9	0	Na-rich	-	5.81783	1275.35	5.68962	1270.66	5.94603	1280.03	-1.56	1.21	U50 av. 18	41.0797	0.0263	0.019	0.0417	8.7466	0.0992	0.3636	49.6746	0.0477	0.017	100.117	0.9101			U50	58.2357	0	0.6201	0.2381	5.374	0.1211	0.1102	34.9222	1.022	0.1197	0	100.615	0.9205	0.2048	0.0007
U64	Hz	Coarse	77.1	16.6	3.8	2.5	0	Na-rich	-	5.67476	1196.24	5.6161	1194.2	5.73342	1198.28	-2.35	0.98	U64 av. 8	41.0551	0	0	0	8.8723	0.1102	0.3106	49.4971	0	0	99.9062	0.9086			U64	58.2874	0	0.4306	0.3792	5.1429	0.1336	0.1254	34.8421	0.654	0.1628	0	100.137	0.9235	0.3713	0.0003
U70	Lh	Sheared	79	9.5	6	5.5	0	Na-rich	-	5.71345	1254.19	5.13661	1233.35	6.29029	1275.03	-1.84	1.19	U70 av.14	41.3372	0	0	0	9.5207	0.0944	0.3777	48.8776	0	0	100.332	0.9015			U70	58.3316	0	0.6531	0.2696	5.67	0.1181	0	34.025	0.9248	0.216	0	100.184	0.9145	0.2169	0.0034
U71	Hz	Transitional	76.5	11.2	4.7	7.6	0	Na-rich	-	5.84007	1266.33	5.8379	1266.25	5.84223	1266.41	-1.8	1.12	U71 av. 4	41.3577	0	0	0	8.6212	0.0746	0.3327	49.8689	0	0	100.349	0.9116			U71	57.943	0	0.5587	0.2671	5.188	0.1191	0.1009	34.651	1.0338	0.1093	0	100.191	0.9225	0.2428	0
U85	Lh	Sheared	57	11.9	14.5	16.6	0	Na-rich	-	5.9976	1240.56	5.30577	1215.95	6.68942	1265.17	-2.49	1.52	U85 av. 7	41.1743	0	0	0	9.5415	0.1088	0.3324	48.8893	0	0	100.112	0.9013			U85	57.8239	0.1028	0.6859	0.1576	5.7772	0.109	0.1116	34.5085	0.8125	0.2217	0	100.238	0.9141	0.1336	0.0038
U148	Lh	Sheared	69.7	16.4	6.2	7.7	0	Na-rich	-	6.02667	1268.72	5.82649	1261.47	6.22685	1275.97	-2.35	1.4	U148 av. 5	40.9636	0	0	0	9.071	0.1081	0.3105	48.7793	0	0	99.6966	0.9055			U148	57.9053	0.1684	0.6536	0.2172	5.5347	0.1153	0.0973	34.5463	0.9254	0.1849	0	100.185	0.9175	0.1823	0.001
U183	Hz	Sheared	80.8	13.5	1.9	3.8	0	normal	-	6.39831	1223.68	6.39831	1223.68	-	-	-2.98	1.14	U183 av. 5	41.1718	0.0488	0.0139	0.0478	8.168	0.1249	0.3473	49.9974	0.0438	0.0133	99.9795	0.916			U183	57.9584	0.1799	0.5305	0.3439	4.7892	0.1048	0.0825	35.0409	0.7385	0.1468	0	100.133	0.9288	0.3031	-0.002
U283	Hz	Coarse	84.5	10.2	1.4	3.7	0.2	normal	-	2.93035	761.529	2.93035	761.529	-	-	0.23	0.92	U283 av. 9	41.3955	0	0	0	7.8167	0.0961	0.3601	50.2662	0	0	99.9059	0.9198			U283	58.3335	0	0.8699	0.3318	4.858	0.1224	0.0776	35.5879	0.313	0.0543	0	100.288	0.9289	0.2037	-0.0026
U501	Hz	Coarse	82.4	6.6	4.3	6.7	0	normal	-	4.88974	894.944	4.88974	894.944	-	-	-2.27	1.3	U501 av. 4	41.4597	0	0	0	8.1622	0.09	0.3384	50.268	0	0	100.331	0.9165			U501	58.5986	0.0978	0.4845	0.3025	4.9993	0.0985	0.0578	35.6252	0.2927	0.0639	0	100.619	0.927	0.2952	-0.0031
87/70	Hz	Sheared	no data					normal	-	5.41564	1228.58	5.41564	1228.58	5.41564	1228.58	-1.64	1.07	87/70 ol av	40.81				8.59	0.1	0.41	50.26			100.17	0.9125			87/70 opx av	57.46		0.67	0.33	5.21	0.11	0.19	35.09	0.95	0.08		100.09	0.9231	0.2484	-0.0018
Y-10	Lh	Sheared	71	16	6	7	0	normal	-	5.09165	1154.51	5.09165	1154.51	5.09165	1154.51	-1.92	1.14	Y-10 ol av	40.65				9.1	0.1	0.51	49.87			100.23	0.9071			Y-10 opx av	56.98	0.15	0.75	0.28	5.44		0.13	34.67	0.75	0.15		99.3	0.9191	0.2003	-0.0007
Y-16	Wh	Sheared	64	1	19	16.7	0	Na-rich	-	5.64802	1257.02	5.17514	1245.82	6.1209	1268.22	-1.89	1.6	Y-16 ol av	39.99				12.58		0.39	46.75			99.71	0.8688			Y-16 opx av	57.3	0.2	0.91	0.15	7.58	0.12	0.14	33.21	1.06	0.25		100.92	0.8865	0.0996	0.0036
Y-19	Wh	Sheared	80	1	16	3.7	0	Na-rich	-	4.83008	1186.35	4.58811	1180.81	5.07206	1191.88	-1.58	1.11	Y-19 ol av	40.74				8.95	0.1	0.46	49.65			99.9	0.9082			Y-19 opx av	57.08		0.85	0.3	5.39		0.14	34.35	0.95	0.19		99.25	0.9191	0.1914	0.0022
Uv-4-05	Lh	No data	Ol, Pxs and Gar present				0	normal	-	6.157	1275.79	6.157	1275.79	6.157	1275.79	-2.11	1.19	Uv-4-05 ol	40.496	0.0291	0.0253	0.0572	9.3877	0.1473	0.3966	50.0002	0.0587	0.0185	100.617	0.9047			Uv-4-05 opx	56.2716	0.1512	0.5889	0.341	5.5793	0.1599	0.1255	34.9455	0.9927	0.1668	0.003	99.3253	0.9178	0.2798	-0.001
Uv-9-05	Lh	No data	Ol, Pxs and Gar present				0	normal	-	2.92441	733.747	2.92441	733.747	2.92441	733.747	-0.8	1.35	Uv-9-05 ol	41.3668	-0.0073	0.0025	0.0045	7.8188	0.0999	0.4253	51.3716	0.0056	0.0046	101.092	0.9213			Uv-9-05 opx	57.5514	0.0047	0.7687	0.2732	4.8853	0.1293	0.0813	36.0929	0.3133	0.0584	0.0122	100.171	0.9294	0.1925	-0.0018
Uv-26-04	Lh	No data	Ol, Pxs and Gar present				0	normal	-	5.01243	934.871	5.01243	934.871	5.01243	934.871	-1.74	1.08	Uv-26-04 ol	40.0957	0.0052	0.0064	0.0224	7.5693	0.0993	0.4467	51.3342	0.0113	0.0027	99.5932	0.9236			Uv-26-04 opx	57.4113	0.0056	0.4048	0.2485	4.6111	0.1406	0.1066	36.7395	0.3387	0.0346	0.0019	100.043	0.9342	0.2916	-0.0022
Uv-50-04	Lh	No data	Ol, Pxs and Gar present				0	Na-rich	-	5.81101	1276.31	5.5701	1270.55	6.05193	1282.07	-3.75	1.7	Uv-50-04 ol	40.7033	0.0333	0.022	0.0431	10.2384	0.1429	0.4055	49.4194	0.0433	0.018	101.069	0.8959			Uv-50-04 opx	57.0846	0.1539	0.7416	0.2696	6.1104	0.1791	0.1275	34.5385	1.0048	0.217	0.0083	100.435	0.9097	0.1961	0.0015
Uv129-03	Lh	Coarse	Ol, Pxs and Gar present				0	Na-rich	-	5.45065	1152.09	5.23359	1147.28	5.66771	1156.89	-1.51	1.43	Uv129-03 ol	40.8345	0.044	0.0173	0.0358	9.3477	0.1266	0.3845	48.9462	0.0456	0.0186	99.8007	0.9032			Uv129-03 opx	57.3842	0.1643	0.6431	0.2072	5.7269	0.1423	0.1254	34.7757	0.9263	0.1873	0.0073	100.29	0.9154	0.1777	0.0013
Uv-87-03	Lh	No data	Ol, Pxs and Gar present				0	normal	-	6.08279	1315.38	6.08279	1315.38	6.08279	1315.38	-1.97	1.17	Uv-87-03 ol	40.9848	0.0036	0.0221	0.0599	9.0676	0.1484	0.4206	50.2803	0.0596	0.0135	101.061	0.9081			Uv-87-03 opx	56.2647	0.0185	0.5998	0.3081	5.4294	0.1417	0.1335	34.982	1.167	0.077	0.0013	99.123	0.9199	0.2563	-0.0018
Uv-88-03	Lh	No data	Ol, Pxs and Gar present				0	normal	-	6.86959	1356.6	6.86959	1356.6	6.86959	1356.6	-2.49	1.15	Uv-88-03 ol	40.0757	0.0028	0.0186	0.0478	8.713	0.1406	0.4328	50.6593	0.0547	0.0057	100.151	0.912			Uv-88-03 opx	56.5852	0.0165	0.514	0.2601	5.1714	0.1544	0.1496	35.5673	1.0934	0.0155	0.001	99.5284	0.9246	0.2534	-0.0031
Uv-68-03	Lh	Sheared	Ol, Pxs and Gar present				0	Na-rich	-	5.82489	1240.67	5.2264	1226.69	6.42338	1254.65	-2.16	1.35	Uv-68-03 ol	40.9443	0.0063	0.0211	0.0341	9.2122	0.1416	0.3911	49.7531	0.0445	0.0226	100.571	0.9059			Uv-68-03 opx	57.5488	0.0722	0.7084	0.2022	5.3826	0.1449	0.1113	34.2229	0.917	0.23	0.0049	99.5451	0.9189	0.1607	0.0039
Uv-34-03	Lh	No data	Ol, Pxs and Gar present				0	normal	-	6.05487	1274.3	6.05487	1274.3	6.05487	1274.3	-1.68	1.24	Uv-34-03 ol	40.956	0.034	0.0177	0.0611	9.4677	0.1611	0.3905	49.8312	0.0509	0.0201	100.99	0.9037			Uv-34-03 opx	56.6072	0.1671	0.6071	0.3364	5.7046	0.1496	0.1323	34.7783	0.9904	0.1874	0.0031	99.6636	0.9157	0.271	-0.0005
U9	Hz	Sheared	70.3	24.1	0	5.6	0	Na-rich	No data			5.19323	-	-	-	not recalculated		U9 av. 16	41.1527	0.0306	0.0206	0.0826	9.1844	0.1375	0.3343	49.3899	0.0432	0.0304	100.412	0.9055			U9	57.932	0.1215	0.6279	0.5652	5.5114	0.16	0.1194	34.3371	0.9148	0.299	0	100.337	0.9174	0.3765	0.0007
U267	Lh	Sheared	53.3	21.6	12.1	13	0	Na-rich	Gar-Pxs			5.88109	1257.26	-	-	not recalculated		U267 av. 6	41.0982	0	0	0	9.9402	0.1216	0.3236	48.751	0	0	100.509	0.8974			U267	57.9049	0.2174	0.6892	0.205	5.9711	0.1267	0.125	33.9148	0.9631	0.2258	0	100.349	0.9101	0.1664	0.0019
U506	Hz	Coarse	77.2	16	2.6	4.2	0	normal	Gar-Pxs			5.91337	987.977	-	-	not recalculated		U506 av. 10	41.6446	0	0	0	7.3377	0.0855	0.3682	50.9395	0	0	100.358	0.9252			U506	58.7688	0	0.3699	0.2738	4.4092	0.1084	0.0785	36.2165	0.3896	0	0	100.629	0.9361	0.3318	-0.0036
U507	Lh	Sheared	65.7	13.6	9	11.7	0	Na-rich	Gar-Pxs			5.96419	1283.99	-	-	not recalculated		U507 av. 7	40.4144	0	0	0	10.6752	0.1236	0.3295	47.9703	0	0.0274	99.7143	0.889			U507	57.9593	0.2313	0.7124	0.1436	6.2326	0.1198	0.1057	33.8797	0.9898	0.2125	0	100.573	0.9065	0.1191	0.0021
87/100	Hz	Coarse	67	21	2	7.8	1.8	normal	Cpx-Opx			4.65213	1139.78	4.65213	1139.78	not recalculated		87/100 ol av	40.67				7.98		0.44	50.43			99.52	0.9185			87/100 opx av	57.67		0.84	0.37	5.02		0.11	35.83	0.35	0.09		100.28	0.9271	0.2281	-0.002
87/59	Hz	Coarse	85	7	4	3.7	0.4	normal	Cpx-Opx			3.94252	515.185	3.94252	515.185	not recalculated		87/59 ol av	41.89				7.83	0.14	0.52	48.96			99.34	0.9177			87/59 opx av	59.71		0.23	0.24	5.04	0.13	0	34.76	0.37			100.48	0.9248	0.4118	-0.0032
Y-17	Lh	Coarse	77	12	6	5.4	0	normal	Cpx-Opx			2.82018	763.705	2.82018	763.705	not recalculated		Y-17 ol av	40.84				8.02		0.45	50.57			99.88	0.9183			Y-17 opx av	57.55		1.15	0.53	4.93		0.07	35.4	0.51			100.14	0.9275	0.2362	-0.007
87/114	Hz	Sheared	no data					Na-rich	Gar-Pxs			5.17792	1244.6	5.25276	1246.37	not recalculated		87/114 ol av	40.98				8.8	0.11	0.45	49.89			100.23	0.91			87/114 opx av	57.39	0.17	0.83	0.43	5.27		0.16	34.32	1	0.25		99.82	0.9207	0.2579	0.0003
87/97	Lh	Sheared	no data					Na-rich	Cpx-Opx			5.64528	1349.58	6.14561	1362.15	not recalculated		87/97 ol av	40.74				11.68	0.11	0.41	48.02			100.96	0.8799			87/97 opx av	56.92	0.17	0.86	0.22	6.81		0.13	33.25	0.99	0.21		99.56	0.8969	0.1465	0.0018
Y-1	Lh	Sheared	76	15	7	2	0	normal	Gar-Pxs			5.18839	1236.74	5.18839	1236.74	not recalculated		Y-1 ol av	40.65				8.75		0.45	49.61			99.46	0.91			Y-1 opx av	56.89	0.2	0.8	0.52	5.25		0.17	34.23	0.99	0.26		99.31	0.9208	0.3036	-0.001
Y-3	Lh	Sheared	65	16	12	6.9	0	Na-rich	Gar-Pxs			5.27	1231.92	5.81043	1244.58	not recalculated		Y-3 ol av	40.2				12.5	0.13	0.38	47.08			100.29	0.8703			Y-3 opx av	57.45	0.19	0.82	0.19	7.37	0.1	0.14	33.41	0.97	0.21		100.85	0.8899	0.1345	0.0019
Y-4	Lh	Sheared	63	10	21	6	0	Na-rich	Gar-Pxs			5.02439	1221.57	5.38815	1230.07	not recalculated		Y-4 ol av	40.76				9.57		0.43	49.48			100.24	0.9021			Y-4 opx av	57.08	0.12	0.81	0.32	5.67	0.1	0.1	34.44	1.02	0.22		99.88	0.9155	0.2095	0.0014
Uv-59-03	Lh	No data	Ol, Pxs and Gar present				0	normal	Cpx-Opx			5.84796	1229.52	5.84796	1229.52	not recalculated		Uv-59-03 ol	40.7687	0.0403	0.012	0.0346	9.0148	0.127	0.3852	49.8112	0.0375	0.0147	100.246	0.9078			Uv-59-03 opx	57.6304	0.0419	0.6405	0.3577	5.3419	0.1409	0.1509	34.6983	1.2204	0.1215	0.0268	100.371	0.9205	0.2725	-0.0013
Uv-45-03	Lh	No data	Ol, Pxs and Gar present				0	normal	Cpx-Opx			3.63318	884.006	3.63318	884.006	not recalculated		Uv-45-03 ol	41.0307	0.0035	0.0036	0.0082	8.2266	0.1124	0.4084	51.0808	0.0144	0.0041	100.893	0.9171			Uv-45-03 opx	56.6471	0.0066	0.7757	0.2484	5.0891	0.1445	0.0887	35.801	0.5596	0.0479	0.0736	99.4821	0.9261	0.1768	-0.0018
Uv130-03	Lh	No data	Ol, Pxs and Gar present				0	normal	Cpx-Opx			6.94233	1239.73	6.94233	1239.73	not recalculated		Uv130-03 ol	39.8737	0.0003	0.0019	0.0118	8.1323	0.1085	0.4268	51.1997	0.0134	0.0051	99.7735	0.9182			Uv130-03 opx	57.4839	0.0063	0.3517	0.2309	4.8196	0.135	0.1134	36.2884	0.3174	0.0453	0.0034	99.7951	0.9307	0.3058	-0.0017
Uv-89-03	Lh	No data	Ol, Pxs and Gar present				0	normal	Cpx-Opx			6.3553	1238.87	6.3553	1238.87	not recalculated		Uv-89-03 ol	40.4815	0.0408	0.0135	0.0467	9.5035	0.1147	0.3815	48.8464	0.0727	0.0059	99.5072	0.9016			Uv-89-03 opx	57.8156	0.0347	0.4409	0.2634	5.1288	0.1027	0.1078	35.9024	0.4309	0.0971	0.0073	100.332	0.9258	0.2861	-0.0008
Uv-42-03	Lh	No data	Ol, Pxs and Gar present				0	normal	Cpx-Opx			3.8386	938.779	3.8386	938.779	not recalculated		Uv-42-03 ol	41.1622	0.0034	0.0087	0.0055	7.941	0.117	0.4144	51.3182	0.0064	0.01	100.987	0.9201			Uv-42-03 opx	56.9463	0.0082	0.8367	0.2811	4.6449	0.1307	0.0711	35.5623	0.2656	0.0264	0.0046	98.7778	0.9317	0.1839	-0.003
Ol, olivine; Opx, orthopyroxene; Cpx, clinopyroxene; Gar, garnet; Spl, spinel; Pys, pyroxenes; Hzb, harzburgite; Lh, lherzolite; Wh, wherlite; P, pressure (GPa); T, temperature (°C). Modal compositions were calculated either from area percentage in polished thin sections and obtained by least-squares method from whole-rock and mineral major oxide analyses (xenoliths 87/100, 87/59, Y-17, Y-25, 87/…
Fe2O3 and FeO of garnets are converted from the measured Fe3+/∑Fe ratios
PNG85: Al-in-Opx (Opx-Gar) barometer of Nickel and Green (1985); PCA91: Al-in-Opx (NG85) barometer modified by Carswell (1991); TTA98: Cpx-Opx thermometer of Taylor (1998)
Na-rich Opx are those with (Na>Cr+Ti)mol. Pcorrected for Na-rich=(PNG85+PCA91)/2; Tcorrected for Na-rich=(TTA98 calculated at PNG85+TTA98 calculated at PCA91)/2.
U9, U267, U506, U507, 87/100, 87/59, Y-17, 87/114, 87/97, Y-1, Y-3, Y-4, Uv-59-03, Uv-45-03, Uv130-03, Uv-89-03 and Uv-42-03 xenoliths did not yield robust P-T estimates. These xenoliths were disregarded and Δlog fO2 [FMQ] values were not computed
